# Supplementary material
Source: PubMed Central journal article supplement (PMC3739047)
Supplement: NIHMS498426-supplement-Supplemental_material.pdf [file NIHMS498426-supplement-Supplemental_material.pdf]

\*\*\*\*\*  
\*\*\*\*\*

Vascular endothelial growth factor receptor 1 - Group: Enzyme  
Treated with:

sunitinib: approved small molecule (198 associated side effects) For the treatment of advanced renal cell carcinoma as well as the treatment of gastrointestinal stromal tumor after disease progression on or intolerance to imatinib mesylate.  
n-(4-chlorophenyl)-2-[(pyridin-4-ylmethyl)amino]benzamide:  
experimental small molecule (0 associated side effects)

198 known side effects mediated through drugs targeting this protein:

Abdominal discomfort Abdominal pain upper Acute coronary syndrome Adrenal insufficiency Ageusia Alanine aminotransferase increased Alopecia Anaemia Angioedema Angiopathy Aortic dissection Aphthous stomatitis Apoptosis Arrhythmia Arthralgia Aspartate aminotransferase increased Asthenia Back pain Blindness Blindness cortical Blister Blood albumin decreased Blood alkaline phosphatase increased Blood amylase increased Blood bilirubin increased Blood creatinine increased Blood glucose decreased Blood glucose increased Blood magnesium decreased Blood phosphorus decreased Blood potassium decreased Blood potassium increased Blood sodium increased Blood thyroid stimulating hormone increased Blood uric acid increased Body temperature increased Bradycardia Cardiac failure Cardiac failure congestive Cell death Cerebral infarction Cerebrovascular accident Chest pain Chills Congenital skin disorder Connective tissue disorder Constipation Convulsion Cough Decreased appetite Deep vein thrombosis Dehydration Depressed mood Dermatitis bullous Dermatitis psoriasiform Diarrhoea Discomfort Dizziness Dry mouth Dry skin Dysgeusia Dyspepsia Dyspnoea Ejection fraction Ejection fraction decreased Electrocardiogram PR interval Embolism Epistaxis Erythema Eye disorder Fatigue Febrile neutropenia Fistula Flank pain Flatulence Gastric haemorrhage Gastrointestinal disorder Gastrointestinal pain Gastrooesophageal reflux disease Gingival pain Gingivitis Glossitis Glossodynia Haematemesia Haematochezia Haematoma Haemoglobin decreased Haemoptysis Haemorrhage Haemorrhoids Hair colour changes Headache Hepatic failure Hypercalcaemia Hyperglycaemia Hyperkalaemia Hybernatraemia Hypersensitivity Hypertension Hyperthyroidism Hyperuricaemia Hypoalbuminaemia Hypocalcaemia Hypogeusia Hypoglycaemia Hypokalaemia Hyponatraemia Hypophosphataemia Hypothyroidism Infarction Infection Infestation Inflammation Influenza Influenza like illness Insomnia Ischaemia Lacrimation increased Left ventricular dysfunction Leukoderma Leukoencephalopathy Leukopenia Lipase increased Lung neoplasm malignant Lymphopenia Malaise Mediastinal disorder Melaena Mental disorder Metastasis Metrorrhagia Microangiopathy Mouth ulceration Mucosal dryness Mucosal inflammation Musculoskeletal discomfort Myalgia Myocardial ischaemia

Myopathy      Nasopharyngitis      Nausea      Necrosis      Neoplasm  
Nephrotic syndrome      Nervous system disorder      Neuropathy  
peripheral Neutropenia Oedema      Oedema peripheral Oesophagitis  
Oral pain      Pain      Pain in extremity Pancreatic disorder  
Pancreatitis      Periorbital oedema      Platelet count  
decreased      Posterior reversible encephalopathy syndrome      Primary  
hypothyroidism      Protein urine present      Proteinuria Prurigo  
Pruritus      Pulmonary embolism      Pulmonary haemorrhage      Rash  
erythematous      Rash follicular      Rash papular      Reflux  
oesophagitis      Regressive behaviour      Renal failure      Renal  
failure acute      Renal impairment      Respiratory tract infection  
Rhabdomyolysis      Skin discolouration      Social avoidant  
behaviour      Splinter haemorrhages      Stomatitis      Thrombocytopenia  
Thrombosis      Thrombotic microangiopathy      Thyroid disorder  
Thyroiditis      Tongue ulceration      Transient ischaemic attack  
Tumour lysis syndrome      Tumour necrosis      Ulcer      Upper respiratory  
tract infection      Venous thrombosis      Ventricular dysfunction  
Visual acuity reduced      Visual impairment      Vomiting      Weight  
decreased      Wound haemorrhage      Yellow skin

\*\*\*\*\*  
\*\*\*\*\*

Nuclear receptor-interacting protein 1 - Group: Other

Treated with:

4-hydroxy-n'-(4-isopropylbenzyl)benzohydrazide:      experimental  
small molecule      (0 associated side effects)

known side effects mediated through drugs targeting this protein:

\*\*\*\*\*  
\*\*\*\*\*

Organic cation/carnitine transporter 2 - Group: Transporter

Treated with:

choline:      approved, nutraceutical small molecule      (0 associated  
side effects)      For nutritional supplementation, also for treating  
dietary shortage or imbalance

l-arginine: approved, nutraceutical small molecule      (20 associated  
side effects)      Used for nutritional supplementation, also for  
treating dietary shortage or imbalance.

creatine:      approved, nutraceutical small molecule      (0 associated  
side effects)      For nutritional supplementation, also for treating  
dietary shortage or imbalance

thiamine:      approved, nutraceutical small molecule      (18 associated  
side effects)      For the treatment of thiamine and niacin deficiency  
states, Korsakov's alcoholic psychosis, Wernicke-Korsakov syndrome,  
delirium, and peripheral neuritis.

amphetamine:      illicit, approved small molecule      (95 associated  
side effects)      For treatment of Attention Deficit Disorder with  
Hyperactivity (ADDH) and narcolepsy in children.

nicotine:      approved      small molecule      (98 associated side effects)  
For the relief of nicotine withdrawal symptoms and as an aid  
to smoking cessation.

lidocaine: approved      small molecule      (120 associated side  
effects)      For production of local or regional anesthesia by  
infiltration techniques such as percutaneous injection and  
intravenous regional anesthesia by peripheral nerve block techniques

such as brachial plexus and intercostal and by central neural techniques such as lumbar and caudal epidural blocks.

valproic acid: approved small molecule (272 associated side effects) For treatment and management of seizure disorders, mania, and prophylactic treatment of migraine headache.

ipratropium bromide: approved small molecule (116 associated side effects) For maintenance treatment of bronchospasm associated with chronic obstructive pulmonary disease, including chronic bronchitis and emphysema.

aminohippurate: approved small molecule (0 associated side effects) Used to measure effective renal plasma flow (ERPF) and to determine the functional capacity of the tubular excretory mechanism.

grepafloxacin: approved, withdrawn small molecule (0 associated side effects) For treatment of adults with mild to moderate infections caused by susceptible strains of <i>Haemophilus influenzae</i>, <i>Streptococcus pneumoniae</i>, or <i>Moraxella catarrhalis</i>.

norepinephrine: approved small molecule (22 associated side effects) Mainly used to treat patients in vasodilatory shock states such as septic shock and neurogenic shock and has shown a survival benefit over dopamine. Also used as a vasopressor medication for patients with critical hypotension.

ampicillin: approved small molecule (30 associated side effects) For treatment of infection (Respiratory, GI, UTI and meningitis) due to *E. coli*, *P. mirabilis*, enterococci, *Shigella*, *S. typhosa* and other *Salmonella*, nonpenicillinase-producing *N. gonorrhoeae*, *H. influenzae*, staphylococci, streptococci including streptoc

ceftazidime: approved small molecule (71 associated side effects) For the treatment of patients with infections caused by susceptible strains of organisms in the following diseases: lower respiratory tract infections, skin and skin structure infections, urinary tract infections, bacterial septicemia, bone and joint infections, gynecologic infections, intra abdominal infections (including peritonitis), and central nervous system infections (including meningitis).

cefalotin: approved small molecule (0 associated side effects) Used to prevent infection during surgery and to treat many kinds of infections of the blood, bone or joints, respiratory tract, skin, and urinary tract.

quinine: approved small molecule (0 associated side effects) For the treatment of malaria and leg cramps

cimetidine: approved small molecule (50 associated side effects) For the treatment and the management of acid-reflux disorders (GERD), peptic ulcer disease, heartburn, and acid indigestion.

cefdinir: approved small molecule (109 associated side effects) For the treatment of the respiratory, skin, soft tissue, and ENT infections caused by <i>H. influenzae</i> (including b-lactamase producing strains), <i>H. parainfluenzae</i> (including b-lactamase producing strains), <i>S. pneumoniae</i> (penicillin-susceptible strains), <i>S. pyogenes</i>, <i>S. aureus</i> (including b-lactamase producing strains), and <i>M. catarrhalis</i>.

guanidine: approved small molecule (0 associated side effects)

For the reduction of the symptoms of muscle weakness and easy fatigability associated with the myasthenic syndrome of Eaton-Lambert. It is not indicated for treating myasthenia gravis.

cephalexin: approved small molecule (65 associated side effects)

For the treatment of respiratory tract infections caused by *Streptococcus pneumoniae*; and *Streptococcus pyogenes*; otitis media due to *Streptococcus pneumoniae*, *Haemophilus influenzae*, *Staphylococcus aureus*, *Streptococcus pyogenes*, and *Moraxella catarrhalis*; skin and skin structure infections caused by *Staphylococcus aureus*; and/or *Streptococcus pyogenes*; bone infections caused by *Staphylococcus aureus*; and/or *Proteus mirabilis*; genitourinary tract infections, including acute prostatitis, caused by *Escherichia coli*, *Proteus mirabilis*, and *Klebsiella pneumoniae*.

clonidine: approved small molecule (161 associated side effects) May be used as an adjunct in the treatment of hypertension, as an epidural infusion as an adjunct treatment in the management of severe cancer pain that is not relieved by opiate analgesics alone, for differential diagnosis of pheochromocytoma in hypertensive patients, prophylaxis of vascular migraine headaches, treatment of severe dysmenorrhea, management of vasomotor symptoms associated with menopause, rapid detoxification in the management of opiate withdrawal, treatment of alcohol withdrawal used in conjunction with benzodiazepines, management of nicotine dependence, topical use to reduce intraocular pressure in the treatment of open-angle and secondary glaucoma and hemorrhagic glaucoma associated with hypertension, and in the treatment of attention-deficit hyperactivity disorder (ADHD).

l-carnitine: approved small molecule (0 associated side effects) For treatment of primary systemic carnitine deficiency, a genetic impairment of normal biosynthesis or utilization of levocarnitine from dietary sources, or for the treatment of secondary carnitine deficiency resulting from an inborn error of metabolism such as glutaric aciduria II, methyl malonic aciduria, propionic acidemia, and medium chain fatty acylCoA dehydrogenase deficiency. Used therapeutically to stimulate gastric and pancreatic secretions and in the treatment of hyperlipoproteinemias. Parenteral levocarnitine is indicated for the prevention and treatment of carnitine deficiency in patients with end-stage renal disease.

verapamil: approved small molecule (113 associated side effects) For the treatment of hypertension, angina, and cluster headache prophylaxis.

histamine phosphate: approved small molecule (0 associated side effects) Histamine phosphate is indicated as a diagnostic aid for evaluation of gastric acid secretory function.

cefixime: approved small molecule (55 associated side effects)

For use in the treatment of the following infections when caused by susceptible strains of the designated microorganisms: (1) uncomplicated urinary tract infections caused by *Escherichia coli* and *Proteus*

mirabilis</i>;, (2) otitis media caused by <i>Haemophilus influenzae</i> (beta-lactamase positive and negative strains), <i>Moraxella catarrhalis</i> (most of which are beta-lactamase positive), and <i>S. pyogenes</i>;, (3) pharyngitis and tonsillitis caused by <i>S. pyogenes</i>;, (4) acute bronchitis and acute exacerbations of chronic bronchitis caused by <i>Streptococcus pneumoniae</i> and <i>Haemophilus influenzae</i> (beta-lactamase positive and negative strains), and (5) uncomplicated gonorrhea (cervical/urethral) caused by <i>Neisseria gonorrhoeae</i> (penicillinase- and non-penicillinase-producing strains).

cephalglycin: approved small molecule (0 associated side effects) For treatment of severe infections caused by susceptible bacteria.

furosemide: approved small molecule (112 associated side effects) For the treatment of edema associated with congestive heart failure, cirrhosis of the liver, and renal disease, including the nephrotic syndrome. Also for the treatment of hypertension alone or in combination with other antihypertensive agents.

quinidine: approved small molecule (146 associated side effects) For the treatment of ventricular pre-excitation and cardiac dysrhythmias

dactinomycin: approved small molecule (0 associated side effects) For the treatment of Wilms' tumor, childhood rhabdomyosarcoma, Ewing's sarcoma and metastatic, nonseminomatous testicular cancer as part of a combination chemotherapy and/or multi-modality treatment regimen

lomefloxacin: approved small molecule (204 associated side effects) For the treatment of bacterial infections of the respiratory tract (chronic bronchitis) and urinary tract, and as a pre-operative prophylactic to prevent urinary tract infection caused by: <i>S.pneumoniae</i>;, <i>H.influenzae</i>;, <i>S.aureus</i>;, <i>P.aeruginosa</i>;, <i>E. cloacae</i>;, <i>P. mirabilis</i>;, <i>C. civersus</i>;, <i>S. asprphyticus</i>;, <i>E.coli</i>;, and <i>K.pneumoniae</i>.

cyclacillin: approved small molecule (0 associated side effects) For the treatment of bacterial infections caused by susceptible organisms.

probenecid: approved small molecule (27 associated side effects) For the reduction of serum uric acid concentrations in chronic gouty arthritis and tophaceous gout in patients with frequent disabling gout attacks. Has also been effectively used to promote uric acid excretion in hyperuricemia secondary to the administration of thiazide and related diuretics.

procainamide: approved small molecule (55 associated side effects) For the treatment of life-threatening ventricular arrhythmias.

penicillin g: approved small molecule (0 associated side effects) For use in the treatment of severe infections caused by penicillin G-susceptible microorganisms when rapid and high penicillin levels are required such as in the treatment of

septicemia, meningitis, pericarditis, endocarditis and severe pneumonia.

norfloxacin: approved small molecule (154 associated side effects) For the treatment of urinary tract infection

diphenhydramine: approved small molecule (51 associated side effects) For the treatment of symptoms associated with Vertigo/Meniere's disease, nausea and vomiting, motion sickness and insect bite.

cefadroxil: approved small molecule (63 associated side effects)

For the treatment of the following infections (skin, UTI, ENT) caused by; &lt;i>S. pneumoniae, H. influenzae, staphylococci, S. pyogenes&lt;/i> (group A beta-hemolytic streptococci),

&lt;i>E. coli, P. mirabilis, Klebsiella&lt;/i> sp, coagulase-negative staphylococci and &lt;i>Streptococcus pyogenes&lt;/i>;

desipramine: approved small molecule (120 associated side effects) For relief of symptoms in various depressive syndromes, especially endogenous depression. It has also been used to manage chronic peripheral neuropathic pain, as a second line agent for the management of anxiety disorders (e.g. panic disorder, generalized anxiety disorder), and as a second or third line agent in the ADHD management.

ofloxacin: approved small molecule (407 associated side effects) For the treatment of infections (respiratory tract, kidney, skin, soft tissue, UTI), urethral and cervical gonorrhoea.

sparfloxacin: approved small molecule (0 associated side effects) For the treatment of adults with the following infections

caused by susceptible strains microorganisms: community-acquired pneumonia (caused by &lt;i>Chlamydia pneumoniae&lt;/i>, &lt;i>Haemophilus influenzae&lt;/i>, &lt;i>Haemophilus parainfluenzae&lt;/i>, &lt;i>Moraxella catarrhalis&lt;/i>, &lt;i>Mycoplasma pneumoniae&lt;/i>, or &lt;i>Streptococcus pneumoniae&lt;/i>) and acute bacterial exacerbations of chronic bronchitis (caused by &lt;i>Chlamydia pneumoniae&lt;/i>, &lt;i>Enterobacter cloacae&lt;/i>, &lt;i>Haemophilus influenzae&lt;/i>, &lt;i>Haemophilus parainfluenzae&lt;/i>, &lt;i>Klebsiella pneumoniae&lt;/i>, &lt;i>Moraxella catarrhalis&lt;/i>, &lt;i>Staphylococcus aureus&lt;/i>, or &lt;i>Streptococcus pneumoniae&lt;/i>).

cefradine: approved small molecule (0 associated side effects)

tiotropium: approved small molecule (60 associated side effects)

Used in the management of chronic obstructive pulmonary disease (COPD).

cefepime: approved small molecule (73 associated side effects)

For the treatment of pneumonia (moderate to severe) caused by &lt;i>Streptococcus pneumoniae&lt;/i>, including cases associated with concurrent bacteremia, &lt;i>Pseudomonas aeruginosa&lt;/i>, &lt;i>Klebsiella pneumoniae&lt;/i>, or &lt;i>Enterobacter&lt;/i> species. Also for empiric treatment of febrile neutropenic patients and uncomplicated and complicated urinary tract infections (including pyelonephritis) caused by &lt;i>Escherichia coli&lt;/i> or &lt;i>Klebsiella pneumoniae&lt;/i>, when the infection is severe, or caused by &lt;i>Escherichia coli&lt;/i>, &lt;i>Klebsiella pneumoniae&lt;/i>, or &lt;i>Proteus mirabilis&lt;/i>, when the infection is mild to moderate, including cases associated with

concurrent bacteremia with these microorganisms. Also for the treatment of uncomplicated skin and skin structure infections caused by *Staphylococcus aureus* (methicillin-susceptible strains only) or *Streptococcus pyogenes*; and complicated intra-abdominal infections (used in combination with metronidazole) caused by *Escherichia coli*, viridans group streptococci, *Pseudomonas aeruginosa*, *Klebsiella pneumoniae*, *Enterobacter* species, or *Bacteroides fragilis*.

methamphetamine: illicit, approved small molecule (30 associated side effects) For the treatment of Attention Deficit Disorder with Hyperactivity (ADHD) and exogenous obesity.

acetylcholine: experimental small molecule (0 associated side effects)

aldosterone: experimental small molecule (0 associated side effects)

azidocillin: approved small molecule (0 associated side effects) For treatment of infection (Respiratory, GI, UTI and meningitis) due to *E. coli*, *P. mirabilis*, enterococci, *Shigella*, *S. typhosa* and other *Salmonella*, nonpenicillinase-producing *N. gonorrhoeae*, *H. influenzae*, staphylococci, streptococci including streptoc

837 known side effects mediated through drugs targeting this protein:

Abdominal discomfort Abdominal distension Abdominal mass  
 Abdominal pain Abdominal pain upper Abnormal dreams  
 Abnormal faeces Abscess Accommodation disorder Acidosis  
 Acne Acute coronary syndrome Acute generalised  
 exanthematous pustulosis Acute respiratory distress syndrome  
 Acute respiratory failure Adenoma benign Affect lability  
 Ageusia Aggression Agitation Agranulocytosis Alanine  
 aminotransferase increased Albuminuria Alkalosis Alopecia  
 Alveolitis allergic Amblyopia Amenorrhoea Amino acid  
 metabolism disorder Ammonia increased Amnesia Anaemia Anal  
 pruritus Anaphylactic shock Anaphylactoid reaction Angina  
 pectoris Angioedema Angiopathy Angle closure glaucoma Anorectal  
 discomfort Anosmia Anterior spinal artery syndrome Antinuclear  
 antibody positive Anuria Anxiety Anxiety disorder Aortic  
 dissection Apathy Aphasia Aplastic anaemia Apnoea  
 Application site reaction Arachnoiditis Arrhythmia  
 Arterial disorder Arthralgia Arthritis Arthropathy Ascites  
 Aspartate aminotransferase increased Asphyxia Aspiration  
 Assisted fertilisation Asterixis Asthenia Asthma  
 Ataxia Atelectasis Atrial fibrillation Atrial flutter  
 Atrioventricular block Atrioventricular block complete  
 Atrioventricular block second degree Atrioventricular  
 dissociation Atrophy Attention deficit/hyperactivity  
 disorder Aura Autism spectrum disorder Autonomic neuropathy  
 Azotaemia Back pain Balance disorder Benign intracranial  
 hypertension Benign prostatic hyperplasia Bladder dilatation  
 Bladder neck obstruction Bladder pain Bladder spasm  
 Bleeding time prolonged Blindness Blister Blood  
 albumin decreased Blood albumin increased Blood alkaline

phosphatase increased Blood amylase increased Blood bilirubin  
 increased Blood creatinine increased Blood electrolytes abnormal  
 Blood fibrinogen decreased Blood glucose abnormal Blood  
 glucose decreased Blood lactate dehydrogenase increased Blood  
 phosphorus decreased Blood potassium decreased Blood potassium  
 increased Blood pressure increased Blood pressure systolic  
 increased Blood prolactin increased Blood urea increased Blood  
 uric acid increased Body temperature decreased Body temperature  
 increased Bone pain Bradycardia Bradyphrenia Breast disorder  
 Breast enlargement Breast feeding Breath odour  
 Bronchitis Bronchospasm Bronchospasm paradoxical  
 Burning sensation Bursitis Candidiasis Candiduria Cardiac  
 arrest Cardiac death Cardiac disorder Cardiac failure  
 Cardiac failure congestive Cardiac fibrillation Cardiac  
 flutter Cardiac output decreased Cardio-respiratory arrest  
 Cardiomyopathy Cardiovascular disorder Cataract  
 Catatonia Cauda equina syndrome Cerebral artery thrombosis  
 Cerebral atrophy Cerebral haemorrhage Cerebral ischaemia  
 Cerebral thrombosis Cerebrovascular accident  
 Cerebrovascular disorder Chemical eye injury Chest  
 discomfort Chest pain Chills Choking sensation Cholecystitis  
 Cholelithiasis Cholestasis Cholinergic syndrome  
 Choreoathetosis Chromaturia Chronic obstructive pulmonary  
 disease Cluster headache Coagulopathy Colitis Colonic  
 pseudo-obstruction Coma Coma hepatic Completed suicide  
 Condition aggravated Conduction disorder Confusional state  
 Congenital anomaly Conjunctival hyperaemia  
 Conjunctival oedema Conjunctivitis Connective tissue  
 disorder Constipation Convulsion Coombs direct test positive  
 Coombs test positive Coordination abnormal Corneal erosion  
 Corneal oedema Coronary artery disease Coronary artery  
 thrombosis Cough Cranial nerve paralysis Crocodile tears  
 syndrome Crying Crystal urine Crystalluria Cutaneous  
 lupus erythematosus Cutaneous vasculitis Cyanosis Cystitis  
 Cystitis noninfective Deafness Deafness permanent Death  
 Decreased appetite Dehydration Delirium Delusion  
 Dementia Dental caries Dependence Depersonalisation  
 Depressed level of consciousness Depression Depressive  
 symptom Dermatitis Dermatitis bullous Dermatitis contact  
 Dermatitis diaper Dermatitis exfoliative Developmental delay  
 Device related infection Diabetes mellitus Diarrhoea  
 Diarrhoea haemorrhagic Diplegia Diplopia Disability  
 Discomfort Disease progression Disorientation  
 Disseminated intravascular coagulation Dissociation  
 Disturbance in attention Disturbance in sexual arousal  
 Dizziness Drug abuse Drug dependence Drug eruption Drug  
 interaction Drug level increased Drug withdrawal syndrome Dry  
 eye Dry mouth Dry skin Dry throat Dysaesthesia Dysarthria  
 Dysgeusia Dyskinesia Dysmenorrhoea Dyspepsia Dysphagia  
 Dysphonia Dysphoria Dysplasia Dyspnoea Dystonia  
 Dysuria Ear disorder Ear haemorrhage Ear infection  
 Ear pain Ecchymosis Eczema Effusion Ejaculation  
 failure Elderly Electrocardiogram QRS complex  
 Electrocardiogram QT prolonged Electrocardiogram abnormal  
 Electrocardiogram normal Electroencephalogram abnormal



Electrolyte depletion    Electrolyte imbalance    Embolism  
 Emotional disorder    Emotional distress    Emphysema  
 Encephalopathy    Endocarditis    Endocrine disorder  
 Enterocolitis    Enterocolitis haemorrhagic    Enuresis  
 Eosinophilia    Eosinophilic pneumonia    Epidermal necrosis  
 Epidermolysis bullosa    Epididymitis    Epistaxis    Erectile  
 dysfunction    Eructation    Erythema multiforme    Erythema nodosum  
 Euphoric mood    Extradural abscess    Extrapyrarnidal  
 disorder    Extrasystoles    Extravasation    Eye disorder    Eye  
 infection    Eye irritation    Eye pain    Eye pruritus    Face oedema  
 Factor I deficiency    Faecal incontinence    Fanconi syndrome  
 Fasting    Fatigue    Fear    Febrile neutropenia    Feeling  
 abnormal    Feeling cold    Feeling hot    Fibrosarcoma    Fibrosis  
 Flat affect    Flatulence    Fluid overload    Flushing    Foetor  
 hepaticus    Folate deficiency    Formication    Fungal infection    Furuncle  
 Gait disturbance    Galactorrhoea    Gangrene    Gastritis  
 Gastroenteritis    Gastrointestinal disorder    Gastrointestinal  
 haemorrhage    Gastrointestinal motility disorder    Gastrointestinal  
 oedema    Gastrointestinal pain    Gastrointestinal tract irritation  
 Gastrooesophageal reflux disease    Genital candidiasis  
 Genital discharge    Gigantism    Gingival bleeding    Gingival  
 hyperplasia    Gingival pain    Gingivitis    Glaucoma  
 Glomerulonephritis    Glossitis    Glucose tolerance impaired  
 Glycosuria    Gout    Grand mal convulsion    Granulomatous liver  
 disease    Growth retardation    Gynaecomastia    Haematemesis  
 Haematocrit decreased    Haematoma    Haematuria    Haemoglobin  
 Haemoglobinuria    Haemolysis    Haemolytic anaemia    Haemolytic  
 uraemic syndrome    Haemoptysis    Haemorrhage    Haemorrhagic disorder  
 Haemorrhoids    Hallucination    Hallucination, auditory  
 Hallucinations, mixed    Halo vision    Headache    Hearing impaired  
 Hemiplegia    Hepatic cirrhosis    Hepatic encephalopathy    Hepatic  
 enzyme increased    Hepatic failure    Hepatic fibrosis    Hepatic function  
 abnormal    Hepatic necrosis    Hepatitis    Hepatitis acute    Hepatitis  
 fulminant    Hepatobiliary disease    Hepatocellular injury    Herpes  
 simplex    Herpes virus infection    Herpes zoster    Hiccups  
 Hormone level abnormal    Hostility    Hot flush    Hydronephrosis  
 Hyperacusis    Hyperaemia    Hyperaesthesia    Hyperammonaemia  
 Hyperbilirubinaemia    Hypercalcaemia    Hypercholesterolaemia  
 Hypercoagulation    Hypergammaglobulinaemia    Hyperglycaemia  
 Hyperhidrosis    Hyperkalaemia    Hyperkeratosis  
 Hyperkinesia    Hypernatraemia    Hyperplasia  
 Hyperprolactinaemia    Hyperpyrexia    Hyperreflexia  
 Hypersensitivity    Hypertension    Hyperthermia  
 Hyperthyroidism    Hypertonia    Hypertrophic cardiomyopathy  
 Hypertrophy    Hyperuricaemia    Hypoaesthesia    Hypoaesthesia  
 oral    Hypocalcaemia    Hypocoagulable state    Hypoglycaemia  
 Hypokalaemia    Hypokinesia    Hypomagnesaemia    Hypomania  
 Hyponatraemia    Hypophosphataemia    Hypoproteinaemia  
 Hypoproteinaemia    Hyposthenuria    Hypotension    Hypothermia  
 Hypoventilation    Hypovolaemia    Hypoxia    Idiopathic  
 thrombocytopenic purpura    Ileus    Ileus paralytic    Ill-defined  
 disorder    Immune system disorder    Inappropriate antidiuretic hormone  
 secretion    Incontinence    Increased appetite    Increased  
 bronchial secretion    Induration    Infarction    Infection    Infestation  
 Inflammation    Influenza    Influenza like illness    Injection

site inflammation Injection site pain Injection site reaction  
 Insomnia Intermittent claudication Intermittent explosive  
 disorder Interstitial lung disease Intestinal obstruction  
 Intestinal perforation Intracranial pressure increased  
 Intraocular pressure increased Irritability Ischaemia  
 Jaundice Jaundice cholestatic Joint stiffness Joint  
 swelling Keratitis Labyrinthitis Lacrimation decreased  
 Lacrimation increased Lactic acidosis Laryngeal oedema  
 Laryngitis Laryngospasm Lens disorder Lenticular  
 opacities Lethargy Leukocytoclastic vasculitis Leukocytosis  
 Leukoderma Leukopenia Libido decreased Liver disorder Liver  
 function test abnormal Local reaction Loss of consciousness Loss  
 of libido Lower respiratory tract infection Lymphadenitis  
 Lymphadenopathy Lymphocytosis Lymphopenia Macrocytosis  
 Macule Maculopathy Malaise Mania Mass Mediastinal  
 disorder Melaena Melkersson-Rosenthal syndrome Meningism  
 Meningitis Menopausal symptoms Menorrhagia Menstrual  
 disorder Menstruation irregular Mental disability Mental disorder  
 Mental retardation Metabolic acidosis Metabolic  
 alkalosis Methaemoglobinaemia Metrorrhagia Microsomia  
 Micturition disorder Migraine Miosis Monocytosis  
 Monoplegia Mood swings Mouth ulceration Mucosal inflammation  
 Mucosal ulceration Multi-organ failure Multiple  
 hereditary exostosis Muscle contractions involuntary Muscle  
 fatigue Muscle rigidity Muscle spasms Muscle twitching  
 Muscular weakness Musculoskeletal discomfort Musculoskeletal  
 disorder Musculoskeletal stiffness Myalgia Myasthenia gravis  
 Mydriasis Myocardial depression Myocardial infarction  
 Myoclonus Myositis Nasal congestion Nasal discomfort Nasal  
 dryness Nasal oedema Nasal polyps Nasal ulcer  
 Nasopharyngitis Nausea Neck pain Necrosis Neoplasm  
 Neoplasm malignant Nephritis Nephrocalcinosis  
 Nephrolithiasis Nephropathy Nephropathy toxic Nephrotic  
 syndrome Nervous system disorder Nervousness Neural tube  
 defect Neuritis Neuroleptic malignant syndrome Neuropathy  
 peripheral Neutropenia Neutrophilia Night blindness Nightmare  
 Nocturia Nodal arrhythmia Nodule Nonketotic  
 hyperglycinaemia Nuchal rigidity Nystagmus Obstruction Obstructive  
 airways disorder Oedema Oedema mouth Oedema peripheral  
 Oesophagitis Oligomenorrhoea Oliguria Optic nerve  
 disorder Optic neuritis Oral candidiasis Orchitis noninfective  
 Organ failure Oropharyngeal discomfort Oropharyngeal  
 pain Orthostatic hypotension Orthostatic intolerance  
 Osteoarthritis Osteoarthropathy Osteomyelitis Otitis  
 media Otitis media acute Ovarian disorder Pain Pain in extremity  
 Pain in jaw Pallor Palpitations Pancreatic disorder  
 Pancreatitis acute Pancytopenia Panic attack Panic  
 reaction Papule Paraesthesia Paraesthesia oral Paralysis  
 Paranoia Paraplegia Parosmia Parotid gland enlargement  
 Parotitis Patent ductus arteriosus Pathological fracture  
 Pemphigoid Peptic ulcer Pericarditis Perineal pain  
 Personality change Personality disorder Petechiae Petit  
 mal epilepsy Pharyngeal oedema Pharyngitis Phlebitis Phobia  
 Photophobia Photosensitivity reaction Pigmentation disorder  
 Piloerection Plasmodium falciparum infection Platelet

count decreased Platelet disorderPleural disorder Pleural effusion  
 Pleurisy Pneumonia Pneumothorax Poisoning Pollakiuria  
 Polycystic ovaries Polydipsia Polymyositis  
 Polyneuropathy Polyp Polyuria Porphyria Porphyria acute  
 Pressure of speech Proctalgia Prostatic disorder  
 Protein urine present Proteinuria Prothrombin level decreased  
 Prothrombin level increased Pruritus Pruritus generalised  
 Pruritus genital Pseudomembranous colitis Psychotic  
 disorder Pulmonary embolism Pulmonary function test decreased  
 Pulmonary oedema Purpura Pyuria Quadripareisis Rash  
 Rash erythematousRash follicular Rash generalised Rash  
 macular Rash maculo-papular Rash pustular Raynaud's  
 phenomenon Renal colicRenal failure Renal failure acute Renal  
 impairment Renal tubular disorder Respiratory arrest Respiratory  
 depression Respiratory disorder Respiratory failure Respiratory  
 paralysis Respiratory tract infection Retinitis pigmentosa  
 Rhabdomyolysis Rhinitis Rhinitis seasonalRhinorrhoea  
 Salivary gland pain Salivary hypersecretion  
 Sarcosinaemia Schizophrenia Scotoma Seasonal allergy  
 Seborrhoeic dermatitis Sedation Sensation of foreign body  
 Sensitisation Sensory loss Sepsis Serum sickness  
 Sexual dysfunction Shock Sicca syndrome Sick sinus  
 syndrome Sinus arrest Sinus bradycardiaSinusitis Skin  
 candida Skin discolouration Skin disorder Skin exfoliation  
 Skin hyperpigmentation Skin necrosis Skin ulcer Sleep  
 disorder Sleep terror Sneezing Social avoidant behaviour  
 Somnolence Speech disorder Spina bifida Sputum increased  
 Status asthmaticus Status epilepticus Stevens-Johnson  
 syndrome Stickler's syndrome Stomatitis Strangury Stridor  
 Strongyloidiasis Stupor Subarachnoid haemorrhage  
 Sudden death Sudden visual loss Suicidal ideation  
 Suicide attempt Superinfection Supraventricular tachycardia  
 Surgery Swelling Syncope Synovitis Systemic lupus  
 erythematosus TachycardiaTardive dyskinesia Tearfulness  
 Tenderness Tendon disorder Tendonitis Tension  
 Teratogenicity Testicular atrophy Testicular swelling  
 Tetany Thinking abnormalThirst Thought blocking  
 Throat irritationThroat tightness Thrombocytopenia  
 Thrombocytopenic purpura Thrombocytosis Thrombophlebitis  
 Thrombosis Thrombotic thrombocytopenic purpura Thyroid  
 disorder Thyroid function test abnormal Tic Tinnitus  
 Tobacco user Tongue discolouration Tongue disorder  
 Tongue oedema Tooth abscess Tooth disorder Torsade de  
 pointes Toxic epidermal necrolysis Tremor  
 Tubulointerstitial nephritis Type I hypersensitivity Ulcer  
 Upper gastrointestinal haemorrhageUpper respiratory tract  
 infection Urethral disorderUrinary incontinence Urinary retention  
 Urinary tract disorder Urinary tract infection Urine  
 output increased Urticaria Uveitis Vaginal dischargeVaginal  
 haemorrhageVaginal infectionVaginal inflammation Vascular anomaly  
 Vascular purpura Vascular resistance systemic Vasculitis  
 Vasculitis necrotising Vasoconstriction Vasodilation procedure  
 Venous thrombosisVentricular arrhythmia Ventricular  
 extrasystoles Ventricular fibrillation Ventricular  
 tachycardiaVertigo Viral diarrhoea Viral infection Vision

blurred Visual acuity reduced Visual impairment Vitreous floaters  
Vomiting Vulvovaginal candidiasis Vulvovaginal mycotic  
infection Weight decreased Weight increased Wheezing White blood  
cell count decreased White blood cell disorder White blood cells  
urine positive Withdrawal hypertension Withdrawal syndrome  
Xanthopsia

\*\*\*\*\*  
\*\*\*\*\*

Receptor activity-modifying protein 1 - Group: Other

Treated with:

pramlintide: approved biotech (17 associated side effects)

For the treatment of type 1 and type 2 diabetes mellitus as an adjunct to preprandial insulin therapy in patients without adequate glycemic control of insulin therapy.

17 known side effects mediated through drugs targeting this protein:

Abdominal pain Arthralgia Asthenia Cough Decreased appetite  
Dizziness Fatigue Gastrointestinal pain Headache  
Hypersensitivity Hypoglycaemia Injection site reaction  
Musculoskeletal discomfort Nausea Pain Pharyngitis  
Vomiting

\*\*\*\*\*  
\*\*\*\*\*

Mineralocorticoid receptor - Group: Receptor

Treated with:

nimodipine: approved small molecule (47 associated side effects)

For use as an adjunct to improve neurologic outcome following subarachnoid hemorrhage (SAH) from ruptured intracranial berry aneurysms by reducing the incidence and severity of ischemic deficits.

progesterone: approved small molecule (256 associated side effects) For progesterone supplementation or replacement as part of an Assisted Reproductive Technology (ART) treatment for infertile women with progesterone deficiency and for the treatment of secondary amenorrhea. Also used for the reduction of the incidence of endometrial hyperplasia and the attendant risk of endometrial carcinoma in postmenopausal women receiving estrogen replacement therapy, as well as treatment of abnormal uterine bleeding due to hormonal imbalance in the absence of organic pathology such as fibroids or uterine cancer.

spironolactone: approved small molecule (34 associated side effects) Used primarily to treat low-renin hypertension, hypokalemia, and Conn's syndrome.

fluticasone propionate: approved small molecule (0 associated side effects) For the maintenance treatment of asthma as prophylactic therapy and for patients requiring oral corticosteroid therapy for asthma.

fludrocortisone: approved small molecule (81 associated side effects) For partial replacement therapy for primary and secondary adrenocortical insufficiency in Addison's disease and for the treatment of salt-losing adrenogenital syndrome.

eplerenone: approved small molecule (38 associated side effects)

For improvement of survival of stable patients with left ventricular systolic dysfunction (ejection fraction <40%) and

clinical evidence of congestive heart failure after an acute myocardial infarction.

felodipine: approved small molecule (96 associated side effects)

For the treatment of mild to moderate essential hypertension.

desoxycorticosterone pivalate: experimental small molecule

(0 associated side effects) Examined for treatment of adrenocortical insufficiency especially in multiple sclerosis, congenital cerebral palsy, polyarteritis nodosa, and rheumatoid arthritis. Currently only approved in treating cats and dogs for the treatment of Addison's disease.

drospirenone: approved small molecule (0 associated side effects) For the prevention of pregnancy in women who elect an oral contraceptive.

aldosterone: experimental small molecule (0 associated side effects)

(11-beta)-11,21-dihydroxy-pregn-4-ene-3,20-dione: experimental small molecule (0 associated side effects)

374 known side effects mediated through drugs targeting this protein:

Abdominal distension Abdominal pain Abortion spontaneous  
Abscess Acne Acute coronary syndrome Affect lability  
Aggression Agranulocytosis Alanine aminotransferase increased  
Albuminuria Alcohol poisoning Alkalosis Alkalosis hypokalaemic  
Alopecia Amenorrhoea Anaemia Anaphylactic shock  
Anaphylactoid reaction Angina pectoris Angioedema Angiopathy  
Anorectal disorder Anxiety Anxiety disorder Aortic  
dissection Arrhythmia Arthralgia Arthritis Aspartate  
aminotransferase increased Asthenia Asthma Ataxia  
Atrophy Autonomic neuropathy Back pain Benign  
intracranial hypertension Bladder pain Blindness Blood  
alkaline phosphatase increased Blood cholesterol increased Blood  
creatinine increased Blood glucose increased Blood lactate  
dehydrogenase increased Blood pressure increased Blood  
triglycerides increased Blood urea increased Blood uric acid  
Body temperature increased Bone pain Bradycardia Breast  
cancer Breast discharge Breast disorder Breast enlargement  
Breast pain Breast tenderness Bromosulphthalein test abnormal  
Bronchitis Candidiasis Carbohydrate tolerance decreased  
Cardiac disorder Cardiac failure Cardiac failure congestive  
Cardiac septal defect Cardiomegaly Cardiovascular  
disorder Cataract Cataract subcapsular Cerebral artery  
thrombosis Cerebral thrombosis Chest pain Chloasma Choking  
Cholestasis Chorea Cleft lip Cleft palate Compression  
fracture Confusional state Conjunctivitis Connective tissue  
disorder Constipation Convulsion Cough Crying Cushingoid  
Cystitis Cystitis noninfective Death Decreased appetite  
Deep vein thrombosis Depersonalisation Depressed level of  
consciousness Depression Dermatitis Dermatitis acneiform  
Dermatitis atopic Diabetes mellitus Diaphragmatic hernia  
Diarrhoea Diplopia Discomfort Disorientation  
Disseminated intravascular coagulation Disturbance in  
attention Disturbance in sexual arousal Dizziness Drug  
eruption Dry mouth Dysarthria Dysmenorrhoea Dyspareunia  
Dyspepsia Dysphagia Dyspnoea Dysuria Ear pain

Ecchymosis Electrolyte imbalance Embolism Endometrial  
 cancer Eosinophilia Epistaxis Erectile dysfunction  
 Eructation Erythema Erythema multiforme Erythema nodosum  
 Exophthalmos Extrasystoles Eye disorder Face oedema  
 Fasting Fatigue Feeling abnormal Feeling drunk  
 Flatulence Fluid retention Flushing Fungal infection Gait  
 disturbance Galactorrhoea Gallbladder disorder Gamma-  
 glutamyltransferase increased Gastric haemorrhage Gastritis  
 Gastroenteritis Gastrointestinal disorder Gastrointestinal  
 haemorrhage Gastrointestinal pain Genital candidiasis Genital  
 discharge Gingival hyperplasia Glaucoma Glomerulonephritis  
 membranous Glucose tolerance impaired Glycosuria Gynaecomastia  
 Haemangioma Haematoma Haemoglobin Haemorrhage Headache Heart  
 disease congenital Hepatic enzyme increased Hepatic failure  
 Hepatic function abnormal Hepatic necrosis Hepatitis  
 Hepatitis cholestatic Hepatobiliary disease Hereditary  
 disorder Hernia Herpes simplex Herpes virus infection  
 Hirsutism Hot flush Hypercholesterolaemia Hyperglycaemia  
 Hyperhidrosis Hyperkalaemia Hyponatraemia Hyperplasia  
 Hypersensitivity Hypertension Hypertonia  
 Hypertriglyceridaemia Hypertrophy Hyperventilation  
 Hypocalcaemia Hypokalaemia Hyponatraemia Hypotension  
 Immune system disorder Impaired healing Increased appetite  
 Infarction Infection Infestation Influenza Influenza like  
 illness Insomnia Interstitial lung disease Intracranial  
 pressure increased Intraocular pressure increased  
 Irritability Jaundice Jaundice cholestatic Lethargy  
 Leukocytoclastic vasculitis Libido decreased Lipoatrophy Liver  
 function test abnormal Loss of consciousness Lymphadenopathy  
 Malaise Mass Mediastinal disorder Memory impairment  
 Menopausal symptoms Menorrhagia Menstrual disorder  
 Menstruation irregular Mental disability Mental disorder  
 Metrorrhagia Microalbuminuria Micturition urgency  
 Migraine Mood swings Muscle mass Muscle spasms Muscular  
 weakness Musculoskeletal discomfort Musculoskeletal disorder  
 Musculoskeletal pain Myalgia Myocardial infarction  
 Myopathy Nasal congestion Nasopharyngitis Nausea  
 Necrosis Neoplasm Neoplasm malignant Nervous system  
 disorder Nervousness Neuritis Neuropathy peripheral Night  
 sweats Nitrogen balance negative Nocturia Oedema  
 Oedema peripheral Oesophagitis Oesophagitis ulcerative  
 Optic neuritis Orthostatic hypotension Osteoarthritis  
 Osteonecrosis Osteoporosis Ovarian cancer Ovarian  
 cyst Ovarian failure Ovarian hyperstimulation syndrome Pain Pain  
 in extremity Palpitations Pancreatitis acute  
 Papilloedema Paraesthesia Patent ductus arteriosus  
 Pathological fracture Peptic ulcer Perineal pain  
 Personality disorder Petechiae Pharyngitis Photosensitivity  
 reaction Platelet count decreased Pneumonia Pollakiuria  
 Polyuria Porphyria Postmenopausal haemorrhage  
 Premenstrual syndrome Protein urine absent Protein urine  
 present Proteinuria Pruritus Pruritus genital Pulmonary  
 embolism Purpura Rash Rash generalised Rash maculo-papular  
 Regurgitation Renal failure Renal impairment Respiratory  
 disorder Respiratory tract infection Rhinitis Rhinorrhoea

Salivary gland enlargement    Seborrhoeic dermatitis    Sedation  
Sexual dysfunction    Shock    Sinusitis    Skin discolouration  
Skin disorder    Skin hyperpigmentation    Skin papilloma    Skin  
striae    Skin test positive    Skin tightness    Sleep disorder  
Sneezing    Somnolence    Speech disorder    Stupor    Suicidal  
ideation    Swelling    Swollen tongue    Syncope    Tachycardia  
Tenderness    Tension    Thirst    Throat tightness  
Thrombocytopenia    Thrombophlebitis    Thrombosis    Tinnitus    Tooth  
disorder    Toothache    Toxic epidermal necrolysis    Transaminases  
increased    Transient ischaemic attack    Tremor    Type 2 diabetes  
mellitus    Ulcer    Upper respiratory tract infection    Urethral disorder  
Urinary tract disorder    Urinary tract infection    Urine  
output increased    Urticaria    Uterine cervical erosion    Uterine  
leiomyoma    Uterine spasm    Vaginal discharge    Vaginal haemorrhage  
Vaginal infection    Vaginal inflammation    Vascular purpura  
Vasculitis    Vasculitis necrotising    Vasospasm    Venous thrombosis  
Ventricular septal defect    Vertigo    Viral infection  
Vision blurred    Visual acuity reduced    Visual impairment  
Vomiting    Vulvovaginal discomfort    Vulvovaginal dryness  
Weight decreased    Weight increased    Wheezing    Xerophthalmia

\*\*\*\*\*  
\*\*\*\*\*

Adenosine A2a receptor - Group: Receptor

Treated with:

caffeine: approved    small molecule    (32 associated side effects)

For management of fatigue, orthostatic hypotension, and for the short term treatment of apnea of prematurity in infants.

theophylline: approved    small molecule    (60 associated side effects)    For the treatment of the symptoms and reversible airflow obstruction associated with chronic asthma and other chronic lung diseases, such as emphysema and chronic bronchitis.

mefloquine: approved    small molecule    (98 associated side effects)

For the treatment of mild to moderate acute malaria caused by Mefloquine-susceptible strains of *Plasmodium falciparum*; (both chloroquine-susceptible and resistant strains) or by *Plasmodium vivax*. Also for the prophylaxis of *Plasmodium falciparum* and *Plasmodium vivax*; malaria infections, including prophylaxis of chloroquine-resistant strains of *Plasmodium falciparum*.

adenosine: approved    small molecule    (32 associated side effects)

Used as an initial treatment for the termination of paroxysmal supraventricular tachycardia (PVST), including that associated with accessory bypass tracts, and is a drug of choice for terminating stable, narrow-complex supraventricular tachycardias (SVT). Also used as an adjunct to thallous chloride TI 201 myocardial perfusion scintigraphy (thallium stress test) in patients who are unable to exercise adequately, as well as an adjunct to vagal maneuvers and clinical assessment to establish a specific diagnosis of undefined, stable, narrow-complex SVT.

dyphylline: approved    small molecule    (27 associated side effects)

For relief of acute bronchial asthma and for reversible bronchospasm associated with chronic bronchitis and emphysema.

pentoxifylline: approved    small molecule    (93 associated side effects)    For the treatment of patients with intermittent lameness

or immobility arising from chronic occlusive arterial disease of the limbs.

oxtriphylline: approved small molecule (0 associated side effects) Used to treat the symptoms of asthma, bronchitis, and emphysema.

theobromine: approved small molecule (0 associated side effects) theobromine is used as a vasodilator, a diuretic, and heart stimulant. And similar to caffeine, it may be useful in management of fatigue and orthostatic hypotension.

defibrotide: approved biotech (0 associated side effects)

Defibrotide is used to treat or prevent a failure of normal blood flow (occlusive venous disease, OVD) in the liver of patients who have had bone marrow transplants or received certain drugs such as oral estrogens, mercaptopurine, and many others.

4-{2-[(7-amino-2-furan-2-yl[1,2,4]triazolo[1,5-a][1,3,5]triazin-5-yl)amino]ethyl}phenol: experimental small molecule (0 associated side effects)

213 known side effects mediated through drugs targeting this protein:

Abdominal discomfort Abdominal distension Abdominal pain  
Abdominal pain upper Abnormal dreams Acidosis Affect  
lability Aggression Agitation Agranulocytosis Albuminuria  
Alopecia Alopecia effluvium Anaemia Anaphylactic  
shock Anaphylactoid reaction Angina pectoris Angioedema  
Antidiuretic hormone abnormality Anxiety Aplastic anaemia  
Arrhythmia Arthralgia Asthenia Ataxia Atrial  
fibrillation Atrial tachycardia Back pain Blood  
antidiuretic hormone abnormal Blood creatinine increased Blood  
pressure increased Blood sodium increased Blood uric acid  
increased Body temperature increased Bradycardia Bronchospasm  
Burning sensation Cardiac arrest Cardiac fibrillation  
Cardiac flutter Cardio-respiratory arrest Cardiovascular  
disorder Cerebral haemorrhage Cerebrovascular accident Chest  
discomfort Chest pain Chills Cholecystitis Cholestasis  
Chronic obstructive pulmonary disease Clonic convulsion  
Completed suicide Confusional state Conjunctivitis  
Constipation Convulsion Coordination abnormal Deafness  
Death Decreased appetite Dermatitis Diarrhoea Discomfort  
Disorientation Disseminated intravascular coagulation  
Dizziness Drug interaction Dry mouth Dry skin Dysgeusia  
Dyspepsia Dyspnoea Ear pain Emotional disorder  
Encephalopathy Enterocolitis Epistaxis Eructation  
Erythema Erythema multiforme Extrasystoles  
Extravasation Fatigue Feeling abnormal Feeling jittery  
Flatulence Fluid overload Flushing Foetor hepaticus  
Gastritis Gastrointestinal haemorrhage Gastrointestinal pain  
Gastroesophageal reflux disease Grand mal convulsion  
Haematemesis Haematocrit decreased Haematuria  
Haemodynamic instability Haemoglobin Haemorrhage  
Hallucination Headache Hearing impaired Heart rate  
irregular Hepatic enzyme increased Hepatic failure Hepatitis  
Hepatobiliary disease Hepatocellular injury Hypercalcaemia  
Hyperglycaemia Hyperhidrosis Hypersensitivity  
Hypertension Hyperuricaemia Hyperventilation



Hypoaesthesia Hypoglycaemia Hypokalaemia Hypotension  
 Hypoxia Ill-defined disorder Immune system disorder  
 Impaired healing Inappropriate antidiuretic hormone secretion  
 Infection Infestation Influenza Insomnia Irritability  
 Jaundice Lacrimation increased Laryngitis Leukaemia  
 Leukocytosis Leukopenia Liver disorder Loss of  
 consciousness Malaise Memory impairment Meningitis Meningitis  
 aseptic Mood swings Muscle spasms Muscle twitching Muscular  
 weakness Musculoskeletal discomfort Musculoskeletal disorder  
 Myalgia Nasal congestion Nausea Necrotising colitis  
 Necrotising enterocolitis neonatal Nervous system disorder  
 Nervousness Neuropathy peripheral Oedema Oropharyngeal  
 discomfort Oropharyngeal pain Pain Palpitations  
 Pancytopenia Panic attack Panic reaction  
 Paraesthesia Phlebitis Pneumonia Poisoning Polyuria  
 Pruritus Pulmonary oedema Purpura Rash Renal failure  
 Respiratory disorder Retinal disorder Retinopathy of  
 prematurity Rhabdomyolysis Salivary hypersecretion Scotoma  
 Sensory loss Sepsis Shock Sinus tachycardia Skin  
 disorder Sleep disorder Somnolence Suicidal ideation  
 Supraventricular tachycardia Swelling Syncope Tachycardia  
 Tachypnoea Tenderness Tension Thirst Throat tightness  
 Thrombocytopenia Thrombosis Tinnitus Torsade de pointes  
 Tremor Urinary retention Urticaria Vascular purpura  
 Venous thrombosis Ventricular extrasystoles Ventricular  
 fibrillation Ventricular tachycardia Vertigo Vision  
 blurred Visual impairment Vomiting

\*\*\*\*\*  
 \*\*\*\*\*

Gamma-aminobutyric-acid receptor subunit alpha-3 - Group: Channel  
 Treated with:

- lorazepam: approved small molecule (126 associated side effects) For the management of anxiety disorders, and for treatment of status epilepticus.
- ethchlorvynol: illicit, approved small molecule (0 associated side effects) Used for short-term hypnotic therapy in the management of insomnia for periods of up to one week in duration; however, this medication generally has been replaced by other sedative-hypnotic agents.
- temazepam: approved small molecule (35 associated side effects) For the short-term treatment of insomnia (generally 7-10 days).
- butabarbital: illicit, approved small molecule (0 associated side effects) For short-term treatment of insomnia and anxiety disorders
- butalbital: illicit, approved small molecule (0 associated side effects) Used in combination with acetaminophen or aspirin and caffeine for its sedative and relaxant effects in the treatment of tension headaches, migraines, and pain.
- talbutal: illicit, approved small molecule (0 associated side effects) For use as a sedative and hypnotic.
- pentobarbital: approved small molecule (38 associated side effects) For the short-term treatment of insomnia.

clobazam: illicit,approved small molecule (58 associated side effects) For treatment and management of epilepsy and anxiety disorder.

meprobamate: illicit,approved small molecule (54 associated side effects) For the management of anxiety disorders or for the short-term relief of the symptoms of anxiety.

eszopiclone: approved small molecule (0 associated side effects) For the treatment of insomnia

alprazolam:illicit,approved small molecule (178 associated side effects) For the management of anxiety disorder or the short-term relief of symptoms of anxiety and for the treatment of panic disorder, with or without agoraphobia.

secobarbital: approved small molecule (38 associated side effects) For the Short-term treatment of intractable insomnia for patients habituated to barbiturates

zolpidem: approved small molecule (282 associated side effects) For the short-term treatment of insomnia.

metharbital: approved small molecule (0 associated side effects) Metharbital is used for the treatment of epilepsy.

chlordiazepoxide:illicit,approved small molecule (20 associated side effects) For the management of anxiety disorders or for the short-term relief of symptoms of anxiety, withdrawal symptoms of acute alcoholism, and preoperative apprehension and anxiety.

adinazolam: approved small molecule (0 associated side effects) For the treatment of anxiety and status epilepticus.

thiopental: approved small molecule (0 associated side effects) For use as the sole anesthetic agent for brief (15 minute) procedures, for induction of anesthesia prior to administration of other anesthetic agents, to supplement regional anesthesia, to provide hypnosis during balanced anesthesia with other agents for analgesia or muscle relaxation, for the control of convulsive states during or following inhalation anesthesia or local anesthesia, in neurosurgical patients with increased intracranial pressure, and for narcoanalysis and narcosynthesis in psychiatric disorders.

clorazepate: illicit,approved small molecule (0 associated side effects) For the management of anxiety disorders or for the short-term relief of the symptoms of anxiety. Also used as adjunctive therapy in the management of partial seizures and for the symptomatic relief of acute alcohol withdrawal.

midazolam: illicit,approved small molecule (119 associated side effects) For use as a sedative perioperatively.

flurazepam:illicit,approved small molecule (62 associated side effects) For short-term and intermittent use in patients with recurring insomnia and poor sleeping habits

primidone: approved small molecule (16 associated side effects) For the treatment of epilepsy

halazepam: illicit,approved small molecule (0 associated side effects) Used to relieve anxiety, nervousness, and tension associated with anxiety disorders.

diazepam: illicit,approved small molecule (149 associated side effects) Used in the treatment of severe anxiety disorders, as a hypnotic in the short-term management of insomnia, as a sedative and premedicant, as an anticonvulsant, and in the management of alcohol withdrawal syndrome.

oxazepam: approved small molecule (36 associated side effects)  
For the treatment of anxiety disorders and alcohol withdrawal.

methylphenobarbital: approved small molecule (37 associated side effects)  
For the relief of anxiety, tension, and apprehension, also used as an anticonvulsant for the treatment of epilepsy.

triazolam: illicit,approved,withdrawn small molecule (66 associated side effects)  
For the short-term treatment of insomnia.

clonazepam: illicit,approved small molecule (228 associated side effects)  
Used as an anticonvulsant in the treatment of the Lennox-Gastaut syndrome (petit mal variant), akinetic and myoclonic seizures.

flumazenil: approved small molecule (100 associated side effects)  
For the complete or partial reversal of the sedative effects of benzodiazepines in cases where general anesthesia has been induced and/or maintained with benzodiazepines, and where sedation has been produced with benzodiazepines for diagnostic and therapeutic procedures. Also for the management of benzodiazepine overdose as an adjunct for appropriate supportive and symptomatic measures.

estazolam: illicit,approved small molecule (131 associated side effects)  
For the short-term management of insomnia characterized by difficulty in falling asleep, frequent nocturnal awakenings, and/or early morning awakenings.

amobarbital: illicit,approved small molecule (0 associated side effects)

aprobarbital: illicit,approved small molecule (0 associated side effects)

butethal: illicit,approved small molecule (0 associated side effects)  
For the treatment of insomnia.

heptabarbital: approved small molecule (0 associated side effects)  
Used mainly for sedation and hypnosis.

hexobarbital: approved small molecule (0 associated side effects)  
For the induction of anesthesia prior to the use of other general anesthetic agents and for induction of anesthesia for short surgical, diagnostic, or therapeutic procedures associated with minimal painful stimuli.

barbituric acid derivative: illicit,experimental small molecule (0 associated side effects)

flunitrazepam: illicit,approved small molecule (0 associated side effects)  
For short-term treatment of severe insomnias, that are not responsive to other hypnotics.

bromazepam: illicit,approved small molecule (47 associated side effects)  
For the short-term treatment of insomnia, short-term treatment of anxiety or panic attacks, if a benzodiazepine is required, and the alleviation of the symptoms of alcohol- and opiate-withdrawal.

clotiazepam: illicit,approved small molecule (0 associated side effects)  
For the treatment of anxiety disorders.

fludiazepam: illicit,approved small molecule (0 associated side effects)  
Used for the short-term treatment of anxiety disorders.

prazepam: illicit,approved small molecule (0 associated side effects)  
For the treatment of anxiety disorders.

quazepam: illicit, approved small molecule (0 associated side effects) Used to treat insomnia.  
 cinolazepam: approved small molecule (0 associated side effects) For the management of anxiety disorders or for the short-term relief of the symptoms of anxiety or anxiety associated with depressive symptoms.

617 known side effects mediated through drugs targeting this protein:

Abdominal discomfort Abdominal distension Abdominal pain  
 Abdominal tenderness Abnormal dreams Abnormal faeces  
 Abscess Acidosis Acne Acute coronary syndrome  
 Affect lability Ageusia Aggression Agitation  
 Agranulocytosis Akathisia Akinesia Alanine  
 aminotransferase increased Alcohol poisoning Alopecia Altered  
 state of consciousness Amblyopia Amenorrhoea Amnesia Anaemia  
 Anaemia macrocytic Anaemia megaloblastic Anaphylactic  
 shock Anaphylactoid reaction Anger Angina pectoris Angioedema  
 Angiopathy Anorectal discomfort Anorectal disorder  
 Anterograde amnesia Anuria Anxiety Aortic dissection  
 Apathy Aphasia Aphonia Aplasia Aplastic anaemia  
 Apnoea Appetite disorder Arrhythmia Arterial spasm  
 Arteritis Arthralgia Arthritis Arthropathy Aspartate  
 aminotransferase increased Asphyxia Aspiration Asthenia  
 Asthenopia Asthma Ataxia Athetosis Atrioventricular  
 block Back pain Balance disorder Binge eating Bladder  
 dysfunction Bladder pain Blindness Blood alkaline phosphatase  
 increased Blood bilirubin increased Blood disorder Blood  
 glucose decreased Blood pressure increased Blood thromboplastin  
 decreased Blood urea increased Body temperature decreased Body  
 temperature increased Borderline personality disorder Bradycardia  
 Bradyphrenia Brain oedema Breast disorder Breast  
 engorgement Breast enlargement Breast feeding Breast neoplasm  
 Breast pain Breast swelling Breath odour Bronchitis  
 Bronchospasm Bulimia nervosa Burning sensation Bursitis  
 Candidiasis Carbon dioxide increased Cardiac arrest  
 Cardiac disorder Cardiac failure Cardio-respiratory arrest  
 Cardiovascular disorder Cellulitis Cerebellar syndrome  
 Cerebrovascular accident Cerebrovascular disorder Chest  
 discomfort Chest pain Chills Choking sensation Cholelithiasis  
 Chorea Chromaturia Clonic convulsion Clonus Clumsiness  
 Coagulopathy Cognitive disorder Colitis Coma  
 Completed suicide Confusional state Congenital skin disorder  
 Conjunctivitis Connective tissue disorder Constipation  
 Conversion disorder Convulsion Coordination abnormal Cough  
 Crying Cyanosis Cystitis Cystitis noninfective  
 Cytolytic hepatitis Deafness Death Decreased appetite  
 Dehydration Delirium Delirium tremens Delusion Dementia  
 Dental caries Dependence Depersonalisation Depressed level  
 of consciousness Depressed mood Depression Depressive symptom  
 Derealisation Dermatitis Dermatitis bullous Dermatitis  
 contact Dermatitis exfoliative Diarrhoea Diplopia Discomfort  
 Disinhibition Disorientation Disturbance in attention  
 Disturbance in sexual arousal Dizziness Dizziness  
 postural Drooling Drug abuse Drug dependence Drug eruption

Drug hypersensitivity Drug intolerance Drug withdrawal  
 convulsions Dry eye Dry mouth Dry skin Dry throat  
 Dysaesthesia Dysarthria Dysgeusia Dyskinesia  
 Dysmenorrhoea Dyspepsia Dysphagia Dysphonia Dysphoria  
 Dyspnoea Dysthymic disorder Dystonia Dysuria Ear  
 infection Ear pain Ecchymosis Eczema Effusion Ejaculation  
 delayed Ejaculation failure Elderly Embolism Emotional  
 disorder Emotional distress Emotional poverty Encephalopathy  
 Encopresis Endometrial sarcoma Energy increased Enteritis  
 Enterocolitis Enuresis Eosinophilia Epilepsy  
 Epistaxis Erectile dysfunction Eructation Erythema  
 Erythema multiforme Euphoric mood Extrapyrarnidal  
 disorder Extrasystoles Eye disorder Eye irritation Eye  
 movement disorder Eye pain Eye swelling Eyelid ptosis Face  
 oedema Faecal incontinence Fatigue Fear Feeling abnormal  
 Feeling cold Feeling drunk Feeling hot Feeling jittery  
 Feeling of body temperature change Fibroadenoma of breast Flat  
 affect Flatulence Floppy infant Flushing Frequent bowel  
 movements Fungal infection Furuncle Gait disturbance  
 Galactorrhoea Gangrene Gastric disorder Gastric ulcer  
 Gastritis Gastroenteritis Gastrointestinal disorder  
 Gastrointestinal haemorrhage Gastrointestinal pain  
 Gastrooesophageal reflux disease Gingival pain Glaucoma  
 Glossitis Glossodynia Gout Grand mal convulsion  
 Gynaecomastia Haematoma Haematuria Haemoglobin Haemoglobin  
 decreased Haemoglobinaemia Haemorrhage Haemorrhage urinary tract  
 Haemorrhoids Hallucination Hangover Headache  
 Hearing impaired Heart rate irregular Hemiparesis Hepatic  
 enzyme increased Hepatic failure Hepatic function abnormal  
 Hepatitis Hepatocellular injury Hepatomegaly Hernia  
 Herpes simplex Herpes virus infection Herpes zoster  
 Hiccups Hirsutism Homicidal ideation Hordeolum  
 Hostility Hot flush Hunger Hyperacusis Hyperaemia  
 Hyperaesthesia Hyperbilirubinaemia Hypercapnia  
 Hypercholesterolaemia Hyperglycaemia Hyperhidrosis  
 Hyperkinesia Hyperlipidaemia Hyperprolactinaemia  
 Hyperpyrexia Hypersensitivity Hypersomnia Hypertension  
 Hypertonia Hypertrophy Hyperventilation Hypoaesthesia  
 Hypochromic anaemia Hypokalaemia Hypokinesia Hypomania  
 Hyponatraemia Hypopnoea Hyporeflexia Hypotension  
 Hypothermia Hypotonia Hypoventilation Hypoxia Ill-defined  
 disorder Illusion Inappropriate antidiuretic hormone secretion  
 Incontinence Increased appetite Induration Infarction  
 Infection Infectious mononucleosis Infestation  
 Inflammation Influenza Influenza like illness Injection  
 site pain Injection site reaction Insomnia Intestinal  
 obstruction Intraocular pressure increased Iritis  
 Irritability Jaundice Joint swelling Laboratory test  
 abnormal Labyrinthitis Lacrimal disorder Lacrimation increased  
 Laryngitis Laryngospasm Lethargy Leukocytosis  
 Leukopenia Libido decreased Libido increased Liver disorder  
 Liver function test abnormal Liver injury Local reaction  
 Logorrhoea Loss of consciousness Loss of libido Lower  
 respiratory tract infection Lung disorder Lymphadenopathy Major  
 depression Malaise Mania Mastitis Mean arterial pressure

Mediastinal disorder Melaena Memory impairment Menopausal  
 symptoms Menorrhagia Menstrual disorder Menstruation irregular  
 Mental disability Mental disorder Mental retardation  
 Metrorrhagia Micturition urgency Migraine Miosis  
 Mood swings Motion sickness Mouth ulceration Movement disorder  
 Muscle contractions involuntary Muscle relaxant therapy  
 Muscle rigidity Muscle spasms Muscle spasticity Muscle  
 twitching Muscular weakness Musculoskeletal discomfort  
 Musculoskeletal disorder Musculoskeletal stiffness  
 Myalgia Mydriasis Myocardial infarction Myoclonus  
 Myopathy Nasal congestion Nasopharyngitis Nausea Neck  
 pain Necrosis Neoplasm Nephrolithiasis Nervous system  
 disorder Nervousness Neuralgia Neuritis Neuroleptic malignant  
 syndrome Neuropathy peripheral Neurosis Neutropenia Nightmare  
 Nocturia Nodal arrhythmia Nodal rhythm Nodule  
 Nuchal rigidity Nystagmus Obstruction Obstructive airways  
 disorder Ocular hyperaemia Oedema Oedema peripheral Oesophageal  
 spasm Oliguria Oropharyngeal pain Orthostatic hypotension  
 Osteoarthritis Osteomalacia Otitis externa Otitis  
 media Pain Pain in extremity Pain in jaw Pallor Palpitations  
 Pancytopenia Panic attack Panic disorder Panic  
 reaction Paraesthesia Paraesthesia oral Paralysis Paranoia  
 Paresis Parosmia Pelvic pain Penile discharge Pericardial  
 effusion Periorbital oedema Personality disorder Petechiae  
 Pheochromocytoma Pharyngitis Phlebitis Phobia Photophobia  
 Photopsia Photosensitivity reaction Pigmentation disorder  
 Platelet count decreased Pleurisy Pneumonia  
 Pneumothorax Pollakiuria Polyuria Post-traumatic stress  
 disorder Precocious puberty Premenstrual syndrome Presyncope  
 Proctalgia Proctitis Prothrombin level increased Pruritus  
 Psychiatric symptom Psychomotor retardation Psychotic  
 disorder Puberty Pulmonary congestion Pulmonary embolism  
 Pulmonary function test decreased Pulmonary haemorrhage  
 Pulmonary hypertension Pulmonary oedema Purpura non-  
 thrombocytopenic Pyelonephritis Rash Rash maculo-papular Rash  
 pustular Rectal haemorrhage Rectal tenesmus Red blood cell  
 sedimentation rate increased Renal failure acute Renal pain  
 Respiratory arrest Respiratory depression Respiratory  
 disorder Respiratory failure Respiratory moniliasis Respiratory  
 rate decreased Respiratory tract congestion Respiratory tract  
 infection Restless legs syndrome Retching Retrograde amnesia  
 Rhinitis allergic Rhinorrhoea Rhonchi Saliva altered  
 Salivary hypersecretion Sciatica Scleritis Scotoma  
 Sedation Sensation of heaviness Sexual dysfunction Shock  
 Sinus tachycardia Sinusitis Skin burning sensation Skin  
 discolouration Skin disorder Skin exfoliation Skin necrosis  
 Skin wrinkling Sleep apnoea syndrome Sleep disorder Sleep  
 talking Sluggishness Sneezing Somnambulism Somnolence  
 Speech disorder Stevens-Johnson syndrome Stomatitis  
 Strabismus Stress Stridor Stupor Substance abuse  
 Suicidal ideation Suicide attempt Swelling Swelling face  
 Swollen tongue Syncope Tachycardia Tachypnoea Tenderness  
 Tendonitis Tension Tetany Therapeutic response  
 decreased Thinking abnormal Thirst Throat irritation  
 Thrombocytopenia Thrombocytopenic purpura Thrombocytosis

Thrombophlebitis Thrombosis Thyroid neoplasm Tinnitus  
 Tongue coated Tongue disorder Tongue oedema Tooth  
 disorder Toothache Toxic epidermal necrolysis Transaminases  
 increased Tremor Tropical spastic paresis Ulcerative  
 keratitis Upper airway obstruction Upper respiratory tract  
 infection Urethral disorder Urethritis Urinary hesitation  
 Urinary incontinence Urinary retention Urinary tract disorder  
 Urinary tract infection Urine colour abnormal Urine  
 output increased Urticaria Uterine haemorrhage Uterovaginal  
 prolapse Vaginal discharge Vaginal haemorrhage Vaginal infection  
 Vaginal inflammation Varicose vein Vascular purpura  
 Vasodilation procedure Venous thrombosis Ventricular arrhythmia  
 Ventricular extrasystoles Ventricular tachycardia  
 Vertigo Vestibular disorder Viral infection Vision  
 blurred Visual acuity reduced Visual impairment Vomiting  
 Vulvovaginal disorder Weight decreased Weight increased  
 Wheezing Withdrawal syndrome Xeroderma Xerophthalmia  
 Yawning

\*\*\*\*\*  
 \*\*\*\*\*

Putative G-protein coupled receptor 44 - Group: Receptor

Treated with:

indomethacin: approved small molecule (164 associated side  
 effects) For moderate to severe rheumatoid arthritis including  
 acute flares of chronic disease, ankylosing spondylitis,  
 osteoarthritis, acute painful shoulder (bursitis and/or tendinitis)  
 and acute gouty arthritis.

sulindac: approved small molecule (148 associated side  
 effects) For acute or long-term use in the relief of signs and  
 symptoms of osteoarthritis, rheumatoid arthritis, ankylosing  
 spondylitis, acute painful shoulder (acute subacromial  
 bursitis/supraspinatus tendinitis), and acute gouty arthritis.

zomepirac: withdrawn small molecule (0 associated side effects)  
 Zomepirac was indicated for the management of mild to severe  
 pain.

217 known side effects mediated through drugs targeting this protein:

Abdominal discomfort Abdominal distension Abdominal pain upper  
 Acidosis Acute psychosis Ageusia Agranulocytosis  
 Alkalosis Alopecia Anaemia Anaphylactic shock  
 Angioedema Anorectal discomfort Anxiety Apathy  
 Aplastic anaemia Apnoea Arrhythmia Arthralgia Asthenia  
 Asthma Azotaemia Blood creatinine increased Blood  
 potassium increased Body temperature increased Bradycardia  
 Bronchospasm Cardiac failure Cardiac failure congestive  
 Cellulitis gangrenous Chest pain Chills Cholecystitis  
 Cholelithiasis Cholestasis Chromaturia Coagulopathy  
 Colitis Colitis ulcerative Coma Confusional state  
 Conjunctivitis Connective tissue disorder Constipation  
 Convulsion Corneal deposits Crohn's disease Crystal urine  
 Crystalluria Deafness Decreased appetite  
 Depersonalisation Depressed level of consciousness Dermatitis  
 Dermatitis exfoliative Diarrhoea Diplopia Discomfort  
 Disseminated intravascular coagulation Diverticulum

Dizziness Drug rash with eosinophilia and systemic symptoms  
 Dysarthria Dysgeusia Dyskinesia Dyspepsia Dyspnoea  
 Dysuria Ecchymosis Effusion Electrolyte imbalance  
 Enterocolitis Eosinophilia Epilepsy Epistaxis  
 Erythema Erythema multiforme Erythema nodosum Fasciitis  
 Fatigue Feeling abnormal Fibrosis Flat affect Flatulence  
 Fluid retention Flushing Gastric disorder Gastric  
 perforation Gastritis Gastroenteritis Gastrointestinal haemorrhage  
 Gastrointestinal pain Gastrointestinal perforation Glossitis  
 Glycosuria Gynaecomastia Haematuria Haemoglobin Haemolytic  
 anaemia Haemorrhage intracranial Headache Hearing impaired  
 Hepatic failure Hepatic function abnormal Hepatitis  
 Hyperglycaemia Hyperhidrosis Hyperkalaemia  
 Hypersensitivity Hypertension Hypertrophy Hypoglycaemia  
 Hyponatraemia Hypotension Ileitis Ileus Ill-defined  
 disorder Infection Insomnia Intestinal ulcer Jaundice  
 Leukaemia Leukocytoclastic vasculitis Leukocytosis  
 Leukopenia Loss of consciousness Lung infection  
 Lymphadenitis Macule Malaise Meningitis Meningitis  
 aseptic Mixed connective tissue disease Mouth ulceration  
 Muscle spasms Muscular weakness Musculoskeletal discomfort  
 Myalgia Nausea Necrotising colitis Necrotising  
 enterocolitis neonatal Necrotising fasciitis Neoplasm malignant  
 Nephritic syndrome Nephritis Nephrolithiasis Nephrotic  
 syndrome Nervousness Neuritis Neuropathy peripheral Neutropenia  
 Obstruction Oedema Oesophageal disorder Oliguria  
 Osteoarthritis Pain Palpitations Pancreatitis  
 Pancytopenia Paraesthesia Peptic ulcer Petechiae  
 Photosensitivity reaction Platelet aggregation decreased  
 Platelet count decreased Pleural disorder Pleural effusion  
 Pneumonia Pneumothorax Pollakiuria Proctalgia Proctitis  
 Protein urine present Proteinuria Prothrombin level increased  
 Pruritus Psychotic disorder Pulmonary haemorrhage  
 Pulmonary hypertension Pulmonary oedema Purpura Rash  
 Rectal haemorrhage Rectal tenesmus Renal failure Renal  
 impairment Retinal disorder Retinopathy of prematurity Shock Skin  
 exfoliation Somnolence Stomatitis Stupor Syncope Systemic  
 lupus erythematosus Tachycardia Tenderness Tension  
 Thrombocytopenia Thrombocytopenic purpura Thrombophlebitis  
 Tinnitus Toxic epidermal necrolysis Tubulointerstitial  
 nephritis Ulcer Urine colour abnormal Urine output Urticaria  
 Vaginal haemorrhage Vascular purpura Vasculitis Vertigo  
 Vision blurred Visual impairment Vomiting Weight increased

\*\*\*\*\*  
 \*\*\*\*\*

Nuclear receptor 0B1 - Group: Receptor

Treated with:

tretinoin: approved, nutraceutical small molecule (0 associated  
 side effects) For the the induction of remission in patients with  
 acute promyelocytic leukemia (APL), French-American-British (FAB)  
 classification M3 (including the M3 variant); For the topical  
 treatment of acne vulgaris, flat warts and other skin conditions  
 (psoriasis, ichthyosis congenita, ichthyosis vulgaris, lamellar  
 ichthyosis, keratosis palmaris et plantaris, epidermolytic  
 hyperkeratosis, senile comedones, senile keratosis, keratosis



follicularis (Darier's disease), and basal cell carcinomas.); For palliative therapy to improve fine wrinkling, mottled hyperpigmentation, roughness associated with photodamage. dexamethasone: approved small molecule (147 associated side effects)

147 known side effects mediated through drugs targeting this protein:

Abdominal distension Abscess sterile Acne Acute coronary syndrome Affect lability Alkalosis hypokalaemic Anaphylactic shock Anaphylactoid reaction Angioedema Arachnoiditis Arrhythmia Arthropathy Asthenia Atrophy Benign intracranial hypertension Bladder dysfunction Blindness Blister Bradycardia Calcinosis Carbohydrate tolerance decreased Cardiac arrest Cardiac failure Cardiac failure congestive Cardiomegaly Cardiomyopathy Cataract subcapsular Compression fracture Conjunctival haemorrhage Conjunctival hyperaemia Conjunctivitis Convulsion Cushing's syndrome Cushingoid Dermatitis Dermatitis acneiform Dermatitis bullous Dermatitis contact Diabetes mellitus Diplegia Discomfort Dissociation Dizziness Dry skin Ecchymosis Electrolyte imbalance Embolism Embolism venous Euphoric mood Exophthalmos Extravasation Eye infection Eye pain Fat embolism Feeling abnormal Fluid retention Folliculitis Gastrointestinal disorder Glaucoma Glucose tolerance impaired Glycosuria Haemoglobin Haemorrhage Headache Heat rash Hepatomegaly Herpes simplex Hiccups Hirsutism Hyperaemia Hyperglycaemia Hyperhidrosis Hypernatraemia Hypertension Hypertrichosis Hypertrophic cardiomyopathy Hypokalaemia Ill-defined disorder Impaired healing Increased appetite Infarction Infection Inflammatory bowel disease Insomnia Intracranial pressure increased Intraocular pressure increased Leukoderma Loss of consciousness Lupus miliaris disseminatus faciei Malaise Mass Menstruation irregular Monoplegia Mood swings Muscle mass Muscular weakness Myocardial infarction Myocardial rupture Myopathy Nausea Necrosis Neuritis Neuropathy peripheral Nitrogen balance negative Ocular hypertension Oesophagitis Oesophagitis ulcerative Optic nerve disorder Optic neuritis Osteoarthritis Osteonecrosis Osteoporosis Pain Pancreatitis Papilloedema Paraesthesia Paraparesis Paraplegia Pathological fracture Peptic ulcer Personality change Petechiae Premature baby Pruritus Psychotic disorder Pulmonary oedema Rash Rash follicular Retinal disorder Retinopathy of prematurity Scleral disorder Shock Skin atrophy Skin exfoliation Skin hyperpigmentation Skin striae Skin test positive Small for dates baby Syncope Tachycardia Telangiectasia Thrombophlebitis Urticaria Vasculitis Vertigo Vitreous detachment Weight increased

\*\*\*\*\*  
\*\*\*\*\*

Prostaglandin E2 receptor EP4 subtype - Group: Receptor  
Treated with:

dinoprostone: approved small molecule (0 associated side effects) For the termination of pregnancy during the second trimester (from the 12th through the 20th gestational week as calculated from the first day of the last normal menstrual period), as well as for evacuation of the uterine contents in the management of missed abortion or intrauterine fetal death up to 28 weeks of gestational age as calculated from the first day of the last normal menstrual period. Also used in the management of nonmetastatic gestational trophoblastic disease (benign hydatidiform mole). Other indications include improving the cervical inducibility (cervical "ripening") in pregnant women at or near term with a medical or obstetrical need for labor induction, and the management of postpartum hemorrhage.

misoprostol: approved small molecule (102 associated side effects)

102 known side effects mediated through drugs targeting this protein:

Abdominal pain Acute coronary syndrome Alopecia Anaemia  
 Anaphylactic shock Anorectal disorder Anxiety  
 Arrhythmia Arterial thrombosis Arthralgia Asthenia Back  
 pain Blindness Blood alkaline phosphatase increased Body  
 temperature increased Breast pain Bronchitis Bronchospasm  
 Cardiac enzymes increased Cerebrovascular accident Chest  
 pain Chills Confusional state Conjunctivitis Constipation  
 Deafness Dehydration Dermatitis Diarrhoea Dizziness  
 Dysgeusia Dysmenorrhoea Dyspepsia Dysphagia Dyspnoea  
 Dysuria Ear pain Embolism Epistaxis Erectile  
 dysfunction Fatigue Feeling abnormal Flatulence Gastrointestinal  
 disorder Gastrointestinal haemorrhage Gastrointestinal pain  
 Gastrooesophageal reflux disease Genital disorder female  
 Gingivitis Glycosuria Gout Haematuria Haemoglobin Haemorrhage  
 Headache Hyperhidrosis Hypersensitivity Hypertension  
 Hypotension Infarction Infection Inflammation  
 Inflammatory bowel disease Loss of consciousness Loss of  
 libido Menorrhagia Menstrual disorder Metrorrhagia  
 Muscle spasms Musculoskeletal discomfort Musculoskeletal  
 stiffness Myalgia Myocardial infarction Nausea Neuropathy  
 peripheral Neurosis Oedema Pain Pallor Phlebitis  
 Pneumonia Polyuria Pulmonary embolism Purpura Rash  
 Red blood cell sedimentation rate increased Respiratory tract  
 infection Shock Somnolence Syncope Thirst Thrombocytopenia  
 Thrombosis Tinnitus Upper respiratory tract infection  
 Urinary tract infection Urine output increased Vaginal  
 haemorrhage Vascular purpura Visual acuity reduced Visual impairment  
 Vomiting

\*\*\*\*\*  
 \*\*\*\*\*

Interleukin-11 receptor alpha chain - Group: Receptor

Treated with:

oprelvekin: approved biotech (0 associated side effects)  
 Increases reduced platelet levels due to chemotherapy

known side effects mediated through drugs targeting this protein:

\*\*\*\*\*  
\*\*\*\*\*

Voltage-dependent L-type calcium channel subunit beta-4 - Group:  
Channel

Treated with:

nimodipine: approved small molecule (47 associated side effects)

For use as an adjunct to improve neurologic outcome following subarachnoid hemorrhage (SAH) from ruptured intracranial berry aneurysms by reducing the incidence and severity of ischemic deficits.

verapamil: approved small molecule (113 associated side effects) For the treatment of hypertension, angina, and cluster headache prophylaxis.

mibefradil: withdrawn small molecule (0 associated side effects) For the treatment of angina and high blood pressure.

139 known side effects mediated through drugs targeting this protein:

Abdominal discomfort Acne Acute coronary syndrome Alanine aminotransferase increased Alopecia Anaemia Anaphylactic shock Angioedema Arthralgia Asthenia Atrioventricular block Atrioventricular block complete Atrioventricular dissociation Balance disorder Blindness Blood alkaline phosphatase increased Blood lactate dehydrogenase increased Blood prolactin increased Blood urea increased Bradycardia Bronchospasm Cardiac failure Cardiac failure congestive Cardiomyopathy Cerebrovascular accident Chest pain Cholestasis Confusional state Constipation Convulsion Deep vein thrombosis Depressive symptom Dermatitis Diarrhoea Diplopia Discomfort Disseminated intravascular coagulation Dissociation Dizziness Dry mouth Dyspepsia Dyspnoea Ecchymosis Electrocardiogram abnormal Erectile dysfunction Erythema Erythema multiforme Extrapyrmidal disorder Fasting Fatigue Feeling abnormal Feeling cold Fluid retention Flushing Galactorrhoea Gastrointestinal disorder Gastrointestinal haemorrhage Gingival hyperplasia Gynaecomastia Haematoma Headache Hepatic enzyme increased Hepatic function abnormal Hepatitis Hyperhidrosis Hyperkeratosis Hyperplasia Hyperprolactinaemia Hypersensitivity Hypertension Hypertrophic cardiomyopathy Hypertrophy Hypoaesthesia Hyponatraemia Hypotension Ileus paralytic Infection Influenza Insomnia Intermittent claudication Jaundice Joint swelling Laryngospasm Lethargy Liver function test abnormal Loss of consciousness Macule Muscle fatigue Muscle spasms Muscular weakness Musculoskeletal discomfort Myalgia Myocardial infarction Nausea Nystagmus Oedema Oedema peripheral Oligomenorrhoea Orthostatic hypotension Pain Palpitations Paraesthesia Paralysis Pharyngitis Platelet count decreased Pollakiuria Pruritus Pulmonary oedema Purpura Quadriparesis Rash Rash maculo-papular Respiratory failure Respiratory tract infection Rhinitis Sensory loss Shock Sinus arrest Sinusitis Sleep disorder Somnolence Syncope Tachycardia Thrombocytopenia Thrombosis Tinnitus Tremor Upper respiratory tract

infection Urticaria Vascular purpura Vasculitis Vasospasm  
Venous thrombosisVertigo Vision blurred Visual acuity  
reduced Visual impairmentVomiting Wheezing  
\*\*\*\*\*  
\*\*\*\*\*

Neuronal acetylcholine receptor subunit alpha-10 - Group: Channel  
Treated with:

nicotine: approved small molecule (98 associated side effects)  
For the relief of nicotine withdrawal symptoms and as an aid  
to smoking cessation.

succinylcholine: approved small molecule (27 associated side  
effects) Used in surgical procedures where a rapid onset and brief  
duration of muscle relaxation is needed (includes intubation,  
endoscopies, and ECT)

methadone: approved small molecule (87 associated side effects)  
For the treatment of dry cough, drug withdrawal syndrome,  
opioid type drug dependence, and pain.

galantamine: approved small molecule (160 associated side  
effects) For the treatment of mild to moderate dementia of the  
Alzheimer's type. Has also been investigated in patients with mild  
cognitive impairment who did not meet the diagnostic criteria for  
Alzheimer's disease.

pentolinium: approved small molecule (0 associated side  
effects) Used to produce controlled hypotension during surgical  
procedures and in hypertensive crises.

trimethaphan: approved small molecule (0 associated side  
effects) For the controlled reduction of blood pressure during  
surgery and in the treatment of hypertensive emergencies.

chloroprocaine: approved small molecule (34 associated side  
effects) For the production of local anesthesia by infiltration  
and peripheral nerve block. They are not to be used for lumbar or  
caudal epidural anesthesia.

258 known side effects mediated through drugs targeting this  
protein:

Abdominal discomfort Abdominal pain Acidosis Acne Affect  
lability Aggression Agitation Amenorrhoea Amnesia Anaemia  
Analgesic therapyAnaphylactic shock Anaphylactoid reaction  
Angioedema Anxiety Apathy Aphasia Apnoea  
Apraxia Arachnoiditis Arrhythmia Arrhythmia  
supraventricular Arthralgia Arthritis Asthenia Ataxia  
Atrial fibrillation Atrioventricular block Back pain  
Bladder pain Blindness Blister Blood alkaline  
phosphatase increased Blood urea increased Body temperature  
increased Bone pain Bradycardia Bronchitis Bronchospasm  
Bundle branch block Cardiac arrest Cardiac failure  
Cardiac fibrillation Cardiomyopathy Cardiovascular  
disorder Cataract Cerebrovascular accident Cerebrovascular  
disorder Chest discomfort Chest pain Chronic hepatitis  
Coagulopathy Completed suicideConfusional state  
Constipation Convulsion Coordination abnormal Cough  
Cystitis Cystitis noninfective Death Decreased appetite  
DehydrationDelirium Dependence Depression Dermatitis  
Dermatitis bullous Diarrhoea Discomfort Disorientation  
Disturbance in attention Disturbance in sexual arousal

Diverticulitis Dizziness Drug abuse Drug dependence Dry  
 mouth Dysgeusia Dysmenorrhoea Dyspepsia Dysphagia Dysphonia  
 Dysphoria Dyspnoea Ear pain Electrocardiogram QT  
 prolonged Electrocardiogram T wave inversion Epistaxis Erythema  
 Euphoric mood Extrasystoles Eye disorder Eye  
 irritation Fatigue Feeling abnormal Feeling cold Flat affect  
 Flatulence Flushing Gastric disorder Gastritis  
 Gastroenteritis Gastrointestinal haemorrhage Gastrointestinal  
 pain Glossitis Gravitational oedema Haematuria Haemoglobin  
 Haemorrhage Hallucination Headache Hepatic enzyme  
 increased Hepatitis Hepatobiliary disease Hiccups  
 Hyperglycaemia Hyperhidrosis Hyperkalaemia  
 Hyperkinesia Hypersensitivity Hypersomnia Hypertension  
 Hyperthermia Hyperthermia malignant Hypertonia  
 Hypoaesthesia Hypokalaemia Hypokinesia Hypomagnesaemia  
 Hypotension Ill-defined disorder Immune system disorder  
 Incontinence Increased appetite Increased bronchial  
 secretion Infarction Infection Influenza Insomnia Intraocular  
 pressure increased Irritability Ischaemia Lacrimation  
 increased Laryngeal oedema Lethargy Libido decreased Libido  
 increased Liver disorder Loss of consciousness Lower  
 gastrointestinal haemorrhage Malaise Melaena Menstrual  
 disorder Mental disability Mental disorder Migraine Mood swings  
 Muscle contractions involuntary Muscle rigidity Muscle  
 spasms Muscle twitching Musculoskeletal discomfort  
 Musculoskeletal disorder Myalgia Mydriasis Myocardial  
 ischaemia Nasal congestion Nasal discomfort Nasal ulcer  
 Nasopharyngitis Nausea Nephrolithiasis Nervous system  
 disorder Nervousness Neuropathy peripheral Nightmare Nocturia  
 Oedema Oedema peripheral Oesophageal disorder Oesophageal  
 perforation Orthostatic hypotension Pain Pain in extremity Pain  
 in jaw Palpitations Paraesthesia Paranoia Pharyngitis  
 Phlebitis Pneumonia Pollakiuria Pruritus  
 Pseudocholinesterase deficiency Pulmonary function test  
 decreased Pulmonary oedema Purpura Rash Rectal haemorrhage  
 Renal failure acute Respiratory arrest Respiratory  
 depression Respiratory disorder Respiratory tract infection  
 Rhabdomyolysis Rhinitis Rhinorrhoea Salivary  
 hypersecretion Sedation Sensory loss Shock Sinusitis Sleep  
 disorder Sneezing Social avoidant behaviour Somnolence  
 Sputum increased Stomatitis Suicidal ideation Suicide attempt  
 Supraventricular tachycardia Swelling Syncope Tachycardia  
 Tension Thought blocking Throat irritation Thrombocytopenia  
 Thrombocytosis Tinnitus Tobacco user Tooth disorder  
 Torsade de pointes Transient ischaemic attack Tremor  
 Ulcer Upper respiratory tract infection Urethral disorder  
 Urinary hesitation Urinary incontinence Urinary retention  
 Urinary tract disorder Urinary tract infection Urticaria  
 Vascular dementia Vascular purpura Ventricular fibrillation  
 Ventricular tachycardia Vertigo Vision blurred  
 Visual acuity reduced Visual impairment Vomiting Weight  
 decreased Weight increased Withdrawal syndrome Yawning

\*\*\*\*\*  
 \*\*\*\*\*

Sodium channel protein type 5 subunit alpha - Group: Channel

Treated with:

idecainide: approved small molecule (0 associated side effects) For the treatment of life-threatening dysrhythmias and sustained ventricular tachycardia.

ranolazine: approved small molecule (63 associated side effects) For the treatment of chronic angina. It should be used in combination with amlodipine, beta-blockers or nitrates.

phenytoin: approved small molecule (247 associated side effects) For the control of generalized tonic-clonic (grand mal) and complex partial (psychomotor, temporal lobe) seizures and prevention and treatment of seizures occurring during or following neurosurgery.

disopyramide: approved small molecule (85 associated side effects) For the treatment of documented ventricular arrhythmias, such as sustained ventricular tachycardia, ventricular pre-excitation and cardiac dysrhythmias. It is a Class Ia antiarrhythmic drug.

lidocaine: approved small molecule (120 associated side effects) For production of local or regional anesthesia by infiltration techniques such as percutaneous injection and intravenous regional anesthesia by peripheral nerve block techniques such as brachial plexus and intercostal and by central neural techniques such as lumbar and caudal epidural blocks.

mexiletine: approved small molecule (101 associated side effects) For the treatment of ventricular tachycardia and symptomatic premature ventricular beats, and prevention of ventricular fibrillation.

hexylcaine: approved small molecule (0 associated side effects) Used as a local anesthetic for surface application, infiltration or nerve block

dibucaine: approved small molecule (0 associated side effects) For production of local or regional anesthesia by infiltration techniques such as percutaneous injection and intravenous regional anesthesia by peripheral nerve block techniques such as brachial plexus and intercostal and by central neural techniques such as lumbar and caudal epidural blocks.

mephenytoin: approved small molecule (58 associated side effects) For the treatment of refractory partial epilepsy.

carbamazepine: approved small molecule (231 associated side effects) For the treatment of epilepsy and pain associated with true trigeminal neuralgia.

verapamil: approved small molecule (113 associated side effects) For the treatment of hypertension, angina, and cluster headache prophylaxis.

moricizine: approved small molecule (111 associated side effects) Used to treat irregular heartbeats (arrhythmias) and maintain a normal heart rate.

riluzole: approved small molecule (437 associated side effects) For the treatment of amyotrophic lateral sclerosis (ALS, Lou Gehrig's Disease)

prilocaine: approved small molecule (37 associated side effects) Used as a local anaesthetic and is often used in dentistry.

ethotoin: approved small molecule (26 associated side effects) For the control of tonic-clonic (grand mal) and complex partial (psychomotor) seizures.

oxcarbazepine: approved small molecule (241 associated side effects) For use as monotherapy or adjunctive therapy in the treatment of partial seizures in adults with epilepsy and as adjunctive therapy in the treatment of partial seizures in children ages 4-16 with epilepsy.

benzonatate: approved small molecule (29 associated side effects) For the symptomatic relief of cough. Has also been applied locally in the oral cavity in adults by releasing the drug from the liquid-filled capsules to provide oropharyngeal anesthesia for conscious intubation.

cocaine: illicit, approved small molecule (13 associated side effects) For the introduction of local (topical) anesthesia of accessible mucous membranes of the oral, laryngeal and nasal cavities.

quinidine: approved small molecule (146 associated side effects) For the treatment of ventricular pre-excitation and cardiac dysrhythmias

zonisamide: approved small molecule (190 associated side effects) For use as adjunctive treatment of partial seizures in adults with epilepsy.

procainamide: approved small molecule (55 associated side effects) For the treatment of life-threatening ventricular arrhythmias.

tocainide: approved small molecule (0 associated side effects)  
For the treatment of documented ventricular arrhythmias, such as sustained ventricular tachycardia, that, in the judgment of the physician, are life-threatening.

propafenone: approved small molecule (283 associated side effects) Used to prolong the time to recurrence of paroxysmal atrial fibrillation/flutter (PAF) associated with disabling symptoms in patients without structural heart disease. Also used for the treatment of life-threatening documented ventricular arrhythmias, such as sustained ventricular tachycardia.

flecainide: approved small molecule (131 associated side effects) Flecainide is a class Ic antiarrhythmic agent and as such, it is used for the prevention of paroxysmal supraventricular tachycardias (PSVT), including atrioventricular nodal reentrant tachycardia, atrioventricular reentrant tachycardia and other supraventricular tachycardias of unspecified mechanism associated with disablin.

encainide: approved, withdrawn small molecule (0 associated side effects) Encainide is a class Ic antiarrhythmic agent which was used for management of irregular heartbeats, such as atrial fibrillation, atrial flutter, ventricular tachycardia, and ventricular fibrillation.

fosphenytoin: approved small molecule (200 associated side effects) For the control of generalized convulsive status epilepticus and prevention and treatment of seizures occurring during neurosurgery. It can also be substituted, short-term, for oral phenytoin.

quinidine barbiturate: approved small molecule (0 associated side effects)

ajmaline: approved small molecule (0 associated side effects)  
For use as an antiarrhythmic agent.

aprindine: approved small molecule (0 associated side effects)

857 known side effects mediated through drugs targeting this protein:

Abdominal discomfort    Abdominal distension    Abdominal pain  
Abdominal pain lower    Abdominal pain upper    Abnormal dreams  
Abscess    Accommodation disorder    Acidosis    Acne    Acute  
coronary syndrome    Acute psychosis    Acute yellow liver atrophy  
Adverse reaction    Affect lability    Ageusia    Aggression  
Agitation    Agranulocytosis    Akathisia    Alanine  
aminotransferase increased    Albuminuria    Alcohol poisoning    Alkalosis  
Alopecia    Altered state of consciousness    Alveolitis  
allergic    Amblyopia    Amenorrhoea    Amnesia    Anaemia    Anaemia  
macrocytic    Anaemia megaloblastic    Anaphylactic shock  
Anaphylactoid reaction    Angina pectoris    Angina unstable  
Angioedema    Angiopathy    Anorectal discomfort    Anorectal  
disorder    Anterior spinal artery syndrome    Antinuclear antibody  
positive    Anuria    Anxiety    Aortic dissection    Apathy  
Aphasia    Aplasia pure red cell    Aplastic anaemia    Apnoea  
Arachnoiditis    Arrhythmia    supraventricular    Arterial disorder  
Arterial insufficiency    Arterial occlusive disease    Arthralgia  
Arthritis    Arthropathy    Aspartate aminotransferase increased  
Aspiration    Assisted fertilisation    Asterixis    Asthenia  
Asthma    Ataxia    Atelectasis    Atrial fibrillation  
Atrial flutter    Atrial hypertrophy    Atrioventricular block  
Atrioventricular block complete    Atrioventricular block first  
degree    Atrioventricular block second degree    Atrioventricular  
dissociation    Atrophy    Aura    Azotaemia    Back pain    Balance  
disorder    Biliary colic    Bipolar I disorder    Bipolar disorder  
Bladder pain    Bleeding time prolonged    Blepharitis  
Blindness    Blister    Blood alkaline phosphatase increased  
Blood bilirubin abnormal    Blood bilirubin increased    Blood  
creatinine increased    Blood disorder    Blood glucose increased  
Blood lactate dehydrogenase increased    Blood osmolarity    Blood  
potassium decreased    Blood pressure increased    Blood prolactin  
increased    Blood thyroid stimulating hormone increased    Blood urea  
increased    Body temperature decreased    Body temperature increased  
Bone disorder    Bone neoplasm    Bradycardia    Brain hypoxia  
Brain oedema    Breast abscess    Breast disorder    Breast pain  
Breath odour    Breath sounds abnormal    Bronchitis  
Bronchospasm    Bundle branch block    Bundle branch block  
left    Bundle branch block    right    Burning sensation    Bursitis  
Cachexia    Calculus bladder    Cancer in remission    Candidiasis  
Cardiac arrest    Cardiac death    Cardiac disorder    Cardiac  
failure    Cardiac failure congestive    Cardiac fibrillation  
Cardiac flutter    Cardiac murmur    Cardiac output decreased  
Cardiogenic shock    Cardiomegaly    Cardiomyopathy    Carotid  
bruit    Cataract    Cauda equina syndrome    Cellulitis    Cerebellar  
syndrome    Cerebral artery embolism    Cerebral haematoma  
Cerebral haemorrhage    Cerebral infarction    Cerebral  
ischaemia    Cerebrovascular accident    Cheilitis    Chest pain  
Chills    Choking    Cholangitis    Cholecystitis  
Cholelithiasis    Cholestasis    Chorea    Choreoathetosis  
Chromaturia    Chronic obstructive pulmonary disease    Clonic  
convulsion    Coagulopathy    Cognitive disorder    Colitis  
Collagen-vascular disease    Coma    Completed suicide    Condition



aggravated Conduction disorder Confusional state Congenital  
 anomaly Congenital central nervous system anomaly Congenital  
 foot malformation Congestive cardiomyopathy Conjunctival  
 haemorrhage Conjunctival hyperaemia Conjunctivitis Connective  
 tissue disorder Constipation Conversion disorder Convulsion  
 Coombs direct test positive Coordination abnormal Cor  
 pulmonale Coronary artery disease Costochondritis Cough  
 Cranial nerve paralysis Cryptococcosis Cutaneous  
 vasculitis Cyanosis Cyst Cytolytic hepatitis Deafness Death  
 Decreased appetite Deficiency anaemia Dehydration  
 Delirium Delusion Dementia Dental caries  
 Depersonalisation Depressed level of consciousness Depression  
 Depressive symptom Dermatitis Dermatitis bullous  
 Dermatitis contact Dermatitis exfoliative Developmental  
 delay Device capturing issue Diabetes insipidus Diabetes mellitus  
 Diabetic ketoacidosis Diarrhoea Diplegia Diplopia  
 Discomfort Disease progression Disorientation  
 Disseminated intravascular coagulation Dissociation  
 Disturbance in attention Disturbance in sexual arousal  
 Dizziness Drug eruption Drug interaction Drug level  
 increased Drug rash with eosinophilia and systemic symptoms Dry  
 eye Dry mouth Dry skin Dry throat Duodenal ulcer Duodenitis  
 Dysarthria Dysgeusia Dyskinesia Dysmenorrhoea Dyspepsia  
 Dysphagia Dysphonia Dysplasia Dyspnoea Dystonia  
 Dysuria Ear infection Ear pain Ecchymosis Eczema  
 Effusion Electrocardiogram QRS complex Electrocardiogram  
 QT prolonged Electrocardiogram abnormal Electrocardiogram  
 normal Electroencephalogram abnormal Embolism Embolism  
 arterial Embolism venous Emotional disorder Emotional  
 distress Encephalitis Encephalopathy Endocrine disorder  
 Endophthalmitis Enteritis Enterocolitis Enuresis  
 Enzyme induction Eosinophil count increased Eosinophilia  
 Eosinophilic pneumonia Epilepsy Epistaxis Erectile  
 dysfunction Eructation Erythema Erythema multiforme Erythema  
 nodosum Euphoric mood Exomphalos Extensor plantar response  
 Extrapyrmidal disorder Extrasystoles Extravasation  
 Eye disorder Eye haemorrhage Eye inflammation Eye  
 irritation Eye oedema Eye pain Eyelid ptosis Face oedema  
 Faecal incontinence Faecalith Faecaloma Fall Fatigue  
 Feeling abnormal Feeling cold Feeling drunk Feeling hot  
 Fibrosis Flank pain Flat affect Flatulence Fluid overload  
 Fluid retention Flushing Folate deficiency Folliculitis  
 Fungal skin infection Furuncle Gait disturbance  
 Galactorrhoea Gamma-glutamyltransferase increased  
 Gastric cancer Gastric disorder Gastric ulcer Gastritis  
 Gastroenteritis Gastrointestinal disorder Gastrointestinal  
 dysplasia Gastrointestinal haemorrhage Gastrointestinal pain  
 Gastrointestinal tract irritation Gastrooesophageal reflux  
 disease Generalised oedema Genital discharge Gingival bleeding  
 Gingival hyperplasia Gingival hypertrophy Gingival pain  
 Gingivitis Glaucoma Glossitis Glossodynia Glycosuria Gout  
 Granuloma skin Granulomatous liver disease Gynaecomastia  
 Haematemesis Haematochezia Haematoma Haematuria  
 Haemoglobin Haemoglobin decreased Haemoglobinuria Haemolytic  
 anaemia Haemolytic uraemic syndrome Haemoptysis Haemorrhage

Haemorrhoids      Hallucination      Hallucination, visual  
 Headache      Hearing impaired      Heart rate irregular      Heart  
 sounds abnormal      Heat rash      Hemianopia      Hemiplegia      Hepatic enzyme  
 increased      Hepatic failure      Hepatic function abnormal      Hepatic  
 necrosis      Hepatitis      Hepatitis B      Hepatitis cholestatic      Hepatitis  
 fulminant      Hepatobiliary disease      Hepatocellular injury  
 Hepatomegaly      Hepatosplenomegaly      Hereditary disorder  
 Hernia      Herpes virus infection      Herpes zoster      Hiccups  
 Hirsutism      Hormone level abnormal      Hostility      Hot flush  
 Hyperacusis      Hyperaemia      Hyperaesthesia      Hyperamylasaemia  
 Hypercalcaemia      Hypercholesterolaemia  
 Hypergammaglobulinaemia      Hyperglycaemia      Hyperhidrosis  
 Hyperkalaemia      Hyperkeratosis      Hyperkinesia  
 Hyperlactacidaemia      Hyperlipidaemia      Hyperplasia  
 Hyperprolactinaemia      Hyperreflexia      Hypersensitivity  
 Hypertension      Hypertensive crisis      Hyperthermia  
 Hypertonia      Hypertrichosis      Hypertrophic cardiomyopathy  
 Hypertrophy      Hyperventilation      Hypoaesthesia      Hypoaesthesia  
 oral      Hypocalcaemia      Hypochromic anaemia      Hypoglycaemia  
 Hypokalaemia      Hypokinesia      Hypomagnesaemia      Hyponatraemia  
 Hypophosphataemia      Hypoprothrombinaemia      Hyporeflexia  
 Hypotension      Hypothermia      Hypothyroidism      Hypotonia  
 Hypoventilation      Hypoxia      Idiopathic thrombocytopenic  
 purpura      Ileus      Ileus paralytic      Ill-defined disorder      Immune  
 system disorder      Immunodeficiency      Impaired gastric emptying  
 Impetigo      Inappropriate antidiuretic hormone secretion  
 Incontinence      Increased appetite      Increased bronchial  
 secretion      Infarction      Infection      Infection parasitic      Infestation  
 Inflammation      Influenza      Influenza like illness      Injection  
 site reaction      Insomnia      Intermittent claudication  
 Interstitial lung disease      Intestinal functional disorder  
 Intestinal obstruction      Intracranial pressure increased  
 Intraocular pressure increased      Iritis      Iron deficiency  
 Iron deficiency anaemia      Irritability      Ischaemia  
 Jaundice      Jaundice cholestatic      Jaundice hepatocellular  
 Joint swelling      Ketoacidosis      Ketonuria      Ketosis  
 Lactic acidosis      Laryngeal oedema      Laryngitis      Laryngospasm  
 Leiomyoma      Lens disorder      Lenticular opacities      Lethargy  
 Leukocytosis      Leukoderma      Leukopenia      Libido decreased  
 Libido increased      Lip swelling      Liver function test abnormal  
 Liver injury      Lobar pneumonia      Local reaction      Logorrhoea  
 Loss of consciousness      Lung disorder      Lung infiltration      Lung  
 neoplasm malignant      Lymphadenopathy      Lymphoma      Lymphopenia  
 Macrocytosis      Macule      Maculopathy      Major depression  
 Malaise      Mania      Mastitis      Mediastinal disorder      Melaena  
 Memory impairment      Meningism      Meningitis      Meningitis aseptic  
 Menopausal symptoms      Menorrhagia      Mental disability      Mental  
 disorder      Mesenteric occlusion      Metabolic acidosis  
 Methaemoglobinaemia      Metrorrhagia      Microcytic anaemia  
 Micturition disorder      Micturition urgency      Migraine  
 Miosis      Monocyte count increased      Monocytosis      Monoplegia  
 Mood swings      Mouth ulceration      Movement disorder      Mucous membrane  
 disorder      Muscle atrophy      Muscle contractions involuntary  
 Muscle fatigue      Muscle relaxant therapy      Muscle rigidity  
 Muscle spasms      Muscle twitching      Muscular weakness

Musculoskeletal discomfort    Musculoskeletal pain  
Musculoskeletal stiffness    Myalgia    Myasthenia gravis  
Mydriasis    Myelofibrosis    Myeloid metaplasia    Myocardial  
depression    Myocardial infarction    Myocardial ischaemia    Myoclonus  
Myopathy    Nail disorder    Nasal congestion    Nasal dryness  
Nausea    Neck pain    Necrosis    Neoplasm    Neoplasm  
malignant    Nephritis    Nephrolithiasis    Nephropathy    toxicNephrotic  
syndrome    Nerve root lesion    Nervous system disorder    Nervousness  
Neuralgia    Neuritis    Neurodermatitis    Neuroleptic malignant  
syndrome    Neuropathy peripheral    Neurosis    Neutropenia    Night  
blindness    Nightmare    Nocturia    Nodal arrhythmia    Nodal rhythm  
Nodule    Normochromic normocytic anaemia    Nuchal rigidity  
Nystagmus    Obstruction    Oculogyric crisis    Oedema    Oedema  
genital    Oedema peripheral    Oesophageal disorder    Oesophageal  
stenosis    Oesophageal ulcer    Oesophagitis    Oligomenorrhoea  
Oliguria    Optic nerve disorder    Optic neuritis    Oral  
candidiasis    Oropharyngeal discomfort    Oropharyngeal pain  
Orthostatic hypotension    Osteoarthritis    Osteomalacia  
Osteonecrosis    Osteoporosis    Otitis externa    Pain    Pain  
in extremity    Pain in jaw    Pallor    Palpitations    Pancreatic  
disorder    Pancreatitis    Pancreatitis acute    Pancytopenia  
Panic disorder    Panic reaction    Panophthalmitis    Papule  
Paraesthesia    Paraesthesia oral    Paralysis    Paranoia  
Paraplegia    Parathyroid disorder    Paresis    Parosmia  
Pelvic pain    Pemphigoid    Peptic ulcer    Pericarditis  
Peripheral coldness    Peripheral embolism    Peripheral  
ischaemia    Peripheral vascular disorder    Peritonitis    Personality  
disorder    Petechiae    Pharyngitis    Phlebitis    Phobia    Photophobia  
Photosensitivity reaction    Pigmentation disorder    Plasmodium  
falciparum infection    Platelet count decreased    Pleural disorder  
Pleural effusion    Pleurisy    Pneumonia aspiration  
Pneumothorax    Poisoning    Pollakiuria    Polyarteritis nodosa  
Polyarthritits    Polyneuropathy    Polyp    Polyuria    Porphyria  
Porphyria acute    Porphyria non-acute    Postmenopausal  
haemorrhage    Presyncope    Priapism    Proctalgia    Proctitis    Prostate  
cancer    Prostatic disorder    Prostatism    Protein urine present  
Proteinuria    Prothrombin level increased    Prothrombin time  
shortened    Pruritus    Pruritus genital    Pseudolymphoma  
Pseudomembranous colitis    Psoriasis    Psychiatric symptom  
Psychotic disorder    Pulmonary congestion    Pulmonary  
embolism    Pulmonary fibrosis    Pulmonary function test decreased  
Pulmonary oedema    Pulmonary toxicity    Pulse abnormal  
Purpura    Pyelonephritis    Pyuria    Quadripareisis  
Radial nerve palsy    Radiculopathy    Rales    Rash    Rash  
erythematous    Rash generalised    Rash maculo-papular    Rash  
morbilliform    Rash pustular    Rectal haemorrhage    Rectal  
tenesmus    Red blood cell count decreased    Reflexes abnormal  
Regressive behaviour    Renal failure    Renal failure acute  
Renal impairment    Renal pain    Renal tubular disorder    Respiratory  
acidosis    Respiratory arrest    Respiratory depression    Respiratory  
disorder    Respiratory distress    Respiratory failure    Respiratory  
moniliasis    Respiratory paralysis    Respiratory tract congestion  
Respiratory tract infection    Retching    Reticulocytosis  
Retinal disorder    Retinitis pigmentosa    Rhabdomyolysis  
Rheumatoid arthritis    Rhinitis    Salivary hypersecretion

Schizophreniform disorder    Sciatica    Scotoma    Seborrhoeic  
 dermatitis Sedation    Sensitisation    Sensory disturbance  
 Sensory loss    Sepsis    Shock Sialoadenitis    Sicca  
 syndrome    Sick sinus syndrome    Sinoatrial block Sinus arrest  
 Sinus arrhythmia Sinus bradycardiaSinusitis    Skin candida  
 Skin discolouration    Skin disorder    Skin exfoliation Skin  
 mass Skin ulcer Sleep disorder    Sneezing    Social avoidant  
 behaviour    Somnolence Speech disorder    Spleen disorder  
 Splenomegaly    Sputum increased Status epilepticus  
 Stevens-Johnson syndrome    Stomatitis Stridor    Stupor  
 Subarachnoid haemorrhage    Subdural haematoma    Sudden  
 death Sudden visual loss    Suicidal ideationSuicide attempt  
 Supraventricular extrasystoles    Supraventricular tachycardia  
 Swelling    Syncope    Systemic lupus erythematosus Tachycardia  
 Talipes    Temperature intolerance    Tenderness Tendonitis  
 Tension    Testicular atrophy    Tetany    Thinking abnormal  
 Thirst    Thought blocking Throat tightness Thrombocytopenia  
 Thrombocytopenic purpura    Thrombophlebitis Thrombosis  
 Thrombotic thrombocytopenic purpura    Thyroid disorder  
 Thyroid function test abnormal    Thyroid neoplasm Tinnitus  
 Tongue discolouration    Tongue disorder    Tongue oedema    Tooth  
 disorder    Tooth impacted    Toothache Torsade de pointes    Toxic  
 epidermal necrolysis    Transaminases increased    Tremor  
 Trismus    Tubulointerstitial nephritis Type 2 diabetes  
 mellitus    Ulcer Upper gastrointestinal haemorrhageUpper respiratory  
 tract infection    Urethral disorderUrethral pain    Urinary  
 hesitation Urinary incontinence    Urinary retentionUrinary tract  
 disorder    Urinary tract infection    Urinary tract pain    Urine  
 abnormalityUrine analysis abnormal    Urine output increased  
 Urticaria    Uterine haemorrhage    Uterine leiomyoma  
 Uterovaginal prolapse Uveitis    VIIIth nerve paralysis  
 Vaginal infectionVaginal inflammation    Vascular insufficiency  
 Vascular purpura Vascular resistance systemic Vasculitis  
 Vasoconstriction Vasodilation procedure Venous thrombosis  
 Ventricular arrhythmia Ventricular extrasystoles    Ventricular  
 fibrillation    Ventricular hypertrophy    Ventricular  
 tachycardiaVertical talus    Vertigo    Vestibular disorder    Viral  
 infection    Vision blurred    Visual acuity reduced    Visual impairment  
 Vitiligo    Vomiting    Vulvovaginal candidiasis  
 Vulvovaginal mycotic infection    Water intoxication  
 Weight decreased Weight increased Wheezing    White blood cell  
 count decreased    White blood cell count increased    Xerophthalmia  
 Yawning

\*\*\*\*\*  
 \*\*\*\*\*

Cation-dependent mannose-6-phosphate receptor - Group: Transporter  
 Treated with:  
 alglucosidase alfa:    approved    biotech    (0 associated side  
 effects)    For the treatment of Pompe disease (GAA deficiency) in  
 infants and pediatric patients.  
 1-3 sugar ring of pentamannosyl 6-phosphate:    experimental    small  
 molecule    (0 associated side effects)  
 alpha-d-mannose-6-phosphate: experimental    small molecule    (0  
 associated side effects)

known side effects mediated through drugs targeting this protein:

\*\*\*\*\*  
\*\*\*\*\*

Parathyroid hormone 2 receptor - Group: Receptor

Treated with:

preotact: approved biotech (0 associated side effects) For use/treatment in osteoporosis.

known side effects mediated through drugs targeting this protein:

\*\*\*\*\*  
\*\*\*\*\*

Endothelin-1 receptor - Group: Receptor

Treated with:

bosentan: approved small molecule (196 associated side effects) Used in the treatment of pulmonary arterial hypertension (PAH), to improve exercise ability and to decrease the rate of clinical worsening (in patients with WHO Class III or IV symptoms).  
2-hydroxy-3,5-diiodobenzoic acid: experimental small molecule (0 associated side effects)

sitaxentan: approved small molecule (402 associated side effects) Investigated for use/treatment in pulmonary hypertension, connective tissue diseases, hypertension, and congestive heart failure.

492 known side effects mediated through drugs targeting this protein:

Abdominal discomfort Abdominal distension Abdominal hernia  
Abdominal pain upper Abdominal strangulated hernia  
Abdominal tenderness Abortion spontaneous Abscess  
Acidosis Acrochordon Activated partial thromboplastin time  
prolonged Acute coronary syndrome Acute sinusitis Affect  
lability Agitation Alanine aminotransferase increased Alopecia  
Alveolitis allergic Amenorrhoea Amyotrophic lateral  
sclerosis Anaemia Anal pruritus Anal skin tags  
Anaphylactic shock Aneurysm Angina pectoris Angioedema  
Angiopathy Anorectal discomfort Anxiety Aortic dissection  
Appendicitis Arrhythmia Arteriovenous fistula Arthralgia  
Arthritis Arthritis bacterial Arthritis infective  
Ascites Aspartate aminotransferase increased Aspiration  
Asthenia Asthma Ataxia Atrial fibrillation  
Atrial flutter Atrial septal defect Atrioventricular block  
Atrioventricular block complete Atrioventricular block first  
degree Atrophy Back pain Basal cell carcinoma Bladder  
disorder Bladder pain Blister Blood alkaline phosphatase  
increased Blood bicarbonate decreased Blood bilirubin increased  
Blood creatine phosphokinase increased Blood creatinine  
increased Blood glucose increased Blood lactate dehydrogenase  
increased Blood potassium decreased Blood potassium increased  
Blood pressure increased Blood pressure systolic decreased  
Blood uric acid increased Body temperature increased Bone  
disorder Bone marrow toxicity Bradycardia Breast calcifications  
Breast disorder Breast pain Breast tenderness Bronchitis  
Bronchospasm Candidiasis Cardiac arrest Cardiac disorder

Cardiac failure chronic      Cardiac failure congestive  
 Cardiac fibrillation      Cardiac flutter      Cardiac murmur  
 Cardiac septal defect      Cellulitis      Cerebrovascular accident  
 Cerumen impaction      Chest discomfort      Chest pain      Chills  
 Cholecystitis chronic      Cholelithiasis      Cholestasis      Chromaturia  
 Coagulation time prolonged      Colitis      Colonic polyp  
 Confusional state      Conjunctival haemorrhage      Conjunctival  
 hyperaemia      Conjunctivitis      Conjunctivitis allergic      Connective  
 tissue inflammation      Constipation      Convulsion      Cough      Cystitis  
 Cystitis noninfective      Deafness      Decreased appetite  
 Dehydration      Depressed level of consciousness      Dermatitis  
 Dermatitis atopic      Dermatitis bullous      Dermatitis contact  
 Diarrhoea      Dilatation atrial      Discomfort      Disease progression  
 Disturbance in attention      Disturbance in sexual arousal  
 Diverticulum      Dizziness      Dizziness postural      Drug  
 hypersensitivity      Dry mouth      Dry skin      Dry throat      Duodenal ulcer  
 Dyaesthesia      Dyspepsia      Dysphonia      Dyspnoea      Dyspnoea  
 exertional      Dyspnoea paroxysmal nocturnal      Dysuria      Ear  
 congestion      Ear discomfort      Ear infection      Ear pain      Ecchymosis  
 Eczema      Effusion      Electrocardiogram      QT prolonged  
 Electrocardiogram change      Embolism      Endocrine disorder  
 Enteritis      Eosinophil count increased      Eosinophilia  
 Epistaxis      Eructation      Erythema      Erythema multiforme  
 Extrasystoles      Eye disorder      Eye infection      Eye  
 inflammation      Eye irritation      Eye oedema      Eye pruritus  
 Eyelid ptosis      Facial pain      Faecal incontinence      Fatigue  
 Feeling abnormal      Feeling cold      Feeling hot      Fibromyalgia  
 Fistula      Flank pain      Flatulence      Fluid retention      Flushing  
 Frequent bowel movements      Fungal infection      Furuncle  
 Gallbladder disorder      Gastritis      Gastritis viral  
 Gastroenteritis      Gastroenteritis bacterial      Gastrointestinal  
 disorder      Gastrointestinal haemorrhage      Gastrointestinal infection  
 Gastrointestinal pain      Gingival pain      Gingivitis      Glossodynia  
 Glucose tolerance impaired      Goitre      Gout      Gouty tophus  
 Groin pain      Haematochezia      Haematocrit decreased      Haematocrit  
 increased      Haematoma      Haematuria      Haemoglobin decreased      Haemoglobin  
 increased      Haemolysis      Haemoptysis      Haemorrhage      Haemorrhoids      Head  
 discomfort      Headache      Heart rate irregular      Hemiparesis      Hepatic  
 cirrhosis      Hepatic enzyme increased      Hepatic failure      Hepatic  
 function abnormal      Hepatitis      Hepatobiliary disease      Hepatomegaly  
 Hernia      Herpes simplex      Herpes virus infection      Herpes  
 zoster      Hiccups      Hormone level abnormal      Hydrocephalus  
 Hyperaemia      Hyperaesthesia      Hyperbilirubinaemia  
 Hypercholesterolaemia      Hyperglycaemia      Hyperhidrosis  
 Hyperkalaemia      Hypernatraemia      Hypersensitivity  
 Hyperthermia      Hypertrophy      Hypoaesthesia      Hypocalcaemia  
 Hypoglycaemia      Hypokalaemia      Hyponatraemia      Hypotension  
 Hypoxia      Ill-defined disorder      Immune system disorder  
 Incontinence      Increased appetite      Infarction      Infection  
 Infestation      Inflammation      Influenza      Insomnia  
 International normalised ratio increased      Intertrigo  
 Intestinal obstruction      Irritability      Ischaemia      Ischaemic  
 stroke      Jaundice      Joint stiffness      Keratitis  
 Keratoconjunctivitis sicca      Lacrimation increased      Lactic  
 acidosis      Leiomyoma      Lethargy      Leukopenia      Libido increased      Liver

function test abnormal Lobar pneumonia Localised infection  
Localised oedema Loss of consciousness Lower respiratory  
tract infection Lung infection Lymphoma Malaise Mediastinal  
disorder Memory impairment Menopausal symptoms Menopause  
Menorrhagia Mental disability Mental disorder Metrorrhagia  
Migraine Mood swings Mouth haemorrhage Mouth ulceration  
Muscle atrophy Muscle fatigue Muscle haemorrhage  
Muscle spasms Muscle twitching Muscular weakness  
Musculoskeletal chest pain Musculoskeletal discomfort  
Musculoskeletal disorder Musculoskeletal pain  
Musculoskeletal stiffness Myeloproliferative disorder  
Myocardial infarction Nail hypertrophy Nasal congestion  
Nasopharyngitis Nausea Necrosis Neoplasm Neoplasm  
malignant Nephritis Nephropathy Nervous system disorder  
Nervousness Neutropenia Night sweats Nightmare Nipple pain  
Nocturnal dyspnoea Obstruction Oedema Oedema peripheral  
Oesophageal spasm Onychomycosis Oral candidiasis Oral  
pruritus Organ failure Orthopnoea Orthostatic hypotension  
Osteoarthritis Osteochondrosis Otitis media Ovarian  
cyst Oxygen saturation decreased Pain Pain in extremity Pain in jaw  
Pallor Palmar erythema Palpitations Pancreatic  
pseudocyst Pancreatitis acute Pancytopenia Panic attack  
Panic reaction Papilloma Paraesthesia Paraesthesia oral  
Paralysis Paronychia Partial seizures Peptic ulcer  
Pericardial effusion Peripheral ischaemia Petechiae  
Photophobia Pleural disorder Pleural effusion Pleurisy  
Pleuritic pain Pneumonia Pneumonia aspiration  
Pneumothorax Pollakiuria Polyarthrits Polydipsia Polyp  
Post thrombotic syndrome Pregnancy test positive  
Presyncope Proctalgia Protein urine present Proteinuria  
Prothrombin level increased Pruritus Pruritus generalised  
Pruritus genital Pseudocyst Psoriasis Pulmonary arterial  
hypertension Pulmonary embolism Pulmonary function test  
decreased Pulmonary oedema Rash Rash macular Rash papular  
Rash pustular Rectal haemorrhage Red blood cell count  
decreased Renal failure Renal impairment Respiratory depression  
Respiratory failure Respiratory tract infection Restless  
legs syndrome Retching Retinal detachment Retinal disorder  
Retinal tear Rhinitis Right ventricular failure  
Rosacea Sciatica Sensation of foreign body Sensation  
of heaviness Shock Sicca syndrome Sinus bradycardia Sinus  
congestion Sinus headache Sinus operation Sinusitis Skin  
discolouration Skin disorder Skin exfoliation Skin  
hyperpigmentation Skin irritation Skin lesion Skin necrosis Skin  
papilloma Skin ulcer Sleep disorder Sneezing Social avoidant  
behaviour Somnolence Sputum purulent Stomatitis Subarachnoid  
haemorrhage Subcutaneous abscess Supraventricular extrasystoles  
Supraventricular tachycardia Syncope Systemic lupus  
erythematosus Tachycardia Tachypnoea Tenderness Tendinitis  
Tension Testicular pain Thinking abnormal Thirst  
Throat irritation Thrombocytopenia Thrombophlebitis superficial  
Tinnitus Tongue blistering Tongue discolouration Tongue  
disorder Tongue ulceration Tooth abscess Tooth impacted  
Toothache Tracheobronchitis Tremor Tubulointerstitial  
nephritis Ulcer Upper respiratory tract infection Urethral disorder

Urinary tract disorder Urinary tract infection Urine  
colour abnormal Urosepsis Urticaria Uterine leiomyoma  
Uterovaginal prolapse VIIth nerve paralysis Vaginal  
haemorrhage Vaginal infection Vaginal prolapse Venous insufficiency  
Venous pressure jugular Venous pressure jugular increased  
Venous thrombosis Ventricular arrhythmia Ventricular  
extrasystoles Ventricular failure Ventricular tachycardia  
Vertigo Viral diarrhoea Viral infection Vision blurred  
Visual impairment Vitreous floaters Vomiting Weight decreased  
Weight fluctuation Weight increased Wheezing White blood  
cell count decreased Xerophthalmia

\*\*\*\*\*  
\*\*\*\*\*

Vesicular inhibitory amino acid transporter - Group: Transporter

Treated with:

glycine: approved, nutraceutical small molecule (38 associated  
side effects) Supplemental glycine may have antispastic activity.  
Very early findings suggest it may also have antipsychotic activity  
as well as antioxidant and anti-inflammatory activities.

38 known side effects mediated through drugs targeting this protein:

Acidosis Agitation Angina pectoris Back pain Blindness  
Blindness transient Chills Coma Convulsion Dehydration  
Diarrhoea Dizziness Dry mouth Electrolyte imbalance  
Encephalopathy Fluid overload Hyperammonaemia  
Hyperkinesia Hypersensitivity Hyponatraemia Hypotension  
Lung disorder Nausea Oedema Pain Polyuria  
Pulmonary congestion Respiratory tract congestion Rhinitis  
Salivary hypersecretion Tachycardia Thirst  
Thrombophlebitis Urinary retention Urticaria Vertigo  
Visual impairment Vomiting

\*\*\*\*\*  
\*\*\*\*\*

Interferon-alpha/beta receptor alpha chain - Group: Receptor

Treated with:

peginterferon alfa-2a: approved biotech (0 associated side  
effects) For treatment of hairy cell leukemia, malignant melanoma,  
and AIDS-related Kaposi's sarcoma.

interferon alfa-n1: approved biotech (0 associated side  
effects) For treatment of venereal or genital warts caused by the  
Human Papiloma Virus

interferon alfa-n3: approved biotech (0 associated side  
effects) For the intralesional treatment of refractory or  
recurring external condylomata acuminata.

peginterferon alfa-2b: approved biotech (0 associated side  
effects) For the treatment of chronic hepatitis C in patients not  
previously treated with interferon alpha who have compensated liver  
disease and are at least 18 years of age.

interferon alfa-2a, recombinant: approved biotech (0  
associated side effects) For the treatment of chronic hepatitis  
C, hairy cell leukemia, AIDS-related Kaposi's sarcoma, and chronic  
myelogenous leukemia. Also for the treatment of oral warts arising  
from HIV infection.



interferon beta-1a: approved biotech (0 associated side effects) For treatment of relapsing/remitting multiple sclerosis, also for condyloma acuminatum

interferon beta-1b: approved biotech (0 associated side effects) Interferon beta-1b is a drug used for the treatment of relapsing/remitting multiple sclerosis. It has been shown to slow the advance of the disease as well as to decrease the frequency of attacks.

interferon alfacon-1: approved biotech (0 associated side effects) For the treatment of hairy cell leukemia, malignant melanoma, and AIDS-related Kaposi's sarcoma

interferon alfa-2b, recombinant: approved biotech (0 associated side effects) For the treatment of hairy cell leukemia, malignant melanoma, and AIDS-related Kaposi's sarcoma.

known side effects mediated through drugs targeting this protein:

\*\*\*\*\*  
\*\*\*\*\*

Low-density lipoprotein receptor-related protein 2 - Group: Receptor  
Treated with:

urokinase: approved biotech (0 associated side effects)

Urokinase can be used for the treatment of pulmonary embolism, coronary artery thrombosis, IV catheter clearance, and venous and arterial blood clots.

insulin recombinant: approved biotech (0 associated side effects) For treatment of Type I and II diabetes mellitus.

insulin, porcine: approved biotech (0 associated side effects) For the treatment of type I and II diabetes mellitus.

gentamicin: approved small molecule (82 associated side effects) For treatment of serious infections caused by susceptible strains of the following microorganisms: &lt;i>P. aeruginosa&/i>, &lt;i>Proteus&/i> species (indole-positive and indole-negative), &lt;i>E. coli&/i>, &lt;i>Klebsiella-Enterobacter-Serratia&/i> species, &lt;i>Citrobacter&/i> species and &lt;i>Staphylococcus&/i> species (coagulase-positive and coagulase-negative).

82 known side effects mediated through drugs targeting this protein:

Agranulocytosis Alopecia Anaemia Anaphylactic shock  
Anaphylactoid reaction Arthralgia Asthenia Atrophy  
Benign intracranial hypertension Body temperature increased  
Confusional state Conjunctival hyperaemia Convulsion  
Deafness Decreased appetite Dehydration Dermatitis  
Dizziness Encephalopathy Eosinophilia Erythema  
Extravasation Fat necrosis Feeling abnormal Fibrosis  
Fluid overload Hallucination Headache Hearing impaired  
Hepatomegaly Hyperaemia Hypersensitivity Hypertension  
Hypoaesthesia Hypocalcaemia Hypokalaemia  
Hypomagnesaemia Hypotension Injection site pain Laryngeal  
oedema Lethargy Leukopenia Mass Mental disorder due to a  
general medical condition Muscle twitching Muscular weakness  
Musculoskeletal discomfort Myasthenia gravis Myasthenic  
syndrome Nausea Necrosis Neuropathy peripheral Oedema

Oliguria Pain Paraesthesia Phlebitis Pruritus  
Pulmonary fibrosis Pulmonary function test decreased  
Purpura Rash Renal impairment Respiratory depression  
Salivary hypersecretion Sensitisation Sensory loss  
Skin disorder Splenomegaly Stomatitis Tetany  
Thrombocytopenia Thrombocytopenic purpura Thrombosis  
Tinnitus Urticaria Vascular purpura Venous thrombosis  
Vertigo Visual impairment Vomiting Weight decreased

\*\*\*\*\*  
\*\*\*\*\*

Voltage-dependent calcium channel subunit alpha-2/delta-2 - Group:  
Channel

Treated with:

isradipine: approved small molecule (0 associated side effects)  
For the management of mild to moderate essential hypertension.

It may be used alone or concurrently with thiazide-type diuretics.

gabapentin: approved small molecule (456 associated side effects)  
For the management of postherpetic neuralgia in adults and as adjunctive therapy in the treatment of partial seizures with and without secondary generalization in patients over 12 years of age with epilepsy.

felodipine: approved small molecule (96 associated side effects)  
For the treatment of mild to moderate essential hypertension.

nitrendipine: approved small molecule (0 associated side effects)  
For the treatment of mild to moderate hypertension

amiodarone: approved small molecule (192 associated side effects)  
Intravenously, for initiation of treatment and prophylaxis of frequently recurring ventricular fibrillation and hemodynamically unstable ventricular tachycardia in patients refractory to other therapy. Orally, for the treatment of life-threatening recurrent ventricular arrhythmias such as recurrent ventricular fibrillation and recurrent hemodynamically unstable ventricular tachycardia.

bepridil: approved small molecule (0 associated side effects)  
For the treatment of chronic stable angina (classic effort-associated angina).

558 known side effects mediated through drugs targeting this protein:

Abdominal pain Abnormal dreams Abnormal faeces Abscess Acne  
Acute coronary syndrome Acute interstitial pneumonitis  
Acute respiratory distress syndrome Affect lability  
Ageusia Agitation Agranulocytosis Akinesia Alanine  
aminotransferase increased Alcohol intolerance Alopecia  
Alveolitis fibrosing Amblyopia Amenorrhoea Amnesia  
Anaemia Anaphylactic shock Anaphylactoid reaction  
Angina pectoris Angioedema Angiopathy Anorectal disorder  
Antisocial behaviour Antisocial personality disorder  
Anuria Anxiety Anxiety disorder Aortic dissection  
Apathy Aphasia Aplastic anaemia Apnoea Apraxia  
Areflexia Arrhythmia Arthralgia Arthritis Arthropathy  
Asocial behaviour Aspartate aminotransferase increased  
Aspiration Asthenia Asthma Ataxia Atrial  
fibrillation Atrioventricular block Atrioventricular block  
second degree Aura Back pain Benign intracranial hypertension

Bladder pain      Bleeding time prolonged      Blindness  
 Blister      Blood alkaline phosphatase increased      Blood  
 lactate dehydrogenase increased      Blood pressure increased      Blood  
 urea abnormal      Blood uric acid      Body temperature increased      Bone  
 pain      Bradycardia      Bradykinesia      Breast cancer      Breast  
 enlargement      Breast pain      Bronchiolitis      Bronchitis      Bronchospasm  
 Bundle branch block      Bundle branch block left      Bursitis  
 Candidiasis      Capillary fragility increased      Cardiac arrest  
 Cardiac disorder      Cardiac failure      Cardiac failure congestive  
 Cardiac fibrillation      Cardiogenic shock      Cardiovascular  
 disorder      Cataract      Cellulitis      Central nervous system neoplasm  
 Cerebellar syndrome      Cerebrovascular accident      Cheilitis  
 Chest pain      Chills      Cholecystitis      Cholelithiasis  
 Choreoathetosis      Chorioretinitis      Coagulopathy      Cognitive  
 disorder      Colitis      Completed suicide      Conduction disorder  
 Confusional state      Congenital cardiovascular anomaly  
 Conjunctival hyperaemia      Conjunctivitis      Connective tissue  
 disorder      Constipation      Conversion disorder      Convulsion  
 Coordination abnormal      Corneal degeneration      Corneal deposits  
 Corneal disorder      Costochondritis      Cough      Cushingoid      Cystitis  
 Cystitis noninfective      Dandruff      Deafness      Decreased  
 appetite      Deep vein thrombosis      Dehydration      Delirium  
 Demyelinating polyneuropathy      Dependence      Depersonalisation  
 Depressed level of consciousness      Dermatitis bullous  
 Dermatitis exfoliative      Diabetes mellitus      Diabetic ketoacidosis  
 Diabetic retinopathy      Diaphragmatic hernia      Diarrhoea  
 Diplopia      Discomfort      Disorientation      Dissociation  
 Disturbance in sexual arousal      Dizziness      Drug abuse      Drug  
 eruption      Dry eye      Dry mouth      Dry skin      Dry throat      Duodenal  
 ulcer      Dysaesthesia      Dysarthria      Dysgeusia      Dyskinesia  
 Dysmenorrhoea      Dyspepsia      Dysphagia      Dysphonia      Dyspnoea  
 Dystonia      Dysuria      Ear infection      Ear pain      Ecchymosis  
 Eczema      Effusion      Ejaculation disorder      Electrocardiogram  
 QT prolonged      Embolism      Encephalopathy      Eosinophilia  
 Eosinophilic pneumonia      Epididymitis      Epistaxis      Erectile  
 dysfunction      Eructation      Erythema multiforme      Erythema nodosum  
 Euphoric mood      Eustachian tube disorder      Extensor plantar  
 response      Extrasystoles      Eye disorder      Eye haemorrhage      Eye  
 pain      Eye pruritus      Eyelid ptosis      Face oedema      Faecal  
 incontinence      Fasting      Fatigue      Feeling abnormal      Fibrosis  
 Flat affect      Flatulence      Fluid retention      Flushing      Foetor  
 hepaticus      Fungal skin infection      Furuncle      Gait disturbance  
 Gamma-glutamyltransferase increased      Gastritis  
 Gastroenteritis      Gastrointestinal disorder      Gastrointestinal  
 pain      Generalised oedema      Genital discharge      Gingival bleeding  
 Gingival hyperplasia      Gingivitis      Glaucoma  
 Glomerulonephritis      Glomerulonephritis membranous      Glossitis      Glycosuria  
 Goitre      Gout      Granuloma      Gynaecomastia      Haematemesis  
 Haematochezia      Haematoma      Haematuria      Haemoglobin      Haemolytic  
 anaemia      Haemoptysis      Haemorrhage intracranial      Haemorrhoids  
 Hair disorder      Hallucination      Hangover      Headache  
 Hearing impaired      Hemiplegia      Hepatic cirrhosis      Hepatic enzyme  
 increased      Hepatic failure      Hepatic function abnormal      Hepatitis  
 cholestatic      Hepatitis fulminant      Hepatobiliary disease  
 Hepatocellular injury      Hepatomegaly      Hernia      Herpes

simplex Herpes virus infection Herpes zoster Hiccups  
 Hirsutism Hordeolum Hostility Hyperaemia Hyperaesthesia  
 Hypercholesterolaemia Hyperglycaemia Hyperhidrosis  
 Hyperkeratosis Hyperkinesia Hyperlipidaemia Hyperplasia  
 Hyperreflexia Hypertension Hyperthyroidism Hypertonia  
 Hypertrophy Hyperventilation Hypoaesthesia Hypoglycaemia  
 Hypokinesia Hyponatraemia Hyporeflexia Hypotension  
 Hypothyroidism Hypotonia Hypoventilation Hypoxia  
 Idiopathic pulmonary fibrosis Ill-defined disorder  
 Immune system disorder Inappropriate antidiuretic hormone  
 secretion Incontinence Increased appetite Increased  
 tendency to bruise Infarction Infection Infectious  
 mononucleosis Infestation Inflammation Influenza Injection  
 site reaction Inner ear disorder Insomnia Intentional self-  
 injury Interstitial lung disease Intestinal functional  
 disorder Intestinal obstruction Intestinal ulcer Iritis  
 Irritability Irritable bowel syndrome Jaundice Joint  
 stiffness Joint swelling Ketoacidosis Labyrinthitis  
 Lacrimation increased Laryngitis Lens disorder Lenticular  
 opacities Lethargy Leukocytoclastic vasculitis Leukopenia  
 Libido decreased Libido increased Lip haemorrhage Liver  
 disorder Liver function test abnormal Loss of consciousness Loss  
 of libido Lung disorder Lung infiltration Lymphadenopathy  
 Lymphocytosis Lymphoma Macular degeneration Malaise  
 Mania Mass Mediastinal disorder Melaena Melanosis  
 Memory impairment Meningism Menorrhagia Menstrual disorder  
 Mental disability Mental disorder Micturition urgency  
 Migraine Miosis Mood swings Mouth ulceration Movement  
 disorder Mucosal inflammation Mucous membrane disorder  
 Muscle contracture Muscle relaxant therapy Muscle  
 spasms Muscle twitching Muscular weakness Musculoskeletal  
 discomfort Musculoskeletal stiffness Myalgia Myocardial  
 infarction Myoclonus Myopathy Nail disorder Nasal obstruction  
 Nasopharyngitis Nausea Neck mass Neck pain Necrosis  
 Neoplasm Neoplasm malignant Nephrolithiasis Nephrotic  
 syndrome Nervous system disorder Nervousness Neuritis  
 Neuropathy peripheral Neurosis Neutropenia Nightmare  
 Nocturia Nodal arrhythmia Nodule Nystagmus  
 Obliterative bronchiolitis Obstruction Occipital neuralgia  
 Oedema peripheral Oesophageal disorder Oesophageal spasm  
 Oesophagitis Onycholysis Optic nerve disorder Optic  
 neuritis Oral candidiasis Organising pneumonia Orthostatic  
 hypotension Osteoarthritis Osteoporosis Otitis externa  
 Otitis media Ovarian failure Pain in extremity  
 Palpitations Pancreatitis Pancytopenia  
 Papilloedema Papule Paraesthesia oral Paralysis  
 Paranoia Paresis Pelvic pain Penile swelling Penis  
 disorder Peptic ulcer Pericardial effusion Pericardial rub  
 Pericarditis Peripheral vascular disorder Personality  
 disorder Pharyngitis Phlebitis Photodermatosis Photophobia  
 Photosensitivity reaction Pigmentation disorder Pleural  
 disorder Pleural effusion Pleurisy Pneumonia aspiration  
 Pollakiuria Polyneuropathy Polyserositis Polyuria  
 Proctitis Prothrombin level decreased Pruritus Pruritus  
 genital Pseudolymphoma Psoriasis Psychotic disorder

Pulmonary embolism      Pulmonary fibrosis      Pulmonary oedema  
 Pulmonary thrombosis      Pulmonary toxicity      Pulse absent  
 Pulseless electrical activity      Purpura      Pustular  
 psoriasis      Pyelonephritis      Pyuria      Rash maculo-papular      Rash  
 pustular      Rectal haemorrhage      Regurgitation      Renal failure  
 acute Renal impairment      Renal pain      Respiratory disorder      Respiratory  
 failure      Respiratory tract infection      Retinal degeneration  
 Retinal disorder      Retinal vein thrombosis      Rhabdomyolysis  
 Rhinitis      Rhinitis seasonal      Rhinorrhoea      Salivary gland  
 enlargement      Salivary hypersecretion      Scotoma      Scrotal disorder  
 Scrotal swelling      Seasonal allergy      Seborrhoeic dermatitis  
 Sepsis      Sexual dysfunction      Shock      Sinus arrest      Sinus  
 bradycardia      Sinusitis      Skin cancer      Skin discolouration      Skin  
 disorder      Skin exfoliation      Skin hypertrophy      Skin necrosis      Skin  
 odour abnormal      Skin ulcer      Sleep disorder      Sneezing      Snoring  
 Somnambulism      Somnolence      Speech disorder      Stomatitis  
 Strabismus      Stupor      Subcutaneous nodule      Subdural  
 haematoma      Suicidal behaviour      Suicide attempt      Supraventricular  
 extrasystoles      Swelling      Syncope      Tachycardia      Tendon disorder  
 Tendonitis      Tension      Testicular pain      Thinking abnormal  
 Thirst      Thrombocytopenia      Thrombophlebitis      Thrombosis  
 Thyroid cancer      Thyroid disorder      Thyroid neoplasm      Tinnitus  
 Tongue disorder      Tooth abscess      Tooth discolouration      Tooth  
 disorder      Torsade de pointes      Toxic epidermal necrolysis  
 Tremor      Ulcer      Upper respiratory tract infection      Urethral  
 disorder      Urinary incontinence      Urinary retention      Urinary tract  
 disorder      Urinary tract infection      Urine abnormality      Urine  
 analysis abnormal      Urine output increased      Urticaria      Uterovaginal  
 prolapse      VIIIth nerve paralysis      Vaginal haemorrhage      Varicose  
 vein      Vascular purpura      Vasculitis      Vasodilation procedure      Venous  
 thrombosis      Ventricular extrasystoles      Ventricular tachycardia  
 Vertigo      Vestibular disorder      Viral diarrhoea      Viral  
 infection      Vision blurred      Visual acuity reduced      Visual impairment  
 Vomiting      Vulvovaginal candidiasis      Vulvovaginal mycotic  
 infection      Vulvovaginal pain      Weight decreased      Weight increased  
 Wheezing      White blood cell count decreased

\*\*\*\*\*  
 \*\*\*\*\*

Solute carrier family 2, facilitated glucose transporter member 2 -  
 Group: Transporter

Treated with:

streptozocin:      approved      small molecule      (0 associated side  
 effects)      For the treatment of malignant neoplasms of pancreas  
 (metastatic islet cell carcinoma).

known side effects mediated through drugs targeting this protein:

\*\*\*\*\*  
 \*\*\*\*\*

Neuronal acetylcholine receptor subunit beta-2 - Group: Channel

Treated with:

nicotine:      approved      small molecule      (98 associated side effects)  
 For the relief of nicotine withdrawal symptoms and as an aid  
 to smoking cessation.

galantamine: approved small molecule (160 associated side effects) For the treatment of mild to moderate dementia of the Alzheimer's type. Has also been investigated in patients with mild cognitive impairment who did not meet the diagnostic criteria for Alzheimer's disease.

213 known side effects mediated through drugs targeting this protein:

Abdominal discomfort Abdominal pain Acne Affect lability  
 Aggression Agitation Amnesia Anaemia Anxiety  
 Apathy Aphasia Apraxia Arrhythmia Arrhythmia  
 supraventricular Arthralgia Arthritis Asthenia Ataxia  
 Atrial fibrillation Atrioventricular block Back pain  
 Bladder pain Blindness Blister Blood alkaline  
 phosphatase increased Blood urea increased Body temperature  
 increased Bone pain Bradycardia Bronchitis Bronchospasm  
 Bundle branch block Cardiac failure Cardiac fibrillation  
 Cardiovascular disorder Cataract Cerebrovascular  
 accident Cerebrovascular disorder Chest discomfort Chest pain  
 Coagulopathy Completed suicide Confusional state  
 Constipation Convulsion Coordination abnormal Cough  
 Cystitis Cystitis noninfective Decreased appetite  
 Dehydration Delirium Dependence Depression Dermatitis  
 Dermatitis bullous Diarrhoea Discomfort Disturbance in  
 attention Disturbance in sexual arousal Diverticulitis  
 Dizziness Drug abuse Drug dependence Dry mouth Dysgeusia  
 Dysmenorrhoea Dyspepsia Dysphagia Dysphonia Dyspnoea  
 Ear pain Electrocardiogram QT prolonged Electrocardiogram  
 T wave inversion Epistaxis Eye disorder Eye irritation  
 Fatigue Feeling abnormal Flat affect Flatulence Flushing  
 Gastric disorder Gastritis Gastroenteritis Gastrointestinal  
 haemorrhage Gastrointestinal pain Gravitational oedema Haematuria  
 Haemoglobin Haemorrhage Hallucination Headache Hepatic  
 enzyme increased Hepatitis Hepatobiliary disease Hiccups  
 Hyperglycaemia Hyperhidrosis Hyperkinesia  
 Hypersensitivity Hypersomnia Hypertension Hypertonia  
 Hypoaesthesia Hypokalaemia Hypokinesia Hypotension Ill-  
 defined disorder Immune system disorder Incontinence Increased  
 appetite Increased bronchial secretion Infarction Infection  
 Influenza Insomnia Irritability Ischaemia Lacrimation  
 increased Lethargy Libido increased Liver disorder Loss of  
 consciousness Lower gastrointestinal haemorrhage Malaise  
 Melaena Menstrual disorder Mental disability Mental  
 disorder Migraine Mood swings Muscle contractions involuntary  
 Muscle spasms Musculoskeletal discomfort Musculoskeletal  
 disorder Myalgia Myocardial ischaemia Nasal congestion Nasal  
 discomfort Nasal ulcer Nasopharyngitis Nausea Nephrolithiasis  
 Nervous system disorder Nervousness Neuropathy peripheral  
 Nightmare Nocturia Oedema Oedema peripheral Oesophageal  
 disorder Oesophageal perforation Orthostatic hypotension  
 Pain Pain in extremity Pain in jaw Palpitations  
 Paraesthesia Paranoia Pharyngitis Pneumonia Pollakiuria  
 Pruritus Purpura Rash Rectal haemorrhage Renal  
 failure Respiratory disorder Respiratory tract infection  
 Rhinitis Rhinorrhoea Salivary hypersecretion Sensory

loss Shock Sinusitis Sleep disorder Sneezing Somnolence  
Sputum increased Stomatitis Suicidal ideation Suicide attempt  
Supraventricular tachycardia Syncope Tachycardia Tension  
Throat irritation Thrombocytopenia Thrombocytosis Tinnitus  
Tobacco user Tooth disorder Transient ischaemic attack  
Tremor Ulcer Upper respiratory tract infection Urethral  
disorder Urinary incontinence Urinary retention Urinary tract  
disorder Urinary tract infection Vascular dementia Vascular  
purpura Ventricular tachycardia Vertigo Vision blurred  
Visual acuity reduced Visual impairment Vomiting Weight  
decreased Weight increased Withdrawal syndrome

\*\*\*\*\*  
\*\*\*\*\*

Prostaglandin D2 receptor - Group: Receptor

Treated with:

nedocromil: approved small molecule (44 associated side effects)  
For the treatment of mild to moderate asthma

44 known side effects mediated through drugs targeting this protein:

Abdominal pain Anaphylactic shock Arthritis Asthenia Body  
temperature increased Bronchitis Chest pain Cough Dermatitis  
Diarrhoea Dizziness Dyspepsia Dyspnoea Eosinophilia  
Erythema Fatigue Feeling abnormal Feeling hot  
Gastrointestinal pain Headache Increased bronchial  
secretion Infection Leukopenia Loeffler's syndrome Malaise  
Nasal congestion Nausea Neutropenia Ocular hyperaemia Pain  
Pharyngitis Photophobia Pneumonia Pulmonary eosinophilia Rash  
Respiratory disorder Respiratory tract infection Rhinitis  
Sinusitis Sputum increased Tremor Upper respiratory  
tract infection Viral infection Vomiting

\*\*\*\*\*  
\*\*\*\*\*

Alpha-2C adrenergic receptor - Group: Receptor

Treated with:

bethanidine: approved small molecule (0 associated side  
effects) For the treatment of hypertension.

ziprasidone: approved small molecule (251 associated side  
effects) For the treatment of schizophrenia and related psychotic  
disorders.

cabergoline: approved small molecule (96 associated side  
effects) For the treatment of hyperprolactinemic disorders, either  
idiopathic or due to prolactinoma (prolactin-secreting adenomas).  
May also be used to manage symptoms of Parkinsonian Syndrome as  
monotherapy during initial symptomatic management or as an adjunct  
to levodopa therapy during advanced stages of disease.

ropinirole: approved small molecule (631 associated side  
effects) For the treatment of the signs and symptoms of idiopathic  
Parkinson's disease. Also used for the treatment of restless legs  
syndrome.

olanzapine: approved small molecule (393 associated side  
effects) For the acute and maintenance treatment of schizophrenia  
and related psychotic disorders, as well as acute treatment of manic  
or mixed episodes of bipolar 1 disorder. Intramuscular olanzapine is  
indicated for the rapid control of agitated patients.

clozapine: approved small molecule (228 associated side effects) For use in patients with treatment-resistant schizophrenia.

norepinephrine: approved small molecule (22 associated side effects) Mainly used to treat patients in vasodilatory shock states such as septic shock and neurogenic shock and has shown a survival benefit over dopamine. Also used as a vasopressor medication for patients with critical hypotension.

pramipexole: approved small molecule (620 associated side effects) For the treatment of signs and symptoms of idiopathic Parkinson's disease

brimonidine: approved small molecule (109 associated side effects) For the lowering of intraocular pressure in patients with open-angle glaucoma or ocular hypertension.

clonidine: approved small molecule (161 associated side effects) May be used as an adjunct in the treatment of hypertension, as an epidural infusion as an adjunct treatment in the management of severe cancer pain that is not relieved by opiate analgesics alone, for differential diagnosis of pheochromocytoma in hypertensive patients, prophylaxis of vascular migraine headaches, treatment of severe dysmenorrhea, management of vasomotor symptoms associated with menopause, rapid detoxification in the management of opiate withdrawal, treatment of alcohol withdrawal used in conjunction with benzodiazepines, management of nicotine dependence, topical use to reduce intraocular pressure in the treatment of open-angle and secondary glaucoma and hemorrhagic glaucoma associated with hypertension, and in the treatment of attention-deficit hyperactivity disorder (ADHD).

lisuride: approved small molecule (0 associated side effects)  
For the management of Parkinson's Disease

tizanidine: approved small molecule (230 associated side effects) For the management of increased muscle tone associated with spasticity

apomorphine: approved small molecule (45 associated side effects) For the acute, intermittent treatment of hypomobility, off episodes (end-of-dose wearing off and unpredictable on/off episodes) associated with advanced Parkinson's disease.

risperidone: approved small molecule (532 associated side effects) For the treatment of schizophrenia in adults and in adolescents, ages 13 to 17, and for the short-term treatment of manic or mixed episodes of bipolar I disorder in children and adolescents ages 10 to 17. May also be used to manage symptoms of inappropriate behavior due to aggression and/or psychosis in patients with severe dementia.

fenoldopam: approved small molecule (51 associated side effects)  
For the in-hospital, short-term (up to 48 hours) management of severe hypertension when rapid, but quickly reversible, emergency reduction of blood pressure is clinically indicated, including malignant hypertension with deteriorating end-organ function.

phenoxybenzamine: approved small molecule (9 associated side effects) For the treatment of pheochromocytoma (malignant), benign prostatic hypertrophy and malignant essential hypertension.

doxepin: approved small molecule (210 associated side effects) Labeled indications: depression and insomnia. Unlabeled



indications: chronic and neuropathic pain, anxiety, idiopathic urticaria.

pergolide: approved, withdrawn small molecule (354 associated side effects) Indicated as adjunctive treatment to

levodopa/carbidopa in the management of the signs and symptoms of Parkinson's disease. It was withdrawn from the US and Canadian markets in 2007 due to an increased risk of cardiac valvulopathy.

bromocriptine: approved small molecule (120 associated side effects) For the treatment of galactorrhea due to hyperprolactinemia, prolactin-dependent menstrual disorders and infertility, prolactin-secreting adenomas, prolactin-dependent male hypogonadism, as adjunct therapy to surgery or radiotherapy for acromegaly or as monotherapy in special cases, as monotherapy in early Parkinsonian Syndrome or as an adjunct with levodopa in advanced cases with motor complications. Bromocriptine has also been used off-label to treat restless legs syndrome and neuroleptic malignant syndrome.

quetiapine: approved small molecule (359 associated side effects) For the treatment of schizophrenia and related psychotic disorders.

aripiprazole: approved small molecule (630 associated side effects) For the treatment of schizophrenia and related psychotic disorders.

paliperidone: approved small molecule (216 associated side effects) For the treatment of schizophrenia.

ephedra: approved, withdrawn, nutraceutical small molecule (0 associated side effects) Ephedra is widely used by athletes, despite a lack of evidence that it enhances athletic performance. Ephedra has also been used for weight loss.

yohimbine: approved small molecule (0 associated side effects) Indicated as a sympatholytic and mydriatic. Impotence has been successfully treated with yohimbine in male patients with vascular or diabetic origins and psychogenic origins.

methotrimeprazine: approved small molecule (0 associated side effects) For the treatment of psychosis, particular those of schizophrenia, and manic phases of bipolar disorder.

methamphetamine: illicit, approved small molecule (30 associated side effects) For the treatment of Attention Deficit Disorder with Hyperactivity (ADHD) and exogenous obesity.

droxidopa: approved small molecule (0 associated side effects) For treatment of neurogenic orthostatic hypotension (NOH) associated with various disorders including Multiple System Atrophy, Familial Amyloid Polyneuropathy, hemodialysis induced hypotension and Parkinson's Disease. Also investigated for use/treatment in neurologic disorders, nephropathy, blood (blood forming organ disorders, unspecified), and dizzy/fainting spells.

xylometazoline: approved small molecule (0 associated side effects) It is used for treating nasal congestion and minor inflammation due to allergies or colds.

1306 known side effects mediated through drugs targeting this protein:

|                      |                      |                      |                      |                    |                |                      |
|----------------------|----------------------|----------------------|----------------------|--------------------|----------------|----------------------|
| Abasia               | Abdominal adhesions  | Abdominal discomfort | Abdominal distension | Abdominal neoplasm | Abdominal pain | Abdominal pain lower |
| Abdominal pain upper | Abdominal tenderness | Abnormal             |                      |                    |                |                      |

behaviour Abnormal dreams Abnormal faeces Abscess  
Accommodation disorder Acidosis Acne Actinic keratosis Acute  
abdomen Acute coronary syndrome Acute lymphocytic leukaemia  
Acute psychosis Acute tonsillitis Adenocarcinoma Adenoma  
benign Adhesion Adjustment disorder Adrenal insufficiency  
Affect lability Affective disorder Ageusia Aggression  
Agitation Agoraphobia Agranulocytosis Akathisia Akinesia  
Alanine aminotransferase increased Albright's disease  
Albuminuria Alcohol intolerance Alkalosis Alopecia  
Altered state of consciousness Amaurosis fugax Amblyopia  
Amenorrhoea Amnesia Anaemia Anaemia macrocytic  
Anaemia megaloblastic Anaphylactic shock Anaphylactoid  
reaction Aneurysm Anger Angina pectoris Angina unstable  
Angioedema Angiomyolipoma Angiopathy Angle closure glaucoma  
Anorectal discomfort Anorectal disorder Anorgasmia  
Antidiuretic hormone abnormality Antisocial behaviour  
Antisocial personality disorder Anxiety Aortic dissection  
Apathy Aphasia Aphthous stomatitis Apnoea  
Appendicitis Application site reaction Apraxia  
Arrhythmia Arrhythmia supraventricular Arterial disorder  
Arterial occlusive disease Arterial stenosis Arteriosclerosis  
Arteritis Arthralgia Arthritis Arthropathy Ascites  
Asocial behaviour Aspartate aminotransferase increased  
Asphyxia Aspiration Asthenia Asthma Ataxia  
Atelectasis Atrial fibrillation Atrial flutter Atrial  
septal defect Atrioventricular block first degree  
Atrioventricular block second degree Atrophy Aura  
Automatism Autonomic nervous system imbalance Azotaemia Back  
pain Bacterial infection Balance disorder Balanoposthitis Basal  
cell carcinoma Basophilia Benign intracranial hypertension  
Benign neoplasm Benign neoplasm of skin Benign prostatic  
hyperplasia Biliary colic Binge eating Bladder cancer  
Bladder disorder Bladder pain Blepharitis Blepharospasm  
Blindness Blindness transient Blister Blood alkaline  
phosphatase increased Blood amylase increased Blood  
antidiuretic hormone abnormal Blood bilirubin increased Blood  
cholesterol increased Blood creatine phosphokinase increased Blood  
creatinine increased Blood electrolytes abnormal Blood glucose  
decreased Blood glucose increased Blood insulin increased  
Blood iron decreased Blood lactate dehydrogenase increased  
Blood phosphorus increased Blood potassium decreased Blood  
potassium increased Blood pressure abnormal Blood pressure  
diastolic decreased Blood pressure fluctuation Blood pressure  
increased Blood pressure systolic decreased Blood prolactin  
increased Blood testosterone decreased Blood triglycerides  
increased Blood triglycerides normal Blood urea increased Blood  
uric acid increased Blood urine Blood urine present Blunted  
affect Body temperature decreased Body temperature increased  
Bone disorder Bone pain Bone sarcoma Bradycardia  
Bradykinesia Bradyphrenia Brain neoplasm Brain  
neoplasm benign Brain oedema Breast cancer Breast cyst  
Breast discharge Breast discomfort Breast disorder Breast  
disorder female Breast disorder male Breast engorgement  
Breast enlargement Breast feeding Breast neoplasm  
Breast pain Breast swelling Breast tenderness Breath odour

Bronchiolitis      Bronchitis      Bronchopneumonia  
 Bronchopneumopathy      Bronchospasm      Bruxism  
 Buccoglossal syndrome      Bulimia nervosa      Bundle branch block  
 Bundle branch block left      Bundle branch block right  
 Burning sensation      Bursitis      Cachexia      Calculus bladder  
 Calculus urinary      Cancer in remission      Candidiasis  
 Carbohydrate tolerance decreased      Cardiac arrest      Cardiac  
 disorder      Cardiac failure      Cardiac failure congestive      Cardiac  
 fibrillation      Cardiac flutter      Cardiac murmur      Cardiac septal  
 defect      Cardiac valve disease      Cardio-respiratory arrest  
 Cardiomegaly      Cardiomyopathy      Cardiopulmonary failure  
 Cardiovascular disorder      Carotid artery occlusion  
 Carpal tunnel syndrome      Cataplexy      Cataract      Catatonia      Cells  
 in urine      Cellulitis      Cerebral artery embolism      Cerebral atrophy  
 Cerebral haemorrhage      Cerebral infarction      Cerebral  
 ischaemia      Cerebrospinal fluid rhinorrhoea      Cerebrovascular  
 accident      Cerebrovascular disorder      Cervicitis      Cervix carcinoma  
 Chapped lips      Cheilitis      Chest discomfort      Chest pain  
 Chills      Choking      Cholecystitis      Cholecystitis chronic  
 Cholelithiasis      Cholestasis      Choreoathetosis  
 Chromaturia      Chronic lymphocytic leukaemia      Chronic  
 obstructive pulmonary disease      Coagulopathy      Coccydynia  
 Cognitive disorder      Cogwheel rigidity      Cold sweat      Colitis  
 Colitis ulcerative      Colon cancer      Colonic pseudo-  
 obstruction      Colorectal cancer      Coma      Completed suicide      Compulsions  
 Condition aggravated      Confusional state      Congenital anomaly  
 Congenital eye disorder      Congenital foot malformation  
 Congenital genitourinary abnormality      Conjunctival follicles  
 Conjunctival haemorrhage      Conjunctival hyperaemia  
 Conjunctival oedema      Conjunctivitis      Conjunctivitis  
 allergic      Connective tissue disorder      Constipation      Convulsion  
 Coombs test positive      Coordination abnormal      Corneal erosion  
 Corneal lesion      Corneal staining      Coronary artery disease  
 Coronary artery occlusion      Costochondritis      Cough      Crocodile  
 tears syndrome      Crying      Cyanosis      Cystitis      Cystitis  
 noninfective      Cytolytic hepatitis      Dandruff      Deafness      Death  
 Decreased appetite      Decubitus ulcer      Deep vein thrombosis  
 Deficiency anaemia      Dehydration      Delirium      Delusion  
 Dementia      Dementia with Lewy bodies      Dental caries  
 Dependence      Depersonalisation      Depressed level of consciousness  
 Depressed mood      Depression      Depressive symptom  
 Derealisation      Dermal cyst      Dermatitis atopic      Dermatitis  
 bullous      Dermatitis contact      Dermatitis exfoliative      Dermatitis  
 infected      Dermoid cyst      Developmental delay      Device related  
 infection      Diabetes mellitus      Diabetic coma      Diabetic  
 hyperglycaemic coma      Diabetic hyperosmolar coma      Diabetic  
 ketoacidosis      Diaphragmatic hernia      Diarrhoea      Diplopia  
 Discomfort      Disorientation      Disseminated intravascular  
 coagulation      Dissociation      Disturbance in attention      Disturbance  
 in sexual arousal      Diverticulitis      Dizziness      Dizziness exertional  
 Dizziness postural      Drooling      Drug abuse      Drug dependence  
 Drug eruption      Drug hypersensitivity      Drug ineffective      Drug  
 interaction      Drug level increased      Drug withdrawal syndrome      Drug  
 withdrawal syndrome      neonatal      Dry eye      Dry mouth      Dry skin      Dry  
 throat      Duodenal ulcer      Duodenal ulcer haemorrhage      Duodenitis

Dysarthria Dysentery Dysgeusia Dysgraphia Dyskinesia  
 Dysmenorrhoea Dyspepsia Dysphagia Dysphemia Dysphonia  
 Dysphoria Dyspnoea Dyspnoea exertional Dystonia  
 Dysuria Ear disorder Ear infection Ear pain  
 Ecchymosis Eclampsia Eczema Effusion Ejaculation  
 delayed Ejaculation disorder Ejaculation failure Elastosis  
 perforans Elderly Electrocardiogram QRS complex  
 Electrocardiogram QT prolonged Electrocardiogram ST segment  
 depression Electrocardiogram ST segment elevation Electrocardiogram  
 T wave inversion Electrocardiogram abnormal Electrocardiogram  
 change Electroencephalogram abnormal Electrolyte imbalance  
 Elevated mood Embolism Emotional disorder Emotional  
 distress Emphysema Encephalopathy Endocrine disorder  
 Endometrial cancer Endometrial neoplasm Energy increased  
 Enteritis Enuresis Enzyme abnormality Eosinophil count  
 increased Eosinophilia Epicondylitis Epididymitis  
 Epilepsy Epistaxis Erectile dysfunction Eructation  
 Erythema Erythema multiforme Erythema of eyelid  
 Erythromelalgia Euphoric mood Exfoliative rash Exostosis  
 Extradural abscess Extrapyrarnidal disorder  
 Extrasystoles Extravasation Eye discharge Eye  
 disorder Eye haemorrhage Eye infection Eye inflammation Eye  
 irritation Eye movement disorder Eye pain Eye pruritus Eye  
 swelling Eyelid disorder Eyelid function disorder Eyelid  
 oedema Eyelid ptosis Eyelids pruritus Face oedema Facial pain  
 Facial paresis Faecal incontinence Faecalith Faecaloma  
 Faeces discoloured Faeces hard Fasciitis Fasting  
 Fatigue Fear Feeling abnormal Feeling cold Feeling hot  
 Feeling jittery Female sexual dysfunction Fibroadenoma of  
 breast Fibrocystic breast disease Fibrosis Flank pain Flat  
 affect Flatulence Fluid overload Fluid retention Flushing  
 Foetor hepaticus Folliculitis Formication Fungal infection  
 Fungal skin infection Furuncle Gait disturbance  
 Galactorrhoea Gallbladder cancer Gallbladder disorder  
 Gamma-glutamyltransferase increased Gangrene Gastric  
 cancer Gastric disorder Gastric haemorrhage Gastric pH  
 decreased Gastric polyps Gastric ulcer Gastric ulcer  
 haemorrhage Gastritis Gastritis haemorrhagic Gastroenteritis  
 Gastrointestinal disorder Gastrointestinal haemorrhage  
 Gastrointestinal infection Gastrointestinal neoplasm  
 Gastrointestinal obstruction Gastrointestinal pain  
 Gastrointestinal stromal tumour Gastrointestinal tract  
 irritation Gastrooesophageal reflux disease Generalised oedema  
 Genital candidiasis Genital discharge Gestational  
 hypertension Gingival bleeding Gingival infection Gingival  
 pain Gingival recession Gingivitis Glaucoma Glossitis  
 Glossodynia Glucose tolerance decreased Glucose tolerance  
 impaired Glycosuria Glycosylated haemoglobin increased Goitre  
 Gout Grand mal convulsion Gravitational oedema Groin pain  
 Gynaecomastia Haemangioma Haematemesis Haematochezia  
 Haematocrit decreased Haematoma Haematuria Haemoglobin  
 Haemoglobin decreased Haemoglobin increased Haemoglobinuria  
 Haemolysis Haemoptysis Haemorrhage Haemorrhage intracranial  
 Haemorrhoids Haemothorax Hallucination Hallucination,  
 auditory Hallucination, visual Hallucinations, mixed Hangover

Head discomfort    Head titubation    Headache    Hearing impaired  
 Heart disease congenital    Heart rate irregular    Hemianopia  
 Hemiparesis Hemiplegia    Hepatic cirrhosis Hepatic enzyme  
 increased    Hepatic failure    Hepatic fibrosis    Hepatic function  
 abnormal    Hepatic necrosis    Hepatic neoplasm malignant    Hepatic  
 steatosis    Hepatitis    Hepatitis cholestatic    Hepatitis fulminant  
 Hepatobiliary disease    Hepatocellular injury    Hepatomegaly  
 Hereditary disorder    Hernia    Herpes simplex    Herpes  
 virus infection    Herpes zoster    Hiccups    Hirsutism    Homicidal  
 ideation    Hordeolum    Hormone level abnormal    Hostility    Hot flush  
 Hunger    Hydrocephalus    Hyperacusis    Hyperaemia  
 Hyperaesthesia    Hyperbilirubinaemia    Hyperchloraemia  
 Hyperchlorhydria    Hypercholesterolaemia    Hyperglycaemia  
 Hyperhidrosis    Hyperinsulinism    Hyperkalaemia  
 Hyperkeratosis    Hyperkinesia    Hyperlipidaemia  
 Hypermagnesaemia    Hypernatraemia    Hyperparathyroidism  
 Hyperphagia    Hyperphosphataemia    Hyperplasia  
 Hyperprolactinaemia    Hyperpyrexia    Hyperreflexia  
 Hypersensitivity    Hypersexuality    Hypersomnia    Hypertension  
 Hypertensive crisis    Hyperthermia    Hyperthyroidism  
 Hypertonia    Hypertonic bladder    Hypertrichosis  
 Hypertriglyceridaemia    Hypertrophy    Hyperuricaemia  
 Hyperuricosuria    Hyperventilation    Hypoaesthesia  
 Hypoaesthesia oral    Hypocalcaemia    Hypochloraemia  
 Hypocholesterolaemia    Hypochromic anaemia    Hypoglycaemia  
 Hypogonadism    Hypohidrosis    Hypokalaemia    Hypokinesia  
 Hypomagnesaemia    Hypomania    Hypomenorrhoea    Hyponatraemia  
 Hypophagia    Hypoproteinaemia    Hyporeflexia    Hypotension  
 Hypothermia    Hypothyroidism    Hypotonia    Hypoventilation  
 Hypovitaminosis    Hypovolaemia    Hypoxia    Idiopathic  
 thrombocytopenic purpura    Ileus    Ileus paralytic    Ill-defined  
 disorder    Illusion    Immune system disorder    Impaired healing  
 Inappropriate antidiuretic hormone secretion    Incontinence  
 Increased appetite    Induration    Infarction    Infected cyst  
 Infection    Infestation    Inflammation    Influenza    Influenza  
 like illness    Inguinal hernia    Initial insomnia    Injection site  
 mass    Injection site pain    Injection site reaction    Inner ear  
 disorder    Insomnia    Intention tremor    Intentional self-injury  
 Intermittent claudication    Interstitial lung disease  
 Intervertebral disc degeneration    Intervertebral disc disorder  
 Intervertebral disc protrusion    Intervertebral discitis  
 Intestinal functional disorder    Intestinal obstruction  
 Intestinal perforation    Intracranial pressure increased  
 Iritis    Iron deficiency    Iron deficiency anaemia  
 Irritability    Irritable bowel syndrome    Ischaemia  
 Ischaemic hepatitis    Ischaemic stroke    Jaundice    Jaundice  
 cholestatic    Joint contracture    Joint effusion    Joint range of motion  
 decreased    Joint stiffness    Joint swelling    Judgement impaired  
 Keratitis    Keratoconjunctivitis sicca    Keratopathy  
 Ketoacidosis    Ketosis    Laboratory test abnormal  
 Lacrimal disorder    Lacrimation decreased    Lacrimation increased  
 Lactic acidosis    Lactose intolerance    Laryngeal cancer  
 Laryngeal disorder    Laryngeal neoplasm    Laryngeal oedema  
 Laryngitis    Laryngospasm    Left ventricular failure  
 Leiomyoma    Lens disorder    Lenticular opacities    Lenticular

pigmentation Lethargy Leukaemia Leukocytosis Leukoderma  
 Leukopenia Leukoplakia oral Libido decreased Libido increased  
 Lichenoid keratosis Lip and/or oral cavity cancer Lip  
 blister Lip dry Lip swelling Lipoma Livedo  
 reticularis Liver disorder Liver function test abnormal Liver  
 injury Lividity Lobar pneumonia Localised infection  
 Localised oedema Logorrhoea Loss of consciousness Loss of  
 libido Lower respiratory tract infection Lung adenocarcinoma  
 stage I Lung cancer metastatic Lung disorder Lung infiltration  
 Lung neoplasm malignant Lymphadenitis Lymphadenopathy  
 Lymphatic disorder Lymphocytic leukaemia Lymphocytosis  
 Lymphoedema Lymphoma Lymphopenia Macular degeneration  
 Macule Maculopathy Major depression Malaise Male sexual  
 dysfunction Malignant melanoma Mania Masked facies Mastitis  
 Mediastinal disorder Melaena Melanocytic naevus  
 Memory impairment Meningitis Menopausal symptoms Menopause  
 Menorrhagia Menstrual disorder Menstruation delayed  
 Menstruation irregular Mental disability Mental disorder  
 Mental retardation Mental status changes Metabolic  
 alkalosis Metastasis Metastatic neoplasm Metrorrhagia  
 Micturition disorder Micturition urgency Middle ear  
 disorder Middle ear effusion Middle insomnia Migraine with  
 aura Migraine without aura Miosis Mitral valve incompetence  
 Mobility decreased Monarthritits Monocytosis Mood swings  
 Motion sickness Mouth ulceration Movement disorder Multiple  
 hereditary exostosis Multiple myeloma Muscle atrophy Muscle  
 contractions involuntary Muscle contracture Muscle enzyme  
 increased Muscle relaxant therapy Muscle rigidity Muscle  
 spasms Muscle tightness Muscle twitching Muscular weakness  
 Musculoskeletal chest pain Musculoskeletal discomfort  
 Musculoskeletal disorder Musculoskeletal pain  
 Musculoskeletal stiffness Myalgia Myasthenic syndrome  
 Mydriasis Myelitis Myocardial infarction Myocardial  
 ischaemia Myocarditis Myoclonus Myopathy Myopia Myositis  
 Nail disorder Nail infection Narcolepsy Nasal congestion  
 Nasal disorder Nasal dryness Nasal oedema Nasal  
 polyps Nasopharyngitis Nausea Neck pain Necrosis  
 Necrosis ischaemic Neoplasm malignant Neoplasm prostate  
 Neoplasm recurrence Neoplasm skin Nephritis  
 Nephrolithiasis Nephrotic syndrome Nerve root lesion  
 Nervous system disorder Nervousness Neuralgia Neuritis  
 Neurodermatitis Neurogenic bladder Neuroleptic malignant  
 syndrome Neurological symptom Neuroma Neuropathy peripheral  
 Neurosis Neutropenia Neutrophil count decreased Neutrophil  
 count increased Night sweats Nightmare Nocturia Nodal  
 arrhythmia Nodule Normochromic normocytic anaemia Nuchal  
 rigidity Nystagmus Obesity Obsessive thoughts Obstruction  
 Obstructive airways disorder Ocular hyperaemia Oculogyric crisis  
 Oedema Oedema peripheral Oesophageal carcinoma Oesophageal  
 disorder Oesophageal spasm Oesophageal stenosis Oesophageal ulcer  
 Oesophagitis Oligomenorrhoea Oliguria Onychomycosis  
 Opisthotonus Optic atrophy Optic neuritis Oral  
 candidiasis Oral neoplasm benign Oral pain Orchitis noninfective  
 Oropharyngeal discomfort Oropharyngeal pain  
 Oropharyngeal spasm Orthostatic hypotension

Osteoarthritis Osteoarthropathy Osteodystrophy  
 Osteomyelitis Osteonecrosis Osteopenia Osteoporosis  
 Otitis externa Otitis media Otitis media acute  
 Otitis media chronic Ovarian cancer Ovarian cyst Pain  
 Pain in extremity Pain in jaw Pallor Palpitations  
 Pancreatitis acute Pancytopenia Panic attack Panic  
 disorder Panic disorder with agoraphobia Panic reaction  
 Papilloma Papule Paraesthesia oral Paralysis Paranoia  
 Parasomnia Paresis Parkinsonian gait Parkinsonism  
 Paronychia Parosmia Parotitis Pathological fracture  
 Pathological gambling Pelvic pain Penis disorder Peptic  
 ulcer Pericardial effusion Pericarditis constrictive Perineal  
 pain Periodontitis Periorbital oedema Peripheral coldness  
 Peripheral ischaemia Peripheral vascular disorder Peritoneal  
 adhesions Personality change Personality disorder Petechiae  
 Pharyngeal disorder Pharyngeal erythema Pharyngitis  
 Phlebitis Phlebitis superficial Phobia Phonological  
 disorder Photophobia Photopsia Photosensitivity allergic reaction  
 Photosensitivity reaction Pigmentation disorder Pituitary  
 tumour benign Plasmacytoma Platelet count decreased  
 Pleural disorder Pleural effusion Pleural fibrosis Pleurisy  
 Pneumonia Pneumonia aspiration Pneumothorax Poisoning  
 Poliomyelitis Pollakiuria Polyarteritis nodosa  
 Polycythaemia Polydipsia Polymyalgia rheumatica Polyp  
 Polyuria Post procedural infection Postmenopausal  
 haemorrhage Postural orthostatic tachycardia syndrome Posture  
 abnormal Pre-eclampsia Precocious puberty Premature  
 ejaculation Premenstrual syndrome Presyncope Priapism Proctalgia  
 Productive cough Prolactinoma Prostate cancer Prostatic  
 adenoma Prostatic disorder Prostatitis Protein urine present  
 Proteinuria Protrusion tongue Prurigo Pruritus Pruritus  
 generalised Pruritus genital Pseudolymphoma Psoriasis Psychiatric  
 symptom Psychomotor retardation Psychotic disorder  
 Puberty Pulmonary congestion Pulmonary embolism  
 Pulmonary fibrosis Pulmonary function test decreased  
 Pulmonary hypertension Pulmonary oedema Punctate keratitis  
 Purpura Pyelonephritis Pyoderma Pyuria Rales Rash  
 erythematous Rash generalised Rash macular Rash maculo-  
 papular Rash papular Rash pustular Rash vesicular  
 Raynaud's phenomenon Rectal cancer Rectal haemorrhage  
 Rectal tenesmus Red blood cell count decreased Red blood  
 cell sedimentation rate increased Reflux oesophagitis Regressive  
 behaviour Regurgitation Renal artery stenosis Renal colic Renal  
 cyst Renal failure acute Renal impairment Renal neoplasm Renal  
 pain Respiratory acidosis Respiratory alkalosis Respiratory  
 arrest Respiratory depression Respiratory disorder Respiratory  
 distress Respiratory failure Respiratory tract congestion  
 Respiratory tract infection Respiratory tract infection viral  
 Restless legs syndrome Retching Retinal artery occlusion  
 Retinal detachment Retinal disorder Retinal haemorrhage  
 Retinal vascular disorder Retinitis pigmentosa Retrograde  
 ejaculation Retroperitoneal fibrosis Rhabdomyolysis Rheumatoid  
 arthritis Rhinitis Rhinitis allergic Rhinitis seasonal Rhinorrhoea  
 Rhonchi Rosacea Rotator cuff syndrome Sacroiliitis  
 Saliva altered Salivary duct obstruction Salivary gland

disorder Salivary gland enlargement Salivary gland pain  
 Salivary hypersecretion Salpingitis Sarcoidosis Sarcoma  
 Scab Schizoaffective disorder Schizophrenia  
 Schizophreniform disorder Sciatica Scotoma Seasonal  
 allergy Seborrhoeic dermatitis Seborrhoeic keratosis Sedation  
 Sensation of foreign body Sensation of heaviness  
 Sensitisation Sensory disturbance Sensory loss  
 Sepsis Septic shock Severe acute respiratory syndrome  
 Sexual dysfunction Shock Sialoadenitis Sicca syndrome  
 Sick sinus syndrome Sinus arrhythmia Sinus bradycardia Sinus  
 congestion Sinus disorder Sinus headache Sinus tachycardia  
 Sinusitis Skin burning sensation Skin cancer Skin  
 discolouration Skin disorder Skin exfoliation Skin  
 hyperpigmentation Skin hypertrophy Skin infection Skin irritation  
 Skin lesion Skin mass Skin odour abnormal Skin papilloma  
 Skin ulcer Sleep apnoea syndrome Sleep attacks Sleep  
 disorder Sleep paralysis Sleep talking Sleep terror  
 Sluggishness Small intestinal obstruction Sneezing  
 Snoring Social avoidant behaviour Somnambulism  
 Somnolence Speech disorder Spinal osteoarthritis Spine  
 malformation Splenomegaly Spondylitis Squamous cell  
 carcinoma Status epilepticus Stevens-Johnson syndrome  
 Sticky skin Stomatitis Stress Stridor Stupor  
 Subarachnoid haemorrhage Subcutaneous abscess  
 Subcutaneous nodule Subdural haematoma Sudden death  
 Suicidal ideation Suicide attempt Superior sagittal sinus  
 thrombosis Supraventricular extrasystoles Supraventricular  
 tachycardia Surgery Suspiciousness Swelling Swelling face  
 Swollen tongue Syncope Synostosis Synovitis Systemic  
 lupus erythematosus Tachycardia Tachypnoea Tardive dyskinesia  
 Tearfulness Tenderness Tendonitis Tenosynovitis Tension  
 Tension headache Terminal insomnia Testicular disorder  
 Testicular pain Testicular swelling Tetany Therapeutic  
 response decreased Therapeutic response increased Thinking  
 abnormal Thirst Thought blocking Throat irritation Throat  
 tightness Thrombocytopenia Thrombocytopenic purpura  
 Thrombocytosis Thrombophlebitis Thrombosis Thrombotic  
 thrombocytopenic purpura Thyroid adenoma Thyroid cancer  
 Thyroid neoplasm Thyroiditis Tic Tinnitus Tongue  
 discolouration Tongue disorder Tongue dry Tongue oedema  
 Tongue paralysis Tongue spasm Tongue ulceration Tonsillar  
 hypertrophy Tonsillitis Tooth abscess Tooth disorder Tooth  
 impacted Tooth infection Toothache Torsade de pointes  
 Torticollis Toxic epidermal necrolysis Tracheobronchitis  
 Transaminases increased Transient ischaemic attack  
 Tremor Trismus Tuberculin test positive  
 Tubulointerstitial nephritis Ulcer Ulcer haemorrhage Umbilical  
 hernia Unevaluable event Unintended pregnancy Unresponsive to  
 stimuli Upper respiratory tract infection Upper-airway cough  
 syndrome Urethral disorder Urethral pain Urethritis Urinary  
 hesitation Urinary incontinence Urinary retention Urinary tract  
 disorder Urinary tract infection Urine abnormality Urine  
 analysis abnormal Urine output increased Urosepsis Urticaria  
 Uterine disorder Uterine haemorrhage Uterine leiomyoma  
 Uterine neoplasm Uterovaginal prolapse VIIth nerve paralysis



Vaginal discharge Vaginal haemorrhage Vaginal infection  
 Vaginal inflammation Varicose vein Vascular purpura  
 Vasculitis Vasoconstriction Vasodilation procedure Vasospasm  
 Vein disorder Venous thrombosis Ventricular extrasystoles  
 Ventricular failure Ventricular fibrillation Ventricular  
 hypertrophy Ventricular tachycardia Vertigo Vestibular ataxia  
 Vestibular disorder Viral diarrhoea Viral infection  
 Vision blurred Visual acuity reduced Visual impairment  
 Vitamin B12 deficiency Vitreous detachment Vitreous disorder  
 Vitreous floaters Vocal cord paralysis Vomiting  
 Vulvovaginal candidiasis Vulvovaginal dryness  
 Vulvovaginal mycotic infection Vulvovaginal pruritus  
 Vulvovaginitis Water intoxication Weight decreased  
 Weight fluctuation Weight increased Wheezing White blood  
 cell count decreased White blood cell count increased White blood  
 cells urine positive Withdrawal bleed Withdrawal hypertension  
 Withdrawal syndrome Wound infection Xerophthalmia  
 Xerosis Yawning

\*\*\*\*\*  
 \*\*\*\*\*

Sodium-dependent noradrenaline transporter - Group: Transporter

Treated with:

phentermine: illicit, approved small molecule (21 associated  
 side effects) For the treatment and management of obesity.

tramadol: approved small molecule (490 associated side  
 effects) Indicated in the treatment of moderate to severe pain.  
 Consider for those prone to constipation or respiratory depression.  
 Tramadol is used to treat postoperative, dental, cancer, and acute  
 musculoskeletal pain and as an adjuvant to NSAID therapy in patients  
 with osteoarthritis.

guanadrel sulfate: approved small molecule (0 associated  
 side effects) Used to treat and control hypertension.

reboxetine: approved small molecule (0 associated side effects)  
 For the treatment of clinical depression.

venlafaxine: approved small molecule (507 associated side  
 effects) For the management of major depressive disorder (MDD),  
 generalized anxiety disorder (GAD), social anxiety disorder (social  
 phobia), panic disorder with or without agoraphobia, and vasomotor  
 symptoms in women with breast cancer and in postmenopausal women.

atomoxetine: approved small molecule (140 associated side  
 effects) For the treatment of Attention-Deficit/Hyperactivity  
 Disorder (ADHD) alone or in combination with behavioral treatment,  
 as an adjunct to psychological, educational, social, and other  
 remedial measures.

amitriptyline: approved small molecule (109 associated side  
 effects) For the treatment of depression, chronic pain, irritable  
 bowel syndrome, sleep disorders, diabetic neuropathy, agitation and  
 insomnia, and migraine prophylaxis.

protriptyline: approved small molecule (92 associated side  
 effects) For the treatment of depression.

norepinephrine: approved small molecule (22 associated side  
 effects) Mainly used to treat patients in vasodilatory shock  
 states such as septic shock and neurogenic shock and has shown a  
 survival benefit over dopamine. Also used as a vasopressor  
 medication for patients with critical hypotension.

methylphenidate: approved small molecule (262 associated side effects) For use as an integral part of a total treatment program which typically includes other remedial measures (psychological, educational, social) for a stabilizing effect in children with a behavioral syndrome characterized by the following group of developmentally inappropriate symptoms: moderate-to-severe distractibility, short attention span, hyperactivity, emotional lability, and impulsivity.

imipramine: approved small molecule (100 associated side effects) For the relief of symptoms of depression and as temporary adjunctive therapy in reducing enuresis in children aged 6 years and older. May also be used to manage panic disorders, with or without agoraphobia, as a second line agent in ADHD, management of eating disorders, for short-term management of acute depressive episodes in bipolar disorder and schizophrenia, and for symptomatic treatment of postherpetic neuralgia.

duloxetine: approved small molecule (269 associated side effects) For the acute and maintenance treatment of major depressive disorder (MDD), as well as acute management of generalized anxiety disorder. Also used for the management of neuropathic pain associated with diabetic peripheral neuropathy, and fibromyalgia. Has been used in the management of moderate to severe stress urinary incontinence (SUI) in women.

nortriptyline: approved small molecule (91 associated side effects) For the treatment of depression, chronic pain, irritable bowel syndrome, sleep disorders, diabetic neuropathy, agitation and insomnia, and migraine prophylaxis.

amoxapine: approved small molecule (103 associated side effects) For the relief of symptoms of depression in patients with neurotic or reactive depressive disorders as well as endogenous and psychotic depressions. May also be used to treat depression accompanied by anxiety or agitation.

mazindol: approved small molecule (0 associated side effects)

Used in short-term (a few weeks) treatment of exogenous obesity in conjunction with a regimen of weight reduction based on caloric restriction, exercise, and behavior modification in patients with a body mass index of 30 kg of body weight per height in meters squared ( $\text{kg/m}^2$ ) or in patients with a body mass index of 27  $\text{kg/m}^2$  in the presence of risk factors such as hypertension, diabetes, or hyperlipidemia.

ergotamine: approved small molecule (15 associated side effects)

For use as therapy to abort or prevent vascular headache, e.g., migraine, migraine variants, or so called "histaminic cephalalgia".

paroxetine: approved small molecule (505 associated side effects) Labeled indications include: major depressive disorder (MDD), panic disorder with or without agoraphobia, obsessive-compulsive disorder (OCD), social anxiety disorder (social phobia), generalized anxiety disorder (GAD), post-traumatic stress disorder (PTSD), and premenstrual dysphoric disorder (PMDD). Unlabeled indications include: eating disorders, impulse control disorders, vasomotor symptoms of menopause, obsessive-compulsive disorder (OCD) in children, and mild dementia-associated agitation in nonpsychotic individuals.

trimipramine: approved small molecule (0 associated side effects) For the treatment of depression and depression accompanied by anxiety, agitation or sleep disturbance

phenmetrazine: illicit,approved small molecule (0 associated side effects) Used as an anorectic in the treatment of obesity.

pseudoephedrine: approved small molecule (0 associated side effects) For the treatment of nasal congestion, sinus congestion, Eustachian tube congestion, and vasomotor rhinitis, and as an adjunct to other agents in the optimum treatment of allergic rhinitis, croup, sinusitis, otitis media, and tracheobronchitis. Also used as first-line therapy of priapism.

cocaine: illicit,approved small molecule (13 associated side effects) For the introduction of local (topical) anesthesia of accessible mucous membranes of the oral, laryngeal and nasal cavities.

maprotiline: approved small molecule (0 associated side effects) For treatment of depression, including the depressed phase of bipolar depression, psychotic depression, and involuntional melancholia, and may also be helpful in treating certain patients suffering severe depressive neurosis.

diethylpropion: illicit,approved small molecule (62 associated side effects) Used in the management of exogenous obesity as a short-term adjunct (a few weeks) in a regimen of weight reduction based on caloric restriction.

sibutramine: illicit,approved,withdrawn small molecule (80 associated side effects) For the treatment of obesity.

chlorpheniramine:approved small molecule (47 associated side effects) For the treatment of rhinitis, urticaria, allergy, common cold, asthma and hay fever.

doxepin: approved small molecule (210 associated side effects) Labeled indications: depression and insomnia. Unlabeled indications: chronic and neuropathic pain, anxiety, idiopathic urticaria.

nefazodone: approved,withdrawn small molecule (246 associated side effects) For the treatment of depression.

desipramine: approved small molecule (120 associated side effects) For relief of symptoms in various depressive syndromes, especially endogenous depression. It has also been used to manage chronic peripheral neuropathic pain, as a second line agent for the management of anxiety disorders (e.g. panic disorder, generalized anxiety disorder), and as a second or third line agent in the ADHD management.

bupropion: approved small molecule (441 associated side effects) For the treatment of depression and as aid to smoking cessation.

guanethidine: approved small molecule (0 associated side effects) For the treatment of moderate and severe hypertension, either alone or as an adjunct, and for the treatment of renal hypertension.

orphenadrine: approved small molecule (28 associated side effects) Indicated for the treatment of Parkinson's disease.

escitalopram: approved small molecule (0 associated side effects) Labeled indications include major depressive disorder (MDD) and generalized anxiety disorder (GAD). Unlabeled indications

include treatment of mild dementia-associated agitation in nonpsychotic patients.

clomipramine: approved small molecule (349 associated side effects)

ephedra: approved,withdrawn,nutraceutical small molecule (0 associated side effects) Ephedra is widely used by athletes, despite a lack of evidence that it enhances athletic performance. Ephedra has also been used for weight loss.

ginkgo biloba: approved,nutraceutical small molecule (0 associated side effects) Appears to be effective in: alleviating age-related memory impairment in some elderly people with mild to moderate age-related memory or cognitive impairment; improving cognitive function in healthy young to middle-aged people; improving symptoms of Alzheimer's, vascular or mixed dementia; improving damage to the visual field in patients with normal tension glaucoma; decreasing the number of painful attacks in patients with Raynaud's syndrome; and may improve symptoms of vertigo and dizziness in some patients.

mmda: illicit,experimental small molecule (0 associated side effects) MDMA is a recreational drug. It has no current medical uses and is a Schedule I controlled substance in the USA at present.

3,4-methylenedioxymethamphetamine:illicit,experimental small molecule (0 associated side effects) Clinical trials are now testing the therapeutic potential of MDMA for post-traumatic stress disorder (PTSD) and anxiety associated with terminal cancer. MDMA is one of the four most widely used illicit drugs in the U.S.

dextroamphetamine: illicit,approved small molecule (0 associated side effects) Used to treat attention deficit hyperactivity disorder (ADHD).

phendimetrazine: illicit,approved small molecule (0 associated side effects) Used in the management of exogenous obesity as a short term adjunct (a few weeks) in a regimen of weight reduction based on caloric restriction.

nomifensine: withdrawn small molecule (0 associated side effects)

amineptine: illicit,withdrawnsmall molecule (0 associated side effects) For the treatment of depression.

debrisoquin: approved small molecule (0 associated side effects) For the treatment of moderate and severe hypertension, either alone or as an adjunct, and for the treatment of renal hypertension.

milnacipran: approved small molecule (110 associated side effects) Milnacipran is used to treat moderate to severe clinical depression and chronic pain.

mianserin: approved small molecule (0 associated side effects) For the treatment of depression.

droxidopa: approved small molecule (0 associated side effects) For treatment of neurogenic orthostatic hypotension (NOH)

associated with various disorders including Multiple System Atrophy, Familial Amyloid Polyneuropathy, hemodialysis induced hypotension and Parkinson's Disease. Also investigated for use/treatment in neurologic disorders, nephropathy, blood (blood forming organ disorders, unspecified), and dizzy/fainting spells.

desvenlafaxine: approved small molecule (83 associated side effects) Desvenlafaxine is indicated for the treatment of major depressive disorder in adults.

dexamethylphenidate: approved small molecule (262 associated side effects) Dexamethylphenidate is used as a treatment for ADHD, ideally in conjunction with psychological, educational, behavioral or other forms of treatment.

levonordefrin: approved small molecule (0 associated side effects) Used as a topical nasal decongestant and vasoconstrictor in dentistry.

1111 known side effects mediated through drugs targeting this protein:

5q minus syndrome  
 Abdominal discomfort Abdominal distension  
 Abdominal pain lower Abdominal pain upper Abdominal  
 tenderness Abnormal behaviour Abnormal dreams Abnormal faeces  
 Abscess Accommodation disorder Acidosis Acne Acute  
 coronary syndrome Acute myocardial infarction Adenocarcinoma  
 Adjustment disorder Adverse reaction Affect lability  
 Ageusia Aggression Agitation Agranulocytosis Akathisia  
 Akinesia Alanine aminotransferase decreased Alanine  
 aminotransferase increased Albuminuria Alcohol abuse Alcohol  
 intolerance Alcohol poisoning Alopecia Altered state of  
 consciousness Alveolitis allergic Amblyopia Amenorrhoea  
 Amnesia Amyotrophic lateral sclerosis Anaemia  
 Anaphylactic shock Anaphylactoid reaction Aneurysm Anger  
 Angina pectoris Angina unstable Angioedema Angiopathy Angle  
 closure glaucoma Anisocytosis Anorectal disorder Anorgasmia  
 Anosmia Antinuclear antibody positive Antisocial  
 behaviour Antisocial personality disorder Anuria Anxiety  
 Aortic aneurysm Aortic dissection Apathy Aphasia  
 Aphthous stomatitis Aplasia Aplastic anaemia Apnoea  
 Appendicitis Application site reaction Apraxia  
 Arrhythmia Arrhythmia supraventricular Arterial disorder  
 Arteritis Arthralgia Arthritis Arthropathy Asocial behaviour  
 Aspartate aminotransferase increased Assisted fertilisation  
 Asthenia Asthma Ataxia Atelectasis Atrial  
 fibrillation Atrial flutter Atrioventricular block  
 Atrioventricular block complete Atrioventricular block first  
 degree Atrophy Auricular swelling Azoospermia Azotaemia  
 Back disorder Back pain Bacteraemia Balanitis Basal cell  
 carcinoma Basophilia Benign breast neoplasm Benign neoplasm  
 Benign neoplasm of skin Biliary colic Biliary tract  
 disorder Bipolar I disorder Bipolar disorder Bladder  
 dilatation Bladder pain Bleeding time prolonged Blepharitis  
 Blepharospasm Blindness Blister Blood alkaline  
 phosphatase increased Blood amylase increased Blood bilirubin  
 increased Blood cholesterol increased Blood creatine phosphokinase  
 increased Blood creatinine increased Blood glucose abnormal Blood  
 glucose increased Blood lactate dehydrogenase increased Blood  
 potassium abnormal Blood potassium decreased Blood potassium  
 increased Blood pressure diastolic decreased Blood pressure  
 fluctuation Blood pressure increased Blood prolactin increased  
 Blood sodium increased Blood triglycerides increased Blood  
 urea increased Blood uric acid increased Body temperature

decreased Body temperature increased Bone disorder Bone pain  
Bradycardia Bradykinesia Brain oedema Breast atrophy  
Breast calcifications Breast cancer Breast cyst Breast  
discharge Breast disorder Breast engorgement Breast  
enlargement Breast feeding Breast neoplasm Breast pain Breast  
tenderness Breath odour Bronchitis Bronchospasm Bruxism  
Buccoglossal syndrome Bulimia nervosa Bundle branch block  
Bundle branch block right Burning sensation Bursitis  
Cachexia Calculus urinary Candidiasis Capillary fragility  
Cardiac arrest Cardiac death Cardiac disorder Cardiac  
failure Cardiac failure congestive Cardiac fibrillation  
Cardiac flutter Cardiac murmur Cardiac output decreased  
Cardiac valve disease Cardio-respiratory arrest  
Cardiomyopathy Cardiovascular disorder Carpal tunnel  
syndrome Cataract Catatonia Cellulitis Cerebral arteritis  
Cerebral haemorrhage Cerebral ischaemia Cerebrovascular  
accident Cerebrovascular disorder Cerumen impaction Cervical  
dysplasia Cervicitis Cervix disorder Change of bowel habit  
Cheilitis Chest discomfort Chest pain Chills Chloasma  
Cholecystitis Cholelithiasis Cholinergic syndrome  
Chondropathy Choreoathetosis Chromatopsia Chronic  
lymphocytic leukaemia Chronic obstructive pulmonary disease  
Circumoral oedema Cognitive disorder Cogwheel rigidity Cold  
sweat Colitis Colitis ulcerative Coma Coma hepatic  
Completed suicide Confusional state Congenital anomaly  
Conjunctival haemorrhage Conjunctival oedema  
Conjunctivitis Conjunctivitis infective Connective tissue  
disorder Constipation Conversion disorder Convulsion  
Coordination abnormal Corneal lesion Coronary artery  
disease Coronary artery occlusion Cough Crocodile tears  
syndrome Crying Crystal urine Crystalluria Cyanosis  
Cystitis Cystitis noninfective Cytolytic hepatitis  
Deafness Death Decreased appetite Deep vein thrombosis  
Defaecation urgency Deficiency anaemia Dehydration  
Delirium Delusion Dementia Dental caries Dependence  
Depersonalisation Depressed level of consciousness Depressed  
mood Depression suicidal Depressive symptom Derealisation  
Dermal cyst Dermatitis atopic Dermatitis bullous Dermatitis  
contact Dermatitis exfoliative Dermoid cyst Developmental  
delay Diabetes mellitus Diarrhoea Diarrhoea haemorrhagic Diplopia  
Discomfort Disorientation Dissociation Disturbance in  
attention Disturbance in sexual arousal Diverticulitis  
Diverticulum Dizziness Drug abuse Drug dependence Drug  
effect decreased Drug eruption Drug hypersensitivity Drug  
interaction Drug withdrawal syndrome Dry eye Dry mouth Dry  
skin Dry throat Duodenal ulcer Duodenal ulcer haemorrhage  
Duodenitis Dysarthria Dysgeusia Dyskinesia Dyslexia  
Dyslipidaemia Dysmenorrhoea Dyspareunia Dyspepsia  
Dysphagia Dysphonia Dysphoria Dysplasia Dyspnoea  
Dystonia Dysuria Ear congestion Ear discomfort Ear  
disorder Ear infection Ear pain Ecchymosis Eclampsia  
Eczema Effusion Ejaculation delayed Ejaculation  
disorder Ejaculation failure Electrocardiogram PR interval  
Electrocardiogram QRS complex Electrocardiogram QT  
prolonged Electrocardiogram abnormal Electrocardiogram change

Electroencephalogram abnormal      Elevated mood      Embolism  
 Emotional disorder      Emotional distress      Emphysema  
 Encephalopathy      Endocrine disorder      Endometrial disorder  
 Endometrial hyperplasia      Endometriosis      Energy increased  
 Enteritis      Enuresis      Eosinophil count increased  
 Eosinophilia      Epicondylitis      Epidermal necrosis  
 Epididymitis      Epigastric discomfort      Epilepsy      Epistaxis  
 Erectile dysfunction      Eructation      Erysipelas      Erythema  
 Erythema multiforme      Erythema nodosum      Euphoric mood  
 Eustachian tube disorder      Exophthalmos      Exostosis  
 Extrapyrarnidal disorder      Extrasystoles      Extravasation  
 Eye allergy      Eye disorder      Eye haemorrhage      Eye infection  
 Eye pain      Eyelid disorder      Eyelid ptosis      Face oedema  
 Faecal incontinence      Faecalith      Faecaloma      Faeces  
 discoloured      Fasciitis      Fasting      Fat intolerance      Fatigue  
 Feeling abnormal      Feeling cold      Feeling drunk      Feeling hot  
 Feeling jittery      Feeling of despair      Female sexual arousal  
 disorder      Female sexual dysfunction      Fibroadenoma of breast  
 Fibrocystic breast disease      Fibrosis      Flank pain      Flat affect  
 Flatulence      Fluid retention      Flushing      Folliculitis      Food  
 allergy      Frequent bowel movements      Fungal infection      Fungal skin  
 infection      Furuncle      Gait disturbance      Galactorrhoea      Gamma-  
 glutamyltransferase increased      Gangrene      Gastric dilatation  
 Gastric disorder      Gastric pH decreased      Gastric ulcer  
 Gastritis      Gastritis viral      Gastroenteritis      Gastrointestinal  
 disorder      Gastrointestinal haemorrhage      Gastrointestinal infection  
 Gastrointestinal obstruction      Gastrointestinal pain  
 Gastrointestinal tract irritation      Gastrointestinal ulcer  
 Gastrooesophageal reflux disease      Generalised oedema  
 Genital discharge      Genital disorder female      Genital disorder  
 male      Genital pain      Genital rash      Gingival bleeding      Gingival  
 hyperplasia      Gingival pain      Gingival recession      Gingivitis  
 Glaucoma      Globulins increased      Glomerulonephritis  
 membranous      Glossitis      Glycosuria      Goitre      Gout      Grand mal  
 convulsion      Granuloma      Gravitational oedema      Groin pain      Growth  
 retardation      Gynaecomastia      Haematemesis      Haematochezia  
 Haematocrit decreased      Haematocrit increased      Haematoma  
 Haematuria      Haemochromatosis      Haemoglobin decreased      Haemoglobin  
 increased      Haemoglobinuria      Haemolytic anaemia      Haemoptysis  
 Haemorrhage      Haemorrhagic disorder      Haemorrhoids      Hair colour  
 changes      Hair disorder      Hallucination      Hallucination,  
 auditory      Hallucination, tactile      Hallucination, visual      Hangover  
 Headache      Hearing impaired      Heart rate irregular      Heat rash  
 Helicobacter infection      Hemiparesis      Hepatic cirrhosis      Hepatic  
 enzyme increased      Hepatic failure      Hepatic function abnormal  
 Hepatic necrosis      Hepatic steatosis      Hepatitis      Hepatitis C  
 Hepatitis fulminant      Hepatobiliary disease      Hepatocellular  
 injury      Hepatosplenomegaly      Hernia      Herpes simplex  
 Herpes virus infection      Herpes zoster      Hiccups      High  
 density lipoprotein decreased      Hirsutism      Homicidal ideation  
 Hordeolum      Hormone level abnormal      Hostility      Hot flush  
 Hunger      Hyperacusis      Hyperaemia      Hyperaesthesia  
 Hyperbilirubinaemia      Hypercalcaemia      Hypercalciuria  
 Hyperchlorhydria      Hypercholesterolaemia      Hyperglycaemia  
 Hyperhidrosis      Hyperkalaemia      Hyperkeratosis

Hyperkinesia      Hyperlipidaemia      Hypermagnesaemia      Hyperpathia  
 Hyperphosphataemia      Hyperplasia      Hyperprolactinaemia  
 Hyperpyrexia      Hyperreflexia      Hypersensitivity  
 Hypertension      Hypertensive crisis      Hyperthermia  
 Hyperthyroidism      Hypertonia      Hypertonic bladder  
 Hypertrichosis      Hypertriglyceridaemia      Hypertrophy  
 Hyperuricaemia      Hyperventilation      Hypervigilance      Hypnagogic  
 hallucination      Hypoaesthesia      Hypoaesthesia oral  
 Hypocalcaemia      Hypocholesterolaemia      Hypochromic anaemia  
 Hypoglycaemia      Hypohidrosis      Hypokalaemia      Hypokinesia  
 Hypomania      Hypomenorrhoea      Hyponatraemia      Hypophosphataemia  
 Hypoproteinaemia      Hyporeflexia      Hypotension      Hypothermia  
 Hypothyroidism      Hypotonia      Hypotrichosis      Hypoventilation  
 Hypovolaemia      Hypoxia      IIIrd nerve paralysis      Ileitis  
 Ileus paralytic      Ill-defined disorder      Illusion      Immune  
 system disorder      Immunoglobulins increased      Impaired gastric  
 emptying      Impaired healing      Inappropriate antidiuretic hormone  
 secretion      Incontinence      Increased appetite      Increased  
 bronchial secretion      Increased tendency to bruise      Induration  
     Infarction      Infection      Infection susceptibility increased  
     Infertility female      Infestation      Inflammation      Influenza  
     Influenza like illness      Infrequent bowel movements      Ingrowing  
 nail      Inguinal hernia      Initial insomnia      Inner ear disorder  
     Insomnia      Interstitial lung disease      Intestinal functional  
 disorder      Intestinal obstruction      Intestinal perforation      Intraocular  
 pressure increased      Iron deficiency      Iron deficiency anaemia  
     Irritability      Irritable bowel syndrome      Ischaemia  
     Jaundice      Joint crepitation      Joint range of motion decreased  
     Joint stiffness      Joint swelling      Keratitis  
     Keratoconjunctivitis sicca      Ketosis      Labyrinthitis  
     Lacrimal disorder      Lacrimation decreased      Lacrimation increased  
     Lactic acidosis      Laryngeal disorder      Laryngeal oedema  
     Laryngitis      Laryngospasm      Latex allergy      Leiomyoma  
     Lethargy      Leukaemia      Leukaemoid reaction      Leukocytosis  
     Leukoderma      Leukopenia      Libido decreased      Libido increased  
     Lichenoid keratosis      Lip blister      Lip dry      Liver disorder  
     Liver function test abnormal      Liver injury      Liver tenderness  
     Local reaction      Localised infection      Localised oedema      Loss  
 of consciousness      Loss of libido      Low density lipoprotein increased  
     Lower respiratory tract infection      Lung adenocarcinoma stage I  
     Lung disorder      Lymphadenitis      Lymphadenopathy      Lymphocyte  
 count abnormal      Lymphocyte count decreased      Lymphocyte count  
 increased      Lymphocytic leukaemia      Lymphocytosis      Lymphoedema  
     Lymphoma      Lymphopenia      Macular degeneration      Maculopathy      Major  
 depression      Malaise      Male sexual dysfunction      Malignant  
 melanoma      Mammogram abnormal      Mania      Mass      Mastitis      Mediastinal  
 disorder      Melaena      Memory impairment      Meningitis      Menometrorrhagia  
     Menopausal symptoms      Menopause      Menorrhagia      Menstrual  
 disorder      Menstruation delayed      Menstruation irregular      Mental  
 disability      Mental disorder      Mental retardation      Mental status  
 changes      Metrorrhagia      Microcytic anaemia      Micturition  
 disorder      Micturition urgency      Middle insomnia      Migraine  
     Miosis      Mitral valve disease      Monocyte count increased  
     Monocytosis      Mood swings      Motion sickness      Mouth ulceration  
     Mucous membrane disorder      Multiple myeloma      Muscle



contractions involuntary      Muscle contracture      Muscle relaxant  
 therapy      Muscle rigidity      Muscle spasms      Muscle spasticity  
 Muscle tightness      Muscle twitching      Muscular weakness  
 Musculoskeletal chest pain      Musculoskeletal discomfort  
 Musculoskeletal disorder      Musculoskeletal pain  
 Musculoskeletal stiffness      Mutism      Myalgia      Mydriasis  
 Myelitis      Myocardial infarction      Myocardial ischaemia  
 Myoclonus      Myopathy      Myositis      Nail disorder      Nasal  
 congestion      Nasal dryness      Nasal oedema      Nasopharyngitis  
 Nausea      Neck pain      Necrosis      Negativism      Neoplasm  
 Neoplasm malignant      Nephritis      Nephrolithiasis      Nephropathy  
 Nervous system disorder      Nervousness      Neuralgia      Neuritis  
 Neuroleptic malignant syndrome      Neuropathy peripheral  
 Neurosis      Neutropenia      Neutrophil count decreased      Neutrophil  
 count increased      Night blindness      Night sweats      Nightmare  
 Nipple pain      Nocturia      Nodal arrhythmia      Nodule  
 Normochromic normocytic anaemia      Nuchal rigidity      Nystagmus  
 Obesity      Obstruction      Ocular hyperaemia      Oculogyric crisis  
 Oedema mouth      Oedema peripheral      Oesophageal achalasia  
 Oesophageal disorder      Oesophageal spasm      Oesophageal stenosis  
 Oesophagitis      Oliguria      Onychoclasia      Onychomycosis  
 Optic neuritis      Oral candidiasis      Oral pain      Orchitis  
 noninfective      Orgasm abnormal      Oropharyngeal discomfort  
 Oropharyngeal pain      Orthostatic hypotension  
 Osteoarthritis      Osteopenia      Osteoporosis      Osteosclerosis  
 Otitis externa      Otitis media      Ovarian cyst      Ovarian  
 disorder      Pain in extremity      Pain in jaw      Painful erection      Pallor  
 Palpitations      Pancreatitis      Pancreatitis acute  
 Pancytopenia      Panic attack      Panic reaction  
 Papilloedema      Papule      Paraesthesia      Paraesthesia oral  
 Paralysis      Paranoia      Paresis      Parkinsonism      Parosmia  
 Parotid gland enlargement      Parotitis      Pathological fracture  
 Pelvic infection      Pelvic pain      Penis disorder      Peptic ulcer  
 Perineal pain      Periodontitis      Peripheral coldness  
 Peripheral ischaemia      Peripheral vascular disorder      Peritonitis  
 Perseveration      Personality change      Petechiae      Pharyngeal  
 disorder      Pharyngeal oedema      Pharyngitis      Pharyngitis streptococcal  
 Phlebitis      Phobia      Photophobia      Photopsia      Photosensitivity  
 reaction      Piloerection      Plantar fasciitis      Plasmacytoma  
 Platelet count decreased      Pleurisy      Pleuritic pain  
 Pneumonia      Poisoning      Pollakiuria      Polyarteritis nodosa  
 Polycythaemia vera      Polyp      Polyuria      Poor peripheral  
 circulation      Porphyria      Postpartum disorder      Pregnancy      Premature  
 baby      Premature delivery      Premature ejaculation      Premenstrual  
 syndrome      Pressure of speech      Presyncope      Priapism      Procedural  
 pain      Proctitis      Productive cough      Prostate cancer      Prostate  
 infection      Prostatic disorder      Prostatism      Prostatitis  
 Prostatomegaly      Protein total decreased      Protein urine  
 present      Proteinuria      Prurigo      Pruritus      Pruritus generalised  
 Pruritus genital      Psoriasis      Psychomotor retardation  
 Psychosomatic disease      Psychotic disorder      Pulmonary  
 arterial hypertension      Pulmonary congestion      Pulmonary embolism  
 Pulmonary eosinophilia      Pulmonary fibrosis      Pulmonary  
 function test decreased      Pulmonary hypertension      Pulmonary oedema  
 Pulse absent      Pupils unequal      Purpura      Pyelonephritis

Pyuria Rales Rash Rash erythematous Rash macular Rash  
 maculo-papular Rash pustular Raynaud's phenomenon Rectal  
 haemorrhage Rectal prolapse Red blood cell abnormality Red blood  
 cell count decreased Red blood cell count increased Red blood  
 cell sedimentation rate increased Renal cyst Renal failure Renal  
 failure acute Renal impairment Renal pain Reproductive tract  
 disorder Respiration abnormal Respiratory depression Respiratory  
 disorder Respiratory failure Respiratory tract congestion  
 Respiratory tract infection viral Restless legs syndrome  
 Retching Retinal detachment Retinal disorder Retinal  
 haemorrhage Retinitis pigmentosa Reversible ischaemic neurological  
 deficit Rhabdomyolysis Rheumatoid arthritis Rhinitis  
 Rhinitis allergic Rhinitis seasonal Rhinorrhoea Rhonchi  
 Rosacea Salivary gland enlargement Salivary  
 hypersecretion Salpingitis Scab Schizophrenia Schizophreniform  
 disorder Sciatica Scleral haemorrhage Scleritis Scotoma  
 Scrotal pain Seasonal allergy Sebaceous gland disorder  
 Seborrhoeic dermatitis Sedation Sensation of foreign body  
 Sensation of heaviness Sensitisation Sensory disturbance  
 Sensory loss Sepsis Serum sickness Sexual  
 dysfunction Shock Sialoadenitis Sicca syndrome Sinus arrhythmia  
 Sinus bradycardia Sinus congestion Sinus disorder Sinus  
 headache Sinus tachycardia Sinusitis Skin atrophy Skin  
 discolouration Skin disorder Skin exfoliation Skin  
 hyperpigmentation Skin hypertrophy Skin irritation Skin odour  
 abnormal Skin striae Skin ulcer Sleep apnoea syndrome Sleep  
 disorder Sleep paralysis Sluggishness Small intestinal  
 obstruction Sneezing Snoring Social avoidant behaviour  
 Somnambulism Somnolence Speech disorder Sputum increased  
 Status epilepticus Stevens-Johnson syndrome Sticky skin  
 Stomach dilation procedure Stomatitis Strabismus Stress  
 Stridor Stupor Sudden cardiac death Sudden death  
 Suicidal behaviour Suicidal ideation Suicide attempt  
 Supraventricular extrasystoles Supraventricular tachycardia  
 Swelling Swelling face Syncope Synovial cyst  
 Systemic lupus erythematosus Tachycardia Tardive dyskinesia  
 Tearfulness Tenderness Tendinous contracture Tendon disorder  
 Tendonitis Tenosynovitis Tension Tension headache  
 Teratogenicity Terminal insomnia Testicular disorder  
 Testicular pain Testicular swelling Tetany Therapeutic  
 response decreased Thinking abnormal Thirst Throat irritation  
 Throat tightness Thrombocytopenia Thrombocytopenic purpura  
 Thrombocytosis Thrombophlebitis Thrombosis Thyroid neoplasm  
 Thyroiditis Tic Tinea infection Tinea pedis Tinnitus  
 Tobacco user Tongue discolouration Tongue disorder  
 Tongue oedema Tongue ulceration Tonsillitis Tooth abscess  
 Tooth disorder Tooth impacted Tooth infection Tooth  
 malformation Toothache Torsade de pointes Torticollis Toxic  
 epidermal necrolysis Tracheal disorder Tracheitis Transaminases  
 increased Tremor Trichotillomania Trismus Type IV  
 hypersensitivity reaction Ulcer Ulcer haemorrhage Ulcerative  
 keratitis Unintended pregnancy Upper respiratory tract infection  
 Urethral disorder Urethral pain Urethritis Urinary  
 hesitation Urinary incontinence Urinary retention Urinary tract  
 disorder Urinary tract infection Urine abnormality Urine

analysis abnormal Urine flow decreased Urine odour abnormal Urine output increased Urogenital disorder Urticaria Uterine haemorrhage Uterine inflammation Uterine leiomyoma Uterine neoplasm Uterine spasm Uterovaginal prolapse Uveitis VIIth nerve paralysis Vaginal cyst Vaginal discharge Vaginal haemorrhage Vaginal infection Vaginal inflammation Vaginitis bacterial Varicose vein Vascular headache Vascular insufficiency Vascular purpura Vasculitis Vasculitis necrotising Vasoconstriction Vasodilation procedure Vasospasm Venous insufficiency Venous thrombosis Ventricular extrasystoles Ventricular fibrillation Ventricular tachycardia Vertigo Vestibular disorder Viral diarrhoea Viral infection Vision blurred Visual acuity reduced Visual impairment Vitreous disorder Vitreous floaters Vocal cord disorder Vomiting Vulval disorder Vulvovaginal candidiasis Vulvovaginal discomfort Vulvovaginal dryness Vulvovaginal mycotic infection Waxy flexibility Weight decreased Weight increased Wheezing White blood cell count abnormal White blood cell count increased White blood cell disorder Withdrawal syndrome Wound haemorrhage Wound infection Yawning

\*\*\*\*\*  
\*\*\*\*\*

C-X-C chemokine receptor type 4 - Group: Receptor

Treated with:

framycetin: approved small molecule (0 associated side effects)

For the treatment of bacterial blepharitis, bacterial conjunctivitis, corneal injuries, corneal ulcers and meibomianitis. For the prophylaxis of ocular infections following foreign body removal

plerixafor: approved small molecule (0 associated side effects)

Used in combination with granulocyte-colony stimulating factor (G-CSF) to mobilize hematopoietic stem cells to the peripheral blood for collection and subsequent autologous transplantation in patients with non-Hodgkin's lymphoma (NHL) and multiple myeloma (MM).

known side effects mediated through drugs targeting this protein:

\*\*\*\*\*  
\*\*\*\*\*

Cationic amino acid transporter 4 - Group: Transporter

Treated with:

L-lysine: approved, nutraceutical small molecule (0 associated side effects) Supplemental L-lysine has putative anti-herpes simplex virus activity. There is preliminary research suggesting that it may have some anti-osteoporotic activity.

L-arginine: approved, nutraceutical small molecule (20 associated side effects) Used for nutritional supplementation, also for treating dietary shortage or imbalance.

L-ornithine: approved, nutraceutical small molecule (0 associated side effects) Used for nutritional supplementation, also for treating dietary shortage or imbalance. It has been claimed that ornithine improves athletic performance, has anabolic effects, has wound-healing effects, and is immuno-enhancing.

20 known side effects mediated through drugs targeting this protein:  
 Anaphylactic shock      Cyanosis      Dermatitis      Extravasation  
     Flushing      Haematuria      Headache      Hypersensitivity  
     Hypoaesthesia      Nausea      Necrosis      Platelet count  
 decreased      Rash      Rash macular      Sensory loss      Skin exfoliation  
     Skin necrosis      Surgery      Swelling      Vomiting

\*\*\*\*\*  
 \*\*\*\*\*

Gonadotropin-releasing hormone receptor - Group: Receptor

Treated with:

leuprolide: approved      biotech      (0 associated side effects) For treatment of prostate cancer, endometriosis, uterine fibroids and premature puberty

goserelin: approved      small molecule      (0 associated side effects)  
 Used to treat hormone-sensitive cancers of the breast (in pre- and peri- menopausal women) and prostate, and some benign gynaecological disorders (endometriosis, uterine fibroids and endometrial thinning). In addition, goserelin is used in assisted reproduction and in the treatment of precocious puberty.

cetorelix: approved      small molecule      (30 associated side effects)

For the inhibition of premature LH surges in women undergoing controlled ovarian stimulation

abarelix: approved, withdrawn      biotech      (1 associated side effects) For palliative treatment of advanced prostate cancer.

gonadorelin: approved      small molecule      (0 associated side effects) For evaluating the functional capacity and response of the gonadotropes of the anterior pituitary also for evaluating residual gonadotropic function of the pituitary following removal of a pituitary tumor by surgery and/or irradiation.

nafarelin: approved      small molecule      (0 associated side effects)

For treatment of central precocious puberty (true precocious puberty, GnRH-dependent precocious precocity, complete isosexual precocity) in children of both sexes and for the treatment of endometriosis.

danazol: approved      small molecule      (89 associated side effects)

For the treatment of endometriosis and fibrocystic breast disease (in patients unresponsive to simple measures). Also used for the prophylactic treatment of all types of hereditary angioedema in males and females.

degarelix: approved      small molecule      (32 associated side effects)

Degaralix is used for the management of advanced prostate cancer. Its action ultimately results in a reduction in circulating androgens, which provides a therapeutic benefit by reducing the growth stimulus used by hormone-sensitive malignant prostate tissue.

buserelin: approved      biotech      (0 associated side effects)

131 known side effects mediated through drugs targeting this protein:

Acne      Acute coronary syndrome      Adenoma benign      Affect lability  
     Alopecia      Amenorrhoea      Anaphylactic shock      Anaphylactoid  
 reaction      Anencephaly      Anxiety      Arthralgia      Ascites      Assisted  
 fertilisation      Asthenia      Atrophy      Back pain      Benign  
 intracranial hypertension      Blood insulin increased      Body  
 temperature increased      Bone density decreased      Breast discharge  
     Cardiac septal defect      Carpal tunnel syndrome      Cataract

Chills            Congenital anomaly            Constipation            Convulsion  
 Dermatitis    Developmental delay            Developmental glaucoma  
 Diaphragmatic hernia    Diarrhoea            Dizziness            Dysphonia  
 Eosinophilia            Erectile dysfunction            Erythema            Erythema  
 multifforme    Fatigue            Fluid retention            Flushing            Gastroenteritis  
 Gingival bleeding    Glaucoma            Gynaecomastia            Haematuria  
 Haemoglobin    Haemorrhage            Headache            Hepatic adenoma            Hepatic  
 function abnormal    Hepatic neoplasm            Hernia            Hirsutism            Hot flush  
 Hyperhidrosis            Hyperinsulinism            Hypersensitivity  
 Hypertension            Hypertrophy            Hypovolaemia            Imperforate hymen  
 Induration            Infarction            Infection            Injection site reaction  
 Insomnia            Interstitial lung disease            Intracranial pressure  
 increased            Jaundice            Jaundice cholestatic            Joint swelling  
 Klinefelter's syndrome            Laboratory test abnormal  
 Leukocytosis            Leukopenia            Loss of consciousness            Melanocytic  
 naevus            Menopausal symptoms            Metrorrhagia            Mood swings  
 Muscle spasms            Musculoskeletal discomfort            Myocardial  
 infarction            Nasal congestion            Nausea            Neoplasm            Nervousness            Night  
 sweats            Nodule            Oedema            Oliguria            Oropharyngeal  
 discomfort            Oropharyngeal pain            Ovarian hyperstimulation syndrome  
 Pain            Palpitations            Pancreatitis            Paraesthesia  
 Peliosis hepatis            Pelvic pain            Photosensitivity reaction  
 Pneumonia            Polycythaemia            Pruritus            Purpura            Rash  
 Seborrhoeic dermatitis            Shock            Sleep disorder            Stillbirth  
 Strabismus            Supernumerary nipple            Swelling            Syncope  
 Tachycardia            Tension            Testicular atrophy            Thrombocytopenia  
 Tremor            Trisomy 18            Trisomy 21            Urinary tract infection  
 Urticaria            Vascular purpura            Ventricular septal defect  
 Visual impairment            Vomiting            Vulvovaginal dryness            Weight

increased

\*\*\*\*\*  
\*\*\*\*\*

Voltage-dependent T-type calcium channel subunit alpha-1I - Group:  
Channel

Treated with:

cinnarizine:            approved            small molecule            (0 associated side effects)            For the treatment of vertigo/meniere's disease, nausea and vomiting, motion sickness and also useful for vestibular symptoms of other origins.

paramethadione:            approved            small molecule            (0 associated side effects)            Used for the control of absence (petit mal) seizures that are refractory to treatment with other medications.

verapamil:            approved            small molecule            (113 associated side effects)            For the treatment of hypertension, angina, and cluster headache prophylaxis.

zonisamide:            approved            small molecule            (190 associated side effects)            For use as adjunctive treatment of partial seizures in adults with epilepsy.

mibefradil:            withdrawn            small molecule            (0 associated side effects)            For the treatment of angina and high blood pressure.

flunarizine:            approved            small molecule            (0 associated side effects)            Used in the prophylaxis of migraine, occlusive peripheral vascular disease, vertigo of central and peripheral origin, and as an adjuvant in the therapy of epilepsy.

246 known side effects mediated through drugs targeting this protein:

Abdominal discomfort Abdominal pain Abnormal dreams Acne Acute coronary syndrome Agitation Alanine aminotransferase increased Albuminuria Alopecia Amblyopia Amenorrhoea Anaemia Anaphylactic shock Angioedema Anxiety Apnoea Arthralgia Arthritis Aspartate aminotransferase increased Asthenia Ataxia Atrial fibrillation Atrioventricular block Atrioventricular block complete Atrioventricular dissociation Balance disorder Bladder pain Blindness Blood lactate dehydrogenase increased Blood prolactin increased Bradycardia Bronchospasm Calculus bladder Cardiac failure Cardiac fibrillation Cardiomyopathy Cerebrovascular accident Chest pain Cholangitis Cholecystitis Cholelithiasis Cholestasis Cognitive disorder Colitis Confusional state Conjunctivitis Constipation Convulsion Coordination abnormal Cough Deafness Decreased appetite Dehydration Depressed level of consciousness Depressive symptom Dermatitis Dermatitis bullous Diarrhoea Diplopia Discomfort Dissociation Disturbance in sexual arousal Dizziness Dry mouth Dry skin Duodenal ulcer Duodenitis Dysarthria Dysgeusia Dyskinesia Dyspepsia Dysphagia Dyspnoea Dystonia Dysuria Ecchymosis Eczema Electrocardiogram abnormal Embolism Encephalopathy Enuresis Erectile dysfunction Erythema Erythema multiforme Euphoric mood Extrapyrarnidal disorder Extrasystoles Face oedema Faecal incontinence Fatigue Feeling abnormal Feeling cold Flank pain Flatulence Flushing Gait disturbance Galactorrhoea Gastritis Gastroenteritis Gastrointestinal pain Gingival bleeding Gingival hyperplasia Gingivitis Glaucoma Glossitis Gynaecomastia Haematemesis Haematuria Haemoglobin Haemoptysis Haemorrhage Headache Hepatic enzyme increased Hepatitis Hirsutism Hyperaesthesia Hyperhidrosis Hyperkeratosis Hyperkinesia Hyperplasia Hyperprolactinaemia Hyperreflexia Hypersensitivity Hypertension Hypertonia Hypertrophic cardiomyopathy Hypertrophy Hypoaesthesia Hypoglycaemia Hypokinesia Hyponatraemia Hypotension Hypotonia Ileus paralytic Ill-defined disorder Immunodeficiency Incontinence Infection Influenza Insomnia Intermittent claudication Iritis Irritability Jaundice Jaundice cholestatic Joint swelling Laryngospasm Lethargy Leukopenia Libido decreased Loss of consciousness Lymphadenopathy Macule Malaise Mastitis Melaena Menorrhagia Microcytic anaemia Micturition urgency Mouth ulceration Movement disorder Muscle fatigue Muscle relaxant therapy Muscle rigidity Muscle spasms Muscle twitching Muscular weakness Musculoskeletal discomfort Musculoskeletal stiffness Myalgia Myocardial infarction Myoclonus Nausea Nervousness Neuritis Neuropathy peripheral Nocturia Nuchal rigidity Nystagmus Oculogyric crisis Oedema Oedema peripheral Oesophagitis Oligomenorrhoea Orthostatic hypotension Osteoarthritis Pain Palpitations Paraesthesia Paraesthesia oral Paralysis Parosmia Petechiae Pharyngitis

Photophobia Pollakiuria Polyuria Pruritus Psychotic  
 disorder Pulmonary embolism Pulmonary oedema Purpura  
 Quadriparesis Rash Rash maculo-papular Rash pustular  
 Rectal haemorrhage Respiratory failure Respiratory tract  
 infection Rhinitis Scotoma Sensory loss Shock Sinus  
 arrest Sinusitis Sleep disorder Somnolence Speech disorder  
 Stomatitis Syncope Systemic lupus erythematosus Tachycardia  
 Tension Thirst Thrombocytopenia Thrombophlebitis  
 Tinnitus Tremor Ulcer Upper respiratory tract infection  
 Urinary incontinence Urinary retention Urine output increased  
 Urticaria VIIth nerve paralysis Vascular insufficiency  
 Vascular purpura Vasculitis Ventricular extrasystoles  
 Vertigo Vision blurred Visual acuity reduced Visual  
 impairment Vomiting Weight decreased Weight increased

\*\*\*\*\*  
 \*\*\*\*\*

Scavenger receptor class B member 1 - Group: Receptor

Treated with:

phosphatidylserine: approved, nutraceutical small molecule (0  
 associated side effects) Phosphatidylserine has demonstrated  
 some usefulness in treating cognitive impairment, including  
 Alzheimer's disease, age-associated memory impairment and some non-  
 Alzheimer's dementias. More research is needed before  
 phosphatidylserine can be indicated for immune enhancement or for  
 reduction of exercise stress.

known side effects mediated through drugs targeting this protein:

\*\*\*\*\*  
 \*\*\*\*\*

Probable outer membrane protein - Group: Other

Treated with:

(hydroxyethyloxy)tri(ethyloxy)octane: experimental small  
 molecule (0 associated side effects)

known side effects mediated through drugs targeting this protein:

\*\*\*\*\*  
 \*\*\*\*\*

Prostacyclin receptor - Group: Receptor

Treated with:

treprostinil: approved small molecule (92 associated side  
 effects) For use as a continuous subcutaneous infusion or  
 intravenous infusion (for those not able to tolerate a subcutaneous  
 infusion) for the treatment of pulmonary arterial hypertension in  
 patients with NYHA Class II-IV symptoms to diminish symptoms  
 associated with exercise.

iloprost: approved small molecule (46 associated side effects)  
 Used for the treatment of pulmonary arterial hypertension.

dinoprost tromethamine: approved small molecule (0  
 associated side effects) Used for aborting second-trimester  
 pregnancy (between the twelfth to eighteenth week of gestation) and  
 in incomplete abortion or for therapeutic abortion in cases of  
 intrauterine fetal death and congenital abnormalities incompatible  
 with life. Also used at low-doses for medically indicated induction

of labor at term. Also injected intra-arterially for use as a vasodilator to assist in angiography.

epoprostenol: approved small molecule (0 associated side effects) For the long-term intravenous treatment of primary pulmonary hypertension and pulmonary hypertension associated with the scleroderma spectrum of disease in NYHA Class III and Class IV patients who do not respond adequately to conventional therapy.

104 known side effects mediated through drugs targeting this protein:

Abdominal pain Anaemia Anxiety Arthralgia Asthenia Back pain  
Blood alkaline phosphatase increased Blood culture positive  
Body temperature increased Bone pain Bradycardia Bronchitis  
Bronchospasm Cardiac failure Cardiac failure congestive  
Cellulitis Chest pain Cough Decreased appetite Dehydration  
Dermatitis Diarrhoea Discomfort Disease progression  
Dizziness Dysgeusia Dyspepsia Dyspnoea Ecchymosis  
Embolism Epistaxis Erythema Fatigue Feeling abnormal  
Flushing Gamma-glutamyltransferase increased  
Gastrointestinal pain Gingival bleeding Glossitis Glossodynia  
Gout Haematoma Haematuria Haemoglobin Haemoptysis Haemorrhage  
Headache Hypersensitivity Hypokalaemia Hypotension  
Hypoxia Ill-defined disorder Induration Influenza  
Infusion site reaction Insomnia Laboratory test abnormal  
Loss of consciousness Malaise Melaena Muscle spasms  
Musculoskeletal discomfort Myalgia Nausea Neck pain  
Nervousness Oedema Oedema peripheral Oropharyngeal pain  
Pain Pain in extremity Pain in jaw Pallor Palpitations  
Paraesthesia Pharyngitis Pneumonia Pruritus Pseudomonal  
sepsis Pseudomonas infection Pulmonary embolism Pulmonary  
hypertension Rash Rectal haemorrhage Renal failure  
Rhinitis Sepsis Shock Sinusitis Supraventricular  
tachycardia Swelling Syncope Tachycardia Tension Throat  
irritation Thrombocytopenia Thrombophlebitis Thrombosis Trismus  
Urinary tract infection Vasodilation procedure Viral  
infection Vomiting Wheezing

\*\*\*\*\*  
\*\*\*\*\*

Ferripyoverdine receptor - Group: Transporter

Treated with:

pyoverdine-chromophore: experimental small molecule (0 associated side effects)  
3,6,9,12,15-pentaoxatricosan-1-ol: experimental small molecule (0 associated side effects)

known side effects mediated through drugs targeting this protein:

\*\*\*\*\*  
\*\*\*\*\*

Glutamate receptor, ionotropic kainate 1 - Group: Channel

Treated with:

l-glutamic acid: approved, nutraceutical small molecule (0 associated side effects) Considered to be nature's "Brain food" by improving mental capacities; helps speed the healing of ulcers;



gives a "lift" from fatigue; helps control alcoholism, schizophrenia and the craving for sugar.

topiramate: approved small molecule (365 associated side effects) Used for the treatment and control of partial seizures and severe tonic-clonic (grand mal) seizures and also for the prevention of migraine headaches. In children it is also used for treatment of Lennox-Gastaut syndrome.

365 known side effects mediated through drugs targeting this protein:

Abdominal distension Abdominal pain Acidosis Acne Affect  
labiality Ageusia Aggression Agitation Agranulocytosis  
Alanine aminotransferase increased Albuminuria Alcohol  
intolerance Alopecia Amblyopia Amenorrhoea Amnesia Anaemia  
Angina pectoris Angiopathy Angle closure glaucoma Anxiety  
Apathy Apraxia Arrhythmia Arthralgia Arthropathy  
Aspartate aminotransferase increased Asthenia Asthma  
Ataxia Atrioventricular block Autonomic neuropathy Back  
pain Basal cell carcinoma Bipolar I disorder Bipolar disorder  
Bladder disorder Bladder pain Blindness Blister Blood  
alkaline phosphatase increased Blood creatinine increased Body  
temperature decreased Body temperature increased Bone pain  
Bradycardia Breast discharge Breast disorder female Breast pain  
Breath odour Bronchitis Bronchospasm Bundle branch  
block Candidiasis Cardiac fibrillation Cardiovascular disorder  
Cataract Cerebellar syndrome Chest pain Chills  
Chloasma Coagulopathy Cognitive disorder Collagen  
disorder Colour blindness Coma Completed suicide Confusional state  
Congenital eye disorder Conjunctivitis Connective tissue  
disorder Constipation Convulsion Coordination abnormal Cough  
Cystitis Cystitis noninfective Deafness Death Decreased  
appetite Deep vein thrombosis Dehydration Delirium Delusion  
Dental caries Depersonalisation Depressed level of  
consciousness Depression Dermatitis bullous Diabetes mellitus  
Diabetic neuropathy Diarrhoea Diplopia Discomfort  
Disturbance in attention Disturbance in sexual arousal  
Dizziness Drug interaction Drug withdrawal syndrome Dry  
mouth Dry skin Dysgeusia Dyskinesia Dysmenorrhoea Dyspepsia  
Dysphagia Dysphonia Dyspnoea Dystonia Dysuria Ear  
infection Ear pain Eczema Ejaculation disorder  
Electroencephalogram abnormal Embolism Emotional  
disorder Encephalopathy Endocrine disorder Eosinophilia  
Epidermodysplasia verruciformis Epistaxis Erectile  
dysfunction Eructation Erythema multiforme Euphoric mood  
Expressive language disorder Eye disorder Eye pain  
Eyelid ptosis Face oedema Faecal incontinence Fatigue  
Feeling abnormal Flat affect Flatulence Flushing  
Folliculitis Gait disturbance Gallbladder disorder  
Gastritis Gastroenteritis Gastrointestinal disorder  
Gastrointestinal pain Gastroesophageal reflux disease  
Genital candidiasis Genital discharge Gingival bleeding  
Gingival hyperplasia Gingivitis Glaucoma Glossitis  
Goitre Grand mal convulsion Haematoma Haematuria  
Haemoglobin Haemorrhage Haemorrhoids Hair texture abnormal  
Hallucination Hearing impaired Hepatic enzyme increased

Hepatic failure Hepatitis Hiccups Hormone level abnormal  
 Hot flush Hyperacusis Hyperaesthesia Hyperammonaemia  
 Hyperchloraemia Hyperglycaemia Hyperhidrosis  
 Hyperkinesia Hyperlipidaemia Hypernatraemia Hyperplasia  
 Hyperreflexia Hypersensitivity Hypertension  
 Hyperthermia Hypertonia Hypertrichosis Hypoaesthesia  
 Hypocalcaemia Hypocholesterolaemia Hypoglycaemia  
 Hypohidrosis Hypokalaemia Hypokinesia Hyponatraemia  
 Hypophosphataemia Hyporeflexia Hypotension Hypothermia Ill-  
 defined disorder Incontinence Increased appetite Infection  
 Influenza Insomnia Iritis Lacrimal disorder Lacrimation  
 increased Laryngospasm Leukopenia Libido decreased Libido  
 increased Loss of consciousness Lymphadenopathy Lymphocytosis  
 Lymphopenia Maculopathy Malaise Mania Mastitis Melaena  
 Memory impairment Menopausal symptoms Menorrhagia Menstrual  
 disorder Mental disability Mental disorder Metabolic acidosis  
 Metrorrhagia Migraine Mood swings Mouth ulceration  
 Muscle contractions involuntary Muscle spasms Muscular  
 weakness Musculoskeletal discomfort Musculoskeletal disorder  
 Musculoskeletal pain Myalgia Mydriasis Myopia Nail  
 disorder Nausea Neoplasm Neoplasm malignant  
 Nephrolithiasis Nervous system disorder Nervousness  
 Neuropathy peripheral Neurosis Neutropenia Nocturia  
 Nystagmus Obesity Oedema peripheral Oesophagitis  
 Oliguria Orthostatic hypotension Osteoarthritis  
 Osteoarthropathy Osteoporosis Otitis media Pain Pain  
 in extremity Pallor Palpitations Pancreatitis  
 Pancytopenia Paraesthesia Paralysis Paranoia  
 Parosmia Pemphigus Personality disorder Pharyngitis  
 Phlebitis Photophobia Photosensitivity reaction Pneumonia  
 Pollakiuria Polycythaemia Polyuria Premature ejaculation  
 Prostatic disorder Prothrombin level increased Pruritus  
 Psychotic disorder Pulmonary embolism Purpura Rash  
 Rash erythematous Rash maculo-papular Renal pain Renal  
 tubular acidosis Renal tubular disorder Respiratory disorder  
 Respiratory tract infection Rhinitis Road traffic accident  
 Salivary hypersecretion Scotoma Seborrhoeic dermatitis  
 Sedation Sensory disturbance Shock Sinusitis Skin  
 discolouration Skin disorder Skin odour abnormal Sleep  
 disorder Somnolence Speech disorder Stomatitis Strabismus  
 Stupor Sudden death Suicidal behaviour Suicidal  
 ideation Suicide attempt Syncope Tachycardia Temperature  
 intolerance Tension Testicular disorder Thinking abnormal  
 Thirst Thrombocytopenia Thrombocytosis Thrombosis  
 Thyroid disorder Tinnitus Tongue disorder Tongue oedema  
 Tongue paralysis Tooth disorder Toothache Toxic epidermal  
 necrolysis Tremor Ulcer Unintended pregnancy Upper motor  
 neurone lesion Upper respiratory tract infection Urethral disorder  
 Urinary incontinence Urinary retention Urinary tract disorder  
 Urinary tract infection Urine abnormality Urine analysis  
 abnormal Urine output increased Urticaria Uterovaginal prolapse  
 Vaginal haemorrhage Vaginal infection Vaginal inflammation  
 Vascular purpura Vasodilation procedure Vasospasm Venous  
 thrombosis Vertigo Viral infection Vision blurred Visual

acuity reduced Visual impairment Vomiting Weight decreased  
Weight increased Xerophthalmia

\*\*\*\*\*  
\*\*\*\*\*

Potassium voltage-gated channel subfamily H member 2 - Group:  
Channel

Treated with:

dofetilide: approved small molecule (59 associated side effects)

For the maintenance of normal sinus rhythm (delay in time to recurrence of atrial fibrillation/atrial flutter [AF/AFL]) in patients with atrial fibrillation/atrial flutter of greater than one week duration who have been converted to normal sinus rhythm

amsacrine: approved small molecule (110 associated side effects) For treatment of acute myeloid leukaemia.

ibutilide: approved small molecule (53 associated side effects)

Indicated for the rapid conversion of atrial fibrillation or atrial flutter of recent onset to sinus rhythm.

terfenadine: approved, withdrawn small molecule (0 associated side effects) For the treatment of allergic rhinitis, hay fever, and allergic skin disorders.

prazosin: approved small molecule (93 associated side effects)

For treatment of hypertension, symptomatic benign prostatic hyperplasia, and severe congestive heart failure. May also be used alone or in combination with  $\beta$ -blockers in the preoperative management of signs and symptoms of pheochromocytoma.

sotalol: approved small molecule (99 associated side effects)

For the maintenance of normal sinus rhythm [delay in time to recurrence of atrial fibrillation/atrial flutter (AFIB/AFL)] in patients with symptomatic AFIB/AFL who are currently in sinus rhythm. Also for the treatment of documented life-threatening ventricular arrhythmias.

doxazosin: approved small molecule (243 associated side effects) For treatment and management of mild to moderate hypertension and urinary obstruction symptoms caused by BPH.

cisapride: approved, withdrawn small molecule (0 associated side effects) For the symptomatic treatment of adult patients with nocturnal heartburn due to gastroesophageal reflux disease.

astemizole: approved, withdrawn small molecule (0 associated side effects) Astemizole was indicated for use in the relieving allergy symptoms, particularly rhinitis and conjunctivitis. It has been withdrawn from the market however due to concerns of arrhythmias.

verapamil: approved small molecule (113 associated side effects) For the treatment of hypertension, angina, and cluster headache prophylaxis.

thioridazine: approved small molecule (92 associated side effects) For the treatment of schizophrenia and generalized anxiety disorder.

quinidine: approved small molecule (146 associated side effects) For the treatment of ventricular pre-excitation and cardiac dysrhythmias

pimozide: approved small molecule (68 associated side effects)

Used for the suppression of motor and phonic tics in patients with Tourette's Disorder who have failed to respond satisfactorily to standard treatment.

miconazole: approved small molecule (33 associated side effects)  
 For topical application in the treatment of tinea pedis (athlete's foot), tinea cruris, and tinea corporis caused by *Trichophyton rubrum*, *Trichophyton mentagrophytes*, and *Epidermophyton floccosum*, in the treatment of cutaneous candidiasis (moniliasis), and in the treatment of tinea versicolor.

amiodarone: approved small molecule (192 associated side effects) Intravenously, for initiation of treatment and prophylaxis of frequently recurring ventricular fibrillation and hemodynamically unstable ventricular tachycardia in patients refractory to other therapy. Orally, for the treatment of life-threatening recurrent ventricular arrhythmias such as recurrent ventricular fibrillation and recurrent hemodynamically unstable ventricular tachycardia.

carvedilol: approved small molecule (198 associated side effects) For the treatment of mild or moderate (NYHA class II or III) heart failure of ischemic or cardiomyopathic origin.

terazosin: approved small molecule (115 associated side effects) For the treatment of symptomatic BPH and mild to moderate hypertension.

propafenone: approved small molecule (283 associated side effects) Used to prolong the time to recurrence of paroxysmal atrial fibrillation/flutter (PAF) associated with disabling symptoms in patients without structural heart disease. Also used for the treatment of life-threatening documented ventricular arrhythmias, such as sustained ventricular tachycardia.

halofantrine: approved small molecule (62 associated side effects) For treatment of Severe malaria

sertindole: approved, withdrawn small molecule (0 associated side effects) Used in the treatment of schizophrenia.

685 known side effects mediated through drugs targeting this protein:

Abdominal discomfort Abdominal distension Abdominal pain  
 Abnormal dreams Abscess Acute coronary syndrome Acute  
 interstitial pneumonitis Acute myocardial infarction Acute  
 respiratory distress syndrome Affect lability Aggression  
 Agitation Agranulocytosis Akathisia Akinesia Alanine  
 aminotransferase increased Albuminuria Alkalosis Alopecia  
 Altered state of consciousness Alveolitis fibrosing  
 Amblyopia Amenorrhoea Amnesia Anaemia Anaphylactic  
 shock Anaphylactoid reaction Aneurysm Angina pectoris Angina  
 unstable Angioedema Angiopathy Anorectal discomfort Anoxia  
 Antinuclear antibody positive Anxiety Aortic dissection  
 Apathy Aphasia Aplasia Aplastic anaemia Apnoea  
 Appetite disorder Arrhythmia supraventricular Arterial disorder  
 Arterial stenosis Arterial thrombosis Arthralgia Arthritis  
 Arthropathy Aspartate aminotransferase increased Asthenia  
 Asthma Ataxia Atelectasis Atrial fibrillation  
 Atrial hypertrophy Atrial tachycardia Atrioventricular  
 block Atrioventricular block complete Atrioventricular block first  
 degree Atrioventricular block second degree Atrioventricular  
 dissociation Autonomic nervous system imbalance Azotaemia Back  
 pain Balance disorder Benign intracranial hypertension Bladder

pain Bleeding time prolonged Blindness Blood alkaline  
 phosphatase increased Blood bilirubin increased Blood creatine  
 phosphokinase increased Blood creatinine increased Blood  
 disorder Blood glucose increased Blood insulin increased  
 Blood pressure increased Blood prolactin increased Blood  
 triglycerides increased Blood urea increased Blood uric acid  
 increased Body temperature decreased Body temperature increased  
 Bone disorder Bradycardia Bradykinesia Breast disorder  
 Breast engorgement Breast feeding Breast neoplasm  
 Breast pain Breath odour Breath sounds abnormal  
 Bronchiolitis Bronchitis Bronchospasm Bundle branch  
 block Bundle branch block left Bundle branch block right  
 Burning sensation Bursitis Cardiac arrest Cardiac disorder  
 Cardiac failure Cardiac failure congestive Cardiac  
 fibrillation Cardiac murmur Cardioactive drug level  
 Cardiogenic shock Cardiomegaly Cardiomyopathy  
 Cardiovascular disorder Carotid bruit Cataract  
 Catatonia Cell death Cellulitis Cerebral ischaemia  
 Cerebrovascular accident Cerebrovascular disorder Chest  
 pain Chills Cholelithiasis Cholestasis Choreoathetosis  
 Chronic obstructive pulmonary disease Coagulopathy  
 Cognitive disorder Cogwheel rigidity Colitis ischaemic  
 Collagen-vascular disease Coma Completed suicide Conduction  
 disorder Confusional state Congenital cardiovascular anomaly  
 Congenital eye disorder Conjunctival disorder  
 Conjunctivitis Connective tissue disorder Constipation  
 Convulsion Coordination abnormal Corneal degeneration  
 Corneal deposits Coronary artery disease Costochondritis  
 Cough Crocodile tears syndrome Cutaneous vasculitis  
 Cystitis Cystitis noninfective Cytolytic hepatitis  
 Deafness Death Decreased appetite Dehydration Delirium  
 Dementia Demyelinating polyneuropathy Depersonalisation  
 Depressed level of consciousness Depression Depressive  
 symptom Dermatitis Dermatitis bullous Dermatitis contact  
 Dermatitis exfoliative Dermatitis psoriasiform Device  
 capturing issue Diabetes mellitus Diarrhoea Diplopia Disability  
 Discomfort Disorientation Disseminated intravascular  
 coagulation Dissociation Disturbance in attention Disturbance  
 in sexual arousal Diverticulitis Dizziness Dizziness postural  
 Drug eruption Drug interaction Drug level increased Dry  
 eye Dry mouth Dry skin Dry throat Duodenitis Dysgeusia  
 Dyskinesia Dyspepsia Dysphagia Dyspnoea Dystonia  
 Dysuria Ear infection Ear pain Ecchymosis Eczema  
 Effusion Ejaculation failure Elderly Electrocardiogram  
 QT prolonged Electrocardiogram abnormal Electrocardiogram  
 change Electrocardiogram normal Embolism Embolism arterial  
 Emotional disorder Encephalopathy Endocrine disorder  
 Eosinophil count increased Eosinophilia Eosinophilic  
 pneumonia Epididymitis Epistaxis Erectile dysfunction  
 Eructation Erythema Erythema multiforme Extrapyrarnidal  
 disorder Extrasystoles Extravasation Eye disorder Eye  
 haemorrhage Eye inflammation Eye irritation Eye pain Eyelid  
 ptosis Face oedema Faecal incontinence Fasting Fatigue  
 Febrile neutropenia Feeling abnormal Feeling cold  
 Feeling hot Fibrosis Flat affect Flatulence Floppy iris

syndrome Fluid imbalance Fluid overload Fluid retention  
 Flushing Foetor hepaticus Fungal infection Gait disturbance  
 Galactorrhoea Gamma-glutamyltransferase increased  
 Gastric ulcer Gastritis Gastroenteritis Gastrointestinal  
 disorder Gastrointestinal haemorrhage Gastrointestinal pain  
 Gastrointestinal tract irritation Gastrooesophageal reflux  
 disease Generalised oedema Genital burning sensation  
 Genital discharge Gingival bleeding Gingival hyperplasia  
 Gingival pain Gingivitis Glossitis Glossodynia Glycosuria  
 Goitre Gout Grand mal convulsion Granulomatous liver  
 disease Gravitational oedema Gynaecomastia Haematemesis  
 Haematocrit decreased Haematoma Haematuria Haemoglobin  
 Haemoglobin decreased Haemoglobinuria Haemolysis Haemolytic  
 anaemia Haemolytic uraemic syndrome Haemoptysis Haemorrhage  
 Hallucination Headache Hearing impaired Heart rate  
 irregular Heart sounds abnormal Hepatic cirrhosis Hepatic enzyme  
 increased Hepatic failure Hepatic function abnormal Hepatitis  
 Hepatitis cholestatic Hepatitis fulminant Hepatobiliary  
 disease Hepatocellular injury Hepatomegaly Hernia  
 Herpes simplex Herpes virus infection Herpes zoster High  
 density lipoprotein decreased Hormone level abnormal Hot flush  
 Hyperaemia Hyperbilirubinaemia Hypercholesterolaemia  
 Hyperglycaemia Hyperhidrosis Hyperinsulinism  
 Hyperkalaemia Hyperkeratosis Hyperkinesia  
 Hyperlactacidaemia Hyperlipidaemia Hyperplasia  
 Hyperprolactinaemia Hyperpyrexia Hyperreflexia  
 Hypersensitivity Hypertension Hypertensive crisis  
 Hyperthyroidism Hypertonia Hypertriglyceridaemia  
 Hypertrophic cardiomyopathy Hypertrophy Hyperuricaemia  
 Hypoaesthesia Hypocalcaemia Hypoglycaemia  
 Hypokalaemia Hypokinesia Hypomagnesaemia Hyponatraemia  
 Hypophosphataemia Hypoprothrombinaemia Hypotension Hypothermia  
 Hypothyroidism Hypotonia Hypovolaemia Hypoxia  
 Idiopathic pulmonary fibrosis Idiopathic thrombocytopenic  
 purpura Ileus paralytic Ill-defined disorder Immune system  
 disorder Inappropriate antidiuretic hormone secretion  
 Incontinence Increased appetite Increased tendency to  
 bruise Infarction Infection Infestation Inflammation  
 Influenza Influenza like illness Injection site inflammation  
 Injection site reaction Insomnia Intermittent  
 claudication Interstitial lung disease Intestinal obstruction  
 Ischaemia Ischaemic cardiomyopathy Jaundice Joint  
 swelling Ketonuria Lacrimation increased Laryngeal oedema  
 Laryngospasm Lens disorder Lenticular opacities  
 Lethargy Leukocytosis Leukopenia Libido decreased  
 Lichen planus Liver disorder Liver function test abnormal  
 Liver injury Loss of consciousness Lung disorder Lung  
 infiltration Lung neoplasm malignant Lymphadenopathy  
 Lymphoma Macular degeneration Macule Malaise Mania  
 Mass Mediastinal disorder Melaena Menopausal symptoms  
 Menopause Menstruation irregular Mental disability Mental  
 disorder Mesenteric artery thrombosis Micturition disorder  
 Migraine Miosis Monocyte count increased Mood swings  
 Mouth ulceration Movement disorder Mucosal inflammation  
 Mucous membrane disorder Muscle fatigue Muscle relaxant

therapy      Muscle rigidity      Muscle spasms      Muscle twitching  
Muscular weakness      Musculoskeletal discomfort      Musculoskeletal  
pain      Myalgia      Mydriasis      Myocardial infarction      Myocardial  
ischaemia      Myopathy      Myopia      Nail disorder      Narcolepsy      Nasal  
congestion      Nasopharyngitis      Nausea      Neck pain      Necrosis  
Neoplasm malignant      Nephritis      Nephrolithiasis      Nephrotic  
syndrome      Nervous system disorder      Nervousness      Neuralgia  
Neuritis      Neuroleptic malignant syndrome      Neuropathy  
peripheral      Neurosis      Neutropenia      Night blindness      Nightmare  
Nocturia      Nodal arrhythmia      Nodule      Nuchal rigidity  
Nystagmus      Obliterative bronchiolitis      Obstruction      Oculogyric  
crisis      Oculomucocutaneous syndrome      Oedema      Oedema peripheral  
Oesophagitis      Oligomenorrhoea      Oliguria      Onycholysis  
Opisthotonus      Optic nerve disorder      Optic neuritis  
Organising pneumonia      Oropharyngeal discomfort  
Oropharyngeal pain      Orthostatic hypotension  
Osteoarthritis      Otitis media      Pain      Pain in extremity      Pain  
in jaw      Pain of skin      Pallor      Palpitations      Pancreatic  
disorder      Pancreatitis      Pancytopenia      Papilloedema  
Paraesthesia      Paralysis flaccid      Paresis      Parkinsonism  
Parosmia      Parotid gland enlargement      Pelvic pain      Peptic  
ulcer      Pericarditis      Perineal pain      Periodontitis      Peripheral  
coldness      Peripheral embolism      Peripheral ischaemia      Peripheral  
vascular disorder      Perirectal abscess      Petechiae      Pharyngitis  
Phlebitis      Photodermatosis      Photophobia      Photosensitivity  
reaction      Pigmentation disorder      Plasmodium falciparum infection  
Platelet count decreased      Platelet disorder      Pleural disorder  
Pleural effusion      Pleurisy      Pneumonia      Pollakiuria      Polymyalgia  
rheumatica      Polyneuropathy      Polyserositis      Polyuria      Pregnancy  
test false positive      Pregnancy test positive      Presyncope  
Priapism      Proctalgia      Prostatic disorder      Prostatism  
Protein urine present      Proteinuria      Prothrombin level decreased  
Prothrombin level increased      Protrusion tongue      Pruritus  
Pruritus genital      Psoriasis      Psychotic disorder      Pulmonary  
congestion      Pulmonary fibrosis      Pulmonary oedema      Pulmonary  
toxicity      Pulse abnormal      Pulse absent      Pulseless electrical  
activity      Purpura      Pustular psoriasis      Pyuria  
Quadripareisis      Rales      Rash      Rash erythematous      Rash maculo-  
papular      Rash papular      Raynaud's phenomenon      Rectal  
haemorrhage      Rectal tenesmus      Red blood cell count decreased      Renal  
artery stenosis      Renal failure      Renal failure acute      Renal  
impairment      Renal pain      Respiratory alkalosis      Respiratory disorder  
Respiratory distress      Respiratory failure      Respiratory tract  
congestion      Respiratory tract infection      Retinal disorder      Retrograde  
ejaculation      Rhabdomyolysis      Rhinitis      Rhythm idioventricular  
Salivary hypersecretion      Sciatica      Scleral disorder  
Scotoma      Seborrhoeic dermatitis      Semen analysis abnormal  
Sensory loss      Sepsis      Sexual dysfunction      Shock      Sicca  
syndrome      Sick sinus syndrome      Sinoatrial block      Sinus arrest  
Sinus arrhythmia      Sinus bradycardia      Sinus congestion      Sinus  
tachycardia      Sinusitis      Skin cancer      Skin discolouration      Skin  
disorder      Skin exfoliation      Skin hypertrophy      Skin necrosis      Sleep  
disorder      Social avoidant behaviour      Somnolence      Speech disorder  
Spleen disorder      Stomatitis      Subarachnoid haemorrhage  
Sudden death      Sudden visual loss      Supraventricular

extrasystoles      Supraventricular tachycardia Swelling      Syncope  
                          Systemic lupus erythematosus Tachyarrhythmia      Tachycardia  
                          Tardive dyskinesia      Tenderness Tendon disorder      Tendonitis  
                          Tension      Tetany      Thinking abnormal Thirst      Thought  
 blocking      Throat tightness Thrombocytopenia Thrombocytopenic  
 purpura      Thrombophlebitis Thrombosis Thrombotic thrombocytopenic  
 purpura      Thyroid cancer      Thyroid disorder Thyroid neoplasm  
                          Tinnitus      Tongue disorder      Tooth disorder      Tooth hypoplasia  
                          Torsade de pointes      Torticollis Toxic epidermal necrolysis  
                          Tracheobronchitis Tremor      Trismus      Tubulointerstitial  
 nephritis      Ulcer Upper respiratory tract infection Ureteric  
 obstruction Urethral disorder Urinary incontinence      Urinary retention  
                          Urinary tract disorder Urinary tract infection      Urine  
 abnormality Urine analysis abnormal      Urine output      Urine  
 output increased Urogenital disorder      Urticaria      Uterovaginal  
 prolapse      Uveitis      VIIIth nerve paralysis Vaginal discharge  
                          Vascular purpura Vascular resistance systemic Vasculitis  
                          Vasodilation procedure Venous thrombosis Ventricular arrhythmia  
                          Ventricular extrasystoles      Ventricular fibrillation  
                          Ventricular hypertrophy      Ventricular tachycardia  
                          Vertigo      Viral infection      Vision blurred      Visual acuity  
 reduced      Visual impairment Vomiting      Vulvovaginal discomfort  
                          Vulvovaginal erythema Weight decreased Weight increased  
                          Wheezing      White blood cell count increased

\*\*\*\*\*  
 \*\*\*\*\*

fMet-Leu-Phe receptor - Group: Receptor

Treated with:

nedocromil: approved      small molecule      (44 associated side effects)  
                          For the treatment of mild to moderate asthma

44 known side effects mediated through drugs targeting this protein:

Abdominal pain      Anaphylactic shock      Arthritis      Asthenia      Body  
 temperature increased      Bronchitis      Chest pain      Cough      Dermatitis  
                          Diarrhoea      Dizziness      Dyspepsia      Dyspnoea      Eosinophilia  
                          Erythema      Fatigue      Feeling abnormal      Feeling hot  
                          Gastrointestinal pain      Headache      Increased bronchial  
 secretion      Infection      Leukopenia      Loeffler's syndrome      Malaise  
                          Nasal congestion      Nausea      Neutropenia      Ocular hyperaemia      Pain  
                          Pharyngitis      Photophobia      Pneumonia      Pulmonary eosinophilia      Rash  
                          Respiratory disorder      Respiratory tract infection      Rhinitis  
                          Sinusitis      Sputum increased      Tremor      Upper respiratory  
 tract infection      Viral infection      Vomiting

\*\*\*\*\*  
 \*\*\*\*\*

Glycine receptor subunit beta - Group: Channel

Treated with:

glycine: approved, nutraceutical small molecule      (38 associated  
 side effects)      Supplemental glycine may have antispastic activity.  
 Very early findings suggest it may also have antipsychotic activity  
 as well as antioxidant and anti-inflammatory activities.

lindane: approved      small molecule      (9 associated side effects)

For the treatment of patients infested with *Sarcoptes scabiei*  
 or pediculosis capitis who have either failed to respond to adequate  
 doses, or are intolerant of other approved therapies.



43 known side effects mediated through drugs targeting this protein:

Acidosis Agitation Alopecia Angina pectoris Back pain  
Blindness Blindness transient Chills Coma Convulsion  
Dehydration Dermatitis contact Diarrhoea Dizziness Dry  
mouth Electrolyte imbalance Encephalopathy Fluid overload  
Headache Hyperammonaemia Hyperkinesia Hypersensitivity  
Hyponatraemia Hypotension Lung disorder Nausea  
Oedema Pain Paraesthesia Polyuria Pruritus  
Pulmonary congestion Respiratory tract congestion Rhinitis  
Salivary hypersecretion Tachycardia Thirst  
Thrombophlebitis Urinary retention Urticaria Vertigo  
Visual impairment Vomiting

\*\*\*\*\*  
\*\*\*\*\*

Potassium/sodium hyperpolarization-activated cyclic nucleotide-gated  
channel 2 - Group: Channel

Treated with:

cyclic guanosine monophosphate: experimental small molecule  
(0 associated side effects)  
cyclic adenosine monophosphate: experimental small molecule  
(0 associated side effects)

known side effects mediated through drugs targeting this protein:

\*\*\*\*\*  
\*\*\*\*\*

Transient receptor potential cation channel subfamily M member 7 -  
Group: Enzyme

Treated with:

adenosine-5'-diphosphate: experimental small molecule (0  
associated side effects)  
phosphoaminophosphonic acid-adenylate ester: experimental small  
molecule (0 associated side effects)  
1,4-dithiothreitol: experimental small molecule (0  
associated side effects)

known side effects mediated through drugs targeting this protein:

\*\*\*\*\*  
\*\*\*\*\*

Organic cation/carnitine transporter 1 - Group: Transporter

Treated with:

choline: approved, nutraceutical small molecule (0 associated  
side effects) For nutritional supplementation, also for treating  
dietary shortage or imbalance  
l-lysine: approved, nutraceutical small molecule (0 associated  
side effects) Supplemental L-lysine has putative anti-herpes  
simplex virus activity. There is preliminary research suggesting  
that it may have some anti-osteoporotic activity.  
l-arginine: approved, nutraceutical small molecule (20 associated  
side effects) Used for nutritional supplementation, also for  
treating dietary shortage or imbalance.

spermine: approved, nutraceutical small molecule (0 associated side effects) For nutritional supplementation, also for treating dietary shortage or imbalance

nicotine: approved small molecule (98 associated side effects) For the relief of nicotine withdrawal symptoms and as an aid to smoking cessation.

ipratropium bromide: approved small molecule (116 associated side effects) For maintenance treatment of bronchospasm associated with chronic obstructive pulmonary disease, including chronic bronchitis and emphysema.

aminohippurate: approved small molecule (0 associated side effects) Used to measure effective renal plasma flow (ERPF) and to determine the functional capacity of the tubular excretory mechanism.

imipramine: approved small molecule (100 associated side effects) For the relief of symptoms of depression and as temporary adjunctive therapy in reducing enuresis in children aged 6 years and older. May also be used to manage panic disorders, with or without agoraphobia, as a second line agent in ADHD, management of eating disorders, for short-term management of acute depressive episodes in bipolar disorder and schizophrenia, and for symptomatic treatment of postherpetic neuralgia.

quinine: approved small molecule (0 associated side effects) For the treatment of malaria and leg cramps

cimetidine: approved small molecule (50 associated side effects) For the treatment and the management of acid-reflux disorders (GERD), peptic ulcer disease, heartburn, and acid indigestion.

guanidine: approved small molecule (0 associated side effects) For the reduction of the symptoms of muscle weakness and easy fatigability associated with the myasthenic syndrome of Eaton-Lambert. It is not indicated for treating myasthenia gravis.

clonidine: approved small molecule (161 associated side effects) May be used as an adjunct in the treatment of hypertension, as an epidural infusion as an adjunct treatment in the management of severe cancer pain that is not relieved by opiate analgesics alone, for differential diagnosis of pheochromocytoma in hypertensive patients, prophylaxis of vascular migraine headaches, treatment of severe dysmenorrhea, management of vasomotor symptoms associated with menopause, rapid detoxification in the management of opiate withdrawal, treatment of alcohol withdrawal used in conjunction with benzodiazepines, management of nicotine dependence, topical use to reduce intraocular pressure in the treatment of open-angle and secondary glaucoma and hemorrhagic glaucoma associated with hypertension, and in the treatment of attention-deficit hyperactivity disorder (ADHD).

l-carnitine: approved small molecule (0 associated side effects) For treatment of primary systemic carnitine deficiency, a genetic impairment of normal biosynthesis or utilization of levocarnitine from dietary sources, or for the treatment of secondary carnitine deficiency resulting from an inborn error of metabolism such as glutaric aciduria II, methyl malonic aciduria, propionic acidemia, and medium chain fatty acylCoA dehydrogenase deficiency. Used therapeutically to stimulate gastric and pancreatic secretions and in the treatment of hyperlipoproteinemias. Parenteral

levocarnitine is indicated for the prevention and treatment of carnitine deficiency in patients with end-stage renal disease.  
amiloride: approved small molecule (85 associated side effects)

For use as adjunctive treatment with thiazide diuretics or other kaliuretic-diuretic agents in congestive heart failure or hypertension.

testosterone: approved small molecule (274 associated side effects) To be used as hormone replacement or substitution of diminished or absent endogenous testosterone. Use in males: For management of congenital or acquired hypogonadism, hypogonadism associated with HIV infection, and male climacteric (andropause). Use in females: For palliative treatment of androgen-responsive, advanced, inoperable, metastatic (skeletal) carcinoma of the breast in women who are 1-5 years postmenopausal; testosterone esters may be used in combination with estrogens in the management of moderate to severe vasomotor symptoms associated with menopause in women who do not respond to adequately to estrogen therapy alone.

verapamil: approved small molecule (113 associated side effects) For the treatment of hypertension, angina, and cluster headache prophylaxis.

quinidine: approved small molecule (146 associated side effects) For the treatment of ventricular pre-excitation and cardiac dysrhythmias

procainamide: approved small molecule (55 associated side effects) For the treatment of life-threatening ventricular arrhythmias.

penicillin G: approved small molecule (0 associated side effects) For use in the treatment of severe infections caused by penicillin G-susceptible microorganisms when rapid and high penicillin levels are required such as in the treatment of septicemia, meningitis, pericarditis, endocarditis and severe pneumonia.

levofloxacin: approved small molecule (0 associated side effects) For the treatment of bacterial conjunctivitis caused by susceptible strains of the following organisms:

<i>Corynebacterium</i> species, <i>Staphylococcus aureus</i>, <i>Staphylococcus epidermidis</i>, <i>Streptococcus pneumoniae</i>, <i>Streptococcus</i> (Groups C/F/G), Viridans group streptococci, <i>Acinetobacter lwoffii</i>, <i>Haemophilus influenzae</i>, <i>Serratia marcescens</i>.

desipramine: approved small molecule (120 associated side effects) For relief of symptoms in various depressive syndromes, especially endogenous depression. It has also been used to manage chronic peripheral neuropathic pain, as a second line agent for the management of anxiety disorders (e.g. panic disorder, generalized anxiety disorder), and as a second or third line agent in the ADHD management.

tiotropium: approved small molecule (60 associated side effects) Used in the management of chronic obstructive pulmonary disease (COPD).

putrescine: experimental small molecule (0 associated side effects)

spermidine: experimental small molecule (0 associated side effects)

732 known side effects mediated through drugs targeting this protein:

Abdominal discomfort Abdominal distension Abdominal pain  
Abdominal pain upper Abdominal symptom Abnormal dreams  
Abscess Accommodation disorder Acidosis Acne Activated  
partial thromboplastin time prolonged Acute coronary syndrome  
Acute respiratory distress syndrome Adenoma benign  
Affect lability Affective disorder Ageusia Aggression  
Agitation Agranulocytosis Alanine aminotransferase increased  
Albuminuria Alopecia Alveolitis allergic Amenorrhoea  
Amnesia Anaemia Anaphylactic shock Anaphylactoid  
reaction Androgenetic alopecia Anger Angina pectoris Angioedema  
Angiopathy Angle closure glaucoma Anosmia Antinuclear  
antibody positive Anuria Anxiety Aortic dissection Apathy  
Aphasia Aplastic anaemia Apnoea Appetite disorder  
Application site oedema Application site reaction  
Arrhythmia Arterial disorder Arthralgia Arthritis Ascites  
Aspartate aminotransferase increased Aspiration Asthenia  
Asthma Ataxia Atelectasis Atrial fibrillation  
Atrioventricular block Atrioventricular block complete  
Atrioventricular block second degree Atrioventricular  
dissociation Atrophy Autonomic neuropathy Azoospermia  
Azotaemia Back pain Balance disorder Benign intracranial  
hypertension Benign prostatic hyperplasia Bladder dilatation  
Bladder irritation Bladder neck obstruction Bladder  
pain Bladder spasm Blindness Blister Blood alkaline  
phosphatase increased Blood bilirubin increased Blood cholesterol  
increased Blood creatinine increased Blood electrolytes abnormal  
Blood glucose abnormal Blood glucose decreased Blood  
glucose increased Blood lactate dehydrogenase increased Blood  
potassium increased Blood pressure diastolic decreased Blood  
pressure increased Blood pressure systolic increased Blood  
prolactin increased Blood testosterone decreased Blood  
triglycerides increased Blood urea increased Body temperature  
increased Bone pain Bradycardia Bradyphrenia Breast disorder  
Breast enlargement Breast pain Breast tenderness Breath  
odour Bronchitis Bronchospasm Bronchospasm paradoxical  
Candidiasis Candiduria Cardiac arrest Cardiac disorder  
Cardiac failure Cardiac failure congestive Cardiac  
fibrillation Cardiomyopathy Cardiovascular disorder  
Cataract Cerebral artery thrombosis Cerebral haemorrhage  
Cerebral ischaemia Cerebral thrombosis Cerebrovascular  
accident Cerebrovascular disorder Chemical eye injury Chest  
discomfort Chest pain Chills Cholecystitis Cholelithiasis  
Cholestasis Cholinergic syndrome Choreoathetosis Chronic  
obstructive pulmonary disease Coagulopathy Cognitive  
disorder Colitis Colonic pseudo-obstruction Coma Coma  
hepatic Completed suicide Condition aggravated Confusional state  
Congenital cystic kidney disease Conjunctival hyperaemia  
Conjunctival oedema Conjunctivitis Connective tissue  
disorder Constipation Convulsion Coombs test positive  
Coordination abnormal Corneal erosion Corneal oedema

Coronary artery disease      Coronary artery thrombosis      Cough  
 Crying      Crystal urine      Crystalluria      Cutaneous  
 vasculitis      Cyanosis      Cyst      Deafness      Death      Decreased appetite  
 Deep vein thrombosis      Dehydration      Delirium      Delusion  
 Dental caries      Dependence      Depressed level of consciousness  
 Depressed mood      Depression      Depression suicidal      Depressive  
 symptom      Dermatitis      Dermatitis acneiform      Dermatitis atopic  
 Dermatitis bullous      Dermatitis contact      Dermatitis  
 exfoliative      Device related infection      Diabetes mellitus      Diarrhoea  
 Diplopia      Discomfort      Disorientation      Disseminated  
 intravascular coagulation      Dissociation      Disturbance in  
 attention      Disturbance in sexual arousal      Dizziness      Drug abuse  
 Drug dependence      Drug eruption      Drug interaction      Drug  
 tolerance      Dry eye      Dry mouth      Dry skin      Dry throat  
 Dysaesthesia      Dysgeusia      Dysmenorrhoea      Dyspepsia  
 Dysphagia      Dysphonia      Dyspnoea      Dystonia      Dysuria      Ear  
 disorder      Ear haemorrhage      Ear infection      Ear pain      Ecchymosis  
 Eczema      Effusion      Ejaculation failure      Elderly  
 Electrocardiogram QT prolonged      Electrocardiogram abnormal  
 Electrocardiogram normal      Electroencephalogram abnormal  
 Electrolyte imbalance      Emotional disorder      Emotional  
 distress      Emphysema      Encephalopathy      Endocarditis      Endocrine  
 disorder      Endometrial sarcoma      Enlarged clitoris      Enuresis  
 Eosinophilia      Epidermal necrosis      Epididymitis  
 Epistaxis      Erectile dysfunction      Erythema      Erythema  
 multiforme      Erythema nodosum      Euphoric mood      Extradural abscess  
 Extrapyrarnidal disorder      Extravasation      Eye disorder  
 Eye infection      Eye irritation      Eye pain      Eye pruritus  
 Face oedema      Fasting      Fatigue      Feeling abnormal      Feeling  
 cold      Fibrosis      Flat affect      Flatulence      Fluid overload      Fluid  
 retention      Flushing      Foetor hepaticus      Folliculitis      Formication  
 Fungal infection      Gait disturbance      Galactorrhoea      Gamma-  
 glutamyltransferase increased      Gangrene      Gastritis  
 Gastroenteritis      Gastrointestinal disorder      Gastrointestinal  
 haemorrhage      Gastrointestinal motility disorder      Gastrointestinal pain  
 Gastrointestinal tract irritation      Gastrooesophageal reflux  
 disease      Genital candidiasis      Genital discharge      Gigantism  
 Gingival blister      Gingival erythema      Gingival hyperplasia  
 Gingival pain      Gingivitis      Glaucoma      Glomerulonephritis  
 Glossitis      Glucose tolerance impaired      Glycosuria      Gout      Grand  
 mal convulsion      Granulomatous liver disease      Growth accelerated  
 Gynaecomastia      Haemarthrosis      Haematocrit increased  
 Haematoma      Haematuria      Haemoglobin      Haemoglobin abnormal  
 Haemoglobin increased      Haemoglobinuria      Haemolytic anaemia  
 Haemolytic uraemic syndrome      Haemoptysis      Haemorrhage  
 Haemorrhoids      Hair colour changes      Hair growth abnormal  
 Hallucination      Hallucination, auditory      Hallucinations,  
 mixed      Halo vision      Headache      Hearing impaired      Hepatic encephalopathy  
 Hepatic enzyme increased      Hepatic failure      Hepatic fibrosis  
 Hepatic function abnormal      Hepatic necrosis      Hepatic neoplasm  
 Hepatic neoplasm malignant      Hepatitis      Hepatobiliary disease  
 Hepatocellular injury      Herpes simplex      Herpes virus infection  
 Herpes zoster      Hiccups      High density lipoprotein decreased  
 Hirsutism      Hormone level abnormal      Hostility      Hot flush  
 Hyperacusis      Hyperaemia      Hyperaesthesia      Hyperbilirubinaemia

Hypercholesterolaemia Hypergammaglobulinaemia  
Hyperglycaemia Hyperhidrosis Hyperkalaemia  
Hyperkeratosis Hyperkinesia Hyperlipidaemia  
Hypernatraemia Hyperplasia Hyperprolactinaemia  
Hypersensitivity Hypertension Hypertonia Hypertonic  
bladder Hypertriglyceridaemia Hypertrophic cardiomyopathy  
Hypertrophy Hypoaesthesia Hypocalcaemia Hypogeusia  
Hypoglycaemia Hypokalaemia Hypomagnesaemia Hypomania  
Hyponatraemia Hypophosphataemia Hypoprothrombinaemia  
Hyposthenuria Hypotension Hypoventilation Hypoxia  
Idiopathic thrombocytopenic purpura Ileus paralytic Ill-  
defined disorder Immune system disorder Impatience Inappropriate  
antidiuretic hormone secretion Incontinence Increased  
appetite Increased bronchial secretion Induration Infarction  
Infection Infestation Inflammation Influenza Influenza  
like illness Injection site inflammation Injection site pain  
Injection site reaction Insomnia Intermittent  
claudication International normalised ratio increased  
Interstitial lung disease Intestinal obstruction Intestinal  
perforation Intracranial pressure increased Intraocular pressure  
increased Irritability Ischaemia Jaundice Jaundice  
cholestatic Joint swelling Keratitis Laboratory test abnormal  
Lacrimation decreased Lacrimation increased Laryngeal oedema  
Laryngitis Laryngospasm Lens disorder Lenticular  
opacities Lethargy Leukocytoclastic vasculitis Leukocytosis  
Leukopenia Leukoplakia Libido decreased Libido increased  
Lipids abnormal Lipids increased Liver disorder Liver  
function test abnormal Loss of consciousness Loss of libido Lower  
respiratory tract infection Lymphadenitis Lymphadenopathy  
Lymphocytosis Lymphopenia Macule Malaise Mania Mass  
Mediastinal disorder Melaena Meningitis Menopausal  
symptoms Menorrhagia Menstrual disorder Menstruation irregular  
Mental disability Mental disorder Mental retardation  
Metrorrhagia Micturition urgency Migraine Mood swings  
Mouth ulceration Mucosal inflammation Mucosal ulceration  
Multi-organ failure Multiple hereditary exostosis  
Muscle contractions involuntary Muscle fatigue Muscle  
spasms Muscular weakness Musculoskeletal discomfort  
Musculoskeletal disorder Myalgia Myasthenia gravis  
Mydriasis Myocardial infarction Myoclonus Myositis Nasal  
congestion Nasal discomfort Nasal dryness Nasal oedema Nasal  
polyps Nasal ulcer Nasopharyngitis Nausea Neck pain  
Necrosis Neoplasm malignant Neoplasm prostate Nephritis  
Nephrolithiasis Nephropathy Nephrotic syndrome Nervous  
system disorder Nervousness Neuritis Neuroleptic malignant  
syndrome Neuropathy peripheral Neutropenia Neutrophilia Night  
blindness Nightmare Nipple disorder Nipple pain Nocturia Nodal  
arrhythmia Nodule Nystagmus Obstruction Obstructive airways  
disorder Oedema Oedema mouth Oedema peripheral  
Oesophagitis Oligomenorrhoea Oliguria Optic neuritis  
Oral disorder Oral pruritus Organ failure  
Oropharyngeal discomfort Oropharyngeal pain Orthostatic  
hypotension Osteoarthropathy Osteomyelitis Otitis media acute  
Pain Pain in extremity Pain in jaw Pallor Palpitations  
Pancreatitis Pancytopenia Papule Paraesthesia

Paralysis flaccid Paranoia Parosmia Parotid gland  
 enlargement Parotitis Pathological fracture Peliosis hepatis  
 Pelvic pain Penile pain Penis disorder Peptic ulcer  
 Pericarditis Peripheral vascular disorder Personality  
 disorder Petechiae Pharyngeal oedema Pharyngitis Phlebitis  
 Phobia Photophobia Photosensitivity reaction  
 Pigmentation disorder Pituitary tumour Plasmodium falciparum  
 infection Platelet count decreased Platelet disorder Pleural  
 disorder Pleural effusion Pleurisy Pneumonia Pneumothorax  
 Poisoning Pollakiuria Polycythaemia Polymyositis Polyp  
 Polyuria Precocious puberty Pressure of speech  
 Presyncope Priapism Prostate cancer Prostatic adenoma  
 Prostatic disorder Prostatic specific antigen increased  
 Prostatitis Prostatomegaly Protein urine present Proteinuria  
 Prothrombin level decreased Prothrombin level increased  
 Pruritus Pruritus genital Pseudomembranous colitis  
 Psychotic disorder Pulmonary embolism Pulmonary  
 function test decreased Pulmonary oedema Purpura Pyuria  
 Quadripareisis Rash Rash erythematous Rash follicular Rash  
 generalised Rash macular Rash maculo-papular Rash papular  
 Rash pustular Raynaud's phenomenon Red blood cell count  
 increased Renal failure Renal failure acute Renal impairment  
 Renal tubular disorder Respiratory arrest Respiratory  
 depression Respiratory disorder Respiratory failure Respiratory  
 tract infection Rhabdomyolysis Rhinitis Rhinorrhoea Salivary  
 gland pain Salivary hypersecretion Sarcosinaemia Scar  
 Scotoma Seborrhoeic dermatitis Sedation Sensation of  
 foreign body Sensitisation Sensory loss Sepsis Serum  
 sickness Sexual dysfunction Shock Sicca syndrome Sick sinus  
 syndrome Sinus arrest Sinus bradycardia Sinusitis Skin  
 disorder Skin exfoliation Skin hyperpigmentation Skin irritation  
 Skin mass Skin necrosis Skin ulcer Sleep apnoea syndrome  
 Sleep disorder Sleep terror Sneezing Social avoidant  
 behaviour Soft tissue disorder Somnolence Speech disorder  
 Sputum increased Status asthmaticus Stickler's syndrome  
 Stomatitis Stridor Strongyloidiasis Stupor Sudden  
 death Sudden visual loss Suicidal ideation Suicide attempt  
 Supraventricular tachycardia Surgery Swelling Syncope  
 Synovitis Systemic lupus erythematosus Tachycardia Tearfulness  
 Tenderness Tendon disorder Tendonitis Tension Testicular  
 atrophy Testicular swelling Thirst Thought blocking  
 Throat irritation Thrombocytopenia Thrombocytopenic purpura  
 Thrombocytosis Thrombophlebitis Thrombosis Thrombotic  
 thrombocytopenic purpura Tinnitus Tobacco user Tongue  
 discolouration Tongue disorder Tongue oedema Tooth disorder  
 Toothache Torsade de pointes Toxic epidermal necrolysis  
 Tremor Tubulointerstitial nephritis Type I  
 hypersensitivity Ulcer Upper respiratory tract infection Urethral  
 disorder Urinary hesitation Urinary incontinence Urinary  
 retention Urinary tract disorder Urinary tract infection Urine  
 output increased Urogenital disorder Urticaria Uveitis  
 Vaginal discharge Vaginal infection Vaginal inflammation  
 Varicocele Vascular purpura Vascular resistance systemic  
 Vasculitis Vasodilation procedure Venous thrombosis Ventricular  
 arrhythmia Ventricular extrasystoles Ventricular fibrillation

Ventricular tachycardia      Vertigo      Viral diarrhoea      Viral  
infection      Virilism      Vision blurred      Visual acuity reduced  
Visual impairment      Vitreous detachment      Vitreous floaters  
Vomiting      Vulvovaginal candidiasis      Vulvovaginal mycotic  
infection      Weight decreased      Weight increased      Wheezing      White blood  
cell count decreased      White blood cell disorder      Withdrawal  
hypertension      Withdrawal syndrome

\*\*\*\*\*  
\*\*\*\*\*

Melatonin receptor type 1A - Group: Receptor

Treated with:

ramelteon: approved      small molecule      (20 associated side effects)

For the treatment of insomnia characterized by difficulty with sleep onset.

melatonin: approved, nutraceutical small molecule      (0 associated side effects)      Used orally for jet lag, insomnia, shift-work disorder, circadian rhythm disorders in the blind (evidence for efficacy), and benzodiazepine and nicotine withdrawal. Evidence indicates that melatonin is likely effective for treating circadian rhythm sleep disorders in blind children and adults. It has received FDA orphan drug status as an oral medication for this use. A number of studies have shown that melatonin may be effective for treating sleep-wake cycle disturbances in children and adolescents with mental retardation, autism, and other central nervous system disorders. It appears to decrease the time to fall asleep in children with developmental disabilities, such as cerebral palsy, autism, and mental retardation. It may also improve secondary insomnia associated with various sleep-wake cycle disturbances. Other possible uses for which there is some evidence for include: benzodiazepine withdrawal, cluster headache, delayed sleep phase syndrome (DSPS), primary insomnia, jet lag, nicotine withdrawal, preoperative anxiety and sedation, prostate cancer, solid tumors (when combined with IL-2 therapy in certain cancers), sunburn prevention (topical use), tardive dyskinesia, thrombocytopenia associated with cancer, chemotherapy and other disorders.

agomelatine: approved      small molecule      (0 associated side effects)      Agomelatine is indicated for the treatment of major depressive episodes in adults.

20 known side effects mediated through drugs targeting this protein:

Anaphylactic shock      Anaphylactoid reaction      Arthralgia      Asthenia  
Diarrhoea      Dizziness      Dysgeusia      Fatigue      Headache  
Infection      Influenza      Insomnia      Mental disability  
Musculoskeletal discomfort      Myalgia      Nausea      Respiratory  
tract infection      Somnolence      Thinking abnormal      Upper respiratory  
tract infection

\*\*\*\*\*  
\*\*\*\*\*

Amiloride-sensitive cation channel 2, neuronal - Group: Channel

Treated with:

diclofenac: approved      small molecule      (310 associated side effects)      For the acute and chronic treatment of signs and symptoms of osteoarthritis and rheumatoid arthritis.

amiloride: approved      small molecule      (85 associated side effects)  
For use as adjunctive treatment with thiazide diuretics or



other kaliuretic-diuretic agents in congestive heart failure or hypertension.

330 known side effects mediated through drugs targeting this protein:

Abdominal distension    Abdominal pain upper    Abscess    Acne    Acute coronary syndrome  
Agitation    Agranulocytosis    Alanine aminotransferase increased    Alopecia    Amblyopia    Anaemia  
Anaphylactic shock    Anaphylactoid reaction    Angina pectoris  
Angioedema    Angiopathy    Anorectal disorder    Anxiety  
Aortic dissection    Aphasia    Aphthous stomatitis    Aplastic anaemia  
Application site reaction    Arrhythmia    Arteriosclerosis  
Arthralgia    Aspartate aminotransferase increased    Asthenia  
Asthma    Atrioventricular block    Atrioventricular block  
complete    Atrophy    Azotaemia    Back pain    Bladder pain  
Bladder spasm    Bleeding time prolonged    Blindness  
Blister    Blood creatine phosphokinase increased    Blood creatinine increased  
Blood potassium increased    Body temperature increased  
Bone pain    Bradycardia    Breast disorder    Breath odour  
Bronchitis    Burning sensation    Cardiac disorder    Cardiac failure  
Cardiac failure congestive    Cardiovascular disorder  
Cerebrovascular accident    Chest pain    Chills    Colitis  
ulcerative    Coma    Confusional state    Conjunctival hyperaemia  
Conjunctivitis allergic    Constipation    Convulsion  
Coordination abnormal    Corneal deposits    Corneal disorder  
Corneal erosion    Corneal infiltrates    Corneal oedema  
Corneal opacity    Cough    Cystitis    Cystitis noninfective  
Deafness    Death    Decreased appetite    Dehydration    Dental caries  
Dermatitis bullous    Dermatitis contact    Dermatitis exfoliative  
Diarrhoea    Diarrhoea haemorrhagic    Diplopia    Discomfort  
Disorientation    Disturbance in attention    Disturbance in sexual arousal  
Dizziness    Drug ineffective    Dry mouth    Dry skin  
Dysgeusia    Dyspepsia    Dyspnoea    Dysthymic disorder  
Dysuria    Ear pain    Ecchymosis    Eczema    Encephalopathy  
Enterocolitis haemorrhagic    Eosinophilia    Epistaxis  
Erectile dysfunction    Eructation    Erythema multiforme  
Erythema of eyelid    Eye allergy    Eye disorder    Eye inflammation  
Eye irritation    Eye pain    Eye pruritus  
Eyelid oedema    Eyelids pruritus    Face oedema    Fatigue  
Feeling abnormal    Flatulence    Fluid retention    Flushing  
Foetor hepaticus    Furuncle    Gait disturbance    Gastric pH decreased  
Gastritis    Gastroenteritis    Gastrointestinal disorder  
Gastrointestinal haemorrhage    Gastrointestinal pain    Gingivitis  
Glossitis    Gout    Gynaecomastia    Haematemesis    Haematuria  
Haemoglobin    Haemolytic anaemia    Haemorrhage    Haemorrhoids  
Hair disorder    Hallucination    Headache    Hearing impaired  
Henoch-Schonlein purpura    Hepatic cirrhosis    Hepatic encephalopathy  
Hepatic enzyme increased    Hepatic failure  
Hepatic function abnormal    Hepatic necrosis    Hepatitis  
Hepatitis fulminant    Hepatobiliary disease    Hepatocellular injury  
Hepatorenal syndrome    Hereditary disorder    Hernia  
Herpes simplex    Herpes virus infection    Hyperaemia  
Hyperaesthesia    Hyperchlorhydria    Hypercholesterolaemia  
Hyperglycaemia    Hyperhidrosis    Hyperkinesia  
Hypertension    Hypertonia    Hypertrophy    Hyperventilation

Hypoaesthesia Hypoglycaemia Hypokinesia Hyponatraemia  
 Hypotension Ill-defined disorder Immune system disorder  
 Infarction Infection Infestation Influenza Insomnia  
 Intestinal perforation Intraocular pressure increased  
 Iritis Irritability Jaundice Keratitis Lacrimal  
 disorder Lacrimation increased Laryngeal oedema Laryngitis  
 Laryngospasm Leukopenia Libido decreased Lip swelling  
 Liver disorder Loss of consciousness Lymphadenopathy  
 Malaise Melaena Memory impairment Meningitis aseptic  
 Mental disability Mental disorder Migraine Mouth ulceration  
 Muscle rigidity Muscle spasms Muscular weakness  
 Musculoskeletal discomfort Musculoskeletal pain  
 Musculoskeletal stiffness Myalgia Myocardial infarction  
 Nail disorder Nasal congestion Nausea Neck pain  
 Necrosis Neoplasm malignant Nephritis Nephropathy  
 Nephrotic syndrome Nervous system disorder Nervousness  
 Neuritis Neuropathy peripheral Neutropenia Night blindness  
 Nightmare Nocturia Nodule Nuchal rigidity Ocular  
 hyperaemia Oedema peripheral Oesophageal disorder Oesophagitis  
 Oliguria Oral pruritus Orthostatic hypotension  
 Osteoarthritis Pain Pain in extremity Palpitations  
 Pancreatitis Pancytopenia Papule Paraesthesia  
 Paralysis flaccid Peptic ulcer Pharyngitis Phlebitis  
 Photosensitivity reaction Pneumonia Pollakiuria Polyuria  
 Proctitis Prostatic specific antigen increased Protein  
 urine present Proteinuria Pruritus Psychotic disorder  
 Pulmonary function test decreased Punctate keratitis  
 Purpura Rash Rash maculo-papular Rash pustular  
 Rectal haemorrhage Renal failure acute Renal impairment  
 Renal papillary necrosis Respiratory depression Respiratory  
 disorder Rhinitis Scotoma Seborrhoeic dermatitis Sepsis  
 Shock Sinusitis Skin cancer Skin discolouration Skin  
 exfoliation Skin hypertrophy Skin irritation Skin mass Skin odour  
 abnormal Skin ulcer Sleep disorder Social avoidant behaviour  
 Somnolence Speech disorder Stevens-Johnson syndrome  
 Stomatitis Swelling Syncope Tachycardia Tension  
 Testicular disorder Thinking abnormal Thirst  
 Thrombocytopenia Tic Tinnitus Tongue coated Tooth  
 abscess Toxic epidermal necrolysis Tremor  
 Tubulointerstitial nephritis Ulcerative keratitis Urethral  
 disorder Urinary tract disorder Urine output increased Urticaria  
 Vaginal haemorrhage Vascular purpura Vasculitis  
 Vasodilation procedure Ventricular extrasystoles Vertigo  
 Viral infection Vision blurred Visual acuity reduced  
 Visual impairment Vitreous floaters Vomiting Weight decreased

\*\*\*\*\*  
 \*\*\*\*\*

Gamma-aminobutyric acid receptor subunit theta - Group: Channel  
 Treated with:  
 lorazepam: approved small molecule (126 associated side  
 effects) For the management of anxiety disorders, and for  
 treatment of status epilepticus.  
 temazepam: approved small molecule (35 associated side effects)  
 For the short-term treatment of insomnia (generally 7-10  
 days).

clobazam: illicit,approved small molecule (58 associated side effects) For treatment and management of epilepsy and anxiety disorder.

alprazolam: illicit,approved small molecule (178 associated side effects) For the management of anxiety disorder or the short-term relief of symptoms of anxiety and for the treatment of panic disorder, with or without agoraphobia.

chlordiazepoxide:illicit,approved small molecule (20 associated side effects) For the management of anxiety disorders or for the short-term relief of symptoms of anxiety, withdrawal symptoms of acute alcoholism, and preoperative apprehension and anxiety.

clorazepate: illicit,approved small molecule (0 associated side effects) For the management of anxiety disorders or for the short-term relief of the symptoms of anxiety. Also used as adjunctive therapy in the management of partial seizures and for the symptomatic relief of acute alcohol withdrawal.

midazolam: illicit,approved small molecule (119 associated side effects) For use as a sedative perioperatively.

flurazepam: illicit,approved small molecule (62 associated side effects) For short-term and intermittent use in patients with recurring insomnia and poor sleeping habits

diazepam: illicit,approved small molecule (149 associated side effects) Used in the treatment of severe anxiety disorders, as a hypnotic in the short-term management of insomnia, as a sedative and premedicant, as an anticonvulsant, and in the management of alcohol withdrawal syndrome.

oxazepam: approved small molecule (36 associated side effects) For the treatment of anxiety disorders and alcohol withdrawal.

triazolam: illicit,approved,withdrawn small molecule (66 associated side effects) For the short-term treatment of insomnia.

clonazepam: illicit,approved small molecule (228 associated side effects) Used as an anticonvulsant in the treatment of the Lennox-Gastaut syndrome (petit mal variant), akinetic and myoclonic seizures.

bromazepam: illicit,approved small molecule (47 associated side effects) For the short-term treatment of insomnia, short-term treatment of anxiety or panic attacks, if a benzodiazepine is required, and the alleviation of the symptoms of alcohol- and opiate-withdrawal.

nitrazepam: approved small molecule (44 associated side effects) Used to treat short-term sleeping problems (insomnia), such as difficulty falling asleep, frequent awakenings during the night, and early-morning awakening.

460 known side effects mediated through drugs targeting this protein:

Abdominal discomfort Abdominal distension Abdominal pain  
 Abnormal dreams Abnormal faeces Acidosis Acne Affect  
 lability Ageusia Aggression Agitation Agranulocytosis  
 Akathisia Akinesia Alcohol poisoning Alopecia Altered  
 state of consciousness Amblyopia Amnesia Anaemia  
 Anaphylactic shock Anaphylactoid reaction Anger Angioedema  
 Angiopathy Anorectal discomfort Anorectal disorder  
 Anterograde amnesia Anxiety Aortic dissection Apathy

Aponia      Apnoea      Appetite disorder      Arrhythmia      Arterial  
 spasm      Arthralgia      Aspartate aminotransferase increased      Aspiration  
 Asthenia      Asthma      Ataxia      Athetosis      Atrioventricular  
 block      Back pain      Balance disorder      Bladder dysfunction      Bladder  
 pain      Blindness      Blood alkaline phosphatase increased      Blood  
 bilirubin increased      Blood disorder      Blood glucose decreased  
 Blood thromboplastin decreased      Body temperature decreased  
 Body temperature increased      Borderline personality disorder  
 Bradycardia      Bradyphrenia      Brain oedema      Breast disorder  
 Breast pain      Bronchitis      Bronchospasm      Candidiasis      Carbon  
 dioxide increased      Cardiac arrest      Cardiac disorder      Cardiac failure  
 Cardio-respiratory arrest      Cardiovascular disorder  
 Cellulitis      Cerebellar syndrome      Chest discomfort      Chest pain  
 Chills      Choking sensation      Chorea      Chromaturia      Clonic  
 convulsion      Clonus      Clumsiness      Coagulopathy      Cognitive  
 disorder      Coma      Completed suicide      Confusional state      Connective tissue  
 disorder      Constipation      Conversion disorder      Convulsion  
 Coordination abnormal      Cough      Cyanosis      Cystitis      Cystitis  
 noninfective      Cytolytic hepatitis      Death      Decreased appetite  
 Dehydration      Delirium      Delirium tremens      Delusion      Dependence  
 Depersonalisation      Depressed level of consciousness      Depressed  
 mood      Depression      Depressive symptom      Derealisation      Dermatitis  
 Dermatitis contact      Dermatitis exfoliative      Diarrhoea  
 Diplopia      Discomfort      Disinhibition      Disorientation  
 Disturbance in attention      Disturbance in sexual arousal  
 Dizziness      Drooling      Drug abuse      Drug dependence      Drug  
 eruption      Drug intolerance      Drug withdrawal convulsions      Dry mouth  
 Dysaesthesia      Dysarthria      Dysgeusia      Dyskinesia  
 Dysmenorrhoea      Dyspepsia      Dysphagia      Dysphonia      Dysphoria  
 Dyspnoea      Dysthymic disorder      Dystonia      Dysuria      Ear  
 infection      Ear pain      Ecchymosis      Effusion      Ejaculation delayed  
 Ejaculation failure      Emotional disorder      Emotional  
 distress      Emotional poverty      Encephalopathy      Encopresis      Endometrial  
 sarcoma      Energy increased      Enuresis      Eosinophilia      Epilepsy  
 Epistaxis      Erectile dysfunction      Erythema      Erythema  
 multiforme      Euphoric mood      Extrapyrmidal disorder  
 Extrasystoles      Eye disorder      Eye irritation      Eye  
 movement disorder      Face oedema      Faecal incontinence      Fatigue  
 Feeling abnormal      Feeling cold      Feeling drunk      Feeling hot  
 Feeling jittery      Feeling of body temperature change      Flat affect  
 Flatulence      Floppy infant      Flushing      Fungal infection      Gait  
 disturbance      Galactorrhoea      Gangrene      Gastric disorder      Gastritis  
 Gastrointestinal disorder      Gastrointestinal haemorrhage  
 Gastrointestinal pain      Gingival pain      Glossitis      Glossodynia  
 Gout      Grand mal convulsion      Gynaecomastia      Haematoma  
 Haemoglobin      Haemoglobin decreased      Haemorrhage      Haemorrhage  
 urinary tract      Haemorrhoids      Hallucination      Hangover  
 Headache      Heart rate irregular      Hemiparesis      Hepatic enzyme  
 increased      Hepatic failure      Hepatic function abnormal      Hepatitis  
 Hepatocellular injury      Hepatomegaly      Herpes simplex  
 Herpes virus infection      Hiccups      Hirsutism      Homicidal  
 ideation      Hordeolum      Hostility      Hunger      Hypercapnia  
 Hyperhidrosis      Hyperkinesia      Hyperprolactinaemia  
 Hypersensitivity      Hypersomnia      Hypertension      Hypertonia  
 Hyperventilation      Hypoaesthesia      Hypochromic anaemia

Hypokinesia Hypomania Hyponatraemia Hypopnoea Hypotension  
 Hypothermia Hypotonia Hypoventilation Hypoxia Ill-defined  
 disorder Illusion Inappropriate antidiuretic hormone secretion  
 Incontinence Increased appetite Induration Infection  
 Infectious mononucleosis Infestation Inflammation  
 Influenza Injection site pain Injection site reaction  
 Insomnia Intraocular pressure increased Irritability  
 Jaundice Joint swelling Laryngospasm Lethargy  
 Leukocytosis Leukopenia Libido decreased Libido increased  
 Liver function test abnormal Liver injury Local reaction  
 Logorrhoea Loss of consciousness Loss of libido Lung  
 disorder Lymphadenopathy Major depression Malaise Mania Mean  
 arterial pressure Mediastinal disorder Memory impairment Menstrual  
 disorder Menstruation irregular Mental disability Mental disorder  
 Mental retardation Migraine Miosis Mood swings  
 Motion sickness Movement disorder Muscle relaxant therapy  
 Muscle rigidity Muscle spasms Muscle spasticity Muscle  
 twitching Muscular weakness Musculoskeletal discomfort  
 Musculoskeletal disorder Musculoskeletal stiffness  
 Myalgia Mydriasis Myoclonus Nasal congestion  
 Nasopharyngitis Nausea Necrosis Nervous system  
 disorder Nervousness Neuroleptic malignant syndrome Neuropathy  
 peripheral Neutropenia Nightmare Nocturia Nodal rhythm  
 Nystagmus Obstruction Obstructive airways disorder Oedema  
 Oedema peripheral Oropharyngeal pain Orthostatic  
 hypotension Osteoarthritis Otitis media Pain Pain in extremity  
 Pain in jaw Pallor Palpitations Pancytopenia  
 Paraesthesia Paralysis Paresis Pelvic pain Pericardial  
 effusion Periorbital oedema Personality disorder  
 Phaeochromocytoma Pharyngitis Phlebitis Photophobia  
 Pigmentation disorder Platelet count decreased Pleurisy  
 Pneumonia Pneumothorax Pollakiuria Polyuria Post-  
 traumatic stress disorder Precocious puberty Premenstrual  
 syndrome Presyncope Proctalgia Prothrombin level increased  
 Pruritus Psychomotor retardation Psychotic disorder  
 Puberty Pulmonary congestion Pulmonary function test  
 decreased Pulmonary haemorrhage Pulmonary hypertension Pulmonary  
 oedema Rash Rash maculo-papular Rectal haemorrhage  
 Rectal tenesmus Renal failure Respiratory arrest  
 Respiratory depression Respiratory disorder Respiratory  
 failure Respiratory moniliasis Respiratory rate decreased  
 Respiratory tract congestion Respiratory tract infection  
 Retching Retrograde amnesia Rhinitis allergic Rhinorrhoea  
 Rhonchi Salivary hypersecretion Scotoma Sedation  
 Sexual dysfunction Shock Sinus tachycardia Sinusitis Skin  
 burning sensation Skin discolouration Skin disorder Skin  
 exfoliation Skin necrosis Sleep apnoea syndrome Sleep disorder  
 Sleep talking Sluggishness Sneezing Somnambulism  
 Somnolence Speech disorder Stevens-Johnson syndrome  
 Stomatitis Strabismus Stridor Stupor Substance abuse  
 Suicidal ideation Swelling Swelling face Swollen tongue  
 Syncope Tachycardia Tachypnoea Tenderness Tendonitis  
 Tension Therapeutic response decreased Thinking abnormal  
 Thirst Thrombocytopenia Thrombocytosis Thrombophlebitis  
 Thrombosis Tinnitus Tongue coated Tongue disorder

Tongue oedema      Tooth disorder      Toothache      Toxic epidermal  
necrolysis      Transaminases increased      Tremor      Tropical spastic  
paresis      Upper airway obstruction      Upper respiratory tract  
infection      Urethral disorder      Urinary incontinence      Urinary retention  
Urinary tract disorder      Urinary tract infection      Urine  
colour abnormal      Urine output increased      Urticaria      Vaginal infection  
Vaginal inflammation      Vasodilation procedure      Venous thrombosis  
Ventricular arrhythmia      Ventricular extrasystoles      Vertigo  
Viral infection      Vision blurred      Visual acuity reduced  
Visual impairment      Vomiting      Weight decreased      Weight increased  
Wheezing      Withdrawal syndrome      Xeroderma      Xerophthalmia  
Yawning

\*\*\*\*\*  
\*\*\*\*\*

High affinity interleukin-8 receptor A - Group: Receptor

Treated with:

ketoprofen: approved      small molecule      (126 associated side effects)  
For symptomatic treatment of acute and chronic rheumatoid arthritis, osteoarthritis, ankylosing spondylitis, primary dysmenorrhea and mild to moderate pain associated with musculotendinous trauma (sprains and strains), postoperative (including dental surgery) or postpartum pain.

126 known side effects mediated through drugs targeting this protein:

Abdominal pain      Acute coronary syndrome      Agranulocytosis  
Alopecia      Amnesia      Anaemia      Anaphylactic shock  
Angiopathy      Arrhythmia      Blood urea increased      Bronchospasm  
Cardiac failure      Cardiac failure congestive      Chills  
Colitis ulcerative      Confusional state      Conjunctivitis  
Constipation      Deafness      Decreased appetite      Dermatitis  
bullous      Dermatitis exfoliative      Diabetes mellitus      Diarrhoea  
Discomfort      Dizziness      Dry mouth      Dysgeusia      Dyspepsia  
Dysphoria      Dyspnoea      Eczema      Epistaxis      Erectile  
dysfunction      Eructation      Erythema      Erythema multiforme      Eye pain  
Face oedema      Feeling abnormal      Flatulence      Gastritis  
Gastrointestinal disorder      Gastrointestinal haemorrhage  
Gastrointestinal pain      Gastrointestinal perforation  
Gynaecomastia      Haematemesis      Haematuria      Haemoglobin  
Haemolysis      Haemoptysis      Haemorrhage      Hallucination      Headache  
Hearing impaired      Hepatic function abnormal      Hepatitis  
cholestatic      Hyperhidrosis      Hypersensitivity      Hypertension  
Hyponatraemia      Ill-defined disorder      Increased appetite  
Infarction      Infection      Insomnia      Intestinal ulcer      Jaundice  
Laryngeal oedema      Malaise      Melaena      Meningitis aseptic  
Menometrorrhagia      Migraine      Musculoskeletal discomfort  
Myalgia      Myocardial infarction      Nausea      Necrosis  
Nephritis      Nephrotic syndrome      Nervousness      Nightmare  
Oedema      Onycholysis      Palpitations      Pancreatitis  
Paraesthesia      Peptic ulcer      Peripheral vascular disorder  
Personality disorder      Pharyngitis      Photosensitivity reaction  
Pigmentation disorder      Pruritus      Purpura      Rash      Rectal  
haemorrhage      Renal failure      Renal impairment      Retinal haemorrhage  
Rhinitis      Salivary hypersecretion      Sepsis      Shock      Sicca  
syndrome      Skin discolouration      Somnolence      Stomatitis      Tachycardia

Tension Thirst Thrombocytopenia Tinnitus Toxic  
epidermal necrolysis Tubulointerstitial nephritis Ulcer Urticaria  
Vascular purpura Vasodilation procedure Vertigo Visual  
impairment Vomiting Weight decreased Weight increased  
\*\*\*\*\*  
\*\*\*\*\*

Metabotropic glutamate receptor 7 - Group: Receptor

Treated with:

l-glutamic acid: approved, nutraceutical small molecule (0 associated side effects) Considered to be nature's "Brain food" by improving mental capacities; helps speed the healing of ulcers; gives a "lift" from fatigue; helps control alcoholism, schizophrenia and the craving for sugar.

known side effects mediated through drugs targeting this protein:

\*\*\*\*\*  
\*\*\*\*\*

Fibroblast growth factor receptor 4 - Group: Enzyme

Treated with:

palifermin: approved biotech (0 associated side effects) For treatment of oral mucositis associated with chemotherapy and radiation therapy.

known side effects mediated through drugs targeting this protein:

\*\*\*\*\*  
\*\*\*\*\*

Glutamate receptor delta-2 subunit - Group: Channel

Treated with:

l-glutamic acid: approved, nutraceutical small molecule (0 associated side effects) Considered to be nature's "Brain food" by improving mental capacities; helps speed the healing of ulcers; gives a "lift" from fatigue; helps control alcoholism, schizophrenia and the craving for sugar.

known side effects mediated through drugs targeting this protein:

\*\*\*\*\*  
\*\*\*\*\*

Thyroid hormone receptor alpha - Group: Receptor

Treated with:

liothyronine: approved small molecule (0 associated side effects) Used as replacement or supplemental therapy in patients with hypothyroidism of any etiology, except transient hypothyroidism during the recovery phase of subacute thyroiditis.

levothyroxine: approved small molecule (0 associated side effects) For use alone or in combination with antithyroid agents to treat hypothyroidism, goiter, chronic lymphocytic thyroiditis, myxedema coma, and stupor.

dextrothyroxine: approved small molecule (0 associated side effects) Used to lower high cholesterol levels in the blood.

liotrix: approved small molecule (0 associated side effects)

May be used to treat primary, secondary or tertiary hypothyroidism. May also be used to suppress thyroid stimulating

hormone (TSH) secretion in patients with simple (nontoxic) goiter, subacute or chronic lymphocytic thyroiditis multinodular goiter, and in the management of thyroid cancer. May be used in conjunction with other antithyroid agents to treat thyrotoxicosis to prevent goitrogenesis and hypothyroidism. May also be used for differential diagnosis of suspected mild hyperthyroidism or thyroid gland autonomy.

3,5-dichloro-4-[(4-hydroxy-3-isopropylphenoxy)phenyl]acetic acid:  
experimental small molecule (0 associated side effects)

known side effects mediated through drugs targeting this protein:

\*\*\*\*\*  
\*\*\*\*\*

Glutamate [NMDA] receptor subunit 3A - Group: Channel

Treated with:

l-glutamic acid: approved, nutraceutical small molecule (0 associated side effects) Considered to be nature's "Brain food" by improving mental capacities; helps speed the healing of ulcers; gives a "lift" from fatigue; helps control alcoholism, schizophrenia and the craving for sugar.

tramadol: approved small molecule (490 associated side effects) Indicated in the treatment of moderate to severe pain. Consider for those prone to constipation or respiratory depression. Tramadol is used to treat postoperative, dental, cancer, and acute musculoskeletal pain and as an adjuvant to NSAID therapy in patients with osteoarthritis.

methadone: approved small molecule (87 associated side effects) For the treatment of dry cough, drug withdrawal syndrome, opioid type drug dependence, and pain.

ethopropazine: approved small molecule (0 associated side effects) For use in the treatment of Parkinson's disease and also used to control severe reactions to certain medicines such as reserpine.

dextromethorphan: approved small molecule (0 associated side effects) For treatment and relief of dry cough.

acamprosate: approved small molecule (212 associated side effects) For the maintenance of abstinence from alcohol in patients with alcohol dependence who are abstinent at treatment initiation

procaine: approved small molecule (43 associated side effects) Used as a local anesthetic primarily in oral surgery

ethanol: approved small molecule (11 associated side effects) For therapeutic neurolysis of nerves or ganglia for the relief of intractable chronic pain in such conditions as inoperable cancer and trigeminal neuralgia (tic douloureux), in patients for whom neurosurgical procedures are contraindicated.

amantadine: approved small molecule (90 associated side effects) For the chemoprophylaxis, prophylaxis, and treatment of signs and symptoms of infection caused by various strains of influenza A virus. Also for the treatment of parkinsonism and drug-induced extrapyramidal reactions.

felbamate: approved small molecule (249 associated side effects) For use only in those patients who respond inadequately to alternative treatments and whose epilepsy is so severe that a



substantial risk of aplastic anemia and/or liver failure is deemed acceptable in light of the benefits conferred by its use.

memantine: approved small molecule (250 associated side effects) For the treatment of moderate to severe dementia of the Alzheimer's type.

halothane: approved small molecule (10 associated side effects) For the induction and maintenance of general anesthesia

chloroprocaine: approved small molecule (34 associated side effects) For the production of local anesthesia by infiltration and peripheral nerve block. They are not to be used for lumbar or caudal epidural anesthesia.

orphenadrine: approved small molecule (28 associated side effects) Indicated for the treatment of Parkinson's disease.

ketamine: approved small molecule (35 associated side effects) For use as the sole anesthetic agent for diagnostic and surgical procedures that do not require skeletal muscle relaxation.

tenocyclidine: illicit, experimental small molecule (0 associated side effects) Because of its high affinity for the phencyclidine binding site on the NMDA receptor, the 3H radiolabelled form of tenocyclidine is widely used in research into NMDA receptors.

rolicyclidine: illicit, experimental small molecule (0 associated side effects) Rolicyclidine has anesthetic properties and can induce a sedative effect.

711 known side effects mediated through drugs targeting this protein:

Abdominal discomfort Abdominal distension Abdominal pain lower  
Abdominal pain upper Abdominal tenderness Abnormal  
behaviour Abnormal dreams Abnormal faeces Abscess Acidosis  
Acne Acute coronary syndrome Acute leukaemia Acute  
myocardial infarction Acute respiratory failure Affect lability  
Aggression Agitation Agranulocytosis Alanine  
aminotransferase decreased Alanine aminotransferase increased  
Albuminuria Alcoholism Alopecia Altered state of  
consciousness Amblyopia Amenorrhoea Amnesia Anaemia  
Analgesic therapy Anaphylactic shock Anaphylactoid reaction  
Anencephaly Aneurysm Angina pectoris Angina unstable  
Angioedema Angiopathy Anorectal disorder Anosmia  
Antinuclear antibody positive Anxiety Aortic aneurysm  
Aortic dissection Apathy Aphasia Aplastic anaemia  
Apnoea Appendicitis Arachnoiditis Arrhythmia  
Arrhythmia supraventricular Arterial occlusive disease  
Arthralgia Arthritis Arthropathy Ascites Aspartate  
aminotransferase increased Aspiration Asthenia Asthma  
Ataxia Atrial fibrillation Atrial flutter  
Atrioventricular block Azotaemia Back disorder Back pain  
Benign breast neoplasm Biliary tract disorder Bipolar I  
disorder Bipolar disorder Bladder pain Blepharitis Blindness  
Blister Blood alkaline phosphatase increased Blood  
amylase increased Blood bilirubin increased Blood cholesterol  
increased Blood creatine phosphokinase increased Blood creatinine  
increased Blood glucose abnormal Blood glucose increased Blood  
lactate dehydrogenase increased Blood potassium abnormal Blood  
potassium decreased Blood potassium increased Blood pressure

increased Blood sodium increased Blood triglycerides increased  
 Blood urea increased Blood uric acid increased Body  
 temperature decreased Body temperature increased Bone disorder  
 Bone pain Bradycardia Brain oedema Breast cancer  
 Breast disorder Breast neoplasm Breath odour Bronchitis  
 Bronchospasm Burning sensation Bursitis Cardiac arrest  
 Cardiac disorder Cardiac failure Cardiac failure congestive  
 Cardiac fibrillation Cardiac flutter Cardiac murmur  
 Cardiac output decreased Cardiomyopathy Cardiovascular  
 disorder Carpal tunnel syndrome Cataract Cellulitis Cerebral  
 haemorrhage Cerebral infarction Cerebrovascular accident  
 Cerebrovascular disorder Cerumen impaction Change of bowel  
 habit Chest discomfort Chest pain Chills Cholecystitis  
 Cholelithiasis Choreoathetosis Chronic hepatitis Clonus  
 Coagulopathy Cognitive disorder Cold sweat Colitis  
 Coma Completed suicide Confusional state Congenital anomaly  
 Congenital genital malformation Conjunctival haemorrhage  
 Conjunctivitis Connective tissue disorder Constipation  
 Convulsion Coordination abnormal Corneal oedema Corneal  
 opacity Cough Cranial nerve paralysis Crocodile tears  
 syndrome Crying Crystal urine Crystalluria Cystitis  
 Cystitis noninfective Deafness Death Decreased appetite  
 Deep vein thrombosis Dehydration Delirium Delusion  
 Dependence Depersonalisation Depressed level of consciousness  
 Dermal cyst Dermatitis atopic Dermatitis bullous Dermatitis  
 contact Dermatitis exfoliative Dermoid cyst Developmental  
 delay Diabetes mellitus Diarrhoea Diplopia Discomfort  
 Disorientation Disseminated intravascular coagulation  
 Dissociation Disturbance in attention Disturbance in  
 sexual arousal Diverticulitis Diverticulum Dizziness Drug  
 abuse Drug dependence Drug interaction Drug withdrawal syndrome  
 Dry eye Dry mouth Dry skin Dry throat Duodenal ulcer  
 Dysarthria Dysgeusia Dyskinesia Dysmenorrhoea Dyspepsia  
 Dysphagia Dysphoria Dyspnoea Dystonia Dysuria Ear  
 congestion Ear discomfort Ear infection Ear pain Ecchymosis  
 Eczema Effusion Ejaculation disorder Electrocardiogram  
 QT prolonged Electrocardiogram abnormal Electrocardiogram  
 change Embolism Emotional disorder Encephalocele  
 Encephalopathy Endocrine disorder Endophthalmitis  
 Enteritis Eosinophil count increased Eosinophilia  
 Epilepsy Epistaxis Erectile dysfunction Eructation  
 Erysipelas Erythema Erythema multiforme Euphoric mood  
 Eustachian tube disorder Exostosis Extrapyrarnidal  
 disorder Extrasystoles Eye disorder Eye pain Eyelid  
 disorder Eyelid ptosis Face oedema Faecal incontinence  
 Faecalith Faecaloma Faeces discoloured Fasciitis  
 Fatigue Feeling abnormal Feeling cold Feeling hot  
 Feeling jittery Flashback Flat affect Flatulence Flushing  
 Foetal disorder Fungal infection Gait disturbance Gamma-  
 glutamyltransferase increased Gangrene Gastric dilatation  
 Gastric disorder Gastric ulcer Gastritis Gastroenteritis  
 Gastrointestinal disorder Gastrointestinal haemorrhage  
 Gastrointestinal infection Gastrointestinal pain  
 Gastrointestinal tract irritation Gastrooesophageal reflux  
 disease Gingival bleeding Glaucoma Glossitis Goitre Gout

Grand mal convulsion Groin pain Gynaecomastia  
 Haematemesis Haematochezia Haematocrit decreased  
 Haematocrit increased Haematoma Haematuria Haemoglobin  
 decreased Haemoglobin increased Haemolytic anaemia Haemolytic  
 uraemic syndrome Haemoptysis Haemorrhage Haemorrhage intracranial  
 Hair disorder Hallucination Headache Hearing impaired  
 Helicobacter infection Hemianopia Hemiplegia Hepatic cirrhosis  
 Hepatic enzyme increased Hepatic failure Hepatic function  
 abnormal Hepatic necrosis Hepatic neoplasm malignant Hepatitis  
 Hepatitis cholestatic Hepatobiliary disease Hepatorenal  
 syndrome Hernia Herpes simplex Herpes virus infection  
 Herpes zoster Hiccups High density lipoprotein decreased  
 Hordeolum Hormone level abnormal Hostility Hot flush  
 Hyperaesthesia Hyperammonaemia Hyperbilirubinaemia  
 Hypercalcaemia Hypercalciuria Hypercholesterolaemia  
 Hyperglycaemia Hyperhidrosis Hyperkalaemia  
 Hyperkeratosis Hyperkinesia Hyperlipidaemia  
 Hypernatraemia Hyperpyrexia Hyperreflexia  
 Hypersensitivity Hypersexuality Hypertension Hypertonia  
 Hypertiglyceridaemia Hyperuricaemia Hyperventilation  
 Hypoaesthesia Hypocalcaemia Hypochromic anaemia  
 Hypoglycaemia Hypokalaemia Hypokinesia Hypomagnesaemia  
 Hyponatraemia Hypophosphataemia Hypotension Hypothermia  
 Hypothyroidism Hypovitaminosis Hypoxia Ileus Ill-defined  
 disorder Immune system disorder Inappropriate antidiuretic hormone  
 secretion Incontinence Increased appetite Infarction  
 Infection Infestation Inflammation Influenza Influenza  
 like illness Ingrowing nail Insomnia Intermittent  
 claudication International normalised ratio increased  
 Interstitial lung disease Intestinal functional disorder  
 Intestinal obstruction Intra-uterine death Irritability  
 Irritable bowel syndrome Ischaemia Jaundice Joint  
 crepitation Joint stiffness Joint swelling Keratitis  
 Labyrinthitis Lacrimal disorder Lacrimation increased  
 Laryngeal oedema Laryngitis Laryngospasm Leiomyoma  
 Lethargy Leukaemia Leukocytosis Leukopenia Libido  
 decreased Libido increased Lichen planus Lip blister Livedo  
 reticularis Liver function test abnormal Lividity Localised  
 infection Loss of consciousness Low density lipoprotein increased  
 Lymphadenopathy Lymphocyte count decreased Lymphocyte count  
 increased Lymphocytosis Lymphoma Lymphoproliferative disorder  
 Macular degeneration Macule Malaise Mammogram  
 abnormal Mania Mean cell volume Mean cell volume increased  
 Mediastinal disorder Megacolon Melaena Meningism  
 Meningitis Menometrorrhagia Menopausal symptoms Menopause  
 Menorrhagia Menstrual disorder Mental disability Mental  
 disorder Mental disorder due to a general medical condition  
 Mental retardation Mesenteric occlusion Metrorrhagia  
 Microcephaly Micturition disorder Micturition urgency  
 Migraine Miosis Monocyte count increased Monocytosis  
 Mononeuritis Mood swings Mouth ulceration Mucous membrane  
 disorder Muscle contractions involuntary Muscle rigidity  
 Muscle spasms Muscle spasticity Muscle twitching Muscular  
 weakness Musculoskeletal chest pain Musculoskeletal discomfort  
 Musculoskeletal disorder Musculoskeletal stiffness

Myalgia Mydriasis Myeloid leukaemia Myocardial infarction  
 Myocardial ischaemia Myoclonus Myopathy Myopia Nasal  
 congestion Nasal dryness Nasal oedema Nasopharyngitis  
 Nausea Neck pain Necrosis Necrosis ischaemic  
 Neoplasm Neoplasm malignant Nephrolithiasis Nephrotic  
 syndrome Nervous system disorder Nervousness Neuralgia  
 Neuritis Neuroleptic malignant syndrome Neuropathy  
 peripheral Neurosis Neutropenia Neutrophil count decreased  
 Neutrophil count increased Night sweats Nightmare  
 Nocturia Nuchal rigidity Nystagmus Obstruction Obstructive  
 airways disorder Oedema mucosal Oedema peripheral Oesophageal  
 disorder Oesophageal ulcer Oesophagitis Oliguria Optic nerve  
 disorder Oral pain Oropharyngeal discomfort Oropharyngeal  
 pain Orthostatic hypotension Osteoarthritis Osteonecrosis  
 Osteopenia Osteoporosis Otitis externa Otitis media  
 Pain in extremity Pallor Palpitations Pancreatitis  
 Pancreatitis acute Pancytopenia Panophthalmitis  
 Paraesthesia Paralysis Paranoia Pathological fracture  
 Pathological gambling Pelvic pain Peripheral ischaemia  
 Peripheral vascular disorder Personality disorder Pharyngitis  
 Phlebitis Photophobia Photopsia Photosensitivity allergic  
 reaction Photosensitivity reaction Piloerection Placental  
 disorder Plantar fasciitis Platelet count decreased Platelet  
 disorder Pleural disorder Pleural effusion Pneumonia Pneumonia  
 aspiration Pollakiuria Polyp Polyuria Poor peripheral circulation  
 Productive cough Prostatic disorder Prostatitis  
 Prostatomegaly Protein total decreased Protein urine  
 present Proteinuria Prothrombin time shortened Prurigo  
 Pruritus Pruritus generalised Pruritus genital  
 Pseudocholinesterase deficiency Psoriasis Psychotic  
 disorder Pulmonary embolism Pulmonary function test decreased  
 Pulmonary haemorrhage Pulmonary oedema Purpura Rales Rash  
 Rash erythematous Rash maculo-papular Rash morbilliform Rash  
 papular Rash pustular Rectal haemorrhage Rectal prolapse  
 Red blood cell count decreased Red blood cell count  
 increased Red blood cell sedimentation rate increased Renal  
 failure Renal failure acute Renal function test abnormal Renal  
 impairment Renal pain Respiratory arrest Respiratory depression  
 Respiratory disorder Respiratory failure Respiratory tract  
 infection viral Retching Retinal detachment Retinal  
 haemorrhage Rhabdomyolysis Rheumatoid arthritis Rhinitis  
 Rhinitis allergic Rhinitis seasonal Rhinorrhoea Rhonchi  
 Rosacea Salivary hypersecretion Scleral haemorrhage  
 Seasonal allergy Sedation Sepsis Sexual dysfunction  
 Shock Sinus congestion Sinus headache Sinus tachycardia  
 Sinusitis Skin disorder Skin odour abnormal Skin ulcer  
 Sleep apnoea syndrome Sleep disorder Small intestinal  
 obstruction Sneezing Social avoidant behaviour Somnolence  
 Speech disorder Status epilepticus Stevens-Johnson  
 syndrome Sticky skin Stomach dilation procedure Stomatitis  
 Stupor Sudden death Sudden infant death syndrome  
 Suicidal ideation Suicide attempt Supraventricular tachycardia  
 Swelling Syncope Synovial cyst Tachycardia Tachypnoea  
 Tardive dyskinesia Tenderness Tendon disorder Tendonitis  
 Tension Thinking abnormal Thirst Throat irritation

Thrombocytopenia Thrombocytopenic purpura Thrombocytosis  
 Thrombophlebitis Thrombosis Thrombotic thrombocytopenic  
 purpura Thyroid neoplasm Tinea pedis Tinnitus Tongue disorder  
 Tongue oedema Tooth abscess Tooth disorder Tooth  
 impacted Tooth infection Toothache Torsade de pointes  
 Torticollis Toxic epidermal necrolysis Tracheitis Transient  
 ischaemic attack Tremor Ulcer Upper respiratory tract infection  
 Urethral disorder Urinary hesitation Urinary incontinence  
 Urinary retention Urinary tract disorder Urinary tract  
 infection Urine abnormality Urine analysis abnormal Urine  
 output increased Urogenital disorder Urticaria Uterine leiomyoma  
 Uterovaginal prolapse Vaginal cyst Vaginal discharge  
 Vaginal haemorrhage Vaginal infection Vaginal inflammation  
 Varicose vein Vascular dementia Vascular insufficiency  
 Vascular purpura Vasculitis Vasodilation procedure Venous  
 thrombosis Ventricular fibrillation Ventricular tachycardia  
 Vertigo Viral diarrhoea Viral infection Vision blurred  
 Visual acuity reduced Visual impairment Vomiting Weight  
 decreased Weight increased White blood cell count increased  
 Withdrawal syndrome Wound haemorrhage Wound infection X-  
 linked lymphoproliferative syndrome Xerophthalmia Yawning  
 \*\*\*\*\*  
 \*\*\*\*\*

Monocarboxylate transporter 5 - Group: Transporter

Treated with:

pyruvic acid: approved, nutraceutical small molecule (0  
 associated side effects) For nutritional supplementation, also  
 for treating dietary shortage or imbalance

known side effects mediated through drugs targeting this protein:

\*\*\*\*\*  
 \*\*\*\*\*

Neuronal acetylcholine receptor subunit beta-3 - Group: Channel

Treated with:

nicotine: approved small molecule (98 associated side effects)  
 For the relief of nicotine withdrawal symptoms and as an aid  
 to smoking cessation.

galantamine: approved small molecule (160 associated side  
 effects) For the treatment of mild to moderate dementia of the  
 Alzheimer's type. Has also been investigated in patients with mild  
 cognitive impairment who did not meet the diagnostic criteria for  
 Alzheimer's disease.

213 known side effects mediated through drugs targeting this  
 protein:

Abdominal discomfort Abdominal pain Acne Affect lability  
 Aggression Agitation Amnesia Anaemia Anxiety  
 Apathy Aphasia Apraxia Arrhythmia Arrhythmia  
 supraventricular Arthralgia Arthritis Asthenia Ataxia  
 Atrial fibrillation Atrioventricular block Back pain  
 Bladder pain Blindness Blister Blood alkaline  
 phosphatase increased Blood urea increased Body temperature  
 increased Bone pain Bradycardia Bronchitis Bronchospasm  
 Bundle branch block Cardiac failure Cardiac fibrillation

Cardiovascular disorder      Cataract      Cerebrovascular  
 accident      Cerebrovascular disorder      Chest discomfort      Chest pain  
 Coagulopathy      Completed suicide      Confusional state  
 Constipation      Convulsion      Coordination abnormal      Cough  
 Cystitis      Cystitis noninfective      Decreased appetite  
 Dehydration      Delirium      Dependence      Depression      Dermatitis  
 Dermatitis bullous      Diarrhoea      Discomfort      Disturbance in  
 attention      Disturbance in sexual arousal      Diverticulitis  
 Dizziness      Drug abuse      Drug dependence      Dry mouth      Dysgeusia  
 Dysmenorrhoea      Dyspepsia      Dysphagia      Dysphonia      Dyspnoea  
 Ear pain      Electrocardiogram      QT prolonged      Electrocardiogram  
 T wave inversion      Epistaxis      Eye disorder      Eye irritation  
 Fatigue      Feeling abnormal      Flat affect      Flatulence      Flushing  
 Gastric disorder      Gastritis      Gastroenteritis      Gastrointestinal  
 haemorrhage      Gastrointestinal pain      Gravitational oedema      Haematuria  
 Haemoglobin      Haemorrhage      Hallucination      Headache      Hepatic  
 enzyme increased      Hepatitis      Hepatobiliary disease      Hiccups  
 Hyperglycaemia      Hyperhidrosis      Hyperkinesia  
 Hypersensitivity      Hypersomnia      Hypertension      Hypertonia  
 Hypoaesthesia      Hypokalaemia      Hypokinesia      Hypotension      Ill-  
 defined disorder      Immune system disorder      Incontinence      Increased  
 appetite      Increased bronchial secretion      Infarction      Infection  
 Influenza      Insomnia      Irritability      Ischaemia      Lacrimation  
 increased      Lethargy      Libido increased      Liver disorder      Loss of  
 consciousness      Lower gastrointestinal haemorrhage      Malaise  
 Melaena      Menstrual disorder      Mental disability      Mental  
 disorder      Migraine      Mood swings      Muscle contractions involuntary  
 Muscle spasms      Musculoskeletal discomfort      Musculoskeletal  
 disorder      Myalgia      Myocardial ischaemia      Nasal congestion      Nasal  
 discomfort      Nasal ulcer      Nasopharyngitis      Nausea      Nephrolithiasis  
 Nervous system disorder      Nervousness      Neuropathy peripheral  
 Nightmare      Nocturia      Oedema      Oedema peripheral      Oesophageal  
 disorder      Oesophageal perforation      Orthostatic hypotension  
 Pain      Pain in extremity      Pain in jaw      Palpitations  
 Paraesthesia      Paranoia      Pharyngitis      Pneumonia      Pollakiuria  
 Pruritus      Purpura      Rash      Rectal haemorrhage      Renal  
 failure      Respiratory disorder      Respiratory tract infection  
 Rhinitis      Rhinorrhoea      Salivary hypersecretion      Sensory  
 loss      Shock      Sinusitis      Sleep disorder      Sneezing      Somnolence  
 Sputum increased      Stomatitis      Suicidal ideation      Suicide attempt  
 Supraventricular tachycardia      Syncope      Tachycardia      Tension  
 Throat irritation      Thrombocytopenia      Thrombocytosis      Tinnitus  
 Tobacco user      Tooth disorder      Transient ischaemic attack  
 Tremor      Ulcer      Upper respiratory tract infection      Urethral  
 disorder      Urinary incontinence      Urinary retention      Urinary tract  
 disorder      Urinary tract infection      Vascular dementia      Vascular  
 purpura      Ventricular tachycardia      Vertigo      Vision blurred  
 Visual acuity reduced      Visual impairment      Vomiting      Weight  
 decreased      Weight increased      Withdrawal syndrome

\*\*\*\*\*  
 \*\*\*\*\*

Endothelin B receptor - Group: Receptor

Treated with:

bosentan: approved      small molecule      (196 associated side  
 effects)      Used in the treatment of pulmonary arterial hypertension

(PAH), to improve exercise ability and to decrease the rate of clinical worsening (in patients with WHO Class III or IV symptoms). sitaxentan: approved small molecule (402 associated side effects) Investigated for use/treatment in pulmonary hypertension, connective tissue diseases, hypertension, and congestive heart failure.

492 known side effects mediated through drugs targeting this protein:

Abdominal discomfort Abdominal distension Abdominal hernia  
 Abdominal pain upper Abdominal strangulated hernia  
 Abdominal tenderness Abortion spontaneous Abscess  
 Acidosis Acrochordon Activated partial thromboplastin time  
 prolonged Acute coronary syndrome Acute sinusitis Affect  
 lability Agitation Alanine aminotransferase increased Alopecia  
 Alveolitis allergic Amenorrhoea Amyotrophic lateral  
 sclerosis Anaemia Anal pruritus Anal skin tags  
 Anaphylactic shock Aneurysm Angina pectoris Angioedema  
 Angiopathy Anorectal discomfort Anxiety Aortic dissection  
 Appendicitis Arrhythmia Arteriovenous fistula Arthralgia  
 Arthritis Arthritis bacterial Arthritis infective  
 Ascites Aspartate aminotransferase increased Aspiration  
 Asthenia Asthma Ataxia Atrial fibrillation  
 Atrial flutter Atrial septal defect Atrioventricular block  
 Atrioventricular block complete Atrioventricular block first  
 degree Atrophy Back pain Basal cell carcinoma Bladder  
 disorder Bladder pain Blister Blood alkaline phosphatase  
 increased Blood bicarbonate decreased Blood bilirubin increased  
 Blood creatine phosphokinase increased Blood creatinine  
 increased Blood glucose increased Blood lactate dehydrogenase  
 increased Blood potassium decreased Blood potassium increased  
 Blood pressure increased Blood pressure systolic decreased  
 Blood uric acid increased Body temperature increased Bone  
 disorder Bone marrow toxicity Bradycardia Breast calcifications  
 Breast disorder Breast pain Breast tenderness Bronchitis  
 Bronchospasm Candidiasis Cardiac arrest Cardiac disorder  
 Cardiac failure chronic Cardiac failure congestive  
 Cardiac fibrillation Cardiac flutter Cardiac murmur  
 Cardiac septal defect Cellulitis Cerebrovascular accident  
 Cerumen impaction Chest discomfort Chest pain Chills  
 Cholecystitis chronic Cholelithiasis Cholestasis Chromaturia  
 Coagulation time prolonged Colitis Colonic polyp  
 Confusional state Conjunctival haemorrhage Conjunctival  
 hyperaemia Conjunctivitis Conjunctivitis allergic Connective  
 tissue inflammation Constipation Convulsion Cough Cystitis  
 Cystitis noninfective Deafness Decreased appetite  
 Dehydration Depressed level of consciousness Dermatitis  
 Dermatitis atopic Dermatitis bullous Dermatitis contact  
 Diarrhoea Dilatation atrial Discomfort Disease progression  
 Disturbance in attention Disturbance in sexual arousal  
 Diverticulum Dizziness Dizziness postural Drug  
 hypersensitivity Dry mouth Dry skin Dry throat Duodenal ulcer  
 Dysaesthesia Dyspepsia Dysphonia Dyspnoea Dyspnoea  
 exertional Dyspnoea paroxysmal nocturnal Dysuria Ear  
 congestion Ear discomfort Ear infection Ear pain Ecchymosis

Eczema Effusion Electrocardiogram QT prolonged  
 Electrocardiogram change Embolism Endocrine disorder  
 Enteritis Eosinophil count increased Eosinophilia  
 Epistaxis Eructation Erythema Erythema multiforme  
 Extrasystoles Eye disorder Eye infection Eye  
 inflammation Eye irritation Eye oedema Eye pruritus  
 Eyelid ptosis Facial pain Faecal incontinence Fatigue  
 Feeling abnormal Feeling cold Feeling hot Fibromyalgia  
 Fistula Flank pain Flatulence Fluid retention Flushing  
 Frequent bowel movements Fungal infection Furuncle  
 Gallbladder disorder Gastritis Gastritis viral  
 Gastroenteritis Gastroenteritis bacterial Gastrointestinal  
 disorder Gastrointestinal haemorrhage Gastrointestinal infection  
 Gastrointestinal pain Gingival pain Gingivitis Glossodynia  
 Glucose tolerance impaired Goitre Gout Gouty tophus  
 Groin pain Haematochezia Haematocrit decreased Haematocrit  
 increased Haematoma Haematuria Haemoglobin decreased Haemoglobin  
 increased Haemolysis Haemoptysis Haemorrhage Haemorrhoids Head  
 discomfort Headache Heart rate irregular Hemiparesis Hepatic  
 cirrhosis Hepatic enzyme increased Hepatic failure Hepatic  
 function abnormal Hepatitis Hepatobiliary disease Hepatomegaly  
 Hernia Herpes simplex Herpes virus infection Herpes  
 zoster Hiccups Hormone level abnormal Hydrocephalus  
 Hyperaemia Hyperaesthesia Hyperbilirubinaemia  
 Hypercholesterolaemia Hyperglycaemia Hyperhidrosis  
 Hyperkalaemia Hypernatraemia Hypersensitivity  
 Hyperthermia Hypertrophy Hypoaesthesia Hypocalcaemia  
 Hypoglycaemia Hypokalaemia Hyponatraemia Hypotension  
 Hypoxia Ill-defined disorder Immune system disorder  
 Incontinence Increased appetite Infarction Infection  
 Infestation Inflammation Influenza Insomnia  
 International normalised ratio increased Intertrigo  
 Intestinal obstruction Irritability Ischaemia Ischaemic  
 stroke Jaundice Joint stiffness Keratitis  
 Keratoconjunctivitis sicca Lacrimation increased Lactic  
 acidosis Leiomyoma Lethargy Leukopenia Libido increased Liver  
 function test abnormal Lobar pneumonia Localised infection  
 Localised oedema Loss of consciousness Lower respiratory  
 tract infection Lung infection Lymphoma Malaise Mediastinal  
 disorder Memory impairment Menopausal symptoms Menopause  
 Menorrhagia Mental disability Mental disorder Metrorrhagia  
 Migraine Mood swings Mouth haemorrhage Mouth ulceration  
 Muscle atrophy Muscle fatigue Muscle haemorrhage  
 Muscle spasms Muscle twitching Muscular weakness  
 Musculoskeletal chest pain Musculoskeletal discomfort  
 Musculoskeletal disorder Musculoskeletal pain  
 Musculoskeletal stiffness Myeloproliferative disorder  
 Myocardial infarction Nail hypertrophy Nasal congestion  
 Nasopharyngitis Nausea Necrosis Neoplasm Neoplasm  
 malignant Nephritis Nephropathy Nervous system disorder  
 Nervousness Neutropenia Night sweats Nightmare Nipple pain  
 Nocturnal dyspnoea Obstruction Oedema Oedema peripheral  
 Oesophageal spasm Onychomycosis Oral candidiasis Oral  
 pruritus Organ failure Orthopnoea Orthostatic hypotension  
 Osteoarthritis Osteochondrosis Otitis media Ovarian



cyst Oxygen saturation decreased Pain Pain in extremity Pain in jaw  
 Pallor Palmar erythema Palpitations Pancreatic  
 pseudocyst Pancreatitis acute Pancytopenia Panic attack  
 Panic reaction Papilloma Paraesthesia Paraesthesia oral  
 Paralysis Paronychia Partial seizures Peptic ulcer  
 Pericardial effusion Peripheral ischaemia Petechiae  
 Photophobia Pleural disorder Pleural effusion Pleurisy  
 Pleuritic pain Pneumonia Pneumonia aspiration  
 Pneumothorax Pollakiuria Polyarthritits Polydipsia Polyp  
 Post thrombotic syndrome Pregnancy test positive  
 Presyncope Proctalgia Protein urine present Proteinuria  
 Prothrombin level increased Pruritus Pruritus generalised  
 Pruritus genital Pseudocyst Psoriasis Pulmonary arterial  
 hypertension Pulmonary embolism Pulmonary function test  
 decreased Pulmonary oedema Rash Rash macular Rash papular  
 Rash pustular Rectal haemorrhage Red blood cell count  
 decreased Renal failure Renal impairment Respiratory depression  
 Respiratory failure Respiratory tract infection Restless  
 legs syndrome Retching Retinal detachment Retinal disorder  
 Retinal tear Rhinitis Right ventricular failure  
 Rosacea Sciatica Sensation of foreign body Sensation  
 of heaviness Shock Sicca syndrome Sinus bradycardia Sinus  
 congestion Sinus headache Sinus operation Sinusitis Skin  
 discolouration Skin disorder Skin exfoliation Skin  
 hyperpigmentation Skin irritation Skin lesion Skin necrosis Skin  
 papilloma Skin ulcer Sleep disorder Sneezing Social avoidant  
 behaviour Somnolence Sputum purulent Stomatitis Subarachnoid  
 haemorrhage Subcutaneous abscess Supraventricular extrasystoles  
 Supraventricular tachycardia Syncope Systemic lupus  
 erythematosus Tachycardia Tachypnoea Tenderness Tendonitis  
 Tension Testicular pain Thinking abnormal Thirst  
 Throat irritation Thrombocytopenia Thrombophlebitis superficial  
 Tinnitus Tongue blistering Tongue discolouration Tongue  
 disorder Tongue ulceration Tooth abscess Tooth impacted  
 Toothache Tracheobronchitis Tremor Tubulointerstitial  
 nephritis Ulcer Upper respiratory tract infection Urethral disorder  
 Urinary tract disorder Urinary tract infection Urine  
 colour abnormal Urosepsis Urticaria Uterine leiomyoma  
 Uterovaginal prolapse VIIth nerve paralysis Vaginal  
 haemorrhage Vaginal infection Vaginal prolapse Venous insufficiency  
 Venous pressure jugular Venous pressure jugular increased  
 Venous thrombosis Ventricular arrhythmia Ventricular  
 extrasystoles Ventricular failure Ventricular tachycardia  
 Vertigo Viral diarrhoea Viral infection Vision blurred  
 Visual impairment Vitreous floaters Vomiting Weight decreased  
 Weight fluctuation Weight increased Wheezing White blood  
 cell count decreased Xerophthalmia

\*\*\*\*\*  
 \*\*\*\*\*

Alpha-1D adrenergic receptor - Group: Receptor

Treated with:

dapiprazole: approved small molecule (0 associated side  
 effects) Used in the treatment of iatrogenically induced mydriasis  
 produced by adrenergic (phenylephrine) or parasympatholytic  
 (tropicamide) agents used in certain eye examinations.

amitriptyline: approved small molecule (109 associated side effects) For the treatment of depression, chronic pain, irritable bowel syndrome, sleep disorders, diabetic neuropathy, agitation and insomnia, and migraine prophylaxis.

alfuzosin: approved small molecule (92 associated side effects)

For the reduction of urinary obstruction and relief of associated manifestations (eg. sensation of incomplete bladder emptying or straining, urgency, interrupted or weak stream) in patients with symptomatic benign prostatic hyperplasia.

norepinephrine: approved small molecule (22 associated side effects) Mainly used to treat patients in vasodilatory shock states such as septic shock and neurogenic shock and has shown a survival benefit over dopamine. Also used as a vasopressor medication for patients with critical hypotension.

promazine: approved small molecule (0 associated side effects)

Used as an adjunct for short term treatment of moderate and severe psychomotor agitation. Also used to treat agitation or restlessness in the elderly.

prazosin: approved small molecule (93 associated side effects)

For treatment of hypertension, symptomatic benign prostatic hyperplasia, and severe congestive heart failure. May also be used alone or in combination with  $\beta$ -blockers in the preoperative management of signs and symptoms of pheochromocytoma.

imipramine: approved small molecule (100 associated side effects) For the relief of symptoms of depression and as temporary adjunctive therapy in reducing enuresis in children aged 6 years and older. May also be used to manage panic disorders, with or without agoraphobia, as a second line agent in ADHD, management of eating disorders, for short-term management of acute depressive episodes in bipolar disorder and schizophrenia, and for symptomatic treatment of postherpetic neuralgia.

nortriptyline: approved small molecule (91 associated side effects) For the treatment of depression, chronic pain, irritable bowel syndrome, sleep disorders, diabetic neuropathy, agitation and insomnia, and migraine prophylaxis.

doxazosin: approved small molecule (243 associated side effects) For treatment and management of mild to moderate hypertension and urinary obstruction symptoms caused by BPH.

nicardipine: approved small molecule (107 associated side effects) Used for the management of patients with chronic stable angina and for the treatment of hypertension.

ergotamine: approved small molecule (15 associated side effects)

For use as therapy to abort or prevent vascular headache, e.g., migraine, migraine variants, or so called "histaminic cephalalgia".

tamsulosin: approved small molecule (79 associated side effects)

Used in the treatment of signs and symptoms of benign prostatic hyperplasia (reduction in urinary obstruction and relief of associated manifestations such as hesitancy, terminal dribbling of urine, interrupted or weak stream...etc.)

propiomazine: approved small molecule (0 associated side effects) Propiomazine is largely used for its antihistaminic sleep inducing effects in treating insomnia.

doxepin: approved small molecule (210 associated side effects) Labeled indications: depression and insomnia. Unlabeled

indications: chronic and neuropathic pain, anxiety, idiopathic urticaria.

terazosin: approved small molecule (115 associated side effects) For the treatment of symptomatic BPH and mild to moderate hypertension.

pergolide: approved,withdrawn small molecule (354 associated side effects) Indicated as adjunctive treatment to levodopa/carbidopa in the management of the signs and symptoms of Parkinson's disease. It was withdrawn from the US and Canadian markets in 2007 due to an increased risk of cardiac valvulopathy.

bromocriptine: approved small molecule (120 associated side effects) For the treatment of galactorrhea due to hyperprolactinemia, prolactin-dependent menstrual disorders and infertility, prolactin-secreting adenomas, prolactin-dependent male hypogonadism, as adjunct therapy to surgery or radiotherapy for acromegaly or as monotherapy in special cases, as monotherapy in early Parkinsonian Syndrome or as an adjunct with levodopa in advanced cases with motor complications. Bromocriptine has also been used off-label to treat restless legs syndrome and neuroleptic malignant syndrome.

quetiapine: approved small molecule (359 associated side effects) For the treatment of schizophrenia and related psychotic disorders.

methotrimeprazine: approved small molecule (0 associated side effects) For the treatment of psychosis, particular those of schizophrenia, and manic phases of bipolar disorder.

sertindole: approved,withdrawn small molecule (0 associated side effects) Used in the treatment of schizophrenia.

droxidopa: approved small molecule (0 associated side effects) For treatment of neurogenic orthostatic hypotension (NOH) associated with various disorders including Multiple System Atrophy, Familial Amyloid Polyneuropathy, hemodialysis induced hypotension and Parkinson's Disease. Also investigated for use/treatment in neurologic disorders, nephropathy, blood (blood forming organ disorders, unspecified), and dizzy/fainting spells.

xylometazoline: approved small molecule (0 associated side effects) It is used for treating nasal congestion and minor inflammation due to allergies or colds.

720 known side effects mediated through drugs targeting this protein:

Abdominal discomfort Abdominal distension Abdominal pain  
 Abdominal pain upper Abnormal dreams Abscess  
 Accommodation disorder Acidosis Acne Acute abdomen Acute  
 coronary syndrome Acute lymphocytic leukaemia Adenocarcinoma  
 Adenoma benign Adjustment disorder Affect lability  
 Ageusia Aggression Agitation Agranulocytosis Akathisia  
 Akinesia Alanine aminotransferase increased Albright's  
 disease Alcohol intolerance Alopecia Amblyopia Amenorrhoea  
 Amnesia Anaemia Anaemia megaloblastic Anaphylactic  
 shock Aneurysm Angina pectoris Angioedema Angiopathy Anorectal  
 discomfort Anoxia Antinuclear antibody positive Anxiety  
 Aortic dissection Apathy Aphasia Aphthous stomatitis  
 Aplastic anaemia Apnoea Application site reaction  
 Arrhythmia Arterial disorder Arteriosclerosis Arthralgia

Arthritis Arthropathy Aspartate aminotransferase increased  
 Asthenia Asthma Ataxia Atrial fibrillation  
 Atrioventricular block Atrioventricular block first degree  
 Atrophy Back pain Balance disorder Benign neoplasm  
 Benign neoplasm of skin Bladder cancer Bladder pain  
 Blepharitis Blepharospasm Blindness Blister Blood  
 alkaline phosphatase increased Blood cholesterol increased Blood  
 creatinine increased Blood glucose increased Blood pressure  
 diastolic decreased Blood pressure fluctuation Blood pressure  
 increased Blood pressure systolic decreased Blood uric acid  
 increased Body temperature decreased Body temperature increased  
 Bone pain Bone sarcoma Bradycardia Brain oedema  
 Breast cancer Breast cyst Breast disorder Breast  
 engorgement Breast enlargement Breast feeding Breast neoplasm  
 Breast pain Bronchitis Bronchospasm Bruxism  
 Buccoglossal syndrome Bundle branch block Bursitis  
 Cachexia Calculus urinary Candidiasis Cardiac arrest  
 Cardiac disorder Cardiac failure Cardiac failure congestive  
 Cardiac fibrillation Cardiac valve disease Cardiomyopathy  
 Cardiovascular disorder Cataract Catatonia Cellulitis  
 Cerebral haemorrhage Cerebral ischaemia Cerebrospinal  
 fluid rhinorrhoea Cerebrovascular accident Cerebrovascular  
 disorder Cervix carcinoma Chest pain Chills Cholecystitis  
 Cholelithiasis Cholestasis Choreoathetosis Cogwheel rigidity  
 Cold sweat Colitis Coma Completed suicide Confusional state  
 Congenital eye disorder Conjunctivitis Connective tissue  
 disorder Constipation Convulsion Coordination abnormal  
 Coronary artery disease Cough Crocodile tears syndrome  
 Cyanosis Cystitis Cystitis noninfective Cytolytic  
 hepatitis Deafness Death Decreased appetite Deep vein  
 thrombosis Deficiency anaemia Dehydration Delirium Delusion  
 Dental caries Dependence Depersonalisation Depressed level  
 of consciousness Dermatitis atopic Dermatitis bullous Dermatitis  
 contact Dermatitis exfoliative Diabetes mellitus Diabetic coma  
 Diabetic hyperglycaemic coma Diabetic ketoacidosis Diarrhoea  
 Diplopia Discomfort Disease progression Disorientation  
 Disseminated intravascular coagulation Dissociation  
 Disturbance in attention Disturbance in sexual arousal  
 Diverticulitis Dizziness Dizziness postural Drooling  
 Drug abuse Drug dependence Drug hypersensitivity Drug  
 interaction Dry eye Dry mouth Dry skin Dry throat Duodenitis  
 Dysarthria Dysgeusia Dyskinesia Dysmenorrhoea Dyspepsia  
 Dysphagia Dysphemia Dysphonia Dyspnoea Dystonia  
 Dysuria Ear disorder Ear infection Ear pain  
 Ecchymosis Eclampsia Eczema Effusion Ejaculation  
 delayed Ejaculation disorder Ejaculation failure Elastosis  
 perforans Elderly Electrocardiogram QRS complex  
 Electrocardiogram QT prolonged Electrocardiogram ST segment  
 Electrocardiogram ST segment depression Electrocardiogram ST  
 segment elevation Electrocardiogram T wave inversion Electrocardiogram  
 abnormal Electrocardiogram change Electrolyte imbalance  
 Elevated mood Embolism Emphysema Encephalopathy  
 Endocrine disorder Enuresis Eosinophilia  
 Epididymitis Epistaxis Erectile dysfunction Eructation  
 Erythema Erythema multiforme Erythromelalgia Euphoric

mood Extrapyrarnidal disorder Extrasystoles Extravasation  
 Eye disorder Eye haemorrhage Eye infection Eye pain  
 Face oedema Faecal incontinence Fasting Fatigue Fear  
 Feeling abnormal Feeling cold Fibrocystic breast disease  
 Fibrosis Flat affect Flatulence Floppy iris syndrome  
 Flushing Foetor hepaticus Folliculitis Fungal infection  
 Fungal skin infection Gait disturbance Galactorrhoea  
 Gamma-glutamyltransferase increased Gangrene Gastric  
 disorder Gastric ulcer Gastritis Gastroenteritis  
 Gastrointestinal disorder Gastrointestinal haemorrhage  
 Gastrointestinal pain Gastrointestinal tract irritation  
 Gastrooesophageal reflux disease Genital discharge Gestational  
 hypertension Gingival bleeding Gingival recession Gingivitis  
 Glaucoma Glossitis Glycosuria Gout Gynaecomastia  
 Haematemesis Haematochezia Haematocrit decreased  
 Haematoma Haematuria Haemoglobin Haemoglobin decreased  
 Haemoglobinuria Haemolysis Haemoptysis Haemorrhage Haemorrhage  
 intracranial Haemorrhoids Haemothorax Hallucination  
 Hallucination, visual Headache Hearing impaired Heart rate  
 irregular Hemiplegia Hepatic enzyme increased Hepatic failure  
 Hepatic function abnormal Hepatic necrosis Hepatitis  
 Hepatitis cholestatic Hepatobiliary disease Hepatocellular  
 injury Hepatomegaly Hernia Herpes simplex Herpes  
 virus infection Herpes zoster Hiccups Hirsutism Hormone  
 level abnormal Hostility Hot flush Hyperaemia  
 Hyperbilirubinaemia Hypercholesterolaemia Hyperglycaemia  
 Hyperhidrosis Hyperkalaemia Hyperkinesia  
 Hyperlipidaemia Hypermagnesaemia Hyperpyrexia  
 Hypersensitivity Hypersomnia Hypertension Hyperthyroidism  
 Hypertonia Hypertrophy Hyperuricaemia Hyperuricosuria  
 Hyperventilation Hypoaesthesia Hypoaesthesia oral  
 Hypochromic anaemia Hypoglycaemia Hypogonadism  
 Hypokalaemia Hypokinesia Hypomania Hyponatraemia  
 Hypophosphataemia Hypotension Hypothermia Hypothyroidism  
 Hypotonia Hypoventilation Hypovolaemia Hypoxia Ileus  
 paralytic Ill-defined disorder Immune system disorder  
 Inappropriate antidiuretic hormone secretion Incontinence  
 Increased appetite Infarction Infection Infestation  
 Influenza Influenza like illness Injection site pain  
 Injection site reaction Insomnia Intermittent  
 claudication Interstitial lung disease Intervertebral disc  
 disorder Intestinal obstruction Intracranial pressure increased  
 Intraocular pressure increased Iron deficiency Iron  
 deficiency anaemia Irritability Ischaemia Jaundice Joint  
 range of motion decreased Ketoacidosis Laboratory test  
 abnormal Lacrimation decreased Lacrimation increased Lactic  
 acidosis Laryngeal disorder Laryngeal oedema Laryngitis  
 Laryngospasm Lethargy Leukaemia Leukocytosis  
 Leukopenia Libido decreased Libido increased Lichen planus  
 Lichenoid keratosis Lip blister Lip dry Liver disorder  
 Liver function test abnormal Liver injury Local reaction  
 Localised oedema Loss of consciousness Lower respiratory  
 tract infection Lung adenocarcinoma stage I Lung disorder Lung  
 infiltration Lung neoplasm malignant Lymphadenitis  
 Lymphadenopathy Lymphocytosis Malaise Malignant

melanoma    Mania    Mediastinal disorder    Melaena    Meningitis  
           Menopausal symptoms    Menopause    Menorrhagia    Mental disability  
           Mental disorder    Mental retardation    Mental status changes  
           Metrorrhagia    Micturition disorder    Migraine    Miosis  
           Mood swings    Motion sickness    Mouth ulceration    Movement disorder  
           Muscle atrophy    Muscle contractions involuntary    Muscle  
 relaxant therapy    Muscle rigidity    Muscle spasms    Muscle twitching  
           Muscular weakness    Musculoskeletal discomfort    Musculoskeletal  
 pain    Musculoskeletal stiffness    Myalgia    Mydriasis    Myelitis  
           Myocardial infarction    Myocardial ischaemia    Myocarditis  
           Myoclonus    Myopia    Myositis    Nail disorder    Narcolepsy  
           Nasal congestion    Nasal disorder    Nasal obstruction  
           Nasopharyngitis    Nausea    Neck pain    Necrosis    Neoplasm  
           Neoplasm malignant    Neoplasm recurrence    Nephrolithiasis  
           Nephrotic syndrome    Nervous system disorder    Nervousness  
           Neuralgia    Neuritis    Neuroleptic malignant syndrome  
           Neurological symptom    Neuropathy peripheral    Neurosis  
           Neutropenia    Neutrophil count decreased    Night sweats  
           Nightmare    Nocturia    Nodule    Nuchal rigidity    Obstruction  
           Ocular hyperaemia    Oedema    Oedema peripheral    Oesophageal  
 disorder    Oesophageal ulcer    Oesophagitis    Oliguria  
           Onychomycosis    Orchitis noninfective    Oropharyngeal  
 discomfort    Oropharyngeal pain    Orthostatic hypotension  
           Osteoarthritis    Osteomyelitis    Osteoporosis    Otitis  
 media    Pain    Pain in extremity    Pain in jaw    Pain of skin    Pallor  
           Palpitations    Pancreatitis    Pancytopenia    Panic  
 reaction    Paraesthesia    Paralysis    Paranoia    Paresis  
           Parkinsonian gait    Parkinsonism    Parosmia    Parotid gland  
 enlargement    Pathological fracture    Pathological gambling    Pelvic pain  
           Peptic ulcer    Pericardial effusion    Pericardial  
 haemorrhage    Pericarditis    Pericarditis constrictive    Perineal  
 pain    Peripheral coldness    Peripheral ischaemia    Peripheral  
 vascular disorder    Personality disorder    Petechiae    Pharyngeal  
 disorder    Pharyngitis    Photophobia    Photosensitivity reaction  
           Platelet count decreased    Pleural disorder    Pleural effusion  
           Pleural fibrosis    Pneumonia    Pneumothorax    Poisoning  
           Pollakiuria    Polycythaemia    Polymyalgia rheumatica    Polyp  
           Polyuria    Pre-eclampsia    Pregnancy    Presyncope    Priapism  
           Proctalgia    Prolactinoma    Prostatic disorder    Protrusion  
 tongue    Pruritus    Pruritus genital    Psoriasis    Psychotic  
 disorder    Pulmonary embolism    Pulmonary fibrosis    Pulmonary  
 hypertension    Pulmonary oedema    Pulse absent    Purpura  
           Pyelonephritis    Pyuria    Rales    Rash    Rash erythematous    Rash  
 maculo-papular    Rash papular    Rash pustular    Raynaud's  
 phenomenon    Rectal haemorrhage    Rectal tenesmus    Regressive  
 behaviour    Renal failure    Renal failure acute    Renal impairment  
           Renal pain    Respiratory disorder    Respiratory failure  
           Respiratory tract infection    Restless legs syndrome    Retinal  
 detachment    Retinal disorder    Retinal vascular disorder    Retrograde  
 ejaculation    Retroperitoneal fibrosis    Rhabdomyolysis    Rhinitis  
           Rhinitis seasonal    Rhinorrhoea    Rosacea    Salivary gland  
 enlargement    Salivary hypersecretion    Salpingitis    Sarcoma  
           Sciatica    Scleral disorder    Scotoma    Seasonal allergy  
           Seborrhoeic dermatitis    Sedation    Semen analysis abnormal  
           Sensation of heaviness    Sensory loss    Sepsis    Sexual

dysfunction Shock Sialoadenitis Sinus arrhythmia Sinus congestion  
Sinus disorder Sinus headache Sinusitis Skin cancer Skin  
discolouration Skin disorder Skin exfoliation Skin hypertrophy  
Skin irritation Skin mass Skin ulcer Sleep disorder Sleep  
paralysis Sluggishness Social avoidant behaviour  
Somnambulism Somnolence Speech disorder Splenomegaly  
Status epilepticus Stevens-Johnson syndrome Stomatitis  
Stupor Subarachnoid haemorrhage Subcutaneous nodule  
Subdural haematoma Sudden death Suicidal ideation  
Suicide attempt Superior sagittal sinus thrombosis  
Supraventricular tachycardia Swelling Syncope Systemic  
lupus erythematosus Tachycardia Tardive dyskinesia Tenderness  
Tendon disorder Tenosynovitis Tension Teratogenicity  
Testicular swelling Thinking abnormal Thirst Thought  
blocking Throat tightness Thrombocytopenia Thrombocytosis  
Thrombophlebitis Thrombosis Thyroid adenoma Tinnitus  
Tongue discolouration Tongue disorder Tongue oedema Tooth  
abscess Tooth disorder Tooth hypoplasia Tooth infection  
Toothache Torsade de pointes Torticollis Transaminases  
increased Tremor Ulcer Upper respiratory tract infection  
Urethral disorder Urethral pain Urinary incontinence  
Urinary retention Urinary tract disorder Urinary tract  
infection Urine abnormality Urine analysis abnormal Urine  
output increased Urticaria Uterine haemorrhage VIIth nerve  
paralysis Vaginal haemorrhage Vaginal infection Vaginal  
inflammation Varicose vein Vascular purpura Vasculitis  
Vasoconstriction Vasodilation procedure Vasospasm Ventricular  
extrasystoles Ventricular tachycardia Vertigo Viral  
diarrhoea Viral infection Vision blurred Visual acuity reduced  
Visual impairment Vomiting Vulvovaginal candidiasis  
Vulvovaginal mycotic infection Vulvovaginitis Water  
intoxication Weight decreased Weight increased Wheezing White  
blood cell count decreased Withdrawal bleed Yawning

\*\*\*\*\*  
\*\*\*\*\*

Nuclear receptor coactivator 1 - Group: Other

Treated with:

genistein: experimental small molecule (0 associated side effects)

(11-beta)-11,21-dihydroxy-pregn-4-ene-3,20-dione: experimental small molecule (0 associated side effects)

2-(3-fluoro-4-hydroxyphenyl)-7-vinyl-1,3-benzoxazol-5-ol: experimental small molecule (0 associated side effects)

3-(3-fluoro-4-hydroxyphenyl)-7-hydroxy-1-naphthonitrile: experimental small molecule (0 associated side effects)

(2s)-3-(1-{[2-(2-chlorophenyl)-5-methyl-1,3-oxazol-4-yl]methyl}-1h-indol-5-yl)-2-ethoxypropanoic acid: experimental small molecule (0 associated side effects)

[5-hydroxy-2-(4-hydroxyphenyl)-1-benzofuran-7-yl]acetonitrile: experimental small molecule (0 associated side effects)

2-(5-hydroxy-naphthalen-1-yl)-1,3-benzooxazol-6-ol: experimental small molecule (0 associated side effects)

n-(2,2,2-trifluoroethyl)-n-{4-[2,2,2-trifluoro-1-hydroxy-1-(trifluoromethyl)ethyl]phenyl}benzenesulfonamide: experimental small molecule (0 associated side effects)

1-chloro-6-(4-hydroxyphenyl)-2-naphthol: experimental small molecule (0 associated side effects)

4-(4-hydroxyphenyl)-1-naphthaldehyde oxime: experimental small molecule (0 associated side effects)

5-hydroxy-2-(4-hydroxyphenyl)-1-benzofuran-7-carbonitrile: experimental small molecule (0 associated side effects)

2-methyl-2-(4-[(4-methyl-2-[4-(trifluoromethyl)phenyl]-1,3-thiazol-5-yl)carbonyl]amino)methylphenoxy)propanoic acid: experimental small molecule (0 associated side effects)

3-bromo-6-hydroxy-2-(4-hydroxyphenyl)-1h-inden-1-one: experimental small molecule (0 associated side effects)

3-(6-hydroxy-naphthalen-2-yl)-benzo[d]isooxazol-6-ol: experimental small molecule (0 associated side effects)

(1r,3r)-5-[(2e)-3-[(1s,3r)-2,2,3-trimethyl-3-[6,6,6-trifluoro-5-hydroxy-5-(trifluoromethyl)hex-3-yn-1-yl]cyclopentyl]prop-2-en-1-ylidene]cyclohexane-1,3-diol: experimental small molecule (0 associated side effects)

(5beta)-pregnane-3,20-dione: experimental small molecule (0 associated side effects)

3-{5-methoxy-1-[(4-methoxyphenyl)sulfonyl]-1h-indol-3-yl}propanoic acid: experimental small molecule (0 associated side effects)

(8alpha,10alpha,13alpha,17beta)-17-[(4-hydroxyphenyl)carbonyl]androsta-3,5-diene-3-carboxylic acid: experimental small molecule (0 associated side effects)

myristic acid: experimental small molecule (0 associated side effects)

(2s)-2-methoxy-3-{4-[2-(5-methyl-2-phenyl-1,3-oxazol-4-yl)ethoxy]-1-benzothiophen-7-yl}propanoic acid: experimental small molecule (0 associated side effects)

1,3-cyclohexanediol, 4-methylene-5-[(2e)-[(1s,3as,7as)-octahydro-1-(5-hydroxy-5-methyl-1,3-hexadiynyl)-7a-methyl-4h-inden-4-ylidene]ethylidene]-, (1r,3s,5z): experimental small molecule (0 associated side effects)

known side effects mediated through drugs targeting this protein:

\*\*\*\*\*  
\*\*\*\*\*

Mitochondrial ornithine transporter 2 - Group: Transporter

Treated with:

l-ornithine: approved, nutraceutical small molecule (0 associated side effects) Used for nutritional supplementation, also for treating dietary shortage or imbalance. It has been claimed that ornithine improves athletic performance, has anabolic effects, has wound-healing effects, and is immuno-enhancing.

known side effects mediated through drugs targeting this protein:

\*\*\*\*\*  
\*\*\*\*\*

Sodium channel protein type 3 subunit alpha - Group: Channel

Treated with:

zonisamide: approved small molecule (190 associated side effects) For use as adjunctive treatment of partial seizures in adults with epilepsy.



190 known side effects mediated through drugs targeting this protein:

Abdominal pain Abnormal dreams Acne Agitation Alanine  
aminotransferase increased Albuminuria Alopecia Amblyopia  
Amenorrhoea Anaemia Anxiety Apnoea Arthralgia  
Arthritis Aspartate aminotransferase increased Asthenia  
Ataxia Atrial fibrillation Bladder pain Blood  
lactate dehydrogenase increased Bradycardia Calculus bladder  
Cardiac failure Cardiac fibrillation Cerebrovascular  
accident Chest pain Cholangitis Cholecystitis Cholelithiasis  
Cognitive disorder Colitis Confusional state  
Conjunctivitis Constipation Convulsion Coordination  
abnormal Cough Deafness Decreased appetite Dehydration  
Depressed level of consciousness Dermatitis Dermatitis  
bullous Diarrhoea Diplopia Discomfort Disturbance in sexual  
arousal Dizziness Dry mouth Dry skin Duodenal ulcer  
Duodenitis Dysarthria Dysgeusia Dyskinesia Dyspepsia  
Dysphagia Dyspnoea Dystonia Dysuria Ecchymosis  
Eczema Embolism Encephalopathy Enuresis Erectile  
dysfunction Euphoric mood Extrasystoles Face oedema Faecal  
incontinence Fatigue Feeling abnormal Flank pain Flatulence  
Gait disturbance Gastritis Gastroenteritis Gastrointestinal  
pain Gingival bleeding Gingival hyperplasia Gingivitis Glaucoma  
Glossitis Gynaecomastia Haematemesis Haematuria  
Haemoglobin Haemoptysis Haemorrhage Headache Hirsutism  
Hyperaesthesia Hyperhidrosis Hyperkinesia Hyperplasia  
Hyperreflexia Hypersensitivity Hypertension Hypertonia  
Hypoglycaemia Hypokinesia Hyponatraemia Hypotension  
Hypotonia Ill-defined disorder Immunodeficiency  
Incontinence Influenza Insomnia Iritis  
Irritability Jaundice Jaundice cholestatic Leukopenia  
Libido decreased Loss of consciousness Lymphadenopathy  
Malaise Mastitis Melaena Menorrhagia Microcytic  
anaemia Micturition urgency Mouth ulceration Movement disorder  
Muscle relaxant therapy Muscle rigidity Muscle spasms  
Muscle twitching Muscular weakness Musculoskeletal discomfort  
Musculoskeletal stiffness Myalgia Myoclonus Nausea  
Nervousness Neuritis Neuropathy peripheral Nocturia  
Nuchal rigidity Nystagmus Oculogyric crisis Oedema  
Oedema peripheral Oesophagitis Osteoarthritis Pain  
Palpitations Paraesthesia oral Paralysis Parosmia  
Petechiae Pharyngitis Photophobia Pollakiuria Polyuria  
Pruritus Psychotic disorder Pulmonary embolism Rash  
Rash maculo-papular Rash pustular Rectal haemorrhage  
Rhinitis Scotoma Shock Somnolence Speech disorder  
Stomatitis Syncope Systemic lupus erythematosus Tachycardia  
Tension Thirst Thrombocytopenia Thrombophlebitis  
Tinnitus Tremor Ulcer Urinary incontinence Urinary  
retention Urine output increased Urticaria VIIIth nerve paralysis  
Vascular insufficiency Ventricular extrasystoles Vertigo  
Vomiting Weight decreased Weight increased

\*\*\*\*\*  
\*\*\*\*\*

Potassium voltage-gated channel subfamily H member 7 - Group:  
Channel

Treated with:

ibutilide: approved small molecule (53 associated side effects)

Indicated for the rapid conversion of atrial fibrillation or atrial flutter of recent onset to sinus rhythm.

prazosin: approved small molecule (93 associated side effects)

For treatment of hypertension, symptomatic benign prostatic hyperplasia, and severe congestive heart failure. May also be used alone or in combination with  $\beta$ -blockers in the preoperative management of signs and symptoms of pheochromocytoma.

doxazosin: approved small molecule (243 associated side effects) For treatment and management of mild to moderate hypertension and urinary obstruction symptoms caused by BPH.

miconazole: approved small molecule (33 associated side effects)

For topical application in the treatment of tinea pedis (athlete's foot), tinea cruris, and tinea corporis caused by *Trichophyton rubrum*, *Trichophyton mentagrophytes*, and *Epidermophyton floccosum*, in the treatment of cutaneous candidiasis (moniliasis), and in the treatment of tinea versicolor.

terazosin: approved small molecule (115 associated side effects) For the treatment of symptomatic BPH and mild to moderate hypertension.

311 known side effects mediated through drugs targeting this protein:

Abdominal discomfort Abdominal distension Abdominal pain  
Abnormal dreams Acute coronary syndrome Affect lability  
Agitation Alopecia Amblyopia Amnesia Anaphylactic  
shock Anaphylactoid reaction Aneurysm Angina pectoris Angioedema  
Anorectal discomfort Anoxia Antinuclear antibody  
positive Anxiety Apathy Arrhythmia Arthralgia Arthritis  
Arthropathy Asthenia Asthma Ataxia Atrial  
fibrillation Atrioventricular block first degree  
Atrioventricular block second degree Back pain Bladder  
pain Blindness Blood creatine phosphokinase increased Blood  
creatinine increased Blood urea increased Blood uric acid  
increased Body temperature increased Bradycardia Breast disorder  
Breast neoplasm Breast pain Bronchitis Bronchospasm  
Bundle branch block Burning sensation Cardiac arrest  
Cardiac disorder Cardiac failure Cardiac failure congestive  
Cardiac fibrillation Cataract Cerebrovascular accident  
Cerebrovascular disorder Chest pain Chills  
Cholelithiasis Cholestasis Confusional state Congenital eye  
disorder Conjunctivitis Constipation Convulsion  
Coordination abnormal Cough Crocodile tears syndrome  
Cystitis Cystitis noninfective Deafness Death Decreased  
appetite Dehydration Depersonalisation Dermatitis Dermatitis  
contact Diarrhoea Diplopia Discomfort Disturbance in  
attention Disturbance in sexual arousal Diverticulitis  
Dizziness Dizziness postural Dry mouth Dry skin  
Dysgeusia Dyskinesia Dyspepsia Dysphagia Dyspnoea  
Dysuria Ear infection Ear pain Eczema Ejaculation  
failure Electrocardiogram abnormal Encephalopathy

Epididymitis Epistaxis Erectile dysfunction Erythema  
 Extrasystoles Eye disorder Eye pain Face oedema  
 Faecal incontinence Fatigue Feeling abnormal Flat affect  
 Flatulence Floppy iris syndrome Flushing Fungal infection  
 Gastric ulcer Gastritis Gastroenteritis Gastrointestinal  
 haemorrhage Gastrointestinal pain Gastrointestinal tract irritation  
 Genital burning sensation Genital dischargeGingivitis Gout  
 Gynaecomastia Haematocrit decreased Haematuria Haemoglobin  
 decreased HaemorrhageHallucination Headache Hepatic function  
 abnormal Hepatitis cholestatic Hernia Herpes simplex  
 Herpes virus infection Herpes zoster Hot flush  
 Hyperglycaemia Hyperhidrosis Hypersensitivity  
 Hypertension Hypertonia HypertrophyHyperuricaemia  
 Hypoaesthesia Hypokalaemia Hypokinesia Hypophosphataemia  
 Hypotension Hypotonia Ill-defined disorder Immune system  
 disorder Incontinence Increased appetite Infarction  
 Infection Influenza Influenza like illness Insomnia  
 Intermittent claudication Ischaemia Jaundice Lacrimation  
 increased Laryngospasm Leukocytosis Leukopenia Libido  
 decreased Lichen planus Liver function test abnormal Loss of  
 consciousness Lung neoplasm malignant Lymphadenopathy  
 Malaise Melaena Menopausal symptoms Menopause  
 Mental disabilityMental disorder Micturition disorder  
 Migraine Miosis Mood swings Movement disorderMuscle  
 spasms Muscle twitching Muscular weaknessMusculoskeletal  
 discomfort Musculoskeletal pain Myalgia Myocardial infarction  
 Myocardial ischaemia Myopia Nail disorder Narcolepsy  
 Nasal congestion Nasopharyngitis Nausea Neck pain  
 Neoplasm Neoplasm malignant Nephrolithiasis Nervous  
 system disorder Nervousness Neutropenia Nightmare Nodal arrhythmia  
 Oedema Oedema peripheralOesophagitis Oliguria  
 Orthostatic hypotension Osteoarthritis Otitis media  
 Pain Pain of skin Pallor Palpitations  
 Pancreatitis Paraesthesia Paresis Parosmia  
 Pelvic painPerineal pain Peripheral ischaemia Pharyngitis  
 Photophobia Photosensitivity reaction Platelet disorder  
 Pneumonia Pollakiuria Polymyalgia rheumatica Polyuria  
 Priapism Proctalgia Prostatic disorder Pruritus  
 Pruritus genital Psoriasis Purpura Rash erythematousRash  
 maculo-papular Rash papular Rectal haemorrhage Rectal  
 tenesmus Renal failure Renal pain Respiratory disorder  
 Respiratory tract infection Retinal disorder Retrograde  
 ejaculation Rhinitis Rhythm idioventricular Scleral disorder  
 Scotoma Seborrhoeic dermatitis Semen analysis abnormal  
 Sepsis Sexual dysfunction Shock Sinus bradycardiaSinus  
 tachycardia Sinusitis Skin disorder Skin hypertrophy Somnolence  
 Speech disorder Subarachnoid haemorrhage Sudden death  
 Supraventricular extrasystoles Supraventricular tachycardia  
 Syncope Tachyarrhythmia Tachycardia Tendon disorder  
 Tension Thinking abnormalThirst Thrombocytopenia  
 Tinnitus Tongue disorder Tooth disorder Tooth hypoplasia  
 Tremor Ulcer Upper respiratory tract infection Urethral  
 disorder Urinary incontinence Urinary retentionUrinary tract  
 disorder Urinary tract infection Urine abnormalityUrine  
 analysis abnormalUrine output increased Urticaria Vaginal discharge

Vascular purpura Vasculitis Vasodilation procedure Ventricular  
arrhythmia Ventricular extrasystoles Ventricular tachycardia  
Vertigo Viral infection Vision blurred Visual acuity  
reduced Visual impairment Vomiting Vulvovaginal discomfort  
Vulvovaginal erythema Weight decreased Weight increased

\*\*\*\*\*  
\*\*\*\*\*

Histamine H2 receptor - Group: Receptor

Treated with:

betazole: approved small molecule (0 associated side effects)

For use clinically to test gastric secretory function.

cimetidine: approved small molecule (50 associated side effects)

For the treatment and the management of acid-reflux disorders (GERD), peptic ulcer disease, heartburn, and acid indigestion.

nizatidine: approved small molecule (74 associated side effects)

For the treatment of acid-reflux disorders (GERD), peptic ulcer disease, active benign gastric ulcer, and active duodenal ulcer.

histamine phosphate: approved small molecule (0 associated side effects) Histamine phosphate is indicated as a diagnostic aid for evaluation of gastric acid secretory function.

epinastine: approved small molecule (12 associated side effects)

For the prevention of itching associated with allergic conjunctivitis.

ranitidine: approved small molecule (79 associated side effects)

Used in the treatment of peptic ulcer disease (PUD), dyspepsia, stress ulcer prophylaxis, and gastroesophageal reflux disease (GERD).

famotidine: approved small molecule (105 associated side effects) For the treatment of peptic ulcer disease (PUD) and gastroesophageal reflux disease (GERD).

methantheline: approved small molecule (0 associated side effects) For the treatment of peptic ulcer disease, irritable bowel syndrome, pancreatitis, gastritis, biliary dyskinesia, pylorospasm, and reflex neurogenic bladder in children.

doxepin: approved small molecule (210 associated side effects) Labeled indications: depression and insomnia. Unlabeled indications: chronic and neuropathic pain, anxiety, idiopathic urticaria.

metiamide: experimental small molecule (0 associated side effects) Potential in the treatment and the management of acid-reflux disorders (GERD), peptic ulcer disease, heartburn, and acid indigestion.

roxatidine acetate: approved small molecule (0 associated side effects) For the treatment of disorders of the upper gastrointestinal region that are due to an excess of hydrochloric acid in the gastric juice, i.e. duodenal ulcers, benign gastric ulcers. Also for prophylaxis of recurrent gastric and duodenal ulcers

305 known side effects mediated through drugs targeting this protein:

Abdominal discomfort Abdominal pain Abnormal dreams Acne  
Adenocarcinoma Adjustment disorder Ageusia Agitation  
Agranulocytosis Alanine aminotransferase increased Alopecia  
Amblyopia Anaemia Anaphylactic shock Angina pectoris

Angioedema Angiopathy Anxiety Aortic dissection Aphthous  
 stomatitis Aplasia Aplastic anaemia Application site reaction  
 Arrhythmia Arthralgia Arthritis Asthenia Asthma  
 Ataxia Atrioventricular block Back pain Benign prostatic  
 hyperplasia Blepharospasm Blister Blood glucose increased  
 Blood pressure increased Blood uric acid increased Body  
 temperature increased Bradycardia Breast cyst Breast disorder  
 Bronchitis Bronchospasm Burning sensation Cardiac arrest  
 Cardiac disorder Cellulitis Cerebrovascular accident Chest  
 pain Chills Cold sweat Completed suicide Confusional state  
 Conjunctival hyperaemia Connective tissue disorder  
 Constipation Convulsion Cough Cyst Cytolytic hepatitis  
 Deafness Death Decreased appetite Delirium Delusion  
 Dependence Dermatitis Dermatitis bullous Dermatitis  
 contact Dermatitis exfoliative Diarrhoea Diplopia Discomfort  
 Disorientation Disturbance in attention Disturbance in  
 sexual arousal Dizziness Drug dependence Dry mouth Dry skin  
 Dry throat Dysgeusia Dyskinesia Dysmenorrhoea Dyspepsia  
 Dyspnoea Dystonia Dysuria Ear pain Eczema  
 Electrocardiogram QRS complex Electrocardiogram QT  
 prolonged Elevated mood Enuresis Eosinophilia Erectile  
 dysfunction Erosive oesophagitis Erythema Erythema multiforme  
 Eustachian tube disorder Extrapyrarnidal disorder  
 Extrasystoles Extravasation Eye disorder Eye  
 infection Eye pain Face oedema Fatigue Feeling abnormal  
 Fibrosis Flatulence Flushing Foetor hepaticus  
 Folliculitis Fungal infection Gait disturbance  
 Galactorrhoea Gastroenteritis Gastrointestinal disorder  
 Gastrointestinal pain Gastrooesophageal reflux disease  
 Gingival recession Gingivitis Glossodynia Gout Grand mal  
 convulsion Gynaecomastia Haematochezia Haematoma Haematuria  
 Haemoglobin Haemoglobinuria Haemolytic anaemia Haemorrhage  
 Hallucination Headache Hearing impaired Hepatic enzyme  
 increased Hepatic failure Hepatic fibrosis Hepatitis  
 Hepatobiliary disease Hepatocellular injury Herpes virus  
 infection Herpes zoster Hot flush Hyperaemia  
 Hyperbilirubinaemia Hyperhidrosis Hyperkalaemia  
 Hypermagnesaemia Hyperpyrexia Hypersensitivity  
 Hypertension Hypertrophy Hyperuricaemia Hypoaesthesia  
 oral Hypokalaemia Hypotension Hypotrichosis Ill-defined  
 disorder Immune system disorder Inappropriate antidiuretic hormone  
 secretion Increased appetite Infection Infestation Influenza  
 Insomnia Interstitial lung disease Irritability  
 Jaundice Jaundice cholestatic Joint range of motion  
 decreased Lacrimation decreased Lacrimation increased Laryngeal  
 oedema Laryngitis Lethargy Leukocytoclastic vasculitis  
 Leukopenia Libido decreased Lip blister Lip dry Liver  
 disorder Liver injury Loss of consciousness Loss of libido  
 Lower respiratory tract infection Lung adenocarcinoma stage I  
 Malaise Malignant melanoma Mania Mediastinal disorder  
 Meningitis Menopausal symptoms Menstrual disorder  
 Mental disability Mental disorder Migraine Motion sickness  
 Movement disorder Muscle spasms Musculoskeletal discomfort  
 Musculoskeletal pain Myalgia Nasal congestion  
 Nasopharyngitis Nausea Neck pain Neoplasm Nephritis

Nephrolithiasis Nervous system disorder Nervousness  
 Neutropenia Neutrophil count decreased Nightmare Nocturia  
 Ocular hyperaemia Oedema Oedema peripheral Onychomycosis  
 Orbital oedema Oropharyngeal pain Pain Pain in extremity  
 Pallor Palpitations Pancreatitis Pancreatitis  
 acute Pancytopenia Paraesthesia Paralysis Pharyngeal  
 disorder Pharyngitis Photosensitivity reaction Pneumonia  
 Pollakiuria Polymyositis Polyp Presyncope Pruritus  
 Psychotic disorder Purpura Rales Rash Renal impairment  
 Renal tubular disorder Respiratory tract infection Rhinitis  
 Rhinorrhoea Rosacea Sedation Sensation of heaviness  
 Sensory loss Serum sickness Shock Sinus congestion Sinus  
 disorder Sinusitis Skin irritation Sleep paralysis Sneezing  
 Somnolence Stevens-Johnson syndrome Stomatitis  
 Strongyloidiasis Supraventricular extrasystoles Swelling  
 Syncope Tachycardia Tardive dyskinesia Tenosynovitis  
 Tension Testicular swelling Thinking abnormal Thirst  
 Thrombocytopenia Thrombocytopenic purpura Thrombocytosis  
 Tinnitus Tooth disorder Tooth infection Toxic epidermal  
 necrolysis Transaminases increased Tremor  
 Tubulointerstitial nephritis Upper respiratory tract infection  
 Urethral disorder Urinary retention Urinary tract disorder  
 Urinary tract infection Urticaria Vascular purpura  
 Vasculitis Ventricular extrasystoles Ventricular  
 tachycardia Vertigo Viral diarrhoea Viral infection Vision  
 blurred Vomiting Weight increased Wheezing White blood cell  
 count decreased

\*\*\*\*\*  
 \*\*\*\*\*

Oligopeptide transporter, kidney isoform - Group: Transporter

Treated with:

ramipril: approved small molecule (147 associated side effects) For the management of mild to severe hypertension. May be used to reduce cardiovascular mortality following myocardial infarction in hemodynamically stable individuals who develop clinical signs of congestive heart failure within a few days following myocardial infarction. To reduce the rate of death, myocardial infarction and stroke in individuals at high risk of cardiovascular events. May be used to slow the progression of renal disease in individuals with hypertension, diabetes mellitus and microalbuminuria or overt nephropathy.

cefmetazole: approved small molecule (0 associated side effects) For the treatment of infections caused by susceptible organisms.

ampicillin: approved small molecule (30 associated side effects)

For treatment of infection (Respiratory, GI, UTI and meningitis) due to E. coli, P. mirabilis, enterococci, Shigella, S. typhosa and other Salmonella, nonpenicillinase-producing N. gonorrhoeae, H. influenzae, staphylococci, streptococci including streptococci

ceftazidime: approved small molecule (71 associated side effects) For the treatment of patients with infections caused by susceptible strains of organisms in the following diseases: lower respiratory tract infections, skin and skin structure infections, urinary tract infections, bacterial septicemia, bone and joint

infections, gynecologic infections, intra abdominal infections (including peritonitis), and central nervous system infections (including meningitis).

loracarbef: approved small molecule (0 associated side effects)

Used to treat upper respiratory tract bacterial infections, chronic bronchitis, pneumonia, sinusitis, pharyngitis and tonsillitis, skin abscesses, urinary tract infections and pyelonephritis caused by *E. coli*, *S. pyogenes*, *S. aureus*, *S. saprophyticus*, *S. pneumoniae*, *H. influenzae* and *M. catarrhalis*.

cefalotin: approved small molecule (0 associated side effects)

Used to prevent infection during surgery and to treat many kinds of infections of the blood, bone or joints, respiratory tract, skin, and urinary tract.

dicloxacillin: approved small molecule (66 associated side effects) Used to treat infections caused by penicillinase-producing staphylococci which have demonstrated susceptibility to the drug.

fosinopril: approved small molecule (155 associated side effects) For treating mild to moderate hypertension, use as an adjunct in treating congestive heart failure, and may be used to slow the rate of progression of renal disease in hypertensive individuals with diabetes mellitus and microalbuminuria or overt nephropathy.

cefotaxime: approved small molecule (55 associated side effects)

Used to treat gonorrhoea, meningitis, and severe infections including infections of the kidney (pyelonephritis) and urinary system. Also used before an operation to prevent infection after surgery.

trandolapril: approved small molecule (172 associated side effects) For the treatment of mild to moderate hypertension, as an adjunct in the treatment of congestive heart failure (CHF), to improve survival following myocardial infarction (MI) in individuals who are hemodynamically stable and demonstrate symptoms of left ventricular systolic dysfunction or signs of CHF within a few days following acute MI, and to slow progression of renal disease in hypertensive patients with diabetes mellitus and microalbuminuria or overt nephropathy.

cefdinir: approved small molecule (109 associated side effects) For the treatment of the respiratory, skin, soft tissue, and ENT infections caused by *H. influenzae* (including b-lactamase producing strains), *H. parainfluenzae* (including b-lactamase producing strains), *S. pneumoniae* (penicillin-susceptible strains), *S. pyogenes*, *S. aureus* (including b-lactamase producing strains), and *M. catarrhalis*.

benazepril: approved small molecule (103 associated side effects) For the treatment of hypertension. It may be used alone or in combination with thiazide diuretics.

cephalexin: approved small molecule (65 associated side effects)

For the treatment of respiratory tract infections caused by *Streptococcus pneumoniae* and

< i> Streptococcus pyogenes < / i>; otitis media due to < i> Streptococcus pneumoniae < / i>, < i> Haemophilus influenzae < / i>, < i> Staphylococcus aureus < / i>, < i> Streptococcus pyogenes < / i>, and < i> Moraxella catarrhalis < / i>; skin and skin structure infections caused by < i> Staphylococcus aureus < / i> and/or < i> Streptococcus pyogenes < / i>; bone infections caused by < i> Staphylococcus aureus < / i> and/or < i> Proteus mirabilis < / i>; genitourinary tract infections, including acute prostatitis, caused by < i> Escherichia coli < / i>, < i> Proteus mirabilis < / i>, and < i> Klebsiella pneumoniae < / i>.

valaciclovir: approved small molecule (0 associated side effects) For the treatment or suppression of cold sores (herpes labialis), herpes zoster (shingles), genital herpes in immunocompetent individuals, and recurrent genital herpes in HIV-infected individuals.

cefixime: approved small molecule (55 associated side effects)

For use in the treatment of the following infections when caused by susceptible strains of the designated microorganisms: (1) uncomplicated urinary tract infections caused by < i> Escherichia coli < / i> and < i> Proteus mirabilis < / i>; (2) otitis media caused by < i> Haemophilus influenzae < / i> (beta-lactamase positive and negative strains), < i> Moraxella catarrhalis < / i> (most of which are beta-lactamase positive), and < i> S. pyogenes < / i>; (3) pharyngitis and tonsillitis caused by < i> S. pyogenes < / i>; (4) acute bronchitis and acute exacerbations of chronic bronchitis caused by < i> Streptococcus pneumoniae < / i> and < i> Haemophilus influenzae < / i> (beta-lactamase positive and negative strains), and (5) uncomplicated gonorrhea (cervical/urethral) caused by < i> Neisseria gonorrhoeae < / i> (penicillinase- and non-penicillinase-producing strains).

chlorpropamide: approved small molecule (33 associated side effects) For treatment of NIDDM in conjunction with diet and exercise.

moexipril: approved small molecule (74 associated side effects) For the treatment of hypertension.

nateglinide: approved small molecule (32 associated side effects) For the treatment of non-insulin dependent-diabetes mellitus in conjunction with diet and exercise.

perindopril: approved small molecule (187 associated side effects) For the treatment of mild to moderate essential hypertension, mild to moderate congestive heart failure, and to reduce the cardiovascular risk of individuals with hypertension or post-myocardial infarction and stable coronary disease.

cefaclor: approved small molecule (132 associated side effects) For the treatment of certain infections caused by bacteria such as pneumonia and ear, lung, skin, throat, and urinary tract infections.

aminolevulinic acid: approved small molecule (30 associated side effects) Aminolevulinic acid plus blue light illumination using a blue light photodynamic therapy illuminator is indicated for



the treatment of minimally to moderately thick actinic keratoses of the face or scalp.

quinapril: approved small molecule (123 associated side effects) For the treatment of hypertension and as adjunct therapy in the treatment of congestive heart failure. May also be used to slow the rate of progression of renal disease in hypertensive individuals with diabetes mellitus and microalbuminuria or overt nephropathy.

cyclacillin: approved small molecule (0 associated side effects) For the treatment of bacterial infections caused by susceptible organisms.

glyburide: approved small molecule (52 associated side effects)

Indicated as an adjunct to diet to lower the blood glucose in patients with NIDDM whose hyperglycemia cannot be satisfactorily controlled by diet alone.

penicillin g: approved small molecule (0 associated side effects) For use in the treatment of severe infections caused by penicillin G-susceptible microorganisms when rapid and high penicillin levels are required such as in the treatment of septicemia, meningitis, pericarditis, endocarditis and severe pneumonia.

amoxicillin: approved small molecule (66 associated side effects) For the treatment of infections of the ear, nose, and throat, the genitourinary tract, the skin and skin structure, and the lower respiratory tract due to susceptible (only b-lactamase-negative) strains of *Streptococcus* spp. (a- and b-hemolytic strains only), *S. pneumoniae*, *Staphylococcus* spp., *H. influenzae*, *E. coli*, *P. mirabilis*, or *E. faecalis*. Also for the treatment of acute, uncomplicated gonorrhea (ano-genital and urethral infections) due to *N. gonorrhoeae* (males and females).

cefuroxime: approved small molecule (107 associated side effects) For the treatment of many different types of bacterial infections such as bronchitis, sinusitis, tonsillitis, ear infections, skin infections, gonorrhea, and urinary tract infections.

tolbutamide: approved small molecule (0 associated side effects) For treatment of NIDDM (non-insulin-dependent diabetes mellitus) in conjunction with diet and exercise.

cefadroxil: approved small molecule (63 associated side effects)

For the treatment of the following infections (skin, UTI, ENT) caused by; *S. pneumoniae*, *H. influenzae*, staphylococci, *S. pyogenes* (group A beta-hemolytic streptococci), *E. coli*, *P. mirabilis*, *Klebsiella* sp, coagulase-negative staphylococci and *Streptococcus pyogenes*.

ceftriaxone: approved small molecule (95 associated side effects) For the treatment of the infections (respiratory, skin, soft tissue, UTI, ENT) caused by *S. pneumoniae*, *H. influenzae*, staphylococci, *S. pyogenes* (group A beta-hemolytic streptococci), *E. coli*, *P. mirabilis*, *Klebsiella* sp, coagulase-negative staph

cefradine: approved small molecule (0 associated side effects)

cilazapril: approved small molecule (146 associated side effects) Cilazapril is an ACE inhibitor class drug used in the treatment of hypertension and heart failure.

spirapril: approved small molecule (0 associated side effects) Spirapril is an ACE inhibitor class drug used to treat hypertension.

cefepime: approved small molecule (73 associated side effects)

For the treatment of pneumonia (moderate to severe) caused by *Streptococcus pneumoniae*, including cases associated with concurrent bacteremia, *Pseudomonas aeruginosa*, *Klebsiella pneumoniae*, or *Enterobacter* species. Also for empiric treatment of febrile neutropenic patients and uncomplicated and complicated urinary tract infections (including pyelonephritis) caused by *Escherichia coli* or *Klebsiella pneumoniae*, when the infection is severe, or caused by *Escherichia coli*, *Klebsiella pneumoniae*, or *Proteus mirabilis*, when the infection is mild to moderate, including cases associated with concurrent bacteremia with these microorganisms. Also for the treatment of uncomplicated skin and skin structure infections caused by *Staphylococcus aureus* (methicillin-susceptible strains only) or *Streptococcus pyogenes* and complicated intra-abdominal infections (used in combination with metronidazole) caused by *Escherichia coli*, viridans group streptococci, *Pseudomonas aeruginosa*, *Klebsiella pneumoniae*, *Enterobacter* species, or *Bacteroides fragilis*.

ceftibuten: approved small molecule (0 associated side effects)

Used to treat acute bacterial exacerbations of chronic bronchitis (ABECB), acute bacterial otitis media, pharyngitis, and tonsillitis.

bestatin: experimental small molecule (0 associated side effects)

azidocillin: approved small molecule (0 associated side effects) For treatment of infection (Respiratory, GI, UTI and meningitis) due to *E. coli*, *P. mirabilis*, enterococci, *Shigella*, *S. typhosa* and other *Salmonella*, nonpenicillinase-producing *N. gonorrhoeae*, *H. influenzae*, staphylococci, streptococci including streptococ

538 known side effects mediated through drugs targeting this protein:

Abdominal discomfort Abdominal distension Abdominal pain  
Abdominal pain upper Abnormal dreams Abnormal faeces Acne  
Acute coronary syndrome Acute generalised exanthematous  
pustulosis Acute hepatic failure Acute respiratory failure  
Affect lability Ageusia Agitation Agranulocytosis  
Alanine aminotransferase increased Alopecia Alveolitis  
allergic Amblyopia Amnesia Anaemia Anaemia haemolytic  
autoimmune Anal pruritus Anaphylactic shock Anaphylactoid  
reaction Angina pectoris Angioedema Angiopathy Anorectal  
discomfort Anorectal disorder Antinuclear antibody positive  
Anxiety Aortic dissection Apathy Aplastic anaemia

Arrhythmia Arrhythmia supraventricular Arterial disorder  
 Arterial stenosis Arthralgia Arthritis Arthropathy Aspartate  
 aminotransferase increased Asphyxia Asterixis Asthenia  
 Asthma Ataxia Atrial fibrillation Atrial flutter  
 Atrioventricular block first degree Aura Azotaemia Back  
 pain Balance disorder Basophilia Blepharitis Blindness Blister  
 Blood albumin decreased Blood alkaline phosphatase  
 increased Blood amylase increased Blood bilirubin increased  
 Blood creatine phosphokinase increased Blood creatinine  
 decreased Blood creatinine increased Blood disorder Blood  
 lactate dehydrogenase increased Blood phosphorus decreased Blood  
 potassium increased Blood pressure increased Blood sodium  
 increased Blood urea increased Blood uric acid increased Blood  
 urine Blood urine present Body temperature increased Bone pain  
 Bradycardia Breast disorder Bronchioloalveolar carcinoma  
 Bronchitis Bronchospasm Candidiasis Cardiac arrest  
 Cardiac disorder Cardiac failure Cardiac failure congestive  
 Cardiac fibrillation Cardiac flutter Cardiac murmur  
 Cardiac tamponade Cardio-respiratory arrest Cardiogenic shock  
 Cerebral infarction Cerebrovascular accident  
 Cerebrovascular disorder Cervical dysplasia Chest pain  
 Chills Choking sensation Cholelithiasis Cholestasis  
 Chromaturia Coagulopathy Cognitive disorder Colitis  
 Collagen-vascular disease Coma Conduction disorder  
 Confusional state Congenital anomaly Congenital arterial  
 malformation Conjunctival oedema Conjunctivitis Connective  
 tissue disorder Constipation Convulsion Coombs direct test  
 positive Coombs test positive Coordination abnormal Coronary  
 artery disease Cough Cranial nerve disorder Crystal urine  
 Crystalluria Cutaneous vasculitis Cytolytic hepatitis  
 Deafness Death Decreased appetite Dehydration Depressed  
 level of consciousness Depressed mood Dermatitis Dermatitis atopic  
 Dermatitis bullous Dermatitis diaper Dermatitis exfoliative  
 Dermatomyositis Developmental delay Diarrhoea Diarrhoea  
 haemorrhagic Disability Discomfort Disseminated intravascular  
 coagulation Disturbance in sexual arousal Dizziness Dizziness  
 postural Drug hypersensitivity Drug interaction Drug intolerance  
 Dry mouth Dry skin Dysaesthesia Dysgeusia Dyskinesia  
 Dysmenorrhoea Dyspepsia Dysphagia Dysphonia Dyspnoea  
 Dysuria Ear infection Ear pain Ecchymosis Eczema  
 Electrocardiogram abnormal Electrocardiogram change  
 Enanthema Encephalopathy Endometrial sarcoma  
 Enterocolitis Enterocolitis haemorrhagic Enzyme  
 abnormality Eosinophilia Eosinophilic pneumonia Epistaxis  
 Erectile dysfunction Erythema Erythema multiforme  
 Erythema nodosum Erythropenia Eschar Extrasystoles  
 Eye disorder Eye irritation Face oedema Fatigue  
 Febrile neutropenia Feeling abnormal Feeling cold  
 Fibrosis Flank pain Flat affect Flatulence Fluid retention  
 Flushing Fungal infection Gamma-glutamyltransferase  
 increased Gastritis Gastroenteritis Gastrointestinal disorder  
 Gastrointestinal haemorrhage Gastrointestinal infection  
 Gastrointestinal pain Gastrointestinal tract irritation  
 Generalised oedema Genital candidiasis Genital discharge  
 Glossitis Glossodynia Glycosuria Gout Haematemesis

Haematochezia Haematocrit decreased Haematoma Haematuria  
 Haemoglobin Haemoglobin decreased Haemolysis Haemolytic  
 anaemia Haemoptysis Haemorrhage Haemorrhagic disorder  
 Hallucination Headache Hearing impaired Hepatic enzyme  
 increased Hepatic failure Hepatic function abnormal Hepatic  
 necrosis Hepatitis Hepatitis acute Hepatitis cholestatic  
 Hepatitis fulminant Hepatobiliary disease Hepatocellular  
 injury Hepatomegaly Hereditary disorder Herpes simplex  
 Herpes virus infection Hot flush Hunger  
 Hyperbilirubinaemia Hypercalcaemia Hypercholesterolaemia  
 Hyperglycaemia Hyperhidrosis Hyperkalaemia  
 Hyperkinesia Hyperlipidaemia Hypersensitivity  
 Hypertension Hypertensive crisis Hypertonia Hypertrophy  
 Hyperuricaemia Hypoaesthesia Hypocalcaemia  
 Hypoglycaemia Hyponatraemia Hypopituitarism Hypotension  
 Hypovolaemia Ichthyosis acquired Idiopathic  
 thrombocytopenic purpura Ileus Ill-defined disorder Illusion  
 Immune system disorder Inappropriate antidiuretic hormone  
 secretion Incontinence Increased appetite Induration  
 Infarction Infection Infestation Inflammation Influenza  
 Injection site inflammation Injection site pain Injection  
 site reaction Insomnia Intermittent claudication  
 Interstitial lung disease Intertrigo candida Intestinal  
 infarction Irritability Ischaemia Ischaemic stroke Jaundice  
 Jaundice cholestatic Joint swelling Laboratory test  
 abnormal Lacrimation increased Laryngeal disorder Laryngeal  
 oedema Laryngitis Laryngospasm Lethargy Leukocytoclastic  
 vasculitis Leukocytosis Leukopenia Libido decreased Lip oedema  
 Liver disorder Liver function test abnormal Liver injury  
 Local reaction Loss of consciousness Lower respiratory  
 tract infection Lung disorder Lymphadenopathy Lymphocytosis  
 Lymphopenia Malaise Male sexual dysfunction  
 Malnutrition Mean cell volume Mediastinal disorder  
 Melaena Memory impairment Menopausal symptoms Menstrual  
 disorder Mental disorder Micturition disorder Migraine without  
 aura Monocytosis Mood swings Mouth ulceration Mucocutaneous  
 candidiasis Mucous membrane disorder Multiple hereditary  
 exostosis Muscle spasms Muscle twitching Muscular weakness  
 Musculoskeletal discomfort Musculoskeletal pain  
 Musculoskeletal stiffness Myalgia Myocardial infarction  
 Myocardial ischaemia Myoclonus Nail disorder Nasal  
 congestion Nasopharyngitis Nausea Neck pain Necrosis  
 Neoplasm malignant Nephritis Nephrolithiasis Nephropathy  
 Nephropathy toxic Nervous system disorder Nervousness  
 Neuralgia Neuropathy peripheral Neutropenia Nocturia  
 Oedema Oedema peripheral Oesophageal disorder Oesophageal  
 ulcer Oesophagitis Oliguria Onycholysis Oral candidiasis Oral  
 herpes Oropharyngeal discomfort Oropharyngeal pain  
 Orthostatic hypotension Osteoarthritis Pain Pain in  
 extremity Palpitations Pancreatic disorder Pancreatitis  
 Pancreatitis acute Pancytopenia Paraesthesia  
 Pemphigoid Pemphigus Peptic ulcer Peripheral coldness  
 Peripheral vascular disorder Pharyngitis Phlebitis Photophobia  
 Photosensitivity reaction Pica Pigmentation disorder  
 Platelet count decreased Platelet disorder Pleuritic pain

Pneumonia Pollakiuria Polyneuropathy Polyuria Porphyria  
 Porphyria non-acute Presyncope Proctocolitis Productive  
 cough Protein urine present Proteinuria Prothrombin level increased  
 Prothrombin time shortened Prurigo Pruritus Pruritus  
 genital Pseudomembranous colitis Psoriasis Psychosexual  
 disorder Pulmonary eosinophilia Pulmonary fibrosis Purpura  
 Rash Rash erythematous Rash maculo-papular Rash papular  
 Rash pustular Raynaud's phenomenon Rectal haemorrhage  
 Red blood cell sedimentation rate increased Renal artery  
 stenosis Renal failure Renal failure acute Renal impairment  
 Renal pain Renal tubular disorder Respiration abnormal  
 Respiratory arrest Respiratory disorder Respiratory  
 failure Respiratory tract infection Rhabdomyolysis Rheumatic  
 fever Rhinitis seasonal Rhinorrhoea Salivary hypersecretion Scab  
 Scleroderma Scrotal oedema Seasonal allergy Seborrhoeic  
 dermatitis Sensitisation Sensory loss Serositis Serum  
 sickness Sexual dysfunction Shock Sinusitis Skin cancer Skin  
 candida Skin disorder Skin exfoliation Skin hyperpigmentation  
 Skin hypertrophy Skin induration Skin infection Sleep  
 disorder Sneezing Somnolence Speech disorder Status  
 epilepticus Stevens-Johnson syndrome Stomatitis Stridor  
 Stupor Sudden death Superinfection Swelling  
 Swollen tongue Syncope Syphilis Systemic lupus  
 erythematosus Tachycardia Tenderness Tension Thirst  
 Thrombocytopenia Thrombocytopenic purpura Thrombocytosis  
 Thrombophlebitis Tinea infection Tinnitus Tongue  
 discolouration Tongue disorder Tongue oedema Tooth  
 discolouration Toxic epidermal necrolysis Tracheobronchitis  
 Transaminases increased Transient ischaemic attack  
 Tremor Trismus Tubulointerstitial nephritis Type IV  
 hypersensitivity reaction Ulcer Upper gastrointestinal haemorrhage  
 Upper respiratory tract infection Upper respiratory tract  
 inflammation Upper-airway cough syndrome Urethral disorder  
 Urethral pain Urinary incontinence Urinary retention  
 Urinary tract disorder Urinary tract infection Urine  
 analysis abnormal Urine output increased Urticaria Vaginal discharge  
 Vaginal infection Vaginal inflammation Varicose vein  
 Vascular purpura Vascular stenosis Vasculitis Vasodilation  
 procedure Ventricular extrasystoles Ventricular tachycardia  
 Vertigo Viral infection Vision blurred Visual acuity  
 reduced Visual impairment Vomiting Vulvovaginal candidiasis  
 Vulvovaginal discomfort Vulvovaginal mycotic infection  
 Vulvovaginal pruritus Weight increased White blood cell count  
 decreased White blood cells urine positive

\*\*\*\*\*  
 \*\*\*\*\*

Potassium voltage-gated channel subfamily D member 2 - Group:  
 Channel

Treated with:

disopyramide: approved small molecule (85 associated side  
 effects) For the treatment of documented ventricular arrhythmias,  
 such as sustained ventricular tachycardia, ventricular pre-  
 excitation and cardiac dysrhythmias. It is a Class Ia antiarrhythmic  
 drug.

amitriptyline: approved small molecule (109 associated side effects) For the treatment of depression, chronic pain, irritable bowel syndrome, sleep disorders, diabetic neuropathy, agitation and insomnia, and migraine prophylaxis.

imipramine: approved small molecule (100 associated side effects) For the relief of symptoms of depression and as temporary adjunctive therapy in reducing enuresis in children aged 6 years and older. May also be used to manage panic disorders, with or without agoraphobia, as a second line agent in ADHD, management of eating disorders, for short-term management of acute depressive episodes in bipolar disorder and schizophrenia, and for symptomatic treatment of postherpetic neuralgia.

160 known side effects mediated through drugs targeting this protein:

Abdominal distension Abdominal pain upper Accommodation disorder  
Acute coronary syndrome Acute psychosis Affect lability  
Ageusia Agitation Agranulocytosis Alopecia Angioedema  
Antinuclear antibody positive Anxiety Arrhythmia  
Arthritis Asthenia Ataxia Atrioventricular block Blood  
creatinine increased Blood urea increased Body temperature  
increased Bradycardia Breast enlargement Cardiac arrest  
Cardiac failure Cardiac failure congestive Cardiac  
fibrillation Cardiomyopathy Cerebrovascular accident Chest  
pain Coma Conduction disorder Confusional state Constipation  
Convulsion Coordination abnormal Cyanosis Decreased  
appetite Delusion Dependence Dermatitis Dermatitis atopic  
Diarrhoea Diplopia Discomfort Disorientation  
Dissociation Disturbance in attention Disturbance in  
sexual arousal Dizziness Drug dependence Dry eye Dry mouth  
Dysarthria Dysgeusia Dyskinesia Dyspepsia Dyspnoea  
Dysuria Eosinophilia Erectile dysfunction  
Extrapyramidal disorder Face oedema Fatigue Feeling  
abnormal Feeling hot Flatulence Flushing Galactorrhoea  
Gynaecomastia Haemoglobin decreased Hallucination  
Headache Hepatic enzyme increased Hepatic failure  
Hepatitis Hypercholesterolaemia Hyperhidrosis  
Hyperpyrexia Hypertension Hypertrophy Hypoaesthesia  
Hypoglycaemia Hypokalaemia Hypomania Hypotension Ileus  
paralytic Ill-defined disorder Inappropriate antidiuretic hormone  
secretion Infarction Insomnia Intraocular pressure increased  
Irritability Jaundice Jaundice cholestatic Leukopenia  
Libido decreased Loss of consciousness Lymphadenitis  
Malaise Mania Mental disability Mental disorder Mental  
status changes Mood swings Muscle rigidity Muscle spasms  
Muscular weakness Mydriasis Myocardial infarction Nasal  
dryness Nausea Nervousness Neuroleptic malignant syndrome  
Neuropathy peripheral Neutropenia Nightmare Nodal rhythm  
Oedema Orthostatic hypotension Osteoarthritis Pain  
Pallor Palpitations Pancytopenia Paraesthesia  
Parotid gland enlargement Petechiae Pollakiuria Pruritus  
Psychotic disorder Purpura Rash generalised Rash  
morbilliform Sensory loss Shock Sinus arrest Skin  
disorder Sleep disorder Somnolence Stomatitis Swelling  
Syncope Systemic lupus erythematosus Tachycardia Tardive

dyskinesia Tension Testicular swelling Thrombocytopenia  
Tinnitus Tongue discolouration Tremor Urinary  
hesitation Urinary retentionUrticaria Vascular purpura Vertigo  
Vision blurred Vomiting Weight increased

\*\*\*\*\*  
\*\*\*\*\*

D(1A) dopamine receptor - Group: Receptor

Treated with:

ziprasidone: approved small molecule (251 associated side effects) For the treatment of schizophrenia and related psychotic disorders.

cabergoline: approved small molecule (96 associated side effects) For the treatment of hyperprolactinemic disorders, either idiopathic or due to prolactinoma (prolactin-secreting adenomas). May also be used to manage symptoms of Parkinsonian Syndrome as monotherapy during initial symptomatic management or as an adjunct to levodopa therapy during advanced stages of disease.

ropinirole: approved small molecule (631 associated side effects) For the treatment of the signs and symptoms of idiopathic Parkinson's disease. Also used for the treatment of restless legs syndrome.

olanzapine: approved small molecule (393 associated side effects) For the acute and maintenance treatment of schizophrenia and related psychotic disorders, as well as acute treatment of manic or mixed episodes of bipolar 1 disorder. Intramuscular olanzapine is indicated for the rapid control of agitated patients.

methylergonovine: approved small molecule (0 associated side effects) For the prevention and control of excessive bleeding following vaginal childbirth

clozapine: approved small molecule (228 associated side effects) For use in patients with treatment-resistant schizophrenia.

thiethylperazine: approved small molecule (0 associated side effects) For the treatment or relief of nausea and vomiting.

phenylpropanolamine: approved, withdrawn small molecule (0 associated side effects) For the treatment of nasal congestion, control of urinary incontinence, priapism and obesity.

loxapine: approved small molecule (74 associated side effects) For the management of the manifestations of psychotic disorders such as schizophrenia

pramipexole: approved small molecule (620 associated side effects) For the treatment of signs and symptoms of idiopathic Parkinson's disease

promazine: approved small molecule (0 associated side effects) Used as an adjunct for short term treatment of moderate and severe psychomotor agitation. Also used to treat agitation or restlessness in the elderly.

chlorpromazine: approved small molecule (111 associated side effects) For the treatment of schizophrenia, control nausea and vomiting, For relief of restlessness and apprehension before surgery, adjunct in the treatment of tetanus, control the manifestations of the manic type of manic-depressive illness.

haloperidol: approved small molecule (79 associated side effects) For the management of psychotic disorders (eg. schizophrenia) and delirium, as well as to control tics and vocal

utterances of Tourette's syndrome (Gilles de la Tourette's syndrome). Also used for the treatment of severe behavioural problems in children with disruptive behaviour disorder or ADHD (attention-deficit hyperactivity disorder). Haloperidol has been used in the prevention and control of severe nausea and vomiting.

triflupromazine: approved small molecule (0 associated side effects) Used mainly in the management of psychoses. Also used to control nausea and vomiting.

amoxapine: approved small molecule (103 associated side effects) For the relief of symptoms of depression in patients with neurotic or reactive depressive disorders as well as endogenous and psychotic depressions. May also be used to treat depression accompanied by anxiety or agitation.

lisuride: approved small molecule (0 associated side effects)  
For the management of Parkinson's Disease

fluphenazine: approved small molecule (122 associated side effects) For management of manifestations of psychotic disorders.

thioridazine: approved small molecule (92 associated side effects) For the treatment of schizophrenia and generalized anxiety disorder.

apomorphine: approved small molecule (45 associated side effects) For the acute, intermittent treatment of hypomobility, off episodes (end-of-dose wearing off and unpredictable on/off episodes) associated with advanced Parkinson's disease.

trimipramine: approved small molecule (0 associated side effects) For the treatment of depression and depression accompanied by anxiety, agitation or sleep disturbance

risperidone: approved small molecule (532 associated side effects) For the treatment of schizophrenia in adults and in adolescents, ages 13 to 17, and for the short-term treatment of manic or mixed episodes of bipolar I disorder in children and adolescents ages 10 to 17. May also be used to manage symptoms of inappropriate behavior due to aggression and/or psychosis in patients with severe dementia.

propiomazine: approved small molecule (0 associated side effects) Propiomazine is largely used for its antihistaminic sleep inducing effects in treating insomnia.

fenoldopam: approved small molecule (51 associated side effects)  
For the in-hospital, short-term (up to 48 hours) management of severe hypertension when rapid, but quickly reversible, emergency reduction of blood pressure is clinically indicated, including malignant hypertension with deteriorating end-organ function.

minaprine: approved small molecule (0 associated side effects)  
For the treatment of depression

perphenazine: approved small molecule (131 associated side effects) For use in the management of the manifestations of psychotic disorders and for the control of severe nausea and vomiting in adults.

flupenthixol: approved small molecule (0 associated side effects) For use in the treatment of schizophrenia and depression

dopamine: approved small molecule (23 associated side effects)  
For the correction of hemodynamic imbalances present in the shock syndrome due to myocardial infarction, trauma, endotoxic septicemia, open-heart surgery, renal failure, and chronic cardiac decompensation as in congestive failure



carphenazine: approved small molecule (0 associated side effects) Used in the treatment of acute or chronic schizophrenic reactions in hospitalized patients.

acetophenazine: approved small molecule (0 associated side effects) For the treatment of disorganized and psychotic thinking. Also used to help treat false perceptions (e.g. hallucinations or delusions.)

pergolide: approved,withdrawn small molecule (354 associated side effects) Indicated as adjunctive treatment to levodopa/carbidopa in the management of the signs and symptoms of Parkinson's disease. It was withdrawn from the US and Canadian markets in 2007 due to an increased risk of cardiac valvulopathy.

bromocriptine: approved small molecule (120 associated side effects) For the treatment of galactorrhea due to hyperprolactinemia, prolactin-dependent menstrual disorders and infertility, prolactin-secreting adenomas, prolactin-dependent male hypogonadism, as adjunct therapy to surgery or radiotherapy for acromegaly or as monotherapy in special cases, as monotherapy in early Parkinsonian Syndrome or as an adjunct with levodopa in advanced cases with motor complications. Bromocriptine has also been used off-label to treat restless legs syndrome and neuroleptic malignant syndrome.

quetiapine: approved small molecule (359 associated side effects) For the treatment of schizophrenia and related psychotic disorders.

aripiprazole: approved small molecule (630 associated side effects) For the treatment of schizophrenia and related psychotic disorders.

chlorprothixene: approved small molecule (0 associated side effects) For treatment of psychotic disorders (e.g. schizophrenia) and of acute mania occurring as part of bipolar disorders.

paliperidone: approved small molecule (216 associated side effects) For the treatment of schizophrenia.

dihydroergotoxine: approved small molecule (0 associated side effects) For potential use in the treatment of Alzheimer's disease.

methotrimeprazine: approved small molecule (0 associated side effects) For the treatment of psychosis, particular those of schizophrenia, and manic phases of bipolar disorder.

propericiazine: approved small molecule (0 associated side effects) For use as adjunctive medication in some psychotic patients. Propericiazine (Pericyazine) is used for the control of residual prevailing hostility, impulsiveness and aggressiveness.

acepromazine: approved small molecule (0 associated side effects) Acepromazine was first used in humans in the 1950s as an antipsychotic agent. It is now rarely used in humans. Acepromazine is frequently used in animals as a sedative and antiemetic. Its principal value is in quietening and calming anxious animals.

pipotiazine: approved small molecule (94 associated side effects) For the maintenance treatment of chronic non-agitated schizophrenic patients.

thiopropazine: approved small molecule (0 associated side effects) For the treatment of all types of acute and chronic schizophrenia, including those which did not respond to the usual neuroleptics; manic syndromes.

thiothixene: approved small molecule (79 associated side effects) For the management of schizophrenia.  
 zuclopenthixol: approved small molecule (0 associated side effects) For the management of the manifestations of schizophrenia.  
 rotigotine: approved small molecule (93 associated side effects) For use/treatment in neurologic disorders and parkinson's disease as well as moderate-to-severe primary Restless Legs Syndrome.

1275 known side effects mediated through drugs targeting this protein:

Abasia Abdominal adhesions Abdominal discomfort Abdominal distension Abdominal neoplasm Abdominal pain Abdominal pain lower Abdominal pain upper Abdominal tenderness Abnormal behaviour Abnormal dreams Abnormal faeces Abscess Accommodation disorder Acidosis Acne Actinic keratosis Acute abdomen Acute coronary syndrome Acute lymphocytic leukaemia benign Adhesion Affect lability Affective disorder Ageusia Aggression Agitation Agoraphobia Agranulocytosis Akathisia Akinesia Alanine aminotransferase increased Albright's disease Albuminuria Alcohol intolerance Alkalosis Alopecia Altered state of consciousness Amaurosis fugax Amblyopia Amenorrhoea Amnesia Anaemia Anaemia macrocytic Anaemia megaloblastic Anaphylactic shock Anaphylactoid reaction Aneurysm Anger Angina pectoris Angina unstable Angioedema Angiomyolipoma Angiopathy Angle closure glaucoma Anorectal discomfort Anorectal disorder Anorgasmia Antidiuretic hormone abnormality Antisocial behaviour Antisocial personality disorder Anxiety Aortic dissection Apathy Aphasia Aphthous stomatitis Aplastic anaemia Apnoea Appendicitis Application site reaction Apraxia Argininosuccinate synthetase deficiency Arrhythmia Arrhythmia supraventricular Arterial disorder Arterial occlusive disease Arterial stenosis Arteriosclerosis Arteritis Arthralgia Arthritis Arthropathy Ascites Asocial behaviour Aspartate aminotransferase increased Asphyxia Aspiration Asthenia Asthma Ataxia Atelectasis Athetosis Atrial fibrillation Atrial flutter Atrial septal defect Atrioventricular block first degree Atrioventricular block second degree Atrophy Aura Automatism Autonomic nervous system imbalance Azotaemia Back pain Bacterial infection Balance disorder Balanoposthitis Basal cell carcinoma Basophilia Benign intracranial hypertension Benign neoplasm Benign neoplasm of skin Benign prostatic hyperplasia Biliary colic Binge eating Bladder cancer Bladder disorder Bladder pain Blepharitis Blepharospasm Blindness Blindness transient Blister Blood alkaline phosphatase increased Blood amylase increased Blood antidiuretic hormone abnormal Blood bilirubin increased Blood cholesterol increased Blood creatine phosphokinase increased Blood creatinine increased Blood disorder Blood electrolytes abnormal Blood glucose decreased Blood glucose increased Blood insulin increased Blood iron decreased Blood lactate dehydrogenase

increased Blood phosphorus increased Blood potassium decreased  
 Blood potassium increased Blood pressure abnormal Blood  
 pressure diastolic decreased Blood pressure fluctuation Blood  
 pressure increased Blood pressure systolic decreased Blood  
 prolactin increased Blood testosterone decreased Blood  
 triglycerides increased Blood triglycerides normal Blood urea  
 increased Blood uric acid increased Blood urine Blood urine  
 present Blunted affect Body temperature decreased Body  
 temperature increased Bone disorder Bone pain Bone sarcoma  
 Bradycardia Bradykinesia Bradyphrenia Brain neoplasm  
 Brain neoplasm benign Brain oedema Breast cancer  
 Breast cyst Breast discharge Breast discomfort Breast disorder  
 Breast disorder female Breast disorder male Breast  
 engorgement Breast enlargement Breast feeding Breast neoplasm  
 Breast pain Breast swelling Breast tenderness Breath odour  
 Bronchiolitis Bronchitis Bronchopneumonia  
 Bronchopneumopathy Bronchospasm Bruxism  
 Buccoglossal syndrome Bulimia nervosa Bundle branch block  
 Bundle branch block left Bundle branch block right  
 Burning sensation Bursitis Cachexia Calculus bladder  
 Calculus urinary Cancer in remission Candidiasis  
 Carbohydrate tolerance decreased Cardiac arrest Cardiac  
 disorder Cardiac failure Cardiac failure congestive Cardiac  
 fibrillation Cardiac flutter Cardiac murmur Cardiac septal  
 defect Cardiac valve disease Cardio-respiratory arrest  
 Cardiomegaly Cardiomyopathy Cardiopulmonary failure  
 Cardiovascular disorder Carotid artery occlusion  
 Carpal tunnel syndrome Cataplexy Cataract Catatonia Cells  
 in urine Cellulitis Cerebral artery embolism Cerebral atrophy  
 Cerebral haemorrhage Cerebral infarction Cerebral  
 ischaemia Cerebrospinal fluid rhinorrhoea Cerebrovascular  
 accident Cerebrovascular disorder Cervicitis Cervix carcinoma  
 Chapped lips Cheilitis Chest discomfort Chest pain  
 Chills Choking Cholecystitis Cholecystitis chronic  
 Cholelithiasis Cholestasis Chorea Choreoathetosis  
 Chromaturia Chronic lymphocytic leukaemia Chronic  
 obstructive pulmonary disease Coagulopathy Coccydynia  
 Cognitive disorder Cogwheel rigidity Cold sweat Colitis  
 Colitis ulcerative Colon cancer Colorectal cancer Coma  
 Completed suicide Compulsions Condition aggravated Conduction  
 disorder Confusional state Congenital anomaly Congenital eye  
 disorder Congenital foot malformation Congenital genitourinary  
 abnormality Conjunctival disorder Conjunctival haemorrhage  
 Conjunctivitis Connective tissue disorder Constipation  
 Convulsion Coordination abnormal Corneal deposits Corneal  
 lesion Corneal opacity Coronary artery disease Coronary  
 artery occlusion Costochondritis Cough Crocodile tears syndrome  
 Crying Cyanosis Cystitis Cystitis noninfective  
 Cytolytic hepatitis Dandruff Deafness Death Decreased  
 appetite Decubitus ulcer Deep vein thrombosis Deficiency  
 anaemia Dehydration Delirium Delusion Dementia Dementia  
 with Lewy bodies Dental caries Dependence Depersonalisation  
 Depressed level of consciousness Depressed mood Depression  
 Depressive symptom Derealisation Dermal cyst Dermatitis  
 atopic Dermatitis bullous Dermatitis contact Dermatitis

exfoliative Dermatitis infected Dermoid cyst Developmental  
 delay Diabetes mellitus Diabetic coma Diabetic hyperglycaemic coma  
 Diabetic hyperosmolar coma Diabetic ketoacidosis  
 Diaphragmatic hernia Diarrhoea Diplopia Discomfort  
 Disorientation Disseminated intravascular coagulation  
 Dissociation Disturbance in attention Disturbance in  
 sexual arousal Diverticulitis Dizziness Dizziness exertional  
 Dizziness postural Drooling Drug abuse Drug dependence  
 Drug eruption Drug hypersensitivity Drug ineffective Drug  
 interaction Drug level increased Drug withdrawal syndrome Drug  
 withdrawal syndrome neonatal Dry eye Dry mouth Dry skin Dry  
 throat Duodenal ulcer Duodenal ulcer haemorrhage Duodenitis  
 Dysarthria Dysentery Dysgeusia Dysgraphia Dyskinesia  
 Dysmenorrhoea Dyspepsia Dysphagia Dysphemia Dysphonia  
 Dysphoria Dyspnoea Dyspnoea exertional Dystonia  
 Dysuria Ear disorder Ear infection Ear pain  
 Ecchymosis Eclampsia Eczema Effusion Ejaculation  
 delayed Ejaculation disorder Ejaculation failure Elastosis  
 perforans Elderly Electrocardiogram QRS complex  
 Electrocardiogram QT prolonged Electrocardiogram ST segment  
 depression Electrocardiogram ST segment elevation Electrocardiogram  
 T wave inversion Electrocardiogram abnormal Electrocardiogram  
 change Electrocardiogram normal Electroencephalogram  
 abnormal Electrolyte imbalance Embolism Emotional distress  
 Emphysema Encephalopathy Endocrine disorder Endometrial  
 cancer Endometrial neoplasm Energy increased Enteritis  
 Enuresis Enzyme abnormality Eosinophil count increased  
 Eosinophilia Epicondylitis Epididymitis Epilepsy  
 Epistaxis Erectile dysfunction Eructation Erythema  
 Erythema multiforme Erythromelalgia Euphoric mood  
 Exfoliative rash Exostosis Extrapyrarnidal disorder  
 Extrasystoles Eye discharge Eye disorder Eye  
 haemorrhage Eye infection Eye inflammation Eye irritation Eye  
 movement disorder Eye pain Eye swelling Eyelid disorder  
 Eyelid function disorder Eyelid oedema Eyelid ptosis  
 Face oedema Facial pain Facial paresis Faecal incontinence  
 Faecalith Faecaloma Faeces discoloured Faeces hard  
 Fasciitis Fasting Fatigue Fear Feeling abnormal  
 Feeling cold Feeling hot Feeling jittery Female sexual  
 dysfunction Fibroadenoma of breast Fibrocystic breast disease  
 Fibrosis Flank pain Flat affect Flatulence Fluid overload  
 Fluid retention Flushing Foetor hepaticus Folliculitis  
 Formication Fungal infection Fungal skin infection Furuncle  
 Gait disturbance Galactorrhoea Gallbladder cancer  
 Gallbladder disorder Gamma-glutamyltransferase increased  
 Gangrene Gastric cancer Gastric disorder Gastric  
 haemorrhage Gastric pH decreased Gastric polyps Gastric ulcer  
 Gastric ulcer haemorrhage Gastritis Gastritis haemorrhagic  
 Gastroenteritis Gastrointestinal disorder Gastrointestinal  
 haemorrhage Gastrointestinal infection Gastrointestinal neoplasm  
 Gastrointestinal obstruction Gastrointestinal pain  
 Gastrointestinal stromal tumour Gastrooesophageal reflux  
 disease Generalised oedema Genital candidiasis Genital  
 discharge Gestational hypertension Gingival bleeding Gingival  
 infection Gingival pain Gingivitis Glaucoma Glossitis

Glossodynia Glucose tolerance decreased Glucose tolerance  
 impaired Glycosuria Glycosylated haemoglobin increased Goitre  
 Gout Grand mal convulsion Gravitational oedema Groin pain  
 Gynaecomastia Haemangioma Haematemesis Haematochezia  
 Haematocrit decreased Haematoma Haematuria Haemoglobin  
 Haemoglobin decreased Haemoglobin increased Haemolysis  
 Haemolytic anaemia Haemoptysis Haemorrhage Haemorrhage  
 intracranial Haemorrhoids Haemothorax Hallucination  
 Hallucination, auditory Hallucination, visual Hangover  
 Head discomfort Head titubation Headache Hearing impaired  
 Heart disease congenital Heart rate irregular Hemianopia  
 Hemiparesis Hemiplegia Hepatic cirrhosis Hepatic enzyme  
 increased Hepatic failure Hepatic function abnormal Hepatic  
 neoplasm malignant Hepatic steatosis Hepatitis Hepatitis A  
 Hepatitis cholestatic Hepatobiliary disease Hepatocellular  
 injury Hepatomegaly Hereditary disorder Hernia  
 Herpes simplex Herpes virus infection Herpes zoster  
 Hiccups Hirsutism Homicidal ideation Hordeolum  
 Hormone level abnormal Hostility Hot flush Hunger  
 Hydrocephalus Hyperacusis Hyperaemia Hyperaesthesia  
 Hyperammonaemia Hyperbilirubinaemia Hyperchloraemia  
 Hyperchlorhydria Hypercholesterolaemia Hyperglycaemia  
 Hyperhidrosis Hyperinsulinism Hyperkalaemia  
 Hyperkeratosis Hyperkinesia Hyperlipidaemia  
 Hypernatraemia Hyperparathyroidism Hyperphagia  
 Hyperphosphataemia Hyperplasia Hyperprolactinaemia  
 Hyperpyrexia Hyperreflexia Hypersensitivity  
 Hypersexuality Hypersomnia Hypertension Hypertensive  
 crisis Hyperthermia Hyperthyroidism Hypertonia Hypertonic  
 bladder Hypertrichosis Hypertriglyceridaemia Hypertrophy  
 Hyperuricaemia Hyperuricosuria Hyperventilation  
 Hypoaesthesia Hypoaesthesia oral Hypocalcaemia  
 Hypochloraemia Hypocholesterolaemia Hypochromic anaemia  
 Hypoglycaemia Hypogonadism Hypohidrosis  
 Hypokalaemia Hypokinesia Hypomagnesaemia Hypomania  
 Hypomenorrhoea Hyponatraemia Hypophagia Hypoproteinaemia  
 Hyporeflexia Hypotension Hypothermia Hypothyroidism  
 Hypotonia Hypoventilation Hypovitaminosis Hypoxia  
 Idiopathic thrombocytopenic purpura Ileus Ileus paralytic  
 Ill-defined disorder Illusion Immune system disorder  
 Impaired healing Inappropriate antidiuretic hormone secretion  
 Incontinence Increased appetite Induration Infarction  
 Infected cyst Infection Infestation Inflammation  
 Influenza Influenza like illness Inguinal hernia Initial  
 insomnia Injection site mass Injection site pain Injection  
 site reaction Inner ear disorder Insomnia Intention tremor  
 Intentional self-injury Intermittent claudication  
 Interstitial lung disease Intervertebral disc degeneration  
 Intervertebral disc disorder Intervertebral disc protrusion  
 Intervertebral discitis Intestinal functional disorder  
 Intestinal obstruction Intestinal perforation Intracranial  
 pressure increased Iron deficiency Iron deficiency anaemia  
 Irritability Irritable bowel syndrome Ischaemia  
 Ischaemic hepatitis Ischaemic stroke Jaundice Jaundice  
 cholestatic Joint contracture Joint effusion Joint range of motion

decreased Joint stiffness Joint swelling Judgement impaired  
Keratitis Keratoconjunctivitis sicca Keratopathy  
Ketoacidosis Ketosis Laboratory test abnormal  
Lacrimal disorderLacrimation increased Lactose intolerance  
Laryngeal cancer Laryngeal disorder Laryngeal neoplasm  
Laryngeal oedema Laryngitis Laryngospasm Left ventricular  
failure Leiomyoma Lens disorder Lenticular opacities  
Lenticular pigmentation Lethargy Leukaemia  
Leukocytosis Leukoderma Leukopenia Leukoplakia oral  
Libido decreased Libido increased Lichenoid keratosis Lip  
and/or oral cavity cancer Lip dry Lip swelling Lipoma  
Livedo reticularis Liver disorder Liver function test  
abnormal Liver injury Lividity Lobar pneumonia Localised  
infection Localised oedema Logorrhoea Loss of consciousness Loss  
of libido Lower respiratory tract infection Lung cancer metastatic  
Lung disorder Lung infiltrationLung neoplasm malignant  
Lymphadenitis Lymphadenopathy Lymphatic disorder  
Lymphocytic leukaemia Lymphocytosis Lymphoedema Lymphoma  
LymphopeniaMacular degeneration Macule MaculopathyMajor  
depression Malaise Male sexual dysfunction Malignant  
melanoma Mania Masked facies Mastitis Mediastinal disorder  
Megacolon Melaena Melanocytic naevus Memory impairment  
Meningitis Menopausal symptoms Menopause Menorrhagia  
Menstrual disorder Menstruation delayed Menstruation  
irregular Mental disabilityMental disorder Mental retardation  
Mental status changes Metabolic alkalosis Metastasis  
Metastatic neoplasm Metrorrhagia Micturition disorder  
Micturition urgency Middle ear disorder Middle ear  
effusion Middle insomnia Migraine with aura Migraine without  
aura Miosis Mitral valve incompetence Mobility decreased  
Monarthrititis MonocytosisMood swings Motion sickness Mouth  
ulceration Movement disorderMultiple myeloma Muscle atrophy  
Muscle contractions involuntary Muscle contracture  
Muscle enzyme increased Muscle relaxant therapy  
Muscle rigidity Muscle spasms Muscle tightness Muscle  
twitching Muscular weaknessMusculoskeletal chest pain  
Musculoskeletal discomfort Musculoskeletal disorder  
Musculoskeletal pain Musculoskeletal stiffness Myalgia  
Myasthenic syndrome Mydriasis Myelitis Myocardial  
infarction Myocardial ischaemia MyocarditisMyoclonus Myopathy  
Myopia Myositis Nail disorder Nail infection  
Narcolepsy Nasal congestion Nasal disorder Nasal dryness  
Nasal oedema Nasal polyps Nasopharyngitis Nausea  
Neck pain Necrosis Necrosis ischaemic Neoplasm  
malignant Neoplasm prostateNeoplasm recurrence Neoplasm skin  
Nephritis Nephrolithiasis Nephrotic syndrome Nerve root  
lesion Nervous system disorder NervousnessNeuralgia  
Neuritis Neurodermatitis Neurogenic bladder Neuroleptic  
malignant syndrome Neurological symptom Neuroma Neuropathy  
peripheral Neurosis NeutropeniaNeutrophil count decreased  
Neutrophil count increased Night sweats Nightmare  
Nocturia Nodal arrhythmia Nodule Normochromic  
normocytic anaemia Nuchal rigidity Nystagmus Obesity  
Obsessive thoughts ObstructionObstructive airways disorder  
Ocular hyperaemiaOculogyric crisisOedema Oedema peripheral

Oesophageal carcinoma Oesophageal disorder Oesophageal spasm  
 Oesophageal stenosis Oesophageal ulcer Oesophagitis  
 Oligomenorrhoea Oliguria Onychomycosis Opisthotonus  
 Oral candidiasis Oral neoplasm benign Oral pain Orchitis  
 noninfective Oropharyngeal discomfort Oropharyngeal pain  
 Oropharyngeal spasm Orthostatic hypotension  
 Osteoarthritis Osteoarthropathy Osteodystrophy  
 Osteomyelitis Osteonecrosis Osteopenia Osteoporosis  
 Otitis externa Otitis media Otitis media chronic  
 Ovarian cancer Ovarian cyst Pain Pain in extremity Pain  
 in jaw Pallor Palpitations Pancreatitis acute  
 Pancytopenia Panic attack Panic disorder Panic  
 disorder with agoraphobia Panic reaction Papilloma  
 Paraesthesia oral Paralysis Paranoia Parasomnia Paresis  
 Parkinsonian gait Parkinsonism Paronychia Parosmia  
 Parotid gland enlargement Pathological fracture  
 Pathological gambling Pelvic pain Penis disorder Peptic  
 ulcer Pericardial effusion Pericarditis constrictive Perineal  
 pain Periodontitis Periorbital oedema Peripheral coldness  
 Peripheral ischaemia Peripheral vascular disorder Peritoneal  
 adhesions Personality disorder Petechiae Petit mal epilepsy  
 Phaeochromocytoma Pharyngeal erythema Pharyngitis Phlebitis  
 Phlebitis superficial Phobia Phonological disorder  
 Photophobia Photopsia Photosensitivity allergic reaction  
 Photosensitivity reaction Pigmentation disorder  
 Piloerection Pituitary tumour benign Plasmacytoma  
 Platelet count decreased Pleural disorder Pleural effusion  
 Pleural fibrosis Pleurisy Pneumonia Pneumonia aspiration  
 Pneumothorax Poisoning Poliomyelitis Pollakiuria  
 Polyarteritis nodosa Polycythaemia Polydipsia Polymyalgia  
 rheumatica Polyp Polyuria Post procedural infection  
 Postmenopausal haemorrhage Postural orthostatic tachycardia  
 syndrome Posture abnormal Pre-eclampsia Precocious puberty  
 Pregnancy test false positive Pregnancy test positive  
 Premature ejaculation Premenstrual syndrome Presyncope  
 Priapism Proctalgia Productive cough Prolactinoma  
 Prostate cancer Prostatic adenoma Prostatic disorder  
 Prostatitis Protein urine present Proteinuria Protrusion tongue  
 Prurigo Pruritus Pruritus generalised Pruritus genital  
 Pseudolymphoma Psoriasis Psychiatric symptom Psychomotor  
 retardation Psychotic behaviour Psychotic disorder Puberty  
 Pulmonary congestion Pulmonary embolism Pulmonary  
 fibrosis Pulmonary hypertension Pulmonary oedema Purpura  
 Purpura non-thrombocytopenic Pyelonephritis Pyoderma  
 Pyuria Rales Rash erythematous Rash generalised Rash  
 maculo-papular Rash papular Rash pustular Rash vesicular  
 Raynaud's phenomenon Rectal cancer Rectal haemorrhage  
 Rectal tenesmus Red blood cell count decreased Red blood  
 cell sedimentation rate increased Reflux oesophagitis Regressive  
 behaviour Regurgitation Renal artery stenosis Renal colic Renal  
 cyst Renal failure acute Renal impairment Renal neoplasm Renal  
 pain Respiratory alkalosis Respiratory arrest Respiratory  
 disorder Respiratory distress Respiratory failure Respiratory  
 tract congestion Respiratory tract infection Respiratory tract  
 infection viral Restless legs syndrome Retching Retinal artery

occlusion Retinal detachment Retinal disorder Retinal vascular  
disorder Retinitis pigmentosa Retrograde ejaculation  
Retroperitoneal fibrosis Rhabdomyolysis Rheumatoid  
arthritis Rhinitis Rhinitis allergic Rhinitis seasonal Rhinorrhoea  
Rhonchi Rosacea Rotator cuff syndrome Sacroiliitis  
Saliva altered Salivary duct obstruction Salivary gland  
disorder Salivary gland enlargement Salivary hypersecretion  
Salpingitis Sarcoidosis Sarcoma Scab Schizoaffective  
disorder Schizophrenia Schizophreniform disorder Sciatica  
Scleral disorder Scotoma Seasonal allergy Seborrhoeic  
dermatitis Seborrhoeic keratosis Sedation Sensation of heaviness  
Sensory disturbance Sensory loss Sepsis Septic  
shock Severe acute respiratory syndrome Sexual dysfunction Shock  
Sialoadenitis Sicca syndrome Sick sinus syndrome Sinus  
arrhythmia Sinus bradycardia Sinus congestion Sinus disorder Sinus  
headache Sinus tachycardia Sinusitis Skin burning sensation Skin  
cancer Skin discoloration Skin disorder Skin exfoliation  
Skin hyperpigmentation Skin hypertrophy Skin infection Skin  
irritation Skin lesion Skin mass Skin odour abnormal Skin  
papilloma Skin ulcer Sleep apnoea syndrome Sleep attacks Sleep  
disorder Sleep talking Sluggishness Small intestinal  
obstruction Sneezing Snoring Social avoidant behaviour  
Somnambulism Somnolence Speech disorder Spinal  
osteoarthritis Spine malformation Splenomegaly Spondylitis  
Squamous cell carcinoma Status epilepticus Stevens-  
Johnson syndrome Sticky skin Stomatitis Stress Stridor  
Stupor Subarachnoid haemorrhage Subcutaneous abscess  
Subcutaneous nodule Subdural haematoma Sudden death  
Suicidal ideation Suicide attempt Superior sagittal sinus  
thrombosis Supraventricular extrasystoles Supraventricular  
tachycardia Surgery Suspiciousness Swelling Swelling face  
Swollen tongue Syncope Synostosis Synovitis Systemic  
lupus erythematosus Tachycardia Tachypnoea Tardive dyskinesia  
Tenderness Tendonitis Tenosynovitis Tension Tension  
headache Terminal insomnia Testicular disorder Testicular pain  
Testicular swelling Tetany Therapeutic response  
decreased Therapeutic response increased Thinking abnormal  
Thirst Thought blocking Throat irritation Throat tightness  
Thrombocytopenia Thrombocytopenic purpura Thrombocytosis  
Thrombophlebitis Thrombosis Thrombotic thrombocytopenic  
purpura Thyroid adenoma Thyroid cancer Thyroid neoplasm  
Thyroiditis Tic Tinnitus Tongue discoloration Tongue  
disorder Tongue dry Tongue oedema Tongue paralysis Tongue  
spasm Tongue ulceration Tonsillar hypertrophy Tonsillitis Tooth  
abscess Tooth disorder Tooth impacted Tooth infection  
Toothache Torsade de pointes Torticollis Toxic epidermal  
necrolysis Tracheobronchitis Transaminases increased Transient  
ischaemic attack Tremor Trismus Tuberculin test positive  
Tubulointerstitial nephritis Ulcer Ulcer haemorrhage Umbilical  
hernia Unevaluable event Unintended pregnancy Unresponsive to  
stimuli Upper respiratory tract infection Upper-airway cough  
syndrome Urethral disorder Urethral pain Urethritis Urinary  
hesitation Urinary incontinence Urinary retention Urinary tract  
disorder Urinary tract infection Urine abnormality Urine  
analysis abnormal Urine output increased Urosepsis Urticaria



Uterine disorder Uterine haemorrhage Uterine leiomyoma  
 Uterine neoplasm Uterovaginal prolapse VIIIth nerve paralysis  
 Vaginal discharge Vaginal haemorrhage Vaginal infection  
 Vaginal inflammation Varicose vein Vascular purpura  
 Vasculitis Vasoconstriction Vasodilation procedure Vasospasm  
 Vein disorder Venous thrombosis Ventricular arrhythmia  
 Ventricular extrasystoles Ventricular failure Ventricular  
 fibrillation Ventricular hypertrophy Ventricular  
 tachycardia Vertigo Vestibular ataxia Vestibular disorder Viral  
 diarrhoea Viral infection Vision blurred Visual acuity reduced  
 Visual impairment Vitamin B12 deficiency Vitreous detachment  
 Vitreous floaters Vocal cord paralysis Vomiting  
 Vulvovaginal candidiasis Vulvovaginal dryness  
 Vulvovaginal mycotic infection Vulvovaginal pruritus  
 Vulvovaginitis Water intoxication Weight decreased  
 Weight fluctuation Weight increased Wheezing White blood  
 cell count decreased White blood cell count increased White blood  
 cells urine positive Withdrawal bleed Withdrawal syndrome Wound  
 infection Xerophthalmia Xerosis Yawning

\*\*\*\*\*  
 \*\*\*\*\*

Gamma-aminobutyric-acid receptor subunit beta-2 - Group: Channel

Treated with:

lorazepam: approved small molecule (126 associated side effects) For the management of anxiety disorders, and for treatment of status epilepticus.

ethchlorvynol: illicit, approved small molecule (0 associated side effects) Used for short-term hypnotic therapy in the management of insomnia for periods of up to one week in duration; however, this medication generally has been replaced by other sedative-hypnotic agents.

temazepam: approved small molecule (35 associated side effects) For the short-term treatment of insomnia (generally 7-10 days).

clobazam: illicit, approved small molecule (58 associated side effects) For treatment and management of epilepsy and anxiety disorder.

alprazolam: illicit, approved small molecule (178 associated side effects) For the management of anxiety disorder or the short-term relief of symptoms of anxiety and for the treatment of panic disorder, with or without agoraphobia.

chlordiazepoxide: illicit, approved small molecule (20 associated side effects) For the management of anxiety disorders or for the short-term relief of symptoms of anxiety, withdrawal symptoms of acute alcoholism, and preoperative apprehension and anxiety.

adinazolam: approved small molecule (0 associated side effects) For the treatment of anxiety and status epilepticus.

clorazepate: illicit, approved small molecule (0 associated side effects) For the management of anxiety disorders or for the short-term relief of the symptoms of anxiety. Also used as adjunctive therapy in the management of partial seizures and for the symptomatic relief of acute alcohol withdrawal.

midazolam: illicit, approved small molecule (119 associated side effects) For use as a sedative perioperatively.

flurazepam: illicit, approved small molecule (62 associated side effects) For short-term and intermittent use in patients with recurring insomnia and poor sleeping habits

halazepam: illicit, approved small molecule (0 associated side effects) Used to relieve anxiety, nervousness, and tension associated with anxiety disorders.

propofol: approved small molecule (163 associated side effects) Used for induction and/or maintenance of anaesthesia and for management of refractory status epilepticus.

diazepam: illicit, approved small molecule (149 associated side effects) Used in the treatment of severe anxiety disorders, as a hypnotic in the short-term management of insomnia, as a sedative and premedicant, as an anticonvulsant, and in the management of alcohol withdrawal syndrome.

oxazepam: approved small molecule (36 associated side effects) For the treatment of anxiety disorders and alcohol withdrawal.

triazolam: illicit, approved, withdrawn small molecule (66 associated side effects) For the short-term treatment of insomnia.

clonazepam: illicit, approved small molecule (228 associated side effects) Used as an anticonvulsant in the treatment of the Lennox-Gastaut syndrome (petit mal variant), akinetic and myoclonic seizures.

estazolam: illicit, approved small molecule (131 associated side effects) For the short-term management of insomnia characterized by difficulty in falling asleep, frequent nocturnal awakenings, and/or early morning awakenings.

ginkgo biloba: approved, nutraceutical small molecule (0 associated side effects) Appears to be effective in: alleviating age-related memory impairment in some elderly people with mild to moderate age-related memory or cognitive impairment; improving cognitive function in healthy young to middle-aged people; improving symptoms of Alzheimer's, vascular or mixed dementia; improving damage to the visual field in patients with normal tension glaucoma; decreasing the number of painful attacks in patients with Raynaud's syndrome; and may improve symptoms of vertigo and dizziness in some patients.

bromazepam: illicit, approved small molecule (47 associated side effects) For the short-term treatment of insomnia, short-term treatment of anxiety or panic attacks, if a benzodiazepine is required, and the alleviation of the symptoms of alcohol- and opiate-withdrawal.

clotiazepam: illicit, approved small molecule (0 associated side effects) For the treatment of anxiety disorders.

fludiazepam: illicit, approved small molecule (0 associated side effects) Used for the short-term treatment of anxiety disorders.

prazepam: illicit, approved small molecule (0 associated side effects) For the treatment of anxiety disorders.

cinolazepam: approved small molecule (0 associated side effects) For the management of anxiety disorders or for the short-term relief of the symptoms of anxiety or anxiety associated with depressive symptoms.

nitrazepam: approved small molecule (44 associated side effects) Used to treat short-term sleeping problems (insomnia), such as

difficulty falling asleep, frequent awakenings during the night, and early-morning awakening.

fospropofol: approved small molecule (0 associated side effects) Used for induction and/or maintenance of anaesthesia and for management of refractory status epilepticus.

528 known side effects mediated through drugs targeting this protein:

Abdominal discomfort Abdominal distension Abdominal pain  
Abnormal dreams Abnormal faeces Acidosis Acne Acute  
coronary syndrome Affect lability Ageusia Aggression Agitation  
Agranulocytosis Akathisia Akinesia Alcohol poisoning  
Alopecia Altered state of consciousness Amblyopia  
Amnesia Anaemia Anaphylactic shock Anaphylactoid  
reaction Anger Angioedema Angiopathy Anorectal discomfort  
Anorectal disorder Anterograde amnesia Anxiety  
Aortic dissection Apathy Aphonia Apnoea Appetite  
disorder Arrhythmia Arrhythmia supraventricular Arterial spasm  
Arthralgia Arthritis Aspartate aminotransferase increased  
Aspiration Asthenia Asthma Ataxia Athetosis  
Atrial fibrillation Atrioventricular block Back pain  
Balance disorder Bladder dysfunction Bladder pain  
Blindness Blood alkaline phosphatase increased Blood  
bilirubin increased Blood creatinine increased Blood disorder  
Blood glucose decreased Blood thromboplastin decreased  
Blood urea increased Body temperature decreased Body  
temperature increased Borderline personality disorder Bradycardia  
Bradyphrenia Brain oedema Breast disorder Breast pain  
Breast swelling Bronchitis Bronchospasm Bundle branch  
block Candidiasis Carbon dioxide increased Cardiac arrest  
Cardiac disorder Cardiac failure Cardiac fibrillation  
Cardiac output decreased Cardio-respiratory arrest  
Cardiovascular disorder Cellulitis Cerebellar syndrome  
Chest discomfort Chest pain Chills Choking sensation  
Chorea Chromaturia Clonic convulsion Clonus Clumsiness  
Coagulopathy Cognitive disorder Coma Completed suicide  
Confusional state Conjunctival hyperaemia Connective tissue  
disorder Constipation Conversion disorder Convulsion  
Coordination abnormal Cough Cyanosis Cystitis Cystitis  
noninfective Cytolytic hepatitis Deafness Death Decreased  
appetite Dehydration Delirium Delirium tremens Delusion  
Dependence Depersonalisation Depressed level of consciousness  
Depressed mood Depression Depressive symptom  
Derealisation Dermatitis Dermatitis contact Dermatitis  
exfoliative Diarrhoea Diplopia Discomfort Disinhibition  
Disorientation Disturbance in attention Disturbance in  
sexual arousal Dizziness Drooling Drug abuse Drug dependence  
Drug effect increased Drug eruption Drug intolerance Drug  
withdrawal convulsions Dry mouth Dry skin Dysaesthesia  
Dysarthria Dysgeusia Dyskinesia Dysmenorrhoea Dyspepsia  
Dysphagia Dysphonia Dysphoria Dyspnoea Dysthymic  
disorder Dystonia Dysuria Ear infection Ear pain  
Ecchymosis Effusion Ejaculation delayed Ejaculation  
failure Electrocardiogram ST segment Electrocardiogram ST segment  
depression Electrocardiogram abnormal Emotional disorder

Emotional distress      Emotional poverty      Encephalopathy  
 Encopresis      Endometrial sarcoma      Energy increased  
 Enterocolitis      Enuresis      Eosinophilia      Epilepsy  
 Epistaxis      Erectile dysfunction      Erythema      Erythema  
 multiforme      Euphoric mood      Extrapyrarnidal disorder  
 Extrasystoles      Eye disorder      Eye irritation      Eye  
 movement disorder      Eye pain      Eye swelling      Face oedema      Faecal  
 incontinence      Fatigue      Feeling abnormal      Feeling cold  
 Feeling drunk      Feeling hot      Feeling jittery      Feeling of body  
 temperature change      Flat affect      Flatulence      Floppy infant  
 Flushing      Fungal infection      Gait disturbance      Galactorrhoea  
 Gangrene      Gastric disorder      Gastritis      Gastrointestinal  
 disorder      Gastrointestinal haemorrhage      Gastrointestinal pain  
 Gingival pain      Glossitis      Glossodynia      Gout      Grand mal  
 convulsion      Gynaecomastia      Haematoma      Haematuria      Haemoglobin  
 Haemoglobin decreased      Haemorrhage      Haemorrhage urinary tract  
 Haemorrhoids      Hallucination      Hangover      Headache  
 Hearing impaired      Heart rate irregular      Hemiparesis      Hepatic  
 enzyme increased      Hepatic failure      Hepatic function abnormal  
 Hepatitis      Hepatocellular injury      Hepatomegaly      Herpes  
 simplex      Herpes virus infection      Hiccups      Hirsutism      Homicidal  
 ideation      Hordeolum      Hostility      Hunger      Hyperaemia      Hypercapnia  
 Hyperglycaemia      Hyperhidrosis      Hyperkalaemia  
 Hyperkinesia      Hyperlipidaemia      Hyperprolactinaemia  
 Hypersensitivity      Hypersomnia      Hypertension      Hypertonia  
 Hyperventilation      Hypoaesthesia      Hypochromic anaemia  
 Hypokalaemia      Hypokinesia      Hypomagnesaemia      Hypomania  
 Hyponatraemia      Hypopnoea      Hyporeflexia      Hypotension  
 Hypothermia      Hypotonia      Hypoventilation      Hypoxia      Ileus Ill-  
 defined disorder      Illusion      Inappropriate antidiuretic hormone  
 secretion      Incontinence      Increased appetite      Induration  
 Infarction      Infection      Infectious mononucleosis      Infestation  
 Inflammation      Influenza      Injection site pain      Injection  
 site reaction      Insomnia      Intracranial pressure increased  
 Intraocular pressure increased      Irritability      Ischaemia  
 Jaundice      Joint swelling      Laryngitis      Laryngospasm  
 Lethargy      Leukocytosis      Leukopenia      Libido decreased  
 Libido increased      Liver function test abnormal      Liver injury  
 Local reaction      Logorrhoea      Loss of consciousness      Loss of  
 libido      Lung disorder      Lymphadenopathy      Major depression  
 Malaise      Mania      Mean arterial pressure      Mediastinal disorder  
 Melaena      Memory impairment      Menstrual disorder  
 Menstruation irregular      Mental disability      Mental disorder  
 Mental retardation      Metabolic acidosis      Micturition  
 disorder      Micturition urgency      Migraine      Miosis      Moaning  
 Mood swings      Motion sickness      Movement disorder      Muscle relaxant  
 therapy      Muscle rigidity      Muscle spasms      Muscle spasticity  
 Muscle twitching      Muscular weakness      Musculoskeletal discomfort  
 Musculoskeletal disorder      Musculoskeletal stiffness  
 Myalgia      Mydriasis      Myocardial infarction      Myocardial  
 ischaemia      Myoclonus      Nasal congestion      Nasopharyngitis      Nausea  
 Neck pain      Necrosis      Neonatal disorder      Nervous system  
 disorder      Nervousness      Neuritis      Neuroleptic malignant syndrome  
 Neuropathy peripheral      Neutropenia      Nightmare      Nocturia      Nodal  
 arrhythmia      Nodal rhythm      Nodule      Nuchal rigidity      Nystagmus

Obstruction Obstructive airways disorder Oedema Oedema  
 peripheral Oliguria Opisthotonus Oropharyngeal pain  
 Orthostatic hypotension Osteoarthritis Otitis media  
 Pain Pain in extremity Pain in jaw Pallor Palpitations  
 Pancreatitis Pancytopenia Paraesthesia  
 Paraesthesia oral Paralysis Paresis Pelvic pain Penile  
 discharge Pericardial effusion Periorbital oedema Personality  
 disorder Phaeochromocytoma Pharyngitis Phlebitis Photophobia  
 Photosensitivity reaction Pigmentation disorder Platelet  
 count decreased Pleurisy Pneumonia Pneumothorax Pollakiuria  
 Polyuria Post-traumatic stress disorder Precocious  
 puberty Premenstrual syndrome Presyncope Proctalgia Prothrombin  
 level increased Pruritus Psychomotor retardation Psychotic  
 disorder Puberty Pulmonary congestion Pulmonary function  
 test decreased Pulmonary haemorrhage Pulmonary hypertension  
 Pulmonary oedema Purpura Rash Rash maculo-papular  
 Rectal haemorrhage Rectal tenesmus Renal failure  
 Respiratory acidosis Respiratory arrest Respiratory  
 depression Respiratory disorder Respiratory failure Respiratory  
 moniliasis Respiratory rate decreased Respiratory tract congestion  
 Respiratory tract infection Retching Retrograde amnesia  
 Rhabdomyolysis Rhinitis allergic Rhinorrhoea Rhonchi Right  
 ventricular failure Salivary hypersecretion Scotoma  
 Sedation Sepsis Sexual dysfunction Shock Sinus  
 tachycardia Sinusitis Skin burning sensation Skin discolouration  
 Skin disorder Skin exfoliation Skin necrosis Sleep  
 apnoea syndrome Sleep disorder Sleep talking Sluggishness  
 Sneezing Somnambulism Somnolence Speech disorder  
 Stevens-Johnson syndrome Stomatitis Strabismus Stridor  
 Stupor Substance abuse Suicidal ideation Supraventricular  
 extrasystoles Supraventricular tachycardia Swelling Swelling  
 face Swollen tongue Syncope Tachycardia Tachypnoea Tenderness  
 Tendonitis Tension Therapeutic response decreased  
 Thinking abnormal Thirst Thrombocytopenia Thrombocytosis  
 Thrombophlebitis Thrombosis Thyroid neoplasm Tinnitus  
 Tongue coated Tongue disorder Tongue oedema Tooth  
 disorder Toothache Toxic epidermal necrolysis Transaminases  
 increased Tremor Tropical spastic paresis Ulcer Upper  
 airway obstruction Upper respiratory tract infection Urethral  
 disorder Urinary hesitation Urinary incontinence Urinary  
 retention Urinary tract disorder Urinary tract infection Urine  
 abnormality Urine colour abnormal Urine output increased Urticaria  
 Vaginal discharge Vaginal infection Vaginal inflammation  
 Vascular purpura Vasodilation procedure Venous thrombosis  
 Ventricular arrhythmia Ventricular extrasystoles Ventricular  
 fibrillation Ventricular tachycardia Vertigo Viral  
 infection Vision blurred Visual acuity reduced Visual impairment  
 Vomiting Weight decreased Weight increased Wheezing  
 Withdrawal syndrome Xeroderma Xerophthalmia Yawning

\*\*\*\*\*  
 \*\*\*\*\*

Alpha platelet-derived growth factor receptor - Group: Enzyme

Treated with:

becaplermin: approved biotech (0 associated side effects)  
 For topical treatment of skin ulcers (from diabetes)

imatinib: approved small molecule (248 associated side effects) For the treatment Philadelphia chromosome positive chronic myeloid leukemia (CML) and malignant gastrointestinal stromal tumors (GIST).

sunitinib: approved small molecule (198 associated side effects) For the treatment of advanced renal cell carcinoma as well as the treatment of gastrointestinal stromal tumor after disease progression on or intolerance to imatinib mesylate.

357 known side effects mediated through drugs targeting this protein:

Abdominal discomfort Abdominal distension Abdominal pain  
Abdominal pain upper Acute coronary syndrome Acute febrile neutrophilic dermatosis Acute generalised exanthematous pustulosis Acute hepatic failure Adrenal insufficiency Ageusia  
Alanine aminotransferase increased Alopecia Alveolar proteinosis Anaemia Angioedema Angiopathy Anxiety Aortic dissection Aphagia Aphthous stomatitis Aplastic anaemia  
Apoptosis Arrhythmia Arthralgia Ascites Aspartate aminotransferase increased Assisted fertilisation Asthenia Back pain Blindness Blindness cortical Blister Blood albumin decreased Blood alkaline phosphatase increased Blood amylase increased Blood bilirubin increased Blood creatine phosphokinase increased Blood creatinine increased Blood disorder Blood glucose decreased Blood glucose increased Blood lactate dehydrogenase increased Blood magnesium decreased Blood phosphorus decreased Blood potassium decreased Blood potassium increased Blood sodium increased Blood thyroid stimulating hormone increased Blood urea increased Blood uric acid increased Body temperature increased Bone marrow necrosis Bone pain Bradycardia  
Brain oedema Breast enlargement Breast feeding  
Calcinosis Cardiac disorder Cardiac failure Cardiac failure congestive Cardiac hypertrophy Cardiac tamponade Cardiogenic shock  
Cardiomyopathy Cell death Cerebral haemorrhage Cerebral infarction Cerebrovascular accident Chest pain Chills  
Colitis Confusional state Congenital skin disorder  
Conjunctival haemorrhage Conjunctivitis Connective tissue disorder Constipation Convulsion Cough Cytogenetic abnormality Death Decreased appetite Deep vein thrombosis  
Dehydration Delirium tremens Depressed mood Dermatitis bullous Dermatitis exfoliative Dermatitis psoriasiform  
Diarrhoea Discomfort Disease progression Diverticulitis  
Dizziness Drug interaction Dry eye Dry mouth Dry skin  
Dysgeusia Dyspepsia Dyspnoea exertional Ecchymosis  
Effusion Ehlers-Danlos syndrome Ejection fraction Ejection fraction decreased Electrocardiogram PR interval Embolism  
Eosinophilia Epistaxis Erythema Erythema multiforme  
Eye disorder Eye oedema Face oedema Fatigue Febrile neutropenia Feeling abnormal Feeling cold Fibrosis Fistula  
Flank pain Flatulence Fluid retention Flushing Gastric haemorrhage Gastric ulcer Gastritis Gastroenteritis  
Gastrointestinal disorder Gastrointestinal haemorrhage  
Gastrointestinal neoplasm Gastrointestinal pain  
Gastrointestinal perforation Gastrointestinal tract irritation  
Gastrooesophageal reflux disease Generalised oedema

Gingival pain      Gingivitis      Glaucoma      Glossitis      Glossodynia  
 Gout      Gynaecomastia      Haematemesis      Haematochezia  
 Haematological malignancy      Haematoma      Haematuria      Haemoglobin  
 Haemoglobin decreased      Haemoptysis      Haemorrhage      Haemorrhoids  
 Hair colour changes      Headache      Hepatic enzyme increased  
 Hepatic failure      Hepatic necrosis      Hepatitis      Herpes simplex  
 Herpes virus infection      Herpes zoster      Hypercalcaemia  
 Hyperglycaemia      Hyperhidrosis      Hyperkalaemia  
 Hypernatraemia      Hyperplasia      Hypersensitivity      Hypertension  
 Hyperthyroidism      Hypertrophy      Hyperuricaemia      Hypoalbuminaemia  
 Hypocalcaemia      Hypogeusia      Hypoglycaemia      Hypokalaemia  
 Hyponatraemia      Hypophosphataemia      Hypotension      Hypothyroidism  
 Ileus      Immunosuppression      Infarction      Infection      Infestation  
 Inflammation      Influenza      Influenza like illness      Insomnia  
 Interstitial lung disease      Intestinal obstruction  
 Intracranial pressure increased      Ischaemia      Jaundice      Joint  
 swelling      Lacrimation increased      Left ventricular dysfunction  
 Leukoderma      Leukoencephalopathy      Leukopenia      Lipase increased  
 Liver disorder      Loss of consciousness      Lower respiratory  
 tract infection      Lung neoplasm malignant      Lymphoma      Lymphopenia  
 Macular oedema      Malaise      Mastocytic leukaemia      Mastocytoma  
 Mediastinal disorder      Melaena      Memory impairment      Menorrhagia  
 Mental disorder      Metastasis      Metastatic neoplasm  
 Metrorrhagia      Microangiopathy      Migraine      Mouth ulceration  
 Mucosal dryness      Mucosal inflammation      Muscle spasms  
 Musculoskeletal discomfort      Musculoskeletal disorder  
 Musculoskeletal pain      Musculoskeletal stiffness      Myalgia  
 Myelodysplastic syndrome      Myeloproliferative disorder  
 Myocardial ischaemia      Myopathy      Nail disorder  
 Nasopharyngitis      Nausea      Necrosis      Necrosis ischaemic  
 Neoplasm malignant      Nephropathy      Nephropathy toxic      Nephrotic  
 syndrome      Nervous system disorder      Neuropathy peripheral  
 Neutropenia      Night sweats      Obstruction      Oedema      Oedema  
 peripheral      Oesophagitis      Opportunistic infection      Optic  
 neuritis      Oral pain      Oropharyngeal discomfort      Oropharyngeal  
 pain      Osteonecrosis      Ovarian disorder      Pain      Pain in extremity  
 Pancreatic disorder      Pancreatitis      Pancytopenia  
 Papilloedema      Papilloma      Paraesthesia      Parity  
 Pericardial effusion      Pericarditis      Periorbital oedema  
 Peripheral coldness      Petechiae      Pharyngitis      Photosensitivity  
 reaction      Pigmentation disorder      Platelet count decreased  
 Pleural disorder      Pleural effusion      Pneumonia      Pollakiuria  
 Posterior reversible encephalopathy syndrome      Primary  
 hypothyroidism      Protein urine present      Proteinuria      Prurigo  
 Pruritus      Psoriasis      Pulmonary embolism      Pulmonary  
 fibrosis      Pulmonary haemorrhage      Pulmonary oedema      Purpura      Rash  
 erythematous      Rash follicular      Rash papular      Rash vesicular  
 Reflux oesophagitis      Regressive behaviour      Renal failure  
 Renal failure acute      Renal impairment      Renal tubular disorder  
 Respiratory tract infection      Retinal haemorrhage  
 Rhabdomyolysis      Rhinitis      Sciatica      Sepsis      Sexual  
 dysfunction      Sexually active      Shock      Sinusitis      Skin discolouration  
 Skin disorder      Social avoidant behaviour      Somnolence  
 Splinter haemorrhages      Stomatitis      Swelling      Syncope  
 Systemic mastocytosis      Tachycardia      Tenderness      Testicular

disorder   Thrombocytopenia   Thrombosis   Thrombotic microangiopathy  
Thyroid disorder   Thyroiditis   Tinnitus   Tongue ulceration   Toxic  
epidermal necrolysis   Transient ischaemic attack   Tumour lysis  
syndrome   Tumour necrosis   Ulcer   Upper respiratory tract infection  
Vaginal discharge   Varicella   Vascular purpura   Venous thrombosis  
Ventricular dysfunction   Vertigo   Viral infection  
Vision blurred   Visual acuity reduced   Visual impairment  
Vitreous haemorrhage   Vomiting   Weight decreased   Weight  
increased   Wound haemorrhage   Yellow skin

\*\*\*\*\*  
\*\*\*\*\*

Solute carrier organic anion transporter family member 1C1 - Group:  
Transporter

Treated with:

phenytoin: approved   small molecule   (247 associated side effects)   For the control of generalized tonic-clonic (grand mal) and complex partial (psychomotor, temporal lobe) seizures and prevention and treatment of seizures occurring during or following neurosurgery.

liothyronine: approved   small molecule   (0 associated side effects)   Used as replacement or supplemental therapy in patients with hypothyroidism of any etiology, except transient hypothyroidism during the recovery phase of subacute thyroiditis.

conjugated estrogens: approved   small molecule   (219 associated side effects)   For the treatment of moderate to severe vasomotor symptoms associated with the menopause, atrophic vaginitis, osteoporosis, hypoestrogenism due to hypogonadism, castration, primary ovarian failure, breast cancer (for palliation only), and Advanced androgen-dependent carcinoma of the prostate (for palliation only)

digoxin: approved   small molecule   (56 associated side effects)   For the treatment and management of congestive cardiac insufficiency, arrhythmias and heart failure.

levothyroxine: approved   small molecule   (0 associated side effects)   For use alone or in combination with antithyroid agents to treat hypothyroidism, goiter, chronic lymphocytic thyroiditis, myxedema coma, and stupor.

methotrexate: approved   small molecule   (209 associated side effects)   For the treatment of gestational choriocarcinoma, chorioadenoma destruens and hydatidiform mole. Also for the treatment of severe psoriasis and severe, active, classical or definite rheumatoid arthritis.

diclofenac: approved   small molecule   (310 associated side effects)   For the acute and chronic treatment of signs and symptoms of osteoarthritis and rheumatoid arthritis.

dinoprostone: approved   small molecule   (0 associated side effects)   For the termination of pregnancy during the second trimester (from the 12th through the 20th gestational week as calculated from the first day of the last normal menstrual period), as well as for evacuation of the uterine contents in the management of missed abortion or intrauterine fetal death up to 28 weeks of gestational age as calculated from the first day of the last normal menstrual period. Also used in the management of nonmetastatic gestational trophoblastic disease (benign hydatidiform mole). Other indications include improving the cervical inducibility (cervical



"ripening") in pregnant women at or near term with a medical or obstetrical need for labor induction, and the management of postpartum hemorrhage.

meclofenamic acid: approved small molecule (0 associated side effects) For the relief of mild to moderate pain, for the treatment of primary dysmenorrhea and for the treatment of idiopathic heavy menstrual blood loss. Also for relief of the signs and symptoms of acute and chronic rheumatoid arthritis and osteoarthritis.

probenecid: approved small molecule (27 associated side effects) For the reduction of serum uric acid concentrations in chronic gouty arthritis and tophaceous gout in patients with frequent disabling gout attacks. Has also been effectively used to promote uric acid excretion in hyperuricemia secondary to the administration of thiazide and related diuretics.

ouabain: approved small molecule (0 associated side effects) For the treatment of atrial fibrillation and flutter and heart failure

liotrix: approved small molecule (0 associated side effects) May be used to treat primary, secondary or tertiary hypothyroidism. May also be used to suppress thyroid stimulating hormone (TSH) secretion in patients with simple (nontoxic) goiter, subacute or chronic lymphocytic thyroiditis multinodular goiter, and in the management of thyroid cancer. May be used in conjunction with other antithyroid agents to treat thyrotoxicosis to prevent goitrogenesis and hypothyroidism. May also be used for differential diagnosis of suspected mild hyperthyroidism or thyroid gland autonomy.

taurocholic acid: experimental small molecule (0 associated side effects)

623 known side effects mediated through drugs targeting this protein:

5q minus syndrome  
Abdominal discomfort Abdominal distension  
Abdominal pain Abdominal pain upper Abscess Acidosis  
Acne Acute coronary syndrome Affect lability Ageusia  
Aggression Agitation Agranulocytosis Akathisia Alanine  
aminotransferase increased Albuminuria Alkalosis Alopecia  
Alveolitis Alveolitis allergic Amblyopia Amenorrhoea  
Amnesia Anaemia Anaemia megaloblastic Anaphylactic  
shock Anaphylactoid reaction Angina pectoris Angioedema Angiopathy  
Anorectal discomfort Anorectal disorder Anxiety  
Aortic dissection Apathy Aphasia Aphthous stomatitis  
Aplastic anaemia Apnoea Application site reaction  
Arrhythmia Arterial thrombosis Arteriosclerosis Arthralgia  
Arthropathy Aspartate aminotransferase increased Aspiration  
Asterixis Asthenia Asthma Ataxia Atelectasis  
Atrial flutter Atrial tachycardia Atrioventricular block  
complete Atrioventricular block first degree Atrioventricular  
block second degree Atrioventricular dissociation Atrophy  
Azoospermia Azotaemia Back pain Benign neoplasm Bladder  
pain Bleeding time prolonged Blindness Blindness transient  
Blister Blood albumin decreased Blood creatine  
phosphokinase increased Blood creatinine increased Blood  
glucose decreased Blood glucose increased Blood pressure

increased Blood triglycerides increased Blood uric acid  
 increased Body temperature increased Bone disorder Bone pain  
 Bradycardia Brain oedema Breast discharge Breast discomfort  
 Breast disorder Breast enlargement Breast mass Breast  
 neoplasm Breast pain Breast swelling Breast tenderness Breath  
 odour Bronchitis Bundle branch block Burning sensation Cachexia  
 Candidiasis Carbohydrate tolerance decreased Cardiac arrest  
 Cardiac disorder Cardiac failure Cardiac failure congestive  
 Cardiac fibrillation Cardiac flutter Cardioactive drug  
 level Cardiomegaly Cardiovascular disorder Cell death  
 Cerebral artery thrombosis Cerebral haemorrhage Cerebral  
 infarction Cerebral thrombosis Cerebrovascular accident  
 Cervical discharge Cervix disorder Chest pain Chills  
 Chloasma Chorea Cognitive disorder Colitis ischaemic  
 Colitis ulcerative Coma Conduction disorder Confusional  
 state Conjunctival hyperaemia Conjunctivitis Conjunctivitis  
 allergic Connective tissue disorder Constipation Convulsion  
 Coordination abnormal Corneal deposits Corneal disorder  
 Corneal erosion Corneal infiltrates Corneal oedema  
 Corneal opacity Coronary artery thrombosis Cough  
 Cryptococcosis Cyanosis Cystitis Cystitis noninfective  
 Cytolytic hepatitis Cytomegalovirus infection Deafness  
 Death Decreased appetite Deep vein thrombosis Dehydration  
 Delirium Dementia Dental caries Dental plaque  
 Depersonalisation Depressed level of consciousness Depression  
 Dermatitis bullous Dermatitis contact Dermatitis  
 exfoliative Diabetes insipidus Diabetes mellitus Diarrhoea  
 Diarrhoea haemorrhagic Diplopia Discomfort Disorientation  
 Dissociation Disturbance in attention Dizziness Drug  
 ineffective Drug interaction Drug rash with eosinophilia and  
 systemic symptoms Dry eye Dry mouth Dry skin Dysarthria  
 Dysgeusia Dyskinesia Dysmenorrhoea Dyspepsia Dysphagia  
 Dysplasia Dyspnoea Dysthymic disorder Dystonia  
 Dysuria Ear pain Ecchymosis Ectropion of cervix  
 Eczema Effusion Electrocardiogram PR prolongation  
 Electrocardiogram ST segment Electrocardiogram ST segment  
 depression Electrocardiogram change Embolism Embolism venous  
 Encephalitis Encephalopathy Endometrial cancer  
 Endometrial hypertrophy Endometriosis Enteritis  
 Enterocolitis haemorrhagic Eosinophilia Epilepsy  
 Epistaxis Erectile dysfunction Eructation Erythema  
 Erythema multiforme Erythema nodosum Erythema of eyelid  
 Extensor plantar response Extrapyrarnidal disorder  
 Extrasystoles Extravasation Eye allergy Eye disorder  
 Eye inflammation Eye irritation Eye pain Eye pruritus  
 Eyelid oedema Eyelids pruritus Face oedema Fatigue  
 Febrile neutropenia Feeling abnormal Fibrocystic breast  
 disease Fibrosis Flat affect Flatulence Fluid retention  
 Flushing Folliculitis Furuncle Gait disturbance  
 Galactorrhoea Gallbladder disorder Gastric pH decreased  
 Gastritis Gastroenteritis Gastrointestinal disorder  
 Gastrointestinal haemorrhage Gastrointestinal necrosis  
 Gastrointestinal pain Gastrointestinal toxicity Generalised  
 oedema Genital discharge Gingival hyperplasia Gingival pain  
 Gingivitis Glossitis Glucose tolerance decreased Glucose

tolerance impaired Gout Gynaecomastia Haemangioma  
Haematemesis Haematocrit decreased Haematoma Haematuria  
Haemoglobin Haemolytic anaemia Haemoptysis Haemorrhage  
Haemorrhagic disorder Haemorrhoids Hair disorder  
Hallucination Headache Hearing impaired Hemiparesis  
Hemiplegia Henoch-Schonlein purpura Hepatic cirrhosis  
Hepatic enzyme increased Hepatic failure Hepatic function  
abnormal Hepatic necrosis Hepatitis Hepatitis acute Hepatitis  
fulminant Hepatobiliary disease Hepatocellular injury Hepatorenal  
syndrome Hereditary disorder Hernia Herpes simplex  
Herpes virus infection Herpes zoster Hirsutism  
Histoplasmosis Hostility Hyperacusis Hyperaemia  
Hyperaesthesia Hyperbilirubinaemia Hypercalcaemia  
Hyperchlorhydria Hypercholesterolaemia Hyperglycaemia  
Hyperhidrosis Hyperkalaemia Hyperkinesia  
Hyperlipidaemia Hypernatraemia Hyperplasia Hyperreflexia  
Hypersensitivity Hypertension Hypertonia Hypertrichosis  
Hypertriglyceridaemia Hypertrophy Hyperuricaemia  
Hyperventilation Hypoaesthesia Hypocalcaemia Hypochromic  
anaemia Hypogammaglobulinaemia Hypoglycaemia Hypokalaemia  
Hypokinesia Hypophosphataemia Hyporeflexia Hypotension  
Hypothyroidism Hypotonia Hypoxia Ileus Ill-defined  
disorder Immune system disorder Incontinence Increased  
bronchial secretion Infarction Infection Infertility Infestation  
Inflammation Influenza Injection site pain Insomnia  
Interstitial lung disease Intestinal ischaemia Intestinal  
perforation Intra-uterine death Intracranial pressure increased  
Intraocular pressure increased Iritis Irritability  
Ischaemia Jaundice Jaundice cholestatic Keratitis  
Ketosis Lacrimal disorder Lacrimation increased Laryngeal  
oedema Laryngitis Laryngospasm Leiomyoma Lethargy  
Leukocytosis Leukoencephalopathy Leukopenia Lip  
swelling Liver function test abnormal Liver injury Loss of  
consciousness Loss of libido Lung disorder Lung infection  
Lymphadenopathy Lymphoma Lymphoproliferative disorder  
Macrocytosis Maculopathy Malaise Mass Melaena  
Memory impairment Meningioma benign Meningitis Meningitis  
aseptic Menorrhagia Menstrual disorder Mental disability  
Mental disorder Mesenteric vascular insufficiency  
Metrorrhagia Migraine Mood swings Mouth ulceration  
Muscle relaxant therapy Muscle rigidity Muscle spasms  
Muscle twitching Muscular weakness Musculoskeletal discomfort  
Musculoskeletal pain Musculoskeletal stiffness Myalgia  
Mydriasis Myocardial infarction Myoclonus Myopathy Nail  
disorder Nausea Neck pain Necrosis Neoplasm Neoplasm  
malignant Nephritis Nephropathy Nephrotic syndrome Nerve root  
lesion Nervous system disorder Nervousness Neuritis  
Neuropathy peripheral Neurosis Neutropenia Night blindness  
Nightmare Nipple pain Nocardiosis Nocturia Nodule  
Nuchal rigidity Nystagmus Obstruction Obstructive airways  
disorder Ocular hyperaemia Oedema genital Oedema peripheral  
Oesophageal disorder Oesophagitis Oliguria  
Opportunistic infection Optic neuritis Orthostatic  
hypotension Osteoarthritis Osteomalacia Osteonecrosis  
Osteoporosis Ovarian cancer Pain Pain in extremity

Palpitations Pancreatic disorder Pancreatitis  
 Pancytopenia Papule Paraesthesia oralParalysis  
 Paresis Parosmia Pelvic painPeptic ulcer Pericardial  
 effusion Pericarditis Personality disorder Petechiae  
 Pharyngitis Phlebitis Photophobia Photosensitivity reaction  
 Pigmentation disorder Pleural disorder Pleural effusion  
 Pneumocystis jiroveci pneumonia Pneumonia aspiration  
 Pneumonia cytomegaloviral Pneumothorax Poisoning  
 Pollakiuria Polyarteritis nodosa Polyneuropathy Polyuria  
 Porphyria Precocious puberty Proctalgia Proctitis  
 Productive cough Prostatic specific antigen increased  
 Protein urine present Proteinuria Pruritus Pruritus genital  
 Pseudolymphoma Psychotic disorder Puberty Pulmonary  
 embolism Pulmonary fibrosis Pulmonary function test decreased  
 Pulmonary oedema Pulmonary toxicity Punctate keratitis  
 Purpura Radiculopathy Rales Rash Rash generalised Rash  
 maculo-papular Rash morbilliformRash pustular Rectal  
 haemorrhageRectal tenesmus Renal colicRenal failure Renal  
 failure acute Renal impairment Renal papillary necrosis Renal  
 tubular disorder Respiratory depression Respiratory disorder  
 Respiratory failure Respiratory tract infection Retinal  
 vein thrombosis Retinitis pigmentosa Rhinitis Salivary  
 hypersecretion Scotoma Seborrhoeic dermatitis Sensory loss  
 Sepsis Shock Sinus bradycardiaSinusitis Skin burning  
 sensation Skin cancerSkin discolouration Skin exfoliation Skin  
 hypertrophySkin irritation Skin mass Skin necrosis Skin odour  
 abnormal Skin ulcer Sleep disorder Smear cervix abnormal  
 Social avoidant behaviour Soft tissue necrosis Somnolence  
 Speech disorder Spinal cord disorder Sputum increased  
 Stevens-Johnson syndrome Stomatitis Stupor  
 Subcutaneous nodule Subdural haematoma Sudden death  
 Swelling Syncope Systemic lupus erythematosus Tachycardia  
 Telangiectasia Tenderness Tension Testicular disorder  
 Thinking abnormalThirst Thrombocytopenia Thrombophlebitis  
 Thrombophlebitis superficialThrombosis Tic Tinnitus  
 Tongue coated Tongue disorder Tongue oedema Tooth  
 abscess Toxic epidermal necrolysis Tremor  
 Tubulointerstitial nephritis Tumour lysis syndrome Ulcer  
 Ulcerative keratitis Upper respiratory tract infection  
 Ureteric obstruction Urethral disorderUrethral pain  
 Urinary incontinence Urinary retentionUrinary tract disorder  
 Urine output increased Urticaria Uterine cancer Uterine  
 cervical erosion Uterine leiomyomaUterine spasm Vaginal discharge  
 Vaginal haemorrhage Vaginal infectionVaginal inflammation  
 Varicose vein Vascular purpura Vasculitis Vasodilation  
 procedure Venous thrombosisVentricular extrasystoles Ventricular  
 fibrillation Ventricular tachycardia Vertigo Viral  
 infection Vision blurred Visual acuity reduced Visual impairment  
 Vitreous floatersVomiting Vulvovaginal candidiasis  
 Vulvovaginal mycotic infection Vulvovaginal pruritus  
 Weight decreased Weight increased Withdrawal bleed X-linked  
 lymphoproliferative syndrome Xanthopsia

\*\*\*\*\*  
 \*\*\*\*\*

Parathyroid hormone/parathyroid hormone-related peptide receptor -  
Group: Receptor

Treated with:

preotact: approved biotech (0 associated side effects) For  
use/treatment in osteoporosis.

teriparatide: approved biotech (0 associated side effects)

For the treatment of osteoporosis in men and postmenopausal  
women who are at high risk for having a fracture. Also used to  
increase bone mass in men with primary or hypogonadal osteoporosis  
who are at high risk for fracture.

known side effects mediated through drugs targeting this protein:

\*\*\*\*\*  
\*\*\*\*\*

Small conductance calcium-activated potassium channel protein 3 -

Group: Channel

Treated with:

miconazole: approved small molecule (33 associated side effects)

For topical application in the treatment of tinea pedis  
(athlete&rsquo;s foot), tinea cruris, and tinea corporis caused  
by &lt;i>Trichophyton rubrum&/i>, &lt;i>Trichophyton  
mentagrophytes&/i>, and &lt;i>Epidermophyton  
floccosum&/i>, in the treatment of cutaneous candidiasis  
(moniliasis), and in the treatment of tinea versicolor.

33 known side effects mediated through drugs targeting this protein:

Abdominal pain Anaphylactic shock Anaphylactoid reaction  
Angioedema Breast disorder Burning sensationCardiac disorder  
Dermatitis Dermatitis contact Erythema Gastrointestinal  
pain Genital burning sensation Genital dischargeHeadache  
Immune system disorder Muscle spasms Nausea Nervous  
system disorder Oedema Pain Pelvic painPruritus genital Rash  
Respiratory disorder Respiratory tract infection Upper  
respiratory tract infection Urethral disorderUrinary tract disorder  
Urinary tract infection Urticaria Vaginal discharge  
Vulvovaginal discomfort Vulvovaginal erythema

\*\*\*\*\*  
\*\*\*\*\*

Triggering receptor expressed on myeloid cells 1 - Group: Receptor

Treated with:

d-tartaric acid: experimental small molecule (0 associated  
side effects)

known side effects mediated through drugs targeting this protein:

\*\*\*\*\*  
\*\*\*\*\*

5-hydroxytryptamine 7 receptor - Group: Receptor

Treated with:

eletriptan: approved small molecule (242 associated side  
effects) For the acute treatment of migraine with or without aura  
in adults.

ziprasidone: approved small molecule (251 associated side effects) For the treatment of schizophrenia and related psychotic disorders.

methysergide: approved small molecule (69 associated side effects) For the treatment of vascular headache

cabergoline: approved small molecule (96 associated side effects) For the treatment of hyperprolactinemic disorders, either idiopathic or due to prolactinoma (prolactin-secreting adenomas). May also be used to manage symptoms of Parkinsonian Syndrome as monotherapy during initial symptomatic management or as an adjunct to levodopa therapy during advanced stages of disease.

olanzapine: approved small molecule (393 associated side effects) For the acute and maintenance treatment of schizophrenia and related psychotic disorders, as well as acute treatment of manic or mixed episodes of bipolar 1 disorder. Intramuscular olanzapine is indicated for the rapid control of agitated patients.

clozapine: approved small molecule (228 associated side effects) For use in patients with treatment-resistant schizophrenia.

epinastine: approved small molecule (12 associated side effects) For the prevention of itching associated with allergic conjunctivitis.

bromocriptine: approved small molecule (120 associated side effects) For the treatment of galactorrhea due to hyperprolactinemia, prolactin-dependent menstrual disorders and infertility, prolactin-secreting adenomas, prolactin-dependent male hypogonadism, as adjunct therapy to surgery or radiotherapy for acromegaly or as monotherapy in special cases, as monotherapy in early Parkinsonian Syndrome or as an adjunct with levodopa in advanced cases with motor complications. Bromocriptine has also been used off-label to treat restless legs syndrome and neuroleptic malignant syndrome.

quetiapine: approved small molecule (359 associated side effects) For the treatment of schizophrenia and related psychotic disorders.

aripiprazole: approved small molecule (630 associated side effects) For the treatment of schizophrenia and related psychotic disorders.

amisulpride: approved small molecule (0 associated side effects) Investigated for use/treatment in schizophrenia and schizoaffective disorders, mania in bipolar disorder, and depression.

881 known side effects mediated through drugs targeting this protein:

Abasia      Abdominal discomfort      Abdominal distension      Abdominal pain  
 Abdominal pain lower      Abdominal pain upper      Abdominal tenderness  
 Abnormal dreams      Abnormal faeces      Abscess  
 Accommodation disorder      Acidosis      Acne      Acute coronary syndrome  
 Acute psychosis      Adenoma benign      Affect lability  
 Aggression      Agitation      Agoraphobia      Agranulocytosis      Akathisia  
 Akinesia      Alanine aminotransferase increased      Albright's disease  
 Albuminuria      Alcohol intolerance      Alkalosis      Alopecia  
 Altered state of consciousness      Amblyopia      Amenorrhoea  
 Amnesia      Anaemia      Anaemia macrocytic      Anaphylactic

shock Anaphylactoid reaction Anger Angina pectoris Angioedema  
 Angiopathy Angle closure glaucoma Anorectal disorder  
 Anorgasmia Antisocial behaviour Antisocial personality  
 disorder Anxiety Aortic dissection Aortic embolus Apathy  
 Aphasia Aphthous stomatitis Apnoea Appendicitis  
 Arrhythmia Arteriospasm coronary Arteritis Arthralgia  
 Arthritis Arthropathy Asocial behaviour Aspartate  
 aminotransferase increased Asphyxia Aspiration Asthenia  
 Asthma Ataxia Atelectasis Atrial fibrillation  
 Atrial flutter Atrioventricular block Atrioventricular block  
 first degree Atrophy Azotaemia Back pain Balance disorder  
 Basophilia Benign prostatic hyperplasia Bladder pain  
 Blepharitis Blepharospasm Blindness Blister Blood  
 alkaline phosphatase increased Blood bilirubin increased Blood  
 cholesterol increased Blood creatine phosphokinase increased Blood  
 creatinine increased Blood glucose decreased Blood glucose  
 increased Blood insulin increased Blood lactate dehydrogenase  
 increased Blood potassium decreased Blood potassium increased  
 Blood pressure abnormal Blood pressure diastolic decreased  
 Blood pressure fluctuation Blood pressure increased Blood  
 pressure systolic decreased Blood prolactin increased Blood  
 triglycerides increased Blood triglycerides normal Blood urea  
 increased Blood uric acid increased Blood urine Blood urine  
 present Blunted affect Body temperature decreased Body  
 temperature increased Bone neoplasm Bone pain Bradycardia  
 Bradykinesia Bradyphrenia Breast disorder Breast  
 enlargement Breast feeding Breast pain Breath odour Bronchitis  
 Bronchopneumopathy Bruxism Buccoglossal syndrome  
 Bundle branch block Burning sensation Bursitis Calculus  
 urinary Candidiasis Carbohydrate tolerance decreased Cardiac  
 arrest Cardiac disorder Cardiac failure Cardiac failure  
 congestive Cardiac fibrillation Cardiac flutter Cardiac murmur  
 Cardiac valve disease Cardio-respiratory arrest  
 Cardiomegaly Cardiomyopathy Cardiopulmonary failure  
 Cardiovascular disorder Carpal tunnel syndrome Cataplexy  
 Cataract Catatonia Cells in urine Cellulitis Cerebral  
 haemorrhage Cerebral infarction Cerebral ischaemia  
 Cerebrospinal fluid rhinorrhoea Cerebrovascular accident  
 Cerebrovascular disorder Cervicitis Chapped lips  
 Cheilitis Chest discomfort Chest pain Chills Choking  
 Choking sensation Cholecystitis Cholelithiasis Cholestasis  
 Choreoathetosis Chronic obstructive pulmonary disease  
 Coccydynia Cognitive disorder Cogwheel rigidity Cold sweat  
 Colitis ischaemic Coma Completed suicide Condition aggravated  
 Confusional state Congenital anomaly Congenital  
 genitourinary abnormality Conjunctivitis Connective tissue  
 disorder Constipation Conversion disorder Convulsion  
 Coordination abnormal Corneal lesion Costochondritis Cough  
 Cyanosis Cystitis Cystitis noninfective Deafness Death  
 Decreased appetite Decubitus ulcer Deep vein thrombosis  
 Deficiency anaemia Dehydration Delirium Delusion  
 Dementia Dental caries Dependence Depersonalisation  
 Depressed level of consciousness Depression Depressive  
 symptom Derealisation Dermal cyst Dermatitis Dermatitis atopic  
 Dermatitis bullous Dermatitis contact Dermatitis

exfoliative Developmental delay Diabetes mellitus Diabetic coma  
 Diabetic hyperglycaemic coma Diabetic hyperosmolar coma  
 Diabetic ketoacidosis Diarrhoea Diplopia Discomfort  
 Disease progression Disorientation Disseminated  
 intravascular coagulation Dissociation Disturbance in  
 attention Disturbance in sexual arousal Dizziness Dizziness  
 exertional Dizziness postural Drooling Drug abuse Drug  
 dependence Drug eruption Drug interaction Dry eye Dry mouth  
 Dry skin Dry throat Duodenal ulcer Dysarthria Dysgeusia  
 Dyskinesia Dysmenorrhoea Dyspepsia Dysphagia Dysphemia  
 Dysphonia Dysphoria Dyspnoea Dystonia Dysuria Ear  
 disorder Ear infection Ear pain Ecchymosis Eclampsia  
 Eczema Effusion Ejaculation disorder Elastosis  
 perforans Electrocardiogram QT prolonged Electrocardiogram ST  
 segment elevation Electrocardiogram T wave inversion Electrocardiogram  
 abnormal Electrocardiogram change Electroencephalogram  
 abnormal Embolism Encephalopathy Endocrine disorder  
 Energy increased Enteritis Enuresis Eosinophilia  
 Epididymitis Epilepsy Epistaxis Erectile dysfunction  
 Eruption Erythema Erythema multiforme Erythromelalgia  
 Euphoric mood Exfoliative rash Exostosis Extrapyrarnidal  
 disorder Extrasystoles Eye discharge Eye disorder Eye  
 haemorrhage Eye infection Eye inflammation Eye irritation Eye  
 pain Eyelid disorder Eyelid function disorder Eyelid oedema  
 Eyelid ptosis Face oedema Facial pain Facial paresis  
 Faecal incontinence Faecalith Faecaloma Faeces hard  
 Fasting Fatigue Fear Feeling abnormal Feeling cold  
 Feeling hot Feeling jittery Female sexual dysfunction  
 Fibrosis Flank pain Flat affect Flatulence Flushing  
 Folliculitis Formication Fungal infection Fungal skin  
 infection Furuncle Gait disturbance Galactorrhoea Gamma-  
 glutamyltransferase increased Gastric disorder Gastric pH  
 decreased Gastric ulcer Gastric ulcer haemorrhage Gastritis  
 Gastroenteritis Gastrointestinal disorder Gastrointestinal  
 haemorrhage Gastrointestinal pain Gastrooesophageal reflux disease  
 General symptom Genital discharge Gestational hypertension  
 Gingival bleeding Gingival pain Gingivitis Glaucoma  
 Glossitis Glossodynia Glucose tolerance decreased Glucose  
 tolerance impaired Glycosuria Glycosylated haemoglobin increased  
 Goitre Gout Grand mal convulsion Gravitational oedema  
 Groin pain Gynaecomastia Haematemesis Haematochezia  
 Haematocrit decreased Haematoma Haematuria Haemoglobin  
 Haemoglobin decreased Haemoglobin increased Haemolysis  
 Haemoptysis Haemorrhage Haemorrhage intracranial  
 Haemorrhoids Hallucination Hallucination, auditory  
 Hallucination, visual Hangover Head discomfort Headache  
 Heart disease congenital Heart rate irregular Hemianopia  
 Hemiparesis Hemiplegia Hepatic enzyme increased Hepatic  
 failure Hepatic function abnormal Hepatic steatosis Hepatitis  
 Hepatobiliary disease Hepatomegaly Hernia Hiccups  
 Hirsutism Homicidal ideation Hormone level abnormal  
 Hostility Hot flush Hyperacusis Hyperaemia Hyperaesthesia  
 Hyperbilirubinaemia Hyperchloraemia Hyperchlorhydria  
 Hypercholesterolaemia Hyperglycaemia Hyperhidrosis  
 Hyperinsulinism Hyperkalaemia Hyperkeratosis



Hyperkinesia      Hyperlipidaemia      Hypernatraemia  
Hyperparathyroidism      Hyperpathia      Hyperplasia      Hyperreflexia  
Hypersensitivity      Hypersexuality      Hypersomnia      Hypertension  
Hypertensive crisis      Hyperthermia      Hyperthyroidism  
Hypertonia      Hypertriglyceridaemia      Hypertrophy      Hyperuricaemia  
Hyperventilation      Hypoaesthesia      Hypoaesthesia oral  
Hypocalcaemia      Hypochloraemia      Hypocholesterolaemia  
Hypochromic anaemia      Hypoglycaemia      Hypokalaemia  
Hypokinesia      Hypomagnesaemia      Hypomania      Hypomenorrhoea  
Hyponatraemia      Hypophagia      Hypoproteinaemia      Hyporeflexia  
Hypotension      Hypothermia      Hypothyroidism      Hypotonia  
Hypoventilation      Hypoxia      Idiopathic thrombocytopenic  
purpura      Ileus      Ileus paralytic      Ill-defined disorder      Immune  
system disorder      Inappropriate antidiuretic hormone secretion  
Incontinence      Increased appetite      Increased bronchial  
secretion      Induration      Infarction      Infection      Infestation  
Inflammation      Influenza      Inguinal hernia      Injection site  
mass      Injection site pain      Injection site reaction      Insomnia  
Intention tremor      Intentional self-injury      Interstitial lung  
disease      Intestinal functional disorder      Intestinal obstruction  
Intestinal perforation      Iron deficiency      Iron deficiency  
anaemia      Irritability      Irritable bowel syndrome      Ischaemia  
Ischaemic stroke      Jaundice      Jaundice cholestatic      Joint  
contracture      Joint range of motion decreased      Joint stiffness      Joint  
swelling      Judgement impaired      Keratitis      Ketoacidosis  
Ketosis      Laboratory test abnormal      Lacrimal disorder  
Lacrimation increased      Laryngitis      Laryngospasm      Leiomyoma  
Lens disorder      Lenticular opacities      Lenticular  
pigmentation      Leriche syndrome      Lethargy      Leukocytosis  
Leukoderma      Leukopenia      Leukoplakia oral      Libido decreased  
Libido increased      Lip dry      Liver disorder      Liver function  
test abnormal      Logorrhoea      Loss of consciousness      Loss of libido  
Lower respiratory tract infection      Lung infiltration  
Lymphadenopathy      Lymphocytosis      Lymphoedema      Major depression  
Malaise      Male sexual dysfunction      Mania      Masked facies  
Mastitis      Mediastinal disorder      Melaena      Memory impairment  
Menopausal symptoms      Menorrhagia      Menstrual disorder  
Menstruation irregular      Mental disability      Mental disorder  
Mental retardation      Mental status changes      Metrorrhagia  
Micturition urgency      Migraine      Miosis      Mitral valve  
incompetence      Mobility decreased      Monocytosis      Mood swings      Mouth  
ulceration      Movement disorder      Muscle atrophy      Muscle contractions  
involuntary      Muscle contracture      Muscle enzyme increased  
Muscle relaxant therapy      Muscle rigidity      Muscle spasms  
Muscle tightness      Muscle twitching      Muscular weakness  
Musculoskeletal chest pain      Musculoskeletal discomfort  
Musculoskeletal pain      Musculoskeletal stiffness      Myalgia  
Myasthenic syndrome      Mydriasis      Myocardial infarction  
Myocardial ischaemia      Myocarditis      Myoclonus      Myopathy      Nasal  
congestion      Nasal disorder      Nasal dryness      Nasopharyngitis  
Nausea      Neck pain      Neoplasm      Neoplasm malignant  
Neoplasm recurrence      Nephritis      Nephrolithiasis      Nervous  
system disorder      Nervousness      Neuralgia      Neurodermatitis      Neuroleptic  
malignant syndrome      Neurological symptom      Neuropathy peripheral  
Neurosis      Neutropenia      Neutrophil count decreased      Neutrophil

count increased Night sweats Nightmare Nocturia  
Normochromic normocytic anaemia Nuchal rigidity Nystagmus  
Obesity Obsessive thoughts Obstruction Ocular hyperaemia  
Oculogyric crisis Oedema Oedema peripheral Oesophageal  
disorder Oesophageal ulcer Oesophagitis Oliguria  
Onychomycosis Opisthotonus Oral candidiasis Oral pain  
Orchitis noninfective Oropharyngeal discomfort  
Oropharyngeal pain Oropharyngeal spasm Orthostatic  
hypotension Osteoarthritis Osteopenia Osteoporosis Otitis  
externa Otitis media Ovarian cyst Pain Pain in extremity  
Pain in jaw Pallor Palpitations Pancreatitis  
Pancreatitis acute Panic attack Panic disorder Panic  
disorder with agoraphobia Panic reaction Paraesthesia  
Paraesthesia oral Paralysis Paranoia Parkinsonian gait  
Parkinsonism Parosmia Pathological fracture  
Pathological gambling Pelvic pain Peptic ulcer Pericardial  
effusion Pericarditis constrictive Periodontitis Periorbital  
oedema Peripheral coldness Peripheral vascular disorder  
Personality disorder Petechiae Pharyngeal erythema  
Pharyngitis Phlebitis Phobia Phonological disorder  
Photophobia Photopsia Photosensitivity reaction Platelet  
count decreased Pleural disorder Pleural effusion Pleural fibrosis  
Pneumonia Pneumonia aspiration Poisoning Pollakiuria  
Polycythaemia Polydipsia Polyuria Pre-eclampsia  
Premature ejaculation Premenstrual syndrome Presyncope  
Priapism Productive cough Prolactinoma Prostatitis  
Protein urine present Proteinuria Protrusion tongue Pruritus  
Pruritus genital Psoriasis Psychiatric symptom Psychomotor  
retardation Psychotic disorder Pulmonary congestion Pulmonary  
embolism Pulmonary fibrosis Pulmonary oedema Purpura  
Pyelonephritis Pyuria Rash Rash erythematous Rash  
maculo-papular Rash papular Rash pustular Rash vesicular  
Raynaud's phenomenon Rectal haemorrhage Red blood cell  
count decreased Red blood cell sedimentation rate increased  
Reflux oesophagitis Regressive behaviour Regurgitation  
Renal failure acute Renal pain Respiratory alkalosis  
Respiratory arrest Respiratory disorder Respiratory  
distress Respiratory failure Respiratory tract congestion  
Respiratory tract infection Respiratory tract infection viral  
Restless legs syndrome Retching Retroperitoneal fibrosis  
Rhabdomyolysis Rheumatoid arthritis Rhinitis Rhinitis  
allergic Rhinitis seasonal Rhinorrhoea Rhonchi Rosacea  
Salivary gland enlargement Salivary hypersecretion Scab  
Schizoaffective disorder Schizophreniform disorder  
Sciatica Scotoma Seasonal allergy Seborrhoeic dermatitis  
Sedation Sensation of heaviness Sensory loss Sepsis  
Septic shock Sexual dysfunction Shock Sinus congestion  
Sinus disorder Sinus headache Sinus tachycardia Sinusitis  
Skin discolouration Skin disorder Skin hypertrophy Skin  
irritation Skin ulcer Sleep apnoea syndrome Sleep disorder Sleep  
talking Sluggishness Sneezing Social avoidant behaviour  
Somnambulism Somnolence Speech disorder Sputum increased  
Status epilepticus Stevens-Johnson syndrome Stomatitis  
Stridor Stupor Subarachnoid haemorrhage Subdural  
haematoma Sudden death Suicidal ideation Suicide attempt

Superior sagittal sinus thrombosis Supraventricular tachycardia  
 Suspiciousness Swelling Swelling face Swollen tongue  
 Syncope Tachycardia Tardive dyskinesia Telangiectasia  
 Tenderness Tendonitis Tenosynovitis Tension Tension  
 headache Testicular pain Thinking abnormal Thirst Thought  
 blocking Throat irritation Throat tightness Thrombocytopenia  
 Thrombocytopenic purpura Thrombocytosis Thrombophlebitis  
 Thrombosis Thyroid adenoma Thyroiditis Tic Tinnitus  
 Tongue discolouration Tongue disorder Tongue dry Tongue  
 oedema Tongue paralysis Tongue spasm Tonsillar hypertrophy  
 Tooth abscess Tooth disorder Tooth impacted Tooth  
 infection Toothache Torsade de pointes Torticollis Toxic  
 epidermal necrolysis Transaminases increased Transient  
 ischaemic attack Tremor Trismus Tuberculin test positive  
 Tubulointerstitial nephritis Ulcer Ulcer haemorrhage Unintended  
 pregnancy Upper respiratory tract infection Urethral disorder  
 Urinary hesitation Urinary incontinence Urinary retention  
 Urinary tract disorder Urinary tract infection Urinary  
 tract obstruction Urine output increased Urosepsis Urticaria  
 Uterine disorder Uterine haemorrhage Uterine leiomyoma  
 Uterovaginal prolapse VIIth nerve paralysis Vaginal discharge  
 Vaginal haemorrhage Vaginal infection Vaginal inflammation  
 Varicose vein Vascular insufficiency Vascular purpura  
 Vasculitis Vasoconstriction Vasodilation procedure Vasospasm  
 Venous thrombosis Ventricular arrhythmia Ventricular  
 extrasystoles Ventricular fibrillation Ventricular  
 tachycardia Vertigo Viral diarrhoea Viral infection Vision  
 blurred Visual acuity reduced Visual impairment Vomiting  
 Vulvovaginal candidiasis Vulvovaginal mycotic infection  
 Vulvovaginal pruritus Vulvovaginitis Water intoxication  
 Weight decreased Weight fluctuation Weight increased  
 Wheezing White blood cell count decreased White blood cell  
 count increased White blood cells urine positive Withdrawal  
 syndrome Xerosis Yawning

\*\*\*\*\*  
 \*\*\*\*\*

Sodium bicarbonate cotransporter 3 - Group: Transporter

Treated with:

sodium bicarbonate: approved small molecule (10 associated  
 side effects) Sodium bicarbonate is used for the treatment of  
 metabolic acidosis which may occur in severe renal disease,  
 uncontrolled diabetes, circulatory insufficiency due to shock or  
 severe dehydration, extracorporeal circulation of blood, cardiac  
 arrest and severe primary lactic acidosis. Also is indicated in  
 severe diarrhea which is often accompanied by a significant loss of  
 bicarbonate. Further indicated in the treatment of certain drug  
 intoxications, including barbiturates (where dissociation of the  
 barbiturate-protein complex is desired), in poisoning by salicylates  
 or methyl alcohol and in hemolytic reactions requiring  
 alkalinization of the urine to diminish nephrotoxicity of blood  
 pigments.

10 known side effects mediated through drugs targeting this protein:

Aggression Alkalosis Cellulitis Extravasation Hypernatraemia  
Irritability Metabolic alkalosis Necrosis Tetany  
Ulcer

\*\*\*\*\*  
\*\*\*\*\*

Oxytocin receptor - Group: Receptor

Treated with:

oxytocin: approved biotech (0 associated side effects) To assist in labor, elective labor induction, uterine contraction induction

carbetocin: approved small molecule (0 associated side effects)  
Used to control postpartum hemorrhage and bleeding after giving birth.

known side effects mediated through drugs targeting this protein:

\*\*\*\*\*  
\*\*\*\*\*

Cysteinyl leukotriene receptor 1 - Group: Receptor

Treated with:

montelukast: approved small molecule (104 associated side effects) For the treatment of asthma

zafirlukast: approved small molecule (53 associated side effects) For the prophylaxis and chronic treatment of asthma.

cinalukast: approved small molecule (0 associated side effects)  
For Protection against second- phase inflammation in exercise-induced bronchoconstriction and Asthma.

nedocromil: approved small molecule (44 associated side effects)  
For the treatment of mild to moderate asthma

pranlukast: approved small molecule (0 associated side effects)  
Used as an adjunct to the standard therapy of inhaled steroids with inhaled long- and/or short-acting beta-agonists.

143 known side effects mediated through drugs targeting this protein:

Abdominal pain Aggression Agitation Agranulocytosis Alanine aminotransferase increased Allergic granulomatous angitis Anaphylactic shock Angioedema Anxiety Aortic dissection Arthralgia Arthritis Aspartate aminotransferase increased Asthenia Atopy Back pain Benign prostatic hyperplasia Blister Blood disorder Body temperature increased Breast tendernessBronchitis Cardiac disorder Chest pain Completed suicideConjunctivitis Connective tissue disorder Convulsion Cough Death Dermatitis Dermatitis atopicDermatitis bullous Diarrhoea Discomfort Disturbance in sexual arousal Dizziness Drug interaction Dyspepsia Dyspnoea Ear infection Ear pain Eczema Eosinophilia Eosinophilic pneumonia Epistaxis Erythema Erythema nodosum Fatigue Feeling abnormal Feeling hotFoetor hepaticus Gastroenteritis Gastrointestinal disorder Gastrointestinal pain Haematemesis Haemoglobin Haemoptysis Haemorrhage Haemorrhagic disorder Hallucination Headache Hepatic failure Hepatic function abnormal Hepatitis cholestatic Hepatitis fulminant Hepatobiliary disease Hepatocellular injury Hyperbilirubinaemia Hyperkinesia Hyperplasia

Hypersensitivity Hypertrophy Hypoaesthesia Ill-defined  
 disorder Immune system disorder Increased bronchial secretion  
 Infection Influenza Insomnia Interstitial lung disease  
 Irritability Laryngitis Leukocytoclastic vasculitis  
 Leukopenia Libido decreased Lip swelling Liver disorder  
 Liver function test abnormal Loeffler's syndrome Malaise  
 Mediastinal disorder Mental disorder Muscle spasms  
 Musculoskeletal discomfort Myalgia Mydriasis Myopia  
 Nasal congestion Nasopharyngitis Nausea Nervous system  
 disorder Neuropathy peripheral Neutropenia Ocular hyperaemia  
 Oedema Otitis media Pain Palpitations  
 Pancreatitis Paraesthesia Pharyngitis Photophobia  
 Pneumonia Pruritus Pulmonary eosinophilia Pyuria Rash  
 Rectal haemorrhage Respiratory disorder Respiratory tract  
 infection Rhinitis Rhinorrhoea Sinus headache Sinusitis Skin  
 infection Somnolence Sputum increased Swelling Tenderness  
 Thirst Thrombocytopenia Tonsillitis Tooth infection  
 Tracheobronchitis Tremor Upper respiratory tract infection  
 Urticaria Varicella Vasculitis Viral infection Vomiting  
 Wheezing

\*\*\*\*\*  
 \*\*\*\*\*

Beta-adrenergic receptor kinase 2 - Group: Enzyme

Treated with:

adenosine triphosphate: approved, nutraceutical small molecule  
 (0 associated side effects) For nutritional supplementation,  
 also for treating dietary shortage or imbalance

known side effects mediated through drugs targeting this protein:

\*\*\*\*\*  
 \*\*\*\*\*

Gamma-aminobutyric-acid receptor subunit alpha-5 - Group: Channel

Treated with:

lorazepam: approved small molecule (126 associated side  
 effects) For the management of anxiety disorders, and for  
 treatment of status epilepticus.

ethchlorvynol: illicit, approved small molecule (0 associated  
 side effects) Used for short-term hypnotic therapy in the  
 management of insomnia for periods of up to one week in duration;  
 however, this medication generally has been replaced by other  
 sedative-hypnotic agents.

temazepam: approved small molecule (35 associated side effects)  
 For the short-term treatment of insomnia (generally 7-10  
 days).

butabarbital: illicit, approved small molecule (0 associated  
 side effects) For short-term treatment of insomnia and anxiety  
 disorders

butalbital: illicit, approved small molecule (0 associated side  
 effects) Used in combination with acetaminophen or aspirin and  
 caffeine for its sedative and relaxant effects in the treatment of  
 tension headaches, migraines, and pain.

talbutal: illicit, approved small molecule (0 associated side  
 effects) For use as a sedative and hypnotic.

pentobarbital: approved small molecule (38 associated side effects) For the short-term treatment of insomnia.

clobazam: illicit,approved small molecule (58 associated side effects) For treatment and management of epilepsy and anxiety disorder.

meprobamate: illicit,approved small molecule (54 associated side effects) For the management of anxiety disorders or for the short-term relief of the symptoms of anxiety.

eszopiclone: approved small molecule (0 associated side effects) For the treatment of insomnia

alprazolam:illicit,approved small molecule (178 associated side effects) For the management of anxiety disorder or the short-term relief of symptoms of anxiety and for the treatment of panic disorder, with or without agoraphobia.

secobarbital: approved small molecule (38 associated side effects) For the Short-term treatment of intractable insomnia for patients habituated to barbiturates

metharbital: approved small molecule (0 associated side effects) Metharbital is used for the treatment of epilepsy.

chlordiazepoxide:illicit,approved small molecule (20 associated side effects) For the management of anxiety disorders or for the short-term relief of symptoms of anxiety, withdrawal symptoms of acute alcoholism, and preoperative apprehension and anxiety.

adinazolam: approved small molecule (0 associated side effects) For the treatment of anxiety and status epilepticus.

thiopental: approved small molecule (0 associated side effects) For use as the sole anesthetic agent for brief (15 minute) procedures, for induction of anesthesia prior to administration of other anesthetic agents, to supplement regional anesthesia, to provide hypnosis during balanced anesthesia with other agents for analgesia or muscle relaxation, for the control of convulsive states during or following inhalation anesthesia or local anesthesia, in neurosurgical patients with increased intracranial pressure, and for narcoanalysis and narcosynthesis in psychiatric disorders.

clorazepate: illicit,approved small molecule (0 associated side effects) For the management of anxiety disorders or for the short-term relief of the symptoms of anxiety. Also used as adjunctive therapy in the management of partial seizures and for the symptomatic relief of acute alcohol withdrawal.

midazolam: illicit,approved small molecule (119 associated side effects) For use as a sedative perioperatively.

flurazepam:illicit,approved small molecule (62 associated side effects) For short-term and intermittent use in patients with recurring insomnia and poor sleeping habits

primidone: approved small molecule (16 associated side effects) For the treatment of epilepsy

halazepam: illicit,approved small molecule (0 associated side effects) Used to relieve anxiety, nervousness, and tension associated with anxiety disorders.

diazepam: illicit,approved small molecule (149 associated side effects) Used in the treatment of severe anxiety disorders, as a hypnotic in the short-term management of insomnia, as a sedative and premedicant, as an anticonvulsant, and in the management of alcohol withdrawal syndrome.

oxazepam: approved small molecule (36 associated side effects)  
For the treatment of anxiety disorders and alcohol withdrawal.

methylphenobarbital: approved small molecule (37 associated side effects)  
For the relief of anxiety, tension, and apprehension, also used as an anticonvulsant for the treatment of epilepsy.

triazolam: illicit,approved,withdrawn small molecule (66 associated side effects)  
For the short-term treatment of insomnia.

clonazepam: illicit,approved small molecule (228 associated side effects)  
Used as an anticonvulsant in the treatment of the Lennox-Gastaut syndrome (petit mal variant), akinetic and myoclonic seizures.

flumazenil: approved small molecule (100 associated side effects)  
For the complete or partial reversal of the sedative effects of benzodiazepines in cases where general anesthesia has been induced and/or maintained with benzodiazepines, and where sedation has been produced with benzodiazepines for diagnostic and therapeutic procedures. Also for the management of benzodiazepine overdose as an adjunct for appropriate supportive and symptomatic measures.

estazolam: illicit,approved small molecule (131 associated side effects)  
For the short-term management of insomnia characterized by difficulty in falling asleep, frequent nocturnal awakenings, and/or early morning awakenings.

amobarbital: illicit,approved small molecule (0 associated side effects)

aprobarbital: illicit,approved small molecule (0 associated side effects)

butethal: illicit,approved small molecule (0 associated side effects)  
For the treatment of insomnia.

heptabarbital: approved small molecule (0 associated side effects)  
Used mainly for sedation and hypnosis.

hexobarbital: approved small molecule (0 associated side effects)  
For the induction of anesthesia prior to the use of other general anesthetic agents and for induction of anesthesia for short surgical, diagnostic, or therapeutic procedures associated with minimal painful stimuli.

barbituric acid derivative: illicit,experimental small molecule (0 associated side effects)

flunitrazepam: illicit,approved small molecule (0 associated side effects)  
For short-term treatment of severe insomnias, that are not responsive to other hypnotics.

bromazepam: illicit,approved small molecule (47 associated side effects)  
For the short-term treatment of insomnia, short-term treatment of anxiety or panic attacks, if a benzodiazepine is required, and the alleviation of the symptoms of alcohol- and opiate-withdrawal.

clotiazepam: illicit,approved small molecule (0 associated side effects)  
For the treatment of anxiety disorders.

fludiazepam: illicit,approved small molecule (0 associated side effects)  
Used for the short-term treatment of anxiety disorders.

prazepam: illicit,approved small molecule (0 associated side effects)  
For the treatment of anxiety disorders.

quazepam: illicit, approved small molecule (0 associated side effects) Used to treat insomnia.  
 cinolazepam: approved small molecule (0 associated side effects) For the management of anxiety disorders or for the short-term relief of the symptoms of anxiety or anxiety associated with depressive symptoms.

561 known side effects mediated through drugs targeting this protein:

Abdominal discomfort Abdominal distension Abdominal pain  
 Abnormal dreams Abnormal faeces Acidosis Acne Affect  
 lability Ageusia Aggression Agitation Agranulocytosis  
 Akathisia Akinesia Alcohol poisoning Alopecia Altered  
 state of consciousness Amblyopia Amenorrhoea Amnesia Anaemia  
 Anaemia megaloblastic Anaphylactic shock Anaphylactoid  
 reaction Anger Angioedema Angiopathy Anorectal discomfort  
 Anorectal disorder Anterograde amnesia Anuria  
 Anxiety Aortic dissection Apathy Aphonia Aplasia  
 Aplastic anaemia Apnoea Appetite disorder Arrhythmia  
 Arterial spasm Arthralgia Arthritis Arthropathy Aspartate  
 aminotransferase increased Asphyxia Aspiration Asthenia  
 Asthma Ataxia Athetosis Atrioventricular block Back  
 pain Balance disorder Bladder dysfunction Bladder pain  
 Blindness Blood alkaline phosphatase increased Blood  
 bilirubin increased Blood disorder Blood glucose decreased  
 Blood thromboplastin decreased Body temperature decreased  
 Body temperature increased Borderline personality disorder  
 Bradycardia Bradyphrenia Brain oedema Breast disorder  
 Breast engorgement Breast enlargement Breast feeding  
 Breast neoplasm Breast pain Breast swelling Breath odour  
 Bronchitis Bronchospasm Bursitis Candidiasis Carbon  
 dioxide increased Cardiac arrest Cardiac disorder Cardiac failure  
 Cardio-respiratory arrest Cardiovascular disorder  
 Cellulitis Cerebellar syndrome Cerebrovascular accident  
 Chest discomfort Chest pain Chills Choking sensation  
 Cholelithiasis Chorea Chromaturia Clonic convulsion  
 Clonus Clumsiness Coagulopathy Cognitive disorder  
 Colitis Coma Completed suicide Confusional state Congenital  
 skin disorder Conjunctivitis Connective tissue disorder  
 Constipation Conversion disorder Convulsion  
 Coordination abnormal Cough Crying Cyanosis Cystitis  
 Cystitis noninfective Cytolytic hepatitis Deafness Death  
 Decreased appetite Dehydration Delirium Delirium tremens  
 Delusion Dependence Depersonalisation Depressed level of  
 consciousness Depressed mood Depression Depressive symptom  
 Derealisation Dermatitis Dermatitis bullous Dermatitis  
 contact Dermatitis exfoliative Diarrhoea Diplopia Discomfort  
 Disinhibition Disorientation Disturbance in attention  
 Disturbance in sexual arousal Dizziness Drooling Drug  
 abuse Drug dependence Drug eruption Drug hypersensitivity Drug  
 intolerance Drug withdrawal convulsions Dry eye Dry mouth Dry  
 skin Dysaesthesia Dysarthria Dysgeusia Dyskinesia  
 Dysmenorrhoea Dyspepsia Dysphagia Dysphonia Dysphoria  
 Dyspnoea Dysthymic disorder Dystonia Dysuria Ear  
 infection Ear pain Ecchymosis Eczema Effusion Ejaculation



delayed Ejaculation failure Elderly Emotional disorder  
 Emotional distress Emotional poverty Encephalopathy  
 Encopresis Endometrial sarcoma Energy increased  
 Enterocolitis Enuresis Eosinophilia Epilepsy  
 Epistaxis Erectile dysfunction Erythema Erythema  
 multiforme Euphoric mood Extrapyrarnidal disorder  
 Extrasystoles Eye disorder Eye irritation Eye  
 movement disorder Eye pain Eye swelling Eyelid ptosis Face  
 oedema Faecal incontinence Fatigue Fear Feeling abnormal  
 Feeling cold Feeling drunk Feeling hot Feeling jittery  
 Feeling of body temperature change Flat affect Flatulence  
 Floppy infant Flushing Fungal infection Furuncle Gait  
 disturbance Galactorrhoea Gangrene Gastric disorder Gastric  
 ulcer Gastritis Gastrointestinal disorder Gastrointestinal  
 haemorrhage Gastrointestinal pain Gingival pain Glossitis  
 Glossodynia Gout Grand mal convulsion Gynaecomastia  
 Haematoma Haematuria Haemoglobin Haemoglobin decreased  
 Haemorrhage Haemorrhage urinary tract Haemorrhoids  
 Hallucination Hangover Headache Hearing impaired Heart  
 rate irregular Hemiparesis Hepatic enzyme increased Hepatic  
 failure Hepatic function abnormal Hepatitis Hepatocellular  
 injury Hepatomegaly Hernia Herpes simplex Herpes  
 virus infection Herpes zoster Hiccups Hirsutism Homicidal  
 ideation Hordeolum Hostility Hot flush Hunger Hyperacusis  
 Hyperaemia Hyperaesthesia Hypercapnia Hypercholesterolaemia  
 Hyperhidrosis Hyperkinesia Hyperlipidaemia  
 Hyperprolactinaemia Hyperpyrexia Hypersensitivity  
 Hypersomnia Hypertension Hypertonia Hypertrophy  
 Hyperventilation Hypoaesthesia Hypochromic anaemia  
 Hypokalaemia Hypokinesia Hypomania Hyponatraemia  
 Hypopnoea Hyporeflexia Hypotension Hypothermia Hypotonia  
 Hypoventilation Hypoxia Ill-defined disorder Illusion  
 Inappropriate antidiuretic hormone secretion Incontinence  
 Increased appetite Induration Infection Infectious  
 mononucleosis Infestation Inflammation Influenza Injection  
 site pain Injection site reaction Insomnia Intraocular  
 pressure increased Iritis Irritability Jaundice Joint  
 swelling Laboratory test abnormal Laryngitis Laryngospasm  
 Lethargy Leukocytosis Leukopenia Libido decreased  
 Libido increased Liver disorder Liver function test abnormal  
 Liver injury Local reaction Logorrhoea Loss of  
 consciousness Loss of libido Lung disorder Lymphadenopathy  
 Major depression Malaise Mania Mastitis Mean arterial  
 pressure Mediastinal disorder Melaena Memory impairment  
 Menopausal symptoms Menorrhagia Menstrual disorder  
 Menstruation irregular Mental disability Mental disorder  
 Mental retardation Metrorrhagia Micturition urgency  
 Migraine Miosis Mood swings Motion sickness Mouth  
 ulceration Movement disorder Muscle relaxant therapy Muscle  
 rigidity Muscle spasms Muscle spasticity Muscle twitching  
 Muscular weakness Musculoskeletal discomfort Musculoskeletal  
 disorder Musculoskeletal stiffness Myalgia Mydriasis  
 Myoclonus Myopathy Nasal congestion Nasopharyngitis  
 Nausea Neck pain Necrosis Neoplasm Nephrolithiasis  
 Nervous system disorder Nervousness Neuralgia Neuritis

Neuroleptic malignant syndrome      Neuropathy peripheral  
 Neurosis      Neutropenia      Nightmare      Nocturia      Nodal arrhythmia  
 Nodal rhythm      Nodule      Nuchal rigidity      Nystagmus  
 Obstruction      Obstructive airways disorder      Oedema      Oedema  
 peripheral      Oliguria      Oropharyngeal pain      Orthostatic  
 hypotension      Osteoarthritis      Osteomalacia      Otitis externa  
 Otitis media      Pain      Pain in extremity      Pain in jaw      Pallor  
 Palpitations      Pancytopenia      Panic attack      Panic  
 disorder      Panic reaction      Paraesthesia      Paraesthesia oral  
 Paralysis      Paranoia      Paresis      Pelvic pain      Penile discharge  
 Pericardial effusion      Periorbital oedema      Personality  
 disorder      Petechiae      Phaeochromocytoma      Pharyngitis      Phlebitis  
 Phobia      Photophobia      Photosensitivity reaction  
 Pigmentation disorder      Platelet count decreased      Pleurisy  
 Pneumonia      Pneumothorax      Pollakiuria      Polyuria      Post-  
 traumatic stress disorder      Precocious puberty      Premenstrual  
 syndrome      Presyncope      Proctalgia      Proctitis      Prothrombin level  
 increased      Pruritus      Psychomotor retardation      Psychotic  
 disorder      Puberty      Pulmonary congestion      Pulmonary function  
 test decreased      Pulmonary haemorrhage      Pulmonary hypertension  
 Pulmonary oedema      Purpura non-thrombocytopenic      Pyelonephritis  
 Rash      Rash maculo-papular      Rash pustular      Rectal  
 haemorrhage      Rectal tenesmus      Renal failure      Renal pain      Respiratory  
 arrest      Respiratory depression      Respiratory disorder      Respiratory  
 failure      Respiratory moniliasis      Respiratory rate decreased  
 Respiratory tract congestion      Respiratory tract infection  
 Retching      Retrograde amnesia      Rhinitis allergic      Rhinorrhoea  
 Rhonchi      Salivary hypersecretion      Scotoma      Sedation  
 Sensation of heaviness      Sexual dysfunction      Shock      Sinus  
 tachycardia      Sinusitis      Skin burning sensation      Skin discolouration  
 Skin disorder      Skin exfoliation      Skin necrosis      Sleep  
 apnoea syndrome      Sleep disorder      Sleep talking      Sluggishness  
 Sneezing      Somnambulism      Somnolence      Speech disorder  
 Stevens-Johnson syndrome      Stomatitis      Strabismus      Stridor  
 Stupor      Substance abuse      Suicidal ideation      Swelling  
 Swelling face      Swollen tongue      Syncope      Tachycardia  
 Tachypnoea      Tenderness      Tendonitis      Tension      Tetany  
 Therapeutic response decreased      Thinking abnormal      Thirst  
 Thrombocytopenia      Thrombocytopenic purpura      Thrombocytosis  
 Thrombophlebitis      Thrombosis      Thyroid neoplasm      Tinnitus  
 Tongue coated      Tongue disorder      Tongue oedema      Tooth  
 disorder      Toothache      Toxic epidermal necrolysis      Transaminases  
 increased      Tremor      Tropical spastic paresis      Ulcer      Upper  
 airway obstruction      Upper respiratory tract infection      Urethral  
 disorder      Urethritis      Urinary hesitation      Urinary incontinence  
 Urinary retention      Urinary tract disorder      Urinary tract  
 infection      Urine colour abnormal      Urine output increased      Urticaria  
 Uterine haemorrhage      Uterovaginal prolapse      Vaginal discharge  
 Vaginal haemorrhage      Vaginal infection      Vaginal inflammation  
 Vascular purpura      Vasodilation procedure      Venous thrombosis  
 Ventricular arrhythmia      Ventricular extrasystoles      Ventricular  
 tachycardia      Vertigo      Vestibular disorder      Viral infection  
 Vision blurred      Visual acuity reduced      Visual impairment  
 Vomiting      Weight decreased      Weight increased      Wheezing  
 Withdrawal syndrome      Xeroderma      Xerophthalmia      Yawning

\*\*\*\*\*  
\*\*\*\*\*

Cytokine receptor common gamma chain - Group: Receptor

Treated with:

denileukin diftitox: approved biotech (0 associated side effects) For treatment of cutaneous T-cell lymphoma  
aldesleukin: approved biotech (0 associated side effects) For treatment of adults with metastatic renal cell carcinoma.

known side effects mediated through drugs targeting this protein:

\*\*\*\*\*  
\*\*\*\*\*

Erythropoietin receptor - Group: Receptor

Treated with:

darbepoetin alfa: approved biotech (0 associated side effects) For the treatment of anemia (from renal transplants or certain HIV treatment)  
3,5 dibromotyrosine: experimental small molecule (0 associated side effects)

known side effects mediated through drugs targeting this protein:

\*\*\*\*\*  
\*\*\*\*\*

Beta-1 adrenergic receptor - Group: Receptor

Treated with:

esmolol: approved small molecule (105 associated side effects) For the rapid control of ventricular rate in patients with atrial fibrillation or atrial flutter in perioperative, postoperative, or other emergent circumstances where short term control of ventricular rate with a short-acting agent is desirable. Also used in noncompensatory sinus tachycardia where the rapid heart rate requires specific intervention.  
betaxolol: approved small molecule (211 associated side effects) For the management of hypertension.  
isoetharine: approved small molecule (0 associated side effects) For the treatment of asthma, wheezing, and chronic asthmatic bronchitis.  
metoprolol: approved small molecule (132 associated side effects) For the management of acute myocardial infarction, angina pectoris, heart failure and mild to moderate hypertension. May be used to treat supraventricular and tachyarrhythmias and as prophylaxis for migraine headaches.  
atenolol: approved small molecule (169 associated side effects) For the management of hypertension and long-term management of patients with angina pectoris  
norepinephrine: approved small molecule (22 associated side effects) Mainly used to treat patients in vasodilatory shock states such as septic shock and neurogenic shock and has shown a survival benefit over dopamine. Also used as a vasopressor medication for patients with critical hypotension.  
timolol: approved small molecule (149 associated side effects) In its oral form it is used to treat high blood pressure and prevent heart attacks, and occasionally to prevent migraine

headaches. In its ophthalmic form it is used to treat open-angle and occasionally secondary glaucoma.

phenylpropanolamine: approved, withdrawn small molecule (0 associated side effects) For the treatment of nasal congestion, control of urinary incontinence, priapism and obesity.

sotalol: approved small molecule (99 associated side effects)

For the maintenance of normal sinus rhythm [delay in time to recurrence of atrial fibrillation/atrial flutter (AFIB/AFL)] in patients with symptomatic AFIB/AFL who are currently in sinus rhythm. Also for the treatment of documented life-threatening ventricular arrhythmias.

carteolol: approved small molecule (43 associated side effects)

For the treatment of intraocular hypertension and chronic open-angle glaucoma

propranolol: approved small molecule (96 associated side effects) For the prophylaxis of migraine.

labetalol: approved small molecule (103 associated side effects) For the management of hypertension (alone or in combination with other classes of antihypertensive agents), as well as chronic stable angina pectoris and sympathetic overactivity syndrome associated with severe tetanus. Labetalol is used parenterally for immediate reduction in blood pressure in severe hypertension or in hypertensive crises when considered an emergency, for the control of blood pressure in patients with pheochromocytoma and pregnant women with preeclampsia, and to produce controlled hypotension during anesthesia to reduce bleeding resulting from surgical procedures.

bisoprolol: approved small molecule (172 associated side effects) For management of heart failure, angina pectoris, and mild to moderate hypertension and for secondary prevention of myocardial infarction (MI).

dobutamine: approved small molecule (18 associated side effects)

For inotropic support in the short-term treatment of patients with cardiac decompensation due to depressed contractility resulting either from organic heart disease or from cardiac surgical procedures

pseudoephedrine: approved small molecule (0 associated side effects) For the treatment of nasal congestion, sinus congestion, Eustachian tube congestion, and vasomotor rhinitis, and as an adjunct to other agents in the optimum treatment of allergic rhinitis, croup, sinusitis, otitis media, and tracheobronchitis. Also used as first-line therapy of priapism.

alprenolol: approved small molecule (0 associated side effects)

For the treatment of hypertension, angina, and arrhythmia

pindolol: approved small molecule (95 associated side effects)

For the management of hypertension, edema, ventricular tachycardias, and atrial fibrillation.

salbutamol: approved small molecule (153 associated side effects) For symptomatic relief and prevention of bronchospasm due to bronchial asthma, chronic bronchitis, and other chronic bronchopulmonary disorders such as COPD.

isoproterenol: approved small molecule (26 associated side effects) For the treatment of mild or transient episodes of heart block that do not require electric shock or pacemaker therapy also used in management of asthma and chronic bronchitis

arbutamine: approved small molecule (0 associated side effects)

Used to elicit acute cardiovascular responses (cardiac stimulant), similar to those produced by exercise, in order to aid in diagnosing the presence or absence of coronary artery disease (CAD) in patients who cannot exercise adequately.

amiodarone: approved small molecule (192 associated side effects) Intravenously, for initiation of treatment and prophylaxis of frequently recurring ventricular fibrillation and hemodynamically unstable ventricular tachycardia in patients refractory to other therapy. Orally, for the treatment of life-threatening recurrent ventricular arrhythmias such as recurrent ventricular fibrillation and recurrent hemodynamically unstable ventricular tachycardia.

carvedilol: approved small molecule (198 associated side effects) For the treatment of mild or moderate (NYHA class II or III) heart failure of ischemic or cardiomyopathic origin.

desipramine: approved small molecule (120 associated side effects) For relief of symptoms in various depressive syndromes, especially endogenous depression. It has also been used to manage chronic peripheral neuropathic pain, as a second line agent for the management of anxiety disorders (e.g. panic disorder, generalized anxiety disorder), and as a second or third line agent in the ADHD management.

acebutolol: approved small molecule (113 associated side effects) For the management of hypertension and ventricular premature beats in adults.

nadolol: approved small molecule (71 associated side effects)

Used in cardiovascular disease to treat arrhythmias, angina pectoris, and hypertension.

levobunolol: approved small molecule (49 associated side effects) For lowering intraocular pressure (IOP) and may be used in patients with chronic open-angle glaucoma or ocular hypertension.

metipranolol: approved small molecule (38 associated side effects) Indicated in the treatment of elevated intraocular pressure in patients with ocular hypertension or open angle glaucoma.

fenoterol: approved small molecule (0 associated side effects)

Fenoterol is used for the treatment of asthma.

pirbuterol: approved small molecule (53 associated side effects)

For the prevention and reversal of bronchospasm in patients 12 years of age and older with reversible bronchospasm including asthma.

bevantolol: approved small molecule (0 associated side effects)

For the treatment of angina pectoris and hypertension.

practolol: approved small molecule (0 associated side effects)

Used in the emergency treatment of cardiac arrhythmias.

penbutolol: approved small molecule (0 associated side effects)

Used in the treatment of high blood pressure.

ephedra: approved, withdrawn, nutraceutical small molecule (0 associated side effects) Ephedra is widely used by athletes, despite a lack of evidence that it enhances athletic performance. Ephedra has also been used for weight loss.

clenbuterol: approved small molecule (0 associated side effects) Used as a bronchodilator in the treatment of asthma patients.

oxprenolol: approved small molecule (0 associated side effects)  
 Used in the treatment of hypertension, angina pectoris,  
 arrhythmias, and anxiety.

nebivolol: approved small molecule (54 associated side effects)  
 For the treatment of essential hypertension.

droxidopa: approved small molecule (0 associated side effects)  
 For treatment of neurogenic orthostatic hypotension (NOH)  
 associated with various disorders including Multiple System Atrophy,  
 Familial Amyloid Polyneuropathy, hemodialysis induced hypotension  
 and Parkinson's Disease. Also investigated for use/treatment in  
 neurologic disorders, nephropathy, blood (blood forming organ  
 disorders, unspecified), and dizzy/fainting spells.

4-[[ (2s)-3-(tert-butylamino)-2-hydroxypropyl]oxy]-3h-indole-2-  
 carbonitrile: experimental small molecule (0 associated  
 side effects)

2-hydroxymethyl-6-octylsulfanyl-tetrahydro-pyran-3,4,5-triol:  
 experimental small molecule (0 associated side effects)

bopindolol: approved small molecule (0 associated side effects)  
 For the management of hypertension, edema, ventricular  
 tachycardias, and atrial fibrillation.

bupranolol: approved small molecule (0 associated side effects)  
 Used to manage hypertension and tachycardia. Also used to  
 treat glaucoma.

621 known side effects mediated through drugs targeting this  
 protein:

Abdominal discomfort Abdominal distension Abdominal pain  
 Abdominal pain upper Abnormal dreams Abscess Acidosis  
 Acne Acute coronary syndrome Acute interstitial  
 pneumonitis Acute myocardial infarction Acute pulmonary oedema Acute  
 respiratory distress syndrome Affect lability Ageusia  
 Aggression Agitation Agranulocytosis Akinesia Alanine  
 aminotransferase increased Albuminuria Alkalosis Alopecia  
 Altered state of consciousness Alveolitis fibrosing  
 Amnesia Anaemia Anaphylactic shock Anaphylactoid  
 reaction Angina pectoris Angina unstable Angioedema Angiopathy  
 Anosmia Antibody test positive Antinuclear antibody  
 positive Anxiety Aortic dissection Aphasia Aplastic anaemia  
 Appetite disorder Arrhythmia Arterial disorder Arterial  
 insufficiency Arterial spasm Arterial stenosis Arterial  
 thrombosis Arteriospasm coronary Arthralgia Arthritis Arthropathy  
 Aspartate aminotransferase increased Asthenia Asthma  
 Ataxia Atelectasis Atrial fibrillation Atrial flutter  
 Atrial tachycardia Atrioventricular block Atrioventricular  
 block complete Atrioventricular block second degree Back pain  
 Balance disorder Benign intracranial hypertension Bladder  
 dilatation Bladder pain Blepharitis Blindness Blister Blood  
 alkaline phosphatase increased Blood bilirubin increased Blood  
 creatinine increased Blood glucose increased Blood insulin  
 increased Blood lactate dehydrogenase increased Blood pressure  
 increased Blood pressure systolic increased Blood triglycerides  
 increased Blood urea increased Blood uric acid increased Body  
 temperature increased Bradycardia Bradykinesia Breast abscess  
 Breast enlargement Breast pain Bronchial obstruction  
 Bronchiolitis Bronchitis Bronchospasm Bronchospasm

paradoxical Bundle branch block Bundle branch block left  
 Candidiasis Cardiac arrest Cardiac disorder Cardiac failure  
 acute Cardiac failure congestive Cardiac fibrillation Cardiac  
 flutter Cardiac output decreased Cardiac septal defect  
 Cardioactive drug level Cardiogenic shock Cardiomegaly  
 Cardiomyopathy Cardiovascular disorder Cataract  
 Catatonia Cellulitis Cerebral haemorrhage Cerebral  
 ischaemia Cerebrovascular accident Cerebrovascular disorder  
 Chest discomfort Chest pain Chills Cholestasis Cholinergic  
 syndrome Choreoathetosis Choroidal detachment Cognitive  
 disorder Cold sweat Colitis Colitis ischaemic Collagen disorder  
 Coma Conduction disorder Confusional state Congenital  
 cardiovascular anomaly Congenital eye disorder Conjunctival  
 hyperaemia Conjunctivitis Constipation Convulsion  
 Coordination abnormal Corneal degeneration Corneal deposits  
 Corneal staining Coronary artery disease Coronary artery  
 insufficiency Cough Crocodile tears syndrome Cutaneous  
 vasculitis Cyanosis Cystitis Cystitis noninfective Cystoid  
 macular oedema Deafness Death Decreased appetite Dehydration  
 Delirium Delusion Demyelinating polyneuropathy Dependence  
 Depressed level of consciousness Depression Dermatitis  
 bullous Dermatitis exfoliative Dermatitis psoriasiform  
 Device capturing issue Diabetes mellitus Diarrhoea Diplopia  
 Discomfort Disorientation Dissociation Disturbance in  
 attention Disturbance in sexual arousal Dizziness Drug  
 dependence Drug eruption Drug interaction Drug level increased  
 Dry eye Dry mouth Dry throat Dysarthria Dysgeusia  
 Dyskinesia Dysmenorrhoea Dyspepsia Dysphagia Dysphonia  
 Dyspnoea Dyspnoea exertional Dysuria Ear disorder  
 Ear infection Ear pain Ecchymosis Eclampsia Eczema  
 Effusion Ejaculation failure Electrocardiogram PR  
 interval Electrocardiogram QT prolonged Electrocardiogram ST  
 segment Electrocardiogram ST segment depression Electrocardiogram  
 abnormal Electrocardiogram change Embolism Encephalopathy  
 Eosinophilia Eosinophilic pneumonia Epididymitis  
 Epistaxis Erectile dysfunction Eructation Erythema  
 Erythema multiforme Erythema of eyelid Extrapyrimal  
 disorder Extrasystoles Extravasation Eye disorder Eye  
 haemorrhage Eye irritation Eye pain Eye pruritus Eyelid  
 ptosis Fasting Fatigue Fear Feeling abnormal Feeling  
 cold Fibroadenoma of breast Fibrosis Flatulence Fluid overload  
 Fluid retention Flushing Foetor hepaticus Gait disturbance  
 Galactorrhoea Gamma-glutamyltransferase increased  
 Gangrene Gastric disorder Gastritis Gastroenteritis  
 Gastrointestinal disorder Gastrointestinal haemorrhage  
 Gastrointestinal pain Generalised oedema Glossitis  
 Glycosuria Goitre Gout Grand mal convulsion Granuloma  
 Gravitational oedema Growth hormone deficiency  
 Gynaecomastia Haematuria Haemoglobin Haemolytic anaemia  
 Haemoptysis Haemorrhage Hallucination Headache Hearing  
 impaired Hemiplegia Hepatic cirrhosis Hepatic enzyme increased  
 Hepatic failure Hepatic function abnormal Hepatic necrosis  
 Hepatitis Hepatitis cholestatic Hepatocellular injury  
 Hepatomegaly Herpes simplex Herpes virus infection High  
 density lipoprotein decreased Hot flush Hyperacusis Hyperaemia

Hyperaesthesia      Hyperbilirubinaemia      Hypercholesterolaemia  
 Hyperglycaemia      Hyperhidrosis      Hyperinsulinism  
 Hyperkalaemia      Hyperkeratosis      Hyperkinesia  
 Hyperlipidaemia      Hypersensitivity      Hypertension  
 Hypertensive crisis      Hyperthyroidism      Hypertonia  
 Hypertrichosis      Hypertriglyceridaemia      Hypertrophy  
 Hyperuricaemia      Hypoaesthesia      Hypoglycaemia  
 Hypokalaemia      Hypokinesia      Hypomania      Hyponatraemia  
 Hypotension      Hypothyroidism      Hypotonia      Hypovolaemia  
 Hypoxia      Idiopathic pulmonary fibrosis      Ileus paralytic  
 Ill-defined disorder      Immune system disorder      Inappropriate  
 antidiuretic hormone secretion      Incontinence      Increased  
 appetite      Increased tendency to bruise      Induration      Infarction  
 Infection      Inflammation      Influenza      Injection site pain  
 Injection site reaction      Insomnia      Intermittent  
 claudication      Interstitial lung disease      Intraocular pressure  
 increased      Iridocyclitis      Iritis      Irritability      Ischaemia  
 Ischaemic cardiomyopathy      Jaundice      Jaundice cholestatic  
 Keratitis      Lacrimation increased      Lactic acidosis      Laryngitis  
 Laryngospasm      Left ventricular failure      Lens disorder  
 Lenticular opacities      Lethargy      Leukaemia      Leukocytoclastic  
 vasculitis      Leukocytosis      Leukopenia      Libido decreased      Lichen  
 planus      Liver disorder      Liver function test abnormal      Local  
 reaction      Loss of consciousness      Loss of libido      Lung disorder  
 Lung infiltration      Lymphadenitis      Lymphadenopathy      Macular  
 degeneration      Macular oedema      Malaise      Mass      Mediastinal  
 disorder      Melaena      Memory impairment      Menopausal symptoms  
 Menstrual disorder      Mental disability      Mental disorder  
 Mesenteric artery thrombosis      Metabolic acidosis      Metabolic  
 disorder      Micturition disorder      Migraine      Mitral valve  
 incompetence      Mood swings      Mouth ulceration      Multiple pregnancy  
 Muscle relaxant therapy      Muscle spasms      Muscle twitching  
 Muscular weakness      Musculoskeletal discomfort      Musculoskeletal  
 pain      Myalgia      Myasthenia gravis      Mydriasis      Myocardial infarction  
 Myocardial ischaemia      Myoclonus      Myopathy toxic      Nasal  
 congestion      Nasopharyngitis      Nausea      Neck pain      Necrosis  
 Neoplasm malignant      Nephropathy      Nervous system disorder  
 Nervousness      Neuralgia      Neuritis      Neuroleptic malignant  
 syndrome      Neuropathy peripheral      Neutropenia      Nightmare      Nocturia  
 Nodal arrhythmia      Nodal rhythm      Nodule      Obliterative  
 bronchiolitis      Obstruction      Oculomucocutaneous syndrome      Oedema  
 Oedema peripheral      Oliguria      Onycholysis      Optic nerve disorder  
 Optic neuritis      Organising pneumonia      Oropharyngeal  
 discomfort      Oropharyngeal pain      Orthostatic hypotension  
 Osteoarthritis      Otitis media      Pain      Pain in extremity  
 Pallor      Palpitations      Pancreatitis      Pancytopenia  
 Papilloedema      Paraesthesia      Paralysis      Paresis  
 Parotid gland enlargement      Pemphigoid      Pemphigus      Peptic  
 ulcer      Periodontitis      Peripheral coldness      Peripheral ischaemia  
 Peripheral vascular disorder      Personality disorder      Petechiae  
 Phaeochromocytoma      Pharyngitis      Phlebitis      Photodermatosis  
 Photophobia      Photosensitivity reaction      Pigmentation disorder  
 Pleural disorder      Pleural effusion      Pleurisy      Pleuritic pain  
 Pneumonia      Poisoning      Pollakiuria      Polyneuropathy  
 Polyserositis      Polyuria      Pressure of speech      Presyncope



Productive cough Prostatitis Protein urine present Proteinuria  
 Prothrombin level decreased Pruritus Psoriasis Psychotic  
 disorder Pulmonary fibrosis Pulmonary oedema Pulmonary  
 toxicity Pulse absent Pulseless electrical activity  
 Punctate keratitis Pupils unequal Purpura Purpura  
 non-thrombocytopenic Pustular psoriasis Rales Rash Rash  
 erythematous Rash generalised Rash maculo-papular Rash  
 papular Raynaud's phenomenon Regurgitation Renal artery  
 stenosis Renal colic Renal failure Renal failure acute Renal  
 impairment Renal pain Renal tubular disorder Renal tubular necrosis  
 Respiratory alkalosis Respiratory disorder Respiratory  
 distress Respiratory failure Respiratory tract infection  
 Retching Retinal vascular disorder Retroperitoneal  
 fibrosis Rhabdomyolysis Rhinitis Rhonchi Salivary  
 hypersecretion Scab Scleroderma Scotoma Sedation Sensation  
 of foreign body Sensory loss Serositis Sexual dysfunction  
 Shock Sicca syndrome Sick sinus syndrome Sinoatrial block  
 Sinus arrest Sinus bradycardia Sinus congestion Sinus  
 rhythm Sinus tachycardia Sinusitis Skin cancer Skin  
 discolouration Skin disorder Skin exfoliation Skin  
 hyperpigmentation Skin irritation Skin lesion Skin necrosis Skin  
 ulcer Sleep disorder Social avoidant behaviour Somnolence  
 Speech disorder Status asthmaticus Sticky skin Stomatitis  
 Stupor Subarachnoid haemorrhage Sudden death  
 Supraventricular extrasystoles Supraventricular tachycardia  
 Swelling Swelling face Syncope Systemic lupus  
 erythematosus Systolic hypertension Tachyarrhythmia Tachycardia  
 Talipes Tenderness Tendonitis Tension Testicular  
 swelling Thinking abnormal Thirst Thought blocking Throat  
 irritation Thrombocytopenia Thrombocytopenic purpura  
 Thrombophlebitis Thrombosis Thyroid cancer Thyroid disorder  
 Thyroid neoplasm Tinnitus Tongue discolouration Tongue  
 ulceration Torsade de pointes Toxic epidermal necrolysis  
 Toxicity to various agents Tracheobronchitis Transaminases  
 increased Tremor Type I hypersensitivity Ulcer Upper  
 respiratory tract infection Urethral disorder Urinary incontinence  
 Urinary retention Urinary tract disorder Urinary tract  
 infection Urine output increased Urogenital disorder Urticaria  
 Uterovaginal prolapse Uveitis Vascular anomaly Vascular  
 insufficiency Vascular purpura Vascular resistance systemic  
 Vasculitis Vasoconstriction Vasodilation procedure Venous  
 thrombosis Ventricular arrhythmia Ventricular extrasystoles  
 Ventricular fibrillation Ventricular septal defect  
 Ventricular tachycardia Vertigo Viral infection  
 Vision blurred Visual acuity reduced Visual impairment  
 Vitreous disorder Vomiting Vulvovaginal candidiasis  
 Vulvovaginal mycotic infection Weight decreased Weight  
 increased Wheezing Yawning

\*\*\*\*\*  
 \*\*\*\*\*

Oxysterols receptor LXR-beta - Group: Receptor

Treated with:

(3-{3-[2-chloro-3-(trifluoromethyl)benzyl](2,2-  
 diphenylethyl)amino}propoxy)phenyl)acetic acid: experimental  
 small molecule (0 associated side effects)

benzenesulfonyl: experimental small molecule (0 associated side effects)  
n-(2,2,2-trifluoroethyl)-n-{4-[2,2,2-trifluoro-1-hydroxy-1-(trifluoromethyl)ethyl]phenyl}benzenesulfonamide: experimental small molecule (0 associated side effects)  
1,1,1,3,3,3-hexafluoro-2-{4-[(2,2,2-trifluoroethyl)amino]phenyl}propan-2-ol: experimental small molecule (0 associated side effects)

known side effects mediated through drugs targeting this protein:

\*\*\*\*\*  
\*\*\*\*\*

Choline transporter-like protein 4 - Group: Transporter

Treated with:

choline: approved, nutraceutical small molecule (0 associated side effects) For nutritional supplementation, also for treating dietary shortage or imbalance

known side effects mediated through drugs targeting this protein:

\*\*\*\*\*  
\*\*\*\*\*

Neuronal acetylcholine receptor subunit alpha-9 - Group: Channel

Treated with:

nicotine: approved small molecule (98 associated side effects)

For the relief of nicotine withdrawal symptoms and as an aid to smoking cessation.

galantamine: approved small molecule (160 associated side effects) For the treatment of mild to moderate dementia of the Alzheimer's type. Has also been investigated in patients with mild cognitive impairment who did not meet the diagnostic criteria for Alzheimer's disease.

213 known side effects mediated through drugs targeting this protein:

Abdominal discomfort Abdominal pain Acne Affect lability  
Aggression Agitation Amnesia Anaemia Anxiety  
Apathy Aphasia Apraxia Arrhythmia Arrhythmia  
supraventricular Arthralgia Arthritis Asthenia Ataxia  
Atrial fibrillation Atrioventricular block Back pain  
Bladder pain Blindness Blister Blood alkaline  
phosphatase increased Blood urea increased Body temperature  
increased Bone pain Bradycardia Bronchitis Bronchospasm  
Bundle branch block Cardiac failure Cardiac fibrillation  
Cardiovascular disorder Cataract Cerebrovascular  
accident Cerebrovascular disorder Chest discomfort Chest pain  
Coagulopathy Completed suicide Confusional state  
Constipation Convulsion Coordination abnormal Cough  
Cystitis Cystitis noninfective Decreased appetite  
Dehydration Delirium Dependence Depression Dermatitis  
Dermatitis bullous Diarrhoea Discomfort Disturbance in  
attention Disturbance in sexual arousal Diverticulitis  
Dizziness Drug abuse Drug dependence Dry mouth Dysgeusia  
Dysmenorrhoea Dyspepsia Dysphagia Dysphonia Dyspnoea

Ear pain    Electrocardiogram QT prolonged    Electrocardiogram  
 T wave inversion Epistaxis    Eye disorder    Eye irritation  
 Fatigue    Feeling abnormal Flat affect Flatulence Flushing  
 Gastric disorder Gastritis    Gastroenteritis    Gastrointestinal  
 haemorrhage Gastrointestinal pain Gravitational oedema    Haematuria  
 Haemoglobin Haemorrhage Hallucination    Headache    Hepatic  
 enzyme increased Hepatitis    Hepatobiliary disease    Hiccups  
 Hyperglycaemia    Hyperhidrosis    Hyperkinesia  
 Hypersensitivity Hypersomnia Hypertension    Hypertonia  
 Hypoaesthesia    Hypokalaemia    Hypokinesia Hypotension Ill-  
 defined disorder Immune system disorder Incontinence    Increased  
 appetite    Increased bronchial secretion    Infarction Infection  
 Influenza    Insomnia    Irritability    Ischaemia    Lacrimation  
 increased Lethargy    Libido increased Liver disorder    Loss of  
 consciousness    Lower gastrointestinal haemorrhage Malaise  
 Melaena    Menstrual disorder    Mental disability Mental  
 disorder    Migraine    Mood swings Muscle contractions involuntary  
 Muscle spasms    Musculoskeletal discomfort    Musculoskeletal  
 disorder    Myalgia    Myocardial ischaemia    Nasal congestion Nasal  
 discomfort    Nasal ulcer Nasopharyngitis    Nausea    Nephrolithiasis  
 Nervous system disorder    Nervousness Neuropathy peripheral  
 Nightmare    Nocturia    Oedema    Oedema peripheral Oesophageal  
 disorder    Oesophageal perforation    Orthostatic hypotension  
 Pain    Pain in extremity Pain in jaw Palpitations  
 Paraesthesia    Paranoia    Pharyngitis Pneumonia    Pollakiuria  
 Pruritus    Purpura    Rash    Rectal haemorrhage    Renal  
 failure    Respiratory disorder    Respiratory tract infection  
 Rhinitis    Rhinorrhoea Salivary hypersecretion    Sensory  
 loss    Shock Sinusitis    Sleep disorder    Sneezing    Somnolence  
 Sputum increased Stomatitis    Suicidal ideation Suicide attempt  
 Supraventricular tachycardia Syncope    Tachycardia Tension  
 Throat irritation Thrombocytopenia Thrombocytosis    Tinnitus  
 Tobacco user    Tooth disorder    Transient ischaemic attack  
 Tremor    Ulcer Upper respiratory tract infection Urethral  
 disorder    Urinary incontinence    Urinary retention Urinary tract  
 disorder    Urinary tract infection    Vascular dementia Vascular  
 purpura    Ventricular tachycardia    Vertigo    Vision blurred  
 Visual acuity reduced    Visual impairment Vomiting    Weight  
 decreased    Weight increased Withdrawal syndrome

\*\*\*\*\*  
 \*\*\*\*\*

Basement membrane-specific heparan sulfate proteoglycan core protein  
 - Group: Other  
 Treated with:  
 palifermin: approved    biotech    (0 associated side effects) For  
 treatment of oral mucositis associated with chemotherapy and  
 radiation therapy.

known side effects mediated through drugs targeting this protein:

\*\*\*\*\*  
 \*\*\*\*\*

Vitamin B12 transporter btuB - Group: Transporter  
 Treated with:

3-oxo-pentadecanoic acid: experimental small molecule (0 associated side effects)  
lauryl dimethylamine-n-oxide: experimental small molecule (0 associated side effects)  
(hydroxyethyloxy)tri(ethyloxy)octane: experimental small molecule (0 associated side effects)

known side effects mediated through drugs targeting this protein:

\*\*\*\*\*  
\*\*\*\*\*

Basic fibroblast growth factor receptor 1 - Group: Enzyme

Treated with:

palifermin: approved biotech (0 associated side effects) For treatment of oral mucositis associated with chemotherapy and radiation therapy.

su4984: experimental small molecule (0 associated side effects)

3-(3-methoxybenzyl)-1h-pyrrolo[2,3-b]pyridine: experimental small molecule (0 associated side effects)

(e)-[4-(3,5-difluorophenyl)-3h-pyrrolo[2,3-b]pyridin-3-ylidene](3-methoxyphenyl)methanol: experimental small molecule (0 associated side effects)

3-[(3-(2-carboxyethyl)-4-methylpyrrol-2-yl)methylene]-2-indolinone: experimental small molecule (0 associated side effects)

known side effects mediated through drugs targeting this protein:

\*\*\*\*\*  
\*\*\*\*\*

Thromboxane A2 receptor - Group: Receptor

Treated with:

ridogrel: approved small molecule (0 associated side effects)

Used as an adjunctive therapy to induce thrombolysis in patients suffering acute myocardial infarction.

known side effects mediated through drugs targeting this protein:

\*\*\*\*\*  
\*\*\*\*\*

Follicle-stimulating hormone receptor - Group: Receptor

Treated with:

menotropins: approved biotech (0 associated side effects) For the treatment of female infertility

follitropin beta: approved biotech (0 associated side effects) For treatment of female infertility

urofollitropin: approved biotech (91 associated side effects) For treatment of female infertility

choriogonadotropin alfa: approved biotech (0 associated side effects) For the treatment of female infertility

suramin: approved small molecule (0 associated side effects)

For treatment of human sleeping sickness, onchocerciasis and other diseases caused by trypanosomes and worms.

91 known side effects mediated through drugs targeting this protein:

Abdominal discomfort    Abdominal distension    Abdominal pain  
 Abnormal faeces    Acne    Affect lability    Anxiety    Arthropathy  
 Back pain    Bladder pain    Body temperature increased  
 Breast tenderness    Bronchitis    Cervix disorder    Chest pain  
 Complication of pregnancy    Conjunctivitis    Constipation  
 Cough    Cystitis    Cystitis noninfective    Dehydration    Dermatitis  
 Dermatitis exfoliative    Diarrhoea    Discomfort    Dizziness  
 Dysmenorrhoea    Dystonia    Emotional distress    Endocrine  
 disorder    Feeling abnormal    Fungal infection    Gastric disorder  
 Gastrointestinal pain    Headache    Herpes simplex    Herpes  
 virus infection    Herpes zoster    Hordeolum    Hormone level abnormal  
 Hot flush    Hyperhidrosis    Hypersensitivity    Hypertension  
 Ill-defined disorder    Incontinence    Infection    Influenza  
 Injection site haemorrhage    Injection site pain    Injection  
 site reaction    Insomnia    Malaise    Melaena    Menopausal  
 symptoms    Metrorrhagia    Mood swings    Muscle spasms    Nasal  
 congestion    Nausea    Neck pain    Nephrolithiasis    Oedema  
 Osteoarthritis    Ovarian disorder    Ovarian hyperstimulation  
 syndrome    Pain    Pelvic pain    Pollakiuria    Pruritus    Rash    Respiratory  
 disorder    Rhinitis    Sinusitis    Skin disorder    Tachycardia  
 Tenderness    Throat irritation    Thrombosis    Urinary incontinence  
 Urinary tract infection    Uterine disorder    Uterine spasm  
 Vaginal discharge    Vaginal haemorrhage    Vaginal infection  
 Vaginal inflammation    Vomiting    Vulvovaginal pruritus  
 Weight increased

\*\*\*\*\*  
 \*\*\*\*\*

Cholecystokinin type A receptor - Group: Receptor

Treated with:

ceruletide: approved    small molecule    (0 associated side effects)  
 Caerulein stimulates gastric, biliary, and pancreatic  
 secretion; and certain smooth muscle. As such, it is used in  
 paralytic ileus and as diagnostic aid in pancreatic malfunction.

known side effects mediated through drugs targeting this protein:

\*\*\*\*\*  
 \*\*\*\*\*

Gamma-aminobutyric acid type B receptor, subunit 2 - Group: Receptor

Treated with:

baclofen: approved    small molecule    (192 associated side  
 effects)    For the alleviation of signs and symptoms of spasticity  
 resulting from multiple sclerosis, particularly for the relief of  
 flexor spasms and concomitant pain, clonus, and muscular rigidity.

192 known side effects mediated through drugs targeting this  
 protein:

Abdominal pain    Accommodation disorder    Affect lability    Ageusia  
 Agitation    Akathisia    Albuminuria    Alopecia    Amnesia  
 Anaemia    Anxiety    Apnoea    Arachnoiditis    Arrhythmia  
 Aspartate aminotransferase increased    Aspiration    Asthenia  
 Ataxia    Autonomic nervous system imbalance    Back pain  
 Bladder pain    Bladder spasm    Blindness    Blood alkaline  
 phosphatase increased    Body temperature decreased    Body temperature  
 increased    Bradycardia    Cardiac output decreased    Cerebral

ischaemia Chest pain Chills Coma Completed suicide Confusional  
 state Constipation Conversion disorder Convulsion  
 Coordination abnormal Death Decreased appetite Deep vein  
 thrombosis Dehydration Dependence Dermatitis contact Diarrhoea  
 Diplopia Discomfort Disorientation Dizziness Drug  
 dependence Drug ineffective Dry mouth Dysarthria Dyspepsia  
 Dysphagia Dysphoria Dyspnoea Dystonia Dysuria  
 Ejaculation disorder Embolism Enuresis Epilepsy  
 Erectile dysfunction Euphoric mood Eyelid ptosis Face  
 oedema Faecal incontinence Fatigue Feeling abnormal  
 Flatulence Flushing Gait disturbance Gastroenteritis  
 Gastrointestinal disorder Gastrointestinal haemorrhage  
 Gastrointestinal pain Haematochezia Haematuria Haemoglobin  
 Haemorrhage Hallucination Headache Hyperglycaemia  
 Hyperhidrosis Hypertension Hypertonia Hyperventilation  
 Hypoaesthesia Hyporeflexia Hypotension Hypothermia  
 Hypotonia Hypoventilation Hypoxia Ileus Ill-defined  
 disorder Incontinence Infection Influenza Insomnia  
 Ischaemia Joint swelling Leiomyoma Lethargy  
 Leukocytosis Loss of consciousness Major depression  
 Malaise Meningitis Mental disability Mental disorder  
 Miosis Mood swings Muscle relaxant therapy Muscle  
 twitching Muscular weakness Musculoskeletal discomfort  
 Musculoskeletal stiffness Myalgia Mydriasis Nasal  
 congestion Nausea Neoplasm malignant Nephrolithiasis  
 Nightmare Nocturia Nuchal rigidity Nystagmus Oedema  
 Oedema peripheral Oliguria Opisthotonus Orthostatic  
 hypotension Osteoarthritis Pallor Palpitations  
 Paraesthesia Paranoia Personality disorder Petechiae  
 Photophobia Pneumonia Pneumonia aspiration Pollakiuria  
 Pruritus Psychotic disorder Pulmonary embolism  
 Pulmonary function test decreased Rash Renal failure  
 Respiratory depression Respiratory disorder Respiratory  
 failure Respiratory rate decreased Retching Rhinitis  
 Salivary hypersecretion Sedation Sensory loss  
 Sexual dysfunction Shock Skin ulcer Somnolence Speech  
 disorder Strabismus Syncope Tachycardia Thinking abnormal  
 Thrombophlebitis Thrombosis Tinnitus Tongue disorder  
 Tremor Ulcer Urinary incontinence Urinary retention  
 Urticaria Uterine leiomyoma Uterovaginal prolapse Vaginal  
 infection Vaginal inflammation Vasodilation procedure Venous  
 thrombosis Ventricular arrhythmia Vision blurred Visual acuity  
 reduced Visual impairment Vomiting Weight decreased Weight  
 increased Wound dehiscence

\*\*\*\*\*  
 \*\*\*\*\*

Somatostatin receptor type 5 - Group: Receptor

Treated with:

octreotide: approved small molecule (0 associated side effects)

For treatment of acromegaly and reduction of side effects from cancer chemotherapy

vapreotide: approved small molecule (0 associated side effects)

For the treatment of esophageal variceal bleeding in patients with cirrhotic liver disease and has also shown efficacy in the treatment of patients with AIDS-related diarrhea.

known side effects mediated through drugs targeting this protein:

\*\*\*\*\*  
\*\*\*\*\*

5-hydroxytryptamine 3 receptor - Group: Channel

Treated with:

ziprasidone: approved small molecule (251 associated side effects) For the treatment of schizophrenia and related psychotic disorders.

olanzapine: approved small molecule (393 associated side effects) For the acute and maintenance treatment of schizophrenia and related psychotic disorders, as well as acute treatment of manic or mixed episodes of bipolar 1 disorder. Intramuscular olanzapine is indicated for the rapid control of agitated patients.

clozapine: approved small molecule (228 associated side effects) For use in patients with treatment-resistant schizophrenia.

mirtazapine: approved small molecule (272 associated side effects) For the treatment of major depressive disorder.

palonosetron: approved small molecule (93 associated side effects) For the prevention of acute and delayed nausea and vomiting associated with initial and repeat courses of moderately emetogenic cancer chemotherapy, as well as prevention of acute nausea and vomiting associated with highly emetogenic cancer chemotherapy. Also used for the prevention of postoperative nausea and vomiting for up to 24 hours post operation.

cisapride: approved,withdrawn small molecule (0 associated side effects) For the symptomatic treatment of adult patients with nocturnal heartburn due to gastroesophageal reflux disease.

procaine: approved small molecule (43 associated side effects) Used as a local anesthetic primarily in oral surgery

rocuronium: approved small molecule (25 associated side effects) For inpatients and outpatients as an adjunct to general anesthesia to facilitate both rapid sequence and routine tracheal intubation, and to provide skeletal muscle relaxation during surgery or mechanical ventilation.

dolasetron: approved small molecule (137 associated side effects) For the prevention of nausea and vomiting associated with emetogenic cancer chemotherapy, including initial and repeat courses of chemotherapy. Also used for the prevention of postoperative nausea and vomiting. This drug can be used intravenously for the treatment of postoperative nausea and vomiting.

granisetron: approved small molecule (51 associated side effects) For the prevention of nausea and vomiting associated with initial and repeat courses of emetogenic cancer therapy (including high dose cisplatin), postoperation, and radiation (including total body irradiation and daily fractionated abdominal radiation).

ondansetron: approved small molecule (122 associated side effects) For the prevention of nausea and vomiting associated with emetogenic cancer chemotherapy, postoperation, and radiation. Also used for the treatment of postoperative nausea and vomiting.

alosecron: approved,withdrawn small molecule (101 associated side effects) Only for the treatment of symptoms of severe diarrhea-predominant irritable bowel syndrome (IBS) in women with

chronic symptoms (generally lasting greater than 6 months) who does not present with anatomic or biochemical GI abnormalities and have not responded to conventional therapy.

memantine: approved small molecule (250 associated side effects) For the treatment of moderate to severe dementia of the Alzheimer's type.

chloroprocaine: approved small molecule (34 associated side effects) For the production of local anesthesia by infiltration and peripheral nerve block. They are not to be used for lumbar or caudal epidural anesthesia.

tubocurarine: approved small molecule (0 associated side effects) Used as a diagnosis agent for myasthenia gravis, and also to facilitate the intubation after induction of anesthesia in surgical procedure

quetiapine: approved small molecule (359 associated side effects) For the treatment of schizophrenia and related psychotic disorders.

aripiprazole: approved small molecule (630 associated side effects) For the treatment of schizophrenia and related psychotic disorders.

921 known side effects mediated through drugs targeting this protein:

Abasia Abdominal discomfort Abdominal distension Abdominal pain Abdominal pain lower Abdominal pain upper Abdominal tenderness Abnormal dreams Abnormal faeces Abscess Accommodation disorder Acidosis Acne Activated partial thromboplastin time prolonged Acute abdomen Acute coronary syndrome Acute psychosis Affect lability Ageusia Aggression Agitation Agoraphobia Agranulocytosis Akathisia Akinesia Alanine aminotransferase increased Albuminuria Alcohol intolerance Alkalosis Alopecia Altered state of consciousness Amblyopia Amenorrhoea Amnesia Amyotrophic lateral sclerosis Anaemia Anaemia macrocytic Anaphylactic shock Anaphylactoid reaction Anger Angina pectoris Angioedema Angiopathy Angle closure glaucoma Anorgasmia Antisocial behaviour Antisocial personality disorder Anxiety Aortic dissection Apathy Aphasia Aphthous stomatitis Aplasia Aplastic anaemia Apnoea Appendicitis Arachnoiditis Arrhythmia Arrhythmia supraventricular Arteritis Arthralgia Arthritis Arthropathy Asocial behaviour Aspartate aminotransferase increased Asphyxia Aspiration Asthenia Asthma Ataxia Atelectasis Atrial fibrillation Atrial flutter Atrioventricular block first degree Atrioventricular block second degree Azotaemia Back pain Balance disorder Basophilia Benign prostatic hyperplasia Bladder pain Blepharitis Blepharospasm Blindness Blindness transient Blister Blood acid phosphatase increased Blood alkaline phosphatase increased Blood bilirubin abnormal Blood bilirubin increased Blood cholesterol increased Blood creatine phosphokinase increased Blood creatinine increased Blood glucose decreased Blood glucose increased Blood insulin increased Blood lactate dehydrogenase increased Blood potassium decreased Blood potassium increased Blood pressure abnormal Blood pressure diastolic decreased



Blood pressure fluctuation Blood pressure increased Blood  
 pressure systolic decreased Blood prolactin increased Blood  
 triglycerides increased Blood triglycerides normal Blood urea  
 increased Blood uric acid increased Blood urine Blood urine  
 present Blunted affect Body temperature decreased Body  
 temperature increased Bone pain Bradycardia Bradykinesia  
 Bradyphrenia Breast disorder Breast engorgement  
 Breast enlargement Breast feeding Breast pain Breath  
 sounds abnormal Bronchitis Bronchopneumopathy Bronchospasm  
 Bruxism Buccoglossal syndrome Bundle branch block  
 Burning sensation Bursitis Calculus urinary Candidiasis  
 Carbohydrate tolerance decreased Cardiac arrest Cardiac  
 disorder Cardiac failure Cardiac failure congestive Cardiac  
 fibrillation Cardiac flutter Cardiac murmur Cardiac output  
 decreased Cardio-respiratory arrest Cardiomegaly  
 Cardiomyopathy Cardiopulmonary failure Cardiovascular  
 disorder Carpal tunnel syndrome Cataplexy Cataract Catatonia  
 Cells in urine Cellulitis Cerebral artery embolism  
 Cerebral haemorrhage Cerebral infarction Cerebral  
 ischaemia Cerebrovascular accident Cervicitis Chapped lips  
 Cheilitis Chest discomfort Chest pain Chills  
 Cholecystitis Cholelithiasis Cholestasis Choreoathetosis  
 Chronic obstructive pulmonary disease Clonus Coccydynia  
 Cognitive disorder Cogwheel rigidity Cold sweat Colitis  
 Colitis ischaemic Colitis ulcerative Coma Completed suicide  
 Condition aggravated Confusional state Conjunctival  
 haemorrhage Conjunctivitis Connective tissue disorder  
 Constipation Convulsion Coordination abnormal Corneal  
 lesion Corneal opacity Costochondritis Cough Crocodile tears  
 syndrome Crying Cyanosis Cystitis Cystitis noninfective  
 Deafness Deafness transitory Death Decreased appetite  
 Decubitus ulcer Deep vein thrombosis Deficiency anaemia  
 Dehydration Delirium Delusion Dementia Dental caries  
 Dependence Depersonalisation Depressed level of consciousness  
 Depression Depressive symptom Derealisation Dermal cyst  
 Dermatitis atopic Dermatitis bullous Dermatitis contact  
 Dermatitis exfoliative Diabetes mellitus Diabetic coma  
 Diabetic hyperglycaemic coma Diabetic hyperosmolar coma  
 Diabetic ketoacidosis Diarrhoea Diplopia Discomfort  
 Disease progression Disorientation Dissociation  
 Disturbance in attention Disturbance in sexual arousal  
 Diverticulitis Dizziness Dizziness exertional Dizziness  
 postural Drooling Drug abuse Drug dependence Drug eruption  
 Drug interaction Dry eye Dry mouth Dry skin Dry throat  
 Duodenal ulcer Dysarthria Dysgeusia Dyskinesia  
 Dysmenorrhoea Dyspepsia Dysphagia Dysphemia Dysphonia  
 Dysphoria Dyspnoea Dystonia Dysuria Ear disorder  
 Ear infection Ear pain Ecchymosis Eczema Effusion  
 Ejaculation disorder Elastosis perforans Electrocardiogram  
 QT prolonged Electrocardiogram ST segment Electrocardiogram ST  
 segment depression Electrocardiogram ST segment elevation  
 Electrocardiogram T wave amplitude decreased Electrocardiogram  
 T wave inversion Electrocardiogram abnormal Electrocardiogram  
 change Electrocardiogram normal Electroencephalogram  
 abnormal Embolism Encephalopathy Endocrine disorder

Energy increased Enteritis Enuresis Eosinophilia  
 Epididymitis Epilepsy Epistaxis Erectile dysfunction  
 Eructation Erythema Erythema multiforme Euphoric mood  
 Exfoliative rash Exostosis Extrapyrarnidal disorder  
 Extrasystoles Eye discharge Eye disorder Eye  
 haemorrhage Eye infection Eye inflammation Eye irritation Eye  
 pain Eye swelling Eyelid disorder Eyelid function disorder  
 Eyelid oedema Eyelid ptosis Face oedema Facial pain  
 Facial paresis Faecal incontinence Faecalith Faecaloma  
 Faeces hard Fasting Fatigue Fear Feeling abnormal  
 Feeling cold Feeling hot Feeling jittery Feeling of body  
 temperature change Female sexual dysfunction Flank pain Flat  
 affect Flatulence Fluid overload Fluid retention Flushing  
 Foetor hepaticus Folliculitis Formication Fungal infection  
 Fungal skin infection Furuncle Gait disturbance  
 Galactorrhoea Gamma-glutamyltransferase increased  
 Gastric disorder Gastric pH decreased Gastric ulcer  
 Gastric ulcer haemorrhage Gastritis Gastroduodenitis  
 Gastroenteritis Gastrointestinal disorder Gastrointestinal  
 haemorrhage Gastrointestinal obstruction Gastrointestinal pain  
 Gastroesophageal reflux disease Generalised oedema  
 Genital discharge Genital disorder female Gingival bleeding  
 Gingival pain Gingivitis Glaucoma Glossitis Glossodynia  
 Glucose tolerance decreased Glucose tolerance impaired  
 Glycosuria Glycosylated haemoglobin increased Goitre Gout  
 Grand mal convulsion Gravitational oedema Groin pain  
 Gynaecomastia Haematemesis Haematochezia Haematocrit  
 decreased Haematoma Haematuria Haemoglobin Haemoglobin decreased  
 Haemoglobin increased Haemolysis Haemoptysis Haemorrhage  
 Haemorrhage intracranial Haemorrhage urinary tract  
 Haemorrhoids Hallucination Hallucination, auditory  
 Hallucination, visual Hangover Head discomfort Headache  
 Hearing impaired Heart disease congenital Heart rate  
 irregular Hemiparesis Hemiplegia Hepatic cirrhosis Hepatic enzyme  
 increased Hepatic failure Hepatic function abnormal Hepatic  
 necrosis Hepatic steatosis Hepatitis Hepatitis cholestatic  
 Hepatobiliary disease Hepatocellular injury Hepatomegaly  
 Hernia Herpes simplex Herpes virus infection Herpes  
 zoster Hiccups Hirsutism Homicidal ideation Hormone  
 level abnormal Hostility Hot flush Hyperacusis Hyperaemia  
 Hyperaesthesia Hyperbilirubinaemia Hyperchloraemia  
 Hyperchlorhydria Hypercholesterolaemia Hyperglycaemia  
 Hyperhidrosis Hyperinsulinism Hyperkalaemia  
 Hyperkeratosis Hyperkinesia Hyperlipidaemia  
 Hypernatraemia Hyperparathyroidism Hyperplasia  
 Hyperreflexia Hypersensitivity Hypersomnia Hypertension  
 Hyperthermia Hyperthyroidism Hypertonia  
 Hypertriglyceridaemia Hypertrophy Hyperuricaemia  
 Hyperventilation Hypoaesthesia Hypoaesthesia oral  
 Hypocalcaemia Hypochloraemia Hypocholesterolaemia  
 Hypochromic anaemia Hypoglycaemia Hypokalaemia  
 Hypokinesia Hypomagnesaemia Hypomania Hypomenorrhoea  
 Hyponatraemia Hypophagia Hypopituitarism Hypoproteinaemia  
 Hyporeflexia Hypotension Hypothermia Hypothyroidism  
 Hypotonia Hypoventilation Hypoxia Idiopathic

thrombocytopenic purpura Ileus Ileus paralytic Ill-defined  
 disorder Immune system disorder Impaired healing Inappropriate  
 antidiuretic hormone secretion Incontinence Increased  
 appetite Increased bronchial secretion Induration Infarction  
 Infection Infestation Inflammation Influenza Inguinal  
 hernia Injection site mass Injection site pain Injection  
 site reaction Insomnia Intention tremor Intentional self-  
 injury Intermittent claudication International normalised  
 ratio increased Interstitial lung disease Intestinal functional  
 disorder Intestinal ischaemia Intestinal obstruction Intestinal  
 perforation Intussusception Iron deficiency Iron deficiency  
 anaemia Irritability Irritable bowel syndrome Ischaemia  
 Ischaemic stroke Jaundice Jaundice cholestatic Joint  
 contracture Joint range of motion decreased Joint stiffness Joint  
 swelling Judgement impaired Keratitis Ketoacidosis  
 Ketosis Lacrimal disorder Lacrimation increased Laryngeal  
 oedema Laryngitis Laryngospasm Left ventricular failure  
 Leiomyoma Lens disorder Lenticular opacities Lenticular  
 pigmentation Lethargy Leukocytosis Leukoderma Leukopenia  
 Leukoplakia oral Libido decreased Libido increased Lip dry  
 Liver disorder Liver function test abnormal Local reaction  
 Logorrhoea Loss of consciousness Loss of libido Lower  
 respiratory tract infection Lymphadenopathy Lymphocytosis  
 Lymphoedema Macular degeneration Macule Major depression  
 Malaise Male sexual dysfunction Mania Masked facies  
 Mastitis Mediastinal disorder Melaena Memory impairment  
 Meningism Menopausal symptoms Menorrhagia Menstrual  
 disorder Menstruation irregular Mental disability Mental disorder  
 Mental disorder due to a general medical condition Mental  
 retardation Mental status changes Metabolic acidosis  
 Metrorrhagia Micturition urgency Migraine Miosis  
 Mitral valve incompetence Mobility decreased Monocytosis  
 Mood swings Motion sickness Mouth ulceration Movement disorder  
 Muscle contractions involuntary Muscle contracture  
 Muscle enzyme increased Muscle relaxant therapy  
 Muscle rigidity Muscle spasms Muscle spasticity Muscle  
 tightness Muscle twitching Muscular weakness Musculoskeletal chest  
 pain Musculoskeletal discomfort Musculoskeletal pain  
 Musculoskeletal stiffness Myalgia Myasthenic syndrome  
 Mydriasis Myocardial infarction Myocardial ischaemia  
 Myocarditis Myoclonus Myopathy Myopia Myositis Nail  
 disorder Nasal congestion Nasal discomfort Nasal disorder Nasal  
 dryness Nasopharyngitis Nausea Neck pain Necrosis  
 Nephritis Nephrolithiasis Nervous system disorder  
 Nervousness Neuralgia Neurodermatitis Neuroleptic malignant  
 syndrome Neuropathy peripheral Neurosis Neutropenia Neutrophil  
 count decreased Neutrophil count increased Night sweats  
 Nightmare Nocturia Nodal arrhythmia Normochromic  
 normocytic anaemia Nuchal rigidity Nystagmus Obesity  
 Obsessive thoughts Obstruction Ocular hyperaemia Oculogyric  
 crisis Oedema Oedema peripheral Oesophageal disorder  
 Oesophageal ulcer Oesophagitis Oliguria Onychomycosis  
 Opisthotonus Oral candidiasis Oral pain Orchitis  
 noninfective Oropharyngeal discomfort Oropharyngeal pain  
 Oropharyngeal spasm Orthostatic hypotension

|                                         |                                   |                                |                           |                        |          |
|-----------------------------------------|-----------------------------------|--------------------------------|---------------------------|------------------------|----------|
|                                         | Osteoarthritis                    | Osteopenia                     | Osteoporosis              | Osteoporotic           |          |
| fracture                                | Otitis externa                    | Otitis media                   | Ovarian cyst              | Pain                   |          |
|                                         | Pain in extremity                 | Pain in jaw                    | Pallor                    | Palpitations           |          |
|                                         | Pancreatic disorder               | Pancreatitis                   | Pancreatitis acute        |                        |          |
|                                         | Pancytopenia                      | Panic attack                   | Panic disorder            | Panic                  |          |
| disorder with agoraphobia               | Panic reaction                    | Paraesthesia oral              |                           |                        |          |
|                                         | Paralysis                         | Paranoia                       | Parkinsonian gait         | Parosmia               |          |
|                                         | Pathological fracture             | Pelvic pain                    | Peptic ulcer              | Pericardial            |          |
| effusion                                | Pericarditis                      | Periodontitis                  | Periorbital oedema        |                        |          |
|                                         | Peripheral ischaemia              | Personality disorder           | Petechiae                 |                        |          |
|                                         | Pharyngeal erythema               | Pharyngitis                    | Phlebitis                 | Phobia                 |          |
|                                         | Phonological disorder             | Photophobia                    | Photopsia                 | Photosensitivity       |          |
| reaction                                | Platelet count decreased          | Pleural disorder               | Pleural                   |                        |          |
| effusion                                | Pneumonia                         | Pneumonia aspiration           | Pneumothorax              |                        |          |
|                                         | Poisoning                         | Pollakiuria                    | Polycythaemia             | Polydipsia             | Polyuria |
|                                         | Premature ejaculation             | Premenstrual syndrome          | Presyncope                |                        |          |
|                                         | Priapism                          | Proctitis                      | Productive cough          | Prostatitis            | Protein  |
| urine present                           | Proteinuria                       | Prothrombin level increased    | Protrusion                |                        |          |
| tongue                                  | Pruritus                          | Pruritus generalised           | Pruritus genital          |                        |          |
|                                         | Pseudocholinesterase deficiency   | Psoriasis                      | Psychiatric               |                        |          |
| symptom                                 | Psychomotor retardation           | Psychotic disorder             |                           |                        |          |
|                                         | Pulmonary congestion              | Pulmonary embolism             | Pulmonary oedema          |                        |          |
|                                         | Purpura                           | Pyelonephritis                 | Pyuria                    | Rash erythematous      | Rash     |
| maculo-papular                          | Rash papular                      | Rash pustular                  | Rash vesicular            |                        |          |
|                                         | Rectal haemorrhage                | Red blood cell count decreased | Red                       |                        |          |
| blood cell sedimentation rate increased | Reflux oesophagitis               |                                |                           |                        |          |
|                                         | Regressive behaviour              | Regurgitation                  | Renal failure             | Renal                  |          |
| failure acute                           | Renal function test abnormal      | Renal impairment               |                           |                        |          |
|                                         | Respiration abnormal              | Respiratory alkalosis          | Respiratory               |                        |          |
| arrest                                  | Respiratory disorder              | Respiratory distress           | Respiratory               |                        |          |
| failure                                 | Respiratory tract congestion      | Respiratory tract infection    |                           |                        |          |
|                                         | Respiratory tract infection viral | Restless legs syndrome         |                           |                        |          |
|                                         | Retching                          | Retinal detachment             | Retinal haemorrhage       |                        |          |
|                                         | Rhabdomyolysis                    | Rheumatoid arthritis           | Rhinitis                  | Rhinitis               |          |
| allergic                                | Rhinitis seasonal                 | Rhinorrhoea                    | Rhonchi                   | Rosacea                |          |
|                                         | Salivary gland enlargement        | Salivary hypersecretion        | Scab                      |                        |          |
|                                         | Schizoaffective disorder          | Schizophreniform disorder      |                           |                        |          |
|                                         | Sciatica                          | Scotoma                        | Seasonal allergy          | Seborrhoeic dermatitis |          |
|                                         | Sedation                          | Sensation of heaviness         | Sensory loss              | Sepsis                 |          |
|                                         | Septic shock                      | Sexual dysfunction             | Shock                     | Sinus arrhythmia       |          |
|                                         | Sinus bradycardia                 | Sinus congestion               | Sinus disorder            | Sinus                  |          |
| headache                                | Sinus tachycardia                 | Sinusitis                      | Skin discolouration       | Skin                   |          |
| disorder                                | Skin hypertrophy                  | Skin infection                 | Skin irritation           | Skin                   |          |
| ulcer                                   | Sleep apnoea syndrome             | Sleep disorder                 | Sleep talking             |                        |          |
|                                         | Sluggishness                      | Sneezing                       | Social avoidant behaviour |                        |          |
|                                         | Somnambulism                      | Somnolence                     | Speech disorder           | Sputum increased       |          |
|                                         | Status epilepticus                | Stevens-Johnson syndrome       | Stomatitis                |                        |          |
|                                         | Stridor                           | Stupor                         | Subarachnoid haemorrhage  | Subdural               |          |
| haematoma                               | Sudden death                      | Suicidal ideation              | Suicide attempt           |                        |          |
|                                         | Supraventricular extrasystoles    | Supraventricular tachycardia   |                           |                        |          |
|                                         | Suspiciousness                    | Swelling                       | Swelling face             | Swollen tongue         |          |
|                                         | Syncope                           | Tachyarrhythmia                | Tachycardia               | Tardive dyskinesia     |          |
|                                         | Tenderness                        | Tendonitis                     | Tenosynovitis             | Tension headache       |          |
|                                         | Testicular pain                   | Thinking abnormal              | Thirst                    | Thought blocking       |          |
|                                         | Throat irritation                 | Throat tightness               | Thrombocytopenia          |                        |          |

Thrombocytopenic purpura      Thrombocytosis      Thrombophlebitis  
Thrombosis      Thrombotic thrombocytopenic purpura      Thyroiditis  
Tic      Tinnitus      Tongue discolouration      Tongue disorder  
Tongue dry      Tongue oedema      Tongue paralysis      Tongue spasm  
Tonsillar hypertrophy      Tooth abscess      Tooth disorder      Tooth  
impacted      Tooth infection      Toothache      Torsade de pointes  
Torticollis      Toxic epidermal necrolysis      Transaminases  
increased      Transient ischaemic attack      Tremor      Trismus  
Tuberculin test positive      Tubulointerstitial nephritis      Type  
I hypersensitivity      Ulcer      Ulcer haemorrhage      Unintended pregnancy  
Upper respiratory tract infection      Urethral disorder      Urethritis  
Urinary hesitation      Urinary incontinence      Urinary retention  
Urinary tract disorder      Urinary tract infection      Urine  
output increased      Urosepsis      Urticaria      Uterine disorder      Uterine  
haemorrhage      Uterine leiomyoma      Uterovaginal prolapse      VIIIth nerve  
paralysis      Vaginal discharge      Vaginal haemorrhage      Vaginal infection  
Vaginal inflammation      Varicose vein      Vascular dementia  
Vascular headache      Vascular purpura      Vascular resistance  
pulmonary increased      Vascular resistance systemic      Vasculitis  
Vasodilation procedure      Vein discolouration      Venous thrombosis  
Ventricular arrhythmia      Ventricular extrasystoles      Ventricular  
fibrillation      Ventricular tachycardia      Vertigo      Viral  
diarrhoea      Viral infection      Vision blurred      Visual acuity reduced  
Visual impairment      Vomiting      Vulvovaginal candidiasis  
Vulvovaginal mycotic infection      Vulvovaginal pruritus  
Vulvovaginitis      Water intoxication      Weight decreased  
Weight fluctuation      Weight increased      Wheezing      White blood  
cell count decreased      White blood cell count increased      White blood  
cells urine positive      Withdrawal syndrome      Xerophthalmia  
Xerosis

\*\*\*\*\*  
\*\*\*\*\*

Taste receptor type 1 member 2 - Group: Receptor

Treated with:

aspartame: approved, nutraceutical small molecule (0 associated side effects)      Used as a diet supplement and sugar substitute.

known side effects mediated through drugs targeting this protein:

\*\*\*\*\*  
\*\*\*\*\*

Voltage-dependent T-type calcium channel subunit alpha-1G - Group: Channel

Treated with:

trimethadione: approved small molecule (0 associated side effects)      Used in the control of absence (petit mal) seizures that are refractory to treatment with other medications.

cinnarizine: approved small molecule (0 associated side effects)      For the treatment of vertigo/meniere's disease, nausea and vomiting, motion sickness and also useful for vestibular symptoms of other origins.

ethosuximide: approved small molecule (52 associated side effects)      For the treatment of petit mal epilepsy.

verapamil: approved small molecule (113 associated side effects) For the treatment of hypertension, angina, and cluster headache prophylaxis.

zonisamide: approved small molecule (190 associated side effects) For use as adjunctive treatment of partial seizures in adults with epilepsy.

mibefradil: withdrawn small molecule (0 associated side effects) For the treatment of angina and high blood pressure.

flunarizine: approved small molecule (0 associated side effects) Used in the prophylaxis of migraine, occlusive peripheral vascular disease, vertigo of central and peripheral origin, and as an adjuvant in the therapy of epilepsy.

methsuximide: approved small molecule (45 associated side effects) For the control of absence (petit mal) seizures that are refractory to other drugs.

275 known side effects mediated through drugs targeting this protein:

Abdominal discomfort Abdominal pain Abdominal pain upper  
Abnormal dreams Acne Acute coronary syndrome Aggression  
Agitation Agranulocytosis Alanine aminotransferase increased  
Albuminuria Alopecia Amblyopia Amenorrhoea Anaemia  
Anaphylactic shock Angioedema Anxiety Apnoea  
Arthralgia Arthritis Aspartate aminotransferase increased  
Asthenia Ataxia Atrial fibrillation Atrioventricular  
block Atrioventricular block complete Atrioventricular  
dissociation Autoimmune disorder Balance disorder Bladder  
pain Blindness Blood lactate dehydrogenase increased Blood  
prolactin increased Body temperature increased Bradycardia  
Bronchospasm Calculus bladder Cardiac failure Cardiac  
fibrillation Cardiomyopathy Cerebrovascular accident Chest  
pain Cholangitis Cholecystitis Cholelithiasis Cholestasis  
Cognitive disorder Colitis Confusional state  
Conjunctivitis Constipation Convulsion Coordination  
abnormal Cough Deafness Decreased appetite Dehydration  
Depressed level of consciousness Depressive symptom  
Dermatitis Dermatitis bullous Diarrhoea Diplopia  
Discomfort Dissociation Disturbance in attention  
Disturbance in sexual arousal Dizziness Drug eruption  
Dry mouth Dry skin Duodenal ulcer Duodenitis Dysarthria  
Dysgeusia Dyskinesia Dyspepsia Dysphagia Dyspnoea  
Dystonia Dysuria Ecchymosis Eczema Electrocardiogram  
abnormal Embolism Emotional distress Encephalopathy  
Enuresis Eosinophilia Erectile dysfunction Erythema  
Erythema multiforme Euphoric mood Extrapyrmidal  
disorder Extrasystoles Face oedema Faecal incontinence  
Fatigue Feeling abnormal Feeling cold Flank pain  
Flatulence Flushing Gait disturbance Galactorrhoea  
Gastritis Gastroenteritis Gastrointestinal disorder  
Gastrointestinal pain Gingival bleeding Gingival hyperplasia  
Gingival hypertrophy Gingivitis Glaucoma Glossitis  
Gynaecomastia Haematemesis Haematuria Haemoglobin  
Haemoptysis Haemorrhage Hallucination, auditory Headache  
Hepatic enzyme increased Hepatitis Hiccups Hirsutism  
Hyperaemia Hyperaesthesia Hyperhidrosis Hyperkeratosis

Hyperkinesia      Hyperplasia Hyperprolactinaemia  
Hyperreflexia      Hypersensitivity Hypertension      Hypertonia  
Hypertrophic cardiomyopathy Hypertrophy Hypoaesthesia  
Hypoglycaemia      Hypokinesia Hyponatraemia      Hypotension  
Hypotonia      Ileus paralytic      Ill-defined disorder  
Immunodeficiency Incontinence      Infection      Influenza  
Insomnia      Intermittent claudication      Iritis  
Irritability      Jaundice      Jaundice cholestatic      Joint  
swelling      Laryngospasm      Lethargy      Leukopenia Libido decreased  
Libido increased Loss of consciousness Lymphadenopathy  
Macule      Malaise      Mastitis      Melaena      Menorrhagia  
Mental disability Microcytic anaemia      Micturition urgency  
Monocytosis Mouth ulceration Movement disorder Muscle fatigue  
Muscle relaxant therapy      Muscle rigidity      Muscle spasms  
Muscle twitching Muscular weakness Musculoskeletal discomfort  
Musculoskeletal stiffness      Myalgia      Myocardial infarction  
Myoclonus      Myopia      Nausea      Nervousness Neuritis  
Neuropathy peripheral Nocturia      Nuchal rigidity      Nystagmus  
Neurolyric crisis Oedema      Oedema peripheral Oesophagitis  
Oligomenorrhoea Orthostatic hypotension      Osteoarthritis  
Pain Palpitations      Pancytopenia      Paraesthesia  
Paraesthesia oral Paralysis      Paranoia      Parosmia      Periorbital  
oedema      Petechiae      Pharyngitis Photophobia Pollakiuria Polyuria  
Porphyria      Protein urine present      Proteinuria Pruritus  
Psychotic disorder      Pulmonary embolism      Pulmonary oedema  
Purpura      Quadriparesis      Rash      Rash maculo-papular      Rash  
pustular      Rectal haemorrhage      Respiratory failure      Respiratory  
tract infection Rhinitis      Scotoma      Sensory loss      Shock Sinus  
arrest      Sinusitis      Sleep disorder      Sleep terror      Somnolence  
Speech disorder Stomatitis Suicidal behaviour      Swelling  
Swollen tongue      Syncope      Systemic lupus erythematosus  
Tachycardia Tension      Thirst      Thrombocytopenia  
Thrombophlebitis Tinnitus      Tremor      Ulcer Upper respiratory  
tract infection Urinary incontinence Urinary retention Urine  
output increased Urticaria      VIIth nerve paralysis Vaginal  
haemorrhage Vascular insufficiency Vascular purpura Vasculitis  
Ventricular extrasystoles      Vertigo      Vision blurred  
Visual acuity reduced Visual impairment Vomiting      Weight  
decreased      Weight increased

\*\*\*\*\*  
\*\*\*\*\*

High affinity nerve growth factor receptor - Group: Enzyme

Treated with:

amitriptyline: approved small molecule (109 associated side effects) For the treatment of depression, chronic pain, irritable bowel syndrome, sleep disorders, diabetic neuropathy, agitation and insomnia, and migraine prophylaxis.

imatinib: approved small molecule (248 associated side effects) For the treatment Philadelphia chromosome positive chronic myeloid leukemia (CML) and malignant gastrointestinal stromal tumors (GIST).

307 known side effects mediated through drugs targeting this protein:

Abdominal discomfort Abdominal distension Abdominal pain Acute  
 coronary syndrome Acute febrile neutrophilic dermatosis Acute  
 generalised exanthematous pustulosis Acute hepatic failure  
 Ageusia Agitation Agranulocytosis Alanine  
 aminotransferase increased Alopecia Alveolar proteinosis  
 Anaemia Angioedema Angiopathy Antinuclear antibody  
 positive Anxiety Aphagia Aplastic anaemia Apoptosis  
 Arrhythmia Arthralgia Arthritis Ascites Aspartate  
 aminotransferase increased Assisted fertilisation Asthenia  
 Ataxia Atrioventricular block Back pain Blister Blood  
 alkaline phosphatase increased Blood bilirubin increased Blood  
 creatine phosphokinase increased Blood creatinine increased Blood  
 disorder Blood lactate dehydrogenase increased Blood urea  
 increased Body temperature increased Bone marrow necrosis Bone  
 pain Brain oedema Breast enlargement Breast feeding  
 Calcinosis Cardiac disorder Cardiac failure Cardiac failure  
 congestive Cardiac hypertrophy Cardiac tamponade Cardiogenic shock  
 Cardiomyopathy Cell death Cerebral haemorrhage  
 Cerebrovascular accident Chest pain Chills Colitis  
 Coma Confusional state Conjunctival haemorrhage  
 Conjunctivitis Constipation Convulsion Coordination  
 abnormal Cough Cytogenetic abnormality Death Decreased  
 appetite Dehydration Delirium tremens Delusion Dependence  
 Dermatitis atopic Dermatitis bullous Dermatitis exfoliative  
 Diarrhoea Discomfort Disease progression Disorientation  
 Disturbance in attention Disturbance in sexual arousal  
 Diverticulitis Dizziness Drug dependence Drug interaction  
 Dry eye Dry mouth Dry skin Dysarthria Dysgeusia  
 Dyskinesia Dyspepsia Dyspnoea exertional Ecchymosis  
 Effusion Ehlers-Danlos syndrome Embolism Eosinophilia  
 Epistaxis Erectile dysfunction Erythema Erythema  
 multiforme Extrapyrmidal disorder Eye oedema Face oedema  
 Fatigue Febrile neutropenia Feeling abnormal Feeling  
 cold Fibrosis Flatulence Fluid retention Flushing  
 Galactorrhoea Gastric ulcer Gastritis Gastroenteritis  
 Gastrointestinal haemorrhage Gastrointestinal neoplasm  
 Gastrointestinal pain Gastrointestinal perforation  
 Gastrointestinal tract irritation Gastrooesophageal reflux  
 disease Generalised oedema Glaucoma Gout Gynaecomastia  
 Haematochezia Haematological malignancy Haematuria  
 Haemoglobin Haemorrhage Hallucination Headache Hepatic  
 enzyme increased Hepatic failure Hepatic necrosis Hepatitis  
 Herpes simplex Herpes virus infection Herpes zoster  
 Hyperhidrosis Hyperkalaemia Hyperplasia Hyperpyrexia  
 Hypersensitivity Hypertension Hypertrophy Hypoaesthesia  
 Hypokalaemia Hypomania Hyponatraemia Hypophosphataemia  
 Hypotension Ileus paralytic Ill-defined disorder  
 Immunosuppression Inappropriate antidiuretic hormone secretion  
 Infection Inflammation Influenza Insomnia  
 Interstitial lung disease Intestinal obstruction  
 Intracranial pressure increased Intraocular pressure  
 increased Irritability Jaundice Joint swelling Lacrimation  
 increased Left ventricular dysfunction Leukopenia Libido decreased  
 Liver disorder Loss of consciousness Lower respiratory  
 tract infection Lymphoma Lymphopenia Macular oedema Malaise



Mania Mastocytic leukaemia Mastocytoma Memory impairment  
 Menorrhagia Mental disability Mental status changes Metastatic  
 neoplasm Migraine Mouth ulceration Muscle rigidity Muscle  
 spasms Musculoskeletal discomfort Musculoskeletal disorder  
 Musculoskeletal pain Musculoskeletal stiffness Myalgia  
 Mydriasis Myelodysplastic syndrome Myeloproliferative  
 disorder Myocardial infarction Nail disorder Nasopharyngitis  
 Nausea Necrosis Necrosis ischaemic Neoplasm  
 malignant Nephropathy Nephropathy toxic Nephrotic syndrome  
 Neuroleptic malignant syndrome Neuropathy peripheral  
 Neutropenia Night sweats Nightmare Obstruction Oedema  
 Oedema peripheral Opportunistic infection Optic neuritis  
 Oropharyngeal discomfort Oropharyngeal pain Orthostatic  
 hypotension Osteoarthritis Osteonecrosis Ovarian disorder Pain  
 Palpitations Pancreatic disorder Pancreatitis  
 Pancytopenia Papilloedema Papilloma Paraesthesia  
 Parity Parotid gland enlargement Pericardial effusion  
 Pericarditis Periorbital oedema Peripheral coldness  
 Petechiae Pharyngitis Photosensitivity reaction  
 Pigmentation disorder Pleural disorder Pleural effusion  
 Pneumonia Pollakiuria Pruritus Psoriasis Pulmonary  
 fibrosis Pulmonary oedema Purpura Rash Rash vesicular Renal  
 failure Renal impairment Renal tubular disorder Respiratory tract  
 infection Retinal haemorrhage Rhinitis Sciatica Sensory  
 loss Sepsis Sexual dysfunction Sexually active Shock  
 Sinusitis Skin disorder Sleep disorder Somnolence  
 Stomatitis Swelling Syncope Systemic lupus erythematosus  
 Systemic mastocytosis Tachycardia Tardive dyskinesia  
 Tenderness Testicular disorder Testicular swelling  
 Thrombocytopenia Thrombosis Tinnitus Tongue discolouration  
 Toxic epidermal necrolysis Tremor Tumour lysis syndrome  
 Tumour necrosis Ulcer Upper respiratory tract infection  
 Urinary retention Urticaria Vaginal discharge Varicella  
 Vascular purpura Ventricular dysfunction Vertigo Viral  
 infection Vision blurred Vitreous haemorrhage Vomiting  
 Weight decreased Weight increased

\*\*\*\*\*  
\*\*\*\*\*

Inositol 1,4,5-trisphosphate receptor type 1 - Group: Receptor

Treated with:

d-myo-inositol-1,4,5-triphosphate: experimental small molecule  
(0 associated side effects)

glycerol: experimental small molecule (0 associated side  
effects)

known side effects mediated through drugs targeting this protein:

\*\*\*\*\*  
\*\*\*\*\*

ATP-sensitive inward rectifier potassium channel 8 - Group: Channel

Treated with:

phenformin: approved, withdrawn small molecule (0 associated  
side effects) For the reatment of type II diabetes mellitus.

levosimendan: approved small molecule (0 associated side  
effects) For short term treatment of acutely decompensated severe

chronic heart failure (CHF). Also being investigated for use/treatment in heart disease.

thiamylal: approved small molecule (0 associated side effects)

Used for the production of complete anaesthesia of short duration, for the induction of general anaesthesia, and for inducing a hypnotic state.

gliquidone: approved small molecule (0 associated side effects)

Used in the treatment of diabetes mellitus type 2.

glisoxepide: approved small molecule (0 associated side effects) For the treatment of diabetes mellitus type 2.

known side effects mediated through drugs targeting this protein:

\*\*\*\*\*  
\*\*\*\*\*

Gamma-aminobutyric-acid receptor subunit beta-3 - Group: Channel  
Treated with:

lorazepam: approved small molecule (126 associated side effects) For the management of anxiety disorders, and for treatment of status epilepticus.

ethchlorvynol: illicit,approved small molecule (0 associated side effects) Used for short-term hypnotic therapy in the management of insomnia for periods of up to one week in duration; however, this medication generally has been replaced by other sedative-hypnotic agents.

temazepam: approved small molecule (35 associated side effects) For the short-term treatment of insomnia (generally 7-10 days).

clobazam: illicit,approved small molecule (58 associated side effects) For treatment and management of epilepsy and anxiety disorder.

alprazolam: illicit,approved small molecule (178 associated side effects) For the management of anxiety disorder or the short-term relief of symptoms of anxiety and for the treatment of panic disorder, with or without agoraphobia.

chlordiazepoxide:illicit,approved small molecule (20 associated side effects) For the management of anxiety disorders or for the short-term relief of symptoms of anxiety, withdrawal symptoms of acute alcoholism, and preoperative apprehension and anxiety.

adinazolam: approved small molecule (0 associated side effects) For the treatment of anxiety and status epilepticus.

piperazine: approved small molecule (0 associated side effects)

Used as alternative treatment for ascariasis caused by <i>Ascaris lumbricoides</i> (roundworm) and enterobiasis (oxyuriasis) caused by <i>Enterobius vermicularis</i> (pinworm). It is also used to treat partial intestinal obstruction by the common roundworm, a condition primarily occurring in children.

ivermectin: approved small molecule (47 associated side effects)

For the treatment of intestinal (i.e., nondisseminated) strongyloidiasis due to the nematode parasite <i>Strongyloides stercoralis</i>. Also for the treatment of onchocerciasis (river blindness) due to the nematode parasite <i>Onchocerca volvulus</i>. Can be used to treat scabies caused by <i>Sarcoptes scabiei</i>.

clorazepate: illicit,approved small molecule (0 associated side effects) For the management of anxiety disorders or for the short-term relief of the symptoms of anxiety. Also used as adjunctive therapy in the management of partial seizures and for the symptomatic relief of acute alcohol withdrawal.

midazolam: illicit,approved small molecule (119 associated side effects) For use as a sedative perioperatively.

flurazepam: illicit,approved small molecule (62 associated side effects) For short-term and intermittent use in patients with recurring insomnia and poor sleeping habits

halazepam: illicit,approved small molecule (0 associated side effects) Used to relieve anxiety, nervousness, and tension associated with anxiety disorders.

propofol: approved small molecule (163 associated side effects) Used for induction and/or maintenance of anaesthesia and for management of refractory status epilepticus.

diazepam: illicit,approved small molecule (149 associated side effects) Used in the treatment of severe anxiety disorders, as a hypnotic in the short-term management of insomnia, as a sedative and premedicant, as an anticonvulsant, and in the management of alcohol withdrawal syndrome.

oxazepam: approved small molecule (36 associated side effects) For the treatment of anxiety disorders and alcohol withdrawal.

triazolam: illicit,approved,withdrawn small molecule (66 associated side effects) For the short-term treatment of insomnia.

clonazepam: illicit,approved small molecule (228 associated side effects) Used as an anticonvulsant in the treatment of the Lennox-Gastaut syndrome (petit mal variant), akinetic and myoclonic seizures.

estazolam: illicit,approved small molecule (131 associated side effects) For the short-term management of insomnia characterized by difficulty in falling asleep, frequent nocturnal awakenings, and/or early morning awakenings.

bromazepam: illicit,approved small molecule (47 associated side effects) For the short-term treatment of insomnia, short-term treatment of anxiety or panic attacks, if a benzodiazepine is required, and the alleviation of the symptoms of alcohol- and opiate-withdrawal.

clotiazepam: illicit,approved small molecule (0 associated side effects) For the treatment of anxiety disorders.

fludiazepam: illicit,approved small molecule (0 associated side effects) Used for the short-term treatment of anxiety disorders.

prazepam: illicit,approved small molecule (0 associated side effects) For the treatment of anxiety disorders.

quazepam: illicit,approved small molecule (0 associated side effects) Used to treat insomnia.

cinolazepam: approved small molecule (0 associated side effects) For the management of anxiety disorders or for the short-term relief of the symptoms of anxiety or anxiety associated with depressive symptoms.

nitrazepam: approved small molecule (44 associated side effects) Used to treat short-term sleeping problems (insomnia), such as

difficulty falling asleep, frequent awakenings during the night, and early-morning awakening.

fospropofol: approved small molecule (0 associated side effects) Used for induction and/or maintenance of anaesthesia and for management of refractory status epilepticus.

539 known side effects mediated through drugs targeting this protein:

Abdominal discomfort Abdominal distension Abdominal pain  
Abnormal dreams Abnormal faeces Abnormal sensation in eye  
Acidosis Acne Acute coronary syndrome Affect lability  
Ageusia Aggression Agitation Agranulocytosis Akathisia  
Akinesia Alcohol poisoning Alopecia Altered state of  
consciousness Amblyopia Amnesia Anaemia Anaphylactic  
shock Anaphylactoid reaction Anger Angioedema Angiopathy Anorectal  
discomfort Anorectal disorder Anterograde amnesia Anxiety  
Aortic dissection Apathy Aphonia Apnoea Appetite  
disorder Arrhythmia Arrhythmia supraventricular Arterial spasm  
Arthralgia Arthritis Aspartate aminotransferase increased  
Aspiration Asthenia Asthma Ataxia Athetosis  
Atrial fibrillation Atrioventricular block Back pain  
Balance disorder Bladder dysfunction Bladder pain  
Blindness Blood alkaline phosphatase increased Blood  
bilirubin increased Blood creatinine increased Blood disorder  
Blood glucose decreased Blood thromboplastin decreased  
Blood urea increased Body temperature decreased Body  
temperature increased Borderline personality disorder Bradycardia  
Bradyphrenia Brain oedema Breast disorder Breast pain  
Breast swelling Bronchitis Bronchospasm Bundle branch  
block Candidiasis Carbon dioxide increased Cardiac arrest  
Cardiac disorder Cardiac failure Cardiac fibrillation  
Cardiac output decreased Cardio-respiratory arrest  
Cardiovascular disorder Cellulitis Cerebellar syndrome  
Chest discomfort Chest pain Chills Choking sensation  
Chorea Chorioretinitis Choroiditis Chromaturia Clonic  
convulsion Clonus Clumsiness Coagulopathy Cognitive  
disorder Coma Completed suicide Confusional state Conjunctival  
hyperaemia Conjunctivitis Connective tissue disorder  
Constipation Conversion disorder Convulsion  
Coordination abnormal Cough Cyanosis Cystitis Cystitis  
noninfective Cytolytic hepatitis Deafness Death Decreased  
appetite Dehydration Delirium Delirium tremens Delusion  
Dependence Depersonalisation Depressed level of consciousness  
Depressed mood Depression Depressive symptom  
Derealisation Dermatitis Dermatitis contact Dermatitis  
exfoliative Diarrhoea Diplopia Discomfort Disinhibition  
Disorientation Disturbance in attention Disturbance in  
sexual arousal Dizziness Drooling Drug abuse Drug dependence  
Drug effect increased Drug eruption Drug intolerance Drug  
withdrawal convulsions Dry mouth Dry skin Dysaesthesia  
Dysarthria Dysgeusia Dyskinesia Dysmenorrhoea Dyspepsia  
Dysphagia Dysphonia Dysphoria Dyspnoea Dysthymic  
disorder Dystonia Dysuria Ear infection Ear pain  
Ecchymosis Effusion Ejaculation delayed Ejaculation  
failure Electrocardiogram ST segment Electrocardiogram ST segment

depression    Electrocardiogram abnormal    Emotional disorder  
Emotional distress    Emotional poverty    Encephalopathy  
Encopresis    Endometrial sarcoma    Energy increased  
Enterocolitis    Enuresis    Eosinophilia    Epilepsy  
Epistaxis    Erectile dysfunction    Erythema    Erythema  
multiforme    Euphoric mood    Extrapyrarnidal disorder  
Extrasytostoles    Eye disorder    Eye irritation    Eye  
movement disorder    Eye pain    Eye swelling    Eyelid oedema    Face  
oedema    Faecal incontinence    Fatigue    Feeling abnormal  
Feeling cold    Feeling drunk    Feeling hot    Feeling jittery  
Feeling of body temperature change    Flat affect    Flatulence  
Floppy infant    Flushing    Fungal infection    Gait disturbance  
Galactorrhoea    Gangrene    Gastric disorder    Gastritis  
Gastrointestinal disorder    Gastrointestinal haemorrhage  
Gastrointestinal pain    Gingival pain    Glossitis    Glossodynia  
Gout    Grand mal convulsion    Gynaecomastia    Haematoma  
Haematuria    Haemoglobin    Haemoglobin decreased    Haemorrhage  
Haemorrhage urinary tract    Haemorrhoids    Hallucination  
Hangover    Headache    Hearing impaired    Heart rate irregular  
Hemiparesis    Hepatic enzyme increased    Hepatic failure  
Hepatic function abnormal    Hepatitis    Hepatocellular injury  
Hepatomegaly    Herpes simplex    Herpes virus infection  
Hiccups    Hirsutism    Homicidal ideation    Hordeolum  
Hostility    Hunger    Hyperaemia    Hypercapnia    Hyperglycaemia  
Hyperhidrosis    Hyperkalaemia    Hyperkinesia  
Hyperlipidaemia    Hyperprolactinaemia    Hypersensitivity  
Hypersomnia    Hypertension    Hypertonia    Hypertrophy  
Hyperventilation    Hypoaesthesia    Hypochromic anaemia  
Hypokalaemia    Hypokinesia    Hypomagnesaemia    Hypomania  
Hyponatraemia    Hypopnoea    Hyporeflexia    Hypotension  
Hypothermia    Hypotonia    Hypoventilation    Hypoxia    Ileus Ill-  
defined disorder    Illusion    Inappropriate antidiuretic hormone  
secretion    Incontinence    Increased appetite    Induration  
Infarction    Infection    Infectious mononucleosis    Infestation  
Inflammation    Influenza    Injection site pain    Injection  
site reaction    Insomnia    Intracranial pressure increased  
Intraocular pressure increased    Iridocyclitis  
Irritability    Ischaemia    Jaundice    Joint swelling  
Keratitis    Laryngitis    Laryngospasm    Lethargy  
Leukocytosis    Leukopenia    Libido decreased    Libido increased  
Liver function test abnormal    Liver injury    Local reaction  
Logorrhoea    Loss of consciousness    Loss of libido    Lung  
disorder    Lymphadenopathy    Major depression    Malaise    Mania    Mean  
arterial pressure    Mediastinal disorder    Melaena    Memory impairment  
Menstrual disorder    Menstruation irregular    Mental disability  
Mental disorder    Mental retardation    Metabolic acidosis  
Micturition disorder    Micturition urgency    Migraine  
Miosis    Moaning    Mood swings    Motion sickness    Movement  
disorder    Muscle relaxant therapy    Muscle rigidity    Muscle  
spasms    Muscle spasticity    Muscle twitching    Muscular weakness  
Musculoskeletal discomfort    Musculoskeletal disorder  
Musculoskeletal stiffness    Myalgia    Mydriasis    Myocardial  
infarction    Myocardial ischaemia    Myoclonus    Nasal congestion  
Nasopharyngitis    Nausea    Neck pain    Necrosis    Neonatal  
disorder    Nervous system disorder    Nervousness    Neuritis

Neuroleptic malignant syndrome      Neuropathy peripheral  
 Neutropenia Nightmare    Nocturia      Nodal arrhythmia Nodal  
 rhythm      Nodule      Nuchal rigidity    Nystagmus    Obstruction  
 Obstructive airways disorder Oedema      Oedema peripheral  
 Oliguria      Opisthotonus      Oropharyngeal pain      Orthostatic  
 hypotension Osteoarthritis      Otitis media      Pain Pain in extremity  
 Pain in jaw Pallor      Palpitations      Pancreatitis  
 Pancytopenia      Paraesthesia      Paraesthesia oral Paralysis  
 Paresis      Pelvic pain Penile discharge Pericardial effusion  
 Periorbital oedema      Personality disorder      Phaeochromocytoma  
 Pharyngitis Phlebitis      Photophobia Photosensitivity reaction  
 Pigmentation disorder      Platelet count decreased      Pleurisy  
 Pneumonia      Pneumothorax      Pollakiuria Polyuria      Post-  
 traumatic stress disorder      Precocious puberty      Premenstrual  
 syndrome      Presyncope Proctalgia Prothrombin level increased  
 Pruritus      Psychomotor retardation      Psychotic disorder  
 Puberty      Pulmonary congestion      Pulmonary function test  
 decreased      Pulmonary haemorrhage      Pulmonary hypertension Pulmonary  
 oedema      Purpura      Rash Rash maculo-papular      Rectal  
 haemorrhage Rectal tenesmus      Renal failure      Respiratory acidosis  
     Respiratory arrest      Respiratory depression Respiratory  
 disorder      Respiratory failure      Respiratory moniliasis Respiratory  
 rate decreased      Respiratory tract congestion Respiratory tract  
 infection      Retching      Retrograde amnesia      Rhabdomyolysis  
     Rhinitis allergic Rhinorrhoea Rhonchi      Right ventricular  
 failure      Salivary hypersecretion      Scotoma      Sedation  
     Sepsis      Sexual dysfunction      Shock Sinus tachycardia  
     Sinusitis      Skin burning sensation Skin discolouration      Skin  
 disorder      Skin exfoliation Skin necrosis      Sleep apnoea syndrome  
     Sleep disorder      Sleep talking      Sluggishness      Sneezing  
     Somnambulism      Somnolence Speech disorder      Stevens-Johnson  
 syndrome      Stomatitis Strabismus Stridor      Stupor      Substance  
 abuse Suicidal ideation Supraventricular extrasystoles  
     Supraventricular tachycardia Swelling      Swelling face  
     Swollen tongue      Syncope      Synovitis      Tachycardia Tachypnoea  
     Tenderness Tendonitis Tension      Therapeutic response  
 decreased      Thinking abnormal Thirst      Thrombocytopenia  
     Thrombocytosis      Thrombophlebitis Thrombosis      Thyroid neoplasm  
     Tinnitus      Tongue coated      Tongue disorder      Tongue oedema  
     Tooth disorder      Toothache      Toxic epidermal necrolysis  
     Transaminases increased      Tremor      Tropical spastic  
 paresis      Ulcer Upper airway obstruction      Upper respiratory  
 tract infection      Urethral disorder Urinary hesitation      Urinary  
 incontinence      Urinary retention Urinary tract disorder Urinary  
 tract infection      Urine abnormality Urine colour abnormal      Urine  
 output increased      Urticaria      Uveitis      Vaginal discharge Vaginal  
 infection      Vaginal inflammation      Vascular purpura Vasodilation  
 procedure      Venous thrombosis Ventricular arrhythmia Ventricular  
 extrasystoles      Ventricular fibrillation      Ventricular  
 tachycardia Vertigo      Viral infection      Vision blurred      Visual  
 acuity reduced      Visual impairment Vomiting      Weight decreased  
     Weight increased Wheezing      White blood cell count decreased  
     Withdrawal syndrome      Xeroderma      Xerophthalmia      Yawning

\*\*\*\*\*  
 \*\*\*\*\*

Potassium transporter - Group: Transporter

Treated with:

clofazimine: approved small molecule (54 associated side effects) For the treatment of lepromatous leprosy, including dapsone-resistant lepromatous leprosy and lepromatous leprosy complicated by erythema nodosum leprosum.

54 known side effects mediated through drugs targeting this protein:

Abdominal pain upper Anaemia Angiopathy Asthenia Bladder  
pain Blindness Body temperature increased Bone pain Cheilosis  
Completed suicideConstipation Cystitis Cystitis  
noninfective Decreased appetite Dermatitis Dermatitis  
acneiform Dermatitis exfoliative Diarrhoea Dizziness Embolism  
Embolism venous Enteritis Eosinophilia Fatigue  
Gastrointestinal haemorrhage Haemoglobin Haemorrhage Headache  
Hepatitis Hepatomegaly Hyperglycaemia Hyperhidrosis  
Hypokalaemia Ichthyosis acquired Infarction Intestinal  
obstructionJaundice Lymphadenopathy Nausea Neuralgia  
ObstructionOedema Pain Photosensitivity reaction  
Pigmentation disorder Pruritus Rash Skin discolouration  
Somnolence Splenic infarction Visual acuity reduced  
Visual impairmentVomiting Weight decreased

\*\*\*\*\*  
\*\*\*\*\*

Outer-membrane lipoprotein lolB - Group: Receptor

Treated with:

1-methoxy-2-[2-(2-methoxy-ethoxy)-ethane: experimental small  
molecule (0 associated side effects)

known side effects mediated through drugs targeting this protein:

\*\*\*\*\*  
\*\*\*\*\*

Steroid hormone receptor ERR1 - Group: Receptor

Treated with:

troglitazone: withdrawn small molecule (32 associated side effects) For the treatment of Type II diabetes mellitus. It is used alone or in combination with a sulfonylurea, metformin, or insulin as an adjunct to diet and exercise.

1-cyclohexyl-n-([1-(4-methylphenyl)-1h-indol-3-yl]methyl)methanamine: experimental small molecule (0 associated side effects)

31 known side effects mediated through drugs targeting this protein:

Abdominal pain Alanine aminotransferase increasedAnaemia  
Asthenia Blood creatine phosphokinase increased Body  
temperature increased Cardiac failure Cardiac failure congestive  
Decreased appetite Discomfort Dizziness Fatigue  
Feeling abnormal Gastrointestinal pain Hepatic function  
abnormal Hepatitis Hyperglycaemia Ill-defined disorder  
Jaundice Laboratory test abnormal Liver function test  
abnormal Loss of consciousness Malaise Nausea Oedema  
Pain Shock Syncope Volume blood increased Vomiting  
Weight increased

\*\*\*\*\*  
\*\*\*\*\*

High affinity immunoglobulin gamma Fc receptor I - Group: Receptor  
Treated with:

cetuximab: approved biotech (0 associated side effects) For treatment of EGFR-expressing metastatic colorectal cancer in patients who are refractory to other irinotecan-based chemotherapy regimens. Cetuximab is also indicated for treatment of squamous cell carcinoma of the head and neck in conjunction with radiation therapy.

etanercept: approved biotech (0 associated side effects) For treatment of severe active rheumatoid arthritis in adults, severe juvenile idiopathic arthritis, ankylosing spondylitis, and severe plaque psoriasis.

intravenous immunoglobulin: approved biotech (0 associated side effects) IVIg is used in the treatment of immunodeficiencies, as well as autoimmune and inflammatory disorders. These indications includes idiopathic thrombocytopenic purpura, Kawasaki disease, hypogammaglobulinemia, B cell chronic lymphocytic leukemia, bone marrow transplant complications, Guillain-Barré syndrome, chronic inflammatory demyelinating polyneuropathy (CIDP), multiple sclerosis, rheumatoid arthritis, myasthenia gravis, Wiskott-Aldrich syndrome and inflammatory skin diseases.

adalimumab: approved biotech (0 associated side effects) For treatment of rheumatoid arthritis, psoriatic arthritis, ankylosing spondylitis, and Crohn's disease.

abciximab: approved biotech (0 associated side effects)

gemtuzumab ozogamicin: approved biotech (0 associated side effects) For treatment of CD33-positive acute myeloid leukemia in patients 60 and over who are not candidates for other chemotherapy.

trastuzumab: approved biotech (0 associated side effects)

For treatment of early stage HER2-positive breast cancer, or metastatic breast cancer that substantially overexpress HER2.

rituximab: approved biotech (0 associated side effects) For treatment of CD20-positive non-Hodgkins lymphoma, chronic lymphocytic leukemia, and rheumatoid arthritis.

basiliximab: approved biotech (0 associated side effects)

For prophylactic treatment of kidney transplant rejection

muromonab: approved biotech (0 associated side effects) For treatment of organ transplant recipients, prevention of organ rejection

ibrutumomab: approved biotech (0 associated side effects)

For treatment of non-Hodgkin's lymphoma

tositumomab: approved biotech (0 associated side effects)

For treatment of non-Hodgkin's lymphoma (CD20 positive, follicular)

alemtuzumab: approved biotech (0 associated side effects)

Alemtuzumab (Campath) is a monoclonal antibody therapy used for treatment of B-cell chronic lymphocytic leukemia.

alefacept: approved biotech (0 associated side effects) As an immunosuppressive drug, Alefacept can be used for treatment of moderate to severe chronic plaque psoriasis

efalizumab: approved biotech (0 associated side effects) For the treatment of adult patients with moderate to severe chronic



plaque psoriasis, who are candidates for phototherapy or systemic therapy.

natalizumab: approved biotech (0 associated side effects)  
For treatment of multiple sclerosis.

palivizumab: approved biotech (0 associated side effects)  
For prophylaxis of respiratory diseases caused by respiratory syncytial virus.

daclizumab: approved biotech (0 associated side effects)  
Zenapax is a humanized monoclonal antibody used for prevention of renal transplant rejection

bevacizumab: approved biotech (0 associated side effects)  
As part of combination therapy for metastatic colorectal cancer and HER2-negative metastatic breast cancer.

porfimer: approved small molecule (0 associated side effects)  
Indicated in the treatment of esophageal cancer.

methyl aminolevulinate: approved small molecule (45 associated side effects)  
For topical use, in combination with 570 to 670 nm wavelength red light illumination, in the treatment of non-hyperkeratotic actinic keratoses of the face and scalp in immunocompetent patients when used in conjunction with lesion preparation (debridement using a sharp dermal curette).

45 known side effects mediated through drugs targeting this protein:

Agitation Basal cell carcinoma Blister Burning sensation  
Dermatitis bullous Dermatitis contact Discomfort  
Dissociation Eczema Erythema Eye disorder  
Eyelid oedema Face oedema Haemoglobin Haemorrhage Headache  
Hyperkinesia Hypersensitivity Infection Keratitis  
Macular oedema Neoplasm malignant Oedema Pain of  
skin Papule Photosensitivity reaction Pigmentation disorder  
Pruritus Rash pustular Scab Sensitisation Skin  
burning sensation Skin cancer Skin exfoliation Skin haemorrhage Skin  
hyperpigmentation Skin infection Skin tightness Skin ulcer Skin  
warm Squamous cell carcinoma Swelling Ulcer Urticaria  
Vitreous detachment

\*\*\*\*\*  
\*\*\*\*\*

Calcium-activated potassium channel subunit beta-4 - Group: Channel  
Treated with:

miconazole: approved small molecule (33 associated side effects)  
For topical application in the treatment of tinea pedis (athlete's foot), tinea cruris, and tinea corporis caused by *Trichophyton rubrum*, *Trichophyton mentagrophytes*, and *Epidermophyton floccosum*, in the treatment of cutaneous candidiasis (moniliasis), and in the treatment of tinea versicolor.

33 known side effects mediated through drugs targeting this protein:

Abdominal pain Anaphylactic shock Anaphylactoid reaction  
Angioedema Breast disorder Burning sensation Cardiac disorder  
Dermatitis Dermatitis contact Erythema Gastrointestinal  
pain Genital burning sensation Genital discharge Headache  
Immune system disorder Muscle spasms Nausea Nervous  
system disorder Oedema Pain Pelvic pain Pruritus genital Rash  
Respiratory disorder Respiratory tract infection Upper

respiratory tract infection Urethral disorderUrinary tract disorder  
Urinary tract infection Urticaria Vaginal discharge  
Vulvovaginal discomfort Vulvovaginal erythema

\*\*\*\*\*  
\*\*\*\*\*

Nociceptin receptor - Group: Receptor

Treated with:

etorphine: illicit,experimental small molecule (0 associated  
side effects)

known side effects mediated through drugs targeting this protein:

\*\*\*\*\*  
\*\*\*\*\*

Ileal sodium/bile acid cotransporter - Group: Transporter

Treated with:

cyclosporine: approved biotech (0 associated side effects)

For treatment of transplant rejection, rheumatoid arthritis,  
severe psoriasis

ursodeoxycholic acid: approved small molecule (210 associated  
side effects) The drug reduces cholesterol absorption and is used  
to dissolve (cholesterol) gallstones in patients who want an  
alternative to surgery.

glycochenodeoxycholic acid: experimental small molecule (0  
associated side effects)

taurocholic acid:experimental small molecule (0 associated  
side effects)

210 known side effects mediated through drugs targeting this  
protein:

Abdominal discomfort Abdominal pain Acne Acute coronary  
syndrome Alopecia Amblyopia Amnesia Amyloidosis Anaemia  
Angina pectoris Angioedema Angiopathy Aortic dissection  
Arrhythmia Arthralgia Arthritis Asthenia Asthma  
Atrial fibrillation Atrioventricular block Atrioventricular  
block complete Back pain Biliary colic Bladder pain  
Blindness Blood creatinine increased Blood glucose  
increased Body temperature increased Bone disorder Bone pain  
Breast disorder Breast mass Breast neoplasm Bronchitis  
Cardiac disorder Cardiac failure Cardiac failure congestive  
Cardiac fibrillation Cardiomegaly Cardiomyopathy  
Cardiovascular disorder Cataract Cellulitis  
Cerebrovascular accident Chest pain Chills  
Cholecystitis Confusional stateConjunctivitis Connective  
tissue disorder Constipation Convulsion Cough Cyst Cystitis  
Cystitis noninfective Deafness Decreased appetite  
Dehydration Dermatitis Diabetes mellitusDiarrhoea Diplopia  
Discomfort Dizziness Drug hypersensitivity Drug interaction  
Dry mouth Duodenal ulcer Dysmenorrhoea Dyspepsia  
Dysphagia Dyspnoea Dysuria Ear disorder Ear  
infection Ecchymosis Effusion Epistaxis Eructation Eye  
disorder Face oedema Fatigue Feeling abnormal Fibrocystic  
breast disease Fibrosis Flatulence Fluid retention Gastric  
disorder Gastric ulcer Gastritis Gastrointestinal disorder  
Gastrointestinal haemorrhage Gastrointestinal pain Generalised

oedema Granuloma Haematuria Haemoglobin Haemolytic anaemia  
 Haemorrhage Headache Heat rash Hepatic enzyme increased  
 Hepatic function abnormal Hepatobiliary disease Herpes  
 simplex Herpes virus infection Hyperhidrosis Hypersensitivity  
 Hypertension Hypertrophy Hypotension Ill-defined disorder  
 Immune system disorder Incontinence Infarction Infection  
 Infestation Influenza Insomnia Interstitial lung disease  
 Laboratory test abnormal Laryngeal oedema Leukopenia Loss  
 of consciousness Lung disorder Lung infiltration Lung neoplasm  
 Lymphadenopathy Malaise Mediastinal disorder Melaena  
 Menorrhagia Migraine Muscle spasms Musculoskeletal  
 discomfort Musculoskeletal pain Myalgia Myocardial infarction  
 Nasal discomfort Nausea Neck pain Neoplasm Nervous  
 system disorder Nervousness Nocturia Nodule Oedema  
 Oedema peripheral Oesophagitis Orthostatic hypotension  
 Otitis media Pain Palpitations Pancreatitis  
 Paraesthesia Pathological fracture Peptic ulcer  
 Pericardial effusion Pericarditis Pharyngitis  
 Photosensitivity reaction Pleural disorder Pleural effusion  
 Pneumonia Pollakiuria Polyp Pruritus Psoriasis Pulmonary  
 fibrosis Pulmonary hypertension Rash Renal failure Renal  
 impairment Respiratory disorder Respiratory tract infection  
 Retinal disorder Rhinitis Salivary gland enlargement Shock  
 Sinusitis Skin discolouration Skin disorder Skin  
 hypertrophy Skin papilloma Skin ulcer Somnolence Syncope  
 Tachycardia Tenderness Tension Thrombocytopenia Tinnitus  
 Ulcer Ulcer haemorrhage Upper respiratory tract infection  
 Urethral disorder Urinary incontinence Urinary tract disorder  
 Urinary tract infection Urticaria Vaginal infection  
 Vaginal inflammation Vasodilation procedure Vertigo Viral  
 infection Visual acuity reduced Visual impairment Vomiting  
 Weight increased

\*\*\*\*\*  
 \*\*\*\*\*

Acetylcholine receptor subunit gamma - Group: Channel

Treated with:

galantamine: approved small molecule (160 associated side effects) For the treatment of mild to moderate dementia of the Alzheimer's type. Has also been investigated in patients with mild cognitive impairment who did not meet the diagnostic criteria for Alzheimer's disease.

160 known side effects mediated through drugs targeting this protein:

Abdominal discomfort Abdominal pain Aggression Agitation  
 Anaemia Anxiety Apathy Aphasia Apraxia  
 Arrhythmia Arrhythmia supraventricular Arthralgia Arthritis  
 Asthenia Ataxia Atrial fibrillation Atrioventricular  
 block Back pain Bladder pain Blood alkaline phosphatase  
 increased Blood urea increased Body temperature increased Bone  
 pain Bradycardia Bronchitis Bundle branch block Cardiac failure  
 Cardiac fibrillation Cardiovascular disorder Cataract  
 Cerebrovascular accident Cerebrovascular disorder Chest  
 pain Coagulopathy Completed suicide Confusional state  
 Constipation Convulsion Cough Cystitis Cystitis

noninfective      Decreased appetite      Dehydration Delirium  
                  Depression      Dermatitis      Diarrhoea      Discomfort      Disturbance in  
 sexual arousal      Diverticulitis      Dizziness      Dry mouth      Dysgeusia  
                  Dyspepsia      Dysphagia      Electrocardiogram QT prolonged  
                  Electrocardiogram T wave inversion Epistaxis      Eye disorder  
                  Fatigue      Feeling abnormal      Flat affect      Flatulence      Gastric  
 disorder      Gastritis      Gastroenteritis      Gastrointestinal haemorrhage  
                  Gastrointestinal pain      Gravitational oedema      Haematuria  
                  Haemoglobin Haemorrhage      Hallucination      Headache      Hepatic  
 enzyme increased      Hepatitis      Hepatobiliary disease      Hiccups  
                  Hyperglycaemia      Hyperkinesia      Hypersensitivity      Hypersomnia  
                  Hypertension      Hypertonia      Hypokalaemia      Hypokinesia  
                  Hypotension Ill-defined disorder      Immune system disorder  
                  Incontinence      Infarction      Infection      Insomnia      Ischaemia  
                  Lethargy      Libido increased      Liver disorder      Loss of  
 consciousness      Lower gastrointestinal haemorrhage Malaise  
                  Melaena      Mental disorder      Muscle contractions involuntary  
                  Muscle spasms      Musculoskeletal discomfort      Musculoskeletal  
 disorder      Myalgia      Myocardial ischaemia      Nausea  
                  Nephrolithiasis      Nervous system disorder      Nervousness  
                  Neuropathy peripheral      Nightmare      Nocturia      Oedema  
                  Oedema peripheral Oesophageal disorder      Oesophageal  
 perforation Orthostatic hypotension      Pain in extremity  
                  Palpitations      Paraesthesia      Paranoia      Pneumonia  
                  Pollakiuria Purpura      Rash      Rectal haemorrhage      Renal  
 failure      Respiratory disorder      Respiratory tract infection  
                  Rhinitis      Salivary hypersecretion      Shock      Somnolence  
                  Suicidal ideation Suicide attempt      Supraventricular tachycardia  
                  Syncope      Tachycardia Tension      Thrombocytopenia  
                  Thrombocytosis      Tinnitus      Transient ischaemic attack  
                  Tremor      Upper respiratory tract infection      Urethral disorder  
                  Urinary incontinence      Urinary retention Urinary tract disorder  
                  Urinary tract infection      Vascular dementia Vascular purpura  
                  Ventricular tachycardia      Vertigo      Vision blurred  
                  Vomiting      Weight decreased

\*\*\*\*\*  
 \*\*\*\*\*

Gamma-aminobutyric acid receptor subunit rho-2 - Group: Channel

Treated with:

lorazepam: approved      small molecule      (126 associated side effects)      For the management of anxiety disorders, and for treatment of status epilepticus.

temazepam: approved      small molecule      (35 associated side effects)      For the short-term treatment of insomnia (generally 7-10 days).

clobazam: illicit, approved small molecule      (58 associated side effects)      For treatment and management of epilepsy and anxiety disorder.

alprazolam: illicit, approved small molecule      (178 associated side effects)      For the management of anxiety disorder or the short-term relief of symptoms of anxiety and for the treatment of panic disorder, with or without agoraphobia.

chlordiazepoxide: illicit, approved small molecule      (20 associated side effects)      For the management of anxiety disorders or for the

short-term relief of symptoms of anxiety, withdrawal symptoms of acute alcoholism, and preoperative apprehension and anxiety.

adinazolam: approved small molecule (0 associated side effects)  
For the treatment of anxiety and status epilepticus.

clorazepate: illicit, approved small molecule (0 associated side effects)  
For the management of anxiety disorders or for the short-term relief of the symptoms of anxiety. Also used as adjunctive therapy in the management of partial seizures and for the symptomatic relief of acute alcohol withdrawal.

midazolam: illicit, approved small molecule (119 associated side effects)  
For use as a sedative perioperatively.

flurazepam: illicit, approved small molecule (62 associated side effects)  
For short-term and intermittent use in patients with recurring insomnia and poor sleeping habits

halazepam: illicit, approved small molecule (0 associated side effects)  
Used to relieve anxiety, nervousness, and tension associated with anxiety disorders.

diazepam: illicit, approved small molecule (149 associated side effects)  
Used in the treatment of severe anxiety disorders, as a hypnotic in the short-term management of insomnia, as a sedative and premedicant, as an anticonvulsant, and in the management of alcohol withdrawal syndrome.

oxazepam: approved small molecule (36 associated side effects)  
For the treatment of anxiety disorders and alcohol withdrawal.

triazolam: illicit, approved, withdrawn small molecule (66 associated side effects)  
For the short-term treatment of insomnia.

clonazepam: illicit, approved small molecule (228 associated side effects)  
Used as an anticonvulsant in the treatment of the Lennox-Gastaut syndrome (petit mal variant), akinetic and myoclonic seizures.

estazolam: illicit, approved small molecule (131 associated side effects)  
For the short-term management of insomnia characterized by difficulty in falling asleep, frequent nocturnal awakenings, and/or early morning awakenings.

bromazepam: illicit, approved small molecule (47 associated side effects)  
For the short-term treatment of insomnia, short-term treatment of anxiety or panic attacks, if a benzodiazepine is required, and the alleviation of the symptoms of alcohol- and opiate-withdrawal.

clotiazepam: illicit, approved small molecule (0 associated side effects)  
For the treatment of anxiety disorders.

fludiazepam: illicit, approved small molecule (0 associated side effects)  
Used for the short-term treatment of anxiety disorders.

prazepam: illicit, approved small molecule (0 associated side effects)  
For the treatment of anxiety disorders.

quazepam: illicit, approved small molecule (0 associated side effects)  
Used to treat insomnia.

cinolazepam: approved small molecule (0 associated side effects)  
For the management of anxiety disorders or for the short-term relief of the symptoms of anxiety or anxiety associated with depressive symptoms.

nitrazepam: approved small molecule (44 associated side effects)  
Used to treat short-term sleeping problems (insomnia), such as

difficulty falling asleep, frequent awakenings during the night, and early-morning awakening.

486 known side effects mediated through drugs targeting this protein:

Abdominal discomfort Abdominal distension Abdominal pain  
Abnormal dreams Abnormal faeces Acidosis Acne Affect  
labiality Ageusia Aggression Agitation Agranulocytosis  
Akathisia Akinesia Alcohol poisoning Alopecia Altered  
state of consciousness Amblyopia Amnesia Anaemia  
Anaphylactic shock Anaphylactoid reaction Anger Angioedema  
Angiopathy Anorectal discomfort Anorectal disorder  
Anterograde amnesia Anxiety Aortic dissection Apathy  
Aphonia Apnoea Appetite disorder Arrhythmia Arterial  
spasm Arthralgia Arthritis Aspartate aminotransferase increased  
Aspiration Asthenia Asthma Ataxia Athetosis  
Atrioventricular block Back pain Balance disorder Bladder  
dysfunction Bladder pain Blindness Blood alkaline phosphatase  
increased Blood bilirubin increased Blood disorder Blood  
glucose decreased Blood thromboplastin decreased Body temperature  
decreased Body temperature increased Borderline personality  
disorder Bradycardia Bradyphrenia Brain oedema Breast  
disorder Breast pain Breast swelling Bronchitis Bronchospasm  
Candidiasis Carbon dioxide increased Cardiac arrest  
Cardiac disorder Cardiac failure Cardio-respiratory arrest  
Cardiovascular disorder Cellulitis Cerebellar syndrome  
Chest discomfort Chest pain Chills Choking sensation  
Chorea Chromaturia Clonic convulsion Clonus Clumsiness  
Coagulopathy Cognitive disorder Coma Completed suicide  
Confusional state Connective tissue disorder Constipation  
Conversion disorder Convulsion Coordination abnormal Cough  
Cyanosis Cystitis Cystitis noninfective Cytolytic  
hepatitis Deafness Death Decreased appetite Dehydration  
Delirium Delirium tremens Delusion Dependence  
Depersonalisation Depressed level of consciousness Depressed  
mood Depression Depressive symptom Derealisation Dermatitis  
Dermatitis contact Dermatitis exfoliative Diarrhoea  
Diplopia Discomfort Disinhibition Disorientation  
Disturbance in attention Disturbance in sexual arousal  
Dizziness Drooling Drug abuse Drug dependence Drug  
eruption Drug intolerance Drug withdrawal convulsions Dry mouth  
Dry skin Dysaesthesia Dysarthria Dysgeusia Dyskinesia  
Dysmenorrhoea Dyspepsia Dysphagia Dysphonia Dysphoria  
Dyspnoea Dysthymic disorder Dystonia Dysuria Ear  
infection Ear pain Ecchymosis Effusion Ejaculation delayed  
Ejaculation failure Emotional disorder Emotional  
distress Emotional poverty Encephalopathy Encopresis Endometrial  
sarcoma Energy increased Enterocolitis Enuresis  
Eosinophilia Epilepsy Epistaxis Erectile dysfunction  
Erythema Erythema multiforme Euphoric mood  
Extrapyramidal disorder Extrasystoles Eye disorder  
Eye irritation Eye movement disorder Eye pain Eye  
swelling Face oedema Faecal incontinence Fatigue Feeling  
abnormal Feeling cold Feeling drunk Feeling hot Feeling  
jittery Feeling of body temperature change Flat affect Flatulence

Floppy infant      Flushing      Fungal infection      Gait disturbance  
 Galactorrhoea      Gangrene      Gastric disorder      Gastritis  
 Gastrointestinal disorder      Gastrointestinal haemorrhage  
 Gastrointestinal pain      Gingival pain      Glossitis      Glossodynia  
 Gout      Grand mal convulsion      Gynaecomastia      Haematoma  
 Haematuria      Haemoglobin      Haemoglobin decreased      Haemorrhage  
 Haemorrhage urinary tract      Haemorrhoids      Hallucination  
 Hangover      Headache      Hearing impaired      Heart rate irregular  
 Hemiparesis      Hepatic enzyme increased      Hepatic failure  
 Hepatic function abnormal      Hepatitis      Hepatocellular injury  
 Hepatomegaly      Herpes simplex      Herpes virus infection  
 Hiccups      Hirsutism      Homicidal ideation      Hordeolum  
 Hostility      Hunger      Hypercapnia      Hyperhidrosis  
 Hyperkinesia      Hyperprolactinaemia      Hypersensitivity  
 Hypersomnia      Hypertension      Hypertonia      Hyperventilation  
 Hypoaesthesia      Hypochromic anaemia      Hypokinesia      Hypomania  
 Hyponatraemia      Hypopnoea      Hyporeflexia      Hypotension  
 Hypothermia      Hypotonia      Hypoventilation      Hypoxia      Ill-defined  
 disorder      Illusion      Inappropriate antidiuretic hormone secretion  
 Incontinence      Increased appetite      Induration      Infection  
 Infectious mononucleosis      Infestation      Inflammation  
 Influenza      Injection site pain      Injection site reaction  
 Insomnia      Intraocular pressure increased      Irritability  
 Jaundice      Joint swelling      Laryngitis      Laryngospasm  
 Lethargy      Leukocytosis      Leukopenia      Libido decreased  
 Libido increased      Liver function test abnormal      Liver injury  
 Local reaction      Logorrhoea      Loss of consciousness      Loss of  
 libido      Lung disorder      Lymphadenopathy      Major depression  
 Malaise      Mania      Mean arterial pressure      Mediastinal disorder  
 Melaena      Memory impairment      Menstrual disorder  
 Menstruation irregular      Mental disability      Mental disorder  
 Mental retardation      Micturition urgency      Migraine  
 Miosis      Mood swings      Motion sickness      Movement disorder  
 Muscle relaxant therapy      Muscle rigidity      Muscle spasms  
 Muscle spasticity      Muscle twitching      Muscular weakness  
 Musculoskeletal discomfort      Musculoskeletal disorder  
 Musculoskeletal stiffness      Myalgia      Mydriasis      Myoclonus  
 Nasal congestion      Nasopharyngitis      Nausea      Neck pain  
 Necrosis      Nervous system disorder      Nervousness      Neuritis  
 Neuroleptic malignant syndrome      Neuropathy peripheral  
 Neutropenia      Nightmare      Nocturia      Nodal rhythm      Nodule  
 Nystagmus      Obstruction      Obstructive airways disorder      Oedema  
 Oedema peripheral      Oliguria      Oropharyngeal pain      Orthostatic  
 hypotension      Osteoarthritis      Otitis media      Pain      Pain in extremity  
 Pain in jaw      Pallor      Palpitations      Pancytopenia  
 Paraesthesia      Paraesthesia oral      Paralysis      Paresis  
 Pelvic pain      Penile discharge      Pericardial effusion      Periorbital  
 oedema      Personality disorder      Phaeochromocytoma      Pharyngitis  
 Phlebitis      Photophobia      Photosensitivity reaction  
 Pigmentation disorder      Platelet count decreased      Pleurisy  
 Pneumonia      Pneumothorax      Pollakiuria      Polyuria      Post-  
 traumatic stress disorder      Precocious puberty      Premenstrual  
 syndrome      Presyncope      Proctalgia      Prothrombin level increased  
 Pruritus      Psychomotor retardation      Psychotic disorder  
 Puberty      Pulmonary congestion      Pulmonary function test

decreased Pulmonary haemorrhage Pulmonary hypertension Pulmonary  
 oedema Purpura Rash Rash maculo-papular Rectal  
 haemorrhage Rectal tenesmus Renal failure Respiratory arrest  
 Respiratory depression Respiratory disorder Respiratory  
 failure Respiratory moniliasis Respiratory rate decreased  
 Respiratory tract congestion Respiratory tract infection  
 Retching Retrograde amnesia Rhinitis allergic Rhinorrhoea  
 Rhonchi Salivary hypersecretion Scotoma Sedation  
 Sexual dysfunction Shock Sinus tachycardia Sinusitis Skin  
 burning sensation Skin discolouration Skin disorder Skin  
 exfoliation Skin necrosis Sleep apnoea syndrome Sleep disorder  
 Sleep talking Sluggishness Sneezing Somnambulism  
 Somnolence Speech disorder Stevens-Johnson syndrome  
 Stomatitis Strabismus Stridor Stupor Substance abuse  
 Suicidal ideation Swelling Swelling face Swollen tongue  
 Syncope Tachycardia Tachypnoea Tenderness Tendonitis  
 Tension Therapeutic response decreased Thinking abnormal  
 Thirst Thrombocytopenia Thrombocytosis Thrombophlebitis  
 Thrombosis Thyroid neoplasm Tinnitus Tongue coated  
 Tongue disorder Tongue oedema Tooth disorder Toothache  
 Toxic epidermal necrolysis Transaminases increased  
 Tremor Tropical spastic paresis Ulcer Upper airway  
 obstruction Upper respiratory tract infection Urethral disorder  
 Urinary hesitation Urinary incontinence Urinary retention  
 Urinary tract disorder Urinary tract infection Urine  
 colour abnormal Urine output increased Urticaria Vaginal discharge  
 Vaginal infection Vaginal inflammation Vascular purpura  
 Vasodilation procedure Venous thrombosis Ventricular arrhythmia  
 Ventricular extrasystoles Vertigo Viral infection  
 Vision blurred Visual acuity reduced Visual impairment  
 Vomiting Weight decreased Weight increased Wheezing  
 Withdrawal syndrome Xeroderma Xerophthalmia Yawning

\*\*\*\*\*  
 \*\*\*\*\*

Hepatocyte growth factor receptor - Group: Enzyme

Treated with:

k-252a: experimental small molecule (0 associated side effects)

1-(4-fluorophenyl)-n-[3-fluoro-4-(1h-pyrrolo[2,3-b]pyridin-4-yloxy)phenyl]-2-oxo-1,2-dihydropyridine-3-carboxamide:

experimental small molecule (0 associated side effects)

n-({4-[(2-aminopyridin-4-yl)oxy]-3-fluorophenyl}carbamoyle)-2-(4-fluorophenyl)acetamide: experimental small molecule (0 associated side effects)

2-(4-fluorophenyl)-n-{{3-fluoro-4-(1h-pyrrolo[2,3-b]pyridin-4-yloxy)phenyl}carbamoyle}acetamide: experimental small molecule (0 associated side effects)

n-(3-chlorophenyl)-n-methyl-2-oxo-3-[(3,4,5-trimethyl-1h-pyrrol-2-yl)methyl]-2h-indole-5-sulfonamide: experimental small molecule (0 associated side effects)

3-[3-(4-methylpiperazin-1-yl)-7-(trifluoromethyl)quinoxalin-5-yl]phenol: experimental small molecule (0 associated side effects)



6-{{6-(1-methyl-1h-pyrazol-4-yl)[1,2,4]triazolo[4,3-b]pyridazin-3-yl}sulfanyl}quinoline: experimental small molecule (0 associated side effects)  
3-[(1r)-1-(2,6-dichloro-3-fluorophenyl)ethoxy]-5-(1-piperidin-4-yl-1h-pyrazol-4-yl)pyridin-2-amine: experimental small molecule (0 associated side effects)  
1-[(2-nitrophenyl)sulfonyl]-1h-pyrrolo[3,2-b]pyridine-6-carboxamide: experimental small molecule (0 associated side effects)

known side effects mediated through drugs targeting this protein:

\*\*\*\*\*  
\*\*\*\*\*

Voltage-dependent calcium channel subunit alpha-2/delta-1 - Group: Channel

Treated with:

isradipine: approved small molecule (0 associated side effects)  
For the management of mild to moderate essential hypertension.

It may be used alone or concurrently with thiazide-type diuretics.  
ibutilide: approved small molecule (53 associated side effects)

Indicated for the rapid conversion of atrial fibrillation or atrial flutter of recent onset to sinus rhythm.

amlodipine: approved small molecule (136 associated side effects) For the treatment of hypertension and chronic stable angina.

nisoldipine: approved small molecule (161 associated side effects) For the treatment of hypertension. It may be used alone or in combination with other antihypertensive agents.

nicardipine: approved small molecule (107 associated side effects) Used for the management of patients with chronic stable angina and for the treatment of hypertension.

magnesium sulfate: approved small molecule (0 associated side effects) Used for immediate control of life-threatening convulsions in the treatment of severe toxemias (pre-eclampsia and eclampsia) of pregnancy and in the treatment of acute nephritis in children. Also indicated for replacement therapy in magnesium deficiency, especially in acute hypomagnesemia accompanied by signs of tetany similar to those of hypocalcemia. Also used in uterine tetany as a myometrial relaxant.

gabapentin: approved small molecule (456 associated side effects) For the management of postherpetic neuralgia in adults and as adjunctive therapy in the treatment of partial seizures with and without secondary generalization in patients over 12 years of age with epilepsy.

felodipine: approved small molecule (96 associated side effects)  
For the treatment of mild to moderate essential hypertension.

nitrendipine: approved small molecule (0 associated side effects) For the treatment of mild to moderate hypertension

nifedipine: approved small molecule (217 associated side effects) For the management of vasospastic angina, chronic stable angina, hypertension, and Raynaud's phenomenon. May be used as a first line agent for left ventricular hypertrophy and isolated systolic hypertension (long-acting agents).

cyclandelate: approved small molecule (0 associated side effects) Used in the treatment of various blood vessel diseases

(e.g., claudication, arteriosclerosis and Raynaud's disease) and nighttime leg cramps.

nilvadipine: approved small molecule (0 associated side effects) For the management of vasospastic angina, chronic stable angina and hypertension.

589 known side effects mediated through drugs targeting this protein:

Abdominal discomfort Abdominal pain Abnormal dreams Abnormal faeces Abscess Accommodation disorder Acidosis Acne Acute coronary syndrome Acute generalised exanthematous pustulosis Affect lability Ageusia Agitation Alcohol intolerance Alopecia Amblyopia Amenorrhoea Amnesia Anaemia Anaphylactic shock Angina pectoris Angioedema Angiopathy Anorectal disorder Antisocial behaviour Antisocial personality disorder Anuria Anxiety Anxiety disorder Aortic dissection Apathy Aphasia Apnoea Apraxia Areflexia Arrhythmia Arteriosclerosis Arthralgia Arthritis Arthropathy Asocial behaviour Aspiration Asthenia Asthma Ataxia Atrial fibrillation Atrioventricular block first degree Atrioventricular block second degree Aura Back pain Bezoar Bladder pain Bleeding time prolonged Blepharitis Blindness Blindness transient Blister Blood alkaline phosphatase increased Blood creatine phosphokinase increased Blood creatinine increased Blood lactate dehydrogenase increased Blood pressure increased Blood urea abnormal Blood urea increased Blood uric acid Body temperature increased Bone pain Bradycardia Breast cancer Breast engorgement Breast enlargement Breast pain Bronchitis Bronchospasm Bundle branch block Bursitis Candidiasis Capillary fragility increased Cardiac arrest Cardiac disorder Cardiac failure Cardiac failure congestive Cardiac fibrillation Cardiac murmur Cardiogenic shock Cardiovascular disorder Cataract Cellulitis Central nervous system neoplasm Cerebellar syndrome Cerebral ischaemia Cerebrovascular accident Cheilitis Chest discomfort Chest pain Chills Cholecystitis Cholelithiasis Cholestasis Choreoathetosis Chorioretinitis Chronic obstructive pulmonary disease Coagulopathy Cold sweat Colitis Coma Completed suicide Confusional state Conjunctival hyperaemia Conjunctivitis Connective tissue disorder Constipation Conversion disorder Convulsion Coombs direct test positive Coordination abnormal Corneal disorder Costochondritis Cough Crocodile tears syndrome Cushingoid Cystitis Cystitis noninfective Dandruff Deafness Decreased appetite Deep vein thrombosis Dehydration Dependence Depersonalisation Depressed level of consciousness Dermatitis Dermatitis bullous Dermatitis exfoliative Diabetes mellitus Diabetic ketoacidosis Diabetic retinopathy Diaphragmatic hernia Diarrhoea Diplopia Discomfort Disease progression Dissociation Disturbance in attention Disturbance in sexual arousal Dizziness Dizziness postural Drug abuse Dry eye Dry mouth Dry skin Dry throat Duodenal ulcer Dysaesthesia Dysarthria Dysgeusia Dyskinesia Dysmenorrhoea Dyspepsia Dysphagia Dysphonia Dyspnoea Dystonia Dysuria Ear disorder Ear

infection Ear pain Ecchymosis Eczema Effusion Ejaculation  
disorder Electrocardiogram ST segment Electrocardiogram ST segment  
depression Electrocardiogram T wave inversion Electrocardiogram  
abnormal Embolism Encephalopathy Eosinophilia  
Epididymitis Epistaxis Erectile dysfunction Eructation  
Erythema Erythema multiforme Erythema nodosum  
Erythromelalgia Euphoric mood Eustachian tube disorder  
Extensor plantar response Extrasystoles Eye disorder  
Eye haemorrhage Eye pain Eye pruritus Eyelid ptosis  
Face oedema Faecal incontinence Fasting Fatigue  
Feeling abnormal Feeling hot Feeling jittery Flat affect  
Flatulence Fluid retention Flushing Fungal skin infection  
Furuncle Gait disturbance Gamma-glutamyltransferase  
increased Gastritis Gastroenteritis Gastrointestinal disorder  
Gastrointestinal haemorrhage Gastrointestinal obstruction  
Gastrointestinal pain Gastrointestinal tract irritation  
Gastrooesophageal reflux disease Generalised oedema  
Genital discharge Gingival bleeding Gingival disorder Gingival  
hyperplasia Gingivitis Glaucoma Glomerulonephritis membranous  
Glossitis Glycosuria Goitre Gout Gynaecomastia  
Haematemesis Haematochezia Haematoma Haematuria  
Haemoglobin decreased Haemolysis Haemolytic anaemia  
Haemoptysis Haemorrhage Haemorrhage intracranial  
Haemorrhoids Hair disorder Hallucination Hangover  
Headache Hearing impaired Hemiplegia Hepatic enzyme  
increased Hepatic failure Hepatic function abnormal Hepatitis  
Hepatitis cholestatic Hepatitis fulminant Hepatobiliary  
disease Hepatomegaly Hernia Herpes simplex Herpes  
virus infection Herpes zoster Hiccups Hirsutism Hordeolum  
Hostility Hot flush Hyperaemia Hyperaesthesia  
Hypercholesterolaemia Hyperglycaemia Hyperhidrosis  
Hyperkinesia Hyperlipidaemia Hyperplasia Hyperreflexia  
Hypersensitivity Hypertension Hypertonia Hypertrophy  
Hyperventilation Hypoaesthesia Hypoglycaemia  
Hypokalaemia Hypokinesia Hyponatraemia Hypophosphataemia  
Hyporeflexia Hypotension Hypothyroidism Hypotonia  
Hypoventilation Hypoxia Ill-defined disorder Immune  
system disorder Incontinence Increased appetite Infarction  
Infection Infectious mononucleosis Infestation  
Inflammation Influenza Injection site pain Injection  
site reaction Inner ear disorder Insomnia Intentional self-  
injury Interstitial lung disease Intestinal functional  
disorder Intestinal obstruction Intestinal ulcer Iritis  
Irritability Irritable bowel syndrome Ischaemia  
Jaundice Joint stiffness Joint swelling Keratitis  
Ketoacidosis Laboratory test abnormal Labyrinthitis  
Lacrimation increased Laryngitis Lethargy Leukocytoclastic  
vasculitis Leukocytosis Leukopenia Libido decreased Libido  
increased Lip haemorrhage Liver function test abnormal Loss of  
consciousness Loss of libido Lung disorder Lymphadenopathy  
Lymphocytosis Lymphoma Malaise Mania Mass Mediastinal  
disorder Melaena Melanosis Memory impairment Meningism  
Menopausal symptoms Menorrhagia Menstrual disorder  
Mental disability Mental disorder Metabolic acidosis  
Micturition disorder Micturition urgency Migraine

Miosis Mood swings Mouth ulceration Movement disorder  
Mucosal inflammation Mucous membrane disorder Muscle  
contracture Muscle relaxant therapy Muscle spasms Muscle  
twitching Muscular weakness Musculoskeletal discomfort  
Musculoskeletal stiffness Myalgia Myocardial infarction  
Myocardial ischaemia Myoclonus Myositis Nail disorder  
Nasal congestion Nasal obstruction Nasopharyngitis Nausea  
Neck mass Neck pain Necrosis Neoplasm Neoplasm  
malignant Nephrolithiasis Nephrotic syndrome Nervous system  
disorder Nervousness Neuropathy peripheral Neurosis Nightmare  
Nocturia Nodal arrhythmia Nodule Nystagmus Obstruction  
Obstructive airways disorder Occipital neuralgia Oedema  
Oedema peripheral Oesophageal disorder Oesophageal spasm  
Oesophagitis Oliguria Oral candidiasis Oropharyngeal  
discomfort Oropharyngeal pain Orthostatic hypotension  
Osteoarthritis Osteoporosis Otitis externa Otitis  
media Ovarian failure Pain Pain in extremity Palpitations  
Pancreatitis Papule Paraesthesia Paraesthesia oral  
Paralysis Paranoia Paresis Parosmia Pelvic pain  
Penile swelling Penis disorder Peptic ulcer Pericardial  
effusion Pericardial haemorrhage Pericardial rub  
Pericarditis Periorbital oedema Peripheral ischaemia  
Peripheral vascular disorder Personality disorder Petechiae  
Pharyngitis Phlebitis Photophobia Photosensitivity reaction  
Platelet disorder Pleural disorder Pleural effusion Pneumonia  
aspiration Poisoning Pollakiuria Polyuria Proctitis Prothrombin  
level decreased Pruritus Pruritus genital Pseudolymphoma  
Psoriasis Psychotic disorder Pulmonary congestion  
Pulmonary embolism Pulmonary oedema Pulmonary thrombosis  
Purpura Pyelonephritis Pyuria Rales Rash Rash  
erythematous Rash maculo-papular Rash pustular Rectal  
haemorrhage Regurgitation Renal failure Renal failure acute  
Renal failure chronic Renal impairment Renal pain Respiratory  
disorder Respiratory failure Respiratory tract congestion  
Respiratory tract infection Retinal degeneration Retinal  
detachment Retinal disorder Retinal vein thrombosis Rhinitis  
Rhinitis seasonal Rhinorrhoea Rhythm idioventricular Salivary  
gland enlargement Salivary hypersecretion Scotoma Scrotal  
disorder Scrotal swelling Seasonal allergy Seborrhoeic dermatitis  
Sepsis Sexual dysfunction Shock Sinus arrhythmia Sinus  
bradycardia Sinus tachycardia Sinusitis Skin cancer Skin  
discolouration Skin disorder Skin exfoliation Skin hypertrophy  
Skin necrosis Skin odour abnormal Skin ulcer Sleep  
disorder Sneezing Snoring Somnambulism Somnolence  
Speech disorder Sticky skin Stomatitis Strabismus Stridor  
Stupor Subcutaneous nodule Subdural haematoma  
Suicidal behaviour Suicide attempt Supraventricular  
extrasystoles Supraventricular tachycardia Swelling Syncope  
Tachyarrhythmia Tachycardia Tenderness Tendon disorder  
Tendonitis Tenosynovitis Tension Testicular pain  
Thinking abnormal Thirst Thrombocytopenia Thrombophlebitis  
Thrombosis Thyroiditis Tinnitus Tongue disorder Tooth  
abscess Tooth discolouration Tooth disorder Toxic epidermal  
necrolysis Tremor Ulcer Upper respiratory tract infection  
Urethral disorder Urinary incontinence Urinary retention

Urinary tract disorder Urinary tract infection Urine  
abnormality Urine analysis abnormal Urine output increased  
Urogenital disorder Urticaria Uterovaginal prolapse VIIth  
nerve paralysis Vaginal haemorrhage Vaginal infection Vaginal  
inflammation Varicose vein Vascular purpura Vasculitis  
Vasodilation procedure Venous insufficiency Venous thrombosis  
Ventricular arrhythmia Ventricular extrasystoles Ventricular  
tachycardia Vertigo Vestibular disorder Viral diarrhoea Viral  
infection Vision blurred Visual acuity reduced Visual impairment  
Vitreous floaters Vomiting Vulvovaginal candidiasis  
Vulvovaginal mycotic infection Vulvovaginal pain Weight  
decreased Weight increased Wheezing White blood cell count  
decreased Xerophthalmia

\*\*\*\*\*  
\*\*\*\*\*

D(3) dopamine receptor - Group: Receptor

Treated with:

ziprasidone: approved small molecule (251 associated side effects) For the treatment of schizophrenia and related psychotic disorders.

cabergoline: approved small molecule (96 associated side effects) For the treatment of hyperprolactinemic disorders, either idiopathic or due to prolactinoma (prolactin-secreting adenomas). May also be used to manage symptoms of Parkinsonian Syndrome as monotherapy during initial symptomatic management or as an adjunct to levodopa therapy during advanced stages of disease.

ropinirole: approved small molecule (631 associated side effects) For the treatment of the signs and symptoms of idiopathic Parkinson's disease. Also used for the treatment of restless legs syndrome.

olanzapine: approved small molecule (393 associated side effects) For the acute and maintenance treatment of schizophrenia and related psychotic disorders, as well as acute treatment of manic or mixed episodes of bipolar 1 disorder. Intramuscular olanzapine is indicated for the rapid control of agitated patients.

clozapine: approved small molecule (228 associated side effects) For use in patients with treatment-resistant schizophrenia.

sulpiride: approved small molecule (0 associated side effects)

Sulpiride is indicated for the treatment of schizophrenia.

remoxipride: approved, withdrawn small molecule (0 associated side effects) Remoxipride is an atypical antipsychotic once used for the treatment of schizophrenia.

pramipexole: approved small molecule (620 associated side effects) For the treatment of signs and symptoms of idiopathic Parkinson's disease

haloperidol: approved small molecule (79 associated side effects) For the management of psychotic disorders (eg. schizophrenia) and delirium, as well as to control tics and vocal utterances of Tourette's syndrome (Gilles de la Tourette's syndrome). Also used for the treatment of severe behavioural problems in children with disruptive behaviour disorder or ADHD (attention-deficit hyperactivity disorder). Haloperidol has been used in the prevention and control of severe nausea and vomiting.

lisuride: approved small molecule (0 associated side effects)  
For the management of Parkinson's Disease

apomorphine: approved small molecule (45 associated side effects) For the acute, intermittent treatment of hypomobility, off episodes (end-of-dose wearing off and unpredictable on/off episodes) associated with advanced Parkinson's disease.

risperidone: approved small molecule (532 associated side effects) For the treatment of schizophrenia in adults and in adolescents, ages 13 to 17, and for the short-term treatment of manic or mixed episodes of bipolar I disorder in children and adolescents ages 10 to 17. May also be used to manage symptoms of inappropriate behavior due to aggression and/or psychosis in patients with severe dementia.

dopamine: approved small molecule (23 associated side effects)  
For the correction of hemodynamic imbalances present in the shock syndrome due to myocardial infarction, trauma, endotoxic septicemia, open-heart surgery, renal failure, and chronic cardiac decompensation as in congestive failure

pimozide: approved small molecule (68 associated side effects)  
Used for the suppression of motor and phonic tics in patients with Tourette's Disorder who have failed to respond satisfactorily to standard treatment.

domperidone: approved small molecule (40 associated side effects) For management of dyspepsia, heartburn, epigastric pain, nausea, and vomiting.

pergolide: approved, withdrawn small molecule (354 associated side effects) Indicated as adjunctive treatment to levodopa/carbidopa in the management of the signs and symptoms of Parkinson's disease. It was withdrawn from the US and Canadian markets in 2007 due to an increased risk of cardiac valvulopathy.

bromocriptine: approved small molecule (120 associated side effects) For the treatment of galactorrhea due to hyperprolactinemia, prolactin-dependent menstrual disorders and infertility, prolactin-secreting adenomas, prolactin-dependent male hypogonadism, as adjunct therapy to surgery or radiotherapy for acromegaly or as monotherapy in special cases, as monotherapy in early Parkinsonian Syndrome or as an adjunct with levodopa in advanced cases with motor complications. Bromocriptine has also been used off-label to treat restless legs syndrome and neuroleptic malignant syndrome.

quetiapine: approved small molecule (359 associated side effects) For the treatment of schizophrenia and related psychotic disorders.

aripiprazole: approved small molecule (630 associated side effects) For the treatment of schizophrenia and related psychotic disorders.

chlorprothixene: approved small molecule (0 associated side effects) For treatment of psychotic disorders (e.g. schizophrenia) and of acute mania occurring as part of bipolar disorders.

paliperidone: approved small molecule (216 associated side effects) For the treatment of schizophrenia.

yohimbine: approved small molecule (0 associated side effects)  
Indicated as a sympatholytic and mydriatic. Impotence has been successfully treated with yohimbine in male patients with vascular or diabetic origins and psychogenic origins.

methotrimeprazine: approved small molecule (0 associated side effects) For the treatment of psychosis, particular those of schizophrenia, and manic phases of bipolar disorder.

rotigotine: approved small molecule (93 associated side effects) For use/treatment in neurologic disorders and parkinson's disease as well as moderate-to-severe primary Restless Legs Syndrome.

amisulpride: approved small molecule (0 associated side effects) Investigated for use/treatment in schizophrenia and schizoaffective disorders, mania in bipolar disorder, and depression.

1255 known side effects mediated through drugs targeting this protein:

Abasia Abdominal adhesions Abdominal discomfort Abdominal distension Abdominal neoplasm Abdominal pain Abdominal pain lower Abdominal pain upper Abdominal tenderness Abnormal behaviour Abnormal dreams Abnormal faeces Abscess Accommodation disorder Acidosis Acne Actinic keratosis Acute abdomen Acute coronary syndrome Acute lymphocytic leukaemia Acute psychosis Acute tonsillitis Adenocarcinoma Adenoma benign Adhesion Affect lability Affective disorder Ageusia Aggression Agitation Agoraphobia Agranulocytosis Akathisia Akinesia Alanine aminotransferase increased Albright's disease Albuminuria Alcohol intolerance Alkalosis Alopecia Altered state of consciousness Amaurosis fugax Amblyopia Amenorrhoea Amnesia Anaemia Anaemia macrocytic Anaemia megaloblastic Anaphylactic shock Anaphylactoid reaction Aneurysm Anger Angina pectoris Angina unstable Angioedema Angiomyolipoma Angiopathy Angle closure glaucoma Anorectal discomfort Anorectal disorder Anorgasmia Antidiuretic hormone abnormality Antisocial behaviour Antisocial personality disorder Anxiety Aortic dissection Apathy Aphasia Aphthous stomatitis Aplastic anaemia Apnoea Appendicitis Application site reaction Apraxia Argininosuccinate synthetase deficiency Arrhythmia Arrhythmia supraventricular Arterial disorder Arterial occlusive disease Arterial stenosis Arteriosclerosis Arteritis Arthralgia Arthritis Arthropathy Ascites Asocial behaviour Aspartate aminotransferase increased Asphyxia Aspiration Asthenia Asthma Ataxia Atelectasis Atrial fibrillation Atrial flutter Atrial septal defect Atrioventricular block first degree Atrioventricular block second degree Atrophy Aura Automatism Azotaemia Back pain Bacterial infection Balance disorder Balanoposthitis Basal cell carcinoma Basophilia Benign intracranial hypertension Benign neoplasm Benign neoplasm of skin Benign prostatic hyperplasia Biliary colic Binge eating Bladder cancer Bladder disorder Bladder pain Blepharitis Blepharospasm Blindness Blindness transient Blister Blood alkaline phosphatase increased Blood amylase increased Blood antidiuretic hormone abnormal Blood bilirubin increased Blood cholesterol increased Blood creatine phosphokinase increased Blood creatinine increased Blood disorder Blood electrolytes abnormal Blood glucose decreased Blood glucose increased Blood

insulin increased Blood iron decreased Blood lactate dehydrogenase  
increased Blood phosphorus increased Blood potassium decreased  
Blood potassium increased Blood pressure abnormal Blood  
pressure diastolic decreased Blood pressure fluctuation Blood  
pressure increased Blood pressure systolic decreased Blood  
prolactin increased Blood testosterone decreased Blood  
triglycerides increased Blood triglycerides normal Blood urea  
increased Blood uric acid increased Blood urine Blood urine  
present Blunted affect Body temperature decreased Body  
temperature increased Bone disorder Bone pain Bone sarcoma  
Bradycardia Bradykinesia Bradyphrenia Brain neoplasm  
Brain neoplasm benign Brain oedema Breast cancer  
Breast cyst Breast discharge Breast discomfort Breast disorder  
Breast disorder female Breast disorder male Breast  
engorgement Breast enlargement Breast feeding Breast neoplasm  
Breast pain Breast swelling Breast tenderness Breath odour  
Bronchiolitis Bronchitis Bronchopneumonia  
Bronchopneumopathy Bronchospasm Bruxism  
Buccoglossal syndrome Bulimia nervosa Bundle branch block  
Bundle branch block left Bundle branch block right  
Burning sensation Bursitis Cachexia Calculus bladder  
Calculus urinary Cancer in remission Candidiasis  
Carbohydrate tolerance decreased Cardiac arrest Cardiac  
disorder Cardiac failure Cardiac failure congestive Cardiac  
fibrillation Cardiac flutter Cardiac murmur Cardiac septal  
defect Cardiac valve disease Cardio-respiratory arrest  
Cardiomegaly Cardiomyopathy Cardiopulmonary failure  
Cardiovascular disorder Carotid artery occlusion  
Carpal tunnel syndrome Cataplexy Cataract Catatonia Cells  
in urine Cellulitis Cerebral artery embolism Cerebral atrophy  
Cerebral haemorrhage Cerebral infarction Cerebral  
ischaemia Cerebrospinal fluid rhinorrhoea Cerebrovascular  
accident Cerebrovascular disorder Cervicitis Cervix carcinoma  
Chapped lips Cheilitis Chest discomfort Chest pain  
Chills Choking Cholecystitis Cholecystitis chronic  
Cholelithiasis Cholestasis Chorea Choreoathetosis  
Chromaturia Chronic lymphocytic leukaemia Chronic  
obstructive pulmonary disease Coagulopathy Coccydynia  
Cognitive disorder Cogwheel rigidity Cold sweat Colitis  
Colitis ulcerative Colon cancer Colorectal cancer Coma  
Completed suicide Compulsions Condition aggravated Conduction  
disorder Confusional state Congenital anomaly Congenital eye  
disorder Congenital foot malformation Congenital genitourinary  
abnormality Conjunctival haemorrhage Conjunctivitis Connective  
tissue disorder Constipation Convulsion Coordination abnormal  
Corneal lesion Coronary artery disease Coronary artery  
occlusion Costochondritis Cough Crocodile tears syndrome  
Crying Cyanosis Cystitis Cystitis noninfective  
Cytolytic hepatitis Dandruff Deafness Death Decreased  
appetite Decubitus ulcer Deep vein thrombosis Deficiency  
anaemia Dehydration Delirium Delusion Dementia Dementia  
with Lewy bodies Dental caries Dependence Depersonalisation  
Depressed level of consciousness Depressed mood Depression  
Depressive symptom Derealisation Dermal cyst Dermatitis  
atopic Dermatitis bullous Dermatitis contact Dermatitis



exfoliative Dermatitis infected Dermoid cyst Developmental  
 delay Diabetes mellitus Diabetic coma Diabetic hyperglycaemic coma  
 Diabetic hyperosmolar coma Diabetic ketoacidosis  
 Diaphragmatic hernia Diarrhoea Diplopia Discomfort  
 Disorientation Disseminated intravascular coagulation  
 Dissociation Disturbance in attention Disturbance in  
 sexual arousal Diverticulitis Dizziness Dizziness exertional  
 Dizziness postural Drooling Drug abuse Drug dependence  
 Drug eruption Drug hypersensitivity Drug ineffective Drug  
 interaction Drug intolerance Drug level increased Drug withdrawal  
 syndrome Drug withdrawal syndrome neonatal Dry eye Dry mouth  
 Dry skin Dry throat Duodenal ulcer Duodenal ulcer  
 haemorrhage Duodenitis Dysarthria Dysentery Dysgeusia Dysgraphia  
 Dyskinesia Dysmenorrhoea Dyspepsia Dysphagia Dysphemia  
 Dysphonia Dysphoria Dyspnoea Dyspnoea exertional  
 Dystonia Dysuria Ear disorder Ear infection Ear  
 pain Ecchymosis Eclampsia Eczema Effusion Ejaculation  
 delayed Ejaculation disorder Ejaculation failure Elastosis  
 perforans Elderly Electrocardiogram QRS complex  
 Electrocardiogram QT prolonged Electrocardiogram ST segment  
 depression Electrocardiogram ST segment elevation Electrocardiogram  
 T wave inversion Electrocardiogram abnormal Electrocardiogram  
 change Electrocardiogram normal Electroencephalogram  
 abnormal Electrolyte imbalance Embolism Emotional distress  
 Emphysema Encephalopathy Endocrine disorder Endometrial  
 cancer Endometrial neoplasm Energy increased Enteritis  
 Enuresis Enzyme abnormality Eosinophil count increased  
 Eosinophilia Epicondylitis Epididymitis Epilepsy  
 Epistaxis Erectile dysfunction Eructation Erythema  
 Erythema multiforme Erythromelalgia Euphoric mood  
 Exfoliative rash Exostosis Extrapyrarnidal disorder  
 Extrasystoles Eye discharge Eye disorder Eye  
 haemorrhage Eye infection Eye inflammation Eye irritation Eye  
 movement disorder Eye pain Eye swelling Eyelid disorder  
 Eyelid function disorder Eyelid oedema Eyelid ptosis  
 Face oedema Facial pain Facial paresis Faecal incontinence  
 Faecalith Faecaloma Faeces discoloured Faeces hard  
 Fasciitis Fasting Fatigue Fear Feeling abnormal  
 Feeling cold Feeling hot Feeling jittery Female sexual  
 dysfunction Fibroadenoma of breast Fibrocystic breast disease  
 Fibrosis Flank pain Flat affect Flatulence Fluid overload  
 Fluid retention Flushing Folliculitis Formication  
 Fungal infection Fungal skin infection Furuncle Gait  
 disturbance Galactorrhoea Gallbladder cancer Gallbladder  
 disorder Gamma-glutamyltransferase increased Gangrene  
 Gastric cancer Gastric disorder Gastric haemorrhage  
 Gastric pH decreased Gastric polyps Gastric ulcer  
 Gastric ulcer haemorrhage Gastritis Gastritis haemorrhagic  
 Gastroenteritis Gastrointestinal disorder Gastrointestinal  
 haemorrhage Gastrointestinal infection Gastrointestinal neoplasm  
 Gastrointestinal obstruction Gastrointestinal pain  
 Gastrointestinal stromal tumour Gastrooesophageal reflux  
 disease Generalised oedema Genital candidiasis Genital  
 discharge Gestational hypertension Gingival bleeding Gingival  
 infection Gingival pain Gingivitis Glaucoma Glossitis

Glossodynia Glucose tolerance decreased Glucose tolerance  
 impaired Glycosuria Glycosylated haemoglobin increased Goitre  
 Gout Grand mal convulsion Gravitational oedema Groin pain  
 Gynaecomastia Haemangioma Haematemesis Haematochezia  
 Haematocrit decreased Haematoma Haematuria Haemoglobin  
 Haemoglobin decreased Haemoglobin increased Haemolysis  
 Haemoptysis Haemorrhage Haemorrhage intracranial  
 Haemorrhoids Haemothorax Hallucination Hallucination,  
 auditory Hallucination, visual Hangover Head discomfort Head  
 titubation Headache Hearing impaired Heart disease congenital  
 Heart rate irregular Hemianopia Hemiparesis Hemiplegia  
 Hepatic enzyme increased Hepatic failure Hepatic function  
 abnormal Hepatic neoplasm malignant Hepatic steatosis Hepatitis  
 Hepatitis cholestatic Hepatobiliary disease Hepatocellular  
 injury Hepatomegaly Hereditary disorder Hernia  
 Herpes simplex Herpes virus infection Herpes zoster  
 Hiccups Hirsutism Homicidal ideation Hordeolum  
 Hormone level abnormal Hostility Hot flush Hunger  
 Hydrocephalus Hyperacusis Hyperaemia Hyperaesthesia  
 Hyperammonaemia Hyperbilirubinaemia Hyperchloraemia  
 Hyperchlorhydria Hypercholesterolaemia Hyperglycaemia  
 Hyperhidrosis Hyperinsulinism Hyperkalaemia  
 Hyperkeratosis Hyperkinesia Hyperlipidaemia  
 Hypernatraemia Hyperparathyroidism Hyperphagia  
 Hyperphosphataemia Hyperplasia Hyperprolactinaemia  
 Hyperpyrexia Hyperreflexia Hypersensitivity  
 Hypersexuality Hypersomnia Hypertension Hypertensive  
 crisis Hyperthermia Hyperthyroidism Hypertonia Hypertonic  
 bladder Hypertrichosis Hypertriglyceridaemia Hypertrophy  
 Hyperuricaemia Hyperuricosuria Hyperventilation  
 Hypoaesthesia Hypoaesthesia oral Hypocalcaemia  
 Hypochloraemia Hypocholesterolaemia Hypochromic anaemia  
 Hypoglycaemia Hypogonadism Hypohidrosis  
 Hypokalaemia Hypokinesia Hypomagnesaemia Hypomania  
 Hypomenorrhoea Hyponatraemia Hypophagia Hypoproteinaemia  
 Hyporeflexia Hypotension Hypothermia Hypothyroidism  
 Hypotonia Hypoventilation Hypovitaminosis Hypoxia  
 Idiopathic thrombocytopenic purpura Ileus Ileus paralytic  
 Ill-defined disorder Illusion Immune system disorder  
 Impaired healing Inappropriate antidiuretic hormone secretion  
 Incontinence Increased appetite Induration Infarction  
 Infected cyst Infection Infestation Inflammation  
 Influenza Influenza like illness Inguinal hernia Initial  
 insomnia Injection site mass Injection site pain Injection  
 site reaction Inner ear disorder Insomnia Intention tremor  
 Intentional self-injury Intermittent claudication  
 Interstitial lung disease Intervertebral disc degeneration  
 Intervertebral disc disorder Intervertebral disc protrusion  
 Intervertebral discitis Intestinal functional disorder  
 Intestinal obstruction Intestinal perforation Intracranial  
 pressure increased Iron deficiency Iron deficiency anaemia  
 Irritability Irritable bowel syndrome Ischaemia  
 Ischaemic hepatitis Ischaemic stroke Jaundice Jaundice  
 cholestatic Joint contracture Joint effusion Joint range of motion  
 decreased Joint stiffness Joint swelling Judgement impaired

Keratitis Keratoconjunctivitis sicca Ketoacidosis  
 Ketosis Laboratory test abnormal Lacrimal disorder  
 Lacrimation increased Lactose intolerance Laryngeal cancer  
 Laryngeal disorder Laryngeal neoplasm Laryngeal oedema  
 Laryngitis Laryngospasm Left ventricular failure  
 Leiomyoma Lens disorder Lenticular opacities Lenticular  
 pigmentation Lethargy Leukaemia Leukocytosis Leukoderma  
 Leukopenia Leukoplakia oral Libido decreased Libido increased  
 Lichenoid keratosis Lip and/or oral cavity cancer Lip  
 dry Lip swelling Lipoma Livedo reticularis Liver  
 disorder Liver function test abnormal Liver injury Lividity  
 Lobar pneumonia Localised infection Localised oedema  
 Logorrhoea Loss of consciousness Loss of libido Lower  
 respiratory tract infection Lung cancer metastatic Lung disorder  
 Lung infiltration Lung neoplasm malignant Lymphadenitis  
 Lymphadenopathy Lymphatic disorder Lymphocytic leukaemia  
 Lymphocytosis Lymphoedema Lymphoma Lymphopenia Macular  
 degeneration Macule Maculopathy Major depression Malaise  
 Male sexual dysfunction Malignant melanoma Mania  
 Masked facies Mastitis Mediastinal disorder Melaena  
 Melanocytic naevus Memory impairment Meningitis Menopausal  
 symptoms Menopause Menorrhagia Menstrual disorder  
 Menstruation delayed Menstruation irregular Mental disability  
 Mental disorder Mental retardation Mental status changes  
 Metabolic alkalosis Metastasis Metastatic neoplasm  
 Metrorrhagia Micturition disorder Micturition urgency  
 Middle ear disorder Middle ear effusion Middle insomnia  
 Migraine with aura Migraine without aura Miosis  
 Mitral valve incompetence Mobility decreased  
 Monarthrititis Monocytosis Mood swings Motion sickness Mouth  
 ulceration Movement disorder Multiple myeloma Muscle atrophy  
 Muscle contractions involuntary Muscle contracture  
 Muscle enzyme increased Muscle relaxant therapy  
 Muscle rigidity Muscle spasms Muscle tightness Muscle  
 twitching Muscular weakness Musculoskeletal chest pain  
 Musculoskeletal discomfort Musculoskeletal disorder  
 Musculoskeletal pain Musculoskeletal stiffness Myalgia  
 Myasthenic syndrome Mydriasis Myelitis Myocardial  
 infarction Myocardial ischaemia Myocarditis Myoclonus Myopathy  
 Myopia Myositis Nail disorder Nail infection  
 Narcolepsy Nasal congestion Nasal disorder Nasal dryness  
 Nasal oedema Nasal polyps Nasopharyngitis Nausea  
 Neck pain Necrosis Necrosis ischaemic Neoplasm  
 malignant Neoplasm prostate Neoplasm recurrence Neoplasm skin  
 Nephritis Nephrolithiasis Nephrotic syndrome Nerve root  
 lesion Nervous system disorder Nervousness Neuralgia  
 Neuritis Neurodermatitis Neurogenic bladder Neuroleptic  
 malignant syndrome Neurological symptom Neuroma Neuropathy  
 peripheral Neurosis Neutropenia Neutrophil count decreased  
 Neutrophil count increased Night sweats Nightmare  
 Nocturia Nodal arrhythmia Nodule Normochromic  
 normocytic anaemia Nuchal rigidity Nystagmus Obesity  
 Obsessive thoughts Obstruction Obstructive airways disorder  
 Ocular hyperaemia Oculogyric crisis Oedema Oedema peripheral  
 Oesophageal carcinoma Oesophageal disorder Oesophageal spasm

Oesophageal stenosis Oesophageal ulcer Oesophagitis  
 Oligomenorrhoea Oliguria Onychomycosis Opisthotonus  
 Oral candidiasis Oral neoplasm benign Oral pain Orchitis  
 noninfective Oropharyngeal discomfort Oropharyngeal pain  
 Oropharyngeal spasm Orthostatic hypotension  
 Osteoarthritis Osteoarthropathy Osteodystrophy  
 Osteomyelitis Osteonecrosis Osteopenia Osteoporosis  
 Otitis externa Otitis media Otitis media chronic  
 Ovarian cancer Ovarian cyst Pain Pain in extremity Pain  
 in jaw Pallor Palpitations Pancreatitis acute  
 Pancytopenia Panic attack Panic disorder Panic  
 disorder with agoraphobia Panic reaction Papilloma  
 Paraesthesia oral Paralysis Paranoia Parasomnia Paresis  
 Parkinsonian gait Parkinsonism Paronychia Parosmia  
 Pathological fracture Pathological gambling Pelvic pain Penis  
 disorder Peptic ulcer Pericardial effusion Pericarditis  
 constrictive Perineal pain Periodontitis Periorbital  
 oedema Peripheral coldness Peripheral ischaemia Peripheral  
 vascular disorder Peritoneal adhesions Personality disorder  
 Petechiae Pharyngeal erythema Pharyngitis Phlebitis  
 Phlebitis superficial Phobia Phonological disorder  
 Photophobia Photopsia Photosensitivity allergic reaction  
 Photosensitivity reaction Pigmentation disorder  
 Piloerection Pituitary tumour benign Plasmacytoma  
 Platelet count decreased Pleural disorder Pleural effusion  
 Pleural fibrosis Pleurisy Pneumonia Pneumonia aspiration  
 Pneumothorax Poisoning Poliomyelitis Pollakiuria  
 Polycythaemia Polydipsia Polymyalgia rheumatica Polyp  
 Polyuria Post procedural infection Postmenopausal  
 haemorrhage Postural orthostatic tachycardia syndrome Posture  
 abnormal Pre-eclampsia Precocious puberty Premature  
 ejaculation Premenstrual syndrome Presyncope Priapism Proctalgia  
 Productive cough Prolactinoma Prostate cancer Prostatic  
 adenoma Prostatic disorder Prostatitis Protein urine present  
 Proteinuria Protrusion tongue Prurigo Pruritus Pruritus  
 generalised Pruritus genital Pseudolymphoma Psoriasis Psychiatric  
 symptom Psychomotor retardation Psychotic disorder  
 Puberty Pulmonary congestion Pulmonary embolism  
 Pulmonary fibrosis Pulmonary hypertension Pulmonary oedema  
 Purpura Pyelonephritis Pyoderma Pyuria Rales Rash  
 erythematous Rash generalised Rash maculo-papular Rash  
 papular Rash pustular Rash vesicular Raynaud's phenomenon  
 Rectal cancer Rectal haemorrhage Rectal tenesmus Red  
 blood cell count decreased Red blood cell sedimentation rate  
 increased Reflux oesophagitis Regressive behaviour  
 Regurgitation Renal artery stenosis Renal colic Renal cyst  
 Renal failure acute Renal impairment Renal neoplasm Renal  
 pain Respiratory alkalosis Respiratory arrest Respiratory  
 disorder Respiratory distress Respiratory failure Respiratory  
 tract congestion Respiratory tract infection Respiratory tract  
 infection viral Restless legs syndrome Retching Retinal artery  
 occlusion Retinal detachment Retinal disorder Retinal vascular  
 disorder Retinitis pigmentosa Retrograde ejaculation  
 Retroperitoneal fibrosis Rhabdomyolysis Rheumatoid  
 arthritis Rhinitis Rhinitis allergic Rhinitis seasonal Rhinorrhoea

Rhonchi Rosacea Rotator cuff syndrome Sacroiliitis  
 Saliva altered Salivary duct obstruction Salivary gland  
 disorder Salivary gland enlargement Salivary hypersecretion  
 Salpingitis Sarcoidosis Sarcoma Scab Schizoaffective  
 disorder Schizophrenia Schizophreniform disorder Sciatica  
 Scotoma Seasonal allergy Seborrhoeic dermatitis Seborrhoeic  
 keratosis Sedation Sensation of heaviness Sensory disturbance  
 Sensory loss Sepsis Septic shock Severe acute  
 respiratory syndrome Sexual dysfunction Shock Sialoadenitis  
 Sicca syndrome Sick sinus syndrome Sinus arrhythmia Sinus  
 bradycardia Sinus congestion Sinus disorder Sinus headache Sinus  
 tachycardia Sinusitis Skin burning sensation Skin cancer Skin  
 discolouration Skin disorder Skin exfoliation Skin  
 hyperpigmentation Skin hypertrophy Skin infection Skin irritation  
 Skin lesion Skin mass Skin odour abnormal Skin papilloma  
 Skin ulcer Sleep apnoea syndrome Sleep attacks Sleep  
 disorder Sleep talking Sluggishness Small intestinal  
 obstruction Sneezing Snoring Social avoidant behavioural  
 Somnambulism Somnolence Speech disorder Spinal  
 osteoarthritis Spine malformation Splenomegaly Spondylitis  
 Squamous cell carcinoma Status epilepticus Stevens-  
 Johnson syndrome Sticky skin Stomatitis Stress Stridor  
 Stupor Subarachnoid haemorrhage Subcutaneous abscess  
 Subcutaneous nodule Subdural haematoma Sudden death  
 Suicidal ideation Suicide attempt Superior sagittal sinus  
 thrombosis Supraventricular extrasystoles Supraventricular  
 tachycardia Surgery Suspiciousness Swelling Swelling face  
 Swollen tongue Syncope Synostosis Synovitis Systemic  
 lupus erythematosus Tachycardia Tachypnoea Tardive dyskinesia  
 Tenderness Tendonitis Tenosynovitis Tension Tension  
 headache Terminal insomnia Testicular disorder Testicular pain  
 Tetany Therapeutic response decreased Therapeutic  
 response increased Thinking abnormal Thirst Thought blocking  
 Throat irritation Throat tightness Thrombocytopenia  
 Thrombocytopenic purpura Thrombocytosis Thrombophlebitis  
 Thrombosis Thrombotic thrombocytopenic purpura Thyroid  
 adenoma Thyroid cancer Thyroid neoplasm Thyroiditis Tic  
 Tinnitus Tongue discolouration Tongue disorder Tongue dry  
 Tongue oedema Tongue paralysis Tongue spasm Tongue  
 ulceration Tonsillar hypertrophy Tonsillitis Tooth abscess Tooth  
 disorder Tooth impacted Tooth infection Toothache Torsade de  
 pointes Torticollis Toxic epidermal necrolysis Tracheobronchitis  
 Transaminases increased Transient ischaemic attack  
 Tremor Trismus Tuberculin test positive  
 Tubulointerstitial nephritis Ulcer Ulcer haemorrhage Umbilical  
 hernia Unevaluable event Unintended pregnancy Unresponsive to  
 stimuli Upper respiratory tract infection Upper-airway cough  
 syndrome Urethral disorder Urethral pain Urethritis Urinary  
 hesitation Urinary incontinence Urinary retention Urinary tract  
 disorder Urinary tract infection Urine abnormality Urine  
 analysis abnormal Urine output increased Urosepsis Urticaria  
 Uterine disorder Uterine haemorrhage Uterine leiomyoma  
 Uterine neoplasm Uterovaginal prolapse VIIth nerve paralysis  
 Vaginal discharge Vaginal haemorrhage Vaginal infection  
 Vaginal inflammation Varicose vein Vascular purpura

Vasculitis Vasoconstriction Vasodilation procedure Vasospasm  
 Vein disorder Venous thrombosis Ventricular arrhythmia  
 Ventricular extrasystoles Ventricular failure Ventricular  
 fibrillation Ventricular hypertrophy Ventricular  
 tachycardia Vertigo Vestibular ataxia Vestibular disorder Viral  
 diarrhoea Viral infection Vision blurred Visual acuity reduced  
 Visual impairment Vitamin B12 deficiency Vitreous detachment  
 Vitreous floaters Vocal cord paralysis Vomiting  
 Vulvovaginal candidiasis Vulvovaginal dryness  
 Vulvovaginal mycotic infection Vulvovaginal pruritus  
 Vulvovaginitis Water intoxication Weight decreased  
 Weight fluctuation Weight increased Wheezing White blood  
 cell count decreased White blood cell count increased White blood  
 cells urine positive Withdrawal bleed Withdrawal syndrome Wound  
 infection Xerophthalmia Xerosis Yawning  
 \*\*\*\*\*  
 \*\*\*\*\*

Low affinity immunoglobulin gamma Fc region receptor II-a - Group:  
 Receptor

Treated with:

cetuximab: approved biotech (0 associated side effects) For  
 treatment of EGFR-expressing metastatic colorectal cancer in  
 patients who are refractory to other irinotecan-based chemotherapy  
 regimens. Cetuximab is also indicated for treatment of squamous cell  
 carcinoma of the head and neck in conjunction with radiation  
 therapy.

etanercept: approved biotech (0 associated side effects) For  
 treatment of severe active rheumatoid arthritis in adults, severe  
 juvenile idiopathic arthritis, ankylosing spondylitis, and severe  
 plaque psoriasis.

intravenous immunoglobulin: approved biotech (0 associated  
 side effects) IVIg is used in the treatment of  
 immunodeficiencies, as well as autoimmune and inflammatory  
 disorders. These indications includes idiopathic thrombocytopenic  
 purpura, Kawasaki disease, hypogammaglobulinemia, B cell chronic  
 lymphocytic leukemia, bone marrow transplant complications,  
 Guillain-Barré syndrome, chronic inflammatory demyelinating  
 polyneuropathy (CIDP), multiple sclerosis, rheumatoid arthritis,  
 myasthenia gravis, Wiskott-Aldrich syndrome and inflammatory  
 skin diseases.

adalimumab: approved biotech (0 associated side effects) For  
 treatment of rheumatoid arthritis, psoriatic arthritis, ankylosing  
 spondylitis, and Crohn's disease.

abciximab: approved biotech (0 associated side effects)  
 gemtuzumab ozogamicin: approved biotech (0 associated side  
 effects) For treatment of CD33-positive acute myeloid leukemia in  
 patients 60 and over who are not candidates for other chemotherapy.

trastuzumab: approved biotech (0 associated side effects)  
 For treatment of early stage HER2-positive breast cancer, or  
 metastatic breast cancer that substantially overexpress HER2.

rituximab: approved biotech (0 associated side effects) For  
 treatment of CD20-positive non-Hodgkins lymphoma, chronic  
 lymphocytic leukemia, and rheumatoid arthritis.

basiliximab: approved biotech (0 associated side effects)  
 For prophylactic treatment of kidney transplant rejection

muromonab: approved biotech (0 associated side effects) For treatment of organ transplant recipients, prevention of organ rejection

ibritumomab: approved biotech (0 associated side effects) For treatment of non-Hodgkin's lymphoma

tositumomab: approved biotech (0 associated side effects) For treatment of non-Hodgkin's lymphoma (CD20 positive, follicular)

alemtuzumab: approved biotech (0 associated side effects) Alemtuzumab (Campath) is a monoclonal antibody therapy used for treatment of B-cell chronic lymphocytic leukemia.

alefacept: approved biotech (0 associated side effects) As an immunosuppressive drug, Alefacept can be used for treatment of moderate to severe chronic plaque psoriasis

efalizumab: approved biotech (0 associated side effects) For the treatment of adult patients with moderate to severe chronic plaque psoriasis, who are candidates for phototherapy or systemic therapy.

natalizumab: approved biotech (0 associated side effects) For treatment of multiple sclerosis.

palivizumab: approved biotech (0 associated side effects) For prophylaxis of respiratory diseases caused by respiratory syncytial virus.

daclizumab: approved biotech (0 associated side effects) Zenapax is a humanized monoclonal antibody used for prevention of renal transplant rejection

bevacizumab: approved biotech (0 associated side effects) As part of combination therapy for metastatic colorectal cancer and HER2-negative metastatic breast cancer.

known side effects mediated through drugs targeting this protein:

\*\*\*\*\*  
\*\*\*\*\*

D1 dopamine receptor-interacting protein calcyon - Group: Other  
Treated with:

clozapine: approved small molecule (228 associated side effects) For use in patients with treatment-resistant schizophrenia.

apomorphine: approved small molecule (45 associated side effects) For the acute, intermittent treatment of hypomobility, off episodes (end-of-dose wearing off and unpredictable on/off episodes) associated with advanced Parkinson's disease.

trifluoperazine: approved small molecule (111 associated side effects) For the treatment of anxiety disorders, depressive symptoms secondary to anxiety and agitation.

297 known side effects mediated through drugs targeting this protein:

Abdominal discomfort Abdominal distension Abnormal faeces Acute coronary syndrome Agitation Agranulocytosis Akathisia Akinesia Amenorrhoea Amnesia Anaemia Anaphylactic shock Anaphylactoid reaction Angina pectoris Angioedema Angle closure glaucoma Anxiety Aphasia Aplastic anaemia Arrhythmia Arthralgia Asphyxia Aspiration Asthenia Asthma

Ataxia      Back pain    Blood disorder    Blood triglycerides  
 increased    Blood uric acid increased    Body temperature decreased  
 Body temperature increased    Bradycardia    Brain oedema  
 Breast feeding    Breast pain    Bronchitis    Cardiac arrest  
 Cardiac failure    Cardiac failure congestive    Cardiac  
 fibrillation      Cardiomyopathy    Cataplexy    Catatonia    Chest pain  
 Chills      Cholestasis    Cogwheel rigidity    Coma    Confusional state  
 Constipation      Convulsion    Corneal deposits    Cough    Cyanosis  
 Cytolytic hepatitis    Death    Decreased appetite    Deep vein  
 thrombosis    Dehydration    Delirium    Delusion    Dementia    Dependence  
 Dermatitis    Dermatitis exfoliative    Diabetes mellitus    Diabetic  
 hyperosmolar coma    Diarrhoea    Discomfort    Disturbance in sexual  
 arousal      Dizziness    Drooling    Drug abuse    Drug dependence    Dry  
 mouth    Dry throat    Dysarthria    Dysgeusia    Dyskinesia    Dysmenorrhoea  
 Dyspepsia    Dysphagia    Dysphemia    Dyspnoea    Dystonia    Ear  
 disorder    Ecchymosis    Eczema    Effusion    Ejaculation disorder  
 Electrocardiogram change    Electroencephalogram abnormal  
 Embolism    Eosinophilia    Epistaxis    Erectile dysfunction  
 Eructation    Erythema    Erythema multiforme    Extrapryamidal  
 disorder    Eyelid disorder    Faecalith    Faecaloma    Fatigue  
 Feeling abnormal    Feeling jittery    Flushing    Gait disturbance  
 Galactorrhoea    Gastric disorder    Gastric ulcer  
 Gastroenteritis    Glaucoma    Glucose tolerance impaired  
 Glycosuria    Grand mal convulsion    Gynaecomastia  
 Haematemesis      Haemoglobin increased    Haemolytic anaemia  
 Haemorrhage    Hallucination    Headache    Heart disease  
 congenital    Hepatitis    Hepatocellular injury    Hot flush  
 Hypercholesterolaemia    Hyperglycaemia    Hyperhidrosis  
 Hyperkinesia    Hyperpyrexia    Hyperreflexia  
 Hypersensitivity    Hypersexuality    Hypertension  
 Hypertriglyceridaemia    Hyperuricaemia    Hyperventilation  
 Hypoaesthesia    Hypoglycaemia    Hypokinesia    Hyponatraemia  
 Hypotension    Hypothermia    Ileus paralytic    Ill-defined disorder  
 Incontinence      Increased appetite    Infarction    Infection  
 Insomnia    Intestinal obstruction    Irritability    Jaundice  
 Keratopathy    Ketoacidosis    Laryngeal oedema    Laryngitis  
 Lethargy    Leukocytosis    Leukopenia    Libido increased    Liver  
 injury      Loss of consciousness    Lower respiratory tract infection  
 Maculopathy    Malaise    Megacolon    Menopausal symptoms  
 Menstruation irregular    Mental disorder    Micturition urgency  
 Miosis      Mitral valve incompetence    Muscle rigidity  
 Muscle spasms      Muscle twitching    Muscular weakness  
 Musculoskeletal discomfort    Myalgia    Myasthenic syndrome  
 Mydriasis    Myocardial infarction    Myocarditis    Myoclonus    Nasal  
 congestion    Nasopharyngitis    Nausea    Nephritis    Nervousness  
 Neuroleptic malignant syndrome    Neutropenia    Nightmare  
 Nystagmus    Obstruction    Ocular hyperaemia    Oculogyric crisis  
 Oedema      Oedema peripheral    Opisthotonus    Oropharyngeal  
 discomfort    Oropharyngeal pain    Orthostatic hypotension  
 Osteoarthritis    Pain    Pain in extremity    Pallor  
 Palpitations      Pancreatitis    Pancreatitis acute  
 Pancytopenia      Paraesthesia    Paranoia    Pathological  
 gambling    Pericardial effusion    Pericarditis    Periorbital  
 oedema      Petechiae    Petit mal epilepsy    Phaeochromocytoma  
 Phlebitis    Photosensitivity reaction    Pigmentation disorder



Pleural disorder Pleural effusion Pneumonia Pollakiuria  
 Polydipsia Pregnancy test false positive Pregnancy test  
 positive Priapism Protrusion tongue Pruritus Psychotic  
 disorder Pulmonary embolism Purpura Rash Rectal  
 haemorrhage Red blood cell sedimentation rate increased Respiratory  
 arrest Respiratory tract infection Retinal disorder Retinitis  
 pigmentosa Rhabdomyolysis Rhinorrhoea Salivary gland enlargement  
 Salivary hypersecretion Sedation Sensory loss  
 Sepsis Shock Skin disorder Sneezing Somnolence  
 Status epilepticus Sudden death Suicidal ideation  
 Swelling Syncope Systemic lupus erythematosus Tachycardia  
 Tardive dyskinesia Tenderness Throat tightness  
 Thrombocytopenia Thrombocytopenic purpura Thrombocytosis  
 Thrombophlebitis Thrombosis Tic Tooth impacted Torsade de  
 pointes Toxic epidermal necrolysis Tremor  
 Tubulointerstitial nephritis Ulcer Urinary retention Urinary  
 tract infection Urticaria Vascular purpura Vasculitis Venous  
 thrombosis Ventricular extrasystoles Ventricular fibrillation  
 Ventricular tachycardia Vertigo Vision blurred  
 Visual impairment Vomiting Vulvovaginal pruritus Weight  
 decreased Weight increased Wheezing White blood cell count  
 decreased Yawning

\*\*\*\*\*  
 \*\*\*\*\*

Receptor tyrosine-protein kinase erbB-2 - Group: Enzyme

Treated with:

trastuzumab: approved biotech (0 associated side effects)

For treatment of early stage HER2-positive breast cancer, or metastatic breast cancer that substantially overexpress HER2.

lapatinib: approved small molecule (0 associated side effects)

Indicated in combination with capecitabine for the treatment of patients with advanced or metastatic breast cancer whose tumors overexpress the human epidermal receptor type 2 (HER2) protein and who have received prior therapy including an anthracycline, a taxane, and trastuzuma.

known side effects mediated through drugs targeting this protein:

\*\*\*\*\*  
 \*\*\*\*\*

Estrogen receptor - Group: Receptor

Treated with:

diethylstilbestrol: approved small molecule (0 associated side effects) Used in the treatment of prostate cancer.

Previously used in the prevention of miscarriage or premature delivery in pregnant women prone to miscarriage or premature delivery.

chlorotrianisene: approved small molecule (0 associated side effects) Used to treat symptoms of menopause, deficiencies in ovary function (including underdevelopment of female sexual characteristics and some types of infertility), and in rare cases, prostate cancer. Chlorotrianisene may also be used to prevent breast engorgement following childbirth.

conjugated estrogens: approved small molecule (219 associated side effects) For the treatment of moderate to severe vasomotor

symptoms associated with the menopause, atrophic vaginitis, osteoporosis, hypoestrogenism due to hypogonadism, castration, primary ovarian failure, breast cancer (for palliation only), and Advanced androgen-dependent carcinoma of the prostate (for palliation only)

etonogestrel: approved small molecule (0 associated side effects) For use as a female contraceptive (depot).

desogestrel: approved small molecule (0 associated side effects) For the prevention of pregnancy in women who elect to use this product as a method of contraception.

levonorgestrel: approved small molecule (187 associated side effects) For the treatment of menopausal and postmenopausal disorders and alone or in combination with other hormones as an oral contraceptive.

progesterone: approved small molecule (256 associated side effects) For progesterone supplementation or replacement as part of an Assisted Reproductive Technology (ART) treatment for infertile women with progesterone deficiency and for the treatment of secondary amenorrhea. Also used for the reduction of the incidence of endometrial hyperplasia and the attendant risk of endometrial carcinoma in postmenopausal women receiving estrogen replacement therapy, as well as treatment of abnormal uterine bleeding due to hormonal imbalance in the absence of organic pathology such as fibroids or uterine cancer.

raloxifene: approved small molecule (83 associated side effects)

For the prevention and treatment of osteoporosis in postmenopausal women, as well as prevention and treatment of corticosteroid-induced bone loss. Also for the reduction in the incidence of invasive breast cancer in postmenopausal women with osteoporosis or have a high risk for developing breast cancer.

toremifene: approved small molecule (58 associated side effects)

For the treatment of metastatic breast cancer in postmenopausal women with estrogen receptor-positive or receptor-unknown tumors. Toremifene is currently under investigation as a preventative agent for prostate cancer in men with high-grade prostatic intraepithelial neoplasia and no evidence of prostate cancer.

medroxyprogesterone: approved small molecule (373 associated side effects) Used as a contraceptive and to treat secondary amenorrhea, abnormal uterine bleeding, pain associated with endometriosis, endometrial and renal cell carcinomas, paraphilia in males, GnRH-dependent forms of precocious puberty, as well as to prevent endometrial changes associated with estrogens.

estrone: approved small molecule (0 associated side effects)

For management of perimenopausal and postmenopausal symptoms.

tamoxifen: approved small molecule (181 associated side effects) For the treatment of breast cancer.

estradiol: approved small molecule (315 associated side effects) For the treatment of urogenital symptoms associated with post-menopausal atrophy of the vagina (such as dryness, burning, pruritus and dyspareunia) and/or the lower urinary tract (urinary urgency and dysuria).

ethynodiol diacetate: approved small molecule (0 associated side effects) For the prevention of pregnancy in women who elect to use this product as a method of contraception.

clomifene: approved small molecule (0 associated side effects)  
Used mainly in female infertility due to anovulation (e.g. due to polycystic ovary syndrome) to induce ovulation.

dienestrol: approved small molecule (0 associated side effects)  
For use in the treatment of atrophic vaginitis and kraurosis vulvae.

fulvestrant: approved small molecule (0 associated side effects)  
For the treatment of hormone receptor positive metastatic breast cancer in postmenopausal women with disease progression following anti-estrogen therapy.

norgestimate: approved small molecule (0 associated side effects)  
For the prevention of pregnancy

ethinyl estradiol: approved small molecule (0 associated side effects)  
For treatment of moderate to severe vasomotor symptoms associated with the menopause, female hypogonadism, prostatic carcinoma-palliative therapy of advanced disease, breast cancer, as an oral contraceptive, and as emergency contraceptive.

melatonin: approved, nutraceutical small molecule (0 associated side effects)  
Used orally for jet lag, insomnia, shift-work disorder, circadian rhythm disorders in the blind (evidence for efficacy), and benzodiazepine and nicotine withdrawal. Evidence indicates that melatonin is likely effective for treating circadian rhythm sleep disorders in blind children and adults. It has received FDA orphan drug status as an oral medication for this use. A number of studies have shown that melatonin may be effective for treating sleep-wake cycle disturbances in children and adolescents with mental retardation, autism, and other central nervous system disorders. It appears to decrease the time to fall asleep in children with developmental disabilities, such as cerebral palsy, autism, and mental retardation. It may also improve secondary insomnia associated with various sleep-wake cycle disturbances. Other possible uses for which there is some evidence for include: benzodiazepine withdrawal, cluster headache, delayed sleep phase syndrome (DSPS), primary insomnia, jet lag, nicotine withdrawal, preoperative anxiety and sedation, prostate cancer, solid tumors (when combined with IL-2 therapy in certain cancers), sunburn prevention (topical use), tardive dyskinesia, thrombocytopenia associated with cancer, chemotherapy and other disorders.

trilostane: approved, withdrawn small molecule (0 associated side effects)  
Used in the treatment of Cushing's syndrome. It is normally used in short-term treatment until permanent therapy is possible.

naloxone: approved small molecule (54 associated side effects)  
For the complete or partial reversal of narcotic depression, including respiratory depression, induced by opioids including natural and synthetic narcotics, propoxyphene, methadone and the narcotic-antagonist analgesics: nalbuphine, pentazocine and butorphanol.

fluoxymesterone: illicit, approved small molecule (35 associated side effects)  
In males, used as replacement therapy in conditions associated with symptoms of deficiency or absence of endogenous testosterone. In females, for palliation of androgenresponsive recurrent mammary cancer in women who are more than one year but less than five years postmenopausal.

estramustine: approved small molecule (71 associated side effects) For the palliative treatment of patients with metastatic and/or progressive carcinoma of the prostate

mestranol: approved small molecule (0 associated side effects)  
Mestranol was used as one of the first oral contraceptives.

danazol: approved small molecule (89 associated side effects)  
For the treatment of endometriosis and fibrocystic breast disease (in patients unresponsive to simple measures). Also used for the prophylactic treatment of all types of hereditary angioedema in males and females.

allylestrenol: approved small molecule (0 associated side effects)  
Allylestrenol was designed to be used for miscarriage prevention, prevention of premature labour and has been investigated for possible use in men for treatment for benign prostatic hyperplasia.

genistein: experimental small molecule (0 associated side effects)

compound 19: experimental small molecule (0 associated side effects)

compound 18: experimental small molecule (0 associated side effects)

compound 4-d: experimental small molecule (0 associated side effects)

1-[4-(octahydro-pyrido[1,2-a]pyrazin-2-yl)-phenyl]-2-phenyl-1,2,3,4-tetrahydro-isoquinolin-6-ol: experimental small molecule (0 associated side effects)

2-phenyl-1-[4-(2-piperidin-1-yl-ethoxy)-phenyl]-1,2,3,4-tetrahydro-isoquinolin-6-ol: experimental small molecule (0 associated side effects)

estriol: approved small molecule (0 associated side effects)  
Used as a test to determine the general health of an unborn fetus.

estropipate: approved small molecule (0 associated side effects)  
Estropipate is used for the treatment of moderate to severe vasomotor symptoms associated with the menopause, and moderate to severe symptoms of vulval and vaginal atrophy associated with the menopause. It is also used to treat hypoestrogenism due to hypogonadism, castration or primary ovarian failure, and prevent postmenopausal osteoporosis.

quinestrol: approved small molecule (0 associated side effects)  
Used in hormone replacement therapy, treating symptoms of menopause such as hot flashes. Also used to treat breast and prostate cancer.

norelgestromin: approved small molecule (0 associated side effects)  
Norelgestromin is used for contraception and menopausal hormonal therapy. Norelgestromin may potentially be used in breast cancer treatment due to its inhibitory effect on estrone sulfatase. They convert sulfated steroid precursors to estrogen during pregnancy.

17-methyl-17-alpha-dihydroequilenin: experimental small molecule (0 associated side effects)

4-(2-amino-1-methyl-1h-imidazo[4,5-b]pyridin-6-yl)phenol: experimental small molecule (0 associated side effects)

[5-hydroxy-2-(4-hydroxyphenyl)-1-benzofuran-7-yl]acetonitrile: experimental small molecule (0 associated side effects)

4-[(1s,2s,5s)-5-(hydroxymethyl)-8-methyl-3-oxabicyclo[3.3.1]non-7-en-2-yl]phenol: experimental small molecule (0 associated side effects)

4-[(1s,2s,5s,9r)-5-(hydroxymethyl)-8,9-dimethyl-3-oxabicyclo[3.3.1]non-7-en-2-yl]phenol: experimental small molecule (0 associated side effects)

4-[(1s,2s,5s)-5-(hydroxymethyl)-6,8,9-trimethyl-3-oxabicyclo[3.3.1]non-7-en-2-yl]phenol: experimental small molecule (0 associated side effects)

(2r,3r,4s)-3-(4-hydroxyphenyl)-4-methyl-2-[4-(2-pyrrolidin-1-ylethoxy)phenyl]chroman-6-ol: experimental small molecule (0 associated side effects)

(3as,4r,9br)-2,2-difluoro-4-(4-hydroxyphenyl)-1,2,3,3a,4,9b-hexahydrocyclopenta[c]chromen-8-ol: experimental small molecule (0 associated side effects)

(9alpha,13beta,17beta)-2-[(1z)-but-1-en-1-yl]estra-1,3,5(10)-triene-3,17-diol: experimental small molecule (0 associated side effects)

(9beta,11alpha,13alpha,14beta,17alpha)-11-(methoxymethyl)estra-1(10),2,4-triene-3,17-diol: experimental small molecule (0 associated side effects)

3-chloro-2-(4-hydroxyphenyl)-2h-indazol-5-ol: experimental small molecule (0 associated side effects)

3-ethyl-2-(4-hydroxyphenyl)-2h-indazol-5-ol: experimental small molecule (0 associated side effects)

dimethyl (1r,4s)-5,6-bis(4-hydroxyphenyl)-7-oxabicyclo[2.2.1]hept-2,5-diene-2,3-dicarboxylate: experimental small molecule (0 associated side effects)

(3as,4r,9br)-4-(4-hydroxyphenyl)-1,2,3,3a,4,9b-hexahydrocyclopenta[c]chromen-8-ol: experimental small molecule (0 associated side effects)

n-[(1r)-3-(4-hydroxyphenyl)-1-methylpropyl]-2-(2-phenyl-1h-indol-3-yl)acetamide: experimental small molecule (0 associated side effects)

(3as,4r,9br)-4-(4-hydroxyphenyl)-6-(methoxymethyl)-1,2,3,3a,4,9b-hexahydrocyclopenta[c]chromen-8-ol: experimental small molecule (0 associated side effects)

4-[1-allyl-7-(trifluoromethyl)-1h-indazol-3-yl]benzene-1,3-diol: experimental small molecule (0 associated side effects)

4-(6-hydroxy-1h-indazol-3-yl)benzene-1,3-diol: experimental small molecule (0 associated side effects)

diethyl (1r,2s,3r,4s)-5,6-bis(4-hydroxyphenyl)-7-oxabicyclo[2.2.1]hept-5-ene-2,3-dicarboxylate: experimental small molecule (0 associated side effects)

2-amino-1-methyl-6-phenylimidazo[4,5-b]pyridine: experimental small molecule (0 associated side effects)

4-[(1s,2r,5s)-4,4,8-trimethyl-3-oxabicyclo[3.3.1]non-7-en-2-yl]phenol: experimental small molecule (0 associated side effects)

(3as,4r,9br)-4-(4-hydroxyphenyl)-1,2,3,3a,4,9b-hexahydrocyclopenta[c]chromen-9-ol: experimental small molecule (0 associated side effects)

raloxifene core: experimental small molecule (0 associated side effects)

733 known side effects mediated through drugs targeting this protein:

5q minus syndrome  
Abdominal discomfort    Abdominal distension  
Abdominal mass    Abdominal pain    Abdominal pain lower  
Abdominal pain upper    Abortion missed    Abortion spontaneous  
Abscess    Abscess sterile    Acne    Acute coronary syndrome  
Acute leukaemia    Acute psychosis    Acute respiratory distress  
syndrome    Acute tonsillitis  
Adenocarcinoma    Adenoma benign  
Adrenal disorder    Affect lability    Aggression    Agitation  
Alanine aminotransferase increased  
Albright's disease  
Alcohol poisoning  
Alopecia    Amenorrhoea    Amnesia    Anaemia  
Anal pruritus    Analgesic therapy  
Anaphylactic shock  
Anaphylactoid reaction    Androgenetic alopecia    Anencephaly  
Angina pectoris    Angioedema    Angiopathy    Anorectal discomfort  
Anorectal disorder    Anorgasmia    Anosmia    Anovulatory cycle  
Antepartum haemorrhage    Anxiety    Aortic dissection  
Appendicitis    Application site reaction    Arrhythmia  
Arterial thrombosis    Arthralgia    Arthritis    Arthropathy  
Artificial menopause    Aspartate aminotransferase increased  
Assisted fertilisation    Asthenia    Asthma    Ataxia  
Atrophy    Attention deficit/hyperactivity disorder  
Autonomic neuropathy    Azoospermia  
Back pain    Bacterial  
infection    Balance disorder    Basal cell carcinoma    Becker's muscular  
dystrophy    Benign breast neoplasm    Benign hydatidiform mole  
Benign intracranial hypertension    Benign neoplasm    Benign  
vaginal neoplasm    Bladder cancer    Bladder disorder    Bladder pain  
Blepharitis    Blighted ovum    Blindness    Blister    Blood  
alkaline phosphatase increased    Blood bilirubin increased    Blood  
cholesterol increased    Blood creatinine increased    Blood disorder  
Blood glucose decreased    Blood glucose increased    Blood  
insulin increased  
Blood oestrogen decreased    Blood pressure  
increased    Blood testosterone decreased  
Blood triglycerides  
increased    Blood urine    Blood urine present    Body temperature  
increased    Bone cancer metastatic    Bone disorder    Bone pain  
Bradycardia  
Breast cancer    Breast cancer in situ    Breast  
cancer male  
Breast cancer stage IV    Breast discharge    Breast discomfort  
Breast disorder    Breast disorder male    Breast engorgement  
Breast enlargement    Breast feeding    Breast malformation  
Breast mass    Breast neoplasm    Breast pain    Breast swelling  
Breast tenderness  
Bromosulphthalein test abnormal    Bronchitis  
Bronchospasm    Cachexia    Candidiasis    Carbohydrate tolerance  
decreased    Cardiac arrest    Cardiac disorder    Cardiac failure  
Cardiac failure congestive    Cardiac fibrillation    Cardiac  
septal defect    Cardiovascular disorder    Carpal tunnel syndrome  
Cataract    Cerebral artery thrombosis    Cerebral haemorrhage  
Cerebral infarction    Cerebral ischaemia    Cerebral  
thrombosis    Cerebral venous thrombosis    Cerebrovascular accident  
Cerebrovascular disorder    Cervical discharge    Cervical  
dysplasia    Cervicitis    Cervix carcinoma    Cervix disorder    Chapped  
lips    Chest pain    Chills    Chloasma    Choking    Cholangitis  
Cholecystitis    Cholelithiasis    Cholestasis    Chorea    Cleft  
lip    Cleft palate    Cold sweat    Colitis ischaemic  
Colorectal cancer  
Coma    Coma hepatic    Confusional state  
Congenital anomaly  
Congenital diaphragmatic hernia    Congenital megacolon  
Conjunctivitis    Connective tissue disorder    Constipation

Contact lens intolerance      Convulsion      Coordination abnormal  
 Corneal opacity      Coronary artery disease      Coronary artery  
 thrombosis      Cough      Crying      Cushingoid      Cutaneous lupus  
 erythematosus      Cystitis      Cystitis noninfective      Death      Decreased  
 appetite      Deep vein thrombosis      Deformity      Dementia      Dependence  
 Depersonalisation      Depressed level of consciousness      Depressed  
 mood      Depression      Dermatitis      Dermatitis bullous      Dermatitis  
 contact      Developmental delay      Diabetes mellitus      Diaphragmatic  
 hernia      Diarrhoea      Diplopia      Discomfort      Disease progression  
 Disorientation      Disturbance in attention      Disturbance in  
 sexual arousal      Diverticulitis      Dizziness      Drug dependence      Drug  
 interaction      Dry eye      Dry mouth      Dry skin      Dysarthria      Dysgeusia  
 Dysmenorrhoea      Dyspareunia      Dyspepsia      Dysphagia      Dysphemia  
 Dysphonia      Dysplasia      Dyspnoea      Dysuria      Ear disorder  
 Ear infection      Ear malformation      Ear pain      Eating disorder  
 Ecchymosis      Ectopic pregnancy      Ectropion of cervix      Eczema  
 Electrocardiogram QT prolonged      Electrolyte imbalance  
 Embolism      Embolism venous      Emotional disorder      Emotional  
 distress      Encephalopathy      Endocrine disorder      Endometrial  
 cancer      Endometrial disorder      Endometrial hypertrophy  
 Endometriosis      Endometritis      Enlarged clitoris  
 Eosinophilia      Epilepsy      Epistaxis      Erectile dysfunction  
 Eructation      Erythema      Erythema multiforme      Erythema nodosum  
 Eye disorder      Eye infection      Eye pain      Eyelid oedema  
 Eyelid ptosis      Face oedema      Family stress      Fasting  
 Fatigue      Febrile neutropenia      Feeling abnormal      Feeling  
 drunk      Fibroadenoma of breast      Fibrocystic breast disease      Fistula  
 Flatulence      Fluid retention      Flushing      Foetal disorder  
 Foetor hepaticus      Folliculitis      Fungal infection      Gait  
 disturbance      Galactorrhoea      Gallbladder disorder      Gastric disorder  
 Gastritis      Gastroenteritis      Gastrointestinal disorder  
 Gastrointestinal haemorrhage      Gastrointestinal pain  
 Gastrointestinal tract irritation      Gastrooesophageal reflux  
 disease      Generalised oedema      Genital candidiasis      Genital  
 discharge      Genital disorder female      Genital infection      Genital  
 ulceration      Gingival bleeding      Glaucoma      Glucose tolerance decreased  
 Glucose tolerance impaired      Goitre      Grand mal convulsion  
 Growth retardation      Gynaecomastia      Haemangioma      Haematoma  
 Haematuria      Haemoglobin decreased      Haemolytic anaemia  
 Haemoptysis      Haemorrhage      Haemorrhagic disorder      Haemorrhoids  
 Hallucination      Headache      Heart disease congenital      Heart  
 rate irregular      Hemiparesis      Hepatic adenoma      Hepatic cyst  
 Hepatic enzyme increased      Hepatic failure      Hepatic function  
 abnormal      Hepatic necrosis      Hepatic neoplasm      Hepatic steatosis  
 Hepatitis cholestatic      Hepatobiliary disease      Hepatocellular  
 injury      Hepatomegaly      Hereditary angioedema      Hereditary  
 disorder      Hernia      Herpes simplex      Herpes virus infection  
 Herpes zoster      High density lipoprotein decreased      Hirsutism  
 Hormone level abnormal      Hot flush      Hydrocephalus      Hydrops  
 foetalis      Hyperaemia      Hyperaesthesia      Hypercalcaemia  
 Hypercholesterolaemia      Hyperglycaemia      Hyperhidrosis  
 Hyperinsulinism      Hyperkinesia      Hyperlipidaemia  
 Hypernatraemia      Hypersensitivity      Hypertension  
 Hyperthyroidism      Hypertonia      Hypertrichosis  
 Hypertriglyceridaemia      Hypertrophy      Hyperventilation

Hypoaesthesia Hypocalcaemia Hypochromic anaemia  
 Hypoglycaemia Hypokalaemia Hypomenorrhoea  
 Hypopituitarism Hypospadias Hypotension Hypothyroidism  
 Hypoxia IIIrd nerve paralysis Ichthyosis acquired Ill-  
 defined disorder Immune system disorder Incontinence Increased  
 appetite Increased tendency to bruise Infarction Infection  
 Infestation Influenza Influenza like illness Injection site  
 atrophy Injection site pain Injection site reaction  
 Insomnia Interstitial lung disease Intestinal infarction  
 Intestinal obstruction Intracranial pressure increased  
 Irritability Ischaemia Ischaemic neuropathy Ischaemic  
 stroke Jaundice Jaundice cholestatic Jaundice neonatal Joint  
 swelling Keratopathy Laboratory test abnormal Lacrimal disorder  
 Lacrimation increased Laryngeal oedema Laryngitis  
 Laryngospasm Leiomyoma Lens disorder Lethargy  
 Leukaemia Leukocytosis Leukopenia Libido decreased  
 Libido increased Limb deformity Liver disorder Liver  
 function test abnormal Loss of consciousness Loss of libido  
 Lymphadenopathy Lymphatic disorder Lymphoedema Macular  
 degeneration Macular oedema Malaise Malignant melanoma  
 Mammogram abnormal Mantle cell lymphoma Mass Mastitis  
 Mediastinal disorder Medical device complication Megacolon  
 Melanocytic naevus Memory impairment Meningioma benign  
 Menometrorrhagia Menopausal symptoms Menopause Menorrhagia  
 Menstrual disorder Menstruation delayed Menstruation  
 irregular Mental disability Mental disorder Metastasis Metastatic  
 neoplasm Metrorrhagia Microcephaly Microsomia Migraine  
 Mood swings Mouth ulceration Muscle contractions involuntary  
 Muscle rigidity Muscle spasms Muscle twitching Muscular  
 weakness Musculoskeletal discomfort Musculoskeletal disorder  
 Musculoskeletal pain Musculoskeletal stiffness Myalgia  
 Myocardial infarction Myocardial ischaemia Myoclonus  
 Myopathy Nail disorder Nasal congestion Nasopharyngitis  
 Nausea Neck pain Necrosis Neoplasm Neoplasm  
 malignant Nephritis Nephrolithiasis Nephrotic syndrome  
 Nervous system disorder Nervousness Neuralgia Neuritis  
 Neurofibroma Neuropathy peripheral Neutropenia Night  
 sweats Nipple pain Nocturia Nodule Nuchal rigidity  
 Obstruction Oedema Oedema genital Oedema peripheral  
 Oesophageal atresia Oesophageal disorder Oestrogen  
 deficiency Oestrogenic effect Oligomenorrhoea Optic ischaemic  
 neuropathy Optic nerve disorder Optic neuritis Oropharyngeal  
 blistering Oropharyngeal discomfort Oropharyngeal pain  
 Orthostatic hypotension Osteoarthritis Osteonecrosis  
 Osteoporosis Osteoporotic fracture Otitis media  
 Ovarian cancer Ovarian cyst Ovarian disorder Ovarian  
 failure Ovarian hyperstimulation syndrome Pain in extremity  
 Palpitations Pancreatic disorder Pancreatitis  
 Pancreatitis acute Pancytopenia Papilloedema  
 Papilloma Paraesthesia Paralysis Paranoia Paresis  
 Patent ductus arteriosus Pathological fracture Peliosis  
 hepatis Pelvic pain Pemphigoid Pericarditis Perineal pain  
 Personality disorder Pharyngitis Phlebitis Phlebitis  
 superficial Photosensitivity reaction Pigmentation disorder  
 Piloerection Platelet count decreased Pleural disorder



Pleural infection Pneumonia Pollakiuria Polycythaemia  
Polydactyly Polydipsia Polyhydramnios Polymenorrhoea Polyp  
Polyuria Porphyria Porphyria acute Porphyria non-acute  
Postmenopausal haemorrhage Precocious puberty Premature  
baby Premature menopause Premenstrual syndrome Priapism  
Protein urine present Proteinuria Prurigo Pruritus  
generalised Pruritus genital Psychotic disorder Puberty  
Pulmonary embolism Pulmonary function test decreased  
Pulmonary oedema Purpura Rash erythematous Rash generalised  
Rectal haemorrhage Renal cancer Renal infarct Renal  
neoplasm Reproductive tract disorder Respiratory depression  
Respiratory disorder Respiratory distress Respiratory tract  
infection Retinal disorder Retinal vein occlusion Retinal vein  
thrombosis Rhinitis Rhinorrhoea Salivary gland enlargement  
Salpingitis Sarcoma uterus Sciatica Scleroderma Seborrhoeic  
dermatitis Sedation Sensory loss Sepsis Shock Sickle cell  
anaemia with crisis Single umbilical artery Sinus congestion  
Sinus headache Sinusitis Skin discolouration Skin  
disorder Skin exfoliation Skin haemorrhage Skin hypertrophy Skin  
irritation Skin odour abnormal Skin papilloma Skin tightness  
Skin ulcer Skull malformation Sleep disorder Smear  
cervix abnormal Sneezing Social avoidant behaviour Soft tissue  
disorder Somnolence Speech disorder Spina bifida Splenic  
infarction Squamous cell carcinoma Sticky skin Stillbirth  
Stomatitis Stupor Subcutaneous nodule Sudden infant  
death syndrome Suicidal ideation Supraventricular tachycardia  
Swelling Swollen tongue Syncope Systemic lupus  
erythematosus Tachycardia Talipes Tearfulness Tenderness  
Tendon disorder Tendonitis Tension Tension headache  
Thirst Throat irritation Throat tightness Thrombocytopenia  
Thrombocytopenic purpura Thrombocytosis Thrombophlebitis  
superficial Thrombosis Thrombotic thrombocytopenic purpura  
Thyroiditis Tinnitus Tonsillitis Tooth abscess Tooth  
disorder Toothache Toxic epidermal necrolysis Toxic shock  
syndrome Tracheo-oesophageal fistula Transaminases increased  
Transient ischaemic attack Tremor Trisomy 21  
Tubulointerstitial nephritis Tumour flare Tumour pain Ulcer  
Upper respiratory tract infection Urethral disorder Urinary  
incontinence Urinary retention Urinary tract disorder Urinary  
tract infection Urine output increased Urticaria Uterine cancer  
Uterine cervical erosion Uterine cyst Uterine disorder  
Uterine enlargement Uterine haemorrhage Uterine leiomyoma  
Uterine pain Uterine perforation Uterine polyp  
Uterine spasm Uterovaginal prolapse VIIIth nerve paralysis  
Vaginal cyst Vaginal discharge Vaginal disorder Vaginal  
dysplasia Vaginal haemorrhage Vaginal infection Vaginal  
inflammation Vaginal neoplasm Vaginal ulceration Vaginismus  
Vaginitis bacterial Varicose vein Vascular purpura  
Vasculitis Vasodilation procedure Vein pain Venous occlusion  
Venous thrombosis Ventricular fibrillation Ventricular  
septal defect Ventricular tachycardia Vertigo Viral  
infection Virilism Vision blurred Visual acuity reduced  
Visual impairment Vomiting Vulval abscess Vulval disorder  
Vulvovaginal candidiasis Vulvovaginal discomfort  
Vulvovaginal dryness Vulvovaginal mycotic infection

Vulvovaginal pain Vulvovaginal pruritus Vulvovaginitis  
Weight decreased Weight increased Wheezing Withdrawal bleed  
Withdrawal syndrome Xerophthalmia Yawning

\*\*\*\*\*  
\*\*\*\*\*

Cation-independent mannose-6-phosphate receptor - Group: Receptor  
Treated with:

mecasermin: approved biotech (0 associated side effects) For the long-term treatment of growth failure in pediatric patients with Primary IGFD or with GH gene deletion who have developed neutralizing antibodies to GH. It is not indicated to treat Secondary IGFD resulting from GH deficiency, malnutrition, hypothyroidism or other causes; it is not a substitute for GH therapy.

alpha-d-mannose-6-phosphate: experimental small molecule (0 associated side effects)

known side effects mediated through drugs targeting this protein:

\*\*\*\*\*  
\*\*\*\*\*

Sodium-dependent serotonin transporter - Group: Transporter  
Treated with:

fluvoxamine: approved small molecule (363 associated side effects) For management of depression and for Obsessive Compulsive Disorder (OCD). Has also been used in the management of bulimia nervosa.

phentermine: illicit, approved small molecule (21 associated side effects) For the treatment and management of obesity.

tramadol: approved small molecule (490 associated side effects) Indicated in the treatment of moderate to severe pain. Consider for those prone to constipation or respiratory depression. Tramadol is used to treat postoperative, dental, cancer, and acute musculoskeletal pain and as an adjuvant to NSAID therapy in patients with osteoarthritis.

citalopram: approved small molecule (467 associated side effects) For the treatment of depression. Unlabeled indications include: treatment of mild dementia-associated agitation in nonpsychotic patients, smoking cessation, ethanol abuse, obsessive-compulsive disorder (OCD) in children, and diabetic neuropathy.

venlafaxine: approved small molecule (507 associated side effects) For the management of major depressive disorder (MDD), generalized anxiety disorder (GAD), social anxiety disorder (social phobia), panic disorder with or without agoraphobia, and vasomotor symptoms in women with breast cancer and in postmenopausal women.

atomoxetine: approved small molecule (140 associated side effects) For the treatment of Attention-Deficit/Hyperactivity Disorder (ADHD) alone or in combination with behavioral treatment, as an adjunct to psychological, educational, social, and other remedial measures.

amitriptyline: approved small molecule (109 associated side effects) For the treatment of depression, chronic pain, irritable bowel syndrome, sleep disorders, diabetic neuropathy, agitation and insomnia, and migraine prophylaxis.

protriptyline: approved small molecule (92 associated side effects) For the treatment of depression.

methylphenidate: approved small molecule (262 associated side effects) For use as an integral part of a total treatment program which typically includes other remedial measures (psychological, educational, social) for a stabilizing effect in children with a behavioral syndrome characterized by the following group of developmentally inappropriate symptoms: moderate-to-severe distractibility, short attention span, hyperactivity, emotional lability, and impulsivity.

imipramine: approved small molecule (100 associated side effects) For the relief of symptoms of depression and as temporary adjunctive therapy in reducing enuresis in children aged 6 years and older. May also be used to manage panic disorders, with or without agoraphobia, as a second line agent in ADHD, management of eating disorders, for short-term management of acute depressive episodes in bipolar disorder and schizophrenia, and for symptomatic treatment of postherpetic neuralgia.

fluoxetine: approved small molecule (516 associated side effects) Labeled indication include: major depressive disorder (MDD), moderate to severe bulimia nervosa, obsessive-compulsive disorder (OCD), premenstrual dysphoric disorder (PMDD), panic disorder with or without agoraphobia, and combination treatment with olanzapine for treatment-resistant or bipolar I depression. Unlabeled indications include: selective mutism, mild dementia-associated agitation in nonpsychotic patients, post-traumatic stress disorder (PTSD), social anxiety disorder, chronic neuropathic pain, fibromyalgia, and Raynaud's phenomenon.

duloxetine: approved small molecule (269 associated side effects) For the acute and maintenance treatment of major depressive disorder (MDD), as well as acute management of generalized anxiety disorder. Also used for the management of neuropathic pain associated with diabetic peripheral neuropathy, and fibromyalgia. Has been used in the management of moderate to severe stress urinary incontinence (SUI) in women.

dextromethorphan: approved small molecule (0 associated side effects) For treatment and relief of dry cough.

nortriptyline: approved small molecule (91 associated side effects) For the treatment of depression, chronic pain, irritable bowel syndrome, sleep disorders, diabetic neuropathy, agitation and insomnia, and migraine prophylaxis.

amoxapine: approved small molecule (103 associated side effects) For the relief of symptoms of depression in patients with neurotic or reactive depressive disorders as well as endogenous and psychotic depressions. May also be used to treat depression accompanied by anxiety or agitation.

fenfluramine: illicit, withdrawn small molecule (0 associated side effects) For the management of exogenous obesity as a short-term (a few weeks) adjunct in a regimen of weight reduction based on caloric restriction.

mazindol: approved small molecule (0 associated side effects) Used in short-term (a few weeks) treatment of exogenous obesity in conjunction with a regimen of weight reduction based on caloric restriction, exercise, and behavior modification in patients with a body mass index of 30 kg of body weight per height in meters

squared (kg/m<sup>2</sup>) or in patients with a body mass index of 27 kg/m<sup>2</sup>; in the presence of risk factors such as hypertension, diabetes, or hyperlipidemia.

trazodone: approved small molecule (194 associated side effects) For the treatment of depression.

verapamil: approved small molecule (113 associated side effects) For the treatment of hypertension, angina, and cluster headache prophylaxis.

paroxetine: approved small molecule (505 associated side effects) Labeled indications include: major depressive disorder (MDD), panic disorder with or without agoraphobia, obsessive-compulsive disorder (OCD), social anxiety disorder (social phobia), generalized anxiety disorder (GAD), post-traumatic stress disorder (PTSD), and premenstrual dysphoric disorder (PMDD). Unlabeled indications include: eating disorders, impulse control disorders, vasomotor symptoms of menopause, obsessive-compulsive disorder (OCD) in children, and mild dementia-associated agitation in nonpsychotic individuals.

trimipramine: approved small molecule (0 associated side effects) For the treatment of depression and depression accompanied by anxiety, agitation or sleep disturbance

minaprine: approved small molecule (0 associated side effects) For the treatment of depression

pseudoephedrine: approved small molecule (0 associated side effects) For the treatment of nasal congestion, sinus congestion, Eustachian tube congestion, and vasomotor rhinitis, and as an adjunct to other agents in the optimum treatment of allergic rhinitis, croup, sinusitis, otitis media, and tracheobronchitis. Also used as first-line therapy of priapism.

cocaine: illicit, approved small molecule (13 associated side effects) For the introduction of local (topical) anesthesia of accessible mucous membranes of the oral, laryngeal and nasal cavities.

tegaserod: withdrawn small molecule (125 associated side effects) Provides relief from the symptoms of irritable bowel syndrome including chronic idiopathic constipation.

sertraline: approved small molecule (319 associated side effects) For the management of major depressive disorder, posttraumatic stress disorder, obsessive-compulsive disorder, panic disorder with or without agoraphobia, premenstrual dysphoric disorder, social phobia, premature ejaculation, and vascular headaches.

sibutramine: illicit, approved, withdrawn small molecule (80 associated side effects) For the treatment of obesity.

chlorpheniramine: approved small molecule (47 associated side effects) For the treatment of rhinitis, urticaria, allergy, common cold, asthma and hay fever.

doxepin: approved small molecule (210 associated side effects) Labeled indications: depression and insomnia. Unlabeled indications: chronic and neuropathic pain, anxiety, idiopathic urticaria.

nefazodone: approved, withdrawn small molecule (246 associated side effects) For the treatment of depression.

desipramine: approved small molecule (120 associated side effects) For relief of symptoms in various depressive syndromes,

especially endogenous depression. It has also been used to manage chronic peripheral neuropathic pain, as a second line agent for the management of anxiety disorders (e.g. panic disorder, generalized anxiety disorder), and as a second or third line agent in the ADHD management.

escitalopram: approved small molecule (0 associated side effects) Labeled indications include major depressive disorder (MDD) and generalized anxiety disorder (GAD). Unlabeled indications include treatment of mild dementia-associated agitation in nonpsychotic patients.

dexfenfluramine: illicit, approved, withdrawn small molecule (0 associated side effects) For the management of obesity including weight loss and maintenance of weight loss in patients on a reduced calorie diet

clomipramine: approved small molecule (349 associated side effects)

ephedra: approved, withdrawn, nutraceutical small molecule (0 associated side effects) Ephedra is widely used by athletes, despite a lack of evidence that it enhances athletic performance. Ephedra has also been used for weight loss.

mmda: illicit, experimental small molecule (0 associated side effects) MDMA is a recreational drug. It has no current medical uses and is a Schedule I controlled substance in the USA at present.

3,4-methylenedioxymethamphetamine: illicit, experimental small molecule (0 associated side effects) Clinical trials are now testing the therapeutic potential of MDMA for post-traumatic stress disorder (PTSD) and anxiety associated with terminal cancer. MDMA is one of the four most widely used illicit drugs in the U.S.

4-methoxyamphetamine: illicit, experimental small molecule (0 associated side effects)

zimeclidine: withdrawn small molecule (0 associated side effects) For the treatment of depression.

amineptine: illicit, withdrawn small molecule (0 associated side effects) For the treatment of depression.

milnacipran: approved small molecule (110 associated side effects) Milnacipran is used to treat moderate to severe clinical depression and chronic pain.

mianserin: approved small molecule (0 associated side effects) For the treatment of depression.

vilazodone: approved small molecule (0 associated side effects) Vilazodone is approved for treatment of acute episodes of major depression. Labeling of vilazodone describes an increased risk of suicidal thoughts in children, adolescents and young adults. The use of vilazodone in pediatrics is not indicated. Its use with monoamine oxidase inhibitors (MAOI) is contraindicated due to increased risk of serotonin syndrome. Once the MAOI is discontinued, a 14-day washout period must pass before starting vilazodone.

desvenlafaxine: approved small molecule (83 associated side effects) Desvenlafaxine is indicated for the treatment of major depressive disorder in adults.

dexmethylphenidate: approved small molecule (262 associated side effects) Dexmethylphenidate is used as a treatment for ADHD, ideally in conjunction with psychological, educational, behavioral or other forms of treatment.

1164 known side effects mediated through drugs targeting this protein:

5q minus syndrome  
Abdominal discomfort    Abdominal distension  
  Abdominal pain    Abdominal pain lower    Abdominal pain upper  
  Abdominal tenderness    Abnormal behaviour    Abnormal dreams  
  Abnormal faeces    Abortion spontaneous    Abscess  
  Accommodation disorder    Acidosis    Acne    Acute abdomen    Acute  
coronary syndrome  
  Acute myocardial infarction    Acute psychosis  
  Adenocarcinoma    Adjustment disorder    Adverse reaction  
  Affect lability    Ageusia    Aggression    Agitation    Agoraphobia  
  Agranulocytosis    Akathisia    Akinesia    Alanine  
aminotransferase decreased    Alanine aminotransferase increased  
  Albuminuria  
  Alcohol abuse    Alcohol intolerance    Alcohol  
poisoning    Alopecia    Alveolitis allergic    Amblyopia    Amenorrhoea  
  Amnesia    Amyotrophic lateral sclerosis    Anaemia    Anal  
pruritus    Anaphylactic shock    Anaphylactoid reaction    Aneurysm  
  Anger    Angina pectoris    Angina unstable    Angioedema    Angiopathy  
  Angle closure glaucoma    Anisocytosis    Anorectal discomfort  
  Anorectal disorder    Anorgasmia    Anosmia    Antidiuretic  
hormone abnormality    Antinuclear antibody positive    Antisocial  
behaviour    Antisocial personality disorder    Anuria    Anxiety  
  Aortic aneurysm    Aortic dissection  
  Apathy    Aphasia  
  Apthous stomatitis    Aplasia    Aplastic anaemia    Apnoea  
  Appendicitis    Application site reaction    Apraxia  
  Arrhythmia    Arrhythmia supraventricular    Arterial disorder  
  Arteritis    Arthralgia    Arthritis    Arthropathy  
  Asocial behaviour  
  Aspartate aminotransferase increased    Assisted fertilisation  
  Asthenia    Asthma    Ataxia    Atelectasis  
  Atrial  
fibrillation    Atrial flutter    Atrioventricular block  
  Atrioventricular block complete    Atrioventricular block first  
degree    Atrioventricular dissociation    Atrophic  
vulvovaginitis    Atrophy    Auricular swelling    Autonomic nervous  
system imbalance    Autonomic neuropathy    Azoospermia  
  Azotaemia    Back  
disorder    Back pain    Bacteraemia    Bacterial infection    Balance  
disorder    Balanitis    Balanoposthitis    Basophilia    Benign breast  
neoplasm    Benign neoplasm    Benign neoplasm of skin    Biliary  
colic    Biliary tract disorder    Bipolar I disorder    Bipolar disorder  
  Bladder dilatation    Bladder pain    Bleeding time  
prolonged    Blepharitis    Blepharospasm    Blindness    Blister    Blood  
alkaline phosphatase increased    Blood amylase increased    Blood  
antidiuretic hormone abnormal    Blood bilirubin increased    Blood  
cholesterol increased    Blood creatine phosphokinase increased    Blood  
creatinine increased    Blood disorder    Blood glucose abnormal    Blood  
glucose increased    Blood lactate dehydrogenase increased    Blood  
potassium abnormal    Blood potassium decreased    Blood potassium  
increased    Blood pressure diastolic decreased    Blood pressure  
fluctuation    Blood pressure increased    Blood prolactin increased  
  Blood sodium increased    Blood triglycerides increased    Blood  
urea increased    Blood uric acid increased    Blood urine  
present    Blunted affect    Body temperature decreased    Body  
temperature increased    Bone disorder    Bone pain    Bradycardia  
  Bradykinesia    Brain oedema    Breast atrophy    Breast  
cancer    Breast cancer female    Breast cyst    Breast discharge  
  Breast disorder    Breast disorder female    Breast engorgement  
  Breast enlargement    Breast feeding    Breast neoplasm

Breast pain Breath odour Bronchitis Bronchospasm  
 Bruxism Buccoglossal syndrome Bulimia nervosa Bundle  
 branch block Bundle branch block right Burning sensation  
 Bursitis Cachexia Calculus urinary Candidiasis Capillary  
 fragility Cardiac arrest Cardiac death Cardiac disorder  
 Cardiac failure Cardiac failure congestive Cardiac  
 fibrillation Cardiac flutter Cardiac murmur Cardiac output  
 decreased Cardiac valve disease Cardio-respiratory arrest  
 Cardiomyopathy Cardiovascular disorder Carpal tunnel  
 syndrome Cataract Catatonia Cellulitis Central nervous system  
 neoplasm Cerebral arteritis Cerebral artery embolism  
 Cerebral haemorrhage Cerebral ischaemia Cerebrovascular  
 accident Cerebrovascular disorder Cerumen impaction Cervical  
 dysplasia Cervicitis Cervix disorder Change of bowel habit  
 Cheilitis Chest discomfort Chest pain Chills Chloasma  
 Cholecystitis Cholelithiasis Cholestasis Cholinergic  
 syndrome Chondrodystrophy Chondropathy Choreoathetosis  
 Chromatopsia Chronic lymphocytic leukaemia  
 Coagulopathy Cognitive disorder Cogwheel rigidity Cold  
 sweat Colitis Colitis ischaemic Colitis ulcerative Collagen  
 disorder Coma Coma hepatic Completed suicide Confusional state  
 Congenital anomaly Congenital eye disorder  
 Conjunctival haemorrhage Conjunctival oedema  
 Conjunctivitis Connective tissue disorder Constipation  
 Conversion disorder Convulsion Coordination abnormal  
 Corneal lesion Coronary artery disease Coronary artery  
 occlusion Cough Cough decreased Crocodile tears syndrome  
 Crying Crystal urine Crystalluria Cyanosis  
 Cystitis Cystitis noninfective Cytolytic hepatitis  
 Deafness Death Decreased appetite Deep vein thrombosis  
 Deficiency anaemia Dehydration Delirium Delusion  
 Dementia Dental caries Dependence Depersonalisation  
 Depressed level of consciousness Depressed mood Depression  
 Depression suicidal Depressive symptom Derealisation  
 Dermal cyst Dermatitis atopic Dermatitis bullous Dermatitis  
 contact Dermatitis exfoliative Dermoid cyst Developmental  
 delay Diabetes mellitus Diabetic ketoacidosis Diarrhoea Diarrhoea  
 haemorrhagic Diplopia Discomfort Disorientation  
 Dissociation Disturbance in attention Disturbance in  
 sexual arousal Diverticulitis Diverticulum Dizziness  
 Dizziness postural Drug abuse Drug dependence Drug effect  
 decreased Drug eruption Drug interaction Drug level decreased  
 Drug level increased Drug withdrawal syndrome Dry eye  
 Dry mouth Dry skin Dry throat Duodenal ulcer Duodenitis  
 Dysarthria Dysgeusia Dyskinesia Dyslipidaemia  
 Dysmenorrhoea Dyspareunia Dyspepsia Dysphagia Dysphonia  
 Dysphoria Dysplasia Dyspnoea Dysthymic disorder  
 Dystonia Dysuria Ear congestion Ear discomfort Ear  
 disorder Ear infection Ear pain Ecchymosis Eclampsia  
 Eczema Effusion Ejaculation delayed Ejaculation  
 disorder Ejaculation failure Electrocardiogram PR interval  
 Electrocardiogram QRS complex Electrocardiogram QT  
 prolonged Electrocardiogram ST segment Electrocardiogram abnormal  
 Electrocardiogram change Electroencephalogram abnormal  
 Elevated mood Embolism Emotional disorder Emphysema

Encephalopathy    Endocrine disorder    Endometrial disorder  
 Endometrial hyperplasia    Endometriosis    Energy increased  
 Enteritis    Enuresis    Eosinophil count increased  
 Eosinophilia    Eosinophilic pneumonia    Epidermal necrosis  
 Epididymitis    Epigastric discomfort    Epilepsy    Epistaxis  
 Erectile dysfunction    Eructation    Erysipelas    Erythema  
 multiforme    Erythema nodosum    Euphoric mood    Eustachian tube  
 disorder    Exophthalmos    Exostosis    Extrapyrarnidal disorder  
 Extrasystoles    Eye allergy    Eye disorder    Eye haemorrhage  
 Eye infection    Eye irritation    Eye pain    Eye pruritus  
 Eyelid disorder    Eyelid ptosis    Face oedema    Faecal  
 incontinence    Faecalith    Faecaloma    Faeces discoloured  
 Fasciitis    Fasting    Fat intolerance    Fatigue    Feeling  
 abnormal    Feeling cold    Feeling drunk    Feeling hot    Feeling  
 jittery    Female sexual dysfunction    Fibroadenoma of breast  
 Fibrocystic breast disease    Fibrosis    Flat affect    Flatulence  
 Fluid retention    Flushing    Folliculitis    Food craving  
 Frequent bowel movements    Fungal infection    Fungal skin  
 infection    Furuncle    Gait disturbance    Galactorrhoea    Gamma-  
 glutamyltransferase increased    Gastric dilatation    Gastric  
 disorder    Gastric pH decreased    Gastric polyps    Gastric ulcer  
 Gastric ulcer haemorrhage    Gastritis    Gastroenteritis  
 Gastrointestinal carcinoma    Gastrointestinal disorder  
 Gastrointestinal haemorrhage    Gastrointestinal infection  
 Gastrointestinal obstruction    Gastrointestinal pain  
 Gastrointestinal tract irritation    Gastrointestinal ulcer  
 Gastrooesophageal reflux disease    Generalised oedema  
 Genital discharge    Genital disorder female    Genital disorder  
 male    Genital haemorrhage    Genital pain    Gingival bleeding  
 Gingival hyperplasia    Gingival recession    Gingivitis  
 Glaucoma    Globulins increased    Glomerulonephritis  
 membranous    Glossitis    Glucose tolerance impaired    Glycosuria  
 Goitre    Gout    Grand mal convulsion    Granuloma  
 Gravitational oedema    Groin pain    Growth retardation  
 Gynaecomastia    Haematemesis    Haematochezia    Haematocrit  
 decreased    Haematocrit increased    Haematoma    Haemospermia  
 Haematuria    Haemochromatosis    Haemoglobin decreased    Haemoglobin  
 increased    Haemoglobinuria    Haemolytic anaemia    Haemoptysis  
 Haemorrhage    Haemorrhagic disorder    Haemorrhoids    Hair colour  
 changes    Hair disorder    Hair texture abnormal    Hallucination  
 Hallucination, auditory    Hallucination, tactile  
 Hallucination, visual    Hangover    Headache    Hearing impaired  
 Heart rate irregular    Heat rash    Helicobacter infection  
 Hemiparesis    Hemiplegia    Hepatic cirrhosis    Hepatic enzyme  
 increased    Hepatic failure    Hepatic function abnormal    Hepatic  
 necrosis    Hepatic steatosis    Hepatitis    Hepatitis fulminant  
 Hepatobiliary disease    Hepatocellular injury    Hepatomegaly  
 Hepatosplenomegaly    Hernia    Herpes simplex    Herpes  
 virus infection    Herpes zoster    Hiccups    High density  
 lipoprotein decreased    Hirsutism    Homicidal ideation    Hordeolum  
 Hormone level abnormal    Hostility    Hot flush    Hydrocephalus  
 Hyperacusis    Hyperaemia    Hyperaesthesia    Hyperbilirubinaemia  
 Hypercalcaemia    Hypercalciuria    Hyperchlorhydria  
 Hypercholesterolaemia    Hyperglycaemia    Hyperhidrosis  
 Hyperkalaemia    Hyperkeratosis    Hyperkinesia



Hyperlipidaemia    Hypermagnesaemia    Hyperpathia  
 Hyperphosphataemia    Hyperplasia    Hyperprolactinaemia  
 Hyperpyrexia    Hyperreflexia    Hypersensitivity    Hypersomnia  
 Hypertension    Hypertensive crisis    Hyperthermia  
 Hyperthyroidism    Hypertonia    Hypertrichosis  
 Hypertriglyceridaemia    Hypertrophic cardiomyopathy    Hypertrophy  
 Hyperuricaemia    Hyperventilation    Hypervigilance    Hyphaema  
 Hypnagogic hallucination    Hypoaesthesia    Hypoaesthesia  
 oral    Hypocalcaemia    Hypocholesterolaemia    Hypochondriasis  
 Hypochromic anaemia    Hypoglycaemia    Hypohidrosis  
 Hypokalaemia    Hypokinesia    Hypomania    Hypomenorrhoea  
 Hyponatraemia    Hypophosphataemia    Hypoproteinaemia  
 Hyporeflexia    Hypotension    Hypothermia    Hypothyroidism  
 Hypotonia    Hypouricaemia    Hypoventilation    Hypovolaemia  
 Hypoxia    IIIrd nerve paralysis    Idiopathic thrombocytopenic  
 purpura    Ileitis    Ileus    Ileus paralytic    Ill-defined disorder  
 Illusion    Immune system disorder    Immunoglobulins increased  
 Impaired gastric emptying    Impaired healing    Inappropriate  
 antidiuretic hormone secretion    Incontinence    Increased  
 appetite    Increased bronchial secretion    Increased tendency to  
 bruise    Induration    Infarction    Infection    Infection  
 susceptibility increased    Infertility female    Infestation  
 Inflammation    Influenza    Influenza like illness    Ingrowing  
 nail    Initial insomnia    Inner ear disorder    Insomnia  
 Intermittent claudication    International normalised ratio  
 increased    Interstitial lung disease    Intestinal functional  
 disorder    Intestinal ischaemia    Intestinal obstruction    Intra-  
 uterine death    Intraocular pressure increased    Iritis    Iron  
 deficiency    Iron deficiency anaemia    Irritability    Irritable  
 bowel syndrome    Ischaemia    Jaundice    Jaundice cholestatic    Joint  
 crepitation    Joint range of motion decreased    Joint stiffness    Joint  
 swelling    Keratitis    Ketosis    Labyrinthitis    Lacrimal disorder  
 Lacrimation decreased    Lacrimation increased    Large intestinal  
 haemorrhage    Laryngeal disorder    Laryngeal oedema    Laryngitis  
 Laryngospasm    Leiomyoma    Lethargy    Leukaemia    Leukaemoid  
 reaction    Leukocytoclastic vasculitis    Leukocytosis    Leukoderma  
 Leukopenia    Libido decreased    Libido increased    Lichenoid  
 keratosis    Lip blister    Lip dry    Lipoma    Liver disorder    Liver  
 function test abnormal    Liver injury    Liver tenderness    Local  
 reaction    Localised infection    Loss of consciousness    Loss of  
 libido    Low density lipoprotein increased    Lower respiratory  
 tract infection    Lung adenocarcinoma stage I    Lung disorder  
 Lymphadenitis    Lymphadenopathy    Lymphocyte count abnormal  
 Lymphocyte count decreased    Lymphocyte count increased  
 Lymphocytic leukaemia    Lymphocytosis    Lymphoedema    Lymphoma  
 Lymphopenia    Macular degeneration    Macule    Maculopathy    Major  
 depression    Malaise    Male sexual dysfunction    Malignant  
 melanoma    Mammogram abnormal    Mania    Mastitis    Mediastinal  
 disorder    Melaena    Melanosis    Memory impairment    Meningitis  
 Menometrorrhagia    Menopausal symptoms    Menopause    Menorrhagia  
 Menstrual disorder    Menstruation delayed    Menstruation  
 irregular    Mental disability    Mental disorder    Mental retardation  
 Mental status changes    Methaemoglobinaemia    Metrorrhagia  
 Microcytic anaemia    Micturition disorder    Micturition  
 urgency    Middle insomnia    Migraine    Miosis    Mitral valve

disease      Monocyte count increased      Monocytosis Mood swings  
Motion sickness Mouth ulceration Movement disorder Mucous  
membrane disorder Multiple myeloma Muscle contractions involuntary  
Muscle contracture      Muscle fatigue      Muscle haemorrhage  
Muscle relaxant therapy      Muscle rigidity      Muscle spasms  
Muscle spasticity Muscle tightness Muscle twitching Muscular  
weakness      Musculoskeletal chest pain      Musculoskeletal discomfort  
Musculoskeletal disorder      Musculoskeletal pain  
Musculoskeletal stiffness      Mutism      Myalgia      Mydriasis  
Myelitis      Myocardial infarction      Myocardial ischaemia  
Myoclonus      Myopathy      Myositis      Nail discolouration      Nail  
disorder      Nasal congestion      Nasal oedema      Nasopharyngitis  
Nausea      Neck pain      Necrosis      Negativism      Neoplasm  
Neoplasm malignant      Nephritis      Nephrolithiasis      Nephropathy  
Nervous system disorder      Nervousness      Neuralgia      Neuritis  
Neuroleptic malignant syndrome      Neuropathy peripheral  
Neurosis      Neutropenia      Neutrophil count decreased      Neutrophil  
count increased      Night blindness      Night sweats      Nightmare  
Nocturia      Nodal arrhythmia      Nodule      Normochromic  
normocytic anaemia      Nuchal rigidity      Nystagmus      Obesity  
Obstruction Obstructive airways disorder Ocular hyperaemia  
Oculogyric crisis Oedema peripheral Oesophageal achalasia  
Oesophageal disorder      Oesophageal spasm Oesophageal stenosis  
Oesophageal ulcer Oesophagitis      Oligomenorrhoea      Oliguria  
Onychoclasia      Onychomycosis      Optic neuritis      Oral  
candidiasis Oral pain      Orchitis noninfective      Orgasm abnormal  
Oropharyngeal discomfort      Oropharyngeal pain      Orthostatic  
hypotension Osteoarthritis      Osteoarthropathy      Osteomyelitis  
Osteonecrosis      Osteopenia      Osteoporosis      Osteosclerosis  
Otitis externa      Otitis media      Ovarian cyst      Ovarian  
disorder      Pain      Pain in extremity      Pain in jaw      Pallor  
Palpitations      Pancreatitis      Pancreatitis acute  
Pancytopenia      Panic attack      Panic reaction  
Papilloedema      Papule      Paraesthesia      Paraesthesia oral  
Paralysis      Paranoia      Paresis      Parity      Parosmia  
Parotid gland enlargement      Parotitis      Pathological fracture  
Pelvic inflammatory disease      Pelvic pain      Penis disorder  
Peptic ulcer      Pericarditis      Perineal pain  
Periodontitis      Periorbital oedema      Peripheral coldness  
Peripheral ischaemia      Peripheral vascular disorder      Peritonitis  
Peroneal nerve palsy      Personality change      Personality  
disorder      Petechiae      Pharyngeal disorder      Pharyngeal oedema  
Pharyngitis Pharyngitis streptococcal      Phlebitis      Phobia  
Photophobia Photopsia      Photosensitivity reaction  
Piloerection      Plantar fasciitis      Plasmacytoma      Platelet  
count decreased      Pleural disorder      Pleural effusion      Pleurisy  
Pneumonia      Pneumothorax      Poisoning      Pollakiuria  
Polyarteritis nodosa      Polycythaemia vera      Polymenorrhoea  
Polyp Polyuria      Poor peripheral circulation      Porphyria  
Postmenopausal haemorrhage      Postpartum disorder      Pregnancy  
Premature baby      Premature delivery      Premature ejaculation  
Premenstrual syndrome      Pressure of speech      Presyncope  
Priapism      Proctalgia      Proctitis      Productive cough      Prostate  
cancer      Prostatic disorder      Prostatitis      Prostatomegaly  
Protein total decreased      Protein urine present      Proteinuria

Prothrombin level decreased Prothrombin level increased  
 Prothrombin time shortened Protrusion tongue Prurigo  
 Pruritus Pruritus generalised Pruritus genital Psoriasis  
 Psychomotor retardation Psychosomatic disease Psychotic  
 disorder Pulmonary arterial hypertension Pulmonary congestion  
 Pulmonary embolism Pulmonary eosinophilia Pulmonary  
 fibrosis Pulmonary function test decreased Pulmonary hypertension  
 Pulmonary infarction Pulmonary oedema Pupils unequal  
 Purpura Pyelonephritis Pyuria Quadripareisis Rales  
 Rash Rash erythematous Rash follicular Rash macular Rash  
 maculo-papular Rash pustular Raynaud's phenomenon Rectal  
 haemorrhage Rectal prolapse Rectal tenesmus Red blood cell  
 abnormality Red blood cell count decreased Red blood cell count  
 increased Red blood cell sedimentation rate increased Reflux  
 oesophagitis Renal cyst Renal failure acute Renal impairment  
 Renal pain Reproductive tract disorder Respiratory depression  
 Respiratory disorder Respiratory distress Respiratory  
 failure Respiratory rate decreased Respiratory tract congestion  
 Respiratory tract infection Respiratory tract infection viral  
 Restless legs syndrome Retching Retinal detachment  
 Retinal disorder Retinal haemorrhage Retrograde ejaculation  
 Reversible ischaemic neurological deficit Rhabdomyolysis  
 Rheumatoid arthritis Rhinitis Rhinitis allergic Rhinitis  
 seasonal Rhinorrhoea Rhonchi Riley-Day syndrome Rosacea  
 Salivary gland enlargement Salivary hypersecretion  
 Salpingitis Scab Schizophrenia Schizophreniform disorder  
 Scleral haemorrhage Scleritis Scotoma Screaming  
 Scrotal pain Seasonal allergy Seborrhoeic dermatitis  
 Sedation Sensation of foreign body Sensation of heaviness  
 Sensitisation Sensory disturbance Sensory loss  
 Sepsis Serum sickness Sexual dysfunction Shock  
 Sialoadenitis Sicca syndrome Sinus arrest Sinus  
 arrhythmia Sinus bradycardia Sinus congestion Sinus headache Sinus  
 tachycardia Sinusitis Skin atrophy Skin discolouration Skin  
 disorder Skin exfoliation Skin hyperpigmentation Skin hypertrophy  
 Skin irritation Skin mass Skin odour abnormal Skin striae  
 Skin ulcer Sleep apnoea syndrome Sleep disorder Sleep  
 paralysis Sluggishness Small intestinal obstruction Sneezing  
 Social avoidant behaviour Somnambulism Somnolence  
 Speech disorder Sphincter of Oddi dysfunction Sputum  
 increased Status epilepticus Stevens-Johnson syndrome  
 Sticky skin Stomach dilation procedure Stomatitis Strabismus  
 Strangury Stridor Stupor Subileus Sudden cardiac  
 death Sudden death Suicidal behaviour Suicidal ideation  
 Suicide attempt Supraventricular extrasystoles  
 Supraventricular tachycardia Surgery Swelling Syncope  
 Synovial cyst Systemic lupus erythematosus Tachycardia  
 Tardive dyskinesia Tearfulness Tenderness Tendinosis  
 contracture Tendon disorder Tendonitis Tenosynovitis Tension  
 Tension headache Teratogenicity Terminal insomnia Testicular  
 disorder Testicular pain Testicular swelling Tetany  
 Therapeutic response decreased Thinking abnormal Thirst  
 Throat irritation Throat tightness Thrombocytopenia  
 Thrombocytopenic purpura Thrombocytosis Thrombophlebitis  
 Thrombosis Thyroid neoplasm Thyroiditis Tic Tinea pedis

Tinnitus Tongue discolouration Tongue disorder Tongue  
 oedema Tongue ulceration Tooth abscess Tooth disorder Tooth  
 impacted Tooth infection Tooth malformation Toothache  
 Torsade de pointes Torticollis Toxic epidermal necrolysis  
 Tracheal disorder Tracheitis Transaminases increased  
 Transient ischaemic attack Tremor Trismus Ulcer  
 haemorrhage Ulcerative keratitis Unintended pregnancy Upper  
 respiratory tract infection Urethral disorder Urethral pain  
 Urethritis Urinary hesitation Urinary incontinence  
 Urinary retention Urinary tract disorder Urinary tract  
 infection Urine abnormality Urine analysis abnormal Urine flow  
 decreased Urine odour abnormal Urine output increased Urogenital  
 disorder Urticaria Uterine haemorrhage Uterine inflammation  
 Uterine leiomyoma Uterine neoplasm Uterine spasm  
 Uterovaginal prolapse Uveitis VIIIth nerve paralysis  
 Vaginal cyst Vaginal discharge Vaginal haemorrhage  
 Vaginal infection Vaginal inflammation Varicose vein  
 Vascular headache Vascular insufficiency Vascular purpura  
 Vasculitis Vasculitis necrotising Vasoconstriction  
 Vasodilation procedure Vasospasm Venous insufficiency  
 Venous thrombosis Ventricular arrhythmia Ventricular  
 extrasystoles Ventricular fibrillation Ventricular  
 tachycardia Vertigo Vestibular disorder Viral diarrhoea Viral  
 infection Vision blurred Visual acuity reduced Visual impairment  
 Vitreous disorder Vomiting Vulval disorder Vulvovaginal  
 candidiasis Vulvovaginal dryness Vulvovaginal mycotic infection  
 Waxy flexibility Weight decreased Weight increased Wheezing  
 White blood cell count abnormal White blood cell count  
 increased White blood cell disorder Withdrawal syndrome Wound  
 haemorrhage Wound infection Xerophthalmia Yawning

\*\*\*\*\*  
 \*\*\*\*\*

Thyroid hormone receptor, alpha isoform 1 variant - Group: Receptor  
 Treated with:  
 {4-[4-hydroxy-3-(1-methylethyl)benzyl]-3,5-dimethylphenoxy}acetic  
 acid: experimental small molecule (0 associated side effects)

known side effects mediated through drugs targeting this protein:

\*\*\*\*\*  
 \*\*\*\*\*

Angiotensin-1 receptor - Group: Enzyme  
 Treated with:  
 n-{4-methyl-3-[(3-pyrimidin-4-ylpyridin-2-yl)amino]phenyl}-3-  
 (trifluoromethyl)benzamide: experimental small molecule (0  
 associated side effects)

known side effects mediated through drugs targeting this protein:

\*\*\*\*\*  
 \*\*\*\*\*

Prolactin receptor - Group: Receptor  
 Treated with:

somatropin recombinant: approved biotech (0 associated side effects) For treatment of dwarfism, acromegaly and prevention of HIV-induced weight loss  
fluoxymesterone: illicit, approved small molecule (35 associated side effects) In males, used as replacement therapy in conditions associated with symptoms of deficiency or absence of endogenous testosterone. In females, for palliation of androgen responsive recurrent mammary cancer in women who are more than one year but less than five years postmenopausal.

35 known side effects mediated through drugs targeting this protein:

Acne Alopecia Amenorrhoea Anaphylactic shock Anaphylactoid reaction  
Androgenetic alopecia Anxiety Azoospermia Blood cholesterol increased  
Coma Coma hepatic Death Disturbance in sexual arousal  
Electrolyte imbalance Enlarged clitoris Gynaecomastia  
Haemoglobin Haemorrhage Headache Hirsutism Hypernatraemia  
Hypersensitivity Hypertrophy Jaundice Jaundice cholestatic  
Libido decreased Menstruation irregular Nausea  
Paraesthesia Peliosis hepatis Polycythaemia Purpura  
Seborrhoeic dermatitis Vascular purpura Virilism

\*\*\*\*\*  
\*\*\*\*\*

Voltage-dependent P/Q-type calcium channel subunit alpha-1A - Group: Channel

Treated with:

pregabalin: illicit, approved small molecule (713 associated side effects) For management of neuropathic pain associated with diabetic peripheral neuropathy and postherpetic neuralgia.

verapamil: approved small molecule (113 associated side effects) For the treatment of hypertension, angina, and cluster headache prophylaxis.

loperamide: approved small molecule (41 associated side effects) For the control and symptomatic relief of acute nonspecific diarrhea and of chronic diarrhea associated with inflammatory bowel disease or gastroenteritis. Also used for reducing the volume of discharge from ileostomies.

bepridil: approved small molecule (0 associated side effects) For the treatment of chronic stable angina (classic effort-associated angina).

741 known side effects mediated through drugs targeting this protein:

Abdominal discomfort Abdominal distension Abdominal pain  
Abnormal dreams Abnormal faeces Abscess Accommodation disorder  
Acidosis Acne Acute coronary syndrome Adenoma benign  
Adrenal insufficiency Ageusia Agitation Akathisia Alanine aminotransferase increased  
Albuminuria Alcohol intolerance Alcohol poisoning Alopecia Altered state of consciousness  
Amblyopia Amenorrhoea Amnesia Anaemia Anaemia macrocytic  
Anaemia megaloblastic Anaphylactic shock Anaphylactoid reaction  
Aneurysm Angina pectoris Angioedema Angiopathy  
Anorectal discomfort Anorectal disorder Anorgasmia  
Anxiety Aortic dissection Aortic valve stenosis Apathy  
Aphasia Aphthous stomatitis Apnoea Arachnoiditis  
Arrhythmia Arrhythmia supraventricular

Arterial disorder Arterial occlusive disease Arteriosclerosis  
 Arthralgia Arthritis Arthropathy Ascites Aspiration  
 Asthenia Asthma Ataxia Atelectasis Atrial  
 fibrillation Atrioventricular block Atrioventricular block  
 complete Atrioventricular block first degree Atrioventricular  
 block second degree Atrioventricular dissociation Atrophy  
 Autonomic nervous system imbalance Azotaemia Back pain  
 Bacterial infection Balance disorder Balanitis Benign  
 neoplasm of skin Biliary colic Bladder cancer Bladder neoplasm  
 Bladder pain Blepharitis Blindness Blood alkaline  
 phosphatase increased Blood amylase increased Blood creatine  
 phosphokinase increased Blood creatinine increased Blood  
 prolactin increased Blood urea increased Blood uric acid  
 increased Body temperature decreased Body temperature increased  
 Bone disorder Bone neoplasm Bone pain Bradycardia  
 Bradyphrenia Brain oedema Breast abscess Breast  
 cancer Breast disorder Breast enlargement Breast feeding  
 Breast neoplasm Breast pain Breath odour Bronchiectasis  
 Bronchiolitis Bronchitis Bronchospasm Bundle branch  
 block Bursitis Calcium metabolism disorder Calculus bladder  
 Calculus urinary Candidiasis Capillary fragility increased  
 Cardiac arrest Cardiac failure Cardiac failure congestive  
 Cardiac fibrillation Cardiac flutter Cardiomegaly  
 Cardiomyopathy Cardiovascular disorder Carotid artery  
 occlusion Carotid artery thrombosis Cataract Cellulitis  
 Central nervous system neoplasm Cerebellar syndrome  
 Cerebral haemorrhage Cerebral infarction Cerebral  
 ischaemia Cerebrovascular accident Cerebrovascular disorder  
 Cervicitis Cervix disorder Cervix neoplasm Cheilitis Chest  
 pain Chills Cholecystitis Cholelithiasis Cholestasis  
 Chondrodystrophy Chronic leukaemia Coagulopathy Cogwheel  
 rigidity Colitis ulcerative Colour blindness Coma Completed  
 suicide Confusional state Congenital anomaly Congenital  
 arterial malformation Congenital cystic kidney disease Congenital  
 genitourinary abnormality Congenital musculoskeletal anomaly  
 Conjunctivitis Connective tissue disorder Constipation  
 Convulsion Coordination abnormal Cor pulmonale Corneal  
 lesion Corneal opacity Coronary artery disease Coronary  
 artery occlusion Cough Creatinine renal clearance decreased  
 Crystal urine Crystalluria Cyanosis Cyst Cystitis  
 Cystitis noninfective Deafness Death Decreased appetite  
 Deep vein thrombosis Deficiency anaemia Dehydration  
 Delirium Delusion Dementia Dental caries Dependence  
 Depersonalisation Depressed level of consciousness Depressive  
 symptom Dermatitis Dermatitis bullous Dermatitis exfoliative  
 Developmental delay Diabetes mellitus Diabetic neuropathy  
 Diarrhoea Diarrhoea haemorrhagic Diplopia Discomfort  
 Disorientation Dissociation Disturbance in attention  
 Disturbance in sexual arousal Dizziness Drug abuse Drug  
 dependence Drug effect increased Drug level decreased Drug level  
 increased Dry eye Dry mouth Dry skin Duodenal ulcer  
 Dysarthria Dysgeusia Dyskinesia Dysmenorrhoea Dyspareunia  
 Dyspepsia Dysphagia Dysphonia Dyspnoea Dystonia  
 Dysuria Ear disorder Ear infection Ear pain  
 Ecchymosis Eczema Effusion Ejaculation disorder

Electrocardiogram QT prolonged      Electrocardiogram QT  
 shortened    Electrocardiogram ST segment depression    Electrocardiogram  
 ST segment elevation    Electrocardiogram T wave inversion  
 Electrocardiogram abnormal    Embolism    Emphysema  
 Encephalopathy    Endocarditis    Endometrial cancer  
 Endometrial disorder    Enteritis    Enterocolitis    Enzyme  
 abnormality    Eosinophilia    Epididymitis    Epilepsy    Epistaxis  
 Erectile dysfunction    Eructation    Erythema multiforme  
 Euphoric mood    Exophthalmos    Extrapyrmidal disorder  
 Extrasystoles    Eye disorder    Eye haemorrhage    Eye pain  
 Eyelid oedema    Eyelid ptosis    Face oedema    Faecal  
 incontinence    Faecalith    Faecaloma    Fatigue    Feeling abnormal  
 Feeling cold    Feeling drunk    Fibrocystic breast disease  
 Fibrosis    Flat affect    Flatulence    Fluid retention    Flushing  
 Fungal infection    Fungal skin infection    Furuncle    Gait  
 disturbance    Galactorrhoea    Gamma-glutamyltransferase increased  
 Gangrene    Gastric atony    Gastric disorder    Gastric ulcer  
 haemorrhage    Gastritis    Gastritis haemorrhagic    Gastroenteritis  
 Gastrointestinal carcinoma    Gastrointestinal disorder  
 Gastrointestinal haemorrhage    Gastrointestinal pain    Generalised  
 oedema    Genital discharge    Genitourinary tract neoplasm    Gingival  
 bleeding    Gingival hyperplasia    Gingivitis    Glaucoma    Globulins  
 increased    Glomerulonephritis    Glossitis    Glucose tolerance  
 decreased    Glycosuria    Goitre    Gout    Grand mal convulsion  
 Granuloma    Guillain-Barre syndrome    Gynaecomastia  
 Haematemesis    Haematuria    Haemoglobin    Haemoptysis    Haemorrhage  
 intracranial    Hair disorder    Hallucination    Hangover  
 Headache    Heat rash    Hemiplegia    Hepatic enzyme increased  
 Hepatic neoplasm malignant    Hepatic steatosis    Hepatitis  
 Hepatomegaly    Hernia    Herpes simplex    Herpes virus  
 infection    Herpes zoster    Hiccups    Hirsutism    Hormone level  
 abnormal    Hostility    Hydronephrosis    Hyperacusis    Hyperaesthesia  
 Hyperbilirubinaemia    Hypercalcaemia    Hypercalciuria  
 Hypercholesterolaemia    Hyperglycaemia    Hyperhidrosis  
 Hyperkalaemia    Hyperkeratosis    Hyperkinesia  
 Hyperlipidaemia    Hypernatraemia    Hyperpathia    Hyperplasia  
 Hyperprolactinaemia    Hyperreflexia    Hypersensitivity  
 Hypertension    Hyperthyroidism    Hypertonia    Hypertrophic  
 cardiomyopathy    Hypertrophy    Hyperuricaemia    Hyperventilation  
 Hypoaesthesia    Hypocalcaemia    Hypochloraemia    Hypochromic  
 anaemia    Hypoglycaemia    Hypohidrosis    Hypokalaemia  
 Hypokinesia    Hypomagnesaemia    Hypomenorrhoea    Hyponatraemia  
 Hypophosphataemia    Hypoproteinaemia    Hyporeflexia    Hypotension  
 Hypothermia    Hypothyroidism    Hypotonia    Hypoventilation  
 Hypovitaminosis    Hypoxia    Iliac nerve paralysis    Ichthyosis  
 acquired    Ileus paralytic    Ill-defined disorder    Immune system  
 disorder    Immunoglobulins increased    Impaired gastric emptying  
 Impaired healing    Incontinence    Increased appetite  
 Increased bronchial secretion    Infarction    Infection  
 Infestation    Influenza    Injection site haemorrhage    Injection  
 site pain    Injection site reaction    Insomnia    Intermittent  
 claudication    Intestinal obstruction    Intestinal perforation  
 Intestinal stenosis    Intestinal ulcer    Intracranial aneurysm  
 Intracranial pressure increased    Iritis    Iron deficiency  
 Iron deficiency anaemia    Ischaemia    Jaundice    Jaundice

cholestatic Joint swelling Keratitis Ketosis Laboratory test  
abnormal Lacrimal disorderLacrimation increased Lactic acidosis  
Laryngeal neoplasm Laryngitis Laryngospasm Left  
ventricular failure Leiomyoma Lethargy Leukaemia Leukaemoid  
reaction Leukocytosis Leukoderma Leukopenia Leukoplakia oral  
Libido decreased Libido increased Lichenoid keratosis Liver  
function test abnormal Liver tenderness Loss of consciousness Lung  
disorder Lung neoplasm malignant Lymphadenopathy  
Lymphangitis Lymphocytosis Lymphoedema Lymphoma  
Macule MaculopathyMajor depression Malaise Malignant  
melanoma Mania Mastitis Mediastinal disorder Megacolon  
Melaena Melanosis Memory impairmentMeningitis Menopause  
MenorrhagiaMenstrual disorder Mental disabilityMental  
disorder Metrorrhagia Micturition urgency Migraine  
Miosis Mouth ulceration Movement disorderMucous membrane  
disorder Multiple sclerosis Muscle atrophy Muscle  
contracture Muscle fatigue Muscle relaxant therapy Muscle  
rigidity Muscle spasms Muscle twitching Muscular weakness  
Musculoskeletal discomfort Musculoskeletal stiffness  
Myalgia Mydriasis Myelitis Myelofibrosis Myeloid  
metaplasia Myocardial infarction Myocardial ischaemia Myoclonus  
Myopathy Myositis Nail disorder Nasal septum disorder  
Nausea Neck pain Necrosis Neoplasm Neoplasm  
malignant Neoplasm prostateNephritis Nephrolithiasis Nephrotic  
syndrome Nervous system disorder NervousnessNeuritis  
Neuropathy peripheral Neurosis Night blindness Nocturia  
Nodal arrhythmia Nodule Nuchal rigidity Nystagmus  
Obesity ObstructionOcular hyperaemiaOedema peripheral  
Oesophageal achalasia Oesophageal disorder Oesophageal  
stenosis Oesophageal ulcerOesophagitis Oligomenorrhoea  
Oliguria Ophthalmoplegia Optic atrophy Optic neuritis  
Oral candidiasis Orchitis noninfective Oropharyngeal pain  
Orthostatic hypotension Osteoarthritis Osteomyelitis  
Osteoporosis Otitis externa Otitis media Ovarian  
cancer Ovarian disorder Pain Pallor Palpitations  
Pancreatic disorder Pancreatitis necrotising  
Pancytopenia Papilloedema Paraesthesia oralParalysis  
Paranoia Parathyroid disorder Parosmia Pathological  
fracture Pelvic painPenis disorder Peptic ulcer  
Periodontitis Peripheral embolism Peripheral vascular  
disorder Peroneal nerve palsy Personality disorder Petechiae  
Pharyngitis Phlebitis Photophobia Photosensitivity reaction  
Pleural disorder Pleural effusion Pneumonia Pneumonia  
aspiration Pneumothorax Poisoning Pollakiuria Polycythaemia  
Polyuria Proctalgia Prostatic disorder Prostatic  
specific antigen increased Prothrombin level decreased Pruritus  
Pseudomembranous colitis Psoriasis Psychotic disorder  
Pulmonary embolism Pulmonary fibrosis Pulmonary  
function test decreased Pulmonary hypertension Pulmonary oedema  
Pupils unequal Purpura Pyelonephritis Pyuria  
Quadripareisis Rash maculo-papular Rash pustular  
Rectal haemorrhage Rectal tenesmus Red blood cell  
abnormalityRed blood cell sedimentation rate increased Refraction  
disorder Renal failure acute Renal impairment Renal pain  
Respiratory depression Respiratory disorder Respiratory



failure      Respiratory tract infection   Retinal artery occlusion  
             Retinal degeneration   Retinal detachment      Retinal disorder  
             Retinal haemorrhage   Retinal oedema   Retinal vascular  
 disorder   Retinal vein thrombosis      Retinitis pigmentosa  
             Retroperitoneal fibrosis      Rhabdomyolysis      Rheumatoid  
 arthritis   Rhinitis      Salivary gland enlargement   Salivary  
 hypersecretion   Salpingitis   Sarcoidosis   Sarcoma      Schizophreniform  
 disorder   Scleritis   Seborrhoeic dermatitis   Sensory loss  
             Sepsis      Shock   Sialoadenitis      Sinus arrest      Sinus  
 bradycardia   Sinusitis   Skin atrophy      Skin cancer   Skin candida  
             Skin discolouration      Skin disorder      Skin exfoliation   Skin  
 hypertrophy   Skin mass   Skin necrosis      Skin odour abnormal   Skin  
 ulcer   Sleep disorder   Smear cervix abnormal   Somnolence   Speech  
 disorder   Splenomegaly      Sputum increased   Stevens-Johnson  
 syndrome   Stomatitis   Strabismus   Stupor      Subarachnoid  
 haemorrhage   Subcutaneous nodule      Sudden death      Suicide attempt  
             Supraventricular extrasystoles      Supraventricular tachycardia  
             Syncope      Systemic lupus erythematosus   Tachycardia   Tenderness  
             Tendon disorder   Tenosynovitis      Tension      Therapeutic  
 response   unexpected      Thinking abnormal   Thirst      Thrombocytopenia  
             Thrombocytopenic purpura      Thrombocytosis      Thrombophlebitis  
             Thrombosis   Thyroid cancer      Thyroid disorder   Thyroid neoplasm  
             Thyroiditis   Tinnitus      Tongue discolouration   Tongue disorder  
             Tongue oedema      Tooth abscess      Tooth disorder      Tooth  
 impacted   Torticollis   Toxic epidermal necrolysis   Tremor  
             Trismus      Ulcer haemorrhage   Ulcerative keratitis   Unevaluable  
 event   Unintended pregnancy   Upper respiratory tract infection  
             Urethral disorder   Urethral pain      Urethritis   Urinary  
 incontinence      Urinary retention   Urinary tract disorder   Urinary  
 tract infection   Urine abnormality   Urine analysis abnormal      Urine  
 output increased   Urogenital disorder      Urticaria   Uterine disorder  
             Uterine haemorrhage      Uterine leiomyoma   Uterovaginal prolapse  
             Uveitis      VIIIth nerve paralysis   Vaginal haemorrhage  
             Vaginal infection   Vaginal inflammation   Varicose vein  
             Vascular anomaly   Vascular headache   Vascular purpura   Vasculitis  
             Vasodilation procedure   Venous thrombosis   Ventricular arrhythmia  
             Ventricular extrasystoles      Ventricular fibrillation  
             Ventricular tachycardia      Vertigo      Vestibular disorder  
             Viral infection   Virilism      Vision blurred      Visual acuity  
 reduced      Visual impairment   Vitreous disorder   Vomiting  
             Vulvovaginal candidiasis      Vulvovaginal disorder  
             Vulvovaginal mycotic infection      Weight decreased   Weight  
 increased   Withdrawal syndrome      Yawning

\*\*\*\*\*  
 \*\*\*\*\*

T-cell receptor alpha chain C region - Group: Receptor

Treated with:

3-indolebutyric acid: experimental      small molecule      (0  
 associated side effects)

known side effects mediated through drugs targeting this protein:

\*\*\*\*\*  
 \*\*\*\*\*

Outer membrane porin C - Group: Channel

Treated with:  
n-octyl-2-hydroxyethyl sulfoxide: experimental small molecule  
(0 associated side effects)  
(hydroxyethyloxy)tri(ethyloxy)octane: experimental small  
molecule (0 associated side effects)

known side effects mediated through drugs targeting this protein:

\*\*\*\*\*  
\*\*\*\*\*

Succinate dehydrogenase hydrophobic membrane anchor subunit - Group: Enzyme

Treated with:  
atpenin a5: experimental small molecule (0 associated side effects)  
2-[1-methylhexyl]-4,6-dinitrophenol: experimental small molecule (0 associated side effects)  
ubiquinone-2: experimental small molecule (0 associated side effects)

known side effects mediated through drugs targeting this protein:

\*\*\*\*\*  
\*\*\*\*\*

Fe(3+)-pyochelin receptor - Group: Transporter

Treated with:  
lauryl dimethylamine-n-oxide: experimental small molecule  
(0 associated side effects)

known side effects mediated through drugs targeting this protein:

\*\*\*\*\*  
\*\*\*\*\*

Sodium channel protein type 2 subunit alpha - Group: Channel

Treated with:  
lamotrigine: approved small molecule (324 associated side effects) For the adjunctive treatment of partial seizures in epilepsy and generalized seizures of Lennox-Gastaut syndrome. Also for the maintenance treatment of bipolar I disorder and depression.  
propofol: approved small molecule (163 associated side effects) Used for induction and/or maintenance of anaesthesia and for management of refractory status epilepticus.  
zonisamide: approved small molecule (190 associated side effects) For use as adjunctive treatment of partial seizures in adults with epilepsy.  
fospropofol: approved small molecule (0 associated side effects) Used for induction and/or maintenance of anaesthesia and for management of refractory status epilepticus.

437 known side effects mediated through drugs targeting this protein:

Abdominal distension Abdominal pain Abnormal dreams Abscess  
Accommodation disorder Acidosis Acne Acute coronary  
syndrome Affect lability Affective disorder Ageusia  
Agitation Agranulocytosis Akathisia Alanine

aminotransferase increased Albuminuria Alcohol intolerance  
 Alopecia Amblyopia Amenorrhoea Amnesia Anaemia  
 Anaemia macrocytic Anaphylactic shock Anaphylactoid  
 reaction Angina pectoris Angioedema Anorgasmia Anxiety  
 Apathy Aphasia Aplasia pure red cell Aplastic anaemia  
 Apnoea Apraxia Arrhythmia Arrhythmia supraventricular  
 Arthralgia Arthritis Arthropathy Aspartate aminotransferase  
 increased Asthenia Asthma Ataxia Atrial fibrillation  
 Atrioventricular block Atrophy Back pain Bladder pain  
 Blindness Blood creatinine increased Blood disorder Blood  
 fibrinogen decreased Blood lactate dehydrogenase increased Blood  
 urea increased Body temperature increased Bradycardia Breast  
 abscess Breast feeding Breast neoplasm Breast pain Breath  
 odour Bronchitis Bronchospasm Bundle branch block Bursitis  
 Calculus bladder Candidiasis Cardiac arrest Cardiac failure  
 Cardiac fibrillation Cardiac output decreased  
 Cardiovascular disorder Cerebellar syndrome  
 Cerebrovascular accident Chest pain Chills Cholangitis  
 Cholecystitis Cholelithiasis Choreoathetosis  
 Coagulopathy Cognitive disorder Colitis Completed  
 suicide Confusional state Conjunctival hyperaemia  
 Conjunctivitis Constipation Conversion disorder  
 Convulsion Coordination abnormal Cough Cystitis Cystitis  
 noninfective Deafness Death Decreased appetite Deep vein  
 thrombosis Deficiency anaemia Dehydration Delirium Delusion  
 Dependence Depersonalisation Depressed level of consciousness  
 Dermatitis bullous Dermatitis contact Dermatitis  
 exfoliative Diarrhoea Diplopia Discomfort Disinhibition  
 Disseminated intravascular coagulation Disturbance in  
 attention Disturbance in sexual arousal Dizziness Drug abuse  
 Drug effect increased Drug withdrawal convulsions Drug  
 withdrawal syndrome Dry eye Dry mouth Dry skin Duodenal  
 ulcer Duodenitis Dysarthria Dysgeusia Dyskinesia Dysmenorrhoea  
 Dyspepsia Dysphagia Dysphoria Dyspnoea Dystonia  
 Dysuria Ear disorder Ear pain Ecchymosis Eczema  
 Ejaculation disorder Electrocardiogram ST segment  
 Electrocardiogram ST segment depression Electrocardiogram  
 abnormal Embolism Encephalopathy Enterocolitis haemorrhagic  
 Enuresis Eosinophilia Epididymitis Epistaxis  
 Erectile dysfunction Eructation Erythema Erythema  
 multiforme Euphoric mood Extrapyrmidal disorder  
 Extrasystoles Eye pain Eyelid ptosis Face oedema  
 Faecal incontinence Fatigue Feeling abnormal Flank pain  
 Flat affect Flatulence Flushing Fungal skin infection Gait  
 disturbance Gastric disorder Gastric ulcer Gastritis  
 Gastroenteritis Gastrointestinal haemorrhage Gastrointestinal  
 pain Gingival bleeding Gingival hyperplasia Gingivitis Glaucoma  
 Glossitis Goitre Grand mal convulsion Gynaecomastia  
 Haematemesis Haematuria Haemoglobin Haemolytic anaemia  
 Haemoptysis Haemorrhage Hallucination Headache Hemiplegia  
 Hepatic function abnormal Hepatitis Hepatomegaly  
 Herpes virus infection Herpes zoster Hiccups Hirsutism  
 Hostility Hot flush Hyperaemia Hyperaesthesia  
 Hyperbilirubinaemia Hyperglycaemia Hyperhidrosis  
 Hyperkalaemia Hyperkinesia Hyperlipidaemia Hyperpathia

Hyperplasia Hyperreflexia Hypersensitivity Hypertension  
Hypertonia Hyperventilation Hypoaesthesia Hypocoagulable  
state Hypoglycaemia Hypokalaemia Hypokinesia Hypomagnesaemia  
Hyponatraemia Hyporeflexia Hypotension Hypothyroidism  
Hypotonia Hypoventilation Hypoxia Ileus Ill-defined  
disorder Immunodeficiency Immunosuppression Incontinence  
Increased appetite Infarction Infection Influenza  
Insomnia Intracranial pressure increased Iritis Iron  
deficiency Iron deficiency anaemia Irritability Ischaemia  
Jaundice Jaundice cholestatic Lacrimal disorder Lacrimation  
increased Laryngospasm Leukocytosis Leukoderma Leukopenia  
Libido decreased Lip swelling Liver function test abnormal  
Loss of consciousness Lymphadenopathy Lymphocytosis  
Malaise Mastitis Melaena Meningitis aseptic  
Menopausal symptoms Menorrhagia Menstrual disorder  
Mental disability Metabolic acidosis Microcytic anaemia  
Micturition disorder Micturition urgency Migraine  
Moaning Mood swings Mouth ulceration Movement disorder  
Multi-organ failure Muscle atrophy Muscle contracture  
Muscle relaxant therapy Muscle rigidity Muscle spasms  
Muscle twitching Muscular weakness Musculoskeletal discomfort  
Musculoskeletal stiffness Myalgia Myocardial infarction  
Myocardial ischaemia Myoclonus Nausea Neck pain  
Neonatal disorder Neoplasm Nervous system disorder  
Nervousness Neuralgia Neuritis Neuropathy peripheral  
Neurosis Neutropenia Nocturia Nodal arrhythmia Nuchal  
rigidity Nystagmus Obstruction Obstructive airways disorder  
Oculogyric crisis Oedema Oedema peripheral Oesophagitis  
Oliguria Opisthotonus Organ failure Orthostatic  
hypotension Oscillopsia Osteoarthritis Pain Pain in extremity  
Palpitations Pancreatic disorder Pancreatitis  
Pancytopenia Panic attack Panic reaction  
Paraesthesia Paraesthesia oral Paralysis Paranoia  
Parosmia Pathological fracture Penis disorder Peptic  
ulcer Personality disorder Petechiae Pharyngitis Phlebitis  
Phobia Photophobia Photosensitivity reaction  
Pneumothorax Pollakiuria Polyuria Pruritus Psychotic  
disorder Pulmonary embolism Pulmonary function test decreased  
Pulmonary oedema Rash maculo-papular Rash pustular  
Rectal haemorrhage Renal failure Renal failure acute  
Renal pain Respiratory acidosis Respiratory arrest  
Respiratory depression Respiratory disorder Respiratory  
failure Rhabdomyolysis Rhinitis Right ventricular failure  
Salivary hypersecretion Scar Scotoma Seborrhoeic  
dermatitis Sepsis Shock Sinusitis Skin discolouration Skin  
ulcer Sleep disorder Sneezing Somnolence Speech disorder  
Status epilepticus Stevens-Johnson syndrome Stomatitis  
Strabismus Stupor Sudden death Suicidal behaviour  
Suicidal ideation Suicide attempt Supraventricular  
extrasystoles Supraventricular tachycardia Swelling Syncope  
Systemic lupus erythematosus Tachycardia Tachypnoea Tendinous  
contracture Tension Thinking abnormal Thirst Thrombocytopenia  
Thrombophlebitis Thrombosis Tic Tinnitus Tongue disorder  
Tongue oedema Tooth disorder Toxic epidermal necrolysis  
Tremor Ulcer Upper airway obstruction Urinary

incontinence Urinary retention Urinary tract infection Urine  
abnormality Urine analysis abnormal Urine output increased  
Urticaria Uterovaginal prolapse Uveitis VIIIth nerve  
paralysis Vaginal infection Vaginal inflammation Vascular  
insufficiency Vasculitis Vasodilation procedure Ventricular  
extrasystoles Ventricular fibrillation Ventricular  
tachycardia Vertigo Vision blurred Visual acuity reduced  
Visual impairment Vomiting Vulvovaginal candidiasis  
Vulvovaginal mycotic infection Weight decreased Weight  
increased Wheezing Yawning

\*\*\*\*\*  
\*\*\*\*\*

#### Beta-3 adrenergic receptor - Group: Receptor

Treated with:

norepinephrine: approved small molecule (22 associated side effects) Mainly used to treat patients in vasodilatory shock states such as septic shock and neurogenic shock and has shown a survival benefit over dopamine. Also used as a vasopressor medication for patients with critical hypotension.

propranolol: approved small molecule (96 associated side effects) For the prophylaxis of migraine.

isoproterenol: approved small molecule (26 associated side effects) For the treatment of mild or transient episodes of heart block that do not require electric shock or pacemaker therapy also used in management of asthma and chronic bronchitis

arbutamine: approved small molecule (0 associated side effects)

Used to elicit acute cardiovascular responses (cardiac stimulant), similar to those produced by exercise, in order to aid in diagnosing the presence or absence of coronary artery disease (CAD) in patients who cannot exercise adequately.

fenoterol: approved small molecule (0 associated side effects)

Fenoterol is used for the treatment of asthma.

ephedra: approved, withdrawn, nutraceutical small molecule (0 associated side effects) Ephedra is widely used by athletes, despite a lack of evidence that it enhances athletic performance. Ephedra has also been used for weight loss.

clenbuterol: approved small molecule (0 associated side effects) Used as a bronchodilator in the treatment of asthma patients.

droxidopa: approved small molecule (0 associated side effects)

For treatment of neurogenic orthostatic hypotension (NOH) associated with various disorders including Multiple System Atrophy, Familial Amyloid Polyneuropathy, hemodialysis induced hypotension and Parkinson's Disease. Also investigated for use/treatment in neurologic disorders, nephropathy, blood (blood forming organ disorders, unspecified), and dizzy/fainting spells.

bopindolol: approved small molecule (0 associated side effects)

For the management of hypertension, edema, ventricular tachycardias, and atrial fibrillation.

bupranolol: approved small molecule (0 associated side effects)

Used to manage hypertension and tachycardia. Also used to treat glaucoma.

125 known side effects mediated through drugs targeting this protein:

Abdominal distension Abdominal pain Abnormal dreams Acidosis  
 Affect lability Aggression Agranulocytosis Alopecia  
 Amnesia Anaphylactic shock Anaphylactoid reaction  
 Angina pectoris Antibody test positive Anxiety Arrhythmia  
 Arterial insufficiency Arterial thrombosis Asthenia  
 Atrioventricular block Blindness Blood pressure increased  
 Blood urea increased Body temperature increased Bradycardia  
 Bronchospasm Cardiac arrest Cardiac disorder Cardiac  
 failure Cardiac failure congestive Cardiac output decreased  
 Catatonia Chest pain Colitis ischaemic Conjunctivitis  
 Constipation Convulsion Coordination abnormal Coronary  
 artery insufficiency Deafness Decreased appetite Depression  
 Dermatitis Dermatitis exfoliative Diarrhoea Disorientation  
 Disturbance in attention Dizziness Dry eye Dyspepsia  
 Dyspnoea Erectile dysfunction Erythema Erythema  
 multiforme Extravasation Fatigue Flatulence Flushing Gait  
 disturbance Gangrene Gastrointestinal pain Growth hormone  
 deficiency Hallucination Headache Hearing impaired  
 Hyperhidrosis Hypersensitivity Hypertension Hypotension  
 Hypovolaemia Hypoxia Injection site reaction  
 Insomnia Lactic acidosis Laryngospasm Lethargy  
 Leukaemia Loss of libido Mesenteric artery thrombosis Mood  
 swings Muscle spasms Nausea Necrosis Nervousness  
 Oculomucocutaneous syndrome Oedema Oropharyngeal  
 discomfort Oropharyngeal pain Orthostatic hypotension Pain  
 Pallor Palpitations Paraesthesia Peripheral  
 coldness Pharyngitis Photophobia Pulmonary oedema Purpura  
 Purpura non-thrombocytopenic Rash Rash erythematous Raynaud's  
 phenomenon Respiratory distress Sinus rhythm Skin ulcer Sleep  
 disorder Somnolence Systemic lupus erythematosus Tachyarrhythmia  
 Talipes Tenderness Tension Thrombocytopenic purpura  
 Thrombosis Tinnitus Toxic epidermal necrolysis Tremor  
 Ulcer Urticaria Vascular purpura Vasoconstriction Vertigo  
 Vision blurred Visual acuity reduced Visual impairment  
 Vomiting

\*\*\*\*\*  
 \*\*\*\*\*

High affinity immunoglobulin epsilon receptor subunit beta - Group:  
 Receptor

Treated with:

omalizumab: approved biotech (0 associated side effects) For  
 treatment of asthma caused by allergies

known side effects mediated through drugs targeting this protein:

\*\*\*\*\*  
 \*\*\*\*\*

Calcium-activated potassium channel subunit beta 2 - Group: Channel  
 Treated with:

miconazole: approved small molecule (33 associated side effects)

For topical application in the treatment of tinea pedis  
 (athlete's foot), tinea cruris, and tinea corporis caused  
 by &lt;i>Trichophyton rubrum&lt;/i>, &lt;i>Trichophyton  
 mentagrophytes&lt;/i>, and &lt;i>Epidermophyton

floccosum</i>, in the treatment of cutaneous candidiasis (moniliasis), and in the treatment of tinea versicolor. (2r,3r,4s,5r)-2-acetamido-3,4-dihydroxy-5-hydroxymethyl-piperidinium: experimental small molecule (0 associated side effects)

33 known side effects mediated through drugs targeting this protein:

Abdominal pain Anaphylactic shock Anaphylactoid reaction  
Angioedema Breast disorder Burning sensation Cardiac disorder  
Dermatitis Dermatitis contact Erythema Gastrointestinal  
pain Genital burning sensation Genital discharge Headache  
Immune system disorder Muscle spasms Nausea Nervous  
system disorder Oedema Pain Pelvic pain Pruritus genital Rash  
Respiratory disorder Respiratory tract infection Upper  
respiratory tract infection Urethral disorder Urinary tract disorder  
Urinary tract infection Urticaria Vaginal discharge  
Vulvovaginal discomfort Vulvovaginal erythema

\*\*\*\*\*  
\*\*\*\*\*

Organic solute transporter subunit alpha - Group: Transporter

Treated with:

conjugated estrogens: approved small molecule (219 associated side effects) For the treatment of moderate to severe vasomotor symptoms associated with the menopause, atrophic vaginitis, osteoporosis, hypoestrogenism due to hypogonadism, castration, primary ovarian failure, breast cancer (for palliation only), and Advanced androgen-dependent carcinoma of the prostate (for palliation only)

digoxin: approved small molecule (56 associated side effects) For the treatment and management of congestive cardiac insufficiency, arrhythmias and heart failure.

dinoprostone: approved small molecule (0 associated side effects) For the termination of pregnancy during the second trimester (from the 12th through the 20th gestational week as calculated from the first day of the last normal menstrual period), as well as for evacuation of the uterine contents in the management of missed abortion or intrauterine fetal death up to 28 weeks of gestational age as calculated from the first day of the last normal menstrual period. Also used in the management of nonmetastatic gestational trophoblastic disease (benign hydatidiform mole). Other indications include improving the cervical inducibility (cervical "ripening") in pregnant women at or near term with a medical or obstetrical need for labor induction, and the management of postpartum hemorrhage.

taurocholic acid: experimental small molecule (0 associated side effects)

257 known side effects mediated through drugs targeting this protein:

5q minus syndrome Abdominal discomfort Abdominal distension  
Abdominal pain Abscess Acne Acute coronary syndrome  
Affect lability Agitation Alopecia Amenorrhoea  
Anaphylactic shock Anaphylactoid reaction Angioedema  
Angiopathy Anxiety Apathy Arrhythmia Arthralgia  
Arthropathy Asthenia Asthma Atrial tachycardia

Atrioventricular block complete    Atrioventricular block first  
 degree    Atrioventricular block second degree    Atrioventricular  
 dissociation    Back pain    Benign neoplasm    Bladder pain  
 Blindness    Blood glucose decreased    Blood glucose  
 increased    Blood pressure increased    Blood triglycerides  
 increased    Body temperature increased    Bone disorder    Bone pain  
 Bradycardia    Breast discharge    Breast discomfort    Breast disorder  
 Breast enlargement    Breast mass    Breast neoplasm    Breast pain  
 Breast swelling    Breast tenderness    Bronchitis    Candidiasis  
 Carbohydrate tolerance decreased    Cardiac arrest    Cardiac  
 disorder    Cardioactive drug level    Cerebrovascular accident  
 Cervical discharge    Cervix disorder    Chest pain    Chills  
 Chloasma    Chorea    Colitis ischaemic    Conduction disorder  
 Confusional state    Conjunctivitis    Connective tissue disorder  
 Constipation    Coronary artery thrombosis    Cough    Cystitis  
 Cystitis noninfective    Death    Decreased appetite    Deep vein  
 thrombosis    Delirium    Depression    Dermatitis    Diarrhoea    Discomfort  
 Dissociation    Dizziness    Drug interaction    Dry eye  
 Dysmenorrhoea    Dyspepsia    Dysplasia    Dyspnoea    Dysuria  
 Ear pain    Ecchymosis    Ectropion of cervix    Electrocardiogram  
 PR prolongation    Electrocardiogram ST segment    Electrocardiogram ST  
 segment depression    Electrocardiogram change    Embolism  
 Embolism venous    Endometrial cancer    Endometrial  
 hypertrophy    Endometriosis    Epilepsy    Erythema    Erythema  
 multifforme    Erythema nodosum    Extrasystoles    Eye disorder  
 Fatigue    Feeling abnormal    Fibrocystic breast disease    Flat  
 affect    Flatulence    Fluid retention    Galactorrhoea    Gallbladder  
 disorder    Gastrointestinal disorder    Gastrointestinal necrosis  
 Gastrointestinal pain    Generalised oedema    Genital discharge  
 Glucose tolerance decreased    Glucose tolerance impaired  
 Gynaecomastia    Haemangioma    Haemoptysis    Haemorrhagic disorder  
 Hallucination    Headache    Hepatic function abnormal  
 Hepatobiliary disease    Hirsutism    Hypercalcaemia  
 Hyperglycaemia    Hyperlipidaemia    Hypernatraemia  
 Hypersensitivity    Hypertension    Hypertonia  
 Hypertriglyceridaemia    Hypertrophy    Hypoaesthesia  
 Hypocalcaemia    Hypotension    Hypothyroidism    Infarction  
 Infection    Influenza    Injection site pain    Insomnia  
 Intestinal ischaemia    Irritability    Ischaemia    Jaundice  
 Jaundice cholestatic    Lacrimal disorder    Lacrimation increased  
 Laryngitis    Leiomyoma    Loss of consciousness    Mass    Meningioma  
 benign    Menorrhagia    Menstrual disorder    Mental disorder  
 Mesenteric vascular insufficiency    Metrorrhagia    Migraine  
 Mood swings    Mouth ulceration    Muscle rigidity    Muscle spasms  
 Musculoskeletal discomfort    Musculoskeletal pain  
 Musculoskeletal stiffness    Myalgia    Myocardial infarction  
 Nausea    Neck pain    Necrosis    Neoplasm    Nervous system  
 disorder    Nervousness    Neuritis    Neuropathy peripheral    Nipple pain  
 Nodule    Nuchal rigidity    Oedema    Oedema peripheral    Optic  
 neuritis    Osteoarthritis    Ovarian cancer    Pain in extremity  
 Palpitations    Pancreatitis    Paraesthesia    Pelvic pain  
 Pharyngitis    Phlebitis    Pigmentation disorder    Poisoning  
 Pollakiuria    Porphyria    Precocious puberty    Pruritus genital  
 Psychotic disorder    Puberty    Pulmonary embolism  
 Pulmonary function test decreased    Purpura    Rash generalised



Rash maculo-papular      Respiratory depression      Respiratory tract  
infection      Rhinitis      Sensory loss      Shock      Sinus bradycardia  
Sinusitis      Smear cervix abnormal      Somnolence      Stomatitis  
Subcutaneous nodule      Swelling      Syncope      Tachycardia  
Tenderness      Tension      Thrombocytopenia      Thrombophlebitis  
superficial Thrombosis      Tooth abscess      Ulcer      Upper respiratory  
tract infection      Urethral disorder      Urinary tract disorder      Urticaria  
Uterine cancer      Uterine cervical erosion      Uterine leiomyoma  
Uterine spasm      Vaginal haemorrhage      Varicose vein  
Vasodilation procedure      Venous thrombosis      Ventricular  
extrasystoles      Ventricular fibrillation      Ventricular  
tachycardia      Vertigo      Visual acuity reduced      Visual impairment  
Vomiting      Vulvovaginal candidiasis      Vulvovaginal mycotic  
infection      Vulvovaginal pruritus      Weight increased      Withdrawal bleed  
Xanthopsia

\*\*\*\*\*  
\*\*\*\*\*

Neuronal acetylcholine receptor subunit alpha-2 - Group: Channel  
Treated with:

nicotine: approved      small molecule      (98 associated side effects)

For the relief of nicotine withdrawal symptoms and as an aid  
to smoking cessation.

carbachol: approved      small molecule      (12 associated side effects)

Primarily used in the treatment of glaucoma, but is also used  
during ophthalmic surgery.

metocurine iodide: approved      small molecule      (0 associated  
side effects)      For use as an anesthesia adjunct to induce skeletal  
muscle relaxation and to reduce the intensity of muscle contractions  
in convulsive therapy.

gallamine triethiodide: approved      small molecule      (0  
associated side effects)      For use as adjuncts to anesthesia to  
induce skeletal muscle relaxation and to facilitate the management  
of patients undergoing mechanical ventilation

dextromethorphan: approved      small molecule      (0 associated side  
effects)      For treatment and relief of dry cough.

cisatracurium besylate: approved      small molecule      (0  
associated side effects)      For inpatients and outpatients as an  
adjunct to general anesthesia, to facilitate tracheal intubation,  
and to provide skeletal muscle relaxation during surgery or  
mechanical ventilation in the ICU.

mecamylamine: approved      small molecule      (29 associated side  
effects)      For the treatment of moderately severe to severe  
essential hypertension and in uncomplicated cases of malignant  
hypertension

galantamine: approved      small molecule      (160 associated side  
effects)      For the treatment of mild to moderate dementia of the  
Alzheimer's type. Has also been investigated in patients with mild  
cognitive impairment who did not meet the diagnostic criteria for  
Alzheimer's disease.

procaine: approved      small molecule      (43 associated side effects)  
Used as a local anesthetic primarily in oral surgery

rocuronium: approved      small molecule      (25 associated side effects)

For inpatients and outpatients as an adjunct to general  
anesthesia to facilitate both rapid sequence and routine tracheal

intubation, and to provide skeletal muscle relaxation during surgery or mechanical ventilation.

biperiden: approved small molecule (13 associated side effects)

For use as an adjunct in the therapy of all forms of parkinsonism and control of extrapyramidal disorders secondary to neuroleptic drug therapy.

doxacurium chloride: approved small molecule (0 associated side effects) Used to provide skeletal muscle relaxation as an adjunct to general anesthesia, for endotracheal intubation or to facilitate mechanical ventilation.

tubocurarine: approved small molecule (0 associated side effects) Used as a diagnosis agent for myasthenia gravis, and also to facilitate the intubation after induction of anesthesia in surgical procedure

mivacurium: approved small molecule (18 associated side effects)

For inpatients and outpatients, as an adjunct to general anesthesia, to facilitate tracheal intubation and to provide skeletal muscle relaxation during surgery or mechanical ventilation.

decamethonium: approved small molecule (0 associated side effects) For use as a skeletal muscle relaxant

pancuronium: approved small molecule (18 associated side effects) Used as a muscle relaxant during anesthesia and surgical procedures.

pipecuronium: approved small molecule (0 associated side effects) Used as a muscle relaxant during anesthesia and surgical procedures.

vecuronium: approved small molecule (19 associated side effects)

Vecuronium is a muscle relaxing agent and is used as an adjunct in general anesthesia.

268 known side effects mediated through drugs targeting this protein:

Abdominal discomfort Abdominal pain Acidosis Acne Affect  
lability Aggression Agitation Amnesia Anaemia  
Anaphylactic shock Anaphylactoid reaction Angioedema  
Anxiety Aortic dissection Apathy Aphasia Apnoea  
Apraxia Arachnoiditis Arrhythmia Arrhythmia  
supraventricular Arthralgia Arthritis Asthenia Asthma  
Ataxia Atrial fibrillation Atrioventricular block  
Atrophy Back pain Bladder pain Blindness Blister  
Blood alkaline phosphatase increased Blood pressure  
fluctuation Blood urea increased Body temperature increased Bone  
pain Bradycardia Bronchitis Bronchospasm Bundle branch block  
Cardiac arrest Cardiac failure Cardiac fibrillation  
Cardiac output decreased Cardiovascular disorder  
Cataract Cerebrovascular accident Cerebrovascular  
disorder Chest discomfort Chest pain Chorea Coagulopathy  
Completed suicide Confusional state Constipation Convulsion  
Coordination abnormal Corneal degeneration Corneal opacity  
Cough Cystitis Cystitis noninfective Decreased appetite  
Dehydration Delirium Dependence Depression Dermatitis  
Dermatitis bullous Diarrhoea Discomfort Disorientation  
Dissociation Disturbance in attention Disturbance in  
sexual arousal Diverticulitis Dizziness Dizziness postural  
Drug abuse Drug dependence Dry mouth Dysgeusia

Dysmenorrhoea    Dyspepsia    Dysphagia    Dysphonia    Dyspnoea  
 Ear pain    Electrocardiogram QT prolonged    Electrocardiogram  
 T wave inversion Electrocardiogram abnormal    Epistaxis    Erectile  
 dysfunction Erythema    Euphoric mood    Eye disorder    Eye  
 irritation Fatigue    Feeling abnormal Fibrosis    Flat affect  
 Flatulence Flushing    Gastric disorder Gastritis  
 Gastroenteritis Gastrointestinal haemorrhage Gastrointestinal  
 pain Glossitis    Gravitational oedema    Haematuria Haemoglobin  
 Haemorrhage Hallucination    Headache    Hepatic enzyme  
 increased Hepatitis    Hepatobiliary disease    Hiccups  
 Hyperglycaemia    Hyperhidrosis    Hyperkinesia  
 Hypersensitivity    Hypersomnia Hypertension    Hypertonia  
 Hypoaesthesia    Hypokalaemia    Hypokinesia Hypotension  
 Hypoxia    Ileus Ill-defined disorder    Immune system disorder  
 Incontinence    Increased appetite    Increased bronchial  
 secretion    Infarction    Infection    Influenza    Injection site  
 reaction    Insomnia    Iritis    Irritability    Ischaemia  
 Keratopathy Lacrimation increased    Laryngeal oedema  
 Laryngospasm    Lethargy    Libido decreased    Libido increased  
 Light anaesthesia Liver disorder    Loss of consciousness    Lower  
 gastrointestinal haemorrhage Malaise    Mean arterial pressure  
 Melaena    Meningism    Menstrual disorder    Mental disability  
 Mental disorder    Migraine    Mood swings    Muscle atrophy  
 Muscle contractions involuntary    Muscle spasms    Muscular  
 weakness    Musculoskeletal discomfort    Musculoskeletal disorder  
 Myalgia    Mydriasis    Myocardial ischaemia    Myopathy    Nasal  
 congestion    Nasal discomfort    Nasal ulcer    Nasopharyngitis    Nausea  
 Nephrolithiasis    Nervous system disorder    Nervousness  
 Neuropathy peripheral    Nightmare    Nocturia    Oedema  
 Oedema peripheral Oesophageal disorder    Oesophageal  
 perforation Orthostatic hypotension    Pain    Pain in extremity Pain  
 in jaw    Palpitations    Paraesthesia    Paralysis    Paranoia  
 Pharyngitis Phlebitis    Pneumonia    Pollakiuria Pruritus  
 Pulmonary function test decreased    Pulmonary oedema    Purpura  
 Rash    Rectal haemorrhage    Renal failure    Respiratory  
 arrest    Respiratory depression    Respiratory disorder    Respiratory  
 failure    Respiratory tract infection    Retinal detachment  
 Rhinitis    Rhinorrhoea Rhonchi    Salivary hypersecretion  
 Sedation    Sensory loss    Shock    Sinusitis    Sleep disorder  
 Sneezing    Somnolence    Sputum increased    Stomatitis    Suicidal  
 ideation    Suicide attempt    Supraventricular tachycardia    Syncope  
 Tachycardia Tension    Thought blocking    Throat irritation  
 Thrombocytopenia    Thrombocytosis    Tinnitus    Tobacco user  
 Tooth disorder    Transient ischaemic attack    Tremor    Ulcer  
 Upper respiratory tract infection    Urethral disorder    Urinary  
 incontinence    Urinary retention    Urinary tract disorder    Urinary  
 tract infection    Urticaria    Vascular dementia    Vascular purpura  
 Vascular resistance pulmonary increased    Vascular resistance  
 systemic    Vasodilation procedure    Ventricular tachycardia  
 Vertigo    Vision blurred    Visual acuity reduced    Visual  
 impairment Vomiting    Weight decreased    Weight increased    Wheezing  
 Withdrawal syndrome

\*\*\*\*\*  
 \*\*\*\*\*

Free fatty acid receptor 1 - Group: Receptor

Treated with:

icosapent: approved,nutraceutical small molecule (0 associated side effects) EPA can be used for lowering elevated triglycerides in those who are hyperglyceridemic. In addition, EPA may play a therapeutic role in patients with cystic fibrosis by reducing disease severity and may play a similar role in type 2 diabetics in slowing the progression of diabetic nephropathy.

known side effects mediated through drugs targeting this protein:

\*\*\*\*\*  
\*\*\*\*\*

Metabotropic glutamate receptor 8 - Group: Receptor

Treated with:

l-glutamic acid: approved,nutraceutical small molecule (0 associated side effects) Considered to be nature's "Brain food" by improving mental capacities; helps speed the healing of ulcers; gives a "lift" from fatigue; helps control alcoholism, schizophrenia and the craving for sugar.

known side effects mediated through drugs targeting this protein:

\*\*\*\*\*  
\*\*\*\*\*

High-affinity cationic amino acid transporter 1 - Group: Transporter

Treated with:

l-lysine: approved,nutraceutical small molecule (0 associated side effects) Supplemental L-lysine has putative anti-herpes simplex virus activity. There is preliminary research suggesting that it may have some anti-osteoporotic activity.

l-arginine: approved,nutraceutical small molecule (20 associated side effects) Used for nutritional supplementation, also for treating dietary shortage or imbalance.

l-ornithine: approved,nutraceutical small molecule (0 associated side effects) Used for nutritional supplementation, also for treating dietary shortage or imbalance. It has been claimed that ornithine improves athletic performance, has anabolic effects, has wound-healing effects, and is immuno-enhancing.

20 known side effects mediated through drugs targeting this protein:

Anaphylactic shock Cyanosis Dermatitis Extravasation  
Flushing Haematuria Headache Hypersensitivity  
Hypoaesthesia Nausea Necrosis Platelet count  
decreased Rash Rash macular Sensory loss Skin exfoliation  
Skin necrosis Surgery Swelling Vomiting

\*\*\*\*\*  
\*\*\*\*\*

Multidrug resistance ABC transporter ATP-binding and permease protein - Group: Transporter

Treated with:

adenosine-5'-diphosphate: experimental small molecule (0 associated side effects)

known side effects mediated through drugs targeting this protein:

\*\*\*\*\*  
\*\*\*\*\*

5-hydroxytryptamine 2B receptor - Group: Receptor

Treated with:

eletriptan: approved small molecule (242 associated side effects) For the acute treatment of migraine with or without aura in adults.

methysergide: approved small molecule (69 associated side effects) For the treatment of vascular headache

cabergoline: approved small molecule (96 associated side effects) For the treatment of hyperprolactinemic disorders, either idiopathic or due to prolactinoma (prolactin-secreting adenomas). May also be used to manage symptoms of Parkinsonian Syndrome as monotherapy during initial symptomatic management or as an adjunct to levodopa therapy during advanced stages of disease.

ropinirole: approved small molecule (631 associated side effects) For the treatment of the signs and symptoms of idiopathic Parkinson's disease. Also used for the treatment of restless legs syndrome.

dihydroergotamine: approved small molecule (128 associated side effects) For the acute treatment of migraine headaches with or without aura and the acute treatment of cluster headache episodes.

pramipexole: approved small molecule (620 associated side effects) For the treatment of signs and symptoms of idiopathic Parkinson's disease

triflupromazine: approved small molecule (0 associated side effects) Used mainly in the management of psychoses. Also used to control nausea and vomiting.

fenfluramine: illicit,withdrawn small molecule (0 associated side effects) For the management of exogenous obesity as a short-term (a few weeks) adjunct in a regimen of weight reduction based on caloric restriction.

lisuride: approved small molecule (0 associated side effects) For the management of Parkinson's Disease

apomorphine: approved small molecule (45 associated side effects) For the acute, intermittent treatment of hypomobility, off episodes (end-of-dose wearing off and unpredictable on/off episodes) associated with advanced Parkinson's disease.

minaprine: approved small molecule (0 associated side effects) For the treatment of depression

tegaserod: withdrawn small molecule (125 associated side effects) Provides relief from the symptoms of irritable bowel syndrome including chronic idiopathic constipation.

doxepin: approved small molecule (210 associated side effects) Labeled indications: depression and insomnia. Unlabeled indications: chronic and neuropathic pain, anxiety, idiopathic urticaria.

pergolide: approved,withdrawn small molecule (354 associated side effects) Indicated as adjunctive treatment to levodopa/carbidopa in the management of the signs and symptoms of Parkinson's disease. It was withdrawn from the US and Canadian markets in 2007 due to an increased risk of cardiac valvulopathy.

bromocriptine: approved small molecule (120 associated side effects) For the treatment of galactorrhea due to

hyperprolactinemia, prolactin-dependent menstrual disorders and infertility, prolactin-secreting adenomas, prolactin-dependent male hypogonadism, as adjunct therapy to surgery or radiotherapy for acromegaly or as monotherapy in special cases, as monotherapy in early Parkinsonian Syndrome or as an adjunct with levodopa in advanced cases with motor complications. Bromocriptine has also been used off-label to treat restless legs syndrome and neuroleptic malignant syndrome.

chlorprothixene: approved small molecule (0 associated side effects) For treatment of psychotic disorders (e.g. schizophrenia) and of acute mania occurring as part of bipolar disorders.

clomipramine: approved small molecule (349 associated side effects)

3,4-methylenedioxymethamphetamine: illicit, experimental small molecule (0 associated side effects) Clinical trials are now testing the therapeutic potential of MDMA for post-traumatic stress disorder (PTSD) and anxiety associated with terminal cancer. MDMA is one of the four most widely used illicit drugs in the U.S.

1041 known side effects mediated through drugs targeting this protein:

5q minus syndrome  
Abdominal adhesions Abdominal discomfort  
Abdominal distension Abdominal neoplasm Abdominal pain  
Abdominal pain lower Abdominal pain upper Abnormal  
behaviour Abnormal dreams Abortion spontaneous Abscess  
Accommodation disorder Acidosis Acne Actinic keratosis Acute  
abdomen Acute coronary syndrome Acute lymphocytic leukaemia  
Acute tonsillitis Adenocarcinoma Adenoma benign Adhesion  
Adjustment disorder Affect lability Ageusia Aggression  
Agitation Agranulocytosis Akathisia Akinesia Alanine  
aminotransferase increased Albright's disease Albuminuria  
Alkalosis Alopecia Altered state of consciousness  
Amaurosis fugax Amblyopia Amenorrhoea Amnesia Amyotrophic  
lateral sclerosis Anaemia Anaemia megaloblastic Aneurysm  
Angina pectoris Angina unstable Angioedema Angiomyolipoma  
Angiopathy Anorectal discomfort Anorectal disorder  
Anxiety Aortic dissection Aortic embolus Apathy  
Aphasia Aphonia Aphthous stomatitis Apnoea  
Appendicitis Application site reaction Apraxia  
Arrhythmia Arrhythmia supraventricular Arterial disorder  
Arterial occlusive disease Arterial stenosis Arteriosclerosis  
Arteriospasm coronary Arteritis Arthralgia Arthritis  
Arthropathy Ascites Aspartate aminotransferase increased  
Aspiration Asthenia Asthma Ataxia Atrial  
fibrillation Atrial flutter Atrial septal defect  
Atrioventricular block Atrioventricular block first degree  
Atrioventricular block second degree Atrophy Aura  
Azotaemia Back pain Bacterial infection Balance disorder  
Balanoposthitis Basal cell carcinoma Benign intracranial  
hypertension Benign neoplasm Benign neoplasm of skin  
Biliary colic Binge eating Bladder cancer Bladder  
disorder Bladder pain Blepharitis Blepharospasm Blindness  
Blindness transient Blister Blood alkaline phosphatase  
increased Blood amylase increased Blood cholesterol increased  
Blood creatine phosphokinase increased Blood electrolytes

abnormal Blood glucose increased Blood iron decreased Blood  
 lactate dehydrogenase increased Blood phosphorus increased Blood  
 pressure increased Blood urea increased Blood uric acid  
 increased Blood urine Blood urine present Body temperature  
 decreased Body temperature increased Bone disorder Bone  
 neoplasm Bone pain Bone sarcoma Bradycardia Bradyphrenia  
 Brain neoplasm Brain neoplasm benign Brain oedema  
 Breast cancer Breast cyst Breast disorder female Breast  
 engorgement Breast enlargement Breast feeding Breast neoplasm  
 Breast pain Breath odour Bronchiolitis Bronchitis  
 Bronchopneumonia Bronchospasm Bruxism Bulimia nervosa  
 Bundle branch block Burning sensation Bursitis Cachexia  
 Calculus bladder Calculus urinary Candidiasis Cardiac arrest  
 Cardiac disorder Cardiac failure Cardiac failure congestive  
 Cardiac fibrillation Cardiac flutter Cardiac murmur  
 Cardiac septal defect Cardiac valve disease Cardiomegaly  
 Cardiovascular disorder Carotid artery occlusion  
 Carpal tunnel syndrome Cataract Catatonia Cellulitis  
 Cerebral artery embolism Cerebral atrophy Cerebral  
 haemorrhage Cerebral infarction Cerebral ischaemia  
 Cerebrospinal fluid rhinorrhoea Cerebrovascular accident  
 Cerebrovascular disorder Cervical dysplasia Cervix  
 carcinoma Cheilitis Chest discomfort Chest pain Chills  
 Chloasma Choking Choking sensation Cholecystitis  
 Cholecystitis chronic Cholelithiasis Chorea  
 Choreoathetosis Chromatopsia Chromaturia Chronic  
 lymphocytic leukaemia Chronic obstructive pulmonary disease  
 Cognitive disorder Cold sweat Colitis ischaemic Colitis  
 ulcerative Colon cancer Colorectal cancer Coma Completed suicide  
 Compulsions Confusional state Congenital anomaly Congenital  
 eye disorder Congenital foot malformation Congenital  
 genitourinary abnormality Conjunctival haemorrhage  
 Conjunctivitis Connective tissue disorder Constipation  
 Conversion disorder Convulsion Coordination abnormal  
 Coronary artery disease Coronary artery occlusion Cough  
 Crocodile tears syndrome Cyanosis Cystitis Cystitis  
 noninfective Cytolytic hepatitis Deafness Death Decreased  
 appetite Deep vein thrombosis Deficiency anaemia Dehydration  
 Delirium Delusion Dementia Dental caries Dependence  
 Depersonalisation Depressed level of consciousness Depressed  
 mood Depression Dermal cyst Dermatitis Dermatitis atopic Dermatitis  
 bullous Dermatitis contact Dermatitis exfoliative Dermatitis  
 infected Dermoid cyst Developmental delay Diabetes mellitus  
 Diaphragmatic hernia Diarrhoea Diplopia Discomfort  
 Disease progression Disorientation Disseminated  
 intravascular coagulation Dissociation Disturbance in  
 attention Disturbance in sexual arousal Diverticulitis  
 Dizziness Dizziness postural Drug abuse Drug dependence  
 Drug hypersensitivity Drug ineffective Drug level increased  
 Drug withdrawal syndrome Dry eye Dry mouth Dry skin  
 Dry throat Duodenal ulcer Duodenal ulcer haemorrhage  
 Duodenitis Dysarthria Dysentery Dysgeusia Dysgraphia  
 Dyskinesia Dysmenorrhoea Dyspepsia Dysphagia Dysphonia  
 Dysplasia Dyspnoea Dyspnoea exertional Dystonia  
 Dysuria Ear disorder Ear infection Ear pain

Ecchymosis Eclampsia Eczema Effusion Ejaculation  
 disorder Ejaculation failure Electrocardiogram QRS complex  
 Electrocardiogram abnormal Electrocardiogram change  
 Electroencephalogram abnormal Electrolyte imbalance  
 Elevated mood Embolism Emotional distress Emphysema  
 Encephalopathy Endocrine disorder Endometrial cancer  
 Endometrial hyperplasia Endometrial neoplasm  
 Endometriosis Enteritis Enuresis Enzyme abnormality  
 Eosinophil count increased Eosinophilia Epicondylitis  
 Epididymitis Epistaxis Erectile dysfunction Eructation  
 Erythema Erythromelalgia Euphoric mood Exophthalmos  
 Exostosis Extrapyrarnidal disorder Extrasystoles Eye  
 allergy Eye disorder Eye haemorrhage Eye infection Eye  
 irritation Eye pain Eyelid oedema Eyelid ptosis Face oedema  
 Faecal incontinence Faeces discoloured Fasciitis  
 Fasting Fat intolerance Fatigue Feeling abnormal  
 Feeling cold Feeling hot Feeling jittery Fibroadenoma of  
 breast Fibrocystic breast disease Fibrosis Flank pain Flat  
 affect Flatulence Fluid overload Fluid retention Flushing  
 Folliculitis Fungal infection Fungal skin infection  
 Furuncle Gait disturbance Galactorrhoea Gallbladder  
 cancer Gallbladder disorder Gangrene Gastric cancer  
 Gastric dilatation Gastric disorder Gastric haemorrhage  
 Gastric pH decreased Gastric polyps Gastric ulcer  
 Gastric ulcer haemorrhage Gastritis Gastritis haemorrhagic  
 Gastroenteritis Gastrointestinal disorder Gastrointestinal  
 haemorrhage Gastrointestinal infection Gastrointestinal neoplasm  
 Gastrointestinal pain Gastrointestinal stromal tumour  
 Gastrooesophageal reflux disease General symptom Generalised  
 oedema Genital candidiasis Genital discharge Gestational  
 hypertension Gingival bleeding Gingival infection Gingival  
 recession Gingivitis Glaucoma Glossitis Glycosuria Goitre  
 Gout Grand mal convulsion Gravitational oedema Groin pain  
 Gynaecomastia Haemangioma Haematemesis Haematochezia  
 Haematoma Haematuria Haemoglobin Haemoglobin decreased  
 Haemoglobinuria Haemoptysis Haemorrhage Haemorrhoids  
 Haemothorax Hallucination Hallucination, auditory  
 Hallucination, visual Head discomfort Headache Hearing  
 impaired Hemianopia Hemiparesis Hemiplegia Hepatic enzyme  
 increased Hepatic function abnormal Hepatic neoplasm malignant  
 Hepatitis Hepatobiliary disease Hepatocellular injury  
 Hepatomegaly Hereditary disorder Hernia Herpes  
 simplex Herpes virus infection Herpes zoster Hiccups  
 Hirsutism Hordeolum Hormone level abnormal Hostility Hot  
 flush Hunger Hydrocephalus Hyperacusis Hyperaemia  
 Hyperaesthesia Hyperbilirubinaemia Hyperchlorhydria  
 Hypercholesterolaemia Hyperglycaemia Hyperhidrosis  
 Hyperkalaemia Hyperkeratosis Hyperkinesia  
 Hyperlipidaemia Hypermagnesaemia Hyperpathia Hyperphagia  
 Hyperphosphataemia Hyperplasia Hyperpyrexia  
 Hyperreflexia Hypersensitivity Hypersexuality Hypersomnia  
 Hypertension Hypertensive crisis Hyperthyroidism  
 Hypertonia Hypertonic bladder Hypertrichosis Hypertrophy  
 Hyperuricaemia Hyperuricosuria Hyperventilation Hypnagogic  
 hallucination Hypoaesthesia Hypoaesthesia oral



Hypocalcaemia      Hypochloraemia      Hypochromic anaemia  
 Hypoglycaemia      Hypogonadism      Hypokalaemia      Hypokinesia  
 Hyponatraemia      Hyporeflexia      Hypotension      Hypothermia  
 Hypothyroidism      Hypotonia      Hypoventilation      Hypovitaminosis  
 Hypovolaemia      Hypoxia      IIIrd nerve paralysis      Ileus      Ileus  
 paralytic      Ill-defined disorder      Illusion      Immune system disorder  
 Impaired healing      Inappropriate antidiuretic hormone secretion  
 Incontinence      Increased appetite      Increased bronchial  
 secretion      Infarction      Infected cyst      Infection      Infection  
 susceptibility increased      Infestation      Inflammation      Influenza  
 Inguinal hernia      Initial insomnia      Inner ear disorder  
 Insomnia      Interstitial lung disease      Intervertebral disc  
 degeneration      Intervertebral disc disorder      Intervertebral disc  
 protrusion      Intervertebral discitis      Intestinal functional  
 disorder      Intestinal ischaemia      Intestinal obstruction  
 Intracranial pressure increased      Iron deficiency      Iron  
 deficiency anaemia      Irritability      Irritable bowel syndrome  
 Ischaemia      Ischaemic hepatitis      Jaundice      Joint effusion  
 Joint range of motion decreased      Joint stiffness      Joint  
 swelling      Keratitis      Keratoconjunctivitis sicca      Laboratory test  
 abnormal      Lacrimal disorder      Lacrimation decreased      Lacrimation  
 increased      Lactose intolerance      Laryngeal cancer      Laryngeal  
 disorder      Laryngeal neoplasm      Laryngeal oedema      Laryngitis  
 Laryngospasm      Left ventricular failure      Leiomyoma  
 Leriche syndrome      Lethargy      Leukaemia      Leukaemoid reaction  
 Leukocytosis      Leukopenia      Libido decreased      Libido increased  
 Lichenoid keratosis      Lip and/or oral cavity cancer      Lip  
 blister      Lip dry      Lipoma      Livedo reticularis      Liver  
 function test abnormal      Liver injury      Lividity      Lobar pneumonia  
 Localised infection      Localised oedema      Loss of consciousness  
 Loss of libido      Lower respiratory tract infection      Lung  
 adenocarcinoma stage I      Lung cancer metastatic      Lung disorder      Lung  
 infiltration      Lung neoplasm malignant      Lymphadenitis  
 Lymphadenopathy      Lymphatic disorder      Lymphocytic leukaemia  
 Lymphocytosis      Lymphoedema      Lymphoma      Lymphopenia      Macular  
 degeneration      Macule      Maculopathy      Major depression      Malaise  
 Malignant melanoma      Mania      Mastitis      Mediastinal disorder  
 Melaena      Melanocytic naevus      Memory impairment      Meningitis  
 Menopausal symptoms      Menopause      Menorrhagia      Menstrual  
 disorder      Mental disability      Mental disorder      Metabolic alkalosis  
 Metastasis      Metastatic neoplasm      Metrorrhagia      Micturition  
 disorder      Middle ear disorder      Middle ear effusion      Middle  
 insomnia      Migraine with aura      Migraine without aura      Mitral  
 valve incompetence      Monarthritits      Monocytosis      Mood swings  
 Motion sickness      Mouth ulceration      Multiple myeloma      Muscle  
 atrophy      Muscle contractions involuntary      Muscle contracture  
 Muscle relaxant therapy      Muscle rigidity      Muscle spasms  
 Muscle tightness      Muscle twitching      Muscular weakness  
 Musculoskeletal discomfort      Musculoskeletal disorder  
 Musculoskeletal pain      Musculoskeletal stiffness      Mutism  
 Myalgia      Mydriasis      Myelitis      Myocardial infarction  
 Myocardial ischaemia      Myoclonus      Myopathy      Myopia  
 Myositis      Nail disorder      Nail infection      Narcolepsy      Nasal  
 congestion      Nasal disorder      Nasal dryness      Nasal polyps  
 Nasopharyngitis      Nausea      Neck pain      Necrosis      Necrosis

ischaemic Neoplasm Neoplasm malignant Neoplasm prostate  
 Neoplasm recurrence Neoplasm skin Nephritis  
 Nephrolithiasis Nephrotic syndrome Nerve root lesion  
 Nervous system disorder Nervousness Neuralgia Neuritis  
 Neurogenic bladder Neuroleptic malignant syndrome  
 Neurological symptom Neuroma Neuropathy peripheral  
 Neurosis Neutropenia Neutrophil count decreased Night  
 blindness Night sweats Nightmare Nocturia Nodal arrhythmia  
 Nodule Nuchal rigidity Nystagmus Obesity Obsessive  
 thoughts Obstruction Obstructive airways disorder Ocular hyperaemia  
 Oculogyric crisis Oedema Oedema peripheral Oesophageal  
 carcinoma Oesophageal disorder Oesophageal spasm Oesophageal  
 stenosis Oesophageal ulcer Oesophagitis Oliguria  
 Onychomycosis Oral candidiasis Oral neoplasm benign  
 Orchitis noninfective Oropharyngeal pain Orthostatic  
 hypotension Osteoarthritis Osteoarthropathy Osteomyelitis  
 Osteonecrosis Osteoporosis Otitis externa Otitis  
 media Ovarian cancer Ovarian cyst Pain Pain in extremity Pain  
 in jaw Pallor Palpitations Pancreatitis acute  
 Pancytopenia Panic attack Panic reaction Papilloma  
 Paraesthesia Paralysis Paranoia Parasomnia Paresis  
 Parkinsonism Paronychia Parosmia Pathological gambling  
 Pelvic inflammatory disease Pelvic pain Penis disorder  
 Peptic ulcer Pericardial effusion Pericarditis  
 constrictive Perineal pain Periodontitis Periorbital  
 oedema Peripheral coldness Peripheral ischaemia Peripheral  
 vascular disorder Peritoneal adhesions Personality disorder  
 Petechiae Pharyngeal disorder Pharyngeal oedema Pharyngitis  
 Phlebitis superficial Phobia Photophobia Photopsia  
 Photosensitivity allergic reaction Photosensitivity reaction  
 Piloerection Plasmacytoma Pleural disorder Pleural  
 effusion Pleural fibrosis Pleurisy Pleuritic pain Pneumonia  
 Pneumonia aspiration Pneumothorax Poliomyelitis  
 Pollakiuria Polyarteritis nodosa Polycythaemia Polymyalgia  
 rheumatica Polyp Polyuria Post procedural infection  
 Postmenopausal haemorrhage Pre-eclampsia Premature  
 ejaculation Premenstrual syndrome Presyncope Priapism Proctalgia  
 Productive cough Prolactinoma Prostate cancer Prostatic  
 adenoma Prostatic disorder Prostatitis Protein urine present  
 Proteinuria Prurigo Pruritus Pruritus genital  
 Pseudolymphoma Psoriasis Psychosomatic disease Psychotic  
 disorder Pulmonary embolism Pulmonary fibrosis Pulmonary  
 hypertension Pulmonary oedema Pupils unequal Purpura  
 Pyelonephritis Pyoderma Pyuria Rales Rash Rash  
 erythematous Rash maculo-papular Rash papular Rash  
 pustular Raynaud's phenomenon Rectal cancer Rectal  
 haemorrhage Rectal tenesmus Red blood cell sedimentation rate  
 increased Reflux oesophagitis Regurgitation Renal artery  
 stenosis Renal colic Renal cyst Renal failure acute Renal  
 impairment Renal neoplasm Renal pain Respiratory alkalosis  
 Respiratory disorder Respiratory distress Respiratory  
 failure Respiratory tract infection Retinal detachment  
 Retinal disorder Retinal vascular disorder Retinitis  
 pigmentosa Retroperitoneal fibrosis Rhabdomyolysis Rheumatoid  
 arthritis Rhinitis Rhinitis allergic Rhinorrhoea Rosacea

Rotator cuff syndrome    Sacroiliitis    Saliva altered  
 Salivary duct obstruction    Salivary gland enlargement  
 Salivary hypersecretion    Salpingitis Sarcoma  
 Schizophreniform disorder    Sciatica    Scleritis    Scotoma  
 Seborrhoeic dermatitis    Seborrhoeic keratosis    Sedation  
 Sensation of foreign body    Sensation of heaviness    Sensory  
 disturbance    Sensory loss    Sepsis    Sexual dysfunction    Shock  
   Sialoadenitis    Sicca syndrome    Sick sinus syndrome    Sinus  
 arrhythmia    Sinus bradycardia    Sinus congestion    Sinus headache    Sinus  
 tachycardia    Sinusitis    Skin burning sensation    Skin cancer    Skin  
 discolouration    Skin disorder    Skin exfoliation    Skin  
 hyperpigmentation    Skin hypertrophy    Skin infection    Skin irritation  
   Skin lesion    Skin mass    Skin odour abnormal    Skin papilloma  
   Skin ulcer    Sleep apnoea syndrome    Sleep attacks    Sleep  
 disorder    Sleep paralysis    Sleep talking    Sluggishness  
   Sneezing    Snoring    Social avoidant behaviour  
   Somnambulism    Somnolence    Speech disorder    Sphincter of Oddi  
 dysfunction    Spinal osteoarthritis    Spine malformation  
   Splenomegaly    Spondylitis    Sputum increased    Squamous cell  
 carcinoma    Status epilepticus    Sticky skin    Stomach dilation  
 procedure    Stomatitis    Strabismus    Stress    Stupor  
   Subarachnoid haemorrhage    Subcutaneous nodule    Subileus  
   Suicidal ideation    Suicide attempt    Superior sagittal sinus  
 thrombosis    Supraventricular extrasystoles    Supraventricular  
 tachycardia    Swelling    Syncope    Synovitis    Systemic lupus  
 erythematosus    Tachycardia    Tachypnoea    Tardive dyskinesia  
   Telangiectasia    Tendonitis    Tenosynovitis    Tension  
   Tension headache    Terminal insomnia    Testicular disorder  
   Testicular swelling    Therapeutic response decreased  
   Therapeutic response increased    Thinking abnormal    Thirst  
   Throat irritation    Throat tightness    Thrombocytopenia  
   Thrombocytosis    Thrombophlebitis    Thrombosis    Thyroid adenoma  
   Thyroid cancer    Thyroid neoplasm    Thyroiditis    Tinnitus  
   Tongue discolouration    Tongue disorder    Tongue oedema  
   Tongue ulceration    Tonsillitis    Tooth abscess    Tooth disorder  
   Tooth infection    Toothache    Torticollis    Tracheobronchitis  
   Transaminases increased    Transient ischaemic attack  
   Tremor    Ulcer    Ulcer haemorrhage    Umbilical hernia    Unevaluable  
 event    Upper respiratory tract infection    Upper-airway cough syndrome  
   Urethral disorder    Urethral pain    Urethritis    Urinary  
 incontinence    Urinary retention    Urinary tract disorder    Urinary  
 tract infection    Urinary tract obstruction    Urine abnormality    Urine  
 analysis abnormal    Urine output increased    Urticaria    Uterine disorder  
   Uterine haemorrhage    Uterine inflammation    Uterine leiomyoma  
   Uterine neoplasm    Uterovaginal prolapse    VIIIth nerve paralysis  
   Vaginal discharge    Vaginal haemorrhage    Vaginal infection  
   Vaginal inflammation    Varicose vein    Vascular headache  
   Vascular insufficiency    Vascular purpura    Vasculitis  
   Vasoconstriction    Vasodilation    Vasoproliferative procedure    Vasospasm    Vein  
 disorder    Venous thrombosis    Ventricular arrhythmia    Ventricular  
 extrasystoles    Ventricular failure    Ventricular fibrillation  
   Ventricular hypertrophy    Ventricular tachycardia  
   Vertigo    Vestibular ataxia    Vestibular disorder    Viral  
 diarrhoea    Viral infection    Vision blurred    Visual acuity reduced  
   Visual impairment    Vitamin B12 deficiency    Vitreous detachment

Vitreous floaters Vocal cord paralysis Vomiting Vulval  
disorder Vulvovaginal candidiasis Vulvovaginal mycotic  
infection Waxy flexibility Weight decreased Weight increased  
Wheezing Withdrawal bleed Withdrawal syndrome Wound  
infection Xerophthalmia Yawning

\*\*\*\*\*  
\*\*\*\*\*

Vesicle-associated membrane protein 2 - Group: Other

Treated with:

botulinum toxin type b: approved biotech (0 associated  
side effects) For the treatment of patients with cervical  
dystonia to reduce the severity of abnormal head position and neck  
pain associated with cervical dystonia.

known side effects mediated through drugs targeting this protein:

\*\*\*\*\*  
\*\*\*\*\*

5-hydroxytryptamine 4 receptor - Group: Receptor

Treated with:

cisapride: approved, withdrawn small molecule (0 associated  
side effects) For the symptomatic treatment of adult patients  
with nocturnal heartburn due to gastroesophageal reflux disease.  
ondansetron: approved small molecule (122 associated side  
effects) For the prevention of nausea and vomiting associated with  
emetogenic cancer chemotherapy, postoperation, and radiation. Also  
used for the treatment of postoperative nausea and vomiting.  
tegaserod: withdrawn small molecule (125 associated side  
effects) Provides relief from the symptoms of irritable bowel  
syndrome including chronic idiopathic constipation.  
metoclopramide: approved small molecule (75 associated side  
effects) For the treatment of gastroesophageal reflux disease  
(GERD). It is also used in treating nausea and vomiting, and to  
increase gastric emptying.  
cinitapride: approved small molecule (0 associated side  
effects) For the treatment of gastrointestinal disorders  
associated with motility disturbances such as gastroesophageal  
reflux disease, non-ulcer dyspepsia and delayed gastric emptying.

241 known side effects mediated through drugs targeting this  
protein:

Abdominal discomfort Abdominal distension Abdominal pain  
Abdominal pain upper Abortion spontaneous Accommodation  
disorder Acute coronary syndrome Affect lability Agitation  
Agranulocytosis Akathisia Alanine aminotransferase increased  
Albuminuria Alopecia Altered state of consciousness  
Amenorrhoea Anaphylactic shock Anaphylactoid reaction  
Angina pectoris Angioedema Angiopathy Anorectal discomfort  
Anxiety Aortic dissection Appendicitis Arrhythmia  
Arthralgia Arthropathy Aspartate aminotransferase increased  
Asthenia Asthma Atrial fibrillation Atrioventricular  
block Atrioventricular block second degree Autonomic nervous  
system imbalance Back pain Blindness Blindness transient  
Blister Body temperature increased Bradycardia  
Bradykinesia Breast cancer Breast disorder

Bronchospasm Bundle branch block Cardiac arrest  
 Cardiac disorder Cardiac failure Cardiac failure congestive  
 Cardiac fibrillation Cardio-respiratory arrest  
 Cardiovascular disorder Chest discomfort Chest pain  
 Chills Cholelithiasis Cogwheel rigidity Colitis ischaemic  
 Completed suicide Confusional state Connective tissue disorder  
 Constipation Convulsion Cyst Death Depression suicidal  
 Dermatitis Dermatitis bullous Diarrhoea Discomfort  
 Disturbance in attention Dizziness Dry mouth Dyskinesia  
 Dysmenorrhoea Dyspepsia Dyspnoea Dystonia Dysuria  
 Elastosis perforans Electrocardiogram QT prolonged  
 Electrocardiogram ST segment Electrocardiogram ST segment  
 depression Electrocardiogram change Eosinophil count increased  
 Erectile dysfunction Eructation Erythema Extrapyrarnidal  
 disorder Eye disorder Face oedema Faecal incontinence  
 Fatigue Feeling abnormal Feeling cold Feeling jittery  
 Flatulence Fluid retention Flushing Foetor hepaticus  
 Fungal infection Galactorrhoea Gastric disorder Gastritis  
 Gastrointestinal disorder Gastrointestinal pain  
 Gastroesophageal reflux disease Genital disorder female  
 Grand mal convulsion Grimacing Gynaecomastia Haemoglobin  
 Haemorrhage Haemorrhoids Hallucination Headache  
 Hepatic failure Hepatic function abnormal Hepatic necrosis  
 Hepatitis Hepatobiliary disease Hepatocellular injury  
 Hiccups Hyperbilirubinaemia Hyperhidrosis  
 Hyperprolactinaemia Hypersensitivity Hypertension  
 Hyperthermia Hypokalaemia Hypotension Hypovolaemia  
 Hypoxia Ill-defined disorder Immune system disorder  
 Incontinence Increased appetite Infarction Infection  
 Infestation Injection site reaction Insomnia Intestinal  
 ischaemia Ischaemia Jaundice Laryngeal oedema Laryngospasm  
 Lethargy Leukopenia Liver disorder Local reaction Loss  
 of consciousness Malaise Mediastinal disorder Menorrhagia  
 Mental disability Mental disorder Methaemoglobinaemia  
 Migraine Mood swings Movement disorder Muscle rigidity  
 Muscle spasms Musculoskeletal discomfort Musculoskeletal  
 disorder Musculoskeletal pain Myalgia Myocardial infarction  
 Myocardial ischaemia Nausea Necrosis Neoplasm  
 Neoplasm malignant Nervous system disorder Nervousness  
 Neuroleptic malignant syndrome Neutropenia Oculogyric crisis  
 Oedema Oedema peripheral Opisthotonus Oropharyngeal  
 pain Osteoarthritis Osteoarthropathy Ovarian cyst Pain Pain  
 in extremity Palpitations Paraesthesia Pharyngitis  
 Pollakiuria Polyp Polyuria Porphyria Proctalgia Protrusion  
 tongue Pruritus Rash Rectal haemorrhage Rectal tenesmus  
 Renal pain Respiratory tract infection Sedation Shock Sinus  
 congestion Sinusitis Sleep disorder Somnolence Sphincter of Oddi  
 dysfunction Stridor Subileus Suicidal ideation Suicide attempt  
 Sulphaemoglobinaemia Supraventricular tachycardia Syncope  
 Tachycardia Tardive dyskinesia Tetanus Torsade de  
 pointes Torticollis Toxic epidermal necrolysis Transaminases  
 increased Tremor Trismus Type I hypersensitivity Upper  
 respiratory tract infection Urethral disorder Urinary retention  
 Urinary tract disorder Urinary tract infection Urine  
 output increased Urticaria Ventricular extrasystoles Ventricular

fibrillation      Ventricular tachycardia      Vertigo      Vision  
blurred      Visual impairmentVomiting  
\*\*\*\*\*  
\*\*\*\*\*

Amiloride-sensitive sodium channel subunit alpha - Group: Channel  
Treated with:

triamterene:      approved      small molecule      (25 associated side effects)  
For the treatment of edema associated with congestive heart failure, cirrhosis of the liver, and the nephrotic syndrome; also in steroid-induced edema, idiopathic edema, and edema due to secondary hyperaldosteronism.

amiloride: approved      small molecule      (85 associated side effects)  
For use as adjunctive treatment with thiazide diuretics or other kaliuretic-diuretic agents in congestive heart failure or hypertension.

98 known side effects mediated through drugs targeting this protein:

Abdominal distension    Abdominal pain    Agitation    Alopecia  
Anaemia      Anaemia megaloblastic    Anaphylactic shock  
Angina pectoris    Aplastic anaemia    Arthralgia    Asthenia  
Atrioventricular block    Atrioventricular block complete  
Azotaemia    Back pain    Bladder pain      Bladder spasm      Blood  
potassium increased      Blood urea increased      Bradycardia    Chest pain  
Coma    Confusional state    Constipation      Cough    Decreased  
appetite    Dehydration    Dermatitis    Diarrhoea    Disturbance in sexual  
arousal      Dizziness    Dry mouth    Dyspepsia    Dyspnoea    Dysuria  
Encephalopathy    Erectile dysfunction    Fatigue      Feeling  
abnormal    Flatulence    Foetor hepaticus    Gastrointestinal haemorrhage  
Gastrointestinal pain    Gynaecomastia      Haemoglobin    Haemorrhage  
Headache    Hepatic encephalopathy    Hepatic function abnormal  
Hepatocellular injury    Hyperkalaemia      Hyperkinesia  
Hypersensitivity    Hypokalaemia      Hyponatraemia    Hypotension  
Insomnia    Intraocular pressure increased      Jaundice  
Libido decreased    Liver disorder      Muscle spasms      Muscular  
weakness    Musculoskeletal discomfort    Nasal congestion    Nausea  
Neck pain    Nephritis    Nephrolithiasis    Nervousness    Neutropenia  
Oral pruritus      Orthostatic hypotension      Pain    Pain in  
extremity    Palpitations      Paraesthesia      Paralysis flaccid  
Peptic ulcer      Photosensitivity reaction      Pollakiuria  
Polyuria    Pruritus      Rash    Renal failure acute      Shock  
Somnolence    Tension      Thirst      Thrombocytopenia    Tinnitus  
Tremor      Tubulointerstitial nephritis    Ulcer    Urine output  
increased    Vertigo      Visual impairmentVomiting

\*\*\*\*\*  
\*\*\*\*\*

ATP-sensitive inward rectifier potassium channel 12 - Group: Channel  
Treated with:

dofetilide: approved      small molecule      (59 associated side effects)  
For the maintenance of normal sinus rhythm (delay in time to recurrence of atrial fibrillation/atrial flutter [AF/AFl]) in patients with atrial fibrillation/atrial flutter of greater than one week duration who have been converted to normal sinus rhythm

59 known side effects mediated through drugs targeting this protein:

Abdominal pain    Acute coronary syndrome    Angina pectoris  
 Angioedema    Anxiety    Arrhythmia supraventricular    Arthralgia  
 Asthenia    Atrioventricular block    Back pain    Bradycardia  
 Bundle branch block    Cardiac arrest    Cardiac disorder  
 Cardiac failure    Cerebral ischaemia    Cerebrovascular  
 accident    Chest pain    Cough    Cytolytic hepatitis    Death    Dermatitis  
 Diarrhoea    Dizziness    Dyspnoea    Gastrointestinal pain  
 Headache    Hepatocellular injury    Hyperhidrosis  
 Hypertension    Infarction    Infection    Influenza    Insomnia  
 Ischaemia    Liver injury    Loss of consciousness    Migraine  
 Musculoskeletal discomfort    Myocardial infarction    Nausea  
 Oedema    Oedema peripheral    Pain    Palpitations  
 Paraesthesia    Paralysis flaccid    Rash    Respiratory tract  
 infection    Shock    Sudden death    Supraventricular tachycardia  
 Syncope    Tachycardia    Torsade de pointes    Urinary tract  
 infection    VIIth nerve paralysis    Ventricular fibrillation  
 Ventricular tachycardia

\*\*\*\*\*  
 \*\*\*\*\*

Muscarinic acetylcholine receptor M3 - Group: Receptor

Treated with:

cevimeline: approved    small molecule    (422 associated side effects)    For the treatment of symptoms of dry mouth in patients with Sj&ouml;gren's Syndrome.

tramadol: approved    small molecule    (490 associated side effects)    Indicated in the treatment of moderate to severe pain. Consider for those prone to constipation or respiratory depression. Tramadol is used to treat postoperative, dental, cancer, and acute musculoskeletal pain and as an adjuvant to NSAID therapy in patients with osteoarthritis.

succinylcholine: approved    small molecule    (27 associated side effects)    Used in surgical procedures where a rapid onset and brief duration of muscle relaxation is needed (includes intubation, endoscopies, and ECT)

ziprasidone: approved    small molecule    (251 associated side effects)    For the treatment of schizophrenia and related psychotic disorders.

disopyramide: approved    small molecule    (85 associated side effects)    For the treatment of documented ventricular arrhythmias, such as sustained ventricular tachycardia, ventricular pre-excitation and cardiac dysrhythmias. It is a Class Ia antiarrhythmic drug.

amitriptyline: approved    small molecule    (109 associated side effects)    For the treatment of depression, chronic pain, irritable bowel syndrome, sleep disorders, diabetic neuropathy, agitation and insomnia, and migraine prophylaxis.

ipratropium bromide: approved    small molecule    (116 associated side effects)    For maintenance treatment of bronchospasm associated with chronic obstructive pulmonary disease, including chronic bronchitis and emphysema.

olanzapine: approved    small molecule    (393 associated side effects)    For the acute and maintenance treatment of schizophrenia and related psychotic disorders, as well as acute treatment of manic or mixed episodes of bipolar 1 disorder. Intramuscular olanzapine is indicated for the rapid control of agitated patients.

metixene: approved small molecule (0 associated side effects)  
Used for the symptomatic treatment of parkinsonism.

terfenadine: approved,withdrawn small molecule (0 associated side effects) For the treatment of allergic rhinitis, hay fever, and allergic skin disorders.

clozapine: approved small molecule (228 associated side effects) For use in patients with treatment-resistant schizophrenia.

trihexyphenidyl: approved small molecule (43 associated side effects) Indicated for the treatment of parkinson's disease and extrapyramidal reactions caused by drugs.

oxyphencyclimine:approved small molecule (0 associated side effects) For the treatment of peptic ulcer disease and the relief of smooth muscle spasms in gastrointestinal disorders.

procyclidine: approved small molecule (0 associated side effects) For the treatment of all forms of Parkinson's Disease, as well as control of extrapyramidal reactions induced by antipsychotic agents.

promazine: approved small molecule (0 associated side effects)  
Used as an adjunct for short term treatment of moderate and severe psychomotor agitation. Also used to treat agitation or restlessness in the elderly.

hyoscyamine: approved small molecule (0 associated side effects) For treatment of bladder spasms, peptic ulcer disease, diverticulitis, colic, irritable bowel syndrome, cystitis, and pancreatitis. Also used to treat certain heart conditions, to control the symptoms of Parkinson's disease and rhinitis.

cyproheptadine: approved small molecule (63 associated side effects) For treatment of perennial and seasonal allergic rhinitis, vasomotor rhinitis, allergic conjunctivitis due to inhalant allergens and foods, mild uncomplicated allergic skin manifestations of urticaria and angioedema, amelioration of allergic reactions to blood or plasma, cold urticaria, dermatographism, and as therapy for anaphylactic reactions adjunctive to epinephrine.

imipramine:approved small molecule (100 associated side effects) For the relief of symptoms of depression and as temporary adjunctive therapy in reducing enuresis in children aged 6 years and older. May also be used to manage panic disorders, with or without agoraphobia, as a second line agent in ADHD, management of eating disorders, for short-term management of acute depressive episodes in bipolar disorder and schizophrenia, and for symptomatic treatment of postherpetic neuralgia.

methylscopolamine: approved small molecule (29 associated side effects) Used as adjunctive therapy for the treatment of peptic ulcer. Also used to treat nausea and vomiting due to motion sickness.

darifenacin: approved small molecule (69 associated side effects) For the treatment of overactive bladder with symptoms of urge urinary incontinence, urgency and frequency.

tridihexethyl: approved small molecule (0 associated side effects) Used as an adjunct in the treatment of peptic ulcer disease and in Acquired nystagmus

anisotropine methylbromide: approved small molecule (0 associated side effects) For use in conjunction with antacids or histamine H<sub>2</sub>-receptor antagonists in the



treatment of peptic ulcer, to reduce further gastric acid secretion and delay gastric emptying.

nortriptyline: approved small molecule (91 associated side effects) For the treatment of depression, chronic pain, irritable bowel syndrome, sleep disorders, diabetic neuropathy, agitation and insomnia, and migraine prophylaxis.

atropine: approved small molecule (161 associated side effects) For the treatment of poisoning by susceptible organophosphorous nerve agents having cholinesterase activity as well as organophosphorous or carbamate insecticides.

nicardipine: approved small molecule (107 associated side effects) Used for the management of patients with chronic stable angina and for the treatment of hypertension.

paroxetine: approved small molecule (505 associated side effects) Labeled indications include: major depressive disorder (MDD), panic disorder with or without agoraphobia, obsessive-compulsive disorder (OCD), social anxiety disorder (social phobia), generalized anxiety disorder (GAD), post-traumatic stress disorder (PTSD), and premenstrual dysphoric disorder (PMDD). Unlabeled indications include: eating disorders, impulse control disorders, vasomotor symptoms of menopause, obsessive-compulsive disorder (OCD) in children, and mild dementia-associated agitation in nonpsychotic individuals.

homatropine methylbromide: approved small molecule (0 associated side effects) Used in conjunction with antacids or histamine H<sub>2</sub>-receptor antagonists in the treatment of peptic ulcers, gastric ulcers and duodenal ulcers, to reduce further gastric acid secretion and delay gastric emptying.

diphekanil methylsulfate: approved small molecule (0 associated side effects) Used in the treatment of peptic ulcer, gastric hyperacidity, and hypermotility in gastritis and pylorospasm, and in the treatment of hyperhidrosis (excessive perspiration).

benzquinamide: approved small molecule (0 associated side effects) Used to prevent and treat nausea and vomiting associated with anesthesia and surgery, administered intramuscularly or intravenously.

propiomazine: approved small molecule (0 associated side effects) Propiomazine is largely used for its antihistaminic sleep inducing effects in treating insomnia.

cryptenamine: approved small molecule (0 associated side effects) For the treatment of hypertension.

tropicamide: approved small molecule (14 associated side effects) Indicated to induce mydriasis (dilation of the pupil) and cycloplegia (paralysis of the ciliary muscle of the eye) in diagnostic procedures, such as measurement of refractive errors and examination of the fundus of the eye.

brompheniramine: approved small molecule (27 associated side effects) For the treatment of the symptoms of the common cold and allergic rhinitis, such as runny nose, itchy eyes, watery eyes, and sneezing.

maprotiline: approved small molecule (0 associated side effects) For treatment of depression, including the depressed phase of bipolar depression, psychotic depression, and involuntional

melancholia, and may also be helpful in treating certain patients suffering severe depressive neurosis.

tolterodine: approved small molecule (51 associated side effects) For the treatment of overactive bladder (with symptoms of urinary frequency, urgency, or urge incontinence).

oxybutynin: approved small molecule (163 associated side effects) For the treatment of overactive bladder.

promethazine: approved small molecule (80 associated side effects) For the treatment of allergic disorders, and nausea/vomiting.

pilocarpine: approved small molecule (207 associated side effects) For the treatment of radiation-induced dry mouth (xerostomia) and symptoms of dry mouth in patients with Sj&ouml;grens syndrome.

doxepin: approved small molecule (210 associated side effects) Labeled indications: depression and insomnia. Unlabeled indications: chronic and neuropathic pain, anxiety, idiopathic urticaria.

desipramine: approved small molecule (120 associated side effects) For relief of symptoms in various depressive syndromes, especially endogenous depression. It has also been used to manage chronic peripheral neuropathic pain, as a second line agent for the management of anxiety disorders (e.g. panic disorder, generalized anxiety disorder), and as a second or third line agent in the ADHD management.

quetiapine: approved small molecule (359 associated side effects) For the treatment of schizophrenia and related psychotic disorders.

mivacurium: approved small molecule (18 associated side effects) For inpatients and outpatients, as an adjunct to general anesthesia, to facilitate tracheal intubation and to provide skeletal muscle relaxation during surgery or mechanical ventilation.

diphenidol: approved small molecule (0 associated side effects) For use in the prevention and symptomatic treatment of peripheral (labyrinthine) vertigo and associated nausea and vomiting that occur in such conditions as Meniere's disease and surgery of the middle and inner ear. Also for the control of nausea and vomiting associated with postoperative states, malignant neoplasms, labyrinthine disturbances, antineoplastic agent therapy, radiation sickness, and infectious diseases.

aripiprazole: approved small molecule (630 associated side effects) For the treatment of schizophrenia and related psychotic disorders.

chlorprothixene: approved small molecule (0 associated side effects) For treatment of psychotic disorders (e.g. schizophrenia) and of acute mania occurring as part of bipolar disorders.

pancuronium: approved small molecule (18 associated side effects) Used as a muscle relaxant during anesthesia and surgical procedures.

pipecuronium: approved small molecule (0 associated side effects) Used as a muscle relaxant during anesthesia and surgical procedures.

methotrimeprazine: approved small molecule (0 associated side effects) For the treatment of psychosis, particular those of schizophrenia, and manic phases of bipolar disorder.

tiotropium: approved small molecule (60 associated side effects)  
Used in the management of chronic obstructive pulmonary disease (COPD).

solifenacin: approved small molecule (56 associated side effects) For the treatment of overactive bladder with symptoms of urge urinary incontinence, urgency, and urinary frequency.

isopropamide: approved small molecule (0 associated side effects) For the treatment of a wide range of gastrointestinal disorders, including such conditions as peptic ulcer, gastritis, hyperchlorhydria, functional diarrhea, irritable or spastic colon, pyloroduodenal irritability, pylorospasm, acute nonspecific gastroenteritis, biliary dyskinesia and chronic cholelithiasis, duodenitis, gastrointestinal spasm; it may also be used to treat genitourinary spasm.

mepenzolate: approved small molecule (30 associated side effects)

fesoterodine: approved small molecule (50 associated side effects) For the treatment of overactive bladder (with symptoms of urinary frequency, urgency, or urge incontinence).

methacholine: approved small molecule (0 associated side effects) It is most commonly used for diagnosing bronchial hyperreactivity, using the bronchial challenge test.

1188 known side effects mediated through drugs targeting this protein:

Abasia Abdominal discomfort Abdominal distension Abdominal pain  
Abdominal pain lower Abdominal pain upper Abdominal tenderness  
Abnormal behaviour Abnormal dreams Abnormal faeces Abscess  
Accommodation disorder Acidosis Acne Acute coronary syndrome  
Acute myocardial infarction Acute psychosis Adenocarcinoma  
Adjustment disorder Affect lability Ageusia Aggression Agitation  
Agoraphobia Agranulocytosis Akathisia Akinesia Alanine aminotransferase decreased  
Alanine aminotransferase increased Albuminuria Alcohol abuse Alcohol intolerance  
Alkalosis Alopecia Altered state of consciousness Alveolitis allergic  
Amblyopia Amenorrhoea Amnesia Anaemia Anaemia macrocytic Anaphylactic shock  
Anaphylactoid reaction Aneurysm Anger Angina pectoris Angina unstable  
Angioedema Angiopathy Angle closure glaucoma Anhidrosis Anisocytosis  
Anorectal discomfort Anorectal disorder Anorgasmia Anosmia  
Antinuclear antibody positive Antisocial behaviour Antisocial personality disorder  
Anxiety Aortic aneurysm Aortic dissection Apathy Aphasia  
Aphthous stomatitis Aplasia Aplastic anaemia Apnoea Appendicitis  
Application site reaction Arrhythmia Arrhythmia supraventricular Arteriosclerosis  
Arteritis Arthralgia Arthritis Arthropathy Asocial behaviour Aspartate aminotransferase increased  
Asphyxia Aspiration Assisted fertilisation Asthenia Asthma Ataxia Atelectasis  
Athetosis Atrial fibrillation Atrial flutter Atrioventricular block first degree  
Atrioventricular dissociation Atrophic vulvovaginitis Atrophy Azoospermia  
Azotaemia Back disorder Back pain Bacterial infection Balance disorder  
Basal cell carcinoma Basophilia Benign breast neoplasm  
Benign prostatic hyperplasia Biliary tract disorder

Bipolar I disorder      Bipolar disorder      Bladder dilatation  
 Bladder discomfort      Bladder neck obstruction      Bladder  
 pain      Bleeding time prolonged      Blepharitis      Blepharospasm  
 Blindness      Blister      Blood alkaline phosphatase increased  
 Blood amylase increased      Blood bilirubin increased      Blood  
 cholesterol increased      Blood creatine phosphokinase increased      Blood  
 creatinine increased      Blood disorder      Blood electrolytes abnormal  
 Blood glucose abnormal      Blood glucose decreased      Blood  
 glucose increased      Blood insulin increased      Blood lactate  
 dehydrogenase increased      Blood potassium abnormal      Blood  
 potassium decreased      Blood potassium increased      Blood pressure  
 abnormal      Blood pressure diastolic decreased      Blood pressure  
 fluctuation      Blood pressure increased      Blood pressure systolic  
 decreased      Blood prolactin increased      Blood sodium increased      Blood  
 triglycerides increased      Blood triglycerides normal      Blood urea  
 increased      Blood uric acid increased      Blood urine      Blood urine  
 present      Blunted affect      Body temperature decreased      Body  
 temperature increased      Bone disorder      Bone pain      Bradycardia  
 Bradykinesia      Bradyphrenia      Brain oedema      Breast  
 atrophy      Breast cancer      Breast cyst      Breast disorder female  
 Breast enlargement      Breast feeding      Breast neoplasm  
 Breast pain      Breath odour      Bronchitis      Bronchopneumopathy  
 Bronchospasm      Bronchospasm paradoxical      Bruxism  
 Buccoglossal syndrome      Bulimia nervosa      Bundle branch block  
 Burning sensation      Bursitis      Cachexia      Calculus urinary  
 Candidiasis      Carbohydrate tolerance decreased      Cardiac arrest  
 Cardiac disorder      Cardiac failure      Cardiac failure congestive  
 Cardiac fibrillation      Cardiac flutter      Cardiac murmur  
 Cardiac output decreased      Cardio-respiratory arrest  
 Cardiomegaly      Cardiomyopathy      Cardiopulmonary failure  
 Cardiovascular disorder      Carpal tunnel syndrome      Cataplexy  
 Cataract      Catatonia      Cells in urine      Cellulitis      Cerebellar  
 syndrome      Cerebral haemorrhage      Cerebral infarction      Cerebral  
 ischaemia      Cerebrovascular accident      Cerebrovascular disorder  
 Cerumen impaction      Cervicitis      Cervix disorder      Change of bowel  
 habit      Chapped lips      Cheilitis      Chest discomfort      Chest pain  
 Chills      Choking      Cholecystitis      Cholelithiasis  
 Cholestasis      Cholinergic syndrome      Chondropathy      Chorea  
 Choreoathetosis      Chronic lymphocytic leukaemia      Chronic  
 obstructive pulmonary disease      Ciliary muscle spasm      Clonus  
 Coccydynia      Cognitive disorder      Cogwheel rigidity      Cold sweat  
 Colitis      Colitis ulcerative      Colonic obstruction      Coma  
 Completed suicide      Condition aggravated      Conduction disorder  
 Confusional state      Congenital eye disorder      Conjunctival  
 disorder      Conjunctival hyperaemia      Conjunctival oedema  
 Conjunctivitis      Connective tissue disorder      Constipation  
 Conversion disorder      Convulsion      Coordination abnormal  
 Corneal lesion      Corneal oedema      Corneal opacity  
 Costochondritis      Cough      Crying      Crystal urine  
 Crystalluria      Cyanosis      Cycloplegia      Cystitis      Cystitis  
 noninfective      Deafness      Death      Decreased appetite      Decubitus  
 ulcer      Deep vein thrombosis      Deficiency anaemia      Dehydration  
 Delirium      Delusion      Dementia      Dental caries      Dependence  
 Depersonalisation      Depressed level of consciousness      Depression  
 Depressive symptom      Derealisation      Dermal cyst      Dermatitis

Dermatitis atopic Dermatitis bullous Dermatitis contact  
 Dermatitis exfoliative Dermoid cyst Diabetes mellitus  
 Diabetic coma Diabetic hyperglycaemic coma Diabetic  
 hyperosmolar coma Diabetic ketoacidosis Diarrhoea Diarrhoea  
 haemorrhagic Diplopia Discomfort Disease progression  
 Disorientation Dissociation Disturbance in attention  
 Disturbance in sexual arousal Diverticulitis  
 Diverticulum Dizziness Dizziness exertional Dizziness  
 postural Drooling Drug abuse Drug dependence Drug eruption  
 Drug ineffective Drug interaction Drug withdrawal syndrome  
 Dry eye Dry mouth Dry skin Dry throat Duodenal ulcer  
 Duodenitis Dysaesthesia Dysarthria Dysgeusia Dyskinesia  
 Dysmenorrhoea Dyspepsia Dysphagia Dysphemia Dysphonia  
 Dysphoria Dyspnoea Dystonia Dysuria Ear congestion  
 Ear discomfort Ear disorder Ear infection Ear pain  
 Ecchymosis Eclampsia Eczema Effusion Ejaculation  
 delayed Ejaculation disorder Elastosis perforans Elderly  
 Electrocardiogram QRS complex Electrocardiogram QT  
 prolonged Electrocardiogram ST segment Electrocardiogram ST segment  
 depression Electrocardiogram ST segment elevation Electrocardiogram  
 T wave inversion Electrocardiogram abnormal Electrocardiogram  
 change Electroencephalogram abnormal Electrolyte imbalance  
 Elevated mood Embolism Emotional disorder Emphysema  
 Encephalopathy Endocrine disorder Endometrial disorder  
 Energy increased Enteritis Enterocolitis Enuresis  
 Eosinophil count increased Eosinophilia Epididymitis  
 Epilepsy Epistaxis Erectile dysfunction Eructation  
 Erysipelas Erythema Erythema multiforme Erythema nodosum  
 Euphoric mood Eustachian tube disorder Exfoliative rash  
 Exophthalmos Exostosis Extensor plantar response  
 Extrapyrimal disorder Extrasystoles Extravasation  
 Eye discharge Eye disorder Eye haemorrhage Eye  
 infection Eye inflammation Eye irritation Eye pain Eyelid  
 disorder Eyelid function disorder Eyelid oedema Eyelid  
 ptosis Face oedema Facial pain Facial paresis Faecal  
 incontinence Faecalith Faecaloma Faeces discoloured  
 Faeces hard Failure to thrive Fasciitis Fasting Fatigue  
 Fear Feeling abnormal Feeling cold Feeling hot Feeling  
 jittery Female sexual dysfunction Fibrocystic breast disease  
 Fibrosis Flank pain Flat affect Flatulence Fluid retention  
 Flushing Folliculitis Food interaction Formication  
 Fungal infection Fungal skin infection Furuncle Gait  
 disturbance Galactorrhoea Gamma-glutamyltransferase increased  
 Gangrene Gastric disorder Gastric pH decreased Gastric  
 ulcer Gastric ulcer haemorrhage Gastritis Gastroenteritis  
 Gastrointestinal disorder Gastrointestinal haemorrhage  
 Gastrointestinal infection Gastrointestinal motility disorder  
 Gastrointestinal pain Gastrointestinal sounds abnormal  
 Gastrointestinal tract irritation Gastrooesophageal reflux  
 disease Generalised oedema Genital candidiasis Genital  
 discharge Genital disorder female Genital disorder male  
 Gigantism Gingival bleeding Gingival hyperplasia Gingival  
 pain Gingival recession Gingivitis Glaucoma Globulins  
 increased Glomerulonephritis membranous Glossitis Glossodynia  
 Glucose tolerance decreased Glucose tolerance impaired

Glycosuria Glycosylated haemoglobin increased Goitre Gout  
 Grand mal convulsion Groin pain Gynaecomastia  
 Haematemesis Haematochezia Haematocrit decreased  
 Haematocrit increased Haematoma Haematuria Haemoglobin  
 decreased Haemoglobin increased Haemoglobinaemia Haemoglobinuria  
 Haemolysis Haemolytic anaemia Haemoptysis Haemorrhage  
 Haemorrhage intracranial Haemorrhagic disorder  
 Haemorrhoids Hair disorder Hallucination  
 Hallucination, auditory Hallucination, visual Halo vision  
 Hangover Head and neck cancer Head discomfort Headache  
 Hearing impaired Heart disease congenital Heart rate  
 irregular Helicobacter infection Hemiparesis Hemiplegia Hepatic  
 enzyme increased Hepatic failure Hepatic function abnormal  
 Hepatic necrosis Hepatic steatosis Hepatitis Hepatitis viral  
 Hepatobiliary disease Hepatomegaly Hepatosplenomegaly  
 Hernia Herpes simplex Herpes virus infection Herpes  
 zoster Hiccups High density lipoprotein decreased Hirsutism  
 Homicidal ideation Hordeolum Hormone level abnormal  
 Hostility Hot flush Hyperacusis Hyperaemia Hyperaesthesia  
 Hyperbilirubinaemia Hypercalcaemia Hypercalciuria  
 Hyperchloraemia Hyperchlorhydria Hypercholesterolaemia  
 Hyperglycaemia Hyperhidrosis Hyperinsulinism  
 Hyperkalaemia Hyperkeratosis Hyperkinesia  
 Hyperlipidaemia Hypermagnesaemia Hypernatraemia  
 Hyperparathyroidism Hyperpathia Hyperphosphataemia  
 Hyperplasia Hyperprolactinaemia Hyperproteinaemia  
 Hyperpyrexia Hyperreflexia Hypersensitivity Hypersomnia  
 Hypertension Hyperthermia Hyperthermia malignant  
 Hyperthyroidism Hypertonia Hypertonic bladder  
 Hypertriglyceridaemia Hypertrophy Hyperuricaemia  
 Hyperventilation Hyphaema Hypoaesthesia Hypoaesthesia  
 oral Hypocalcaemia Hypochloraemia Hypocholesterolaemia  
 Hypochromic anaemia Hypoglycaemia Hypohidrosis  
 Hypokalaemia Hypokinesia Hypomagnesaemia Hypomania  
 Hypomenorrhoea Hyponatraemia Hypophagia Hypophosphataemia  
 Hypoproteinaemia Hyporeflexia Hypotension Hypothermia  
 Hypothyroidism Hypotonia Hypoventilation Hypoxia  
 Idiopathic thrombocytopenic purpura Ileitis Ileus Ileus  
 paralytic Ill-defined disorder Illusion Immune system disorder  
 Immunoglobulins increased Impaired gastric emptying  
 Inappropriate antidiuretic hormone secretion Incontinence  
 Increased appetite Increased bronchial secretion  
 Induration Infarction Infection Infertility female  
 Infestation Inflammation Influenza Influenza like illness  
 Ingrowing nail Inguinal hernia Injection site mass  
 Injection site pain Injection site phlebitis Injection  
 site reaction Insomnia Intention tremor Intentional self-  
 injury Interstitial lung disease Intestinal functional  
 disorder Intestinal obstruction Intestinal perforation Intraocular  
 pressure increased Iritis Iron deficiency Iron deficiency  
 anaemia Irritability Irritable bowel syndrome Ischaemia  
 Ischaemic stroke Jaundice Jaundice cholestatic Joint  
 contracture Joint crepitation Joint range of motion decreased Joint  
 stiffness Joint swelling Judgement impaired Keratitis  
 Keratoconjunctivitis sicca Ketoacidosis Ketosis

Laboratory test abnormal      Labyrinthitis      Lacrimal disorder  
 Lacrimation decreased      Lacrimation increased      Laryngeal  
 disorder      Laryngitis      Laryngospasm      Left ventricular failure  
 Leiomyoma      Lens disorder      Lenticular opacities      Lenticular  
 pigmentation      Lethargy      Leukaemia      Leukocytosis      Leukoderma  
 Leukopenia      Leukoplakia oral      Libido decreased      Libido increased  
 Lichen planus      Lichenoid keratosis      Light anaesthesia      Lip  
 blister      Lip dry      Liver disorder      Liver function test abnormal  
 Localised infection      Logorrhoea      Loss of consciousness      Loss  
 of libido      Low density lipoprotein increased      Lower respiratory  
 tract infection      Lung adenocarcinoma stage I      Lung disorder  
 Lymphadenitis      Lymphadenopathy      Lymphocyte count abnormal  
 Lymphocyte count decreased      Lymphocyte count increased  
 Lymphocytic leukaemia      Lymphocytosis      Lymphoedema      Lymphopenia  
 Macular hole      Macule      Major depression      Malaise      Male  
 sexual dysfunction      Malignant melanoma      Mammogram abnormal  
 Mania      Masked facies      Mass      Mastitis      Mediastinal disorder  
 Megacolon      Melaena      Memory impairment      Meningitis  
 Menometrorrhagia      Menopausal symptoms      Menopause      Menorrhagia  
 Menstrual disorder      Menstruation irregular      Mental disability  
 Mental disorder      Mental retardation      Mental status changes  
 Metrorrhagia      Microcytic anaemia      Micturition disorder  
 Micturition urgency      Middle ear disorder      Migraine  
 Miosis      Mitral valve incompetence      Mobility decreased  
 Monocyte count increased      Monocytosis      Mood swings      Motion  
 sickness      Mouth haemorrhage      Mouth ulceration      Movement disorder  
 Mucosal inflammation      Mucosal ulceration      Mucous membrane  
 disorder      Multiple sclerosis      Muscle contractions involuntary  
 Muscle contracture      Muscle enzyme increased      Muscle  
 relaxant therapy      Muscle rigidity      Muscle spasms      Muscle spasticity  
 Muscle tightness      Muscle twitching      Muscular weakness  
 Musculoskeletal chest pain      Musculoskeletal discomfort  
 Musculoskeletal disorder      Musculoskeletal pain  
 Musculoskeletal stiffness      Myalgia      Myasthenic syndrome  
 Mydriasis      Myelitis      Myocardial infarction      Myocardial  
 ischaemia      Myocarditis      Myoclonus      Myopathy      Myopia      Myositis  
 Nail discolouration      Nail disorder      Nasal congestion      Nasal  
 discomfort      Nasal disorder      Nasal dryness      Nasal oedema      Nasal  
 polyps      Nasal ulcer      Nasopharyngitis      Nausea      Neck pain  
 Necrosis      Necrosis ischaemic      Negativism      Neoplasm  
 Neoplasm malignant      Nephritis      Nephrolithiasis      Nephrotic  
 syndrome      Nervous system disorder      Nervousness      Neuralgia  
 Neuritis      Neurodermatitis      Neuroleptic malignant syndrome  
 Neuropathy peripheral      Neurosis      Neutropenia      Neutrophil count  
 decreased      Neutrophil count increased      Night blindness      Night  
 sweats      Nightmare      Nocturia      Nodal arrhythmia      Nodal rhythm  
 Normochromic normocytic anaemia      Nuchal rigidity      Nystagmus  
 Obesity      Obsessive thoughts      Obstruction      Obstructive  
 airways disorder      Ocular hyperaemia      Oculogyric crisis      Oedema mouth  
 Oedema peripheral      Oesophageal achalasia      Oesophageal disorder  
 Oesophageal stenosis      Oesophageal ulcer      Oesophagitis  
 Oliguria      Onychomycosis      Open angle glaucoma      Operative  
 haemorrhage      Opisthotonus      Optic neuritis      Oral candidiasis      Oral  
 disorder      Oral pain      Orchitis noninfective      Orgasm abnormal  
 Oropharyngeal discomfort      Oropharyngeal pain

Oropharyngeal spasm      Orthostatic hypotension  
 Osteoarthritis      Osteoarthropathy      Osteomyelitis  
 Osteonecrosis      Osteopenia      Osteoporosis      Otitis externa  
 Otitis media      Ovarian cyst      Ovarian disorder      Pain      Pain  
 in extremity      Pain in jaw      Pallor      Palpitations  
 Pancreatitis      Pancreatitis acute      Pancytopenia      Panic  
 attack      Panic disorder      Panic disorder with agoraphobia      Panic  
 reaction      Papule      Paraesthesia      Paraesthesia oral      Paralysis  
 Paranoia      Parity      Parkinsonian gait      Paronychia      Parosmia  
 Parotid gland enlargement      Parotitis      Pathological fracture  
 Pelvic pain      Peptic ulcer      Pericardial effusion      Pericardial  
 haemorrhage      Pericarditis      Periodontitis      Periorbital oedema  
 Peripheral ischaemia      Peripheral vascular disorder      Peritonitis  
 Personality disorder      Petechiae      Pharyngeal disorder  
 Pharyngeal erythema      Pharyngeal oedema      Pharyngitis      Phlebitis  
 Phlebitis superficial      Phobia      Phonological disorder  
 Photophobia      Photopsia      Photosensitivity reaction  
 Piloerection      Plantar fasciitis      Platelet count decreased  
 Platelet disorder      Pleural disorder      Pleural effusion      Pleurisy  
 Pneumonia      Pneumonia aspiration      Poisoning      Pollakiuria  
 Polycythaemia      Polydipsia      Polyp      Polyuria      Poor peripheral  
 circulation      Porphyria      Post procedural haemorrhage      Postpartum  
 disorder      Pregnancy      Premature baby      Premature delivery  
 Premature ejaculation      Premenstrual syndrome      Pressure of  
 speech      Presyncope      Priapism      Proctalgia      Productive cough  
 Prostate cancer      Prostatic disorder      Prostatitis  
 Prostatomegaly      Protein total decreased      Protein urine  
 present      Proteinuria      Protrusion tongue      Prurigo      Pruritus  
 Pruritus generalised      Pruritus genital      Psoriasis      Psychiatric  
 symptom      Psychomotor retardation      Psychotic disorder  
 Pulmonary congestion      Pulmonary embolism      Pulmonary  
 fibrosis      Pulmonary function test decreased      Pulmonary hypertension  
 Pulmonary oedema      Punctate keratitis      Pupils unequal  
 Purpura      Pyelonephritis      Pyuria      Rales      Rash erythematous  
 Rash generalised      Rash macular      Rash maculo-papular      Rash  
 morbilliform      Rash papular      Rash pustular      Rash  
 scarlatiniform      Rash vesicular      Rectal haemorrhage      Rectal  
 prolapse      Rectal tenesmus      Red blood cell abnormality      Red blood  
 cell count decreased      Red blood cell count increased      Red blood  
 cell sedimentation rate increased      Reflux oesophagitis      Regressive  
 behaviour      Renal failure acute      Renal impairment      Renal pain  
 Reproductive tract disorder      Respiratory alkalosis      Respiratory  
 arrest      Respiratory depression      Respiratory disorder      Respiratory  
 distress      Respiratory failure      Respiratory tract congestion  
 Respiratory tract infection      Respiratory tract infection viral  
 Restless legs syndrome      Retching      Retinal deposits      Retinal  
 detachment      Retinal disorder      Retinal haemorrhage      Rhabdomyolysis  
 Rheumatoid arthritis      Rhinitis      Rhinitis allergic      Rhinitis  
 seasonal      Rhinorrhoea      Rhonchi      Rosacea      Salivary gland  
 enlargement      Salivary gland pain      Salivary hypersecretion  
 Salpingitis      Sarcosinaemia      Scab      Schizoaffective disorder  
 Schizophreniform disorder      Sciatica      Scleral haemorrhage  
 Scleritis      Scleroderma      Scotoma      Seasonal allergy      Seborrhoeic  
 dermatitis      Sedation      Sensation of heaviness      Sensory loss  
 Sepsis      Septic shock      Sexual dysfunction      Shock



Sialoadenitis Sicca syndrome Sinus arrest Sinus  
 arrhythmia Sinus bradycardia Sinus congestion Sinus disorder Sinus  
 headache Sinus tachycardia Sinusitis Skin discolouration Skin  
 disorder Skin exfoliation Skin hypertrophy Skin irritation Skin  
 odour abnormal Skin papilloma Skin ulcer Skin warm Sleep  
 apnoea syndrome Sleep disorder Sleep paralysis Sleep talking  
 Sluggishness Small intestinal obstruction Sneezing  
 Social avoidant behaviour Somnambulism Somnolence  
 Speech disorder Sputum increased Squamous cell carcinoma  
 Status asthmaticus Status epilepticus Stevens-Johnson  
 syndrome Sticky skin Stomatitis Strabismus Strangury Stridor  
 Stupor Subarachnoid haemorrhage Subdural haematoma  
 Sudden death Suicidal ideation Suicide attempt  
 Supraventricular extrasystoles Supraventricular tachycardia  
 Surgery Suspiciousness Swelling Swelling face  
 Swollen tongue Syncope Synovial cyst Synovitis  
 Systemic lupus erythematosus Tachycardia Tachypnoea Tardive  
 dyskinesia Tearfulness Temperature intolerance Tenderness  
 Tendon disorder Tendonitis Tenosynovitis Tension  
 Tension headache Teratogenicity Testicular disorder  
 Testicular pain Testicular swelling Tetany Thinking  
 abnormal Thirst Thought blocking Throat irritation Throat  
 tightness Thrombocytopenia Thrombocytopenic purpura  
 Thrombocytosis Thrombophlebitis Thrombosis Thyroid neoplasm  
 Thyroiditis Tic Tinea pedis Tinnitus Tongue coated  
 Tongue discolouration Tongue disorder Tongue dry Tongue  
 geographic Tongue oedema Tongue paralysis Tongue spasm  
 Tongue ulceration Tonsillar hypertrophy Tooth abscess Tooth  
 disorder Tooth impacted Tooth infection Tooth malformation  
 Toothache Torsade de pointes Torticollis Toxic epidermal  
 necrolysis Tracheal disorder Tracheitis Transaminases increased  
 Transient ischaemic attack Tremor Trismus Tuberculin  
 test positive Tubulointerstitial nephritis Type I  
 hypersensitivity Ulcer haemorrhage Ulcerative keratitis Unintended  
 pregnancy Upper respiratory tract infection Urethral disorder  
 Urethral pain Urethritis Urinary hesitation Urinary  
 incontinence Urinary retention Urinary tract disorder Urinary  
 tract infection Urine abnormality Urine analysis abnormal Urine  
 flow decreased Urine output increased Urogenital disorder  
 Urosepsis Urticaria Uterine disorder Uterine haemorrhage  
 Uterine leiomyoma Uterine neoplasm Uterine spasm  
 Uterovaginal prolapse VIIIth nerve paralysis Vaginal cyst  
 Vaginal discharge Vaginal haemorrhage Vaginal infection  
 Vaginal inflammation Varicose vein Vascular headache  
 Vascular insufficiency Vascular purpura Vasculitis  
 Vasodilation procedure Venous thrombosis Ventricular arrhythmia  
 Ventricular extrasystoles Ventricular failure Ventricular  
 fibrillation Ventricular flutter Ventricular tachycardia  
 Vertigo Viral diarrhoea Viral infection Vision blurred  
 Visual acuity reduced Visual impairment Vitreous detachment  
 Vomiting Vulvovaginal candidiasis Vulvovaginal mycotic  
 infection Vulvovaginal pruritus Vulvovaginitis Water  
 intoxication Weight decreased Weight fluctuation Weight  
 increased Wheezing White blood cell count decreased White blood  
 cell count increased White blood cell disorder White blood cells

urine positive      Withdrawal syndrome      Wound haemorrhageWound  
infection      Xerophthalmia      Xerosis      Yawning  
\*\*\*\*\*  
\*\*\*\*\*

Outer membrane protein F - Group: Channel

Treated with:

(hydroxyethyloxy)tri(ethyloxy)octane:      experimental      small  
molecule      (0 associated side effects)  
n-(6,7,9,10,17,18,20,21-  
octahydrodibenzo[b,k][1,4,7,10,13,16]hexaoxacyclooctadecin-2-  
yl)acetamide:      experimental      small molecule      (0 associated  
side effects)

known side effects mediated through drugs targeting this protein:

\*\*\*\*\*  
\*\*\*\*\*

Outer membrane protein W - Group: Other

Treated with:

lauryl dimethylamine-n-oxide:      experimental      small molecule  
(0 associated side effects)  
(hydroxyethyloxy)tri(ethyloxy)octane:      experimental      small  
molecule      (0 associated side effects)

known side effects mediated through drugs targeting this protein:

\*\*\*\*\*  
\*\*\*\*\*

C-C chemokine receptor type 5 - Group: Receptor

Treated with:

maraviroc: approved      small molecule      (157 associated side  
effects)      For treatment-experienced adult patients infected with  
only CCR5-tropic HIV-1 detectable, who have evidence of viral  
replication and HIV-1 strains resistant to multiple antiretroviral  
agents.

157 known side effects mediated through drugs targeting this  
protein:

Abdominal distension      Abdominal neoplasm      Abdominal pain upper  
Acne      Acute coronary syndrome      Alopecia      Amnesia  
Anaemia      Anal cancer      Angina pectoris      Angina unstable  
Angiopathy      Anogenital warts      Anxiety      Aortic dissection  
Appetite disorder      Arterial disorder      Arterial occlusive disease  
Bacterial infection      Basal cell carcinoma      Benign neoplasm  
of skin      Bile duct cancer      Blood creatine phosphokinase increased  
Body temperature increased      Breast disorder      Bronchitis  
Candidiasis      Cardiac disorder      Cardiac failure acute  
Cerebrovascular accident      Clostridium difficile colitis  
Colitis      Conjunctivitis      Connective tissue disorder  
Constipation      Convulsion      Coronary artery disease  
Coronary artery occlusion      Cough      Cyst      Dementia      Depression  
Dermatitis      Diarrhoea      Diffuse large B-cell lymphoma  
Discomfort      Dizziness postural      Dysaesthesia      Dysthymic  
disorder      Ear disorder      Ear infection      Endocarditis  
Endocrine neoplasm      Endocrine neoplasm malignant      Epilepsy

Erythema Eye disorder Eye infection Fatigue  
 Flatulence Folliculitis Gastrointestinal disorder  
 Gastrointestinal pain HIV infection Headache Hemianopia  
 Hepatic cancer metastatic Hepatic cirrhosis Hepatic enzyme  
 increased Hepatic failure Hepatobiliary disease Herpes virus  
 infection Herpes zoster Hypertension Hypoplastic anaemia  
 Hypotension Infarction Infection Infective myositis  
 Infestation Inflammation Influenza Ischaemia Jaundice  
 Jaundice cholestatic Lipodystrophy acquired Loss of  
 consciousness Lymphoma Mediastinal disorder Meningitis  
 Meningitis viral Mental disorder Metastases to liver  
 Metastasis Musculoskeletal discomfort Myalgia Myocardial  
 infarction Myocardial ischaemia Myositis Nasal congestion  
 Nasopharyngeal cancer Nausea Neoplasm Neoplasm  
 malignant Neoplasm skin Nervous system disorder Neuropathy  
 peripheral Neutropenia Oedema Oesophageal candidiasis  
 Oesophageal carcinoma Oesophageal disorder Orthostatic  
 hypotension Osteonecrosis Otitis media Pain Pancytopenia  
 Paraesthesia Paralysis Parasomnia Pneumonia Polyp  
 Portal vein thrombosis Pruritus Rash generalised Respiration  
 abnormal Respiratory disorder Respiratory tract infection  
 Rhabdomyolysis Rhinitis Scotoma Septic shock Shock  
 Sinusitis Skin cancer Skin papilloma Sleep disorder  
 Squamous cell carcinoma Squamous cell carcinoma of skin  
 Stomatitis Syncope T-cell lymphoma Thrombosis Tinea  
 infection Tongue neoplasm Transaminases increased Tremor  
 Ulcer Upper respiratory tract infection Urethral disorder  
 Urinary tract disorder VIIIth nerve paralysis Varicella  
 Venous thrombosis Viral infection Vomiting Zygomycosis

\*\*\*\*\*  
\*\*\*\*\*

Urokinase plasminogen activator surface receptor - Group: Receptor  
Treated with:

alteplase: approved biotech (0 associated side effects) For  
management of acute myocardial infarction, acute ischemic stroke and  
for lysis of acute pulmonary emboli

urokinase: approved biotech (0 associated side effects)  
Urokinase can be used for the treatment of pulmonary embolism,  
coronary artery thrombosis, IV catheter clearance, and venous and  
arterial blood clots.

reteplase: approved biotech (0 associated side effects) For  
lysis of acute pulmonary emboli, intracoronary emboli and management  
of myocardial infarction

anistreplase: approved biotech (0 associated side effects)  
For lysis of acute pulmonary emboli, intracoronary emboli and  
management of myocardial infarction

tenecteplase: approved biotech (0 associated side effects)  
For treatment of myocardial infarction and lysis of  
intracoronary emboli

known side effects mediated through drugs targeting this protein:

\*\*\*\*\*  
\*\*\*\*\*

Metabotropic glutamate receptor 1 - Group: Receptor

Treated with:

l-glutamic acid: approved, nutraceutical small molecule (0 associated side effects) Considered to be nature's "Brain food" by improving mental capacities; helps speed the healing of ulcers; gives a "lift" from fatigue; helps control alcoholism, schizophrenia and the craving for sugar.

acamprosate: approved small molecule (212 associated side effects) For the maintenance of abstinence from alcohol in patients with alcohol dependence who are abstinent at treatment initiation

4-(1-amino-1-carboxy-ethyl)-benzoic acid: experimental small molecule (0 associated side effects)

212 known side effects mediated through drugs targeting this protein:

Abdominal distension Abdominal pain Abnormal dreams Abscess  
Acne Acute coronary syndrome Agitation Alanine  
aminotransferase increased Alcoholism Alopecia Amblyopia  
Amnesia Anaemia Angina pectoris Anxiety Apathy  
Arterial occlusive disease Arthralgia Arthritis Ascites  
Aspartate aminotransferase increased Asthenia Asthma  
Back pain Blindness Blister Blood alkaline phosphatase  
increased Blood creatinine increased Blood lactate dehydrogenase  
increased Blood uric acid increased Body temperature increased  
Bronchitis Cardiac failure Cardiomyopathy Chest pain  
Chills Cholecystitis Colitis Completed suicide  
Confusional state Constipation Convulsion Cough Deafness  
Death Decreased appetite Deep vein thrombosis  
Depersonalisation Dermatitis Dermatitis bullous Dermatitis  
exfoliative Diabetes mellitus Diarrhoea Diplopia Discomfort  
Disturbance in sexual arousal Dizziness Dry mouth Dry  
skin Duodenal ulcer Dysgeusia Dyspepsia Dysphagia Dyspnoea  
Ecchymosis Eczema Ejaculation disorder Embolism  
Encephalopathy Endophthalmitis Eosinophilia Epistaxis  
Erectile dysfunction Eructation Face oedema Feeling abnormal  
Flat affect Flatulence Gastric disorder Gastric ulcer  
Gastritis Gastroenteritis Gastrointestinal haemorrhage  
Gastrointestinal pain Goitre Gout Haematemesis  
Haematuria Haemoglobin Haemorrhage Hallucination Headache  
Hepatic cirrhosis Hepatic neoplasm malignant Hepatitis  
Hernia Hostility Hyperbilirubinaemia Hyperglycaemia  
Hyperhidrosis Hyperkinesia Hypersensitivity  
Hypertension Hyperuricaemia Hypoaesthesia  
Hyponatraemia Hypotension Hypothyroidism Hypovitaminosis  
Ill-defined disorder Incontinence Increased appetite  
Infarction Infection Influenza Insomnia Laryngospasm  
Leukopenia Libido decreased Libido increased Liver function  
test abnormal Loss of consciousness Lymphadenopathy  
Lymphocytosis Malaise Mania Melaena Menorrhagia  
Mental disability Mesenteric occlusion Metrorrhagia  
Micturition urgency Migraine Monocytosis Mouth ulceration  
Muscle spasms Muscle twitching Musculoskeletal discomfort  
Myalgia Myocardial infarction Myopathy Nausea Neck  
pain Neoplasm malignant Nephrolithiasis Nervousness Neuralgia  
Neurosis Nocturia Oedema Oedema peripheral

Oesophagitis      Orthostatic hypotension      Pain  
 Palpitations      Pancreatitis      Panophthalmitis  
 Paraesthesia      Paranoia      Pharyngitis Phlebitis      Photophobia  
 Photosensitivity reaction      Pneumonia      Pollakiuria Polyuria  
 Pruritus      Psoriasis      Psychotic disorder      Pulmonary  
 embolism      Rash      Rash maculo-papular      Rash pustular      Rectal  
 haemorrhage      Renal failure      Renal failure acute      Rheumatoid  
 arthritis      Rhinitis      Salivary hypersecretion      Sexual  
 dysfunction      Shock      Somnolence      Stomatitis      Sudden death      Suicidal  
 ideation      Suicide attempt      Syncope      Tachycardia      Tension  
 Thinking abnormal      Thirst      Thrombocytopenia      Thrombophlebitis  
 Tinnitus      Torticollis      Tremor      Ulcer      Urinary incontinence  
 Urinary tract infection      Urine output increased      Urticaria  
 Vaginal infection      Vaginal inflammation      Varicose vein  
 Vasodilation procedure      Vertigo      Visual acuity reduced  
 Visual impairment      Vomiting      Weight decreased      Weight increased  
 Withdrawal syndrome

\*\*\*\*\*  
 \*\*\*\*\*

Oligopeptide transporter, small intestine isoform - Group:

Transporter

Treated with:

ramipril: approved      small molecule      (147 associated side effects)      For the management of mild to severe hypertension. May be used to reduce cardiovascular mortality following myocardial infarction in hemodynamically stable individuals who develop clinical signs of congestive heart failure within a few days following myocardial infarction. To reduce the rate of death, myocardial infarction and stroke in individuals at high risk of cardiovascular events. May be used to slow the progression of renal disease in individuals with hypertension, diabetes mellitus and microalbuminuria or overt nephropathy.

oseltamivir: approved      small molecule      (77 associated side effects)      Oseltamivir (Tamiflu) is for the treatment of uncomplicated acute illness due to influenza infection in patients 1 year and older who have been symptomatic for no more than 2 days. It is also used for the prophylaxis of influenza in adult patients and adolescents 13 years and older.

cefmetazole: approved      small molecule      (0 associated side effects)      For the treatment of infections caused by susceptible organisms.

ampicillin: approved      small molecule      (30 associated side effects)      For treatment of infection (Respiratory, GI, UTI and meningitis) due to E. coli, P. mirabilis, enterococci, Shigella, S. typhosa and other Salmonella, nonpenicillinase-producing N. gonorrhoeae, H. influenzae, staphylococci, streptococci including streptoc

ceftazidime: approved      small molecule      (71 associated side effects)      For the treatment of patients with infections caused by susceptible strains of organisms in the following diseases: lower respiratory tract infections, skin and skin structure infections, urinary tract infections, bacterial septicemia, bone and joint infections, gynecologic infections, intra abdominal infections (including peritonitis), and central nervous system infections (including meningitis).

loracarbef: approved small molecule (0 associated side effects)

Used to treat upper respiratory tract bacterial infections, chronic bronchitis, pneumonia, sinusitis, pharyngitis and tonsillitis, skin abscesses, urinary tract infections and pyelonephritis caused by *E. coli*, *S. pyogenes*, *S. aureus*, *S. saprophyticus*, *S. pneumoniae*, *H. influenzae*; and *M. catarrhalis*.

cefalotin: approved small molecule (0 associated side effects)

Used to prevent infection during surgery and to treat many kinds of infections of the blood, bone or joints, respiratory tract, skin, and urinary tract.

dicloxacillin: approved small molecule (66 associated side effects) Used to treat infections caused by penicillinase-producing staphylococci which have demonstrated susceptibility to the drug.

fosinopril: approved small molecule (155 associated side effects) For treating mild to moderate hypertension, use as an adjunct in treating congestive heart failure, and may be used to slow the rate of progression of renal disease in hypertensive individuals with diabetes mellitus and microalbuminuria or overt nephropathy.

cefotaxime: approved small molecule (55 associated side effects)

Used to treat gonorrhoea, meningitis, and severe infections including infections of the kidney (pyelonephritis) and urinary system. Also used before an operation to prevent infection after surgery.

trandolapril: approved small molecule (172 associated side effects) For the treatment of mild to moderate hypertension, as an adjunct in the treatment of congestive heart failure (CHF), to improve survival following myocardial infarction (MI) in individuals who are hemodynamically stable and demonstrate symptoms of left ventricular systolic dysfunction or signs of CHF within a few days following acute MI, and to slow progression of renal disease in hypertensive patients with diabetes mellitus and microalbuminuria or overt nephropathy.

cefdinir: approved small molecule (109 associated side effects) For the treatment of the respiratory, skin, soft tissue, and ENT infections caused by *H. influenzae*;

(including b-lactamase producing strains), *H. parainfluenzae* (including b-lactamase producing strains), *S. pneumoniae* (penicillin-susceptible strains), *S. pyogenes*, *S. aureus* (including b-lactamase producing strains), and *M. catarrhalis*.

benazepril: approved small molecule (103 associated side effects) For the treatment of hypertension. It may be used alone or in combination with thiazide diuretics.

cephalexin: approved small molecule (65 associated side effects)

For the treatment of respiratory tract infections caused by *Streptococcus pneumoniae* and *Streptococcus pyogenes*; otitis media due to *Streptococcus pneumoniae*, *Haemophilus influenzae*, *Staphylococcus aureus*,

<i>Streptococcus pyogenes</i>, and <i>Moraxella catarrhalis</i>; skin and skin structure infections caused by <i>Staphylococcus aureus</i> and/or <i>Streptococcus pyogenes</i>; bone infections caused by <i>Staphylococcus aureus</i> and/or <i>Proteus mirabilis</i>; genitourinary tract infections, including acute prostatitis, caused by <i>Escherichia coli</i>, <i>Proteus mirabilis</i>, and <i>Klebsiella pneumoniae</i>.

valaciclovir: approved small molecule (0 associated side effects) For the treatment or suppression of cold sores (herpes labialis), herpes zoster (shingles), genital herpes in immunocompetent individuals, and recurrent genital herpes in HIV-infected individuals.

enalapril: approved small molecule (0 associated side effects) For the treatment of essential or renovascular hypertension and symptomatic congestive heart failure. It may be used alone or in combination with thiazide diuretics.

cefixime: approved small molecule (55 associated side effects)

For use in the treatment of the following infections when caused by susceptible strains of the designated microorganisms: (1) uncomplicated urinary tract infections caused by <i>Escherichia coli</i> and <i>Proteus mirabilis</i>; (2) otitis media caused by <i>Haemophilus influenzae</i> (beta-lactamase positive and negative strains), <i>Moraxella catarrhalis</i> (most of which are beta-lactamase positive), and <i>S. pyogenes</i>; (3) pharyngitis and tonsillitis caused by <i>S. pyogenes</i>; (4) acute bronchitis and acute exacerbations of chronic bronchitis caused by <i>Streptococcus pneumoniae</i> and <i>Haemophilus influenzae</i> (beta-lactamase positive and negative strains), and (5) uncomplicated gonorrhea (cervical/urethral) caused by <i>Neisseria gonorrhoeae</i> (penicillinase- and non-penicillinase-producing strains).

chlorpropamide: approved small molecule (33 associated side effects) For treatment of NIDDM in conjunction with diet and exercise.

moexipril: approved small molecule (74 associated side effects) For the treatment of hypertension.

lisinopril: approved small molecule (0 associated side effects) For the treatment of hypertension and symptomatic congestive heart failure. May be used in conjunction with thrombolytic agents, aspirin and/or &beta;-blockers to improve survival in hemodynamically stable individuals following myocardial infarction. May be used to slow the progression of renal disease in hypertensive patients with diabetes mellitus and microalbuminuria or overt nephropathy.

nateglinide: approved small molecule (32 associated side effects) For the treatment of non-insulin dependent-diabetes mellitus in conjunction with diet and exercise.

perindopril: approved small molecule (187 associated side effects) For the treatment of mild to moderate essential hypertension, mild to moderate congestive heart failure, and to

reduce the cardiovascular risk of individuals with hypertension or post-myocardial infarction and stable coronary disease.

cefaclor: approved small molecule (132 associated side effects) For the treatment of certain infections caused by bacteria such as pneumonia and ear, lung, skin, throat, and urinary tract infections.

aminolevulinic acid: approved small molecule (30 associated side effects) Aminolevulinic acid plus blue light illumination using a blue light photodynamic therapy illuminator is indicated for the treatment of minimally to moderately thick actinic keratoses of the face or scalp.

quinapril: approved small molecule (123 associated side effects) For the treatment of hypertension and as adjunct therapy in the treatment of congestive heart failure. May also be used to slow the rate of progression of renal disease in hypertensive individuals with diabetes mellitus and microalbuminuria or overt nephropathy.

methylodopa: approved small molecule (67 associated side effects) For use in the treatment of hypertension.

cyclacillin: approved small molecule (0 associated side effects) For the treatment of bacterial infections caused by susceptible organisms.

glyburide: approved small molecule (52 associated side effects) Indicated as an adjunct to diet to lower the blood glucose in patients with NIDDM whose hyperglycemia cannot be satisfactorily controlled by diet alone.

penicillin g: approved small molecule (0 associated side effects) For use in the treatment of severe infections caused by penicillin G-susceptible microorganisms when rapid and high penicillin levels are required such as in the treatment of septicemia, meningitis, pericarditis, endocarditis and severe pneumonia.

amoxicillin: approved small molecule (66 associated side effects) For the treatment of infections of the ear, nose, and throat, the genitourinary tract, the skin and skin structure, and the lower respiratory tract due to susceptible (only b-lactamase-negative) strains of *Streptococcus* spp. (a- and b-hemolytic strains only), *S. pneumoniae*, *Staphylococcus* spp., *H. influenzae*, *E. coli*, *P. mirabilis*, or *E. faecalis*. Also for the treatment of acute, uncomplicated gonorrhea (ano-genital and urethral infections) due to *N. gonorrhoeae* (males and females).

cefuroxime: approved small molecule (107 associated side effects) For the treatment of many different types of bacterial infections such as bronchitis, sinusitis, tonsillitis, ear infections, skin infections, gonorrhea, and urinary tract infections.

tolbutamide: approved small molecule (0 associated side effects) For treatment of NIDDM (non-insulin-dependent diabetes mellitus) in conjunction with diet and exercise.

cefadroxil: approved small molecule (63 associated side effects) For the treatment of the following infections (skin, UTI, ENT) caused by; *S. pneumoniae*, *H. influenzae*, staphylococci, *S.*



pyogenes (group A beta-hemolytic streptococci),  
&E. coli, P. mirabilis, Klebsiella sp, coagulase-  
negative staphylococci and Streptococcus pyogenes;  
captopril: approved small molecule (112 associated side  
effects) For the treatment of essential or renovascular  
hypertension (usually administered with other drugs, particularly  
thiazide diuretics). May be used to treat congestive heart failure  
in combination with other drugs (e.g. cardiac glycosides, diuretics,  
&beta;-adrenergic blockers). May improve survival in patients  
with left ventricular dysfunction following myocardial infarction.  
May be used to treat nephropathy, including diabetic nephropathy.  
ceftriaxone: approved small molecule (95 associated side  
effects) For the treatment of the infections (respiratory, skin,  
soft tissue, UTI, ENT) caused by S. pneumoniae, H. influenzae,  
staphylococci, S. pyogenes (group A beta-hemolytic streptococci), E.  
coli, P. mirabilis, Klebsiella sp, coagulase-negative staph  
levodopa: approved small molecule (0 associated side effects)  
For the treatment of idiopathic Parkinson's disease (Paralysis  
Agitans), postencephalitic parkinsonism, symptomatic parkinsonism  
which may follow injury to the nervous system by carbon monoxide  
intoxication, and manganese intoxication.  
ceftizoxime: approved small molecule (43 associated side  
effects) For the treatment of infections due to susceptible  
strains of microorganisms.  
cefradine: approved small molecule (0 associated side effects)  
cilazapril: approved small molecule (146 associated side  
effects) Cilazapril is an ACE inhibitor class drug used in the  
treatment of hypertension and heart failure.  
spirapril: approved small molecule (0 associated side effects)  
Spirapril is an ACE inhibitor class drug used to treat  
hypertension.  
cefepime: approved small molecule (73 associated side effects)  
For the treatment of pneumonia (moderate to severe) caused by  
&Streptococcus pneumoniae, including cases  
associated with concurrent bacteremia, &Pseudomonas  
aeruginosa, &Klebsiella pneumoniae, or  
&Enterobacter species. Also for empiric treatment  
of febrile neutropenic patients and uncomplicated and complicated  
urinary tract infections (including pyelonephritis) caused by  
&Escherichia coli or &Klebsiella  
pneumoniae, when the infection is severe, or caused by  
&Escherichia coli, &Klebsiella  
pneumoniae, or &Proteus mirabilis, when  
the infection is mild to moderate, including cases associated with  
concurrent bacteremia with these microorganisms. Also for the  
treatment of uncomplicated skin and skin structure infections caused  
by &Staphylococcus aureus (methicillin-susceptible  
strains only) or &Streptococcus pyogenes; and  
complicated intra-abdominal infections (used in combination with  
metronidazole) caused by &Escherichia coli,  
viridans group streptococci, &Pseudomonas  
aeruginosa, &Klebsiella pneumoniae,  
&Enterobacter species, or &Bacteroides  
fragilis.

ceftibuten: approved small molecule (0 associated side effects)  
Used to treat acute bacterial exacerbations of chronic  
bronchitis (ABECB), acute bacterial otitis media, pharyngitis, and  
tonsillitis.

bestatin: experimental small molecule (0 associated side  
effects)

azidocillin: approved small molecule (0 associated side  
effects) For treatment of infection (Respiratory, GI, UTI and  
meningitis) due to E. coli, P. mirabilis, enterococci, Shigella, S.  
typhosa and other Salmonella, nonpenicillinase-producing N.  
gonorrhoeae, H. influenzae, staphylococci, streptococci including  
streptoc

577 known side effects mediated through drugs targeting this  
protein:

Abdominal discomfort Abdominal distension Abdominal pain  
Abdominal pain upper Abnormal behaviour Abnormal dreams  
Abnormal faeces Abscess Acne Acute coronary syndrome  
Acute generalised exanthematous pustulosis Acute hepatic  
failure Acute respiratory failure Acute tonsillitis Affect  
lability Ageusia Agitation Agranulocytosis Alanine  
aminotransferase increased Alopecia Alveolitis allergic  
Amblyopia Amenorrhoea Amnesia Anaemia Anaemia  
haemolytic autoimmune Anal pruritus Anaphylactic shock  
Anaphylactoid reaction Angina pectoris Angina unstable  
Angioedema Angiopathy Anorectal discomfort Anorectal  
disorder Antinuclear antibody positive Anxiety Aortic  
dissection Apathy Aphthous stomatitis Aplastic anaemia  
Arrhythmia Arrhythmia supraventricular Arterial disorder  
Arterial stenosis Arthralgia Arthritis Arthropathy Aspartate  
aminotransferase increased Asphyxia Asterixis Asthenia  
Asthma Ataxia Atrial fibrillation Atrial flutter  
Atrioventricular block first degree Aura Azotaemia Back  
pain Balance disorder Basophilia Blepharitis Blindness Blister  
Blood albumin decreased Blood alkaline phosphatase  
increased Blood amylase increased Blood bilirubin increased  
Blood creatine phosphokinase increased Blood creatinine  
decreased Blood creatinine increased Blood disorder Blood  
lactate dehydrogenase increased Blood phosphorus decreased Blood  
potassium increased Blood pressure increased Blood sodium  
increased Blood urea increased Blood uric acid increased Blood  
urine Blood urine present Body temperature decreased Body  
temperature increased Bone pain Bradycardia Breast disorder  
Breast enlargement Breast feeding Bronchioloalveolar  
carcinoma Bronchitis Bronchospasm Cancer in remission  
Candidiasis Cardiac arrest Cardiac disorder Cardiac failure  
Cardiac failure congestive Cardiac fibrillation Cardiac  
flutter Cardiac murmur Cardiac tamponade Cardio-respiratory  
arrest Cardiogenic shock Cellulitis Cerebral infarction  
Cerebrovascular accident Cerebrovascular disorder  
Cerebrovascular insufficiency Cervical dysplasia Chest  
pain Chills Choking sensation Cholelithiasis Cholestasis  
Chromaturia Coagulopathy Cognitive disorder Colitis  
Collagen-vascular disease Coma Conduction disorder  
Confusional state Congenital anomaly Congenital arterial

malformation      Conjunctival oedema      Conjunctivitis      Connective  
tissue disorder      Constipation      Convulsion      Coombs direct test  
positive      Coombs test positive      Coordination abnormal      Coronary  
artery disease      Cough      Cranial nerve disorder      Crystal urine  
    Crystalluria      Cutaneous vasculitis      Cytolytic hepatitis  
    Deafness      Death      Decreased appetite      Dehydration      Delirium  
    Delusion      Depressed level of consciousness      Depressed mood  
    Dermatitis      Dermatitis atopic      Dermatitis bullous      Dermatitis  
diaper      Dermatitis exfoliative      Dermatomyositis      Developmental  
delay      Diabetes mellitus      Diarrhoea      Diarrhoea haemorrhagic      Disability  
    Discomfort      Disseminated intravascular coagulation      Disturbance  
in sexual arousal      Dizziness      Dizziness postural      Drug  
hypersensitivity      Drug interaction      Drug intolerance      Dry eye      Dry  
mouth      Dry skin      Dysaesthesia      Dysgeusia      Dyskinesia  
    Dysmenorrhoea      Dyspepsia      Dysphagia      Dysphonia      Dyspnoea  
    Dysuria      Ear disorder      Ear infection      Ear pain  
    Ecchymosis      Eczema      Electrocardiogram abnormal  
    Electrocardiogram change      Enanthema      Encephalopathy  
    Endometrial sarcoma      Enterocolitis haemorrhagic      Enzyme  
abnormality      Eosinophilia      Eosinophilic pneumonia      Epistaxis  
    Erectile dysfunction      Erythema      Erythema multiforme  
    Erythema nodosum      Erythropenia      Eschar      Extrasystoles  
    Eye disorder      Eye irritation      Face oedema      Fatigue  
    Febrile neutropenia      Feeling abnormal      Feeling cold  
    Fibrosis      Flank pain      Flat affect      Flatulence      Fluid retention  
    Flushing      Foetor hepaticus      Fungal infection      Gamma-  
glutamyltransferase increased      Gastritis      Gastroenteritis  
    Gastrointestinal disorder      Gastrointestinal haemorrhage  
    Gastrointestinal infection      Gastrointestinal pain  
    Gastrointestinal tract irritation      Generalised oedema  
    Genital candidiasis      Genital discharge      Glossitis      Glossodynia  
    Glycosuria      Gout      Gynaecomastia      Haematemesis  
    Haematochezia      Haematocrit decreased      Haematoma      Haematuria  
    Haemoglobin      Haemoglobin decreased      Haemolysis      Haemolytic  
anaemia      Haemoptysis      Haemorrhage      Haemorrhagic disorder  
    Hallucination      Headache      Hearing impaired      Hepatic enzyme  
increased      Hepatic failure      Hepatic function abnormal      Hepatic  
necrosis      Hepatitis      Hepatitis acute      Hepatitis cholestatic  
    Hepatitis fulminant      Hepatobiliary disease      Hepatocellular  
injury      Hepatomegaly      Hereditary disorder      Herpes simplex  
    Herpes virus infection      Hot flush      Hunger  
    Hyperbilirubinaemia      Hypercalcaemia      Hypercholesterolaemia  
    Hyperglycaemia      Hyperhidrosis      Hyperkalaemia  
    Hyperkinesia      Hyperlipidaemia      Hyperprolactinaemia  
    Hypersensitivity      Hypertension      Hypertensive crisis  
    Hypertonia      Hypertrophy      Hyperuricaemia      Hypoaesthesia  
    Hypocalcaemia      Hypoglycaemia      Hyponatraemia  
    Hypopituitarism      Hypotension      Hypothermia      Hypovolaemia  
    Ichthyosis acquired      Idiopathic thrombocytopenic purpura  
    Ileus      Ill-defined disorder      Illusion      Immune system disorder  
    Inappropriate antidiuretic hormone secretion      Incontinence  
    Increased appetite      Induration      Infarction      Infection  
    Infestation      Inflammation      Influenza      Injection site  
inflammation      Injection site pain      Injection site reaction  
    Insomnia      Intermittent claudication      Interstitial lung

disease Intertrigo candida Intestinal haemorrhage Intestinal  
infarction Irritability Ischaemia Ischaemic stroke Jaundice  
Jaundice cholestatic Joint swelling Laboratory test  
abnormal Lacrimation increased Laryngeal disorder Laryngeal  
oedema Laryngitis Laryngospasm Lethargy Leukocytoclastic  
vasculitis Leukocytosis Leukopenia Libido decreased Lip oedema  
Liver disorder Liver function test abnormal Liver injury  
Local reaction Loss of consciousness Loss of libido Lower  
respiratory tract infection Lung disorder Lymphadenopathy  
Lymphocytosis Lymphopenia Malaise Male sexual  
dysfunction Malnutrition Mean cell volume Mediastinal disorder  
Melaena Memory impairment Menopausal symptoms Menstrual  
disorder Mental disorder Micturition disorder Migraine without  
aura Monocytosis Mood swings Mouth ulceration Mucocutaneous  
candidiasis Mucous membrane disorder Multiple hereditary  
exostosis Muscle spasms Muscle twitching Muscular weakness  
Musculoskeletal discomfort Musculoskeletal pain  
Musculoskeletal stiffness Myalgia Myocardial infarction  
Myocardial ischaemia Myocarditis Myoclonus Nail disorder  
Nasal congestion Nasopharyngitis Nausea Neck pain  
Necrosis Neoplasm malignant Nephritis Nephrolithiasis  
Nephropathy Nephropathy toxic Nephrotic syndrome Nervous  
system disorder Nervousness Neuralgia Neuropathy peripheral  
Neutropenia Nightmare Nocturia Obstruction Obstructive  
airways disorder Oedema Oedema peripheral Oesophageal disorder  
Oesophageal ulcer Oesophagitis Oliguria Onycholysis Oral  
candidiasis Oral herpes Oropharyngeal discomfort Oropharyngeal  
pain Orthostatic hypotension Osteoarthritis Otitis media  
Pain Pain in extremity Pallor Palpitations Pancreatic  
disorder Pancreatitis Pancreatitis acute Pancytopenia  
Paraesthesia Paralysis Pemphigoid Pemphigus Peptic  
ulcer Pericarditis Peripheral coldness Peripheral vascular  
disorder Peritonsillar abscess Pharyngitis Phlebitis Photophobia  
Photosensitivity reaction Pica Pigmentation disorder  
Platelet count decreased Platelet disorder Pleuritic pain  
Pneumonia Pollakiuria Polyneuropathy Polyuria Porphyria  
Porphyria non-acute Presyncope Proctocolitis Productive  
cough Protein urine present Proteinuria Prothrombin level increased  
Prothrombin time shortened Prurigo Pruritus Pruritus  
genital Pseudomembranous colitis Psoriasis Psychosexual  
disorder Psychotic disorder Pulmonary eosinophilia Pulmonary  
fibrosis Purpura Rales Rash Rash erythematous Rash maculo-  
papular Rash papular Rash pustular Raynaud's phenomenon  
Rectal haemorrhage Red blood cell sedimentation rate  
increased Renal artery stenosis Renal failure Renal failure  
acute Renal impairment Renal pain Renal tubular disorder Respiration  
abnormal Respiratory arrest Respiratory disorder Respiratory  
failure Respiratory tract infection Rhabdomyolysis Rheumatic  
fever Rhinitis seasonal Rhinorrhoea Salivary hypersecretion Scab  
Scleroderma Scrotal oedema Seasonal allergy Seborrhoeic  
dermatitis Sedation Sensitisation Sensory loss Serositis  
Serum sickness Sexual dysfunction Shock Sialoadenitis  
Sinusitis Skin cancer Skin candida Skin disorder Skin  
exfoliation Skin hyperpigmentation Skin hypertrophy Skin induration  
Skin infection Sleep disorder Sneezing Somnolence

Speech disorder    Status epilepticus    Stevens-Johnson  
 syndrome    Stomatitis    Stridor    Stupor    Sudden death  
 Superinfection    Swelling    Swelling face    Swollen tongue  
 Syncope    Syphilis    Systemic lupus erythematosus    Tachycardia  
 Tenderness    Tension    Thirst    Thrombocytopenia  
 Thrombocytopenic purpura    Thrombocytosis    Thrombophlebitis  
 Tinea infection    Tinnitus    Tongue discolouration    Tongue  
 disorder    Tongue oedema    Tooth discolouration    Toxic epidermal  
 necrolysis    Tracheobronchitis    Transaminases increased    Transient  
 ischaemic attack    Tremor    Trismus    Tubulointerstitial nephritis  
 Tympanic membrane disorder    Type IV hypersensitivity reaction  
 Ulcer    Upper gastrointestinal haemorrhage    Upper respiratory  
 tract infection    Upper respiratory tract inflammation    Upper-  
 airway cough syndrome    Urethral disorder    Urethral pain    Urinary  
 incontinence    Urinary retention    Urinary tract disorder    Urinary  
 tract infection    Urine analysis abnormal    Urine output increased  
 Urticaria    Vaginal discharge    Vaginal infection    Vaginal  
 inflammation    Varicose vein    Vascular purpura    Vascular stenosis  
 Vasculitis    Vasodilation procedure    Ventricular extrasystoles  
 Ventricular tachycardia    Vertigo    Viral infection  
 Vision blurred    Visual acuity reduced    Visual impairment  
 Vomiting    Vulvovaginal candidiasis    Vulvovaginal  
 discomfort    Vulvovaginal mycotic infection    Vulvovaginal pruritus  
 Weight decreased    Weight increased    White blood cell count  
 decreased    White blood cells urine positive

\*\*\*\*\*  
 \*\*\*\*\*

Neuronal acetylcholine receptor subunit alpha-6 - Group: Channel  
 Treated with:

nicotine: approved    small molecule    (98 associated side effects)  
 For the relief of nicotine withdrawal symptoms and as an aid  
 to smoking cessation.

galantamine: approved    small molecule    (160 associated side  
 effects)    For the treatment of mild to moderate dementia of the  
 Alzheimer's type. Has also been investigated in patients with mild  
 cognitive impairment who did not meet the diagnostic criteria for  
 Alzheimer's disease.

varenicline: approved    small molecule    (285 associated side  
 effects)    For use as an aid in smoking cessation.

371 known side effects mediated through drugs targeting this  
 protein:

Abdominal discomfort    Abdominal pain    Abnormal dreams    Abnormal  
 faeces    Acne    Acute coronary syndrome    Affect lability  
 Aggression    Agitation    Amnesia    Anaemia    Anger    Angina  
 pectoris    Angioedema    Angiopathy    Anxiety    Aortic dissection  
 Apathy    Aphasia    Aphthous stomatitis    Apraxia  
 Arrhythmia    Arrhythmia supraventricular    Arterial disorder  
 Arthralgia    Arthritis    Asthenia    Asthma    Ataxia  
 Atrial fibrillation    Atrioventricular block    Back pain  
 Balance disorder    Bladder disorder    Bladder pain    Blindness  
 Blindness transient    Blister    Blood alkaline phosphatase  
 increased    Blood pressure increased    Blood urea increased    Body  
 temperature increased    Bone pain    Bradycardia    Bradyphrenia  
 Breast disorder    Bronchitis    Bronchospasm    Bundle branch

block Cardiac disorder Cardiac failure Cardiac fibrillation  
Cardiac flutter Cardiovascular disorder Cataract  
Cataract subcapsular Cerebrovascular accident  
Cerebrovascular disorder Change of bowel habit Chest  
discomfort Chest pain Chills Chronic obstructive pulmonary  
disease Circadian rhythm sleep disorder Coagulopathy  
Completed suicide Confusional state Conjunctivitis Connective  
tissue disorder Constipation Convulsion Coordination abnormal  
Cor pulmonale Coronary artery disease Costochondritis  
Cough Cystitis Cystitis noninfective Deafness Death  
Decreased appetite Dehydration Delirium Delusion  
Dependence Depressed mood Depression Dermatitis Dermatitis  
bullous Diabetes mellitus Diarrhoea Discomfort Disorientation  
Dissociation Disturbance in attention Disturbance in  
sexual arousal Diverticulitis Dizziness Drug abuse Drug  
dependence Drug hypersensitivity Dry eye Dry mouth Dry skin  
Dysarthria Dysgeusia Dysmenorrhoea Dyspepsia Dysphagia  
Dysphonia Dysphoria Dyspnoea Ear pain Eczema  
Electrocardiogram QT prolonged Electrocardiogram ST segment  
Electrocardiogram ST segment depression Electrocardiogram T  
wave amplitude decreased Electrocardiogram T wave inversion  
Electrocardiogram abnormal Embolism Emotional disorder  
Endocrine disorder Enterocolitis Epistaxis Erectile  
dysfunction Eructation Erythema Erythema multiforme Euphoric  
mood Extrasystoles Eye disorder Eye irritation Eye pain  
Fatigue Feeling abnormal Feeling cold Flat affect  
Flatulence Flushing Frustration Fungal infection Gallbladder  
disorder Gastric disorder Gastric ulcer Gastritis  
Gastroenteritis Gastrointestinal disorder Gastrointestinal  
haemorrhage Gastrointestinal pain Gastroesophageal reflux disease  
Gingival pain Gingivitis Glycosuria Gravitational oedema  
Haematemesis Haematochezia Haematuria Haemoglobin  
Haemorrhage Hallucination Headache Hepatic enzyme  
increased Hepatitis Hepatobiliary disease Hiccups Homicidal  
ideation Hormone level abnormal Hostility Hot flush  
Hyperglycaemia Hyperhidrosis Hyperkalaemia  
Hyperkinesia Hyperlipidaemia Hypersensitivity Hypersomnia  
Hypertension Hypertonia Hypoaesthesia Hypocalcaemia  
Hypogeusia Hypoglycaemia Hypokalaemia Hypokinesia  
Hypotension Ill-defined disorder Immune system disorder  
Incontinence Increased appetite Increased bronchial  
secretion Infarction Infection Infestation Influenza Influenza  
like illness Initial insomnia Insomnia Intestinal obstruction  
Irritability Ischaemia Joint stiffness Lacrimation  
increased Lethargy Leukocytosis Libido decreased Libido  
increased Liver disorder Liver function test abnormal Loss of  
consciousness Lower gastrointestinal haemorrhage Lung disorder  
Lymphadenopathy Malaise Mania Mediastinal disorder  
Melaena Menopausal symptoms Menorrhagia Menstrual  
disorder Mental disability Mental disorder Mental retardation  
Middle insomnia Migraine Mood swings Mouth ulceration  
Multiple sclerosis Muscle contractions involuntary  
Muscle enzyme increased Muscle spasms Musculoskeletal  
chest pain Musculoskeletal discomfort Musculoskeletal disorder  
Musculoskeletal pain Musculoskeletal stiffness Myalgia

Mydriasis Myocardial infarction Myocardial ischaemia  
 Myopia Myositis Nasal congestion Nasal discomfort Nasal  
 ulcer Nasopharyngitis Nausea Nephrolithiasis Nervous system  
 disorder Nervousness Neuropathy peripheral Night blindness Night  
 sweats Nightmare Nocturia Nystagmus Obstruction Obstructive  
 airways disorder Ocular vascular disorder Oedema Oedema  
 peripheral Oesophageal disorder Oesophageal perforation  
 Oesophagitis Oropharyngeal pain Orthostatic  
 hypotension Osteoarthritis Osteoporosis Pain Pain in extremity  
 Pain in jaw Palpitations Pancreatitis acute Panic  
 reaction Paraesthesia Paralysis Paranoia Parosmia  
 Peripheral ischaemia Peripheral vascular disorder Pharyngitis  
 Photophobia Photosensitivity reaction Platelet count  
 decreased Pleurisy Pneumonia Pollakiuria Polydipsia Polyuria  
 Pruritus Psoriasis Psychomotor skills impaired Psychotic  
 disorder Pulmonary embolism Purpura Rash Rash generalised  
 Rectal haemorrhage Renal failure Renal failure acute  
 Respiratory disorder Respiratory tract infection Restless  
 legs syndrome Rhinitis Rhinorrhoea Salivary hypersecretion  
 Scotoma Semen analysis abnormal Sensory disturbance  
 Sensory loss Sexual dysfunction Shock Sinus congestion  
 Sinusitis Sleep disorder Sneezing Snoring Somnolence  
 Splenomegaly Sputum increased Stomatitis Suicidal ideation  
 Suicide attempt Supraventricular tachycardia Syncope  
 Tachycardia Tenderness Tension Terminal insomnia Thinking  
 abnormal Thirst Throat irritation Thrombocytopenia  
 Thrombocytosis Thrombosis Thyroid disorder Tinnitus  
 Tobacco user Tongue coated Tooth disorder Transient  
 ischaemic attack Tremor Ulcer Upper respiratory tract infection  
 Upper-airway cough syndrome Urethral disorder Urethral syndrome  
 Urinary incontinence Urinary retention Urinary tract disorder  
 Urinary tract infection Urine abnormality Urine analysis  
 abnormal Urine output increased Urticaria VIIIth nerve paralysis  
 Vaginal discharge Vascular dementia Vascular purpura Ventricular  
 extrasystoles Ventricular tachycardia Vertigo Viral  
 infection Vision blurred Visual acuity reduced Visual impairment  
 Vitreous floaters Vomiting Weight decreased Weight increased  
 Withdrawal syndrome

\*\*\*\*\*  
 \*\*\*\*\*

Epidermal growth factor receptor - Group: Enzyme

Treated with:

cetuximab: approved biotech (0 associated side effects) For  
 treatment of EGFR-expressing metastatic colorectal cancer in  
 patients who are refractory to other irinotecan-based chemotherapy  
 regimens. Cetuximab is also indicated for treatment of squamous cell  
 carcinoma of the head and neck in conjunction with radiation  
 therapy.

trastuzumab: approved biotech (0 associated side effects)  
 For treatment of early stage HER2-positive breast cancer, or  
 metastatic breast cancer that substantially overexpress HER2.

lidocaine: approved small molecule (120 associated side  
 effects) For production of local or regional anesthesia by  
 infiltration techniques such as percutaneous injection and  
 intravenous regional anesthesia by peripheral nerve block techniques

such as brachial plexus and intercostal and by central neural techniques such as lumbar and caudal epidural blocks.

gefitinib: approved small molecule (98 associated side effects)

For the continued treatment of patients with locally advanced or metastatic non-small cell lung cancer after failure of either platinum-based or docetaxel chemotherapies.

erlotinib: approved small molecule (118 associated side effects) For the treatment of patients with locally advanced or metastatic non-small cell lung cancer after failure of at least one prior chemotherapy regimen. Also for use, in combination with gemcitabine, as the first-line treatment of patients with locally advanced, unresectable or metastatic pancreatic cancer.

lapatinib: approved small molecule (0 associated side effects)

Indicated in combination with capecitabine for the treatment of patients with advanced or metastatic breast cancer whose tumors overexpress the human epidermal receptor type 2 (HER2) protein and who have received prior therapy including an anthracycline, a taxane, and trastuzuma.

panitumumab: approved biotech (0 associated side effects)

For the treatment of EGFR-expressing, metastatic colorectal carcinoma that is refractory to fluoropyrimidine-, oxaliplatin-, and irinotecan- containing chemotherapy regimens.

flavopiridol: experimental small molecule (0 associated side effects) Investigated for use/treatment in esophageal cancer, leukemia (lymphoid), lung cancer, liver cancer, and lymphoma (unspecified).

s-{3-[(4-anilinoquinazolin-6-yl)amino]-3-oxopropyl}-l-cysteine: experimental small molecule (0 associated side effects)

n-[4-(3-bromo-phenylamino)-quinazolin-6-yl]-acrylamide: experimental small molecule (0 associated side effects)

248 known side effects mediated through drugs targeting this protein:

Abdominal pain Acidosis Acne Acute coronary syndrome Acute respiratory distress syndrome Agitation Alanine aminotransferase increased Alopecia Alveolitis Amblyopia Anaemia Anaphylactic shock Anaphylactoid reaction Angioedema Angiopathy Anorectal disorder Anterior spinal artery syndrome Anxiety Aortic dissectionApnoea Arachnoiditis Arrhythmia Arthralgia Aspartate aminotransferase increased Asthenia Atrial fibrillation Atrial flutter Atrioventricular block Back pain Blepharitis Blister Body temperature increased Bone pain Bradycardia Bronchiolitis Bronchospasm Bundle branch block Burning sensationCancer painCardiac arrest Cardiac disorder Cardiac fibrillation Cardiac flutter Cardiac output decreased Cauda equina syndrome Cerebral haemorrhage Cerebrovascular accident Chills Colitis Conduction disorder Confusional stateConjunctival hyperaemia Conjunctivitis Constipation Convulsion Corneal erosion CoughCranial nerve paralysis Decreased appetite Deep vein thrombosis DehydrationDepressed level of consciousness Dermatitis Dermatitis bullous Dermatitis exfoliative Diarrhoea Diplegia Diplopia Disease progression Disorientation Dizziness Drug interaction Dry skin



Dysarthria Dysgeusia Dyspepsia Dysphagia Dyspnoea  
 Effusion Elderly Electrocardiogram QT prolonged  
 Electrolyte imbalance Epistaxis Erythema Erythema  
 multiforme Euphoric mood Extravasation Eye disorder Eye  
 pain Fatigue Febrile neutropenia Feeling abnormal Feeling hot  
 Fibrosis Flatulence Fluid overload Flushing Foetor  
 hepaticus Gastritis Gastrointestinal disorder Gastrointestinal  
 haemorrhage Gastrointestinal pain Gingivitis Haematemesis  
 Haematochezia Haematuria Haemoglobin Haemolytic anaemia  
 Haemoptysis Haemorrhage Headache Hepatic cancer metastatic  
 Hepatic failure Hepatic function abnormal Hepatocellular  
 injury Hirsutism Hyperacusis Hyperaemia Hyperaesthesia  
 Hyperhidrosis Hypersensitivity Hypertension  
 Hyperthermia Hypoaesthesia oral Hypokalaemia  
 Hypomagnesaemia Hypotension Hypoxia Idiopathic pulmonary  
 fibrosis Ileus Immune system disorder Incontinence Infarction  
 Infection Infestation Inflammation Insomnia  
 Interstitial lung disease Ischaemia Keratitis  
 Keratoconjunctivitis sicca Laryngeal oedema Laryngospasm  
 Leukoderma Liver disorder Local reaction Loss of  
 consciousness Lung disorder Lung infection Lung infiltration  
 Maculopathy Mediastinal disorder Melaena Meningism  
 Meningitis Metastases to liver Metastasis  
 Methaemoglobinaemia Microangiopathic haemolytic anaemia  
 Miosis Monoplegia Mouth ulceration Muscle twitching  
 Musculoskeletal discomfort Myalgia Myocardial depression  
 Myocardial infarction Nail disorder Nausea Neoplasm  
 Neoplasm malignant Nervous system disorder Nervousness  
 Neuropathy peripheral Neutropenia Obliterative bronchiolitis  
 Oedema Oedema peripheral Optic nerve disorder  
 Oropharyngeal discomfort Oropharyngeal pain  
 Osteoarthritis Pain Pancreatic carcinoma Pancreatitis  
 Papule Paraesthesia oral Paralysis Paraplegia Paronychia  
 Peptic ulcer Peptic ulcer haemorrhage Petechiae  
 Phlebitis Pleural disorder Pleural effusion Pneumoconiosis  
 Pneumonia Pruritus Pulmonary fibrosis Pulmonary  
 function test decreased Pulmonary haemorrhage Pulmonary  
 toxicity Rash Rash pustular Renal failure Renal failure  
 acute Respiratory arrest Respiratory depression Respiratory  
 disorder Respiratory distress Respiratory failure Respiratory  
 paralysis Retinitis pigmentosa Rosacea Scrotal oedema  
 Seborrhoeic dermatitis Sensory loss Shock Sicca syndrome  
 Sinus arrhythmia Skin exfoliation Skin fissures Skin  
 hyperpigmentation Sneezing Somnolence Stomatitis Syncope  
 Tenderness Tension Thrombocytopenia Thrombophlebitis  
 Thrombosis Tinnitus Toxic epidermal necrolysis Tremor  
 Ulcer Ulcer haemorrhage Ulcerative keratitis Urinary  
 incontinence Urinary retention Urticaria Venous thrombosis  
 Ventricular fibrillation Vision blurred Visual impairment  
 Vomiting Weight decreased

\*\*\*\*\*  
 \*\*\*\*\*

Neuronal acetylcholine receptor subunit alpha-3 - Group: Channel  
 Treated with:

nicotine: approved small molecule (98 associated side effects)  
For the relief of nicotine withdrawal symptoms and as an aid to smoking cessation.

galantamine: approved small molecule (160 associated side effects)  
For the treatment of mild to moderate dementia of the Alzheimer's type. Has also been investigated in patients with mild cognitive impairment who did not meet the diagnostic criteria for Alzheimer's disease.

levamisole: approved small molecule (0 associated side effects)

pentolinium: approved small molecule (0 associated side effects)  
Used to produce controlled hypotension during surgical procedures and in hypertensive crises.

bupropion: approved small molecule (441 associated side effects)  
For the treatment of depression and as aid to smoking cessation.

levomethadyl acetate: approved small molecule (0 associated side effects)  
For the treatment and management of opiate dependence. It is sometimes used to treat severe pain in terminal patients.

varenicline: approved small molecule (285 associated side effects)  
For use as an aid in smoking cessation.

583 known side effects mediated through drugs targeting this protein:

Abdominal discomfort Abdominal distension Abdominal pain  
Abdominal pain lower Abdominal pain upper Abnormal dreams  
Abnormal faeces Abscess Acne Acute coronary syndrome  
Affect lability Aggression Agitation Akathisia Akinesia  
Alopecia Altered state of consciousness Amblyopia  
Amenorrhoea Amnesia Anaemia Anaphylactic shock Anger  
Angina pectoris Angioedema Angiopathy Anxiety Aortic  
dissection Apathy Aphasia Aphthous stomatitis Application  
site reaction Apraxia Arrhythmia Arrhythmia supraventricular  
Arterial disorder Arthralgia Arthritis Asthenia Asthma  
Ataxia Atrial fibrillation Atrioventricular block  
Atrioventricular block complete Back pain Balance disorder  
Basal cell carcinoma Bipolar I disorder Bipolar disorder  
Bladder disorder Bladder pain Blindness Blindness  
transient Blister Blood alkaline phosphatase increased Blood  
pressure increased Blood urea increased Body temperature  
increased Bone pain Bradycardia Bradykinesia Bradyphrenia  
Breast calcifications Breast cancer Breast disorder  
Breast enlargement Breast tenderness Breath odour  
Bronchitis Bronchospasm Bruxism Bundle branch block  
Bursitis Cardiac disorder Cardiac failure Cardiac  
fibrillation Cardiac flutter Cardiovascular disorder  
Carpal tunnel syndrome Cataract Cataract subcapsular  
Cerebrovascular accident Cerebrovascular disorder  
Change of bowel habit Chest discomfort Chest pain Chills  
Chronic obstructive pulmonary disease Circadian rhythm sleep  
disorder Circumoral oedema Coagulopathy Cold sweat Colitis  
Coma Completed suicide Confusional state Conjunctivitis  
Conjunctivitis infective Connective tissue disorder  
Constipation Convulsion Coordination abnormal Cor  
pulmonale Coronary artery disease Costochondritis Cough

Crocodile tears syndrome      Cystitis      Cystitis noninfective  
 Cytolytic hepatitis      Deafness      Death      Decreased appetite  
 Defaecation urgency      Dehydration      Delirium      Delusion  
 Dental caries      Dependence      Depersonalisation      Depressed level  
 of consciousness      Depressed mood      Depression      Depressive symptom  
 Derealisation      Dermal cyst      Dermatitis      Dermatitis atopic  
 Dermatitis bullous      Dermatitis exfoliative      Diabetes mellitus  
 Diarrhoea      Diplopia      Discomfort      Disorientation  
 Dissociation      Disturbance in attention      Disturbance in  
 sexual arousal      Diverticulitis      Dizziness      Drug abuse      Drug  
 dependence      Drug hypersensitivity      Dry eye      Dry mouth      Dry skin  
 Duodenal ulcer      Duodenal ulcer haemorrhage      Dysarthria  
 Dysgeusia      Dyskinesia      Dyslexia      Dysmenorrhoea      Dyspareunia  
 Dyspepsia      Dysphagia      Dysphonia      Dysphoria      Dyspnoea  
 Dystonia      Dysuria      Ear infection      Ear pain      Ecchymosis  
 Eczema      Ejaculation disorder      Electrocardiogram QT  
 prolonged      Electrocardiogram ST segment      Electrocardiogram ST segment  
 depression      Electrocardiogram T wave amplitude decreased  
     Electrocardiogram T wave inversion      Electrocardiogram abnormal  
     Electroencephalogram abnormal      Embolism      Emotional  
 disorder      Endocrine disorder      Energy increased      Enterocolitis  
 Enuresis      Epicondylitis      Epistaxis      Erectile dysfunction  
 Eructation      Erythema multiforme      Euphoric mood  
 Extrapyrmidal disorder      Extrasystoles      Eye disorder  
 Eye irritation      Eye pain      Face oedema      Fatigue      Feeling  
 abnormal      Feeling cold      Feeling hot      Feeling jittery      Feeling of  
 despair      Female sexual arousal disorder      Flank pain      Flat affect  
 Flatulence      Flushing      Folliculitis      Food allergy  
 Frequent bowel movements      Frustration      Fungal infection  
 Gallbladder disorder      Gastric disorder      Gastric pH decreased  
 Gastric ulcer      Gastritis      Gastritis viral      Gastroenteritis  
 Gastrointestinal disorder      Gastrointestinal haemorrhage  
 Gastrointestinal pain      Gastrooesophageal reflux disease  
 Genital rash      Gingival bleeding      Gingival pain      Gingivitis  
 Glossitis      Glycosuria      Gravitational oedema      Gynaecomastia  
 Haematemesis      Haematochezia      Haematuria      Haemoglobin  
 Haemorrhage      Hair colour changes      Hallucination  
 Hallucination, auditory      Headache      Hearing impaired      Heart  
 rate irregular      Hepatic enzyme increased      Hepatic function  
 abnormal      Hepatitis      Hepatitis C      Hepatobiliary disease  
 Hepatocellular injury      Hernia      Herpes virus infection  
 Herpes zoster      Hiccups      Hirsutism      Homicidal ideation  
 Hordeolum      Hormone level abnormal      Hostility      Hot flush  
 Hunger      Hyperacusis      Hyperaesthesia      Hyperchlorhydria  
 Hypercholesterolaemia      Hyperglycaemia      Hyperhidrosis  
 Hyperkalaemia      Hyperkinesia      Hyperlipidaemia  
 Hypersensitivity      Hypersomnia      Hypertension      Hypertonia  
 Hypertonic bladder      Hypertrophy      Hyperventilation  
 Hypoaesthesia      Hypocalcaemia      Hypogeusia      Hypoglycaemia  
 Hypokalaemia      Hypokinesia      Hypomania      Hypotension      Hypotonia  
 Hypotrichosis      Ill-defined disorder      Immune system disorder  
 Impaired healing      Inappropriate antidiuretic hormone secretion  
 Incontinence      Increased appetite      Increased bronchial  
 secretion      Increased tendency to bruise      Infarction      Infection  
 Infestation      Influenza      Influenza like illness      Infrequent bowel

movements Inguinal hernia Initial insomnia Insomnia  
 Interstitial lung disease Intestinal obstruction Intestinal  
 perforation Intraocular pressure increased Irritability  
 Ischaemia Jaundice Joint stiffness Joint swelling  
 Keratitis Keratoconjunctivitis sicca Lacrimation decreased  
 Lacrimation increased Laryngitis Latex allergy Lethargy  
 Leukocytosis Leukopenia Libido decreased Libido increased  
 Lip dry Liver disorder Liver function test abnormal Liver  
 injury Localised infection Loss of consciousness Lower  
 gastrointestinal haemorrhage Lung disorder Lymphadenopathy  
 Maculopathy Malaise Mania Mediastinal disorder Melaena  
 Memory impairment Menopausal symptoms Menopause Menorrhagia  
 Menstrual disorder Menstruation irregular Mental disability  
 Mental disorder Mental retardation Metrorrhagia  
 Micturition disorder Micturition urgency Middle insomnia  
 Migraine Mood swings Motion sickness Mouth ulceration  
 Multiple sclerosis Muscle contractions involuntary  
 Muscle enzyme increased Muscle relaxant therapy  
 Muscle rigidity Muscle spasms Muscle tightness Muscle  
 twitching Muscular weakness Musculoskeletal chest pain  
 Musculoskeletal discomfort Musculoskeletal disorder  
 Musculoskeletal pain Musculoskeletal stiffness Myalgia  
 Mydriasis Myocardial infarction Myocardial ischaemia  
 Myoclonus Myopia Myositis Nasal congestion Nasal  
 discomfort Nasal dryness Nasal ulcer Nasopharyngitis Nausea  
 Neck pain Neoplasm Neoplasm malignant Nephrolithiasis  
 Nervous system disorder Nervousness Neuralgia Neuropathy  
 peripheral Night blindness Night sweats Nightmare Nipple pain  
 Nocturia Nystagmus Obstruction Obstructive airways disorder  
 Ocular vascular disorder Oedema Oedema mouth  
 Oedema peripheral Oesophageal disorder Oesophageal  
 perforation Oesophagitis Oral pain Orgasm abnormal  
 Oropharyngeal pain Orthostatic hypotension  
 Osteoarthritis Osteoporosis Ovarian cyst Ovarian  
 disorder Pain Pain in extremity Pain in jaw Painful erection  
 Pallor Palpitations Pancreatitis Pancreatitis  
 acute Pancytopenia Panic attack Panic reaction  
 Paraesthesia Paralysis Paranoia Parkinsonism  
 Parosmia Pelvic infection Peripheral coldness Peripheral  
 ischaemia Peripheral vascular disorder Perseveration Pharyngitis  
 Pharyngitis streptococcal Phlebitis Photophobia  
 Photosensitivity reaction Platelet count decreased  
 Pleurisy Pleuritic pain Pneumonia Pollakiuria Polydipsia  
 Polyp Polyuria Premenstrual syndrome Procedural pain  
 Prostate infection Prostatic disorder Prurigo  
 Pruritus Pruritus generalised Psoriasis Psychomotor  
 skills impaired Psychotic disorder Pulmonary congestion  
 Pulmonary embolism Purpura Rash Rash erythematous Rash  
 generalised Rash maculo-papular Rectal haemorrhage Renal  
 failure Renal failure acute Renal pain Respiration abnormal  
 Respiratory disorder Respiratory tract congestion Respiratory  
 tract infection Restless legs syndrome Retinitis pigmentosa  
 Rhabdomyolysis Rhinitis Rhinitis seasonal Rhinorrhoea  
 Salivary hypersecretion Salpingitis Sciatica Scotoma  
 Seasonal allergy Sebaceous gland disorder Sedation Semen

analysis abnormal Sensation of heaviness Sensory disturbance  
 Sensory loss Serum sickness Sexual dysfunction Shock  
 Sicca syndrome Sinus congestion Sinus disorder Sinus  
 headache Sinusitis Skin disorder Skin irritation Skin odour  
 abnormal Sleep disorder Sneezing Snoring Somnambulism  
 Somnolence Splenomegaly Sputum increased Stomatitis  
 Stress Suicidal ideation Suicide attempt Supraventricular  
 tachycardia Swelling Swelling face Syncope Tachycardia  
 Tardive dyskinesia Tenderness Tendon disorder Tendonitis  
 Tension Tension headache Terminal insomnia Testicular pain  
 Testicular swelling Thinking abnormal Thirst Throat  
 irritation Thrombocytopenia Thrombocytosis Thrombosis Thyroid  
 disorder Tinea infection Tinea pedis Tinnitus Tobacco user  
 Tongue coated Tongue disorder Tongue oedema Tonsillitis  
 Tooth abscess Tooth disorder Tooth infection Toothache  
 Transient ischaemic attack Tremor Trichotillomania Type  
 IV hypersensitivity reaction Ulcer Ulcer haemorrhage Upper respiratory  
 tract infection Upper-airway cough syndrome Urethral disorder  
 Urethral pain Urethral syndrome Urinary incontinence  
 Urinary retention Urinary tract disorder Urinary tract  
 infection Urine abnormality Urine analysis abnormal Urine  
 output increased Urticaria VIIIth nerve paralysis Vaginal discharge  
 Vaginal haemorrhage Vaginal infection Vaginal inflammation  
 Vaginitis bacterial Vascular dementia Vascular purpura  
 Vasodilation procedure Ventricular extrasystoles Ventricular  
 tachycardia Vertigo Viral diarrhoea Viral infection Vision  
 blurred Visual acuity reduced Visual impairment Vitreous floaters  
 Vocal cord disorder Vomiting Vulvovaginal discomfort  
 Weight decreased Weight increased Wheezing Withdrawal  
 syndrome Wound infection Yawning

\*\*\*\*\*  
 \*\*\*\*\*

Amiloride-sensitive sodium channel subunit beta - Group: Channel  
 Treated with:  
 triamterene: approved small molecule (25 associated side  
 effects) For the treatment of edema associated with congestive  
 heart failure, cirrhosis of the liver, and the nephrotic syndrome;  
 also in steroid-induced edema, idiopathic edema, and edema due to  
 secondary hyperaldosteronism.  
 amiloride: approved small molecule (85 associated side effects)  
 For use as adjunctive treatment with thiazide diuretics or  
 other kaliuretic-diuretic agents in congestive heart failure or  
 hypertension.

98 known side effects mediated through drugs targeting this protein:  
 Abdominal distension Abdominal pain Agitation Alopecia  
 Anaemia Anaemia megaloblastic Anaphylactic shock  
 Angina pectoris Aplastic anaemia Arthralgia Asthenia  
 Atrioventricular block Atrioventricular block complete  
 Azotaemia Back pain Bladder pain Bladder spasm Blood  
 potassium increased Blood urea increased Bradycardia Chest pain  
 Coma Confusional state Constipation Cough Decreased  
 appetite Dehydration Dermatitis Diarrhoea Disturbance in sexual  
 arousal Dizziness Dry mouth Dyspepsia Dyspnoea Dysuria  
 Encephalopathy Erectile dysfunction Fatigue Feeling

abnormal Flatulence Foetor hepaticus Gastrointestinal haemorrhage  
 Gastrointestinal pain Gynaecomastia Haemoglobin Haemorrhage  
 Headache Hepatic encephalopathy Hepatic function abnormal  
 Hepatocellular injury Hyperkalaemia Hyperkinesia  
 Hypersensitivity Hypokalaemia Hyponatraemia Hypotension  
 Insomnia Intraocular pressure increased Jaundice  
 Libido decreased Liver disorder Muscle spasms Muscular  
 weakness Musculoskeletal discomfort Nasal congestion Nausea  
 Neck pain Nephritis Nephrolithiasis Nervousness Neutropenia  
 Oral pruritus Orthostatic hypotension Pain Pain in  
 extremity Palpitations Paraesthesia Paralysis flaccid  
 Peptic ulcer Photosensitivity reaction Pollakiuria  
 Polyuria Pruritus Rash Renal failure acute Shock  
 Somnolence Tension Thirst Thrombocytopenia Tinnitus  
 Tremor Tubulointerstitial nephritis Ulcer Urine output  
 increased Vertigo Visual impairment Vomiting

\*\*\*\*\*  
 \*\*\*\*\*

Glutamate receptor, ionotropic kainate 4 - Group: Channel

Treated with:

l-glutamic acid: approved, nutraceutical small molecule (0 associated side effects) Considered to be nature's "Brain food" by improving mental capacities; helps speed the healing of ulcers; gives a "lift" from fatigue; helps control alcoholism, schizophrenia and the craving for sugar.

known side effects mediated through drugs targeting this protein:

\*\*\*\*\*  
 \*\*\*\*\*

Voltage-dependent L-type calcium channel subunit alpha-1F - Group: Channel

Treated with:

nimodipine: approved small molecule (47 associated side effects)

For use as an adjunct to improve neurologic outcome following subarachnoid hemorrhage (SAH) from ruptured intracranial berry aneurysms by reducing the incidence and severity of ischemic deficits.

cinnarizine: approved small molecule (0 associated side effects) For the treatment of vertigo/meniere's disease, nausea and vomiting, motion sickness and also useful for vestibular symptoms of other origins.

verapamil: approved small molecule (113 associated side effects) For the treatment of hypertension, angina, and cluster headache prophylaxis.

mibefradil: withdrawn small molecule (0 associated side effects)  
 For the treatment of angina and high blood pressure.

139 known side effects mediated through drugs targeting this protein:

Abdominal discomfort Acne Acute coronary syndrome Alanine aminotransferase increased Alopecia Anaemia Anaphylactic shock Angioedema Arthralgia Asthenia Atrioventricular block Atrioventricular block complete Atrioventricular dissociation Balance disorder Blindness Blood alkaline

phosphatase increased Blood lactate dehydrogenase increased Blood  
 prolactin increased Blood urea increased Bradycardia  
 Bronchospasm Cardiac failure Cardiac failure congestive  
 Cardiomyopathy Cerebrovascular accident Chest pain  
 Cholestasis Confusional state Constipation Convulsion Deep  
 vein thrombosis Depressive symptom Dermatitis Diarrhoea  
 Diplopia Discomfort Disseminated intravascular coagulation  
 Dissociation Dizziness Dry mouth Dyspepsia Dyspnoea  
 Ecchymosis Electrocardiogram abnormal Erectile dysfunction  
 Erythema Erythema multiforme Extrapyrarnidal disorder  
 Fasting Fatigue Feeling abnormal Feeling cold Fluid  
 retention Flushing Galactorrhoea Gastrointestinal disorder  
 Gastrointestinal haemorrhage Gingival hyperplasia  
 Gynaecomastia Haematoma Headache Hepatic enzyme  
 increased Hepatic function abnormal Hepatitis Hyperhidrosis  
 Hyperkeratosis Hyperplasia Hyperprolactinaemia  
 Hypersensitivity Hypertension Hypertrophic cardiomyopathy  
 Hypertrophy Hypoaesthesia Hyponatraemia Hypotension Ileus  
 paralytic Infection Influenza Insomnia Intermittent  
 claudication Jaundice Joint swelling Laryngospasm  
 Lethargy Liver function test abnormal Loss of consciousness  
 Macule Muscle fatigue Muscle spasms Muscular weakness  
 Musculoskeletal discomfort Myalgia Myocardial infarction  
 Nausea Nystagmus Oedema Oedema peripheral  
 Oligomenorrhoea Orthostatic hypotension Pain  
 Palpitations Paraesthesia Paralysis Pharyngitis  
 Platelet count decreased Pollakiuria Pruritus Pulmonary  
 oedema Purpura Quadriparesis Rash Rash maculo-papular  
 Respiratory failure Respiratory tract infection Rhinitis  
 Sensory loss Shock Sinus arrest Sinusitis Sleep  
 disorder Somnolence Syncope Tachycardia Thrombocytopenia  
 Thrombosis Tinnitus Tremor Upper respiratory tract  
 infection Urticaria Vascular purpura Vasculitis Vasospasm  
 Venous thrombosis Vertigo Vision blurred Visual acuity  
 reduced Visual impairment Vomiting Wheezing

\*\*\*\*\*  
 \*\*\*\*\*

Neuropeptide S receptor - Group: Receptor

Treated with:

halothane: approved small molecule (10 associated side effects)  
 For the induction and maintenance of general anesthesia

10 known side effects mediated through drugs targeting this protein:

Arrhythmia Cardiac arrest Chills Hepatic necrosis  
 Hyperpyrexia Hypotension Nausea Necrosis Respiratory  
 arrest Vomiting

\*\*\*\*\*  
 \*\*\*\*\*

Thiamine transporter 1 - Group: Transporter

Treated with:

thiamine: approved, nutraceutical small molecule (18 associated  
 side effects) For the treatment of thiamine and niacin deficiency  
 states, Korsakov's alcoholic psychosis, Wernicke-Korsakov syndrome,  
 delirium, and peripheral neuritis.

18 known side effects mediated through drugs targeting this protein:  
Agitation Anaphylactic shock Angioedema Asthenia Cyanosis  
Death Feeling hot Haemoglobin Haemorrhage Hyperhidrosis  
Hypersensitivity Induration Oedema Pruritus Pulmonary  
oedema Tenderness Throat tightness Urticaria

\*\*\*\*\*  
\*\*\*\*\*

Insulin receptor substrate 1 - Group: Other

Treated with:

[4-({5-(aminocarbonyl)-4-[(3-methylphenyl)amino]pyrimidin-2-yl}amino)phenyl]acetic acid: experimental small molecule (0 associated side effects)

known side effects mediated through drugs targeting this protein:

\*\*\*\*\*  
\*\*\*\*\*

TGF-beta receptor type-1 - Group: Enzyme

Treated with:

4-(3-pyridin-2-yl-1h-pyrazol-4-yl)quinoline: experimental small molecule (0 associated side effects)

naphthyridine inhibitor: experimental small molecule (0 associated side effects)

3-(4-fluorophenyl)-2-(6-methylpyridin-2-yl)-5,6-dihydro-4h-pyrrolo[1,2-b]pyrazole: experimental small molecule (0 associated side effects)

n-[4-(5-fluoro-6-methylpyridin-2-yl)-5-quinoxalin-6-yl-1h-imidazol-2-yl]acetamide: experimental small molecule (0 associated side effects)

2-(6-methylpyridin-2-yl)-n-pyridin-4-ylquinazolin-4-amine: experimental small molecule (0 associated side effects)

n-1h-indazol-5-yl-2-(6-methylpyridin-2-yl)quinazolin-4-amine: experimental small molecule (0 associated side effects)

known side effects mediated through drugs targeting this protein:

\*\*\*\*\*  
\*\*\*\*\*

Peripheral plasma membrane protein CASK - Group: Enzyme

Treated with:

formic acid: experimental small molecule (0 associated side effects)

known side effects mediated through drugs targeting this protein:

\*\*\*\*\*  
\*\*\*\*\*

Folate receptor gamma - Group: Receptor

Treated with:

folic acid: approved, nutraceutical small molecule (0 associated side effects) For treatment of folic acid deficiency, megaloblastic anemia and in anemias of nutritional supplements, pregnancy, infancy, or childhood.

known side effects mediated through drugs targeting this protein:



\*\*\*\*\*  
\*\*\*\*\*

G protein-activated inward rectifier potassium channel 2 - Group:  
Channel

Treated with:

halothane: approved small molecule (10 associated side effects)  
For the induction and maintenance of general anesthesia

10 known side effects mediated through drugs targeting this protein:  
Arrhythmia Cardiac arrest Chills Hepatic necrosis  
Hyperpyrexia Hypotension Nausea Necrosis Respiratory  
arrest Vomiting

\*\*\*\*\*  
\*\*\*\*\*

Solute carrier organic anion transporter family member 3A1 - Group:  
Transporter

Treated with:

conjugated estrogens: approved small molecule (219 associated  
side effects) For the treatment of moderate to severe vasomotor  
symptoms associated with the menopause, atrophic vaginitis,  
osteoporosis, hypoestrogenism due to hypogonadism, castration,  
primary ovarian failure, breast cancer (for palliation only), and  
Advanced androgen-dependent carcinoma of the prostate (for  
palliation only)

aminohippurate: approved small molecule (0 associated side  
effects) Used to measure effective renal plasma flow (ERPF) and to  
determine the functional capacity of the tubular excretory  
mechanism.

methotrexate: approved small molecule (209 associated side  
effects) For the treatment of gestational choriocarcinoma,  
chorioadenoma destruens and hydatidiform mole. Also for the  
treatment of severe psoriasis and severe, active, classical or  
definite rheumatoid arthritis.

alprostadil: approved small molecule (0 associated side  
effects) For palliative, not definitive, therapy to temporarily  
maintain the patency of the ductus arteriosus until corrective or  
palliative surgery can be performed in neonates who have congenital  
heart defects and who depend upon the patent ductus for survival.  
Also for the treatment of erectile dysfunction due to neurogenic,  
vasculogenic, psychogenic, or mixed etiology.

dinoprostone: approved small molecule (0 associated side  
effects) For the termination of pregnancy during the second  
trimester (from the 12th through the 20th gestational week as  
calculated from the first day of the last normal menstrual period),  
as well as for evacuation of the uterine contents in the management  
of missed abortion or intrauterine fetal death up to 28 weeks of  
gestational age as calculated from the first day of the last normal  
menstrual period. Also used in the management of nonmetastatic  
gestational trophoblastic disease (benign hydatidiform mole). Other  
indications include improving the cervical inducibility (cervical  
"ripening") in pregnant women at or near term with a medical or  
obstetrical need for labor induction, and the management of  
postpartum hemorrhage.

penicillin g: approved small molecule (0 associated side effects) For use in the treatment of severe infections caused by penicillin G-susceptible microorganisms when rapid and high penicillin levels are required such as in the treatment of septicemia, meningitis, pericarditis, endocarditis and severe pneumonia.

iloprost: approved small molecule (46 associated side effects) Used for the treatment of pulmonary arterial hypertension.

taurocholic acid:experimental small molecule (0 associated side effects)

372 known side effects mediated through drugs targeting this protein:

5q minus syndrome  
Abdominal discomfort Abdominal distension  
Abdominal pain Abscess Acne Acute coronary syndrome  
Affect lability Aggression Agitation Agranulocytosis  
Alopecia Alveolitis Alveolitis allergic Amenorrhoea  
Anaemia Anaphylactic shock Anaphylactoid reaction  
Angioedema Angiopathy Anxiety Aphasia Aplastic anaemia  
Arterial thrombosis Arthralgia Arthropathy Asthenia  
Asthma Ataxia Azoospermia Azotaemia Back pain  
Benign neoplasm Bladder pain Blindness  
transient Blood albumin decreased Blood alkaline phosphatase  
increased Blood glucose decreased Blood glucose increased  
Blood pressure increased Blood triglycerides increased  
Blood uric acid increased Body temperature increased Bone  
disorder Bone pain Breast discharge Breast discomfort Breast  
disorder Breast enlargement Breast mass Breast neoplasm  
Breast pain Breast swelling Breast tenderness Bronchitis  
Bronchospasm Candidiasis Carbohydrate tolerance decreased  
Cardiac failure Cardiac failure congestive Cell death  
Cerebral artery thrombosis Cerebral thrombosis  
Cerebrovascular accident Cervical discharge Cervix  
disorder Chest pain Chills Chloasma Chorea Cognitive  
disorder Colitis ischaemic Coma Confusional state Conjunctivitis  
Connective tissue disorder Constipation Convulsion  
Coronary artery thrombosis Cough Cryptococcosis Cyanosis  
Cystitis Cystitis noninfective Cytomegalovirus infection  
Death Decreased appetite Deep vein thrombosis Dementia  
Dental plaque Depression Dermatitis Dermatitis exfoliative  
Diabetes mellitus Diarrhoea Discomfort Dizziness Drug  
interaction Dry eye Dysarthria Dysgeusia Dysmenorrhoea  
Dyspepsia Dysplasia Dyspnoea Dysuria Ear pain  
Ecchymosis Ectropion of cervix Effusion Embolism  
Embolism venous Encephalopathy Endometrial cancer  
Endometrial hypertrophy Endometriosis Enteritis  
Eosinophilia Epilepsy Epistaxis Erectile dysfunction  
Erythema Erythema multiforme Erythema nodosum  
Extravasation Eye disorder Fatigue Febrile  
neutropenia Feeling abnormal Fibrocystic breast disease Fibrosis  
Flatulence Fluid retention Flushing Folliculitis  
Furuncle Galactorrhoea Gallbladder disorder Gamma-  
glutamyltransferase increased Gastrointestinal disorder  
Gastrointestinal pain Gastrointestinal toxicity Generalised  
oedema Genital discharge Gingival bleeding Gingivitis Glossitis

Glossodynia Glucose tolerance decreased Glucose tolerance  
 impaired Gynaecomastia Haemangioma Haematemesis Haematocrit  
 decreased Haematuria Haemoglobin Haemoptysis Haemorrhage  
 Haemorrhagic disorder Headache Hemiparesis Hepatic cirrhosis  
 Hepatic enzyme increased Hepatic failure Hepatic function  
 abnormal Hepatitis acute Hepatobiliary disease Herpes virus  
 infection Herpes zoster Hirsutism Histoplasmosis  
 Hyperbilirubinaemia Hypercalcaemia Hyperglycaemia  
 Hyperhidrosis Hyperlipidaemia Hypernatraemia  
 Hypersensitivity Hypertension Hypertonia  
 Hypertriglyceridaemia Hypertrophy Hyperuricaemia  
 Hypoaesthesia Hypocalcaemia Hypogammaglobulinaemia  
 Hypotension Hypothyroidism Ill-defined disorder Infarction  
 Infection Infertility Inflammation Influenza Injection  
 site pain Insomnia Interstitial lung disease Intra-uterine  
 death Irritability Jaundice Jaundice cholestatic Laboratory  
 test abnormal Lacrimal disorder Lacrimation increased Laryngitis  
 Leiomyoma Lethargy Leukoencephalopathy Leukopenia Liver  
 function test abnormal Loss of consciousness Loss of libido Lung  
 disorder Lung infection Lymphadenopathy Lymphoma  
 Lymphoproliferative disorder Maculopathy Malaise Mass  
 Melaena Meningioma benign Meningitis Meningitis aseptic  
 Menorrhagia Menstrual disorder Mental disorder  
 Metrorrhagia Migraine Mood swings Mouth ulceration  
 Muscle rigidity Muscle spasms Musculoskeletal discomfort  
 Musculoskeletal pain Musculoskeletal stiffness Myalgia  
 Myocardial infarction Nausea Neck pain Necrosis  
 Neoplasm Neoplasm malignant Nephropathy Nerve root lesion  
 Nervous system disorder Nervousness Neuritis Neuropathy  
 peripheral Neutropenia Nipple pain Nocardiosis Nodule Nuchal  
 rigidity Obstruction Obstructive airways disorder Oedema  
 Oedema peripheral Opportunistic infection Optic neuritis  
 Osteoarthritis Osteonecrosis Osteoporosis Ovarian  
 cancer Pain in extremity Palpitations Pancreatic disorder  
 Pancreatitis Pancytopenia Paraesthesia Paresis  
 Pelvic pain Pericardial effusion Pericarditis Petechiae  
 Pharyngitis Phlebitis Photosensitivity reaction  
 Pigmentation disorder Pleural disorder Pleural effusion  
 Pneumocystis jiroveci pneumonia Pneumonia Pneumonia  
 cytomegaloviral Pollakiuria Polyuria Porphyria Precocious  
 puberty Productive cough Protein urine present Proteinuria  
 Pruritus genital Puberty Pulmonary embolism Pulmonary  
 fibrosis Pulmonary function test decreased Pulmonary oedema  
 Pulmonary toxicity Purpura Radiculopathy Rales Rash  
 generalised Renal failure Renal failure acute Renal tubular  
 disorder Respiratory depression Respiratory failure Respiratory  
 tract infection Retinal vein thrombosis Retinitis pigmentosa  
 Rhinitis Sensory loss Sepsis Shock Sinusitis Skin  
 burning sensation Skin exfoliation Skin necrosis Skin ulcer Smear  
 cervix abnormal Soft tissue necrosis Somnolence Speech disorder  
 Spinal cord disorder Stomatitis Subcutaneous nodule  
 Sudden death Supraventricular tachycardia Swelling  
 Syncope Tachycardia Telangiectasia Tenderness Tension  
 Thrombocytopenia Thrombophlebitis superficial Thrombosis  
 Tinnitus Tooth abscess Toxic epidermal necrolysis

Trismus Tumour lysis syndrome Ulcer Upper respiratory tract infection Ureteric obstruction Urethral disorder Urinary tract disorder Urine output increased Urticaria Uterine cancer Uterine cervical erosion Uterine leiomyoma Uterine spasm Vaginal discharge Vaginal haemorrhage Varicose vein Vasculitis Vasodilation procedure Venous thrombosis Vertigo Vision blurred Visual acuity reduced Visual impairment Vomiting Vulvovaginal candidiasis Vulvovaginal mycotic infection Vulvovaginal pruritus Weight increased Wheezing Withdrawal bleed X-linked lymphoproliferative syndrome

\*\*\*\*\*  
\*\*\*\*\*

membrane-associated glucocorticoid-binding protein LAGS - Group: Other

Treated with:

stanozolol: approved small molecule (0 associated side effects)

Stanozolol is a synthetic anabolic steroid with therapeutic uses in treating C1-inhibitor deficient hereditary angioedema. C1-inhibitor is a protease that inhibits the complement system (part of the innate immune system), a biochemical chain of reactions which assists the body in removing pathogens from the body. Stanozolol may help control attacks of hereditary angioedema. Stanozolol can be administered orally or intramuscularly.

known side effects mediated through drugs targeting this protein:

\*\*\*\*\*  
\*\*\*\*\*

Oligopeptide ABC transporter, periplasmic oligopeptide-binding protein - Group: Transporter

Treated with:

formic acid: experimental small molecule (0 associated side effects)

known side effects mediated through drugs targeting this protein:

\*\*\*\*\*  
\*\*\*\*\*

Metabotropic glutamate receptor 3 - Group: Receptor

Treated with:

acamprosate: approved small molecule (212 associated side effects) For the maintenance of abstinence from alcohol in patients with alcohol dependence who are abstinent at treatment initiation

212 known side effects mediated through drugs targeting this protein:

Abdominal distension Abdominal pain Abnormal dreams Abscess  
Acne Acute coronary syndrome Agitation Alanine  
aminotransferase increased Alcoholism Alopecia Amblyopia  
Amnesia Anaemia Angina pectoris Anxiety Apathy  
Arterial occlusive disease Arthralgia Arthritis Ascites  
Aspartate aminotransferase increased Asthenia Asthma  
Back pain Blindness Blister Blood alkaline phosphatase  
increased Blood creatinine increased Blood lactate dehydrogenase

increased Blood uric acid increased Body temperature increased  
 Bronchitis Cardiac failure Cardiomyopathy Chest pain  
 Chills Cholecystitis Colitis Completed suicide  
 Confusional state Constipation Convulsion Cough Deafness  
 Death Decreased appetite Deep vein thrombosis  
 Depersonalisation Dermatitis Dermatitis bullous Dermatitis  
 exfoliative Diabetes mellitus Diarrhoea Diplopia Discomfort  
 Disturbance in sexual arousal Dizziness Dry mouth Dry  
 skin Duodenal ulcer Dysgeusia Dyspepsia Dysphagia Dyspnoea  
 Ecchymosis Eczema Ejaculation disorder Embolism  
 Encephalopathy Endophthalmitis Eosinophilia Epistaxis  
 Erectile dysfunction Eructation Face oedema Feeling abnormal  
 Flat affect Flatulence Gastric disorder Gastric ulcer  
 Gastritis Gastroenteritis Gastrointestinal haemorrhage  
 Gastrointestinal pain Goitre Gout Haematemesis  
 Haematuria Haemoglobin Haemorrhage Hallucination Headache  
 Hepatic cirrhosis Hepatic neoplasm malignant Hepatitis  
 Hernia Hostility Hyperbilirubinaemia Hyperglycaemia  
 Hyperhidrosis Hyperkinesia Hypersensitivity  
 Hypertension Hyperuricaemia Hypoaesthesia  
 Hyponatraemia Hypotension Hypothyroidism Hypovitaminosis  
 Ill-defined disorder Incontinence Increased appetite  
 Infarction Infection Influenza Insomnia Laryngospasm  
 Leukopenia Libido decreased Libido increased Liver function  
 test abnormal Loss of consciousness Lymphadenopathy  
 Lymphocytosis Malaise Mania Melaena Menorrhagia  
 Mental disability Mesenteric occlusion Metrorrhagia  
 Micturition urgency Migraine Monocytosis Mouth ulceration  
 Muscle spasms Muscle twitching Musculoskeletal discomfort  
 Myalgia Myocardial infarction Myopathy Nausea Neck  
 pain Neoplasm malignant Nephrolithiasis Nervousness Neuralgia  
 Neurosis Nocturia Oedema Oedema peripheral  
 Oesophagitis Orthostatic hypotension Pain  
 Palpitations Pancreatitis Panophthalmitis  
 Paraesthesia Paranoia Pharyngitis Phlebitis Photophobia  
 Photosensitivity reaction Pneumonia Pollakiuria Polyuria  
 Pruritus Psoriasis Psychotic disorder Pulmonary  
 embolism Rash Rash maculo-papular Rash pustular Rectal  
 haemorrhage Renal failure Renal failure acute Rheumatoid  
 arthritis Rhinitis Salivary hypersecretion Sexual  
 dysfunction Shock Somnolence Stomatitis Sudden death Suicidal  
 ideation Suicide attempt Syncope Tachycardia Tension  
 Thinking abnormal Thirst Thrombocytopenia Thrombophlebitis  
 Tinnitus Torticollis Tremor Ulcer Urinary incontinence  
 Urinary tract infection Urine output increased Urticaria  
 Vaginal infection Vaginal inflammation Varicose vein  
 Vasodilation procedure Vertigo Visual acuity reduced  
 Visual impairment Vomiting Weight decreased Weight increased  
 Withdrawal syndrome

\*\*\*\*\*  
 \*\*\*\*\*

Prostaglandin F2-alpha receptor - Group: Receptor

Treated with:

travoprost: approved small molecule (62 associated side effects)  
 Ophthalmic solution used for the reduction of elevated

intraocular pressure in patients with open-angle glaucoma or ocular hypertension who are intolerant of other intraocular pressure lowering medications or insufficiently responsive (failed to achieve target IOP determined after multiple measurements over time) to another intraocular pressure lowering medication.

latanoprost: approved small molecule (54 associated side effects) For the reduction of elevated intraocular pressure in patients with open-angle glaucoma or ocular hypertension.

bimatoprost: approved small molecule (90 associated side effects) For the reduction of elevated intraocular pressure in patients with open angle glaucoma or ocular hypertension who are intolerant of other intraocular pressure lowering medications or insufficiently responsive (failed to achieve target IOP determined after multiple measurements over time) to another intraocular pressure lowering medication.

dinoprost tromethamine: approved small molecule (0 associated side effects) Used for aborting second-trimester pregnancy (between the twelfth to eighteenth week of gestation) and in incomplete abortion or for therapeutic abortion in cases of intrauterine fetal death and congenital abnormalities incompatible with life. Also used at low-doses for medically indicated induction of labor at term. Also injected intra-arterially for use as a vasodilator to assist in angiography.

tafluprost: approved small molecule (0 associated side effects) For the treatment of glaucoma (Open Angle) and intraocular hypertension.

135 known side effects mediated through drugs targeting this protein:

Angina pectoris Anxiety Arthritis Asthenia Asthenopia  
Asthma Back pain Bladder pain Blepharitis  
Blepharospasm Blindness Blister Bradycardia Bronchitis  
Burning sensation Cataract Chalazion Chest pain  
Conjunctival disorder Conjunctival haemorrhage  
Conjunctival hyperaemia Conjunctival oedema  
Conjunctivitis Conjunctivitis allergic Corneal erosion  
Corneal oedema Corneal staining Cough Cystitis Cystitis  
noninfective Cystoid macular oedema Dermatitis Dermatitis atopic  
Dermatitis bullous Diabetic retinopathy Diplopia  
Discomfort Dissociation Dizziness Dry eye Dry mouth  
Dyspepsia Dyspnoea Embolism Erythema Erythema of  
eyelid Eye discharge Eye disorder Eye inflammation Eye  
irritation Eye naevus Eye oedema Eye pain Eye pruritus Eye  
swelling Eyelid irritation Eyelid oedema Eyelid pain Eyelids  
pruritus Fatigue Gastrointestinal disorder Growth of  
eyelashes Haemoglobin Haemorrhage Hair growth abnormal Headache  
Hepatic function abnormal Herpes virus infection Hirsutism  
Hordeolum Hyperaemia Hypercholesterolaemia Hypersensitivity  
Hypotension Incontinence Infection Inflammation  
Influenza Insomnia Iritis Keratitis Keratitis  
herpetic Keratopathy Lacrimation increased Lens disorder Liver  
function test abnormal Macular oedema Madarosis Melanocytic  
naevus Nasopharyngitis Nervousness Ocular hyperaemia Oedema  
Oedema peripheral Pain Palpitations Pharyngitis Photophobia  
Pigmentation disorder Prostatic disorder Pruritus

Punctate keratitis Rash Respiratory tract infection  
Retinal artery embolism Retinal detachment Retinal  
disorder Retinal haemorrhage Retinal pigmentation Rhinitis  
Scab Scotoma Sensation of foreign body Sinusitis Skin  
discolouration Skin hyperpigmentation Skin reaction Somnolence  
Swelling Tenderness Tension Toxic epidermal necrolysis  
Trichorrhexis Upper respiratory tract infection Urinary  
incontinence Urinary tract infection Urine abnormalityUrine  
analysis abnormalUveitis Vision blurred Visual acuity reduced  
Visual impairmentVitreous detachment Vitreous floaters  
Vitreous haemorrhage

\*\*\*\*\*  
\*\*\*\*\*

High-affinity choline transporter 1 - Group: Transporter

Treated with:

choline: approved, nutraceutical small molecule (0 associated  
side effects) For nutritional supplementation, also for treating  
dietary shortage or imbalance

known side effects mediated through drugs targeting this protein:

\*\*\*\*\*  
\*\*\*\*\*

Voltage-dependent N-type calcium channel subunit alpha-1B - Group:  
Channel

Treated with:

amlodipine: approved small molecule (136 associated side  
effects) For the treatment of hypertension and chronic stable  
angina.

verapamil: approved small molecule (113 associated side  
effects) For the treatment of hypertension, angina, and cluster  
headache prophylaxis.

gabapentin: approved small molecule (456 associated side  
effects) For the management of postherpetic neuralgia in adults  
and as adjunctive therapy in the treatment of partial seizures with  
and without secondary generalization in patients over 12 years of  
age with epilepsy.

levetiracetam: approved small molecule (157 associated side  
effects) Used as adjunctive therapy in the treatment of partial  
onset seizures in adults and children 4 years of age and older with  
epilepsy.

536 known side effects mediated through drugs targeting this  
protein:

Abdominal discomfort Abdominal pain Abdominal pain upper  
Abnormal behaviour Abnormal dreams Abnormal faeces  
Abscess Accommodation disorder Acne Acute coronary  
syndrome Affect lability Ageusia Aggression Agitation  
Albuminuria Alcohol intolerance Alopecia Altered state of  
consciousness Amblyopia Amenorrhoea Amnesia Anaemia  
Anaphylactic shock Angina pectoris Angioedema Angiopathy  
Anorectal disorder Antisocial behaviour Antisocial  
personality disorder Anuria Anxiety Aortic dissection  
Apathy Aphasia Apnoea Apraxia Areflexia  
Arrhythmia Arthralgia Arthritis Arthropathy Asocial behaviour

Aspiration Asthenia Asthma Ataxia Atrial  
 fibrillation Atrioventricular block Atrioventricular block  
 complete Atrioventricular dissociation Aura Back pain  
 Balance disorder Bladder pain Bleeding time prolonged  
 Blindness Blister Blood alkaline phosphatase increased  
 Blood lactate dehydrogenase increased Blood pressure  
 increased Blood prolactin increased Blood urea abnormal Body  
 temperature increased Bone pain Bradycardia Breast cancer  
 Breast enlargement Breast pain Bronchitis Bronchospasm  
 Bursitis Candidiasis Capillary fragility increased  
 Cardiac disorder Cardiac failure congestive Cardiac  
 fibrillation Cardiomyopathy Cardiovascular disorder  
 Cataract Cellulitis Central nervous system neoplasm  
 Cerebellar syndrome Cerebrovascular accident Cheilitis  
 Chest pain Chills Cholecystitis Cholelithiasis  
 Cholestasis Choreoathetosis Chorioretinitis Chronic  
 obstructive pulmonary disease Coagulopathy Cold sweat  
 Colitis Coma Completed suicide Confusional state  
 Conjunctival hyperaemia Conjunctivitis Connective tissue  
 disorder Constipation Conversion disorder Convulsion  
 Coordination abnormal Corneal disorder Costochondritis Cough  
 Cushingoid Cystitis Cystitis noninfective Dandruff  
 Deafness Decreased appetite Deep vein thrombosis  
 Dehydration Dependence Depersonalisation Depressed level of  
 consciousness Depressed mood Depressive symptom Dermatitis  
 Dermatitis bullous Diabetes mellitus Diabetic ketoacidosis  
 Diabetic retinopathy Diaphragmatic hernia Diarrhoea  
 Diplopia Discomfort Dissociation Disturbance in  
 attention Disturbance in sexual arousal Dizziness postural  
 Drug abuse Drug level increased Drug withdrawal convulsions  
 Dry eye Dry mouth Dry skin Dry throat Duodenal ulcer  
 Dysaesthesia Dysarthria Dysgeusia Dyskinesia  
 Dysmenorrhoea Dyspepsia Dysphagia Dysphonia Dyspnoea  
 Dystonia Dysuria Ear infection Ear pain Ecchymosis  
 Eczema Effusion Ejaculation disorder Electrocardiogram  
 abnormal Embolism Encephalopathy Epididymitis Epistaxis  
 Erectile dysfunction Eructation Erythema Erythema  
 multiforme Euphoric mood Eustachian tube disorder Extensor  
 plantar response Extrapylamidal disorder Extrasystoles Eye  
 disorder Eye haemorrhage Eye pain Eye pruritus Eyelid  
 ptosis Face oedema Faecal incontinence Fatigue Feeling  
 abnormal Feeling cold Flat affect Flatulence Fluid retention  
 Flushing Fungal infection Fungal skin infection Furuncle  
 Gait disturbance Galactorrhoea Gamma-glutamyltransferase  
 increased Gastritis Gastroenteritis Gastrointestinal disorder  
 Gastrointestinal pain Generalised oedema Genital discharge  
 Gingival bleeding Gingival hyperplasia Gingivitis Glaucoma  
 Glossitis Glycosuria Goitre Gout Grand mal convulsion  
 Gynaecomastia Haematemesis Haematochezia Haematoma  
 Haematuria Haemoglobin Haemoptysis Haemorrhage intracranial  
 Haemorrhoids Hair disorder Hallucination Hangover  
 Headache Hearing impaired Hemiplegia Hepatic enzyme  
 increased Hepatic failure Hepatic function abnormal Hepatitis  
 Hepatitis cholestatic Hepatitis fulminant Hepatobiliary  
 disease Hepatomegaly Hernia Herpes simplex Herpes



virus infection Herpes zoster Hiccups Hirsutism Hordeolum  
Hostility Hot flush Hyperaemia Hyperaesthesia  
Hypercholesterolaemia Hyperglycaemia Hyperhidrosis  
Hyperkeratosis Hyperkinesia Hyperlipidaemia Hyperplasia  
Hyperprolactinaemia Hyperreflexia Hypersensitivity  
Hypersomnia Hypertension Hypertonia Hypertrophic  
cardiomyopathy Hypertrophy Hyperventilation Hypoaesthesia  
Hypoglycaemia Hypokinesia Hyponatraemia Hyporeflexia  
Hypotension Hypothyroidism Hypotonia Hypoventilation  
Hypoxia Ileus paralytic Ill-defined disorder Immune  
system disorder Incontinence Increased appetite Infarction  
Infection Infectious mononucleosis Infestation Influenza  
Inner ear disorder Insomnia Intentional self-injury  
Intermittent claudication Interstitial lung disease  
Intestinal functional disorder Intestinal obstruction  
Intestinal ulcer Iritis Irritability Irritable bowel  
syndrome Ischaemia Jaundice Joint stiffness Joint swelling  
Ketoacidosis Labyrinthitis Lacrimation increased  
Laryngitis Laryngospasm Lethargy Leukopenia Libido  
decreased Libido increased Lip haemorrhage Liver function test  
abnormal Loss of consciousness Loss of libido Lung disorder  
Lymphadenopathy Lymphocytosis Lymphoma Macule Major  
depression Malaise Mania Mass Mediastinal disorder Melaena  
Melanosis Memory impairment Meningism Menopausal symptoms  
Menorrhagia Menstrual disorder Mental disability Mental  
disorder Micturition disorder Micturition urgency Migraine  
Miosis Mood swings Mouth ulceration Movement disorder  
Mucosal inflammation Mucous membrane disorder Muscle  
contracture Muscle fatigue Muscle relaxant therapy Muscle  
spasms Muscle twitching Muscular weakness Musculoskeletal  
discomfort Musculoskeletal stiffness Myalgia Myocardial  
infarction Myoclonus Nail disorder Nasal congestion Nasal  
obstruction Nasopharyngitis Nausea Neck mass Neck pain  
Necrosis Neoplasm Neoplasm malignant Nephrolithiasis  
Nephrotic syndrome Nervous system disorder Nervousness  
Neuropathy peripheral Neurosis Neutropenia Nocturia  
Nodule Nystagmus Obstruction Obstructive airways disorder  
Occipital neuralgia Oedema Oedema peripheral Oesophageal  
disorder Oesophageal spasm Oesophagitis Oligomenorrhoea Oral  
candidiasis Oropharyngeal pain Orthostatic hypotension  
Osteoarthritis Osteoporosis Otitis externa Otitis  
media Ovarian failure Pain Pain in extremity Palpitations  
Pancreatitis Pancytopenia Papule Paraesthesia  
Paraesthesia oral Paralysis Paranoia Paresis Parosmia  
Partial seizures Pelvic pain Penile swelling Penis disorder  
Peptic ulcer Pericardial effusion Pericardial rub  
Pericarditis Peripheral ischaemia Peripheral vascular  
disorder Personality disorder Pharyngitis Phlebitis Photophobia  
Photosensitivity reaction Pneumonia aspiration Pollakiuria  
Polyuria Proctitis Prothrombin level decreased Pruritus  
Pruritus genital Pseudolymphoma Psoriasis Psychiatric  
symptom Psychotic disorder Pulmonary embolism Pulmonary  
function test decreased Pulmonary oedema Pulmonary thrombosis  
Purpura Pyelonephritis Pyuria Quadriparesis Rash  
Rash erythematous Rash maculo-papular Rash pustular

Rectal haemorrhage      Renal failure acute      Renal impairment  
 Renal pain    Respiratory depression    Respiratory failure  
 Respiratory tract infection    Retinal degeneration      Retinal  
 disorder      Retinal vein thrombosis      Rhinitis      Rhinitis seasonal  
 Salivary gland enlargement      Salivary hypersecretion  
 Scotoma      Scrotal disorder    Scrotal swelling    Seasonal allergy  
 Seborrhoeic dermatitis    Sedation      Sensory loss      Sepsis  
 Sexual dysfunction      Shock    Sinus arrest      Sinusitis    Skin  
 cancer      Skin discolouration      Skin disorder      Skin exfoliation  
 Skin hypertrophy    Skin necrosis      Skin odour abnormal      Skin  
 ulcer    Sleep disorder      Snoring      Somnambulism      Somnolence  
 Speech disorder      Status epilepticus      Sticky skin    Stomatitis  
 Strabismus    Stupor      Subcutaneous nodule      Subdural  
 haematoma    Suicidal behaviour      Suicidal ideation    Suicide attempt  
 Supraventricular extrasystoles      Swelling      Syncope  
 Tachycardia    Tendon disorder      Tendonitis    Tension      Testicular  
 pain      Thinking abnormal    Thirst      Thrombocytopenia    Thrombophlebitis  
 Thrombosis    Tinnitus      Tongue disorder      Tooth abscess      Tooth  
 discolouration      Tooth disorder      Tremor      Ulcer    Upper respiratory  
 tract infection      Urethral disorder    Urinary incontinence      Urinary  
 retention      Urinary tract disorder    Urinary tract infection      Urine  
 abnormality    Urine analysis abnormal      Urine output increased  
 Urticaria      Uterovaginal prolapse      VIIth nerve paralysis  
 Vaginal haemorrhage      Varicose vein      Vascular purpura  
 Vasculitis    Vasodilation procedure    Venous thrombosis    Ventricular  
 extrasystoles      Ventricular tachycardia      Vertigo      Vestibular  
 disorder      Viral diarrhoea      Viral infection      Vision blurred  
 Visual acuity reduced      Visual impairment    Vomiting  
 Vulvovaginal candidiasis      Vulvovaginal mycotic infection  
 Vulvovaginal pain    Weight decreased      Weight increased      White blood  
 cell count decreased      Xerophthalmia

\*\*\*\*\*  
 \*\*\*\*\*

Macrophage mannose receptor 1-like protein 1 - Group: Receptor

Treated with:

o3-sulfonylgalactose:    experimental      small molecule      (0  
 associated side effects)  
 acetylgalactosamine-4-sulfate:      experimental      small molecule  
 (0 associated side effects)  
 alpha-methyl-n-acetyl-d-glucosamine:      experimental      small  
 molecule      (0 associated side effects)

known side effects mediated through drugs targeting this protein:

\*\*\*\*\*  
 \*\*\*\*\*

Potassium channel subfamily K member 9 - Group: Channel

Treated with:

doxapram: approved      small molecule      (47 associated side effects)

For use as a temporary measure in hospitalized patients with acute respiratory insufficiency superimposed on chronic obstructive pulmonary disease.

halothane: approved      small molecule      (10 associated side effects)

For the induction and maintenance of general anesthesia

55 known side effects mediated through drugs targeting this protein:

Agitation Albuminuria Anxiety Arrhythmia Blood pressure  
increased Body temperature increased Bronchospasm Cardiac  
arrest Cardiac fibrillation Cardiovascular disorder Chest  
discomfort Chest pain Chills Clonus Convulsion Cough  
Diarrhoea Disorientation Dizziness Dyskinesia Dyspnoea  
Feeling hot Flushing Haemolysis Hallucination Headache  
Hepatic necrosis Hiccups Hyperhidrosis Hyperkinesia  
Hyperpyrexia Hyperreflexia Hyperventilation Hypotension  
Hypoventilation Hypoxia Laryngospasm Leukopenia  
Muscle contractions involuntary Muscle spasticity Mydriasis  
Nausea Necrosis Pain Paraesthesia Phlebitis  
Pruritus Respiratory arrest Respiratory failure  
Tachycardia Tachypnoea Urinary retention Ventricular  
fibrillation Ventricular tachycardia Vomiting

\*\*\*\*\*  
\*\*\*\*\*

Potassium channel subfamily K member 6 - Group: Channel

Treated with:

ibutilide: approved small molecule (53 associated side effects)

Indicated for the rapid conversion of atrial fibrillation or  
atrial flutter of recent onset to sinus rhythm.

quinidine: approved small molecule (146 associated side  
effects) For the treatment of ventricular pre-excitation and  
cardiac dysrhythmias

172 known side effects mediated through drugs targeting this  
protein:

Abdominal discomfort Abdominal pain Agitation Agranulocytosis  
Anaemia Angina pectoris Angioedema Anxiety Aphasia  
Aplastic anaemia Arthralgia Asthenia Asthma Ataxia  
Atrial fibrillation Atrioventricular block first degree  
Atrioventricular block second degree Azotaemia Blindness  
Blood creatine phosphokinase increased Blood creatinine  
increased Blood urea increased Body temperature increased  
Bradycardia Bronchospasm Bundle branch block Cardiac  
arrest Cardiac failure Cardiac failure congestive Cardiac  
fibrillation Cerebral ischaemia Cerebrovascular accident  
Chest pain Chills Coagulopathy Coma Completed suicide  
Confusional state Constipation Convulsion Cutaneous  
vasculitis Deafness Decreased appetite Delirium Dermatitis  
bullous Dermatitis contact Dermatitis exfoliative Diarrhoea  
Diplopia Disorientation Disseminated intravascular  
coagulation Dizziness Drug eruption Drug interaction Dyspepsia  
Dyspnoea Dystonia Ecchymosis Electrocardiogram abnormal  
Electrocardiogram normal Erythema Erythema multiforme  
Extrasystoles Fatigue Feeling abnormal Flushing  
Gastrointestinal pain Granulomatous liver disease Haemoglobin  
decreased Haemoglobinuria Haemolytic anaemia Haemolytic  
uraemic syndrome Haemorrhage Headache Hearing impaired Hepatic  
function abnormal Hepatitis Hyperhidrosis Hypersensitivity  
Hypertension Hypocalcaemia Hypoglycaemia  
Hypokalaemia Hypomagnesaemia Hypoprothrombinaemia  
Hypotension Idiopathic thrombocytopenic purpura Ileus  
Infection Insomnia Ischaemia Jaundice Leukocytosis

Leukopenia Liver function test abnormal Loss of consciousness  
 Lymphadenopathy Mental disorder Muscle spasms Muscular  
 weakness Musculoskeletal discomfort Myalgia Mydriasis  
 Nausea Necrosis Nephritis Nervousness Neuritis  
 Neuropathy peripheral Neutropenia Night blindness Nodal  
 arrhythmia Nodule Oedema Oesophagitis Optic neuritis  
 Orthostatic hypotension Pain Palpitations  
 Pancytopenia Petechiae Photophobia Photosensitivity  
 reaction Pigmentation disorder Plasmodium falciparum infection  
 Platelet disorder Pneumonia Pruritus Pulmonary oedema  
 Purpura Rash Renal failure Renal impairment Rhythm  
 idioventricular Scotoma Shock Sicca syndrome Sinus bradycardia  
 Sinus tachycardia Social avoidant behaviour Sudden visual  
 loss Supraventricular extrasystoles Supraventricular tachycardia  
 Syncope Systemic lupus erythematosus Tachyarrhythmia  
 Tachycardia Tension Thought blocking Thrombocytopenia  
 Thrombocytopenic purpura Thrombotic thrombocytopenic  
 purpura Tinnitus Torsade de pointes Toxic epidermal  
 necrolysis Tremor Tubulointerstitial nephritis Urinary tract  
 infection Urticaria Uveitis Vascular purpura Vascular  
 resistance systemic Vasculitis Vasodilation procedure Ventricular  
 arrhythmia Ventricular extrasystoles Ventricular fibrillation  
 Ventricular tachycardia Vertigo Vision blurred  
 Visual impairment Vomiting

\*\*\*\*\*  
 \*\*\*\*\*

Interleukin-2 receptor alpha chain - Group: Receptor

Treated with:

denileukin diftitox: approved biotech (0 associated side effects)  
 For treatment of cutaneous T-cell lymphoma

aldesleukin: approved biotech (0 associated side effects)  
 For treatment of adults with metastatic renal cell carcinoma.

basiliximab: approved biotech (0 associated side effects)  
 For prophylactic treatment of kidney transplant rejection

daclizumab: approved biotech (0 associated side effects)

Zenapax is a humanized monoclonal antibody used for prevention  
 of renal transplant rejection

known side effects mediated through drugs targeting this protein:

\*\*\*\*\*  
 \*\*\*\*\*

D(4) dopamine receptor - Group: Receptor

Treated with:

ziprasidone: approved small molecule (251 associated side effects)  
 For the treatment of schizophrenia and related psychotic disorders.

cabergoline: approved small molecule (96 associated side effects)  
 For the treatment of hyperprolactinemic disorders, either idiopathic or due to prolactinoma (prolactin-secreting adenomas).  
 May also be used to manage symptoms of Parkinsonian Syndrome as monotherapy during initial symptomatic management or as an adjunct to levodopa therapy during advanced stages of disease.

ropinirole: approved small molecule (631 associated side effects)  
 For the treatment of the signs and symptoms of idiopathic

Parkinson's disease. Also used for the treatment of restless legs syndrome.

olanzapine: approved small molecule (393 associated side effects) For the acute and maintenance treatment of schizophrenia and related psychotic disorders, as well as acute treatment of manic or mixed episodes of bipolar I disorder. Intramuscular olanzapine is indicated for the rapid control of agitated patients.

clozapine: approved small molecule (228 associated side effects) For use in patients with treatment-resistant schizophrenia.

thiethylperazine: approved small molecule (0 associated side effects) For the treatment or relief of nausea and vomiting.

remoxipride: approved, withdrawn small molecule (0 associated side effects) Remoxipride is an atypical antipsychotic once used for the treatment of schizophrenia.

pramipexole: approved small molecule (620 associated side effects) For the treatment of signs and symptoms of idiopathic Parkinson's disease

promazine: approved small molecule (0 associated side effects)

Used as an adjunct for short term treatment of moderate and severe psychomotor agitation. Also used to treat agitation or restlessness in the elderly.

lisuride: approved small molecule (0 associated side effects)

For the management of Parkinson's Disease

apomorphine: approved small molecule (45 associated side effects) For the acute, intermittent treatment of hypomobility, off episodes (end-of-dose wearing off and unpredictable on/off episodes) associated with advanced Parkinson's disease.

risperidone: approved small molecule (532 associated side effects) For the treatment of schizophrenia in adults and in adolescents, ages 13 to 17, and for the short-term treatment of manic or mixed episodes of bipolar I disorder in children and adolescents ages 10 to 17. May also be used to manage symptoms of inappropriate behavior due to aggression and/or psychosis in patients with severe dementia.

propiomazine: approved small molecule (0 associated side effects) Propiomazine is largely used for its antihistaminic sleep inducing effects in treating insomnia.

dopamine: approved small molecule (23 associated side effects)

For the correction of hemodynamic imbalances present in the shock syndrome due to myocardial infarction, trauma, endotoxic septicemia, open-heart surgery, renal failure, and chronic cardiac decompensation as in congestive failure

pergolide: approved, withdrawn small molecule (354 associated side effects) Indicated as adjunctive treatment to

levodopa/carbidopa in the management of the signs and symptoms of Parkinson's disease. It was withdrawn from the US and Canadian markets in 2007 due to an increased risk of cardiac valvulopathy.

bromocriptine: approved small molecule (120 associated side effects) For the treatment of galactorrhea due to hyperprolactinemia, prolactin-dependent menstrual disorders and infertility, prolactin-secreting adenomas, prolactin-dependent male hypogonadism, as adjunct therapy to surgery or radiotherapy for acromegaly or as monotherapy in special cases, as monotherapy in early Parkinsonian Syndrome or as an adjunct with levodopa in

advanced cases with motor complications. Bromocriptine has also been used off-label to treat restless legs syndrome and neuroleptic malignant syndrome.

quetiapine: approved small molecule (359 associated side effects) For the treatment of schizophrenia and related psychotic disorders.

aripiprazole: approved small molecule (630 associated side effects) For the treatment of schizophrenia and related psychotic disorders.

paliperidone: approved small molecule (216 associated side effects) For the treatment of schizophrenia.

methotrimeprazine: approved small molecule (0 associated side effects) For the treatment of psychosis, particular those of schizophrenia, and manic phases of bipolar disorder.

rotigotine: approved small molecule (93 associated side effects) For use/treatment in neurologic disorders and parkinson's disease as well as moderate-to-severe primary Restless Legs Syndrome.

1248 known side effects mediated through drugs targeting this protein:

Abasia Abdominal adhesions Abdominal discomfort Abdominal distension Abdominal neoplasm Abdominal pain Abdominal pain lower Abdominal pain upper Abdominal tenderness Abnormal behaviour Abnormal dreams Abnormal faeces Abscess Accommodation disorder Acidosis Acne Actinic keratosis Acute abdomen Acute coronary syndrome Acute lymphocytic leukaemia Acute psychosis Acute tonsillitis Adenocarcinoma Adenoma benign Adhesion Affect lability Affective disorder Ageusia Aggression Agitation Agoraphobia Agranulocytosis Akathisia Akinesia Alanine aminotransferase increased Albright's disease Albuminuria Alcohol intolerance Alkalosis Alopecia Altered state of consciousness Amaurosis fugax Amblyopia Amenorrhoea Amnesia Anaemia Anaemia macrocytic Anaemia megaloblastic Anaphylactic shock Anaphylactoid reaction Aneurysm Anger Angina pectoris Angina unstable Angioedema Angiomyolipoma Angiopathy Angle closure glaucoma Anorectal discomfort Anorectal disorder Anorgasmia Antidiuretic hormone abnormality Antisocial behaviour Antisocial personality disorder Anxiety Aortic dissection Apathy Aphasia Aphthous stomatitis Apnoea Appendicitis Application site reaction Apraxia Arrhythmia Arrhythmia supraventricular Arterial disorder Arterial occlusive disease Arterial stenosis Arteriosclerosis Arteritis Arthralgia Arthritis Arthropathy Ascites Asocial behaviour Aspartate aminotransferase increased Asphyxia Aspiration Asthenia Asthma Ataxia Atelectasis Atrial fibrillation Atrial flutter Atrial septal defect Atrioventricular block first degree Atrioventricular block second degree Atrophy Aura Automatism Azotaemia Back pain Bacterial infection Balance disorder Balanoposthitis Basal cell carcinoma Basophilia Benign intracranial hypertension Benign neoplasm Benign neoplasm of skin Benign prostatic hyperplasia Biliary colic Binge eating Bladder cancer Bladder

disorder    Bladder pain    Blepharitis    Blepharospasm    Blindness  
           Blindness transient    Blister    Blood alkaline phosphatase  
 increased    Blood amylase increased    Blood antidiuretic hormone  
 abnormal    Blood bilirubin increased    Blood cholesterol increased  
           Blood creatine phosphokinase increased    Blood creatinine  
 increased    Blood disorder    Blood electrolytes abnormal    Blood  
 glucose decreased    Blood glucose increased    Blood insulin  
 increased    Blood iron decreased    Blood lactate dehydrogenase  
 increased    Blood phosphorus increased    Blood potassium decreased  
           Blood potassium increased    Blood pressure abnormal    Blood  
 pressure diastolic decreased    Blood pressure fluctuation    Blood  
 pressure increased    Blood pressure systolic decreased    Blood  
 prolactin increased    Blood testosterone decreased    Blood  
 triglycerides increased    Blood triglycerides normal    Blood urea  
 increased    Blood uric acid increased    Blood urine    Blood urine  
 present    Blunted affect    Body temperature decreased    Body  
 temperature increased    Bone disorder    Bone pain    Bone sarcoma  
           Bradycardia    Bradykinesia    Bradyphrenia    Brain neoplasm  
           Brain neoplasm benign    Brain oedema    Breast cancer  
           Breast cyst    Breast discharge    Breast discomfort    Breast disorder  
           Breast disorder female    Breast disorder male    Breast  
 engorgement    Breast enlargement    Breast feeding    Breast neoplasm  
           Breast pain    Breast swelling    Breast tenderness    Breath odour  
           Bronchiolitis    Bronchitis    Bronchopneumonia  
           Bronchopneumopathy    Bronchospasm    Bruxism  
           Buccoglossal syndrome    Bulimia nervosa    Bundle branch block  
           Bundle branch block left    Bundle branch block right  
           Burning sensation    Bursitis    Cachexia    Calculus bladder  
           Calculus urinary    Cancer in remission    Candidiasis  
           Carbohydrate tolerance decreased    Cardiac arrest    Cardiac  
 disorder    Cardiac failure    Cardiac failure congestive    Cardiac  
 fibrillation    Cardiac flutter    Cardiac murmur    Cardiac septal  
 defect    Cardiac valve disease    Cardio-respiratory arrest  
           Cardiomegaly    Cardiomyopathy    Cardiopulmonary failure  
           Cardiovascular disorder    Carotid artery occlusion  
           Carpal tunnel syndrome    Cataplexy    Cataract    Catatonia    Cells  
 in urine    Cellulitis    Cerebral artery embolism    Cerebral atrophy  
           Cerebral haemorrhage    Cerebral infarction    Cerebral  
 ischaemia    Cerebrospinal fluid rhinorrhoea    Cerebrovascular  
 accident    Cerebrovascular disorder    Cervicitis    Cervix carcinoma  
           Chapped lips    Cheilitis    Chest discomfort    Chest pain  
           Chills    Choking    Cholecystitis    Cholecystitis chronic  
           Cholelithiasis    Cholestasis    Chorea    Choreoathetosis  
           Chromaturia    Chronic lymphocytic leukaemia    Chronic  
 obstructive pulmonary disease    Coagulopathy    Coccydynia  
           Cognitive disorder    Cogwheel rigidity    Cold sweat    Colitis  
           Colitis ulcerative    Colon cancer    Colorectal cancer    Coma  
           Completed suicide    Compulsions    Condition aggravated    Conduction  
 disorder    Confusional state    Congenital anomaly    Congenital eye  
 disorder    Congenital foot malformation    Congenital genitourinary  
 abnormality    Conjunctival haemorrhage    Conjunctivitis    Connective  
 tissue disorder    Constipation    Convulsion    Coordination abnormal  
           Corneal lesion    Coronary artery disease    Coronary artery  
 occlusion    Costochondritis    Cough    Crocodile tears syndrome  
           Crying    Cyanosis    Cystitis    Cystitis noninfective

Cytolytic hepatitis      Dandruff      Deafness      Death      Decreased  
 appetite      Decubitus ulcer      Deep vein thrombosis      Deficiency  
 anaemia      Dehydration      Delirium      Delusion      Dementia      Dementia  
 with Lewy bodies      Dental caries      Dependence      Depersonalisation  
 Depressed level of consciousness      Depressed mood      Depression  
 Depressive symptom      Derealisation      Dermal cyst      Dermatitis  
 atopic      Dermatitis bullous      Dermatitis contact      Dermatitis  
 exfoliative      Dermatitis infected      Dermoid cyst      Developmental  
 delay      Diabetes mellitus      Diabetic coma      Diabetic hyperglycaemic coma  
 Diabetic hyperosmolar coma      Diabetic ketoacidosis  
 Diaphragmatic hernia      Diarrhoea      Diplopia      Discomfort  
 Disorientation      Disseminated intravascular coagulation  
 Dissociation      Disturbance in attention      Disturbance in  
 sexual arousal      Diverticulitis      Dizziness      Dizziness exertional  
 Dizziness postural      Drooling      Drug abuse      Drug dependence  
 Drug eruption      Drug hypersensitivity      Drug ineffective      Drug  
 interaction      Drug level increased      Drug withdrawal syndrome      Drug  
 withdrawal syndrome neonatal      Dry eye      Dry mouth      Dry skin      Dry  
 throat      Duodenal ulcer      Duodenal ulcer haemorrhage      Duodenitis  
 Dysarthria      Dysentery      Dysgeusia      Dysgraphia      Dyskinesia  
 Dysmenorrhoea      Dyspepsia      Dysphagia      Dysphemia      Dysphonia  
 Dysphoria      Dyspnoea      Dyspnoea exertional      Dystonia  
 Dysuria      Ear disorder      Ear infection      Ear pain  
 Ecchymosis      Eclampsia      Eczema      Effusion      Ejaculation  
 delayed      Ejaculation disorder      Ejaculation failure      Elastosis  
 perforans      Elderly      Electrocardiogram QRS complex  
 Electrocardiogram QT prolonged      Electrocardiogram ST segment  
 depression      Electrocardiogram ST segment elevation      Electrocardiogram  
 T wave inversion      Electrocardiogram abnormal      Electrocardiogram  
 change      Electroencephalogram abnormal      Electrolyte imbalance  
 Embolism      Emotional distress      Emphysema      Encephalopathy  
 Endocrine disorder      Endometrial cancer      Endometrial  
 neoplasm      Energy increased      Enteritis      Enuresis      Enzyme  
 abnormality      Eosinophil count increased      Eosinophilia  
 Epicondylitis      Epididymitis      Epilepsy      Epistaxis  
 Erectile dysfunction      Eructation      Erythema      Erythema  
 multiforme      Erythromelalgia      Euphoric mood      Exfoliative rash  
 Exostosis      Extrapyrarnidal disorder      Extrasystoles      Eye  
 discharge      Eye disorder      Eye haemorrhage      Eye infection      Eye  
 inflammation      Eye irritation      Eye movement disorder      Eye pain  
 Eye swelling      Eyelid disorder      Eyelid function disorder  
 Eyelid oedema      Eyelid ptosis      Face oedema      Facial pain  
 Facial paresis      Faecal incontinence      Faecalith      Faecaloma  
 Faeces discoloured      Faeces hard      Fasciitis      Fasting  
 Fatigue      Fear      Feeling abnormal      Feeling cold      Feeling hot  
 Feeling jittery      Female sexual dysfunction      Fibroadenoma of  
 breast      Fibrocystic breast disease      Fibrosis      Flank pain      Flat  
 affect      Flatulence      Fluid overload      Fluid retention      Flushing  
 Folliculitis      Formication      Fungal infection      Fungal skin  
 infection      Furuncle      Gait disturbance      Galactorrhoea      Gallbladder  
 cancer      Gallbladder disorder      Gamma-glutamyltransferase  
 increased      Gangrene      Gastric cancer      Gastric disorder      Gastric  
 haemorrhage      Gastric pH decreased      Gastric polyps      Gastric ulcer  
 Gastric ulcer haemorrhage      Gastritis      Gastritis haemorrhagic  
 Gastroenteritis      Gastrointestinal disorder      Gastrointestinal



haemorrhage Gastrointestinal infection Gastrointestinal neoplasm  
 Gastrointestinal obstruction Gastrointestinal pain  
 Gastrointestinal stromal tumour Gastrooesophageal reflux  
 disease Generalised oedema Genital candidiasis Genital  
 discharge Gestational hypertension Gingival bleedingGingival  
 infection Gingival pain Gingivitis Glaucoma Glossitis  
 Glossodynia Glucose tolerance decreased Glucose tolerance  
 impaired Glycosuria Glycosylated haemoglobin increasedGoitre  
 Gout Grand mal convulsion Gravitational oedema Groin pain  
 Gynaecomastia Haemangioma Haematemesis Haematochezia  
 Haematocrit decreased Haematoma Haematuria Haemoglobin  
 Haemoglobin decreased Haemoglobin increased Haemolysis  
 Haemoptysis Haemorrhage Haemorrhage intracranial  
 Haemorrhoids Haemothorax Hallucination Hallucination,  
 auditory Hallucination, visual Hangover Head discomfort Head  
 titubation Headache Hearing impaired Heart disease congenital  
 Heart rate irregular Hemianopia Hemiparesis Hemiplegia  
 Hepatic enzyme increased Hepatic failure Hepatic function  
 abnormal Hepatic neoplasm malignant Hepatic steatosisHepatitis  
 Hepatitis cholestatic Hepatobiliary disease Hepatocellular  
 injury Hepatomegaly Hereditary disorder Hernia  
 Herpes simplex Herpes virus infectionHerpes zoster  
 Hiccups Hirsutism Homicidal ideation Hordeolum  
 Hormone level abnormal Hostility Hot flush Hunger  
 Hydrocephalus Hyperacusis Hyperaemia Hyperaesthesia  
 Hyperbilirubinaemia Hyperchloraemia Hyperchlorhydria  
 Hypercholesterolaemia Hyperglycaemia Hyperhidrosis  
 Hyperinsulinism Hyperkalaemia Hyperkeratosis  
 Hyperkinesia Hyperlipidaemia Hypernatraemia  
 Hyperparathyroidism Hyperphagia Hyperphosphataemia  
 Hyperplasia Hyperprolactinaemia Hyperreflexia  
 Hypersensitivity Hypersexuality Hypersomnia Hypertension  
 Hypertensive crisis Hyperthermia Hyperthyroidism  
 Hypertonia Hypertonic bladder Hypertrichosis  
 Hypertriglyceridaemia Hypertrophy Hyperuricaemia  
 Hyperuricosuria Hyperventilation Hypoaesthesia  
 Hypoaesthesia oral Hypocalcaemia Hypochloraemia  
 Hypocholesterolaemia Hypochromic anaemia Hypoglycaemia  
 Hypogonadism Hypohidrosis Hypokalaemia Hypokinesia  
 Hypomagnesaemia Hypomania Hypomenorrhoea Hyponatraemia  
 Hypophagia Hypoproteinaemia Hyporeflexia Hypotension  
 Hypothermia Hypothyroidism Hypotonia Hypoventilation  
 Hypovitaminosis Hypoxia Idiopathic thrombocytopenic  
 purpura Ileus Ileus paralytic Ill-defined disorder Illusion  
 Immune system disorder Impaired healing Inappropriate  
 antidiuretic hormone secretion Incontinence Increased  
 appetite Induration Infarction Infected cyst Infection  
 Infestation Inflammation Influenza Influenza like illness  
 Inguinal hernia Initial insomnia Injection site mass  
 Injection site pain Injection site reaction Inner ear  
 disorder Insomnia Intention tremor Intentional self-injury  
 Intermittent claudication Interstitial lung disease  
 Intervertebral disc degeneration Intervertebral disc disorder  
 Intervertebral disc protrusion Intervertebral discitis  
 Intestinal functional disorder Intestinal obstruction

Intestinal perforation Intracranial pressure increased Iron  
 deficiency Iron deficiency anaemia Irritability Irritable  
 bowel syndrome Ischaemia Ischaemic hepatitis Ischaemic stroke  
 Jaundice Jaundice cholestatic Joint contracture Joint  
 effusion Joint range of motion decreased Joint stiffness Joint  
 swelling Judgement impaired Keratitis Keratoconjunctivitis  
 sicca Ketoacidosis Ketosis Laboratory test abnormal  
 Lacrimal disorder Lacrimation increased Lactose intolerance  
 Laryngeal cancer Laryngeal disorder Laryngeal neoplasm  
 Laryngeal oedema Laryngitis Laryngospasm Left ventricular  
 failure Leiomyoma Lens disorder Lenticular opacities  
 Lenticular pigmentation Lethargy Leukaemia  
 Leukocytosis Leukoderma Leukopenia Leukoplakia oral  
 Libido decreased Libido increased Lichenoid keratosis Lip  
 and/or oral cavity cancer Lip dry Lip swelling Lipoma  
 Livedo reticularis Liver disorder Liver function test  
 abnormal Liver injury Lividity Lobar pneumonia Localised  
 infection Localised oedema Logorrhoea Loss of consciousness Loss  
 of libido Lower respiratory tract infection Lung cancer metastatic  
 Lung disorder Lung infiltration Lung neoplasm malignant  
 Lymphadenitis Lymphadenopathy Lymphatic disorder  
 Lymphocytic leukaemia Lymphocytosis Lymphoedema Lymphoma  
 Lymphopenia Macular degeneration Macule Maculopathy Major  
 depression Malaise Male sexual dysfunction Malignant  
 melanoma Mania Masked facies Mastitis Mediastinal disorder  
 Melaena Melanocytic naevus Memory impairment Meningitis  
 Menopausal symptoms Menopause Menorrhagia Menstrual  
 disorder Menstruation delayed Menstruation irregular Mental  
 disability Mental disorder Mental retardation Mental status  
 changes Metabolic alkalosis Metastasis Metastatic neoplasm  
 Metrorrhagia Micturition disorder Micturition urgency  
 Middle ear disorder Middle ear effusion Middle insomnia  
 Migraine with aura Migraine without aura Miosis  
 Mitral valve incompetence Mobility decreased  
 Monarthrititis Monocytosis Mood swings Motion sickness Mouth  
 ulceration Movement disorder Multiple myeloma Muscle atrophy  
 Muscle contractions involuntary Muscle contracture  
 Muscle enzyme increased Muscle relaxant therapy  
 Muscle rigidity Muscle spasms Muscle tightness Muscle  
 twitching Muscular weakness Musculoskeletal chest pain  
 Musculoskeletal discomfort Musculoskeletal disorder  
 Musculoskeletal pain Musculoskeletal stiffness Myalgia  
 Myasthenic syndrome Mydriasis Myelitis Myocardial  
 infarction Myocardial ischaemia Myocarditis Myoclonus Myopathy  
 Myopia Myositis Nail disorder Nail infection  
 Narcolepsy Nasal congestion Nasal disorder Nasal dryness  
 Nasal oedema Nasal polyps Nasopharyngitis Nausea  
 Neck pain Necrosis Necrosis ischaemic Neoplasm  
 malignant Neoplasm prostate Neoplasm recurrence Neoplasm skin  
 Nephritis Nephrolithiasis Nephrotic syndrome Nerve root  
 lesion Nervous system disorder Nervousness Neuralgia  
 Neuritis Neurodermatitis Neurogenic bladder Neuroleptic  
 malignant syndrome Neurological symptom Neuroma Neuropathy  
 peripheral Neurosis Neutropenia Neutrophil count decreased  
 Neutrophil count increased Night sweats Nightmare

Nocturia Nodal arrhythmia Nodule Normochromic  
 normocytic anaemia Nuchal rigidity Nystagmus Obesity  
 Obsessive thoughts Obstruction Obstructive airways disorder  
 Ocular hyperaemia Oculogyric crisis Oedema Oedema peripheral  
 Oesophageal carcinoma Oesophageal disorder Oesophageal spasm  
 Oesophageal stenosis Oesophageal ulcer Oesophagitis  
 Oligomenorrhoea Oliguria Onychomycosis Opisthotonus  
 Oral candidiasis Oral neoplasm benign Oral pain Orchitis  
 noninfective Oropharyngeal discomfort Oropharyngeal pain  
 Oropharyngeal spasm Orthostatic hypotension  
 Osteoarthritis Osteoarthropathy Osteodystrophy  
 Osteomyelitis Osteonecrosis Osteopenia Osteoporosis  
 Otitis externa Otitis media Otitis media chronic  
 Ovarian cancer Ovarian cyst Pain Pain in extremity Pain  
 in jaw Pallor Palpitations Pancreatitis acute Panic  
 attack Panic disorder Panic disorder with agoraphobia Panic  
 reaction Papilloma Paraesthesia oral Paralysis Paranoia  
 Parasomnia Paresis Parkinsonian gait Parkinsonism  
 Paronychia Parosmia Pathological fracture Pathological  
 gambling Pelvic pain Penis disorder Peptic ulcer Pericardial  
 effusion Pericarditis constrictive Perineal pain  
 Periodontitis Periorbital oedema Peripheral coldness  
 Peripheral ischaemia Peripheral vascular disorder Peritoneal  
 adhesions Personality disorder Petechiae Pharyngeal erythema  
 Pharyngitis Phlebitis Phlebitis superficial Phobia  
 Phonological disorder Photophobia Photopsia Photosensitivity  
 allergic reaction Photosensitivity reaction Pigmentation disorder  
 Piloerection Pituitary tumour benign Plasmacytoma  
 Platelet count decreased Pleural disorder Pleural effusion  
 Pleural fibrosis Pleurisy Pneumonia Pneumonia aspiration  
 Pneumothorax Poisoning Poliomyelitis Pollakiuria  
 Polycythaemia Polydipsia Polymyalgia rheumatica Polyp  
 Polyuria Post procedural infection Postmenopausal  
 haemorrhage Postural orthostatic tachycardia syndrome Posture  
 abnormal Pre-eclampsia Precocious puberty Premature  
 ejaculation Premenstrual syndrome Presyncope Priapism Proctalgia  
 Productive cough Prolactinoma Prostate cancer Prostatic  
 adenoma Prostatic disorder Prostatitis Protein urine present  
 Proteinuria Protrusion tongue Prurigo Pruritus Pruritus  
 generalised Pruritus genital Pseudolymphoma Psoriasis Psychiatric  
 symptom Psychomotor retardation Psychotic disorder  
 Puberty Pulmonary congestion Pulmonary embolism  
 Pulmonary fibrosis Pulmonary hypertension Pulmonary oedema  
 Purpura Pyelonephritis Pyoderma Pyuria Rales Rash  
 erythematous Rash generalised Rash maculo-papular Rash  
 papular Rash pustular Rash vesicular Raynaud's phenomenon  
 Rectal cancer Rectal haemorrhage Rectal tenesmus Red  
 blood cell count decreased Red blood cell sedimentation rate  
 increased Reflux oesophagitis Regressive behaviour  
 Regurgitation Renal artery stenosis Renal colic Renal cyst  
 Renal failure acute Renal impairment Renal neoplasm Renal  
 pain Respiratory alkalosis Respiratory arrest Respiratory  
 disorder Respiratory distress Respiratory failure Respiratory  
 tract congestion Respiratory tract infection Respiratory tract  
 infection viral Restless legs syndrome Retching Retinal artery

occlusion Retinal detachment Retinal disorder Retinal vascular  
disorder Retinitis pigmentosa Retrograde ejaculation  
Retroperitoneal fibrosis Rhabdomyolysis Rheumatoid  
arthritis Rhinitis Rhinitis allergic Rhinitis seasonal Rhinorrhoea  
Rhonchi Rosacea Rotator cuff syndrome Sacroiliitis  
Saliva altered Salivary duct obstruction Salivary gland  
disorder Salivary gland enlargement Salivary hypersecretion  
Salpingitis Sarcoidosis Sarcoma Scab Schizoaffective  
disorder Schizophrenia Schizophreniform disorder Sciatica  
Scotoma Seasonal allergy Seborrhoeic dermatitis Seborrhoeic  
keratosis Sedation Sensation of heaviness Sensory disturbance  
Sensory loss Sepsis Septic shock Severe acute  
respiratory syndrome Sexual dysfunction Shock Sialoadenitis  
Sicca syndrome Sick sinus syndrome Sinus arrhythmia Sinus  
bradycardia Sinus congestion Sinus disorder Sinus headache Sinus  
tachycardia Sinusitis Skin burning sensation Skin cancer Skin  
discolouration Skin disorder Skin exfoliation Skin  
hyperpigmentation Skin hypertrophy Skin infection Skin irritation  
Skin lesion Skin mass Skin odour abnormal Skin papilloma  
Skin ulcer Sleep apnoea syndrome Sleep attacks Sleep  
disorder Sleep talking Sluggishness Small intestinal  
obstruction Sneezing Snoring Social avoidant behaviour  
Somnambulism Somnolence Speech disorder Spinal  
osteoarthritis Spine malformation Splenomegaly Spondylitis  
Squamous cell carcinoma Status epilepticus Stevens-  
Johnson syndrome Sticky skin Stomatitis Stress Stridor  
Stupor Subarachnoid haemorrhage Subcutaneous abscess  
Subcutaneous nodule Subdural haematoma Sudden death  
Suicidal ideation Suicide attempt Superior sagittal sinus  
thrombosis Supraventricular extrasystoles Supraventricular  
tachycardia Surgery Suspiciousness Swelling Swelling face  
Swollen tongue Syncope Synostosis Synovitis Systemic  
lupus erythematosus Tachycardia Tachypnoea Tardive dyskinesia  
Tenderness Tendonitis Tenosynovitis Tension Tension  
headache Terminal insomnia Testicular disorder Testicular pain  
Tetany Therapeutic response decreased Therapeutic  
response increased Thinking abnormal Thirst Thought blocking  
Throat irritation Throat tightness Thrombocytopenia  
Thrombocytopenic purpura Thrombocytosis Thrombophlebitis  
Thrombosis Thrombotic thrombocytopenic purpura Thyroid  
adenoma Thyroid cancer Thyroid neoplasm Thyroiditis Tic  
Tinnitus Tongue discolouration Tongue disorder Tongue dry  
Tongue oedema Tongue paralysis Tongue spasm Tongue  
ulceration Tonsillar hypertrophy Tonsillitis Tooth abscess Tooth  
disorder Tooth impacted Tooth infection Toothache Torsade de  
pointes Torticollis Toxic epidermal necrolysis Tracheobronchitis  
Transaminases increased Transient ischaemic attack  
Tremor Trismus Tuberculin test positive  
Tubulointerstitial nephritis Ulcer Ulcer haemorrhage Umbilical  
hernia Unevaluable event Unintended pregnancy Unresponsive to  
stimuli Upper respiratory tract infection Upper-airway cough  
syndrome Urethral disorder Urethral pain Urethritis Urinary  
hesitation Urinary incontinence Urinary retention Urinary tract  
disorder Urinary tract infection Urine abnormality Urine  
analysis abnormal Urine output increased Urosepsis Urticaria

Uterine disorder Uterine haemorrhage Uterine leiomyoma  
 Uterine neoplasm Uterovaginal prolapse VIIIth nerve paralysis  
 Vaginal discharge Vaginal haemorrhage Vaginal infection  
 Vaginal inflammation Varicose vein Vascular purpura  
 Vasculitis Vasoconstriction Vasodilation procedure Vasospasm  
 Vein disorder Venous thrombosis Ventricular arrhythmia  
 Ventricular extrasystoles Ventricular failure Ventricular  
 fibrillation Ventricular hypertrophy Ventricular  
 tachycardia Vertigo Vestibular ataxia Vestibular disorder Viral  
 diarrhoea Viral infection Vision blurred Visual acuity reduced  
 Visual impairment Vitamin B12 deficiency Vitreous detachment  
 Vitreous floaters Vocal cord paralysis Vomiting  
 Vulvovaginal candidiasis Vulvovaginal dryness  
 Vulvovaginal mycotic infection Vulvovaginal pruritus  
 Vulvovaginitis Water intoxication Weight decreased  
 Weight fluctuation Weight increased Wheezing White blood  
 cell count decreased White blood cell count increased White blood  
 cells urine positive Withdrawal bleed Withdrawal syndrome Wound  
 infection Xerophthalmia Xerosis Yawning

\*\*\*\*\*  
 \*\*\*\*\*

Interferon-gamma receptor beta chain - Group: Receptor

Treated with:

interferon gamma-1b: approved biotech (0 associated side  
 effects) Interferon gamma-1b is used for the treatment of Chronic  
 granulomatous disease and Osteopetrosis.

known side effects mediated through drugs targeting this protein:

\*\*\*\*\*  
 \*\*\*\*\*

Thyroid hormone receptor beta-1 - Group: Receptor

Treated with:

liothyronine: approved small molecule (0 associated side  
 effects) Used as replacement or supplemental therapy in patients  
 with hypothyroidism of any etiology, except transient hypothyroidism  
 during the recovery phase of subacute thyroiditis.

levothyroxine: approved small molecule (0 associated side  
 effects) For use alone or in combination with antithyroid agents  
 to treat hypothyroidism, goiter, chronic lymphocytic thyroiditis,  
 myxedema coma, and stupor.

dextrothyroxine: approved small molecule (0 associated side  
 effects) Used to lower high cholesterol levels in the blood.

liotrix: approved small molecule (0 associated side effects)

May be used to treat primary, secondary or tertiary  
 hypothyroidism. May also be used to suppress thyroid stimulating  
 hormone (TSH) secretion in patients with simple (nontoxic) goiter,  
 subacute or chronic lymphocytic thyroiditis multinodular goiter, and  
 in the management of thyroid cancer. May be used in conjunction with  
 other antithyroid agents to treat thyrotoxicosis to prevent  
 goitrogenesis and hypothyroidism. May also be used for differential  
 diagnosis of suspected mild hyperthyroidism or thyroid gland  
 autonomy.

[3,5-dibromo-4-(4-hydroxy-3-phenethylcarbamoyl-phenoxy)-phenyl]-acetic acid: experimental small molecule (0 associated side effects)

3,5-dichloro-4-[(4-hydroxy-3-isopropylphenoxy)phenyl]acetic acid: experimental small molecule (0 associated side effects)

2-[4-(4-hydroxy-3-isopropyl-phenoxy)-3,5-dimethyl-phenyl]-2h-[1,2,4]triazine-3,5-dione: experimental small molecule (0 associated side effects)

[4-(4-hydroxy-3-iodo-phenoxy)-3,5-diiodo-phenyl]-acetic acid: experimental small molecule (0 associated side effects)

gc-24: experimental small molecule (0 associated side effects)

{4-[4-hydroxy-3-(1-methylethyl)benzyl]-3,5-dimethylphenoxy}acetic acid: experimental small molecule (0 associated side effects)

1-(4-hexylphenyl)prop-2-en-1-one: experimental small molecule (0 associated side effects)

known side effects mediated through drugs targeting this protein:

\*\*\*\*\*  
\*\*\*\*\*

Substance-P receptor - Group: Receptor

Treated with:

aprepitant: approved small molecule (160 associated side effects) For the prevention of nausea and vomiting associated with highly emetogenic cancer chemotherapy, including high-dose cisplatin (in combination with other antiemetic agents).

ketamine: approved small molecule (35 associated side effects) For use as the sole anesthetic agent for diagnostic and surgical procedures that do not require skeletal muscle relaxation.

vapreotide: approved small molecule (0 associated side effects) For the treatment of esophageal variceal bleeding in patients with cirrhotic liver disease and has also shown efficacy in the treatment of patients with AIDS-related diarrhea.

fosaprepitant: approved small molecule (0 associated side effects) For the prevention of nausea and vomiting associated with highly emetogenic cancer chemotherapy.

183 known side effects mediated through drugs targeting this protein:

Abdominal pain upper Acne Acute coronary syndrome Alanine aminotransferase increased Alopecia Anaemia Anaphylactic shock Angioedema Angiopathy Anxiety Anxiety disorder Aortic dissection Apnoea Arrhythmia Arthralgia Aspartate aminotransferase increased Asthenia Back pain Blood albumin decreased Blood alkaline phosphatase increased Blood bilirubin increased Blood creatinine increased Blood glucose increased Blood potassium decreased Blood urea increased Blood urine Blood urine present Body temperature decreased Body temperature increased Bradycardia Breast disorder Candidiasis Cardiac disorder Chills Clonus Confusional state Conjunctivitis Connective tissue disorder Constipation Convulsion Cough Cyst Decreased appetite Deep vein thrombosis Dehydration Dependence Dermatitis Diabetes mellitus Diarrhoea Diplopia Discomfort Disorientation Dizziness

Drug abuse Dry mouth Duodenal ulcer Dysgeusia Dyspepsia  
 Dysphagia Dysphoria Dyspnoea Dysuria Embolism  
 Enterocolitis Epigastric discomfort Epilepsy Eructation  
 Erythema Eye disorder Fatigue Febrile neutropenia  
 Feeling abnormal Flashback Flatulence Flushing Gastritis  
 Gastrointestinal disorder Gastrointestinal pain  
 Gastroesophageal reflux disease Glaucoma Glycosuria  
 Haematoma Haematuria Haemoglobin decreased Haemorrhage  
 Hallucination Headache Herpes simplex Herpes virus  
 infection Hiccups Hot flush Hyperglycaemia Hyperhidrosis  
 Hypertension Hypoaesthesia Hypokalaemia  
 Hyponatraemia Hypotension Hypothermia Hypovolaemia  
 Hypoxia Ileus Ill-defined disorder Induration Infarction  
 Infection Infestation Inflammation Insomnia  
 Laryngospasm Loss of consciousness Lower respiratory  
 tract infection Lung neoplasm malignant Malaise Mediastinal  
 disorder Menopausal symptoms Mental disorder Mucosal  
 inflammation Mucous membrane disorder Muscle twitching  
 Muscular weakness Musculoskeletal discomfort Musculoskeletal  
 pain Myalgia Myocardial infarction Nausea Neoplasm  
 Neoplasm malignant Nervous system disorder Neuropathy  
 peripheral Neutropenia Neutropenic sepsis Nystagmus Obstruction  
 Obstructive airways disorder Oedema Operative haemorrhage  
 Oropharyngeal pain Pain Palpitations Pelvic pain  
 Peripheral sensory neuropathy Pharyngitis Pneumonia Polyp  
 Post procedural infection Procedural nausea Protein urine  
 present Proteinuria Pulmonary embolism Pulmonary function  
 test decreased Rash Rash morbilliform Renal failure Respiratory  
 depression Respiratory failure Respiratory tract infection  
 Salivary hypersecretion Sepsis Septic shock Shock  
 Sinus tachycardia Small cell lung cancer stage unspecified  
 Stomatitis Syncope Tachycardia Thrombocytopenia Thrombosis  
 Tinnitus Tremor Ulcer Upper respiratory tract infection  
 Urethral disorder Urinary tract disorder Urinary tract  
 infection Urticaria Venous thrombosis Vision blurred Vomiting  
 Weight decreased White blood cell count increased White blood  
 cells urine positive Wound dehiscence

\*\*\*\*\*  
 \*\*\*\*\*

Low-density lipoprotein receptor-related protein 1 - Group: Receptor  
 Treated with:  
 antihemophilic factor: approved biotech (0 associated side  
 effects) For the treatment of hemophilia A, von Willebrand disease  
 and Factor XIII deficiency  
 tenecteplase: approved biotech (0 associated side effects)  
 For treatment of myocardial infarction and lysis of  
 intracoronary emboli  
 coagulation factor ix: approved biotech (0 associated side  
 effects) For treatment of hemophilia (Christmas disease).

known side effects mediated through drugs targeting this protein:

\*\*\*\*\*  
 \*\*\*\*\*

Endothelial protein C receptor - Group: Receptor

Treated with:

drotrecogin alfa: approved biotech (0 associated side effects)  
For reduction of mortality in patients with severe sepsis.  
phosphatidylethanolamine: experimental small molecule (0  
associated side effects)

known side effects mediated through drugs targeting this protein:

\*\*\*\*\*  
\*\*\*\*\*

Ephrin type-B receptor 2 - Group: Enzyme

Treated with:

phosphoaminophosphonic acid-adenylate ester: experimental small  
molecule (0 associated side effects)

known side effects mediated through drugs targeting this protein:

\*\*\*\*\*  
\*\*\*\*\*

Aryl hydrocarbon receptor - Group: Receptor

Treated with:

mexiletine: approved small molecule (101 associated side  
effects) For the treatment of ventricular tachycardia and  
symptomatic premature ventricular beats, and prevention of  
ventricular fibrillation.

nimodipine: approved small molecule (47 associated side effects)

For use as an adjunct to improve neurologic outcome following  
subarachnoid hemorrhage (SAH) from ruptured intracranial berry  
aneurysms by reducing the incidence and severity of ischemic  
deficits.

flutamide: approved small molecule (55 associated side effects)

For the management of locally confined Stage B2-C and Stage D2  
metastatic carcinoma of the prostate

atorvastatin: approved small molecule (195 associated side  
effects) May be used as primary prevention in individuals with  
multiple risk factors for coronary heart disease (CHD) and as  
secondary prevention in individuals with CHD to reduce the risk of  
myocardial infarction (MI), stroke, angina, and revascularization  
procedures. May be used to reduce the risk of cardiovascular events  
in patients with acute coronary syndrome (ACS). May be used in the  
treatment of primary hypercholesterolemia and mixed dyslipidemia,  
homozygous familial hypercholesterolemia, primary  
dysbetalipoproteinemia, and/or hypertriglyceridemia as an adjunct to  
dietary therapy to decrease serum total and low-density lipoprotein  
cholesterol (LDL-C), apolipoprotein B (apoB), and triglyceride  
concentrations, while increasing high-density lipoprotein  
cholesterol (HDL-C) levels.

leflunomide: approved small molecule (192 associated side  
effects) For the management of the signs and symptoms of active  
rheumatoid arthritis (RA) to improve physical function and to slow  
the progression of structural damage associated with the disease.  
Has also been used for the prevention of acute and chronic rejection  
in recipients of solid organ transplants and is designated by the  
FDA as an orphan drug for this use.



ginseng: approved, nutraceutical small molecule (0 associated side effects)

361 known side effects mediated through drugs targeting this protein:

Abdominal discomfort Abdominal pain Abnormal dreams Abscess  
Acne Acute yellow liver atrophy Affect lability Ageusia  
Aggression Agitation Agranulocytosis Alanine  
aminotransferase increased Albuminuria Alopecia Amblyopia  
Amnesia Anaemia Anaemia macrocytic Anaphylactic  
shock Anaphylactoid reaction Angina pectoris Angioedema Anorectal  
discomfort Anorectal disorder Antinuclear antibody positive  
Anxiety Aortic dissection Aphthous stomatitis Arrhythmia  
supraventricular Arthralgia Arthritis Arthropathy Aspartate  
aminotransferase increased Asthenia Asthma Ataxia  
Atrioventricular block Back pain Biliary colic Bladder  
pain Blood alkaline phosphatase increased Blood creatine  
phosphokinase increased Blood disorder Blood lactate  
dehydrogenase increased Blood magnesium decreased Blood urea  
increased Body temperature increased Bone pain Bradycardia  
Breast disorder Breast enlargement Breast neoplasm  
Bronchitis Bursitis Candidiasis Cardiac failure Cardiac  
failure congestive Cardiogenic shock Cardiovascular disorder  
Cataract Cells in urine Cerebral haemorrhage Cheilitis  
Chest pain Cholelithiasis Cholestasis Chromaturia Colitis  
Confusional state Conjunctivitis Connective tissue disorder  
Constipation Convulsion Coordination abnormal Cough  
Cystitis Cystitis noninfective Deafness Death Decreased  
appetite Deep vein thrombosis Deficiency anaemia Dependence  
Dermatitis Dermatitis bullous Dermatitis contact  
Dermatitis exfoliative Diabetes mellitus Diarrhoea Discomfort  
Disseminated intravascular coagulation Disturbance in sexual  
arousal Dizziness Drug abuse Dry eye Dry mouth Dry skin  
Duodenal ulcer Dysgeusia Dyspepsia Dysphagia Dyspnoea  
Dysuria Ecchymosis Eczema Ejaculation disorder  
Encephalitis Encephalopathy Endocrine disorder  
Endometrial sarcoma Enteritis Eosinophilia  
Epididymitis Epistaxis Erectile dysfunction Eructation  
Erythema Erythema multiforme Eye disorder Eye  
haemorrhage Face oedema Fasting Fatigue Feeling abnormal  
Fibrocystic breast disease Fibrosis Flatulence Fluid  
retention Flushing Foetor hepaticus Fungal skin infection  
Gastric disorder Gastric ulcer Gastritis Gastroenteritis  
Gastrointestinal disorder Gastrointestinal haemorrhage  
Gastrointestinal pain Generalised oedema Gingival bleeding  
Gingivitis Glaucoma Glossitis Gout Gynaecomastia  
Haematoma Haematuria Haemoglobin Haemolytic anaemia  
Haemorrhage Haemorrhagic stroke Hair colour changes  
Hallucination Headache Hepatic encephalopathy Hepatic  
enzyme abnormal Hepatic enzyme increased Hepatic failure  
Hepatic function abnormal Hepatic necrosis Hepatitis  
Hepatobiliary disease Hepatocellular injury Hernia  
Herpes simplex Herpes virus infection Herpes zoster  
Hiccups Hormone level abnormal Hot flush Hyperglycaemia  
Hyperhidrosis Hyperkinesia Hyperlipidaemia

Hypersensitivity Hypertension Hyperthyroidism Hypertonia  
 Hypoaesthesia Hypoglycaemia Hypokalaemia  
 Hyponatraemia Hypotension Ill-defined disorder  
 Incontinence Increased appetite Infection Infestation  
 Influenza Insomnia Interstitial lung disease Iron  
 deficiency Iron deficiency anaemia Ischaemic stroke Jaundice  
 Jaundice cholestatic Joint swelling Juvenile arthritis  
 Laboratory test abnormal Leukopenia Libido decreased Liver  
 disorder Liver function test abnormal Loss of consciousness Loss  
 of libido Lung disorder Lung infiltration Lymphadenopathy  
 Lymphoproliferative disorder Malaise Mediastinal disorder  
 Melaena Memory impairment Menopausal symptoms Menstrual  
 disorder Methaemoglobinaemia Metrorrhagia Micturition  
 urgency Migraine Mood swings Mouth ulceration Muscle  
 contracture Muscle fatigue Muscle rigidity Muscle spasms  
 Muscular weakness Musculoskeletal discomfort Musculoskeletal  
 pain Musculoskeletal stiffness Myalgia Myelofibrosis  
 Myeloid metaplasia Myopathy Myositis Nail disorder  
 Nasopharyngitis Nausea Neck pain Necrosis Neoplasm  
 Neoplasm malignant Nephritis Nephrolithiasis Nervous  
 system disorder Nervousness Neuralgia Neuritis Neuropathy  
 peripheral Neutropenia Nightmare Nocturia Nodule Nuchal  
 rigidity Nystagmus Oedema Oedema peripheral Oesophageal  
 disorder Oesophageal ulcer Oesophagitis Opportunistic  
 infection Oral candidiasis Oropharyngeal pain Orthostatic  
 hypotension Osteoarthritis Osteonecrosis Pain Pain in extremity  
 Palpitations Pancreatitis Pancytopenia  
 Paraesthesia Paralysis Parosmia Pelvic pain Peptic  
 ulcer Petechiae Pharyngitis Phlebitis Photosensitivity reaction  
 Platelet count decreased Pneumonia Pollakiuria Proctalgia  
 Proctitis Prostatic disorder Pruritus Psychotic  
 disorder Pulmonary fibrosis Pulmonary toxicity Rash Rash  
 maculo-papular Rectal haemorrhage Rectal tenesmus Refraction  
 disorder Renal vasculitis Respiratory tract infection  
 Rhabdomyolysis Rhinitis Salivary gland enlargement  
 Seborrhoeic dermatitis Sensory loss Sepsis Shock  
 Sinusitis Skin discolouration Skin disorder Skin mass  
 Skin ulcer Sleep disorder Somnolence Speech disorder  
 Stomatitis Subcutaneous nodule Sulphaemoglobinaemia  
 Swelling Syncope Synovitis Tachycardia Tendinous  
 contracture Tenosynovitis Tension Thrombocytopenia Thrombosis  
 Tinnitus Tooth disorder Torticollis Toxic epidermal  
 necrolysis Transient ischaemic attack Tremor Ulcer Upper  
 gastrointestinal haemorrhage Upper respiratory tract infection  
 Urethral disorder Urinary hesitation Urinary incontinence  
 Urinary retention Urinary tract disorder Urinary tract  
 infection Urine colour abnormal Urticaria Uterine haemorrhage  
 VIIth nerve paralysis Vaginal haemorrhage Varicose vein  
 Vasculitis Vasculitis necrotising Vasodilation procedure  
 Vasospasm Venous thrombosis Ventricular arrhythmia Vertigo  
 Vision blurred Visual impairment Vomiting Vulvovaginal  
 candidiasis Vulvovaginal mycotic infection Weight decreased  
 Weight increased Wheezing White blood cells urine positive  
 X-linked lymphoproliferative syndrome

\*\*\*\*\*  
\*\*\*\*\*

Interleukin-6 receptor alpha chain - Group: Receptor

Treated with:

alpha-d-mannose: experimental      small molecule      (0 associated side effects)

known side effects mediated through drugs targeting this protein:

\*\*\*\*\*  
\*\*\*\*\*

Voltage-dependent L-type calcium channel subunit beta-1 - Group: Channel

Treated with:

ibutilide: approved      small molecule      (53 associated side effects)

Indicated for the rapid conversion of atrial fibrillation or atrial flutter of recent onset to sinus rhythm.

nimodipine: approved      small molecule      (47 associated side effects)

For use as an adjunct to improve neurologic outcome following subarachnoid hemorrhage (SAH) from ruptured intracranial berry aneurysms by reducing the incidence and severity of ischemic deficits.

magnesium sulfate: approved      small molecule      (0 associated side effects)      Used for immediate control of life-threatening convulsions in the treatment of severe toxemias (pre-eclampsia and eclampsia) of pregnancy and in the treatment of acute nephritis in children. Also indicated for replacement therapy in magnesium deficiency, especially in acute hypomagnesemia accompanied by signs of tetany similar to those of hypocalcemia. Also used in uterine tetany as a myometrial relaxant.

verapamil: approved      small molecule      (113 associated side effects)      For the treatment of hypertension, angina, and cluster headache prophylaxis.

mibefradil: withdrawn      small molecule      (0 associated side effects)      For the treatment of angina and high blood pressure.

161 known side effects mediated through drugs targeting this protein:

Abdominal discomfort      Abdominal pain      Acne      Acute coronary syndrome      Alanine aminotransferase increased      Alopecia      Anaemia  
Anaphylactic shock      Angioedema      Arthralgia      Asthenia  
Atrioventricular block complete      Atrioventricular block first degree      Atrioventricular block second degree      Atrioventricular dissociation  
Balance disorder      Blindness      Blood alkaline phosphatase increased      Blood creatine phosphokinase increased      Blood creatinine increased      Blood lactate dehydrogenase increased      Blood prolactin increased      Blood urea increased      Bradycardia  
Bronchospasm      Bundle branch block      Cardiac arrest  
Cardiac failure      Cardiac failure congestive      Cardiomyopathy  
Cerebrovascular accident      Chest pain      Cholestasis      Confusional state  
Constipation      Convulsion      Deep vein thrombosis      Depressive symptom  
Dermatitis      Diarrhoea      Diplopia      Discomfort  
Disseminated intravascular coagulation      Dissociation  
Dizziness      Dry mouth      Dyspepsia      Dyspnoea      Ecchymosis  
Electrocardiogram abnormal      Erectile dysfunction      Erythema

Erythema multiforme      Extrapyrarnidal disorder  
 Extrasystoles      Fasting      Fatigue      Feeling abnormal  
 Feeling cold      Fluid retention      Flushing      Galactorrhoea  
 Gastrointestinal disorder      Gastrointestinal haemorrhage  
 Gingival hyperplasia      Gynaecomastia      Haematoma      Haemoglobin  
 decreased      Headache      Hepatic enzyme increased      Hepatic function  
 abnormal      Hepatitis      Hyperhidrosis      Hyperkeratosis      Hyperplasia  
 Hyperprolactinaemia      Hypersensitivity      Hypertension  
 Hypertrophic cardiomyopathy      Hypertrophy      Hypoaesthesia  
 Hyponatraemia      Hypotension      Ileus paralytic      Infection  
 Influenza      Insomnia      Intermittent claudication      Jaundice  
 Joint swelling      Laryngospasm      Lethargy      Leukocytosis  
 Liver function test abnormal      Loss of consciousness      Macule  
 Muscle fatigue      Muscle spasms      Muscular weakness  
 Musculoskeletal discomfort      Myalgia      Myocardial infarction  
 Nausea      Nodal arrhythmia      Nystagmus      Oedema      Oedema  
 peripheral      Oligomenorrhoea      Orthostatic hypotension      Pain  
 Palpitations      Paraesthesia      Paralysis      Pharyngitis  
 Platelet count decreased      Platelet disorder      Pollakiuria  
 Pruritus      Pulmonary oedema      Purpura      Quadripareisis      Rash  
 Rash maculo-papular      Renal failure      Respiratory failure  
 Respiratory tract infection      Rhinitis      Rhythm idioventricular  
 Sensory loss      Shock      Sinus arrest      Sinus bradycardia      Sinus  
 tachycardia      Sinusitis      Sleep disorder      Somnolence      Supraventricular  
 extrasystoles      Supraventricular tachycardia      Syncope  
 Tachyarrhythmia      Tachycardia      Thrombocytopenia      Thrombosis  
 Tinnitus      Tremor      Upper respiratory tract infection  
 Urinary tract infection      Urticaria      Vascular purpura  
 Vasculitis      Vasospasm      Venous thrombosis      Ventricular arrhythmia  
 Ventricular extrasystoles      Ventricular tachycardia  
 Vertigo      Vision blurred      Visual acuity reduced      Visual  
 impairment      Vomiting      Wheezing

\*\*\*\*\*  
 \*\*\*\*\*

Sodium channel protein type 9 subunit alpha - Group: Channel  
 Treated with:  
 ranolazine: approved      small molecule      (63 associated side effects)  
     For the treatment of chronic angina. It should be used in  
 combination with amlodipine, beta-blockers or nitrates.  
 lidocaine: approved      small molecule      (120 associated side  
 effects)      For production of local or regional anesthesia by  
 infiltration techniques such as percutaneous injection and  
 intravenous regional anesthesia by peripheral nerve block techniques  
 such as brachial plexus and intercostal and by central neural  
 techniques such as lumbar and caudal epidural blocks.  
 zonisamide: approved      small molecule      (190 associated side  
 effects)      For use as adjunctive treatment of partial seizures in  
 adults with epilepsy.

283 known side effects mediated through drugs targeting this  
 protein:  
 Abdominal pain      Abnormal dreams      Acidosis      Acne      Acute coronary  
 syndrome      Agitation      Alanine aminotransferase increased      Albuminuria  
     Alopecia      Amblyopia      Amenorrhoea      Anaemia      Anaphylactic  
 shock      Anaphylactoid reaction      Angioedema      Angiopathy      Anterior spinal

artery syndrome Anxiety Aortic dissection Apnoea  
 Arachnoiditis Arthralgia Arthritis Aspartate  
 aminotransferase increased Asthenia Ataxia Atrial  
 fibrillation Atrial flutter Atrioventricular block Back pain  
 Bladder pain Blister Blood creatinine increased Blood  
 lactate dehydrogenase increased Blood urea increased Body  
 temperature increased Bradycardia Bronchospasm Burning sensation  
 Calculus bladder Cardiac arrest Cardiac disorder Cardiac  
 failure Cardiac fibrillation Cardiac flutter Cardiac output  
 decreased Cauda equina syndrome Cerebrovascular accident Chest  
 pain Chills Cholangitis Cholecystitis Cholelithiasis  
 Chromaturia Cognitive disorder Colitis Confusional state  
 Conjunctival hyperaemia Conjunctivitis Constipation  
 Convulsion Coordination abnormal Cough Cranial nerve  
 paralysis Deafness Decreased appetite Dehydration Depressed  
 level of consciousness Dermatitis Dermatitis bullous Diabetes  
 mellitus Diarrhoea Diplegia Diplopia Discomfort Disease  
 progression Disorientation Disturbance in sexual arousal  
 Dizziness Dry mouth Dry skin Duodenal ulcer Duodenitis  
 Dysarthria Dysgeusia Dyskinesia Dyspepsia Dysphagia  
 Dyspnoea Dystonia Dysuria Ecchymosis Eczema  
 Embolism Encephalopathy Enuresis Eosinophilia  
 Erectile dysfunction Erythema Euphoric mood  
 Extrasystoles Extravasation Eye disorder Face oedema  
 Faecal incontinence Fatigue Feeling abnormal Feeling hot  
 Fibrosis Flank pain Flatulence Fluid overload Flushing  
 Gait disturbance Gastritis Gastroenteritis Gastrointestinal  
 disorder Gastrointestinal pain Gingival bleeding Gingival  
 hyperplasia Gingivitis Glaucoma Glossitis Gynaecomastia  
 Haematemesis Haematuria Haemoglobin Haemoptysis Haemorrhage  
 Hallucination Headache Hirsutism Hyperacusis Hyperaemia  
 Hyperaesthesia Hyperhidrosis Hyperkinesia Hyperplasia  
 Hyperreflexia Hypersensitivity Hypertension  
 Hyperthermia Hypertonia Hypoaesthesia Hypoaesthesia  
 oral Hypoglycaemia Hypokinesia Hyponatraemia Hypotension  
 Hypotonia Hypoxia Ill-defined disorder Immune system  
 disorder Immunodeficiency Incontinence Infection Influenza  
 Insomnia Iritis Irritability Jaundice Jaundice  
 cholestatic Laryngeal oedema Laryngospasm Leukoderma Leukopenia  
 Libido decreased Local reaction Loss of consciousness  
 Lymphadenopathy Maculopathy Malaise Mastitis Mediastinal  
 disorder Melaena Meningism Meningitis Menorrhagia Mental  
 disorder Methaemoglobinaemia Microcytic anaemia Micturition  
 urgency Miosis Monoplegia Mouth ulceration Movement disorder  
 Muscle relaxant therapy Muscle rigidity Muscle spasms  
 Muscle twitching Muscular weakness Musculoskeletal discomfort  
 Musculoskeletal stiffness Myalgia Myocardial depression  
 Myoclonus Nausea Nephropathy toxic Nervous system  
 disorder Nervousness Neuritis Neuropathy peripheral Nocturia  
 Nuchal rigidity Nystagmus Oculogyric crisis Oedema  
 Oedema peripheral Oesophagitis Optic nerve disorder  
 Oropharyngeal discomfort Oropharyngeal pain Orthostatic  
 hypotension Osteoarthritis Pain Palpitations Pancytopenia  
 Papule Paraesthesia Paraesthesia oral Paralysis  
 Paraplegia Parosmia Petechiae Pharyngitis Phlebitis

|                         |                           |                        |                      |           |
|-------------------------|---------------------------|------------------------|----------------------|-----------|
| Photophobia             | Pollakiuria               | Polyuria               | Pruritus             | Psychotic |
| disorder                | Pulmonary embolism        |                        | Pulmonary fibrosis   | Pulmonary |
| function test decreased | Rash                      | Rash maculo-papular    | Rash                 |           |
| pustular                | Rectal haemorrhage        | Renal failure          | Renal tubular        |           |
| disorder                | Respiratory arrest        | Respiratory depression | Respiratory          |           |
| disorder                | Respiratory paralysis     | Retinitis pigmentosa   | Rhinitis             |           |
| Scotoma                 | Sensory loss              | Shock                  | Skin exfoliation     | Sneezing  |
| Somnolence              | Speech disorder           | Stomatitis             | Syncope              | Systemic  |
| lupus erythematosus     | Tachycardia               | Tension                | Thirst               |           |
| Thrombocytopenia        | Thrombophlebitis          | Thrombosis             | Tinnitus             |           |
| Tremor                  | Ulcer                     | Urethral disorder      | Urinary incontinence |           |
| Urinary retention       | Urinary tract disorder    | Urine output increased |                      |           |
| Urticaria               | VIIIth nerve paralysis    | Vascular insufficiency |                      |           |
| Venous thrombosis       | Ventricular extrasystoles | Ventricular            |                      |           |
| fibrillation            | Vertical talus            | Vertigo                | Vision blurred       |           |
| Visual impairment       | Vomiting                  | Weight decreased       | Weight increased     |           |

\*\*\*\*\*  
\*\*\*\*\*

5-hydroxytryptamine 2C receptor - Group: Receptor

Treated with:

tramadol: approved small molecule (490 associated side effects) Indicated in the treatment of moderate to severe pain. Consider for those prone to constipation or respiratory depression. Tramadol is used to treat postoperative, dental, cancer, and acute musculoskeletal pain and as an adjuvant to NSAID therapy in patients with osteoarthritis.

ziprasidone: approved small molecule (251 associated side effects) For the treatment of schizophrenia and related psychotic disorders.

methysergide: approved small molecule (69 associated side effects) For the treatment of vascular headache

cabergoline: approved small molecule (96 associated side effects) For the treatment of hyperprolactinemic disorders, either idiopathic or due to prolactinoma (prolactin-secreting adenomas). May also be used to manage symptoms of Parkinsonian Syndrome as monotherapy during initial symptomatic management or as an adjunct to levodopa therapy during advanced stages of disease.

ropinirole: approved small molecule (631 associated side effects) For the treatment of the signs and symptoms of idiopathic Parkinson's disease. Also used for the treatment of restless legs syndrome.

olanzapine: approved small molecule (393 associated side effects) For the acute and maintenance treatment of schizophrenia and related psychotic disorders, as well as acute treatment of manic or mixed episodes of bipolar 1 disorder. Intramuscular olanzapine is indicated for the rapid control of agitated patients.

clozapine: approved small molecule (228 associated side effects) For use in patients with treatment-resistant schizophrenia.

mirtazapine: approved small molecule (272 associated side effects) For the treatment of major depressive disorder.

loxapine: approved small molecule (74 associated side effects)

For the management of the manifestations of psychotic disorders such as schizophrenia

pramipexole: approved small molecule (620 associated side effects) For the treatment of signs and symptoms of idiopathic Parkinson's disease

promazine: approved small molecule (0 associated side effects)  
Used as an adjunct for short term treatment of moderate and severe psychomotor agitation. Also used to treat agitation or restlessness in the elderly.

cyproheptadine: approved small molecule (63 associated side effects) For treatment of perennial and seasonal allergic rhinitis, vasomotor rhinitis, allergic conjunctivitis due to inhalant allergens and foods, mild uncomplicated allergic skin manifestations of urticaria and angioedema, amelioration of allergic reactions to blood or plasma, cold urticaria, dermatographism, and as therapy for anaphylactic reactions adjunctive to epinephrine.

fenfluramine: illicit,withdrawn small molecule (0 associated side effects) For the management of exogenous obesity as a short-term (a few weeks) adjunct in a regimen of weight reduction based on caloric restriction.

lisuride: approved small molecule (0 associated side effects)  
For the management of Parkinson's Disease

trazodone: approved small molecule (194 associated side effects) For the treatment of depression.

apomorphine: approved small molecule (45 associated side effects) For the acute, intermittent treatment of hypomobility, off episodes (end-of-dose wearing off and unpredictable on/off episodes) associated with advanced Parkinson's disease.

risperidone: approved small molecule (532 associated side effects) For the treatment of schizophrenia in adults and in adolescents, ages 13 to 17, and for the short-term treatment of manic or mixed episodes of bipolar I disorder in children and adolescents ages 10 to 17. May also be used to manage symptoms of inappropriate behavior due to aggression and/or psychosis in patients with severe dementia.

propiomazine: approved small molecule (0 associated side effects) Propiomazine is largely used for its antihistaminic sleep inducing effects in treating insomnia.

minaprine: approved small molecule (0 associated side effects)  
For the treatment of depression

tegaserod: withdrawn small molecule (125 associated side effects) Provides relief from the symptoms of irritable bowel syndrome including chronic idiopathic constipation.

doxepin: approved small molecule (210 associated side effects) Labeled indications: depression and insomnia. Unlabeled indications: chronic and neuropathic pain, anxiety, idiopathic urticaria.

nefazodone: approved,withdrawn small molecule (246 associated side effects) For the treatment of depression.

pergolide: approved,withdrawn small molecule (354 associated side effects) Indicated as adjunctive treatment to levodopa/carbidopa in the management of the signs and symptoms of Parkinson's disease. It was withdrawn from the US and Canadian markets in 2007 due to an increased risk of cardiac valvulopathy.

dexfenfluramine: illicit,approved,withdrawn small molecule (0 associated side effects) For the management of obesity including

weight loss and maintenance of weight loss in patients on a reduced calorie diet

bromocriptine: approved small molecule (120 associated side effects) For the treatment of galactorrhea due to hyperprolactinemia, prolactin-dependent menstrual disorders and infertility, prolactin-secreting adenomas, prolactin-dependent male hypogonadism, as adjunct therapy to surgery or radiotherapy for acromegaly or as monotherapy in special cases, as monotherapy in early Parkinsonian Syndrome or as an adjunct with levodopa in advanced cases with motor complications. Bromocriptine has also been used off-label to treat restless legs syndrome and neuroleptic malignant syndrome.

quetiapine: approved small molecule (359 associated side effects) For the treatment of schizophrenia and related psychotic disorders.

aripiprazole: approved small molecule (630 associated side effects) For the treatment of schizophrenia and related psychotic disorders.

chlorprothixene: approved small molecule (0 associated side effects) For treatment of psychotic disorders (e.g. schizophrenia) and of acute mania occurring as part of bipolar disorders.

clomipramine: approved small molecule (349 associated side effects)

paliperidone: approved small molecule (216 associated side effects) For the treatment of schizophrenia.

yohimbine: approved small molecule (0 associated side effects)

Indicated as a sympatholytic and mydriatic. Impotence has been successfully treated with yohimbine in male patients with vascular or diabetic origins and psychogenic origins.

methotrimeprazine: approved small molecule (0 associated side effects) For the treatment of psychosis, particular those of schizophrenia, and manic phases of bipolar disorder.

3,4-methylenedioxymethamphetamine: illicit, experimental small molecule (0 associated side effects) Clinical trials are now testing the therapeutic potential of MDMA for post-traumatic stress disorder (PTSD) and anxiety associated with terminal cancer. MDMA is one of the four most widely used illicit drugs in the U.S.

sertindole: approved, withdrawn small molecule (0 associated side effects) Used in the treatment of schizophrenia.

mianserin: approved small molecule (0 associated side effects) For the treatment of depression.

agomelatine: approved small molecule (0 associated side effects) Agomelatine is indicated for the treatment of major depressive episodes in adults.

1376 known side effects mediated through drugs targeting this protein:

5q minus syndrome  
Abasia  
Abdominal adhesions  
Abdominal discomfort  
Abdominal distension  
Abdominal neoplasm  
Abdominal pain lower  
Abdominal pain upper  
Abdominal tenderness  
Abnormal behaviour  
Abnormal dreams  
Abnormal faeces  
Abortion spontaneous  
Abscess  
Accommodation disorder  
Acidosis  
Acne  
Actinic keratosis  
Acute abdomen  
Acute coronary syndrome  
Acute lymphocytic leukaemia  
Acute myocardial infarction  
Acute psychosis  
Acute tonsillitis  
Adenocarcinoma  
Adenoma benign  
Adhesion



Adjustment disorder    Affect lability    Affective disorder  
 Ageusia    Aggression    Agitation    Agoraphobia    Agranulocytosis  
 Akathisia    Akinesia    Alanine aminotransferase decreased  
 Alanine aminotransferase increased    Albright's disease  
 Albuminuria    Alcohol intolerance    Alkalosis    Alopecia  
 Altered state of consciousness    Amaurosis fugax    Amblyopia  
 Amenorrhoea    Amnesia    Amyotrophic lateral sclerosis  
 Anaemia    Anaemia macrocytic    Anaemia megaloblastic  
 Anaphylactic shock    Anaphylactoid reaction    Aneurysm    Anger  
 Angina pectoris    Angina unstable    Angioedema    Angiomyolipoma  
 Angiopathy    Angle closure glaucoma    Anorectal discomfort  
 Anorectal disorder    Anorgasmia    Anosmia    Antidiuretic  
 hormone abnormality    Antisocial behaviour    Antisocial personality  
 disorder    Anxiety    Aortic aneurysm    Aortic dissection    Aortic  
 embolus    Apathy    Aphasia    Aphthous stomatitis    Aplastic  
 anaemia    Apnoea    Appendicitis    Application site reaction  
 Apraxia    Arrhythmia    Arrhythmia supraventricular    Arterial  
 disorder    Arterial occlusive disease    Arterial stenosis  
 Arteriosclerosis    Arteritis    Arthralgia    Arthritis    Arthropathy  
 Ascites    Asocial behaviour    Aspartate aminotransferase  
 increased    Asphyxia    Aspiration    Asthenia    Asthma    Ataxia  
 Atelectasis    Athetosis    Atrial fibrillation    Atrial flutter  
 Atrial septal defect    Atrioventricular block first degree  
 Atrioventricular block second degree    Atrophy    Aura  
 Automatism    Azotaemia    Back disorder    Back pain    Bacterial  
 infection    Balance disorder    Balanoposthitis    Basal cell carcinoma  
 Basophilia    Benign breast neoplasm    Benign intracranial  
 hypertension    Benign neoplasm    Benign neoplasm of skin  
 Benign prostatic hyperplasia    Biliary colic    Biliary tract  
 disorder    Binge eating    Bipolar I disorder    Bipolar disorder  
 Bladder cancer    Bladder disorder    Bladder pain    Blepharitis  
 Blepharospasm    Blindness    Blindness transient    Blister  
 Blood acid phosphatase increased    Blood alkaline phosphatase  
 increased    Blood amylase increased    Blood antidiuretic hormone  
 abnormal    Blood bilirubin increased    Blood cholesterol increased  
 Blood creatine phosphokinase increased    Blood creatinine  
 increased    Blood electrolytes abnormal    Blood glucose abnormal    Blood  
 glucose decreased    Blood glucose increased    Blood insulin  
 increased    Blood iron decreased    Blood lactate dehydrogenase  
 increased    Blood phosphorus increased    Blood potassium abnormal  
 Blood potassium decreased    Blood potassium increased    Blood  
 pressure abnormal    Blood pressure diastolic decreased    Blood pressure  
 fluctuation    Blood pressure increased    Blood pressure systolic  
 decreased    Blood prolactin increased    Blood sodium increased    Blood  
 testosterone decreased    Blood triglycerides increased    Blood  
 triglycerides normal    Blood urea increased    Blood uric acid  
 increased    Blood urine    Blood urine present    Blunted affect    Body  
 temperature decreased    Body temperature increased    Bone disorder  
 Bone pain    Bone sarcoma    Bradycardia    Bradykinesia  
 Bradyphrenia    Brain neoplasm    Brain neoplasm benign    Brain  
 oedema    Breast cancer    Breast cyst    Breast discharge    Breast  
 discomfort    Breast disorder    Breast disorder female    Breast disorder  
 male    Breast engorgement    Breast enlargement    Breast feeding  
 Breast neoplasm    Breast pain    Breast swelling    Breast tenderness  
 Breath odour    Bronchiolitis    Bronchitis    Bronchopneumonia

Bronchopneumopathy      Bronchospasm      Bruxism  
 Buccoglossal syndrome      Bulimia nervosa      Bundle branch block  
 Bundle branch block left      Bundle branch block right  
 Burning sensation      Bursitis      Cachexia      Calculus bladder  
 Calculus urinary      Cancer in remission      Candidiasis  
 Carbohydrate tolerance decreased      Cardiac arrest      Cardiac  
 disorder      Cardiac failure      Cardiac failure congestive      Cardiac  
 fibrillation      Cardiac flutter      Cardiac murmur      Cardiac septal  
 defect      Cardiac valve disease      Cardio-respiratory arrest  
 Cardiomegaly      Cardiomyopathy      Cardiopulmonary failure  
 Cardiovascular disorder      Carotid artery occlusion  
 Carpal tunnel syndrome      Cataplexy      Cataract      Catatonia      Cells  
 in urine      Cellulitis      Cerebral artery embolism      Cerebral atrophy  
 Cerebral haemorrhage      Cerebral infarction      Cerebral  
 ischaemia      Cerebrospinal fluid rhinorrhoea      Cerebrovascular  
 accident      Cerebrovascular disorder      Cerumen impaction      Cervical  
 dysplasia      Cervicitis      Cervix carcinoma      Change of bowel habit  
 Chapped lips      Cheilitis      Chest discomfort      Chest pain  
 Chills      Chloasma      Choking      Cholecystitis  
 Cholecystitis chronic      Cholelithiasis      Cholestasis      Chorea  
 Choreoathetosis      Chromatopsia      Chromaturia      Chronic  
 lymphocytic leukaemia      Chronic obstructive pulmonary disease  
 Clonus      Coagulopathy      Coccydynia      Cognitive disorder  
 Cogwheel rigidity      Cold sweat      Colitis      Colitis ischaemic  
 Colitis ulcerative      Colon cancer      Colorectal cancer      Coma  
 Completed suicide      Compulsions      Condition aggravated      Confusional  
 state      Congenital anomaly      Congenital eye disorder      Congenital  
 foot malformation      Congenital genitourinary abnormality  
 Conjunctival haemorrhage      Conjunctivitis      Connective tissue  
 disorder      Constipation      Conversion disorder      Convulsion  
 Coordination abnormal      Corneal lesion      Coronary artery  
 disease      Coronary artery occlusion      Costochondritis      Cough  
 Crocodile tears syndrome      Crying      Crystal urine  
 Crystalluria      Cyanosis      Cystitis      Cystitis noninfective  
 Cytolytic hepatitis      Dandruff      Deafness      Deafness  
 transitory      Death      Decreased appetite      Decubitus ulcer      Deep vein  
 thrombosis      Deficiency anaemia      Dehydration      Delirium      Delusion  
 Dementia      Dementia with Lewy bodies      Dental caries  
 Dependence      Depersonalisation      Depressed level of consciousness  
 Depressed mood      Depression      Depressive symptom  
 Derealisation      Dermal cyst      Dermatitis atopic      Dermatitis  
 bullous      Dermatitis contact      Dermatitis exfoliative      Dermatitis  
 infected      Dermoid cyst      Developmental delay      Diabetes mellitus  
 Diabetic coma      Diabetic hyperglycaemic coma      Diabetic  
 hyperosmolar coma      Diabetic ketoacidosis      Diaphragmatic hernia  
 Diarrhoea      Diplopia      Discomfort      Disease progression  
 Disorientation      Disseminated intravascular coagulation  
 Dissociation      Disturbance in attention      Disturbance in  
 sexual arousal      Diverticulitis      Diverticulum      Dizziness  
 Dizziness exertional      Dizziness postural      Drooling      Drug  
 abuse      Drug dependence      Drug eruption      Drug hypersensitivity      Drug  
 ineffective      Drug interaction      Drug level increased      Drug withdrawal  
 syndrome      Drug withdrawal syndrome neonatal      Dry eye      Dry mouth  
 Dry skin      Dry throat      Duodenal ulcer      Duodenal ulcer  
 haemorrhage      Duodenitis      Dysarthria      Dysentery      Dysgeusia      Dysgraphia

Dyskinesia Dysmenorrhoea Dyspepsia Dysphagia Dysphemia  
 Dysphonia Dysphoria Dysplasia Dyspnoea Dyspnoea  
 exertional Dystonia Dysuria Ear congestion Ear discomfort  
 Ear disorder Ear infection Ear pain Ecchymosis  
 Eclampsia Eczema Effusion Ejaculation delayed  
 Ejaculation disorder Ejaculation failure Elastosis  
 perforans Elderly Electrocardiogram QRS complex  
 Electrocardiogram QT prolonged Electrocardiogram ST segment  
 depression Electrocardiogram ST segment elevation Electrocardiogram  
 T wave inversion Electrocardiogram abnormal Electrocardiogram  
 change Electroencephalogram abnormal Electrolyte imbalance  
 Elevated mood Embolism Emotional disorder Emotional  
 distress Emphysema Encephalopathy Endocrine disorder  
 Endometrial cancer Endometrial hyperplasia Endometrial  
 neoplasm Endometriosis Energy increased Enteritis Enuresis  
 Enzyme abnormality Eosinophil count increased  
 Eosinophilia Epicondylitis Epididymitis Epilepsy  
 Epistaxis Erectile dysfunction Eructation Erysipelas  
 Erythema Erythema multiforme Erythromelalgia Euphoric  
 mood Eustachian tube disorder Exfoliative rash Exophthalmos  
 Exostosis Extrapyrarnidal disorder Extrasystoles Eye  
 allergy Eye discharge Eye disorder Eye haemorrhage Eye  
 infection Eye inflammation Eye irritation Eye movement disorder  
 Eye pain Eye pruritus Eye swelling Eyelid disorder  
 Eyelid function disorder Eyelid oedema Eyelid ptosis  
 Face oedema Facial pain Facial paresis Faecal incontinence  
 Faecalith Faecaloma Faeces discoloured Faeces hard  
 Fasciitis Fasting Fat intolerance Fatigue Fear  
 Feeling abnormal Feeling cold Feeling hot Feeling jittery  
 Female sexual dysfunction Fibroadenoma of breast Fibrocystic  
 breast disease Fibrosis Flank pain Flat affect Flatulence Fluid  
 overload Fluid retention Flushing Folliculitis Formication  
 Fungal infection Fungal skin infection Furuncle Gait  
 disturbance Galactorrhoea Gallbladder cancer Gallbladder  
 disorder Gamma-glutamyltransferase increased Gangrene  
 Gastric cancer Gastric dilatation Gastric disorder  
 Gastric haemorrhage Gastric pH decreased Gastric polyps  
 Gastric ulcer Gastric ulcer haemorrhage Gastritis  
 Gastritis haemorrhagic Gastroenteritis Gastrointestinal  
 disorder Gastrointestinal haemorrhage Gastrointestinal infection  
 Gastrointestinal neoplasm Gastrointestinal obstruction  
 Gastrointestinal pain Gastrointestinal stromal tumour  
 Gastrointestinal tract irritation Gastrooesophageal reflux  
 disease General symptom Generalised oedema Genital  
 candidiasis Genital discharge Gestational hypertension Gingival  
 bleeding Gingival infection Gingival pain Gingival  
 recession Gingivitis Glaucoma Glossitis Glossodynia Glucose  
 tolerance decreased Glucose tolerance impaired Glycosuria  
 Glycosylated haemoglobin increased Goitre Gout Grand mal  
 convulsion Gravitational oedema Groin pain Gynaecomastia  
 Haemangioma Haematemesis Haematochezia Haematocrit  
 decreased Haematocrit increased Haematoma Haematuria Haemoglobin  
 decreased Haemoglobin increased Haemoglobinuria Haemolysis  
 Haemolytic anaemia Haemoptysis Haemorrhage Haemorrhage  
 intracranial Haemorrhagic disorder Haemorrhoids Haemothorax

Hair disorder      Hallucination      Hallucination, auditory  
 Hallucination, visual      Hangover      Head discomfort      Head  
 titubation      Headache      Hearing impaired      Heart disease congenital  
 Heart rate irregular      Helicobacter infection      Hemianopia  
 Hemiparesis      Hemiplegia      Hepatic cirrhosis      Hepatic enzyme  
 increased      Hepatic failure      Hepatic function abnormal      Hepatic  
 necrosis      Hepatic neoplasm malignant      Hepatic steatosis      Hepatitis  
 Hepatitis cholestatic      Hepatobiliary disease      Hepatocellular  
 injury      Hepatomegaly      Hereditary disorder      Hernia  
 Herpes simplex      Herpes virus infection      Herpes zoster  
 Hiccups      High density lipoprotein decreased      Hirsutism  
 Homicidal ideation      Hordeolum      Hormone level abnormal  
 Hostility      Hot flush      Hunger      Hydrocephalus      Hyperacusis  
 Hyperaemia      Hyperaesthesia      Hyperbilirubinaemia  
 Hypercalcaemia      Hypercalciuria      Hyperchloraemia  
 Hyperchlorhydria      Hypercholesterolaemia      Hyperglycaemia  
 Hyperhidrosis      Hyperinsulinism      Hyperkalaemia  
 Hyperkeratosis      Hyperkinesia      Hyperlipidaemia  
 Hypermagnesaemia      Hypernatraemia      Hyperparathyroidism  
 Hyperphagia      Hyperphosphataemia      Hyperplasia  
 Hyperprolactinaemia      Hyperpyrexia      Hyperreflexia  
 Hypersensitivity      Hypersexuality      Hypersomnia      Hypertension  
 Hypertensive crisis      Hyperthermia      Hyperthyroidism  
 Hypertonia      Hypertonic bladder      Hypertrichosis  
 Hypertriglyceridaemia      Hypertrophy      Hyperuricaemia  
 Hyperuricosuria      Hyperventilation      Hypnagogic hallucination  
 Hypoaesthesia      Hypoaesthesia oral      Hypocalcaemia  
 Hypochloraemia      Hypocholesterolaemia      Hypochromic anaemia  
 Hypoglycaemia      Hypogonadism      Hypohidrosis  
 Hypokalaemia      Hypokinesia      Hypomagnesaemia      Hypomania  
 Hypomenorrhoea      Hyponatraemia      Hypophagia      Hypophosphataemia  
 Hypoproteinaemia      Hyporeflexia      Hypotension      Hypothermia  
 Hypothyroidism      Hypotonia      Hypoventilation      Hypovitaminosis  
 Hypovolaemia      Hypoxia      IIIrd nerve paralysis      Idiopathic  
 thrombocytopenic purpura      Ileus      Ileus paralytic      Ill-defined  
 disorder      Illusion      Immune system disorder      Impaired healing  
 Inappropriate antidiuretic hormone secretion      Incontinence  
 Increased appetite      Induration      Infarction      Infected cyst  
 Infection      Infection susceptibility increased      Infestation  
 Inflammation      Influenza      Influenza like illness      Ingrowing  
 nail      Inguinal hernia      Initial insomnia      Injection site mass  
 Injection site pain      Injection site reaction      Inner ear  
 disorder      Insomnia      Intention tremor      Intentional self-injury  
 Intermittent claudication      Interstitial lung disease  
 Intervertebral disc degeneration      Intervertebral disc disorder  
 Intervertebral disc protrusion      Intervertebral discitis  
 Intestinal functional disorder      Intestinal ischaemia  
 Intestinal obstruction      Intestinal perforation      Intracranial  
 pressure increased      Iron deficiency      Iron deficiency anaemia  
 Irritability      Irritable bowel syndrome      Ischaemia  
 Ischaemic hepatitis      Ischaemic stroke      Jaundice      Jaundice  
 cholestatic      Joint contracture      Joint crepitation      Joint effusion      Joint  
 range of motion decreased      Joint stiffness      Joint swelling  
 Judgement impaired      Keratitis      Keratoconjunctivitis sicca  
 Ketoacidosis      Ketosis      Laboratory test abnormal

Labyrinthitis Lacrimal disorder Lacrimation decreased  
 Lacrimation increased Lactose intolerance Laryngeal cancer  
 Laryngeal disorder Laryngeal neoplasm Laryngeal oedema  
 Laryngitis Laryngospasm Left ventricular failure  
 Leiomyoma Lens disorder Lenticular opacities Lenticular  
 pigmentation Leriche syndrome Lethargy Leukaemia Leukaemoid  
 reaction Leukocytoclastic vasculitis Leukocytosis Leukoderma  
 Leukopenia Leukoplakia oral Libido decreased Libido increased  
 Lichenoid keratosis Lip and/or oral cavity cancer Lip  
 blister Lip dry Lip swelling Lipoma Livedo  
 reticularis Liver disorder Liver function test abnormal Liver  
 injury Lividity Lobar pneumonia Localised infection  
 Localised oedema Logorrhoea Loss of consciousness Loss of  
 libido Low density lipoprotein increased Lower respiratory  
 tract infection Lung adenocarcinoma stage I Lung cancer metastatic  
 Lung disorder Lung infiltration Lung neoplasm malignant  
 Lymphadenitis Lymphadenopathy Lymphatic disorder  
 Lymphocyte count decreased Lymphocyte count increased  
 Lymphocytic leukaemia Lymphocytosis Lymphoedema Lymphoma  
 Lymphopenia Macular degeneration Macule Maculopathy Major  
 depression Malaise Male sexual dysfunction Malignant  
 melanoma Mammogram abnormal Mania Masked facies Mastitis  
 Mediastinal disorder Melaena Melanocytic naevus  
 Memory impairment Meningitis Menometrorrhagia Menopausal  
 symptoms Menopause Menorrhagia Menstrual disorder  
 Menstruation delayed Menstruation irregular Mental disability  
 Mental disorder Mental retardation Mental status changes  
 Metabolic alkalosis Metastasis Metastatic neoplasm  
 Methaemoglobinaemia Metrorrhagia Micturition disorder  
 Micturition urgency Middle ear disorder Middle ear  
 effusion Middle insomnia Migraine Migraine with aura  
 Migraine without aura Miosis Mitral valve incompetence  
 Mobility decreased Monarthritits Monocyte count  
 increased Monocytosis Mood swings Motion sickness Mouth ulceration  
 Movement disorder Multiple myeloma Muscle atrophy Muscle  
 contractions involuntary Muscle contracture Muscle enzyme  
 increased Muscle relaxant therapy Muscle rigidity Muscle  
 spasms Muscle spasticity Muscle tightness Muscle twitching  
 Muscular weakness Musculoskeletal chest pain Musculoskeletal  
 discomfort Musculoskeletal disorder Musculoskeletal pain  
 Musculoskeletal stiffness Mutism Myalgia Myasthenic  
 syndrome Mydriasis Myelitis Myocardial infarction Myocardial  
 ischaemia Myocarditis Myoclonus Myopathy Myopia Myositis  
 Nail discolouration Nail disorder Nail infection  
 Narcolepsy Nasal congestion Nasal disorder Nasal dryness  
 Nasal oedema Nasal polyps Nasopharyngitis Nausea  
 Neck pain Necrosis Necrosis ischaemic Neoplasm  
 Neoplasm malignant Neoplasm prostate Neoplasm recurrence  
 Neoplasm skin Nephritis Nephrolithiasis Nephrotic  
 syndrome Nerve root lesion Nervous system disorder Nervousness  
 Neuralgia Neuritis Neurodermatitis Neurogenic bladder  
 Neuroleptic malignant syndrome Neurological symptom  
 Neuroma Neuropathy peripheral Neurosis Neutropenia  
 Neutrophil count decreased Neutrophil count increased Night  
 blindness Night sweats Nightmare Nocturia Nodal arrhythmia

Nodule Normochromic normocytic anaemia Nuchal rigidity  
 Nystagmus Obesity Obsessive thoughts Obstruction  
 Obstructive airways disorder Ocular hyperaemia Oculogyric crisis  
 Oedema peripheral Oesophageal achalasia Oesophageal carcinoma  
 Oesophageal disorder Oesophageal spasm Oesophageal stenosis  
 Oesophageal ulcer Oesophagitis Oligomenorrhoea Oliguria  
 Onychomycosis Opisthotonus Oral candidiasis Oral  
 neoplasm benign Oral pain Orchitis noninfective Orgasm abnormal  
 Oropharyngeal discomfort Oropharyngeal pain  
 Oropharyngeal spasm Orthostatic hypotension  
 Osteoarthritis Osteoarthropathy Osteodystrophy  
 Osteomyelitis Osteonecrosis Osteopenia Osteoporosis  
 Osteoporotic fracture Otitis externa Otitis media  
 Otitis media chronic Ovarian cancer Ovarian cyst Pain  
 in extremity Pain in jaw Pallor Palpitations  
 Pancreatitis Pancreatitis acute Pancytopenia Panic  
 attack Panic disorder Panic disorder with agoraphobia Panic  
 reaction Papilloma Paraesthesia Paraesthesia oral Paralysis  
 Paranoia Parasomnia Paresis Parkinsonian gait  
 Parkinsonism Paronychia Parosmia Pathological fracture  
 Pathological gambling Pelvic pain Penis disorder Peptic  
 ulcer Pericardial effusion Pericarditis constrictive Perineal  
 pain Periodontitis Periorbital oedema Peripheral coldness  
 adhesions Peripheral ischaemia Peripheral vascular disorder Peritoneal  
 Personality disorder Petechiae Pharyngeal disorder  
 Pharyngeal erythema Pharyngeal oedema Pharyngitis Phlebitis  
 Phlebitis superficial Phobia Phonological disorder  
 Photophobia Photopsia Photosensitivity allergic reaction  
 Photosensitivity reaction Pigmentation disorder  
 Piloerection Pituitary tumour benign Plantar fasciitis  
 Plasmacytoma Platelet count decreased Pleural disorder  
 Pleural effusion Pleural fibrosis Pleurisy Pneumonia  
 Pneumonia aspiration Pneumothorax Poisoning  
 Poliomyelitis Pollakiuria Polyarteritis nodosa  
 Polycythaemia Polydipsia Polymyalgia rheumatica Polyp  
 Polyuria Poor peripheral circulation Post procedural  
 infection Postmenopausal haemorrhage Postural orthostatic  
 tachycardia syndrome Posture abnormal Pre-eclampsia Precocious  
 puberty Premature ejaculation Premenstrual syndrome Presyncope  
 Priapism Proctalgia Productive cough Prolactinoma  
 Prostate cancer Prostatic adenoma Prostatic disorder  
 Prostatitis Prostatomegaly Protein total decreased  
 Protein urine present Proteinuria Protrusion tongue Prurigo  
 Pruritus Pruritus generalised Pruritus genital  
 Pseudolymphoma Psoriasis Psychiatric symptom Psychomotor  
 retardation Psychosomatic disease Psychotic disorder Puberty  
 Pulmonary congestion Pulmonary embolism Pulmonary  
 fibrosis Pulmonary function test decreased Pulmonary hypertension  
 Pulmonary oedema Pupils unequal Purpura Pyelonephritis  
 Pyoderma Pyuria Rales Rash Rash erythematous Rash  
 generalised Rash maculo-papular Rash papular Rash pustular  
 Rash vesicular Raynaud's phenomenon Rectal cancer  
 Rectal haemorrhage Rectal prolapse Rectal tenesmus Red  
 blood cell count decreased Red blood cell count increased Red  
 blood cell sedimentation rate increased Reflux oesophagitis

Regressive behaviour    Regurgitation    Renal artery stenosis  
 Renal colic    Renal cyst    Renal failure acute    Renal impairment  
 Renal neoplasm    Renal pain    Respiratory alkalosis    Respiratory  
 arrest    Respiratory depression    Respiratory disorder    Respiratory  
 distress    Respiratory failure    Respiratory tract congestion  
 Respiratory tract infection viral    Restless legs syndrome  
 Retching    Retinal artery occlusion    Retinal detachment  
 Retinal disorder    Retinal vascular disorder    Retinitis  
 pigmentosa    Retrograde ejaculation    Retroperitoneal fibrosis  
 Rhabdomyolysis    Rheumatoid arthritis    Rhinitis    Rhinitis  
 allergic    Rhinitis seasonal    Rhinorrhoea    Rhonchi    Rosacea  
 Rotator cuff syndrome    Sacroiliitis    Saliva altered  
 Salivary duct obstruction    Salivary gland disorder  
 Salivary gland enlargement    Salivary hypersecretion  
 Salpingitis    Sarcoidosis    Sarcoma    Scab    Schizoaffective  
 disorder    Schizophrenia    Schizophreniform disorder    Sciatica  
 Scleral haemorrhage    Scleritis    Scotoma    Seasonal allergy  
 Seborrhoeic dermatitis    Seborrhoeic keratosis    Sedation  
 Sensation of foreign body    Sensation of heaviness    Sensory  
 disturbance    Sensory loss    Sepsis    Septic shock    Severe  
 acute respiratory syndrome    Sexual dysfunction    Shock  
 Sialoadenitis    Sicca syndrome    Sick sinus syndrome    Sinus  
 arrhythmia    Sinus bradycardia    Sinus congestion    Sinus disorder    Sinus  
 headache    Sinus tachycardia    Sinusitis    Skin burning sensation    Skin  
 cancer    Skin discolouration    Skin disorder    Skin exfoliation  
 Skin hyperpigmentation    Skin hypertrophy    Skin infection    Skin  
 irritation    Skin lesion    Skin mass    Skin odour abnormal    Skin  
 papilloma    Skin ulcer    Sleep apnoea syndrome    Sleep attacks    Sleep  
 disorder    Sleep paralysis    Sleep talking    Sluggishness    Small  
 intestinal obstruction    Sneezing    Snoring    Social avoidant  
 behaviour    Somnambulism    Somnolence    Speech disorder    Sphincter  
 of Oddi dysfunction    Spinal osteoarthritis    Spine malformation  
 Splenomegaly    Spondylitis    Squamous cell carcinoma  
 Status epilepticus    Stevens-Johnson syndrome    Sticky skin  
 Stomach dilation procedure    Stomatitis    Strabismus    Stress  
 Stridor    Stupor    Subarachnoid haemorrhage  
 Subcutaneous abscess    Subcutaneous nodule    Subdural  
 haematoma    Subileus    Sudden death    Suicidal ideation    Suicide  
 attempt    Superior sagittal sinus thrombosis    Supraventricular  
 extrasystoles    Supraventricular tachycardia    Surgery  
 Suspiciousness    Swelling    Swelling face    Swollen tongue  
 Syncope    Synostosis    Synovial cyst    Synovitis    Systemic  
 lupus erythematosus    Tachycardia    Tachypnoea    Tardive dyskinesia  
 Telangiectasia    Tenderness    Tendinous contracture    Tendon  
 disorder    Tendonitis    Tenosynovitis    Tension    Tension headache  
 Terminal insomnia    Testicular disorder    Testicular pain  
 Testicular swelling    Tetany    Therapeutic response  
 decreased    Therapeutic response increased    Thinking abnormal  
 Thirst    Thought blocking    Throat irritation    Throat tightness  
 Thrombocytopenia    Thrombocytopenic purpura    Thrombocytosis  
 Thrombophlebitis    Thrombosis    Thrombotic thrombocytopenic  
 purpura    Thyroid adenoma    Thyroid cancer    Thyroid neoplasm  
 Thyroiditis    Tic    Tinea pedis    Tinnitus    Tongue discolouration  
 Tongue disorder    Tongue dry    Tongue oedema    Tongue paralysis  
 Tongue spasm    Tongue ulceration    Tonsillar hypertrophy

Tonsillitis Tooth abscess Tooth disorder Tooth impacted  
 Tooth infection Toothache Torsade de pointes Torticollis  
 Toxic epidermal necrolysis Tracheitis Tracheobronchitis  
 Transaminases increased Transient ischaemic attack  
 Tremor Trismus Tuberculin test positive  
 Tubulointerstitial nephritis Ulcer Ulcer haemorrhage Umbilical  
 hernia Unevaluable event Unintended pregnancy Unresponsive to  
 stimuli Upper respiratory tract infection Upper-airway cough  
 syndrome Urethral disorder Urethral pain Urethritis Urinary  
 hesitation Urinary incontinence Urinary retention Urinary tract  
 disorder Urinary tract infection Urinary tract obstruction  
 Urine abnormality Urine analysis abnormal Urine output  
 increased Urogenital disorder Urosepsis Urticaria Uterine  
 disorder Uterine haemorrhage Uterine inflammation Uterine  
 leiomyoma Uterine neoplasm Uterovaginal prolapse VIIth nerve  
 paralysis Vaginal cyst Vaginal discharge Vaginal haemorrhage  
 Vaginal infection Vaginal inflammation Varicose vein  
 Vascular headache Vascular insufficiency Vascular purpura  
 Vasculitis Vasoconstriction Vasodilation procedure Vasospasm  
 Vein disorder Venous thrombosis Ventricular arrhythmia  
 Ventricular extrasystoles Ventricular failure Ventricular  
 fibrillation Ventricular hypertrophy Ventricular  
 tachycardia Vertigo Vestibular ataxia Vestibular disorder Viral  
 diarrhoea Viral infection Vision blurred Visual acuity reduced  
 Visual impairment Vitamin B12 deficiency Vitreous detachment  
 Vitreous floaters Vocal cord paralysis Vomiting Vulval  
 disorder Vulvovaginal candidiasis Vulvovaginal dryness  
 Vulvovaginal mycotic infection Vulvovaginal pruritus  
 Vulvovaginitis Water intoxication Waxy flexibility  
 Weight decreased Weight fluctuation Weight increased  
 Wheezing White blood cell count decreased White blood cell  
 count increased White blood cells urine positive Withdrawal bleed  
 Withdrawal syndrome Wound haemorrhage Wound infection  
 Xerophthalmia Xerosis Yawning

\*\*\*\*\*  
\*\*\*\*\*

Interleukin-1 receptor-associated kinase 4 - Group: Enzyme

Treated with:

1-(3-hydroxypropyl)-2-[(3-nitrobenzoyl)amino]-1h-benzimidazol-5-yl  
 pivalate: experimental small molecule (0 associated side  
 effects)

known side effects mediated through drugs targeting this protein:

\*\*\*\*\*  
\*\*\*\*\*

Vitamin D3 receptor - Group: Receptor

Treated with:

calcitriol: approved, nutraceutical small molecule (0 associated  
 side effects) Used to treat vitamin D deficiency or  
 insufficiency, refractory rickets (vitamin D resistant rickets),  
 familial hypophosphatemia and hypoparathyroidism, and in the  
 management of hypocalcemia and renal osteodystrophy in patients with  
 chronic renal failure undergoing dialysis. Also used in conjunction



with calcium in the management and prevention of primary or corticosteroid-induced osteoporosis.

calcidiol: approved, nutraceutical small molecule (0 associated side effects) Used to treat vitamin D deficiency or insufficiency, refractory rickets (vitamin D resistant rickets), familial hypophosphatemia and hypoparathyroidism, and in the management of hypocalcemia and renal osteodystrophy in patients with chronic renal failure undergoing dialysis. Also used in conjunction with calcium in the management and prevention of primary or corticosteroid-induced osteoporosis.

ergocalciferol: approved, nutraceutical small molecule (0 associated side effects) For use in the management of hypocalcemia and its clinical manifestations in patients with hypoparathyroidism, as well as for the treatment of familial hypophosphatemia (vitamin D resistant rickets). This drug has also been used in the treatment of nutritional rickets or osteomalacia, vitamin D dependent rickets, rickets or osteomalacia secondary to long-term high dose anticonvulsant therapy, early renal osteodystrophy, osteoporosis (in conjunction with calcium), and hypophosphatemia associated with Fanconi syndrome (with treatment of acidosis).

cholecalciferol: approved, nutraceutical small molecule (0 associated side effects) For the treatment of vitamin D deficiency or insufficiency, refractory rickets (vitamin D resistant rickets), familial hypophosphatemia and hypoparathyroidism, and in the management of hypocalcemia and renal osteodystrophy in patients with chronic renal failure undergoing dialysis. Also used in conjunction with calcium in the management and prevention of primary or corticosteroid-induced osteoporosis.

paricalcitol: approved small molecule (166 associated side effects) For treatment of secondary hyperparathyroidism associated with chronic kidney disease (CKD) Stage 3 and 4

dihydroxycholesterol: approved small molecule (0 associated side effects) Used for the prevention and treatment of rickets or osteomalacia, and to manage hypocalcemia associated with hypoparathyroidism or pseudohypoparathyroidism. Also used for the treatment of vitamin D dependent rickets, rickets or osteomalacia secondary to long-term high dose anticonvulsant therapy, early renal osteodystrophy, osteoporosis (in conjunction with calcium), and hypophosphatemia associated with Fanconi syndrome (with treatment of acidosis).

alfacalcidol: approved, nutraceutical small molecule (0 associated side effects) Alfacalcidol is an active metabolite of Vitamin D, which performs important functions in regulation of the calcium balance and the bone metabolism.

calcipotriol: approved, nutraceutical small molecule (15 associated side effects) For the treatment of moderate plaque psoriasis in adults.

1 $\alpha$ ,25-dihydroxy-20-epi-22-oxa-24,26,27-trihomovitamin d3:

experimental small molecule (0 associated side effects)  
seocalcitol: experimental small molecule (0 associated side effects)

inecalcitol: experimental small molecule (0 associated side effects) Investigated for use/treatment in prostate cancer, psoriasis and hyperparathyroidism.

(1r,3r)-5-[(2e)-3-[(1s,3r)-2,2,3-trimethyl-3-[6,6,6-trifluoro-5-hydroxy-5-(trifluoromethyl)hex-3-yn-1-yl]cyclopentyl}prop-2-en-1-ylidene]cyclohexane-1,3-diol: experimental small molecule  
(0 associated side effects)

5-{2-[1-(1-methyl-propyl)-7a-methyl-octahydro-inden-4-ylidene]-ethylidene}-2-methylene-cyclohexane-1,3-diol: experimental small molecule  
(0 associated side effects)

1,3-cyclohexanediol, 4-methylene-5-[(2e)-[(1s,3as,7as)-octahydro-1-(5-hydroxy-5-methyl-1,3-hexadiynyl)-7a-methyl-4h-inden-4-ylidene]ethylidene]-, (1r,3s,5z): experimental small molecule  
(0 associated side effects)

176 known side effects mediated through drugs targeting this protein:

Abdominal discomfort Abdominal pain Acne Adverse reaction  
Ageusia Agitation Alopecia Anaemia Angioedema  
Angiopathy Aortic dissection Arrhythmia Arthralgia Arthropathy  
Aspartate aminotransferase increased Asthenia Asthma  
Atrial flutter Atrophy Back pain Bleeding time  
prolonged Blister Blood urea increased Body temperature  
increased Bone pain Breast cancer Breast disorder Breast pain  
Burning sensation Calcinosis Cardiac arrest Cardiac disorder  
Cardiac flutter Cerebral ischaemia Cerebrovascular  
accident Chest discomfort Chest pain Chills Colitis  
Condition aggravated Confusional state Conjunctivitis  
Connective tissue disorder Constipation Cough Death  
Decreased appetite Delirium Depersonalisation Depressed  
level of consciousness Dermatitis Dermatitis bullous Diarrhoea  
Discomfort Disturbance in sexual arousal Dizziness Dry  
mouth Dry skin Dysgeusia Dyspepsia Dysphagia Dyspnoea Ear  
discomfort Ear disorder Endocrine disorder Epistaxis  
Erectile dysfunction Eructation Erythema Extravasation  
Eye disorder Eye inflammation Fatigue Feeling abnormal  
Folliculitis Gait disturbance Gastritis Gastrointestinal  
disorder Gastrointestinal haemorrhage Gastrointestinal pain  
Glaucoma Haemoglobin Haemorrhage Headache Heart rate  
irregular Hirsutism Hormone level abnormal Hyperaemia  
Hypercalcaemia Hypercholesterolaemia Hyperhidrosis  
Hyperkalaemia Hypersensitivity Hypertension  
Hyperthermia Hypoaesthesia Hypocalcaemia  
Hypoparathyroidism Hypotension Ill-defined disorder  
Infection Infestation Influenza Injection site pain  
Insomnia Intestinal ischaemia Ischaemia Joint stiffness  
Laboratory test abnormal Laryngeal oedema Leukopenia  
Libido decreased Loss of consciousness Lymphadenopathy  
Malaise Mediastinal disorder Mental disorder Mesenteric  
vascular insufficiency Muscle twitching Musculoskeletal discomfort  
Musculoskeletal stiffness Myalgia Myoclonus  
Nasopharyngitis Nausea Neoplasm malignant Nervous  
system disorder Nervousness Night sweats Ocular hyperaemia  
Oedema Oedema mouth Oedema peripheral Orthopnoea  
Osteoarthritis Pain Palpitations Pancreatitis  
Paraesthesia Pharyngitis Photophobia Pneumonia Poisoning  
Prurigo Pruritus Psoriasis Psychotic disorder  
Pulmonary oedema Rash Rash pustular Rectal haemorrhage

Respiratory tract infection Rhinorrhoea Sepsis Shock Skin  
atrophy Skin burning sensation Skin disorder Skin exfoliation  
Skin hyperpigmentation Skin irritation Somnolence Stupor  
Swelling Syncope Tension Thirst Unresponsive to  
stimuli Upper respiratory tract infection Urticaria Vaginal  
infection Vaginal inflammation Vasodilation procedure Vomiting  
Weight decreased Wheezing

\*\*\*\*\*  
\*\*\*\*\*

Growth factor receptor-bound protein 2 - Group: Other

Treated with:

pegademase bovine: approved biotech (0 associated side  
effects) For treatment of adenosine deaminase deficiency  
4-[(10s,14s,18s)-18-(2-amino-2-oxoethyl)-14-(1-naphthylmethyl)-  
8,17,20-trioxo-7,16,19-triazaspiro[5.14]icos-11-en-10-  
yl]benzylphosphonic acid: experimental small molecule (0  
associated side effects)

known side effects mediated through drugs targeting this protein:

\*\*\*\*\*  
\*\*\*\*\*

Thyrotropin receptor - Group: Receptor

Treated with:

thyrotropin alfa: approved biotech (0 associated side effects)  
For detection of residueal or recurrent thyroid cancer

known side effects mediated through drugs targeting this protein:

\*\*\*\*\*  
\*\*\*\*\*

Mitochondrial ornithine transporter 1 - Group: Transporter

Treated with:

l-ornithine: approved, nutraceutical small molecule (0  
associated side effects) Used for nutritional supplementation,  
also for treating dietary shortage or imbalance. It has been claimed  
that ornithine improves athletic performance, has anabolic effects,  
has wound-healing effects, and is immuno-enhancing.

known side effects mediated through drugs targeting this protein:

\*\*\*\*\*  
\*\*\*\*\*

Potassium voltage-gated channel subfamily C member 4 - Group:

Channel

Treated with:

phosphoserine: experimental small molecule (0 associated  
side effects)

known side effects mediated through drugs targeting this protein:

\*\*\*\*\*  
\*\*\*\*\*

Ephrin type-A receptor 7 - Group: Enzyme

Treated with:

5-[(2-methyl-5-[[3-(trifluoromethyl)phenyl]carbamoyl]phenyl)amino]pyridine-3-carboxamide: experimental small molecule (0 associated side effects)

known side effects mediated through drugs targeting this protein:

\*\*\*\*\*  
\*\*\*\*\*

Transient receptor potential cation channel subfamily A member 1 - Group: Channel

Treated with:

menthol: approved small molecule (0 associated side effects)

Used to treat occasional minor irritation, pain, sore mouth, and sore throat as well as cough associated with a cold or inhaled irritants.

known side effects mediated through drugs targeting this protein:

\*\*\*\*\*  
\*\*\*\*\*

Muscarinic acetylcholine receptor M2 - Group: Receptor

Treated with:

succinylcholine: approved small molecule (27 associated side effects) Used in surgical procedures where a rapid onset and brief duration of muscle relaxation is needed (includes intubation, endoscopies, and ECT)

ziprasidone: approved small molecule (251 associated side effects) For the treatment of schizophrenia and related psychotic disorders.

disopyramide: approved small molecule (85 associated side effects) For the treatment of documented ventricular arrhythmias, such as sustained ventricular tachycardia, ventricular pre-excitation and cardiac dysrhythmias. It is a Class Ia antiarrhythmic drug.

amitriptyline: approved small molecule (109 associated side effects) For the treatment of depression, chronic pain, irritable bowel syndrome, sleep disorders, diabetic neuropathy, agitation and insomnia, and migraine prophylaxis.

ipratropium bromide: approved small molecule (116 associated side effects) For maintenance treatment of bronchospasm associated with chronic obstructive pulmonary disease, including chronic bronchitis and emphysema.

olanzapine: approved small molecule (393 associated side effects) For the acute and maintenance treatment of schizophrenia and related psychotic disorders, as well as acute treatment of manic or mixed episodes of bipolar 1 disorder. Intramuscular olanzapine is indicated for the rapid control of agitated patients.

metixene: approved small molecule (0 associated side effects)

Used for the symptomatic treatment of parkinsonism.

clozapine: approved small molecule (228 associated side effects) For use in patients with treatment-resistant schizophrenia.

trihexyphenidyl: approved small molecule (43 associated side effects) Indicated for the treatment of parkinson's disease and extrapyramidal reactions caused by drugs.

oxyphencyclimine: approved small molecule (0 associated side effects) For the treatment of peptic ulcer disease and the relief of smooth muscle spasms in gastrointestinal disorders.

procyclidine: approved small molecule (0 associated side effects) For the treatment of all forms of Parkinson's Disease, as well as control of extrapyramidal reactions induced by antipsychotic agents.

ethopropazine: approved small molecule (0 associated side effects) For use in the treatment of Parkinson's disease and also used to control severe reactions to certain medicines such as reserpine.

carbachol: approved small molecule (12 associated side effects) Primarily used in the treatment of glaucoma, but is also used during ophthalmic surgery.

promazine: approved small molecule (0 associated side effects) Used as an adjunct for short term treatment of moderate and severe psychomotor agitation. Also used to treat agitation or restlessness in the elderly.

hyoscyamine: approved small molecule (0 associated side effects) For treatment of bladder spasms, peptic ulcer disease, diverticulitis, colic, irritable bowel syndrome, cystitis, and pancreatitis. Also used to treat certain heart conditions, to control the symptoms of Parkinson's disease and rhinitis.

cyproheptadine: approved small molecule (63 associated side effects) For treatment of perennial and seasonal allergic rhinitis, vasomotor rhinitis, allergic conjunctivitis due to inhalant allergens and foods, mild uncomplicated allergic skin manifestations of urticaria and angioedema, amelioration of allergic reactions to blood or plasma, cold urticaria, dermatographism, and as therapy for anaphylactic reactions adjunctive to epinephrine.

imipramine: approved small molecule (100 associated side effects) For the relief of symptoms of depression and as temporary adjunctive therapy in reducing enuresis in children aged 6 years and older. May also be used to manage panic disorders, with or without agoraphobia, as a second line agent in ADHD, management of eating disorders, for short-term management of acute depressive episodes in bipolar disorder and schizophrenia, and for symptomatic treatment of postherpetic neuralgia.

methylscopolamine: approved small molecule (29 associated side effects) Used as adjunctive therapy for the treatment of peptic ulcer. Also used to treat nausea and vomiting due to motion sickness.

gallamine triethiodide: approved small molecule (0 associated side effects) For use as adjuncts to anesthesia to induce skeletal muscle relaxation and to facilitate the management of patients undergoing mechanical ventilation

darifenacin: approved small molecule (69 associated side effects) For the treatment of overactive bladder with symptoms of urge urinary incontinence, urgency and frequency.

tridihexethyl: approved small molecule (0 associated side effects) Used as an adjunct in the treatment of peptic ulcer disease and in Acquired nystagmus

triflupromazine: approved small molecule (0 associated side effects) Used mainly in the management of psychoses. Also used to control nausea and vomiting.

anisotropine methylbromide: approved small molecule (0 associated side effects) For use in conjunction with antacids or histamine H<sub>2</sub>-receptor antagonists in the treatment of peptic ulcer, to reduce further gastric acid secretion and delay gastric emptying.

nortriptyline: approved small molecule (91 associated side effects) For the treatment of depression, chronic pain, irritable bowel syndrome, sleep disorders, diabetic neuropathy, agitation and insomnia, and migraine prophylaxis.

atropine: approved small molecule (161 associated side effects) For the treatment of poisoning by susceptible organophosphorous nerve agents having cholinesterase activity as well as organophosphorous or carbamate insecticides.

nicardipine: approved small molecule (107 associated side effects) Used for the management of patients with chronic stable angina and for the treatment of hypertension.

paroxetine: approved small molecule (505 associated side effects) Labeled indications include: major depressive disorder (MDD), panic disorder with or without agoraphobia, obsessive-compulsive disorder (OCD), social anxiety disorder (social phobia), generalized anxiety disorder (GAD), post-traumatic stress disorder (PTSD), and premenstrual dysphoric disorder (PMDD). Unlabeled indications include: eating disorders, impulse control disorders, vasomotor symptoms of menopause, obsessive-compulsive disorder (OCD) in children, and mild dementia-associated agitation in nonpsychotic individuals.

homatropine methylbromide: approved small molecule (0 associated side effects) Used in conjunction with antacids or histamine H<sub>2</sub>-receptor antagonists in the treatment of peptic ulcers, gastric ulcers and duodenal ulcers, to reduce further gastric acid secretion and delay gastric emptying.

rocuronium: approved small molecule (25 associated side effects) For inpatients and outpatients as an adjunct to general anesthesia to facilitate both rapid sequence and routine tracheal intubation, and to provide skeletal muscle relaxation during surgery or mechanical ventilation.

benzquinamide: approved small molecule (0 associated side effects) Used to prevent and treat nausea and vomiting associated with anesthesia and surgery, administered intramuscularly or intravenously.

propiomazine: approved small molecule (0 associated side effects) Propiomazine is largely used for its antihistaminic sleep inducing effects in treating insomnia.

cryptenamine: approved small molecule (0 associated side effects) For the treatment of hypertension.

dicyclomine: approved small molecule (85 associated side effects)

tropicamide: approved small molecule (14 associated side effects) Indicated to induce mydriasis (dilation of the pupil) and cycloplegia (paralysis of the ciliary muscle of the eye) in diagnostic procedures, such as measurement of refractive errors and examination of the fundus of the eye.

brompheniramine: approved small molecule (27 associated side effects) For the treatment of the symptoms of the common cold and allergic rhinitis, such as runny nose, itchy eyes, watery eyes, and sneezing.

cocaine: illicit, approved small molecule (13 associated side effects) For the introduction of local (topical) anesthesia of accessible mucous membranes of the oral, laryngeal and nasal cavities.

maprotiline: approved small molecule (0 associated side effects) For treatment of depression, including the depressed phase of bipolar depression, psychotic depression, and involuntional melancholia, and may also be helpful in treating certain patients suffering severe depressive neurosis.

bethanechol: approved small molecule (25 associated side effects) For the treatment of acute postoperative and postpartum nonobstructive (functional) urinary retention and for neurogenic atony of the urinary bladder with retention.

tolterodine: approved small molecule (51 associated side effects) For the treatment of overactive bladder (with symptoms of urinary frequency, urgency, or urge incontinence).

oxybutynin: approved small molecule (163 associated side effects) For the treatment of overactive bladder.

promethazine: approved small molecule (80 associated side effects) For the treatment of allergic disorders, and nausea/vomiting.

pilocarpine: approved small molecule (207 associated side effects) For the treatment of radiation-induced dry mouth (xerostomia) and symptoms of dry mouth in patients with Sj&ouml;grens syndrome.

doxacurium chloride: approved small molecule (0 associated side effects) Used to provide skeletal muscle relaxation as an adjunct to general anesthesia, for endotracheal intubation or to facilitate mechanical ventilation.

doxepin: approved small molecule (210 associated side effects) Labeled indications: depression and insomnia. Unlabeled indications: chronic and neuropathic pain, anxiety, idiopathic urticaria.

flavoxate: approved small molecule (18 associated side effects) For symptomatic relief of dysuria, urgency, nocturia, suprapubic pain, frequency and incontinence as may occur in cystitis, prostatitis, urethritis, urethrocystitis/urethrotrigonitis.

desipramine: approved small molecule (120 associated side effects) For relief of symptoms in various depressive syndromes, especially endogenous depression. It has also been used to manage chronic peripheral neuropathic pain, as a second line agent for the management of anxiety disorders (e.g. panic disorder, generalized anxiety disorder), and as a second or third line agent in the ADHD management.

quetiapine: approved small molecule (359 associated side effects) For the treatment of schizophrenia and related psychotic disorders.

mivacurium: approved small molecule (18 associated side effects) For inpatients and outpatients, as an adjunct to general

anesthesia, to facilitate tracheal intubation and to provide skeletal muscle relaxation during surgery or mechanical ventilation.  
diphenidol: approved small molecule (0 associated side effects)

For use in the prevention and symptomatic treatment of peripheral (labyrinthine) vertigo and associated nausea and vomiting that occur in such conditions as Meniere's disease and surgery of the middle and inner ear. Also for the control of nausea and vomiting associated with postoperative states, malignant neoplasms, labyrinthine disturbances, antineoplastic agent therapy, radiation sickness, and infectious diseases.

aripiprazole: approved small molecule (630 associated side effects) For the treatment of schizophrenia and related psychotic disorders.

chlorprothixene: approved small molecule (0 associated side effects) For treatment of psychotic disorders (e.g. schizophrenia) and of acute mania occurring as part of bipolar disorders.

metocurine: approved small molecule (0 associated side effects)  
Metocurine is a muscle relaxant.

pancuronium: approved small molecule (18 associated side effects) Used as a muscle relaxant during anesthesia and surgical procedures.

pipecuronium: approved small molecule (0 associated side effects) Used as a muscle relaxant during anesthesia and surgical procedures.

methotrimeprazine: approved small molecule (0 associated side effects) For the treatment of psychosis, particular those of schizophrenia, and manic phases of bipolar disorder.

tiotropium: approved small molecule (60 associated side effects)  
Used in the management of chronic obstructive pulmonary disease (COPD).

solifenacin: approved small molecule (56 associated side effects) For the treatment of overactive bladder with symptoms of urge urinary incontinence, urgency, and urinary frequency.

fesoterodine: approved small molecule (50 associated side effects) For the treatment of overactive bladder (with symptoms of urinary frequency, urgency, or urge incontinence).

dimethindene: approved small molecule (0 associated side effects) Indicated as symptomatic treatment of allergic reactions: urticaria, allergies of the upper respiratory tract such as hay fever and perennial rhinitis, food and drug allergies; pruritus of various origins, except pruritus due to cholestasis; insect bites. Dimethindene is also indicated for pruritus in eruptive skin diseases such as chicken-pox. Dimethindene can also be used as an adjuvant in eczema and other pruriginous dermatoses of allergic origin.

1079 known side effects mediated through drugs targeting this protein:

Abasia Abdominal discomfort Abdominal distension Abdominal pain  
Abdominal pain lower Abdominal pain upper Abdominal tenderness  
Abnormal dreams Abnormal faeces Abscess  
Accommodation disorder Acidosis Acne Acute coronary syndrome  
Acute psychosis Adenocarcinoma Adjustment disorder  
Affect lability Ageusia Aggression Agitation Agoraphobia  
Agranulocytosis Akathisia Akinesia Alanine



aminotransferase increased Albuminuria Alcohol abuse Alcohol  
 intolerance Alkalosis Alopecia Altered state of consciousness  
 Alveolitis allergic Amblyopia Amenorrhoea Amnesia  
 Anaemia Anaemia macrocytic Anaphylactic shock  
 Anaphylactoid reaction Anger Angina pectoris Angioedema  
 Angiopathy Angle closure glaucoma Anhidrosis Anisocytosis  
 Anorectal disorder Anorgasmia Antinuclear antibody  
 positive Antisocial behaviour Antisocial personality disorder  
 Anxiety Aortic dissection Apathy Aphasia Aphthous  
 stomatitis Aplasia Aplastic anaemia Apnoea Appendicitis  
 Application site reaction Arrhythmia Arrhythmia  
 supraventricular Arteriosclerosis Arteritis Arthralgia Arthritis  
 Arthropathy Asocial behaviour Aspartate aminotransferase  
 increased Asphyxia Aspiration Assisted fertilisation Asthenia  
 Asthma Ataxia Atelectasis Athetosis Atrial  
 fibrillation Atrial flutter Atrioventricular block first  
 degree Atrioventricular dissociation Atrophy Azospermia  
 Azotaemia Back pain Balance disorder Basophilia Benign  
 prostatic hyperplasia Bladder dilatation Bladder neck  
 obstruction Bladder pain Bleeding time prolonged Blepharitis  
 Blepharospasm Blindness Blister Blood alkaline  
 phosphatase increased Blood bilirubin increased Blood cholesterol  
 increased Blood creatine phosphokinase increased Blood creatinine  
 increased Blood disorder Blood glucose decreased Blood  
 glucose increased Blood insulin increased Blood lactate  
 dehydrogenase increased Blood potassium decreased Blood  
 potassium increased Blood pressure abnormal Blood pressure  
 diastolic decreased Blood pressure fluctuation Blood pressure  
 increased Blood pressure systolic decreased Blood prolactin  
 increased Blood triglycerides increased Blood triglycerides  
 normal Blood urea increased Blood uric acid increased Blood  
 urine Blood urine present Blunted affect Body temperature  
 decreased Body temperature increased Bone disorder Bone pain  
 Bradycardia Bradykinesia Bradyphrenia Brain oedema  
 Breast atrophy Breast cancer Breast cyst Breast disorder  
 Breast enlargement Breast feeding Breast neoplasm  
 Breast pain Breath odour Bronchitis Bronchopneumopathy  
 Bronchospasm paradoxical Bruxism Buccoglossal syndrome  
 Bulimia nervosa Bundle branch block Burning sensation  
 Bursitis Cachexia Calculus urinary Candidiasis  
 Carbohydrate tolerance decreased Cardiac arrest Cardiac  
 disorder Cardiac failure Cardiac failure congestive Cardiac  
 fibrillation Cardiac flutter Cardiac murmur Cardiac output  
 decreased Cardio-respiratory arrest Cardiomegaly  
 Cardiomyopathy Cardiopulmonary failure Cardiovascular  
 disorder Carpal tunnel syndrome Cataplexy Cataract Catatonia  
 Cells in urine Cellulitis Cerebellar syndrome Cerebral  
 haemorrhage Cerebral infarction Cerebral ischaemia  
 Cerebrovascular accident Cerebrovascular disorder  
 Cervicitis Cervix disorder Chapped lips Cheilitis Chest  
 discomfort Chest pain Chills Cholecystitis Cholelithiasis  
 Cholestasis Cholinergic syndrome Chondropathy Chorea  
 Choreoathetosis Chronic lymphocytic leukaemia Chronic  
 obstructive pulmonary disease Ciliary muscle spasm Clonus  
 Coccydynia Cognitive disorder Cogwheel rigidity Cold sweat

Colitis Colonic obstruction Coma Completed suicide  
 Condition aggravated Conduction disorder Confusional state  
 Conjunctival disorder Conjunctival hyperaemia  
 Conjunctival oedema Conjunctivitis Connective tissue  
 disorder Constipation Conversion disorder Convulsion  
 Coordination abnormal Corneal degeneration Corneal lesion  
 Corneal oedema Corneal opacity Costochondritis Cough  
 Crying Cyanosis Cycloplegia Cystitis Cystitis  
 noninfective Deafness Death Decreased appetite Decubitus  
 ulcer Deep vein thrombosis Deficiency anaemia Dehydration  
 Delirium Delusion Dementia Dental caries Dependence  
 Depersonalisation Depressed level of consciousness Depression  
 Depressive symptom Derealisation Dermal cyst Dermatitis  
 Dermatitis atopic Dermatitis bullous Dermatitis contact  
 Dermatitis exfoliative Diabetes mellitus Diabetic coma  
 Diabetic hyperglycaemic coma Diabetic hyperosmolar coma  
 Diabetic ketoacidosis Diarrhoea Diarrhoea haemorrhagic  
 Diplopia Discomfort Disease progression Disorientation  
 Dissociation Disturbance in attention Disturbance in  
 sexual arousal Diverticulitis Dizziness Dizziness exertional  
 Dizziness postural Drooling Drug abuse Drug dependence  
 Drug eruption Drug hypersensitivity Drug ineffective Drug  
 interaction Drug withdrawal syndrome Dry eye Dry mouth Dry  
 skin Dry throat Duodenal ulcer Duodenitis Dysarthria Dysgeusia  
 Dyskinesia Dysmenorrhoea Dyspepsia Dysphagia Dysphemia  
 Dysphonia Dysphoria Dyspnoea Dystonia Dysuria Ear  
 disorder Ear infection Ear pain Ecchymosis Eclampsia  
 Eczema Effusion Ejaculation delayed Ejaculation  
 disorder Elastosis perforans Elderly Electrocardiogram QRS  
 complex Electrocardiogram QT prolonged Electrocardiogram ST  
 segment Electrocardiogram ST segment depression Electrocardiogram  
 ST segment elevation Electrocardiogram T wave inversion  
 Electrocardiogram abnormal Electrocardiogram change  
 Electroencephalogram abnormal Elevated mood Embolism  
 Emphysema Encephalopathy Endocrine disorder Endometrial  
 disorder Energy increased Enteritis Enuresis Eosinophilia  
 Epididymitis Epilepsy Epistaxis Erectile dysfunction  
 Eructation Erythema Erythema multiforme Erythema nodosum  
 Euphoric mood Exfoliative rash Exophthalmos Exostosis  
 Extensor plantar response Extrapyrarnidal disorder  
 Extrasystoles Extravasation Eye discharge Eye  
 disorder Eye haemorrhage Eye infection Eye inflammation Eye  
 irritation Eye pain Eyelid disorder Eyelid function disorder  
 Eyelid oedema Eyelid ptosis Face oedema Facial pain  
 Facial paresis Faecal incontinence Faecalith Faecaloma  
 Faeces hard Fasting Fatigue Fear Feeling abnormal  
 Feeling cold Feeling hot Feeling jittery Female sexual  
 dysfunction Fibrocystic breast disease Fibrosis Flank pain Flat  
 affect Flatulence Fluid retention Flushing Folliculitis  
 Food interaction Formication Fungal infection Fungal skin  
 infection Furuncle Gait disturbance Galactorrhoea Gamma-  
 glutamyltransferase increased Gangrene Gastric disorder  
 Gastric pH decreased Gastric ulcer Gastric ulcer  
 haemorrhage Gastritis Gastroenteritis Gastrointestinal disorder  
 Gastrointestinal haemorrhage Gastrointestinal motility disorder

Gastrointestinal pain Gastrointestinal sounds abnormal  
 Gastrooesophageal reflux disease Generalised oedema  
 Genital discharge Genital disorder female Genital disorder  
 male Gigantism Gingival bleeding Gingival hyperplasia Gingival  
 pain Gingival recession Gingivitis Glaucoma Globulins  
 increased Glomerulonephritis membranous Glossitis Glossodynia  
 Glucose tolerance decreased Glucose tolerance impaired  
 Glycosuria Glycosylated haemoglobin increased Goitre Gout  
 Grand mal convulsion Groin pain Gynaecomastia  
 Haematemesis Haematochezia Haematocrit decreased  
 Haematoma Haematuria Haemoglobin Haemoglobin decreased  
 Haemoglobin increased Haemoglobinuria Haemolysis Haemolytic  
 anaemia Haemoptysis Haemorrhage Haemorrhage intracranial  
 Haemorrhagic disorder Haemorrhoids Hair disorder  
 Hallucination Hallucination, auditory Hallucination,  
 visual Halo vision Hangover Head and neck cancer Head  
 discomfort Headache Hearing impaired Heart disease congenital  
 Heart rate irregular Hemiparesis Hemiplegia Hepatic enzyme  
 increased Hepatic failure Hepatic function abnormal Hepatic  
 necrosis Hepatic steatosis Hepatitis Hepatobiliary disease  
 Hepatomegaly Hepatosplenomegaly Hernia Herpes  
 simplex Herpes virus infection Herpes zoster Hiccups  
 Hirsutism Homicidal ideation Hormone level abnormal  
 Hostility Hot flush Hyperacusis Hyperaemia Hyperaesthesia  
 Hyperbilirubinaemia Hypercalcaemia Hyperchloraemia  
 Hyperchlorhydria Hypercholesterolaemia Hyperglycaemia  
 Hyperhidrosis Hyperinsulinism Hyperkalaemia  
 Hyperkeratosis Hyperkinesia Hyperlipidaemia  
 Hypermagnesaemia Hypernatraemia Hyperparathyroidism  
 Hyperpathia Hyperphosphataemia Hyperplasia  
 Hyperprolactinaemia Hyperpyrexia Hyperreflexia  
 Hypersensitivity Hypersomnia Hypertension Hyperthermia  
 Hyperthermia malignant Hyperthyroidism Hypertonia Hypertonic  
 bladder Hypertriglyceridaemia Hypertrophy Hyperuricaemia  
 Hyperventilation Hypoaesthesia Hypoaesthesia oral  
 Hypocalcaemia Hypochloraemia Hypocholesterolaemia  
 Hypochromic anaemia Hypoglycaemia Hypohidrosis  
 Hypokalaemia Hypokinesia Hypomagnesaemia Hypomania  
 Hypomenorrhoea Hyponatraemia Hypophagia Hypophosphataemia  
 Hypoproteinaemia Hyporeflexia Hypotension Hypothermia  
 Hypothyroidism Hypotonia Hypoventilation Hypoxia  
 Idiopathic thrombocytopenic purpura Ileitis Ileus  
 paralytic Ill-defined disorder Immune system disorder  
 Immunoglobulins increased Impaired gastric emptying  
 Inappropriate antidiuretic hormone secretion Incontinence  
 Increased appetite Increased bronchial secretion  
 Induration Infarction Infection Infertility female  
 Infestation Inflammation Influenza Inguinal hernia  
 Injection site mass Injection site pain Injection site  
 phlebitis Injection site reaction Insomnia Intention tremor  
 Intentional self-injury Interstitial lung disease  
 Intestinal functional disorder Intestinal obstruction  
 Intestinal perforation Intraocular pressure increased  
 Iritis Iron deficiency Iron deficiency anaemia  
 Irritability Irritable bowel syndrome Ischaemia

Ischaemic stroke Jaundice Jaundice cholestatic Joint  
 contracture Joint range of motion decreased Joint stiffness Joint  
 swelling Judgement impaired Keratitis Keratoconjunctivitis  
 sicca Keratopathy Ketoacidosis Ketosis Laboratory test  
 abnormal Labyrinthitis Lacrimal disorder Lacrimation decreased  
 Lacrimation increased Laryngeal disorder Laryngitis  
 Laryngospasm Left ventricular failure Leiomyoma Lens  
 disorder Lenticular opacities Lenticular pigmentation  
 Lethargy Leukaemia Leukocytosis Leukoderma Leukopenia  
 Leukoplakia oral Libido decreased Libido increased Light  
 anaesthesia Lip blister Lip dry Liver disorder Liver function  
 test abnormal Logorrhoea Loss of consciousness Loss of libido  
 Lower respiratory tract infection Lung adenocarcinoma stage I  
 Lung disorder Lymphadenitis Lymphadenopathy Lymphocyte  
 count abnormal Lymphocytic leukaemia Lymphocytosis Lymphoedema  
 Lymphopenia Macular hole Macule Major depression  
 Malaise Male sexual dysfunction Malignant melanoma  
 Mania Masked facies Mass Mastitis Mediastinal disorder  
 Megacolon Melaena Memory impairment Meningitis Menopausal  
 symptoms Menorrhagia Menstrual disorder Menstruation irregular  
 Mental disability Mental disorder Mental retardation  
 Mental status changes Metrorrhagia Microcytic anaemia  
 Micturition disorder Micturition urgency Middle ear  
 disorder Migraine Miosis Mitral valve incompetence  
 Mobility decreased Monocytosis Mood swings Motion sickness  
 Mouth ulceration Movement disorder Mucosal inflammation  
 Mucosal ulceration Mucous membrane disorder Muscle  
 contractions involuntary Muscle contracture Muscle enzyme  
 increased Muscle relaxant therapy Muscle rigidity Muscle  
 spasms Muscle tightness Muscle twitching Muscular weakness  
 Musculoskeletal chest pain Musculoskeletal discomfort  
 Musculoskeletal disorder Musculoskeletal pain  
 Musculoskeletal stiffness Myalgia Myasthenic syndrome  
 Mydriasis Myelitis Myocardial infarction Myocardial  
 ischaemia Myocarditis Myoclonus Myopathy Myopia Myositis  
 Nail disorder Nasal congestion Nasal discomfort Nasal  
 disorder Nasal dryness Nasal oedema Nasal polyps  
 Nasopharyngitis Nausea Neck pain Necrosis Negativism  
 Neoplasm Neoplasm malignant Nephritis Nephrolithiasis  
 Nervous system disorder Nervousness Neuralgia Neuritis  
 Neurodermatitis Neuroleptic malignant syndrome  
 Neurological symptom Neuropathy peripheral Neurosis  
 Neutropenia Neutrophil count decreased Neutrophil count  
 increased Night blindness Night sweats Nightmare Nocturia  
 Nodal arrhythmia Nodal rhythm Normochromic normocytic  
 anaemia Nuchal rigidity Nystagmus Obesity Obsessive  
 thoughts Obstruction Obstructive airways disorder Ocular hyperaemia  
 Oculogyric crisis Oedema Oedema mouth Oedema peripheral  
 Oesophageal achalasia Oesophageal disorder Oesophageal ulcer  
 Oesophagitis Oliguria Onychomycosis Open angle  
 glaucoma Opisthotonus Optic neuritis Oral candidiasis Oral  
 disorder Oral pain Orchitis noninfective Orgasm abnormal  
 Oropharyngeal discomfort Oropharyngeal pain  
 Oropharyngeal spasm Orthostatic hypotension  
 Osteoarthritis Osteoarthropathy Osteopenia Osteoporosis

|                              |                                   |                              |                              |
|------------------------------|-----------------------------------|------------------------------|------------------------------|
| Otitis externa               | Otitis media                      | Ovarian cyst                 | Ovarian                      |
| disorder                     | Pain                              | Pain in extremity            | Pain in jaw                  |
| Palpitations                 | Pancreatitis                      | Pancreatitis acute           |                              |
| Pancytopenia                 | Panic attack                      | Panic disorder               | Panic                        |
| disorder with agoraphobia    | Panic reaction                    | Papule                       |                              |
| Paraesthesia oral            | Paralysis                         | Paranoia                     | Parity                       |
| Parkinsonian gait            | Parosmia                          | Parotid gland enlargement    |                              |
| Parotitis                    | Pathological fracture             | Pelvic pain                  | Peptic ulcer                 |
| Pericardial effusion         | Pericardial haemorrhage           |                              |                              |
| Pericarditis                 | Periodontitis                     | Periorbital oedema           |                              |
| Peripheral vascular disorder | Peritonitis                       | Personality disorder         |                              |
| Petechiae                    | Pharyngeal disorder               | Pharyngeal erythema          |                              |
| Pharyngeal oedema            | Pharyngitis                       | Phlebitis                    | Phobia                       |
| Phonological disorder        | Photophobia                       | Photopsia                    | Photosensitivity             |
| reaction                     | Platelet count decreased          | Platelet disorder            | Pleural                      |
| disorder                     | Pleural effusion                  | Pneumonia                    | Pneumonia aspiration         |
| Poisoning                    | Pollakiuria                       | Polycythaemia                | Polydipsia                   |
| Polyuria                     | Porphyria                         | Postpartum disorder          | Pregnancy                    |
| Premature baby               | Premature delivery                | Premature ejaculation        |                              |
| Premenstrual syndrome        | Pressure of speech                | Presyncope                   |                              |
| Priapism                     | Productive cough                  | Prostate cancer              | Prostatic                    |
| disorder                     | Prostatitis                       | Protein urine present        | Proteinuria                  |
| Protrusion                   | Pruritus                          | Pruritus genital             | Psoriasis                    |
| tongue                       | Psychomotor retardation           | Psychotic disorder           | Psychiatric                  |
| symptom                      | Pulmonary congestion              | Pulmonary embolism           | Pulmonary                    |
| fibrosis                     | Pulmonary function test decreased | Pulmonary hypertension       |                              |
| Pulmonary oedema             | Punctate keratitis                | Pupils unequal               |                              |
| Purpura                      | Pyelonephritis                    | Pyuria                       | Rales                        |
| Rash                         | Rash generalised                  | Rash macular                 | Rash maculo-                 |
| erythematous                 | Rash morbilliform                 | Rash papular                 | Rash pustular                |
| papular                      | Rash vesicular                    | Rectal haemorrhage           | Red blood                    |
| scarlatiniform               | Red blood cell count decreased    | Red blood cell               | sedimentation rate increased |
| behaviour                    | Reflux oesophagitis               | Regressive                   |                              |
| Renal failure acute          | Renal impairment                  | Renal pain                   |                              |
| Reproductive tract disorder  | Respiratory alkalosis             | Respiratory                  | Respiratory                  |
| arrest                       | Respiratory depression            | Respiratory disorder         | Respiratory                  |
| distress                     | Respiratory failure               | Respiratory tract congestion |                              |
| Respiratory tract infection  | Respiratory tract infection viral |                              |                              |
| Restless legs syndrome       | Retching                          | Retinal detachment           |                              |
| Retinal disorder             | Retinal haemorrhage               | Rhabdomyolysis               |                              |
| Rheumatoid arthritis         | Rhinitis                          | Rhinitis allergic            | Rhinitis                     |
| seasonal                     | Rhinorrhoea                       | Rhonchi                      | Rosacea                      |
| enlargement                  | Salivary gland                    | Salivary gland               | Salivary gland               |
| Salivary hypersecretion      | Salpingitis                       | Sarcosinaemia                |                              |
| Scab                         | Schizoaffective disorder          | Schizophreniform disorder    |                              |
| Sciatica                     | Scotoma                           | Seasonal allergy             | Seborrhoeic dermatitis       |
| Sedation                     | Sensation of heaviness            | Sensitisation                | Sensory                      |
| loss                         | Sepsis                            | Septic shock                 | Sexual dysfunction           |
| Sialoadenitis                | Sicca syndrome                    | Sinus arrest                 | Sinus                        |
| arrhythmia                   | Sinus bradycardia                 | Sinus congestion             | Sinus disorder               |
| headache                     | Sinus tachycardia                 | Sinusitis                    | Skin discolouration          |
| disorder                     | Skin exfoliation                  | Skin hypertrophy             | Skin irritation              |
| odour abnormal               | Skin ulcer                        | Skin warm                    | Sleep apnoea syndrome        |
| disorder                     | Sleep paralysis                   | Sleep talking                | Sluggishness                 |
| Sneezing                     | Social avoidant behaviour         | Somnambulism                 |                              |
| Somnolence                   | Speech disorder                   | Sputum increased             | Status                       |

asthmaticus Status epilepticus Stevens-Johnson syndrome  
 Stomatitis Strabismus Stridor Stupor Subarachnoid  
 haemorrhage Subdural haematoma Sudden death Suicidal ideation  
 Suicide attempt Suppressed lactation Supraventricular  
 extrasystoles Supraventricular tachycardia Surgery  
 Suspiciousness Swelling Swelling face Swollen tongue  
 Syncope Systemic lupus erythematosus Tachyarrhythmia  
 Tachycardia Tachypnoea Tardive dyskinesia Tearfulness  
 Temperature intolerance Tenderness Tendon disorder  
 Tendonitis Tenosynovitis Tension Tension headache  
 Teratogenicity Testicular disorder Testicular pain  
 Testicular swelling Tetany Thinking abnormal Thirst  
 Thought blocking Throat irritation Throat tightness  
 Thrombocytopenia Thrombocytopenic purpura Thrombocytosis  
 Thrombophlebitis Thrombosis Thyroiditis Tic Tinnitus  
 Tongue coated Tongue discolouration Tongue disorder  
 Tongue dry Tongue oedema Tongue paralysis Tongue spasm  
 Tonsillar hypertrophy Tooth abscess Tooth disorder Tooth  
 impacted Tooth infection Tooth malformation Toothache  
 Torsade de pointes Torticollis Toxic epidermal necrolysis  
 Tracheal disorder Transaminases increased Transient  
 ischaemic attack Tremor Trismus Tuberculin test positive  
 Tubulointerstitial nephritis Type I hypersensitivity Ulcer  
 Ulcer haemorrhage Ulcerative keratitis Unintended pregnancy  
 Upper respiratory tract infection Urethral disorder Urethral  
 pain Urethritis Urinary hesitation Urinary incontinence  
 Urinary retention Urinary tract disorder Urinary tract  
 infection Urine abnormality Urine analysis abnormal Urine  
 output increased Urosepsis Urticaria Uterine disorder Uterine  
 haemorrhage Uterine leiomyoma Uterine neoplasm Uterine spasm  
 Uterovaginal prolapse VIIIth nerve paralysis Vaginal discharge  
 Vaginal haemorrhage Vaginal infection Vaginal inflammation  
 Varicose vein Vascular headache Vascular purpura Vascular  
 resistance pulmonary increased Vascular resistance systemic  
 Vasculitis Vasoconstriction Vasodilation procedure Venous  
 thrombosis Ventricular arrhythmia Ventricular extrasystoles  
 Ventricular failure Ventricular fibrillation Ventricular  
 flutter Ventricular tachycardia Vertigo Viral diarrhoea  
 Viral infection Vision blurred Visual acuity reduced  
 Visual impairment Vomiting Vulvovaginal candidiasis  
 Vulvovaginal mycotic infection Vulvovaginal pruritus  
 Vulvovaginitis Water intoxication Weight decreased  
 Weight fluctuation Weight increased Wheezing White blood  
 cell count decreased White blood cell count increased White blood  
 cell disorder White blood cells urine positive Withdrawal  
 syndrome Xerophthalmia Xerosis Yawning

\*\*\*\*\*  
 \*\*\*\*\*

Calcium-activated potassium channel subunit beta-3 - Group: Channel  
 Treated with:  
 miconazole: approved small molecule (33 associated side effects)  
 For topical application in the treatment of tinea pedis  
 (athlete&rsquo;s foot), tinea cruris, and tinea corporis caused  
 by &lt;i>Trichophyton rubrum&lt;/i>, &lt;i>Trichophyton  
 mentagrophytes&lt;/i>, and &lt;i>Epidermophyton

floccosum</i>;, in the treatment of cutaneous candidiasis (moniliasis), and in the treatment of tinea versicolor.

33 known side effects mediated through drugs targeting this protein:  
Abdominal pain Anaphylactic shock Anaphylactoid reaction  
Angioedema Breast disorder Burning sensation Cardiac disorder  
Dermatitis Dermatitis contact Erythema Gastrointestinal  
pain Genital burning sensation Genital discharge Headache  
Immune system disorder Muscle spasms Nausea Nervous  
system disorder Oedema Pain Pelvic pain Pruritus genital Rash  
Respiratory disorder Respiratory tract infection Upper  
respiratory tract infection Urethral disorder Urinary tract disorder  
Urinary tract infection Urticaria Vaginal discharge  
Vulvovaginal discomfort Vulvovaginal erythema

\*\*\*\*\*  
\*\*\*\*\*

Secretin receptor - Group: Receptor

Treated with:

secretin: approved biotech (0 associated side effects) For  
diagnosis of pancreatic exocrine dysfunction and gastrinoma

known side effects mediated through drugs targeting this protein:

\*\*\*\*\*  
\*\*\*\*\*

Oxysterols receptor LXR-alpha - Group: Receptor

Treated with:

n-(2,2,2-trifluoroethyl)-n-{4-[2,2,2-trifluoro-1-hydroxy-1-(trifluoromethyl)ethyl]phenyl}benzenesulfonamide: experimental  
small molecule (0 associated side effects)  
n-(tert-butyl)-3,5-dimethyl-n'-[(5-methyl-2,3-dihydro-1,4-benzodioxin-6-yl)carbonyl]benzohydrazide: experimental small  
molecule (0 associated side effects)  
1-benzyl-3-(4-methoxyphenylamino)-4-phenylpyrrole-2,5-dione:  
experimental small molecule (0 associated side effects)  
(2e,4e)-11-methoxy-3,7,11-trimethyldodeca-2,4-dienoic acid:  
experimental small molecule (0 associated side effects)

known side effects mediated through drugs targeting this protein:

\*\*\*\*\*  
\*\*\*\*\*

Small conductance calcium-activated potassium channel protein 1 -  
Group: Channel

Treated with:

miconazole: approved small molecule (33 associated side effects)  
For topical application in the treatment of tinea pedis  
(athlete&rsquo;s foot), tinea cruris, and tinea corporis caused  
by <i>Trichophyton rubrum</i>, <i>Trichophyton  
mentagrophytes</i>, and <i>Epidermophyton  
floccosum</i>;, in the treatment of cutaneous candidiasis  
(moniliasis), and in the treatment of tinea versicolor.

33 known side effects mediated through drugs targeting this protein:

Abdominal pain    Anaphylactic shock    Anaphylactoid reaction  
 Angioedema    Breast disorder    Burning sensation    Cardiac disorder  
 Dermatitis    Dermatitis contact    Erythema    Gastrointestinal  
 pain    Genital burning sensation    Genital discharge    Headache  
 Immune system disorder    Muscle spasms    Nausea    Nervous  
 system disorder    Oedema    Pain    Pelvic pain    Pruritus genital    Rash  
 Respiratory disorder    Respiratory tract infection    Upper  
 respiratory tract infection    Urethral disorder    Urinary tract disorder  
 Urinary tract infection    Urticaria    Vaginal discharge  
 Vulvovaginal discomfort    Vulvovaginal erythema

\*\*\*\*\*  
 \*\*\*\*\*

Low affinity immunoglobulin gamma Fc region receptor II-c - Group:  
 Receptor

Treated with:

cetuximab: approved    biotech    (0 associated side effects) For  
 treatment of EGFR-expressing metastatic colorectal cancer in  
 patients who are refractory to other irinotecan-based chemotherapy  
 regimens. Cetuximab is also indicated for treatment of squamous cell  
 carcinoma of the head and neck in conjunction with radiation  
 therapy.

etanercept: approved    biotech    (0 associated side effects) For  
 treatment of severe active rheumatoid arthritis in adults, severe  
 juvenile idiopathic arthritis, ankylosing spondylitis, and severe  
 plaque psoriasis.

intravenous immunoglobulin: approved    biotech    (0 associated  
 side effects)    IVIg is used in the treatment of  
 immunodeficiencies, as well as autoimmune and inflammatory  
 disorders. These indications includes idiopathic thrombocytopenic  
 purpura, Kawasaki disease, hypogammaglobulinemia, B cell chronic  
 lymphocytic leukemia, bone marrow transplant complications,  
 Guillain-Barré syndrome, chronic inflammatory demyelinating  
 polyneuropathy (CIDP), multiple sclerosis, rheumatoid arthritis,  
 myasthenia gravis, Wiskott-Aldrich syndrome and inflammatory  
 skin diseases.

adalimumab: approved    biotech    (0 associated side effects) For  
 treatment of rheumatoid arthritis, psoriatic arthritis, ankylosing  
 spondylitis, and Crohn's disease.

abciximab: approved    biotech    (0 associated side effects)

gemtuzumab ozogamicin: approved    biotech    (0 associated side  
 effects)    For treatment of CD33-positive acute myeloid leukemia in  
 patients 60 and over who are not candidates for other chemotherapy.

trastuzumab: approved    biotech    (0 associated side effects)

For treatment of early stage HER2-positive breast cancer, or  
 metastatic breast cancer that substantially overexpress HER2.

rituximab: approved    biotech    (0 associated side effects) For  
 treatment of CD20-positive non-Hodgkins lymphoma, chronic  
 lymphocytic leukemia, and rheumatoid arthritis.

basiliximab: approved    biotech    (0 associated side effects)

For prophylactic treatment of kidney transplant rejection

muromonab: approved    biotech    (0 associated side effects) For  
 treatment of organ transplant recipients, prevention of organ  
 rejection

ibrutinomab: approved    biotech    (0 associated side effects)

For treatment of non-Hodgkin's lymphoma



tositumomab: approved biotech (0 associated side effects)  
 For treatment of non-Hodgkin's lymphoma (CD20 positive, follicular)

alemtuzumab: approved biotech (0 associated side effects)  
 Alemtuzumab (Campath) is a monoclonal antibody therapy used for treatment of B-cell chronic lymphocytic leukemia.

alefacept: approved biotech (0 associated side effects) As an immunosuppressive drug, Alefacept can be used for treatment of moderate to severe chronic plaque psoriasis

efalizumab: approved biotech (0 associated side effects) For the treatment of adult patients with moderate to severe chronic plaque psoriasis, who are candidates for phototherapy or systemic therapy.

natalizumab: approved biotech (0 associated side effects)  
 For treatment of multiple sclerosis.

palivizumab: approved biotech (0 associated side effects)  
 For prophylaxis of respiratory diseases caused by respiratory syncytial virus.

daclizumab: approved biotech (0 associated side effects)  
 Zenapax is a humanized monoclonal antibody used for prevention of renal transplant rejection

bevacizumab: approved biotech (0 associated side effects)  
 As part of combination therapy for metastatic colorectal cancer and HER2-negative metastatic breast cancer.

known side effects mediated through drugs targeting this protein:

\*\*\*\*\*  
 \*\*\*\*\*

Excitatory amino acid transporter 4 - Group: Transporter  
 Treated with:  
 l-glutamic acid: approved, nutraceutical small molecule (0 associated side effects) Considered to be nature's "Brain food" by improving mental capacities; helps speed the healing of ulcers; gives a "lift" from fatigue; helps control alcoholism, schizophrenia and the craving for sugar.

known side effects mediated through drugs targeting this protein:

\*\*\*\*\*  
 \*\*\*\*\*

Receptor activity-modifying protein 3 - Group: Other  
 Treated with:  
 pramlintide: approved biotech (17 associated side effects)  
 For the treatment of type 1 and type 2 diabetes mellitus as an adjunct to preprandial insulin therapy in patients without adequate glycemic control of insulin therapy.

17 known side effects mediated through drugs targeting this protein:  
 Abdominal pain Arthralgia Asthenia Cough Decreased appetite  
 Dizziness Fatigue Gastrointestinal pain Headache  
 Hypersensitivity Hypoglycaemia Injection site reaction  
 Musculoskeletal discomfort Nausea Pain Pharyngitis  
 Vomiting

\*\*\*\*\*  
\*\*\*\*\*

Mannose-6-phosphate receptor-binding protein 1 - Group: Other

Treated with:

idursulfase: approved biotech (0 associated side effects)

For the treatment of Hunter syndrome in adults and children ages 5 and older.

galsulfase: approved biotech (0 associated side effects) For the treatment of adults and children with Mucopolysaccharidosis VI.

known side effects mediated through drugs targeting this protein:

\*\*\*\*\*  
\*\*\*\*\*

Monocarboxylate transporter 10 - Group: Transporter

Treated with:

l-histidine: approved, nutraceutical small molecule (0 associated side effects) The actions of supplemental L-histidine are entirely unclear. It may have some immunomodulatory as well as antioxidant activity. L-histidine may be indicated for use in some with rheumatoid arthritis. It is not indicated for treatment of anemia or uremia or for lowering serum cholesterol.

pyruvic acid: approved, nutraceutical small molecule (0 associated side effects) For nutritional supplementation, also for treating dietary shortage or imbalance

l-phenylalanine: approved, nutraceutical small molecule (0 associated side effects) L-phenylalanine may be helpful in some with depression. It may also be useful in the treatment of vitiligo. There is some evidence that L-phenylalanine may exacerbate tardive dyskinesia in some schizophrenic patients and in some who have used neuroleptic drugs.

l-lysine: approved, nutraceutical small molecule (0 associated side effects) Supplemental L-lysine has putative anti-herpes simplex virus activity. There is preliminary research suggesting that it may have some anti-osteoporotic activity.

l-arginine: approved, nutraceutical small molecule (20 associated side effects) Used for nutritional supplementation, also for treating dietary shortage or imbalance.

l-aspartic acid: approved, nutraceutical small molecule (0 associated side effects) There is no support for the claim that aspartates are exercise performance enhancers, i.e. ergogenic aids.

l-glutamine: approved, nutraceutical small molecule (0 associated side effects) Used for nutritional supplementation, also for treating dietary shortage or imbalance.

l-serine: approved, nutraceutical small molecule (0 associated side effects) Used as a natural moisturizing agent in some cosmetics and skin care products.

l-methionine: approved, nutraceutical small molecule (0 associated side effects) Used for protein synthesis including the formation of SAME, L-homocysteine, L-cysteine, taurine, and sulfate.

l-tyrosine: approved, nutraceutical small molecule (0 associated side effects) Tyrosine is claimed to act as an effective antidepressant, however results are mixed. Tyrosine has also been

claimed to reduce stress and combat narcolepsy and chronic fatigue, however these claims have been refuted by some studies.

l-cystine: approved, nutraceutical small molecule (0 associated side effects) It has been claimed that L-cysteine has anti-inflammatory properties, that it can protect against various toxins, and that it might be helpful in osteoarthritis and rheumatoid arthritis. More research will have to be done before L-cysteine can be indicated for any of these conditions. Research to date has mostly been in animal models.

l-glutamic acid: approved, nutraceutical small molecule (0 associated side effects) Considered to be nature's "Brain food" by improving mental capacities; helps speed the healing of ulcers; gives a "lift" from fatigue; helps control alcoholism, schizophrenia and the craving for sugar.

glycine: approved, nutraceutical small molecule (38 associated side effects) Supplemental glycine may have antispastic activity. Very early findings suggest it may also have antipsychotic activity as well as antioxidant and anti-inflammatory activities.

l-leucine: approved, nutraceutical small molecule (0 associated side effects) Indicated to assist in the prevention of the breakdown of muscle proteins that sometimes occur after trauma or severe stress.

l-tryptophan: approved, nutraceutical small molecule (11 associated side effects) Tryptophan may be useful in increasing serotonin production, promoting healthy sleep, managing depression by enhancing mental and emotional well-being, managing pain tolerance, and managing weight.

l-cysteine: approved, nutraceutical small molecule (0 associated side effects) For the prevention of liver damage and kidney damage associated with overdoses of acetaminophen

l-threonine: approved, nutraceutical small molecule (0 associated side effects) L-Threonine makes up collagen, elastin, and enamel protein. It aids proper fat metabolism in the liver, helps the digestive and intestinal tracts function more smoothly, and assists in metabolism and assimilation.

l-alanine: approved, nutraceutical small molecule (0 associated side effects) Used for protein synthesis.

l-valine: approved, nutraceutical small molecule (0 associated side effects) Promotes mental vigor, muscle coordination, and calm emotions. May also be of use in a minority of patients with hepatic encephalopathy and in some with phenylketonuria.

l-isoleucine: approved, nutraceutical small molecule (0 associated side effects) The branched-chain amino acids may have antihepatic encephalopathy activity in some. They may also have anticatabolic and antitardive dyskinesia activity.

l-proline: approved, nutraceutical small molecule (0 associated side effects) L-Proline is extremely important for the proper functioning of joints and tendons and also helps maintain and strengthen heart muscles.

l-asparagine: approved, nutraceutical small molecule (0 associated side effects) Used for nutritional supplementation, also for treating dietary shortage or imbalance.

liothyronine: approved small molecule (0 associated side effects) Used as replacement or supplemental therapy in patients

with hypothyroidism of any etiology, except transient hypothyroidism during the recovery phase of subacute thyroiditis.

levodopa: approved small molecule (0 associated side effects)

For the treatment of idiopathic Parkinson's disease (Paralysis Agitans), postencephalitic parkinsonism, symptomatic parkinsonism which may follow injury to the nervous system by carbon monoxide intoxication, and manganese intoxication.

liotrix: approved small molecule (0 associated side effects)

May be used to treat primary, secondary or tertiary hypothyroidism. May also be used to suppress thyroid stimulating hormone (TSH) secretion in patients with simple (nontoxic) goiter, subacute or chronic lymphocytic thyroiditis multinodular goiter, and in the management of thyroid cancer. May be used in conjunction with other antithyroid agents to treat thyrotoxicosis to prevent goitrogenesis and hypothyroidism. May also be used for differential diagnosis of suspected mild hyperthyroidism or thyroid gland autonomy.

d-leucine: experimental small molecule (0 associated side effects)

d-alanine: experimental small molecule (0 associated side effects)

d-phenylalanine: experimental small molecule (0 associated side effects)

alpha-aminoisobutyric acid: experimental small molecule (0 associated side effects)

beta-alanine: experimental small molecule (0 associated side effects)

d-tryptophan: experimental small molecule (0 associated side effects)

d-tyrosine: experimental small molecule (0 associated side effects)

d-serine: experimental small molecule (0 associated side effects)

lactic acid: experimental small molecule (0 associated side effects)

droxidopa: approved small molecule (0 associated side effects)

For treatment of neurogenic orthostatic hypotension (NOH) associated with various disorders including Multiple System Atrophy, Familial Amyloid Polyneuropathy, hemodialysis induced hypotension and Parkinson's Disease. Also investigated for use/treatment in neurologic disorders, nephropathy, blood (blood forming organ disorders, unspecified), and dizzy/fainting spells.

60 known side effects mediated through drugs targeting this protein:

|          |                              |                  |                      |                          |
|----------|------------------------------|------------------|----------------------|--------------------------|
| Acidosis | Agitation                    | Alopecia         | Anaphylactic shock   | Angina                   |
| pectoris | Back pain                    | Blindness        | Blindness transient  | Chills                   |
|          | Coma                         | Convulsion       | Cyanosis             | Decreased appetite       |
|          |                              |                  |                      | Dehydration              |
|          | Dermatitis                   | Diarrhoea        | Disinhibition        | Dizziness                |
|          |                              |                  |                      | Dry mouth                |
|          | Electrolyte imbalance        | Encephalopathy   | Extravasation        | Fluid                    |
| overload | Flushing                     | Haematuria       | Headache             | Hyperammonaemia          |
|          | Hyperkinesia                 | Hypersensitivity | Hypoaesthesia        |                          |
|          | Hyponatraemia                | Hypotension      | Lung disorder        | Nausea                   |
|          | Necrosis                     | Oedema           | Pain                 | Platelet count decreased |
|          | Polyuria                     | Psoriasis        | Pulmonary congestion | Rash                     |
| macular  | Respiratory tract congestion | Rhinitis         | Salivary             |                          |

hypersecretion    Sensory loss        Skin exfoliation    Skin necrosis  
Somnolence    Surgery        Swelling        Tachycardia    Thirst  
Thrombophlebitis    Urinary retention    Urticaria    Vertigo  
Visual impairment    Vomiting

\*\*\*\*\*  
\*\*\*\*\*

Alpha-2B adrenergic receptor - Group: Receptor

Treated with:

bethanidine:        approved    small molecule    (0 associated side effects)    For the treatment of hypertension.

ziprasidone:        approved    small molecule    (251 associated side effects)    For the treatment of schizophrenia and related psychotic disorders.

cabergoline:        approved    small molecule    (96 associated side effects)    For the treatment of hyperprolactinemic disorders, either idiopathic or due to prolactinoma (prolactin-secreting adenomas). May also be used to manage symptoms of Parkinsonian Syndrome as monotherapy during initial symptomatic management or as an adjunct to levodopa therapy during advanced stages of disease.

ropinirole:        approved    small molecule    (631 associated side effects)    For the treatment of the signs and symptoms of idiopathic Parkinson's disease. Also used for the treatment of restless legs syndrome.

etomidate:        approved    small molecule    (27 associated side effects)    Used in the induction of general anesthesia.

olanzapine:        approved    small molecule    (393 associated side effects)    For the acute and maintenance treatment of schizophrenia and related psychotic disorders, as well as acute treatment of manic or mixed episodes of bipolar 1 disorder. Intramuscular olanzapine is indicated for the rapid control of agitated patients.

clozapine:        approved    small molecule    (228 associated side effects)    For use in patients with treatment-resistant schizophrenia.

norepinephrine:    approved    small molecule    (22 associated side effects)    Mainly used to treat patients in vasodilatory shock states such as septic shock and neurogenic shock and has shown a survival benefit over dopamine. Also used as a vasopressor medication for patients with critical hypotension.

pramipexole:        approved    small molecule    (620 associated side effects)    For the treatment of signs and symptoms of idiopathic Parkinson's disease

brimonidine:        approved    small molecule    (109 associated side effects)    For the lowering of intraocular pressure in patients with open-angle glaucoma or ocular hypertension.

clonidine:        approved    small molecule    (161 associated side effects)    May be used as an adjunct in the treatment of hypertension, as an epidural infusion as an adjunct treatment in the management of severe cancer pain that is not relieved by opiate analgesics alone, for differential diagnosis of pheochromocytoma in hypertensive patients, prophylaxis of vascular migraine headaches, treatment of severe dysmenorrhea, management of vasomotor symptoms associated with menopause, rapid detoxification in the management of opiate withdrawal, treatment of alcohol withdrawal used in conjunction with benzodiazepines, management of nicotine dependence, topical use to reduce intraocular pressure in the treatment of open-

angle and secondary glaucoma and hemorrhagic glaucoma associated with hypertension, and in the treatment of attention-deficit hyperactivity disorder (ADHD).

lisuride: approved small molecule (0 associated side effects)  
For the management of Parkinson's Disease

ergotamine: approved small molecule (15 associated side effects)  
For use as therapy to abort or prevent vascular headache, e.g., migraine, migraine variants, or so called "histaminic cephalalgia".

tizanidine: approved small molecule (230 associated side effects)  
For the management of increased muscle tone associated with spasticity

apomorphine: approved small molecule (45 associated side effects)  
For the acute, intermittent treatment of hypomobility, off episodes (end-of-dose wearing off and unpredictable on/off episodes) associated with advanced Parkinson's disease.

trimipramine: approved small molecule (0 associated side effects)  
For the treatment of depression and depression accompanied by anxiety, agitation or sleep disturbance

risperidone: approved small molecule (532 associated side effects)  
For the treatment of schizophrenia in adults and in adolescents, ages 13 to 17, and for the short-term treatment of manic or mixed episodes of bipolar I disorder in children and adolescents ages 10 to 17. May also be used to manage symptoms of inappropriate behavior due to aggression and/or psychosis in patients with severe dementia.

fenoldopam: approved small molecule (51 associated side effects)  
For the in-hospital, short-term (up to 48 hours) management of severe hypertension when rapid, but quickly reversible, emergency reduction of blood pressure is clinically indicated, including malignant hypertension with deteriorating end-organ function.

phenoxybenzamine: approved small molecule (9 associated side effects)  
For the treatment of pheochromocytoma (malignant), benign prostatic hypertrophy and malignant essential hypertension.

doxepin: approved small molecule (210 associated side effects)  
Labeled indications: depression and insomnia. Unlabeled indications: chronic and neuropathic pain, anxiety, idiopathic urticaria.

pergolide: approved, withdrawn small molecule (354 associated side effects)  
Indicated as adjunctive treatment to

levodopa/carbidopa in the management of the signs and symptoms of Parkinson's disease. It was withdrawn from the US and Canadian markets in 2007 due to an increased risk of cardiac valvulopathy.

bromocriptine: approved small molecule (120 associated side effects)  
For the treatment of galactorrhea due to hyperprolactinemia, prolactin-dependent menstrual disorders and infertility, prolactin-secreting adenomas, prolactin-dependent male hypogonadism, as adjunct therapy to surgery or radiotherapy for acromegaly or as monotherapy is special cases, as monotherapy in early Parkinsonian Syndrome or as an adjunct with levodopa in advanced cases with motor complications. Bromocriptine has also been used off-label to treat restless legs syndrome and neuroleptic malignant syndrome.

quetiapine: approved small molecule (359 associated side effects) For the treatment of schizophrenia and related psychotic disorders.

aripiprazole: approved small molecule (630 associated side effects) For the treatment of schizophrenia and related psychotic disorders.

paliperidone: approved small molecule (216 associated side effects) For the treatment of schizophrenia.

ephedra: approved,withdrawn,nutraceutical small molecule (0 associated side effects) Ephedra is widely used by athletes, despite a lack of evidence that it enhances athletic performance. Ephedra has also been used for weight loss.

yohimbine: approved small molecule (0 associated side effects) Indicated as a sympatholytic and mydriatic. Impotence has been successfully treated with yohimbine in male patients with vascular or diabetic origins and psychogenic origins.

methotrimeprazine: approved small molecule (0 associated side effects) For the treatment of psychosis, particular those of schizophrenia, and manic phases of bipolar disorder.

methamphetamine: illicit,approved small molecule (30 associated side effects) For the treatment of Attention Deficit Disorder with Hyperactivity (ADHD) and exogenous obesity.

droxidopa: approved small molecule (0 associated side effects) For treatment of neurogenic orthostatic hypotension (NOH) associated with various disorders including Multiple System Atrophy, Familial Amyloid Polyneuropathy, hemodialysis induced hypotension and Parkinson's Disease. Also investigated for use/treatment in neurologic disorders, nephropathy, blood (blood forming organ disorders, unspecified), and dizzy/fainting spells.

xylometazoline: approved small molecule (0 associated side effects) It is used for treating nasal congestion and minor inflammation due to allergies or colds.

1313 known side effects mediated through drugs targeting this protein:

Abasia Abdominal adhesions Abdominal discomfort Abdominal distension Abdominal neoplasm Abdominal pain Abdominal pain lower Abdominal pain upper Abdominal tenderness Abnormal behaviour Abnormal dreams Abnormal faeces Abscess Accommodation disorder Acidosis Acne Actinic keratosis Acute abdomen Acute coronary syndrome Acute lymphocytic leukaemia Acute psychosis Acute tonsillitis Adenocarcinoma Adenoma benign Adhesion Adjustment disorder Adrenal insufficiency Affect lability Affective disorder Ageusia Aggression Agitation Agoraphobia Agranulocytosis Akathisia Akinesia Alanine aminotransferase increased Albright's disease Albuminuria Alcohol intolerance Alkalosis Alopecia Altered state of consciousness Amaurosis fugax Amblyopia Amenorrhoea Amnesia Anaemia Anaemia macrocytic Anaemia megaloblastic Analgesic therapy Anaphylactic shock Anaphylactoid reaction Aneurysm Anger Angina pectoris Angina unstable Angioedema Angiomyolipoma Angiopathy Angle closure glaucoma Anorectal discomfort Anorectal disorder Anorgasmia Antidiuretic hormone abnormality Antisocial behaviour Antisocial personality disorder Anxiety Aortic

dissection Apathy Aphasia Aphthous stomatitis Apnoea  
 Appendicitis Application site reaction Apraxia  
 Arrhythmia Arrhythmia supraventricular Arterial disorder  
 Arterial occlusive disease Arterial stenosis Arteriosclerosis  
 Arteritis Arthralgia Arthritis Arthropathy Ascites  
 Asocial behaviour Aspartate aminotransferase increased  
 Asphyxia Aspiration Asthenia Asthma Ataxia  
 Atelectasis Atrial fibrillation Atrial flutter Atrial  
 septal defect Atrioventricular block first degree  
 Atrioventricular block second degree Atrophy Aura  
 Automatism Autonomic nervous system imbalance Azotaemia Back  
 pain Bacterial infection Balance disorder Balanoposthitis Basal  
 cell carcinoma Basophilia Benign intracranial hypertension  
 Benign neoplasm Benign neoplasm of skin Benign prostatic  
 hyperplasia Biliary colic Binge eating Bladder cancer  
 Bladder disorder Bladder pain Blepharitis Blepharospasm  
 Blindness Blindness transient Blister Blood alkaline  
 phosphatase increased Blood amylase increased Blood  
 antidiuretic hormone abnormal Blood bilirubin increased Blood  
 cholesterol increased Blood creatine phosphokinase increased Blood  
 creatinine increased Blood electrolytes abnormal Blood glucose  
 decreased Blood glucose increased Blood insulin increased  
 Blood iron decreased Blood lactate dehydrogenase increased  
 Blood phosphorus increased Blood potassium decreased Blood  
 potassium increased Blood pressure abnormal Blood pressure  
 diastolic decreased Blood pressure fluctuation Blood pressure  
 increased Blood pressure systolic decreased Blood prolactin  
 increased Blood testosterone decreased Blood triglycerides  
 increased Blood triglycerides normal Blood urea increased Blood  
 uric acid increased Blood urine Blood urine present Blunted  
 affect Body temperature decreased Body temperature increased  
 Bone disorder Bone pain Bone sarcoma Bradycardia  
 Bradykinesia Bradyphrenia Brain neoplasm Brain  
 neoplasm benign Brain oedema Breast cancer Breast cyst  
 Breast discharge Breast discomfort Breast disorder Breast  
 disorder female Breast disorder male Breast engorgement  
 Breast enlargement Breast feeding Breast neoplasm  
 Breast pain Breast swelling Breast tenderness Breath odour  
 Bronchiolitis Bronchitis Bronchopneumonia  
 Bronchopneumopathy Bronchospasm Bruxism  
 Buccoglossal syndrome Bulimia nervosa Bundle branch block  
 Bundle branch block left Bundle branch block right  
 Burning sensation Bursitis Cachexia Calculus bladder  
 Calculus urinary Cancer in remission Candidiasis  
 Carbohydrate tolerance decreased Cardiac arrest Cardiac  
 disorder Cardiac failure Cardiac failure congestive Cardiac  
 fibrillation Cardiac flutter Cardiac murmur Cardiac septal  
 defect Cardiac valve disease Cardio-respiratory arrest  
 Cardiomegaly Cardiomyopathy Cardiopulmonary failure  
 Cardiovascular disorder Carotid artery occlusion  
 Carpal tunnel syndrome Cataplexy Cataract Catatonia Cells  
 in urine Cellulitis Cerebral artery embolism Cerebral atrophy  
 Cerebral haemorrhage Cerebral infarction Cerebral  
 ischaemia Cerebrospinal fluid rhinorrhoea Cerebrovascular  
 accident Cerebrovascular disorder Cervicitis Cervix carcinoma



Chapped lips      Cheilitis      Chest discomfort      Chest pain  
 Chills      Choking      Cholecystitis      Cholecystitis chronic  
 Cholelithiasis      Cholestasis      Chorea      Choreoathetosis  
 Chromaturia      Chronic lymphocytic leukaemia      Chronic  
 obstructive pulmonary disease      Coagulopathy      Coccydynia  
 Cognitive disorder      Cogwheel rigidity      Cold sweat      Colitis  
 Colitis ulcerative      Colon cancer      Colonic pseudo-  
 obstruction      Colorectal cancer      Coma      Completed suicide      Compulsions  
 Condition aggravated      Confusional state      Congenital anomaly  
 Congenital eye disorder      Congenital foot malformation  
 Congenital genitourinary abnormality      Conjunctival follicles  
 Conjunctival haemorrhage      Conjunctival hyperaemia  
 Conjunctival oedema      Conjunctivitis      Conjunctivitis  
 allergic      Connective tissue disorder      Constipation      Convulsion  
 Coombs test positive      Coordination abnormal      Corneal erosion  
 Corneal lesion      Corneal staining      Coronary artery disease  
 Coronary artery occlusion      Costochondritis      Cough      Crocodile  
 tears syndrome      Crying      Cyanosis      Cystitis      Cystitis  
 noninfective      Cytolytic hepatitis      Dandruff      Deafness      Death  
 Decreased appetite      Decubitus ulcer      Deep vein thrombosis  
 Deficiency anaemia      Dehydration      Delirium      Delusion  
 Dementia      Dementia with Lewy bodies      Dental caries  
 Dependence      Depersonalisation      Depressed level of consciousness  
 Depressed mood      Depression      Depressive symptom  
 Derealisation      Dermal cyst      Dermatitis atopic      Dermatitis  
 bullous      Dermatitis contact      Dermatitis exfoliative      Dermatitis  
 infected      Dermoid cyst      Developmental delay      Device related  
 infection      Diabetes mellitus      Diabetic coma      Diabetic  
 hyperglycaemic coma      Diabetic hyperosmolar coma      Diabetic  
 ketoacidosis      Diaphragmatic hernia      Diarrhoea      Diplopia  
 Discomfort      Disinhibition      Disorientation      Disseminated  
 intravascular coagulation      Dissociation      Disturbance in  
 attention      Disturbance in sexual arousal      Diverticulitis  
 Dizziness      Dizziness exertional      Dizziness postural  
 Drooling      Drug abuse      Drug dependence      Drug eruption      Drug  
 hypersensitivity      Drug ineffective      Drug interaction      Drug level  
 increased      Drug withdrawal syndrome      Drug withdrawal syndrome  
 neonatal      Dry eye      Dry mouth      Dry skin      Dry throat      Duodenal  
 ulcer      Duodenal ulcer haemorrhage      Duodenitis      Dysarthria      Dysentery  
 Dysgeusia      Dysgraphia      Dyskinesia      Dysmenorrhoea      Dyspepsia  
 Dysphagia      Dysphemia      Dysphonia      Dysphoria      Dyspnoea  
 Dyspnoea exertional      Dystonia      Dysuria      Ear disorder  
 Ear infection      Ear pain      Ecchymosis      Eclampsia      Eczema  
 Effusion      Ejaculation delayed      Ejaculation disorder  
 Ejaculation failure      Elastosis perforans      Elderly  
 Electrocardiogram QRS complex      Electrocardiogram QT  
 prolonged      Electrocardiogram ST segment depression      Electrocardiogram  
 ST segment elevation      Electrocardiogram T wave inversion  
 Electrocardiogram abnormal      Electrocardiogram change  
 Electroencephalogram abnormal      Electrolyte imbalance  
 Elevated mood      Embolism      Emotional disorder      Emotional  
 distress      Emphysema      Encephalopathy      Endocrine disorder  
 Endometrial cancer      Endometrial neoplasm      Energy increased  
 Enteritis      Enuresis      Enzyme abnormality      Eosinophil count  
 increased      Eosinophilia      Epicondylitis      Epididymitis

Epilepsy Epistaxis Erectile dysfunction Eructation  
 Erythema Erythema multiforme Erythema of eyelid  
 Erythromelalgia Euphoric mood Exfoliative rash Exostosis  
 Extradural abscess Extrapyrarnidal disorder  
 Extrasystoles Extravasation Eye discharge Eye  
 disorder Eye haemorrhage Eye infection Eye inflammation Eye  
 irritation Eye movement disorder Eye pain Eye pruritus Eye  
 swelling Eyelid disorder Eyelid function disorder Eyelid  
 oedema Eyelid ptosis Eyelids pruritus Face oedema Facial pain  
 Facial paresis Faecal incontinence Faecalith Faecaloma  
 Faeces discoloured Faeces hard Fasciitis Fasting  
 Fatigue Fear Feeling abnormal Feeling cold Feeling hot  
 Feeling jittery Female sexual dysfunction Fibroadenoma of  
 breast Fibrocystic breast disease Fibrosis Flank pain Flat  
 affect Flatulence Fluid overload Fluid retention Flushing  
 Foetor hepaticus Folliculitis Formication Fungal infection  
 Fungal skin infection Furuncle Gait disturbance  
 Galactorrhoea Gallbladder cancer Gallbladder disorder  
 Gamma-glutamyltransferase increased Gangrene Gastric  
 cancer Gastric disorder Gastric haemorrhage Gastric pH  
 decreased Gastric polyps Gastric ulcer Gastric ulcer  
 haemorrhage Gastritis Gastritis haemorrhagic Gastroenteritis  
 Gastrointestinal disorder Gastrointestinal haemorrhage  
 Gastrointestinal infection Gastrointestinal neoplasm  
 Gastrointestinal obstruction Gastrointestinal pain  
 Gastrointestinal stromal tumour Gastrointestinal tract  
 irritation Gastrooesophageal reflux disease Generalised oedema  
 Genital candidiasis Genital discharge Gestational  
 hypertension Gingival bleeding Gingival infection Gingival  
 pain Gingival recession Gingivitis Glaucoma Glossitis  
 Glossodynia Glucose tolerance decreased Glucose tolerance  
 impaired Glycosuria Glycosylated haemoglobin increased Goitre  
 Gout Grand mal convulsion Gravitational oedema Groin pain  
 Gynaecomastia Haemangioma Haematemesi Haematochezia  
 Haematocrit decreased Haematoma Haematuria Haemoglobin  
 Haemoglobin decreased Haemoglobin increased Haemoglobinuria  
 Haemolysis Haemoptysis Haemorrhage Haemorrhage intracranial  
 Haemorrhoids Haemothorax Hallucination Hallucination,  
 auditory Hallucination, visual Hallucinations, mixed Hangover  
 Head discomfort Head titubation Headache Hearing impaired  
 Heart disease congenital Heart rate irregular Hemianopia  
 Hemiparesis Hemiplegia Hepatic cirrhosis Hepatic enzyme  
 increased Hepatic failure Hepatic fibrosis Hepatic function  
 abnormal Hepatic necrosis Hepatic neoplasm malignant Hepatic  
 steatosis Hepatitis Hepatitis cholestatic Hepatitis fulminant  
 Hepatobiliary disease Hepatocellular injury Hepatomegaly  
 Hereditary disorder Hernia Herpes simplex Herpes  
 virus infection Herpes zoster Hiccups Hirsutism Homicidal  
 ideation Hordeolum Hormone level abnormal Hostility Hot flush  
 Hunger Hydrocephalus Hyperacusis Hyperaemia  
 Hyperaesthesia Hyperbilirubinaemia Hyperchloraemia  
 Hyperchlorhydria Hypercholesterolaemia Hyperglycaemia  
 Hyperhidrosis Hyperinsulinism Hyperkalaemia  
 Hyperkeratosis Hyperkinesia Hyperlipidaemia  
 Hypermagnesaemia Hypernatraemia Hyperparathyroidism

Hyperphagia Hyperphosphataemia Hyperplasia  
Hyperprolactinaemia Hyperpyrexia Hyperreflexia  
Hypersensitivity Hypersexuality Hypersomnia Hypertension  
Hypertensive crisis Hyperthermia Hyperthyroidism  
Hypertonia Hypertonic bladder Hypertrichosis  
Hypertriglyceridaemia Hypertrophy Hyperuricaemia  
Hyperuricosuria Hyperventilation Hypoaesthesia  
Hypoaesthesia oral Hypocalcaemia Hypochloraemia  
Hypocholesterolaemia Hypochromic anaemia Hypoglycaemia  
Hypogonadism Hypohidrosis Hypokalaemia Hypokinesia  
Hypomagnesaemia Hypomania Hypomenorrhoea Hyponatraemia  
Hypophagia Hypoproteinaemia Hyporeflexia Hypotension  
Hypothermia Hypothyroidism Hypotonia Hypoventilation  
Hypovitaminosis Hypovolaemia Hypoxia Idiopathic  
thrombocytopenic purpura Ileus Ileus paralytic Ill-defined  
disorder Illusion Immune system disorder Impaired healing  
Inappropriate antidiuretic hormone secretion Incontinence  
Increased appetite Induration Infarction Infected cyst  
Infection Infestation Inflammation Influenza Influenza  
like illness Inguinal hernia Initial insomnia Injection site  
mass Injection site pain Injection site reaction Inner ear  
disorder Insomnia Intention tremor Intentional self-injury  
Intermittent claudication Interstitial lung disease  
Intervertebral disc degeneration Intervertebral disc disorder  
Intervertebral disc protrusion Intervertebral discitis  
Intestinal functional disorder Intestinal obstruction  
Intestinal perforation Intracranial pressure increased  
Iritis Iron deficiency Iron deficiency anaemia  
Irritability Irritable bowel syndrome Ischaemia  
Ischaemic hepatitis Ischaemic stroke Jaundice Jaundice  
cholestatic Joint contracture Joint effusion Joint range of motion  
decreased Joint stiffness Joint swelling Judgement impaired  
Keratitis Keratoconjunctivitis sicca Keratopathy  
Ketoacidosis Ketosis Laboratory test abnormal  
Lacrimal disorder Lacrimation decreased Lacrimation increased  
Lactic acidosis Lactose intolerance Laryngeal cancer  
Laryngeal disorder Laryngeal neoplasm Laryngeal oedema  
Laryngitis Laryngospasm Left ventricular failure  
Leiomyoma Lens disorder Lenticular opacities Lenticular  
pigmentation Lethargy Leukaemia Leukocytosis Leukoderma  
Leukopenia Leukoplakia oral Libido decreased Libido increased  
Lichenoid keratosis Lip and/or oral cavity cancer Lip  
blister Lip dry Lip swelling Lipoma Livedo  
reticularis Liver disorder Liver function test abnormal Liver  
injury Lividity Lobar pneumonia Local reaction Localised  
infection Localised oedema Logorrhoea Loss of consciousness Loss  
of libido Lower respiratory tract infection Lung adenocarcinoma  
stage I Lung cancer metastatic Lung disorder Lung infiltration  
Lung neoplasm malignant Lymphadenitis Lymphadenopathy  
Lymphatic disorder Lymphocytic leukaemia Lymphocytosis  
Lymphoedema Lymphoma Lymphopenia Macular degeneration  
Macule Maculopathy Major depression Malaise Male sexual  
dysfunction Malignant melanoma Mania Masked facies Mastitis  
Mediastinal disorder Melaena Melanocytic naevus  
Memory impairment Meningitis Menopausal symptoms Menopause

Menorrhagia Menstrual disorder Menstruation delayed  
Menstruation irregular Mental disability Mental disorder  
Mental retardation Mental status changes Metabolic  
alkalosis Metastasis Metastatic neoplasm Metrorrhagia  
Micturition disorder Micturition urgency Middle ear  
disorder Middle ear effusion Middle insomnia Migraine with  
aura Migraine without aura Miosis Mitral valve incompetence  
Mobility decreased Monarthrititis Monocytosis Mood swings  
Motion sickness Mouth ulceration Movement disorder Multiple  
hereditary exostosis Multiple myeloma Muscle atrophy Muscle  
contractions involuntary Muscle contracture Muscle enzyme  
increased Muscle relaxant therapy Muscle rigidity Muscle  
spasms Muscle tightness Muscle twitching Muscular weakness  
Musculoskeletal chest pain Musculoskeletal discomfort  
Musculoskeletal disorder Musculoskeletal pain  
Musculoskeletal stiffness Myalgia Myasthenic syndrome  
Mydriasis Myelitis Myocardial infarction Myocardial  
ischaemia Myocarditis Myoclonus Myopathy Myopia Myositis  
Nail disorder Nail infection Narcolepsy Nasal congestion  
Nasal disorder Nasal dryness Nasal oedema Nasal  
polyps Nasopharyngitis Nausea Neck pain Necrosis  
Necrosis ischaemic Neoplasm malignant Neoplasm prostate  
Neoplasm recurrence Neoplasm skin Nephritis  
Nephrolithiasis Nephrotic syndrome Nerve root lesion  
Nervous system disorder Nervousness Neuralgia Neuritis  
Neurodermatitis Neurogenic bladder Neuroleptic malignant  
syndrome Neurological symptom Neuroma Neuropathy peripheral  
Neurosis Neutropenia Neutrophil count decreased Neutrophil  
count increased Night sweats Nightmare Nocturia Nodal  
arrhythmia Nodule Normochromic normocytic anaemia Nuchal  
rigidity Nystagmus Obesity Obsessive thoughts Obstruction  
Obstructive airways disorder Ocular hyperaemia Oculogyric crisis  
Oedema Oedema peripheral Oesophageal carcinoma Oesophageal  
disorder Oesophageal spasm Oesophageal stenosis Oesophageal ulcer  
Oesophagitis Oligomenorrhoea Oliguria Onychomycosis  
Opisthotonus Optic atrophy Optic neuritis Oral  
candidiasis Oral neoplasm benign Oral pain Orchitis noninfective  
Oropharyngeal discomfort Oropharyngeal pain  
Oropharyngeal spasm Orthostatic hypotension  
Osteoarthritis Osteoarthropathy Osteodystrophy  
Osteomyelitis Osteonecrosis Osteopenia Osteoporosis  
Otitis externa Otitis media Otitis media acute  
Otitis media chronic Ovarian cancer Ovarian cyst Pain  
Pain in extremity Pain in jaw Pallor Palpitations  
Pancreatitis acute Pancytopenia Panic attack Panic  
disorder Panic disorder with agoraphobia Panic reaction  
Papilloma Papule Paraesthesia oral Paralysis Paranoia  
Parasomnia Paresis Parkinsonian gait Parkinsonism  
Paronychia Parosmia Parotitis Pathological fracture  
Pathological gambling Pelvic pain Penis disorder Peptic  
ulcer Pericardial effusion Pericarditis constrictive Perineal  
pain Periodontitis Periorbital oedema Peripheral coldness  
Peripheral ischaemia Peripheral vascular disorder Peritoneal  
adhesions Personality change Personality disorder Petechiae  
Pharyngeal disorder Pharyngeal erythema Pharyngitis

Phlebitis Phlebitis superficial Phobia Phonological  
 disorder Photophobia Photopsia Photosensitivity allergic reaction  
 Photosensitivity reaction Pigmentation disorder Pituitary  
 tumour benign Plasmacytoma Platelet count decreased  
 Pleural disorder Pleural effusion Pleural fibrosis Pleurisy  
 Pneumonia Pneumonia aspiration Pneumothorax Poisoning  
 Poliomyelitis Pollakiuria Polyarteritis nodosa  
 Polycythaemia Polydipsia Polymyalgia rheumatica Polyp  
 Polyuria Post procedural infection Postmenopausal  
 haemorrhage Postural orthostatic tachycardia syndrome Posture  
 abnormal Pre-eclampsia Precocious puberty Premature  
 ejaculation Premenstrual syndrome Presyncope Priapism Procedural  
 nausea Proctalgia Productive cough Prolactinoma Prostate  
 cancer Prostatic adenoma Prostatic disorder Prostatitis  
 Protein urine present Proteinuria Protrusion tongue Prurigo  
 Pruritus Pruritus generalised Pruritus genital  
 Pseudolymphoma Psoriasis Psychiatric symptom Psychomotor  
 retardation Psychotic disorder Puberty Pulmonary congestion  
 Pulmonary embolism Pulmonary fibrosis Pulmonary  
 function test decreased Pulmonary hypertension Pulmonary oedema  
 Pulse absent Punctate keratitis Purpura  
 Pyelonephritis Pyoderma Pyuria Rales Rash erythematous  
 Rash generalised Rash macular Rash maculo-papular Rash  
 papular Rash pustular Rash vesicular Raynaud's phenomenon  
 Rectal cancer Rectal haemorrhage Rectal tenesmus Red  
 blood cell count decreased Red blood cell sedimentation rate  
 increased Reflux oesophagitis Regressive behaviour  
 Regurgitation Renal artery stenosis Renal colic Renal cyst  
 Renal failure acute Renal impairment Renal neoplasm Renal  
 pain Respiratory acidosis Respiratory alkalosis Respiratory  
 arrest Respiratory depression Respiratory disorder Respiratory  
 distress Respiratory failure Respiratory tract congestion  
 Respiratory tract infection Respiratory tract infection viral  
 Restless legs syndrome Retching Retinal artery occlusion  
 Retinal detachment Retinal disorder Retinal haemorrhage  
 Retinal vascular disorder Retinitis pigmentosa Retrograde  
 ejaculation Retroperitoneal fibrosis Rhabdomyolysis Rheumatoid  
 arthritis Rhinitis Rhinitis allergic Rhinitis seasonal Rhinorrhoea  
 Rhonchi Rosacea Rotator cuff syndrome Sacroiliitis  
 Saliva altered Salivary duct obstruction Salivary gland  
 disorder Salivary gland enlargement Salivary gland pain  
 Salivary hypersecretion Salpingitis Sarcoidosis Sarcoma  
 Scab Schizoaffective disorder Schizophrenia  
 Schizophreniform disorder Sciatica Scotoma Seasonal  
 allergy Seborrhoeic dermatitis Seborrhoeic keratosis Sedation  
 Sensation of foreign body Sensation of heaviness  
 Sensitisation Sensory disturbance Sensory loss  
 Sepsis Septic shock Severe acute respiratory syndrome  
 Sexual dysfunction Shock Sialoadenitis Sicca syndrome  
 Sick sinus syndrome Sinus arrhythmia Sinus bradycardia Sinus  
 congestion Sinus disorder Sinus headache Sinus tachycardia  
 Sinusitis Skin burning sensation Skin cancer Skin  
 discolouration Skin disorder Skin exfoliation Skin  
 hyperpigmentation Skin hypertrophy Skin infection Skin irritation  
 Skin lesion Skin mass Skin odour abnormal Skin papilloma

Skin ulcer Sleep apnoea syndrome Sleep attacks Sleep  
 disorder Sleep paralysis Sleep talking Sleep terror  
 Sluggishness Small intestinal obstruction Sneezing  
 Snoring Social avoidant behaviour Somnambulism  
 Somnolence Speech disorder Spinal osteoarthritis Spine  
 malformation Splenomegaly Spondylitis Squamous cell  
 carcinoma Status epilepticus Stevens-Johnson syndrome  
 Sticky skin Stomatitis Stress Stridor Stupor  
 Subarachnoid haemorrhage Subcutaneous abscess  
 Subcutaneous nodule Subdural haematoma Sudden death  
 Suicidal ideation Suicide attempt Superior sagittal sinus  
 thrombosis Supraventricular extrasystoles Supraventricular  
 tachycardia Surgery Suspiciousness Swelling Swelling face  
 Swollen tongue Syncope Synostosis Synovitis Systemic  
 lupus erythematosus Tachycardia Tachypnoea Tardive dyskinesia  
 Tearfulness Tenderness Tendonitis Tenosynovitis Tension  
 Tension headache Terminal insomnia Testicular disorder  
 Testicular pain Testicular swelling Tetany Therapeutic  
 response decreased Therapeutic response increased Thinking  
 abnormal Thirst Thought blocking Throat irritation Throat  
 tightness Thrombocytopenia Thrombocytopenic purpura  
 Thrombocytosis Thrombophlebitis Thrombosis Thrombotic  
 thrombocytopenic purpura Thyroid adenoma Thyroid cancer  
 Thyroid neoplasm Thyroiditis Tic Tinnitus Tongue  
 discolouration Tongue disorder Tongue dry Tongue oedema  
 Tongue paralysis Tongue spasm Tongue ulceration Tonsillar  
 hypertrophy Tonsillitis Tooth abscess Tooth disorder Tooth  
 impacted Tooth infection Toothache Torsade de pointes  
 Torticollis Toxic epidermal necrolysis Tracheobronchitis  
 Transaminases increased Transient ischaemic attack  
 Tremor Trismus Tuberculin test positive  
 Tubulointerstitial nephritis Ulcer Ulcer haemorrhage Umbilical  
 hernia Unevaluable event Unintended pregnancy Unresponsive to  
 stimuli Upper airway obstruction Upper respiratory tract  
 infection Upper-airway cough syndrome Urethral disorder Urethral  
 pain Urethritis Urinary hesitation Urinary incontinence  
 Urinary retention Urinary tract disorder Urinary tract  
 infection Urine abnormality Urine analysis abnormal Urine  
 output increased Urosepsis Urticaria Uterine disorder Uterine  
 haemorrhage Uterine leiomyoma Uterine neoplasm Uterovaginal prolapse  
 VIIth nerve paralysis Vaginal discharge Vaginal haemorrhage  
 Vaginal infection Vaginal inflammation Varicose vein  
 Vascular purpura Vasculitis Vasoconstriction Vasodilation  
 procedure Vasospasm Vein disorder Vein pain Venous thrombosis  
 Ventricular extrasystoles Ventricular failure Ventricular  
 fibrillation Ventricular hypertrophy Ventricular  
 tachycardia Vertigo Vestibular ataxia Vestibular disorder Viral  
 diarrhoea Viral infection Vision blurred Visual acuity reduced  
 Visual impairment Vitamin B12 deficiency Vitreous detachment  
 Vitreous disorder Vitreous floaters Vocal cord paralysis  
 Vomiting Vulvovaginal candidiasis Vulvovaginal dryness  
 Vulvovaginal mycotic infection Vulvovaginal pruritus  
 Vulvovaginitis Water intoxication Weight decreased  
 Weight fluctuation Weight increased Wheezing White blood  
 cell count decreased White blood cell count increased White blood

cells urine positive Withdrawal bleed Withdrawal hypertension  
Withdrawal syndrome Wound infection Xerophthalmia  
Xerosis Yawning

\*\*\*\*\*  
\*\*\*\*\*

Outer membrane protein tolC - Group: Transporter

Treated with:

cobalt hexammine ion: experimental small molecule (0  
associated side effects)

known side effects mediated through drugs targeting this protein:

\*\*\*\*\*  
\*\*\*\*\*

Neuronal acetylcholine receptor subunit alpha-4 - Group: Channel

Treated with:

nicotine: approved small molecule (98 associated side effects)

For the relief of nicotine withdrawal symptoms and as an aid  
to smoking cessation.

butabarbital: illicit,approved small molecule (0 associated  
side effects) For short-term treatment of insomnia and anxiety  
disorders

butalbital:illicit,approved small molecule (0 associated side  
effects) Used in combination with acetaminophen or aspirin and  
caffeine for its sedative and relaxant effects in the treatment of  
tension headaches, migraines, and pain.

talbutal: illicit,approved small molecule (0 associated side  
effects) For use as a sedative and hypnotic.

pentobarbital: approved small molecule (38 associated side  
effects) For the short-term treatment of insomnia.

secobarbital: approved small molecule (38 associated side  
effects) For the Short-term treatment of intractable insomnia for  
patients habituated to barbiturates

metharbital: approved small molecule (0 associated side  
effects) Metharbital is used for the treatment of epilepsy.

thiopental:approved small molecule (0 associated side effects)

For use as the sole anesthetic agent for brief (15 minute)  
procedures, for induction of anesthesia prior to administration of  
other anesthetic agents, to supplement regional anesthesia, to  
provide hypnosis during balanced anesthesia with other agents for  
analgesia or muscle relaxation, for the control of convulsive states  
during or following inhalation anesthesia or local anesthesia, in  
neurosurgical patients with increased intracranial pressure, and for  
narcoanalysis and narcosynthesis in psychiatric disorders.

galantamine: approved small molecule (160 associated side  
effects) For the treatment of mild to moderate dementia of the  
Alzheimer's type. Has also been investigated in patients with mild  
cognitive impairment who did not meet the diagnostic criteria for  
Alzheimer's disease.

primidone: approved small molecule (16 associated side effects)

For the treatment of epilepsy

methylphenobarbital: approved small molecule (37 associated  
side effects) For the relief of anxiety, tension, and  
apprehension, also used as an anticonvulsant for the treatment of  
epilepsy.

varenicline: approved small molecule (285 associated side effects) For use as an aid in smoking cessation.  
 amobarbital: illicit,approved small molecule (0 associated side effects)  
 aprobarbital: illicit,approved small molecule (0 associated side effects)  
 butethal: illicit,approved small molecule (0 associated side effects) For the treatment of insomnia.  
 heptabarbital: approved small molecule (0 associated side effects) Used mainly for sedation and hypnosis.  
 hexobarbital: approved small molecule (0 associated side effects) For the induction of anesthesia prior to the use of other general anesthetic agents and for induction of anesthesia for short surgical, diagnostic, or therapeutic procedures associated with minimal painful stimuli.  
 barbituric acid derivative: illicit,experimental small molecule (0 associated side effects)

392 known side effects mediated through drugs targeting this protein:

Abdominal discomfort Abdominal pain Abnormal dreams Abnormal faeces Acne Acute coronary syndrome Affect lability Aggression Agitation Agranulocytosis Amnesia Anaemia Anaemia megaloblastic Anger Angina pectoris Angioedema Angiopathy Anxiety Aortic dissectionApathy Aphasia Aphthous stomatitis Aplasia Apnoea Apraxia Arrhythmia Arrhythmia supraventricular Arterial disorder Arthralgia Arthritis Asthenia Asthma Ataxia Atrial fibrillation Atrioventricular block Back pain Balance disorder Bladder disorder Bladder pain Blindness Blindness transient Blister Blood alkaline phosphatase increased Blood pressure increased Blood urea increased Body temperature increased Bone pain BradycardiaBradyphrenia Breast disorder Bronchitis Bronchospasm Bundle branch block Cardiac disorder Cardiac failure Cardiac fibrillation Cardiac flutter Cardiovascular disorder Cataract Cataract subcapsular Cerebrovascular accident Cerebrovascular disorder Change of bowel habit Chest discomfort Chest pain Chills Chronic obstructive pulmonary disease Circadian rhythm sleep disorder Coagulopathy Completed suicideConfusional stateConjunctivitis Connective tissue disorder Constipation Convulsion Coordination abnormal Cor pulmonale Coronary artery disease Costochondritis Cough Cystitis Cystitis noninfective Cytolytic hepatitis Deafness Death Decreased appetite DehydrationDelirium Delusion Dependence Depressed level of consciousness Depressed mood Depression Dermatitis Dermatitis bullous Dermatitis exfoliative Diabetes mellitusDiarrhoea Diplopia Discomfort Disorientation Dissociation Disturbance in attention Disturbance in sexual arousal Diverticulitis Dizziness Drug abuse Drug dependence Drug hypersensitivity Dry eye Dry mouth Dry skin Dysarthria Dysgeusia Dysmenorrhoea Dyspepsia Dysphagia Dysphonia Dysphoria Dyspnoea Ear pain Eczema Electrocardiogram QT prolonged Electrocardiogram ST segment Electrocardiogram ST segment



depression Electrocardiogram T wave amplitude decreased  
Electrocardiogram T wave inversion Electrocardiogram abnormal  
Embolism Emotional disorder Endocrine disorder  
Enterocolitis Epistaxis Erectile dysfunction Eructation  
Erythema Erythema multiforme Euphoric mood  
Extrasystoles Eye disorder Eye irritation Eye pain  
Fatigue Feeling abnormal Feeling cold Flat affect  
Flatulence Flushing Frustration Fungal infection Gallbladder  
disorder Gastric disorder Gastric ulcer Gastritis  
Gastroenteritis Gastrointestinal disorder Gastrointestinal  
haemorrhage Gastrointestinal pain Gastrooesophageal reflux disease  
Gingival pain Gingivitis Glycosuria Gravitational oedema  
Haematemesis Haematochezia Haematuria Haemoglobin  
Haemorrhage Hallucination Hangover Headache Hepatic  
enzyme increased Hepatitis Hepatobiliary disease Hepatocellular  
injury Hiccups Homicidal ideation Hormone level abnormal  
Hostility Hot flush Hyperglycaemia Hyperhidrosis  
Hyperkalaemia Hyperkinesia Hyperlipidaemia  
Hypersensitivity Hypersomnia Hypertension Hypertonia  
Hypoaesthesia Hypocalcaemia Hypogeusia Hypoglycaemia  
Hypokalaemia Hypokinesia Hypotension Hypoventilation  
Hypoxia Ill-defined disorder Immune system disorder  
Incontinence Increased appetite Increased bronchial  
secretion Infarction Infection Infestation Influenza Influenza  
like illness Initial insomnia Injection site reaction  
Insomnia Intestinal obstruction Irritability Ischaemia  
Joint stiffness Lacrimation increased Lethargy  
Leukocytosis Libido decreased Libido increased Liver  
disorder Liver function test abnormal Liver injury Loss of  
consciousness Lower gastrointestinal haemorrhage Lung disorder  
Lymphadenopathy Malaise Mania Mediastinal disorder  
Melaena Menopausal symptoms Menorrhagia Menstrual  
disorder Mental disability Mental disorder Mental retardation  
Middle insomnia Migraine Mood swings Mouth ulceration  
Multiple sclerosis Muscle contractions involuntary  
Muscle enzyme increased Muscle spasms Musculoskeletal  
chest pain Musculoskeletal discomfort Musculoskeletal disorder  
Musculoskeletal pain Musculoskeletal stiffness Myalgia  
Mydriasis Myocardial infarction Myocardial ischaemia  
Myopia Myositis Nasal congestion Nasal discomfort Nasal  
ulcer Nasopharyngitis Nausea Nephrolithiasis Nervous system  
disorder Nervousness Neuropathy peripheral Night blindness Night  
sweats Nightmare Nocturia Nystagmus Obstruction Obstructive  
airways disorder Ocular vascular disorder Oedema Oedema  
peripheral Oesophageal disorder Oesophageal perforation  
Oesophagitis Oropharyngeal pain Orthostatic  
hypotension Osteoarthritis Osteomalacia Osteoporosis Pain  
Pain in extremity Pain in jaw Palpitations Pancreatitis  
acute Panic reaction Paraesthesia Paralysis Paranoia  
Parosmia Peripheral ischaemia Peripheral vascular disorder  
Pharyngitis Phobia Photophobia Photosensitivity reaction  
Platelet count decreased Pleurisy Pneumonia Pollakiuria  
Polydipsia Polyuria Pruritus Psoriasis Psychomotor  
skills impaired Psychotic disorder Pulmonary embolism  
Pulmonary function test decreased Purpura Rash Rash

generalised Rectal haemorrhage      Renal failure      Renal failure  
 acute Respiratory depression      Respiratory disorder      Respiratory  
 failure      Respiratory tract infection      Restless legs syndrome  
          Rhinitis      Rhinorrhoea      Salivary hypersecretion      Scotoma  
          Semen analysis abnormal      Sensory disturbance      Sensory  
 loss Sexual dysfunction      Shock      Sinus congestion      Sinusitis      Sleep  
 disorder      Sneezing      Snoring      Somnolence      Splenomegaly  
          Sputum increased      Stomatitis      Suicidal ideation      Suicide attempt  
          Supraventricular tachycardia      Swelling      Syncope      Tachycardia  
          Tenderness      Tension      Terminal insomnia      Thinking abnormal  
          Thirst      Throat irritation      Thrombocytopenia      Thrombocytosis  
          Thrombosis      Thyroid disorder      Tinnitus      Tobacco user  
          Tongue coated      Tooth disorder      Toxic epidermal necrolysis  
          Transient ischaemic attack      Tremor      Ulcer      Upper respiratory  
 tract infection      Upper-airway cough syndrome      Urethral disorder  
          Urethral syndrome      Urinary incontinence      Urinary retention  
          Urinary tract disorder      Urinary tract infection      Urine  
 abnormality      Urine analysis abnormal      Urine output increased  
          Urticaria      VIIIth nerve paralysis      Vaginal discharge      Vascular  
 dementia      Vascular purpura      Ventricular extrasystoles      Ventricular  
 tachycardia      Vertigo      Viral infection      Vision blurred      Visual  
 acuity reduced      Visual impairment      Vitreous floaters      Vomiting  
          Weight decreased      Weight increased      Withdrawal syndrome

\*\*\*\*\*  
 \*\*\*\*\*

Transient receptor potential cation channel subfamily V member 3 -  
 Group: Channel

Treated with:

menthol: approved      small molecule      (0 associated side effects)  
          Used to treat occasional minor irritation, pain, sore mouth,  
 and sore throat as well as cough associated with a cold or inhaled  
 irritants.

known side effects mediated through drugs targeting this protein:

\*\*\*\*\*  
 \*\*\*\*\*

Cystine/glutamate transporter - Group: Transporter

Treated with:

l-cystine: approved, nutraceutical small molecule      (0 associated  
 side effects)      It has been claimed that L-cysteine has anti-  
 inflammatory properties, that it can protect against various toxins,  
 and that it might be helpful in osteoarthritis and rheumatoid  
 arthritis. More research will have to be done before L-cysteine can  
 be indicated for any of these conditions. Research to date has  
 mostly been in animal models.

l-glutamic acid: approved, nutraceutical small molecule      (0  
 associated side effects)      Considered to be nature's "Brain food"  
 by improving mental capacities; helps speed the healing of ulcers;  
 gives a "lift" from fatigue; helps control alcoholism, schizophrenia  
 and the craving for sugar.

riluzole: approved      small molecule      (437 associated side  
 effects)      For the treatment of amyotrophic lateral sclerosis (ALS,  
 Lou Gehrig's Disease)

sulfasalazine: approved small molecule (114 associated side effects) For the treatment of Crohn's disease and rheumatoid arthritis as a second-line agent.

485 known side effects mediated through drugs targeting this protein:

Abdominal discomfort Abdominal distension Abdominal pain lower  
Abdominal pain upper Abnormal dreams Abscess Acidosis  
Acute coronary syndrome Acute interstitial pneumonitis  
Adverse reaction Affect lability Ageusia Agitation  
Agranulocytosis Alanine aminotransferase increased Alopecia  
Altered state of consciousness Alveolitis allergic  
Alveolitis fibrosing Amblyopia Amenorrhoea Amnesia  
Anaemia Anaemia megaloblastic Anaphylactic shock  
Anaphylactoid reaction Angina pectoris Angioedema Angiopathy  
Anorectal discomfort Anuria Anxiety Aortic dissection  
Apathy Aplastic anaemia Apnoea Arterial occlusive  
disease Arthralgia Arthritis Arthropathy Aspiration Asthenia  
Asthma Ataxia Atrial fibrillation Azoospermia  
Azotaemia Back pain Biliary colic Blepharitis Blindness  
Blood alkaline phosphatase increased Blood bilirubin  
abnormal Blood creatinine increased Blood disorder Blood  
lactate dehydrogenase increased Blood potassium decreased Blood  
pressure increased Body temperature decreased Body temperature  
increased Bone neoplasm Bradycardia Breast abscess Breast  
disorder Breast pain Bronchitis Bundle branch block Candidiasis  
Cardiac arrest Cardiac disorder Cardiac failure Cardiac  
failure congestive Cardiac fibrillation Cardiac murmur  
Cardiomyopathy Cataract Cauda equina syndrome Cellulitis  
Cerebral artery embolism Cerebral haematoma Cerebral  
haemorrhage Cerebral ischaemia Cheilitis Chest pain Chills  
Choking Cholecystitis Cholestasis Chromaturia Coma  
Completed suicide Condition aggravated Confusional state  
Congenital anomaly Congenital central nervous system  
anomaly Congenital foot malformation Congestive cardiomyopathy  
Connective tissue disorder Constipation Convulsion  
Coombs direct test positive Coordination abnormal Cor  
pulmonale Cough Crystal urine Crystalluria Cyanosis Cyst  
Cytolytic hepatitis Deafness Decreased appetite  
Deficiency anaemia Dehydration Delirium Delusion  
Dementia Dental caries Depersonalisation Depressed level  
of consciousness Depression Dermatitis contact Dermatitis  
exfoliative Developmental delay Diabetes insipidus Diabetes  
mellitus Diabetic ketoacidosis Diarrhoea Diarrhoea haemorrhagic  
Diplopia Discomfort Disease progression Disseminated  
intravascular coagulation Disturbance in attention Disturbance  
in sexual arousal Dizziness Drug eruption Drug interaction Drug  
level increased Dry mouth Dysarthria Dysgeusia Dyspepsia  
Dysphagia Dysplasia Dyspnoea Dystonia Dysuria Ear  
pain Ecchymosis Eczema Effusion Embolism Encephalopathy  
Endocrine disorder Endophthalmitis Enterocolitis  
Eosinophilia Eosinophilic myocarditis Eosinophilic  
pneumonia Epistaxis Erectile dysfunction Erythema multiforme  
Euphoric mood Exomphalos Extrapyrarnidal disorder  
Extrasystoles Eye disorder Face oedema Faecal

incontinence      Faecalith      Faecaloma      Fatigue      Feeling abnormal  
     Flat affect      Flatulence      Fluid retention      Flushing      Fungal skin  
 infection      Furuncle      Gait disturbance      Gamma-glutamyltransferase  
 increased      Gastric cancer      Gastric disorder      Gastritis  
     Gastrointestinal disorder      Gastrointestinal dysplasia  
     Gastrointestinal haemorrhage      Gastrointestinal pain      Generalised  
 oedema      Gingival bleeding      Glaucoma      Glossitis      Goitre      Gout  
     Granuloma skin      Haematemesis      Haematoma      Haematuria  
     Haemoglobin      Haemolytic anaemia      Haemoptysis      Haemorrhage  
     Hallucination      Headache      Hearing impaired      Hemiplegia  
     Hepatic cirrhosis      Hepatic failure      Hepatic function abnormal  
     Hepatic necrosis      Hepatitis B      Hepatitis cholestatic      Hepatitis  
 fulminant      Hepatobiliary disease      Hepatocellular injury      Hereditary  
 disorder      Hernia      Herpes virus infection      Herpes zoster  
     Hiccups      Hormone level abnormal      Hostility      Hyperacusis  
     Hyperamylasaemia      Hypercalcaemia      Hypercholesterolaemia  
     Hyperhidrosis      Hyperlipidaemia      Hypersensitivity  
     Hypertension      Hypertonia      Hyperventilation      Hypoaesthesia  
 oral      Hypochromic anaemia      Hypoglycaemia      Hypokalaemia  
     Hypokinesia      Hyponatraemia      Hypoproteinaemia      Hypotension  
     Hypothermia      Hypotonia      Hypoventilation      Hypoxia      Idiopathic  
 pulmonary fibrosis      Ileus      Ill-defined disorder      Immune system  
 disorder      Incontinence      Increased appetite      Infantile genetic  
 agranulocytosis      Infarction      Infection      Infestation      Inflammation  
     Influenza like illness      Injection site reaction      Insomnia  
     Interstitial lung disease      Intestinal functional disorder  
     Intestinal obstruction      Intracranial pressure increased      Iron  
 deficiency      Iron deficiency anaemia      Ischaemia      Jaundice  
     Jaundice cholestatic      Ketoacidosis      Lactic acidosis  
     Laryngitis      Leiomyoma      Lethargy      Leukocytosis      Leukopenia  
     Libido decreased      Libido increased      Liver function test abnormal  
     Liver injury      Lobar pneumonia      Loss of consciousness      Lung  
 disorder      Lung neoplasm malignant      Lymphadenopathy      Lymphoma  
     Lymphopenia      Major depression      Malaise      Mania      Mediastinal  
 disorder      Melaena      Meningitis      Mental disability      Mental disorder  
     Mesenteric occlusion      Methaemoglobinaemia      Metrorrhagia  
     Micturition urgency      Migraine      Mood swings      Mouth ulceration  
     Muscle atrophy      Muscle relaxant therapy      Muscle rigidity  
     Muscle spasms      Muscular weakness      Musculoskeletal discomfort  
     Musculoskeletal pain      Myalgia      Myasthenia gravis      Myelitis  
     Myelitis transverse      Myelodysplastic syndrome      Myocardial  
 infarction      Myocardial ischaemia      Myocarditis      Myoclonus      Nasal  
 congestion      Nausea      Necrosis      Neoplasm      Neoplasm malignant  
     Nephritis      Nephrolithiasis      Nephrotic syndrome      Nerve root  
 lesion      Nervous system disorder      Neuralgia      Neuritis  
     Neuropathy peripheral      Neutropenia      Neutropenic colitis  
     Nocturia      Nodule      Normochromic normocytic anaemia  
     Obstruction      Oedema peripheral      Oesophageal disorder      Oesophageal  
 stenosis      Oesophagitis      Oliguria      Oral candidiasis      Orthostatic  
 hypotension      Osteoarthritis      Osteonecrosis      Osteoporosis      Pain  
     Pain in extremity      Palpitations      Pancreatitis acute  
     Pancytopenia      Panophthalmitis      Paraesthesia oral      Paralysis  
     Paranoia      Parapsoriasis      Parathyroid disorder      Pemphigoid  
     Pericarditis      Periorbital oedema      Peripheral vascular  
 disorder      Peritonitis      Personality disorder      Petechiae      Phlebitis

Phobia            Photophobia    Photosensitivity reaction    Pityriasis  
 lichenoides et varioliformis acuta    Platelet count decreased  
 Pleural disorder    Pleural effusion    Pleurisy    Pneumonia  
 Pneumothorax            Pollakiuria    Polyarteritis nodosa    Polyp  
 Polyuria    Postmenopausal haemorrhage    Priapism    Proctalgia  
 Proctitis    Prostate cancer    Prostatic disorder    Protein  
 urine present    Proteinuria    Prothrombin time shortened    Pruritus  
 Pseudomembranous colitis    Psoriasis    Psychiatric symptom  
 Psychotic disorder    Pulmonary embolism    Pulmonary  
 function test decreased    Pulmonary oedema    Pulmonary toxicity  
 Purpura    Pyelonephritis    Radial nerve palsy  
 Radiculopathy    Rash    Rectal tenesmus    Red blood cell count  
 decreased    Renal failure acute    Renal impairment    Renal pain  
 Respiratory acidosis    Respiratory depression    Respiratory  
 disorder    Respiratory distress    Respiratory failure    Respiratory  
 moniliasis    Rhabdomyolysis    Rheumatoid arthritis    Rhinitis  
 Schizophreniform disorder    Scleral hyperaemia    Seborrhoeic  
 dermatitis    Sedation    Sensory disturbance    Sepsis    Serum  
 sickness    Shock    Sinusitis    Skin candida    Skin discolouration  
 Skin disorder    Skin exfoliation    Skin mass    Skin ulcer  
 Somnolence    Stomatitis    Stridor    Stupor    Subarachnoid  
 haemorrhage    Subdural haematoma    Sudden death    Suicide attempt  
 Supraventricular tachycardia    Syncope    Systemic lupus  
 erythematosus    Tachycardia    Talipes    Tetany    Thinking abnormal  
 Thirst    Thrombocytopenia    Thrombocytopenic purpura  
 Thrombosis    Thyroid neoplasm    Tinnitus    Tongue discolouration  
 Tooth disorder    Tooth impacted    Toxic epidermal necrolysis  
 Tremor    Trismus    Ulcer    Urethral disorder    Urinary  
 incontinence    Urinary retention    Urinary tract disorder    Urinary  
 tract infection    Urine abnormality    Urine analysis abnormal    Urine  
 colour abnormal    Urticaria    Uterine haemorrhage    Uterine leiomyoma  
 VIIth nerve paralysis    Vascular purpura    Vasculitis    Ventricular  
 extrasystoles    Ventricular fibrillation    Ventricular  
 tachycardia    Vertigo    Vestibular disorder    Vomiting  
 Vulvovaginal candidiasis    Vulvovaginal mycotic infection  
 Weight decreased    Weight increased    White blood cell count  
 decreased    White blood cell count increased    Yawning

\*\*\*\*\*  
 \*\*\*\*\*

Glutamate receptor, ionotropic kainate 5 - Group: Channel

Treated with:

l-glutamic acid: approved, nutraceutical small molecule (0  
 associated side effects)    Considered to be nature's "Brain food"  
 by improving mental capacities; helps speed the healing of ulcers;  
 gives a "lift" from fatigue; helps control alcoholism, schizophrenia  
 and the craving for sugar.

known side effects mediated through drugs targeting this protein:

\*\*\*\*\*  
 \*\*\*\*\*

Interferon-alpha/beta receptor beta chain - Group: Receptor

Treated with:

peginterferon alfa-2a: approved biotech (0 associated side effects) For treatment of hairy cell leukemia, malignant melanoma, and AIDS-related Kaposi's sarcoma.

interferon alfa-n1: approved biotech (0 associated side effects) For treatment of venereal or genital warts caused by the Human Papiloma Virus

interferon alfa-n3: approved biotech (0 associated side effects) For the intralesional treatment of refractory or recurring external condylomata acuminata.

peginterferon alfa-2b: approved biotech (0 associated side effects) For the treatment of chronic hepatitis C in patients not previously treated with interferon alpha who have compensated liver disease and are at least 18 years of age.

interferon alfa-2a, recombinant: approved biotech (0 associated side effects) For the treatment of chronic hepatitis C, hairy cell leukemia, AIDS-related Kaposi's sarcoma, and chronic myelogenous leukemia. Also for the treatment of oral warts arising from HIV infection.

interferon beta-1a: approved biotech (0 associated side effects) For treatment of relapsing/remitting multiple sclerosis, also for condyloma acuminatum

interferon beta-1b: approved biotech (0 associated side effects) Interferon beta-1b is a drug used for the treatment of relapsing/remitting multiple sclerosis. It has been shown to slow the advance of the disease as well as to decrease the frequency of attacks.

interferon alfacon-1: approved biotech (0 associated side effects) For the treatment of hairy cell leukemia, malignant melanoma, and AIDS-related Kaposi's sarcoma

interferon alfa-2b, recombinant: approved biotech (0 associated side effects) For the treatment of hairy cell leukemia, malignant melanoma, and AIDS-related Kaposi's sarcoma.

known side effects mediated through drugs targeting this protein:

\*\*\*\*\*  
\*\*\*\*\*

Orphan nuclear receptor PXR - Group: Receptor

Treated with:

vitamin e: approved, nutraceutical small molecule (0 associated side effects) Vitamin E, known for its antioxidant activities, is protective against cardiovascular disease and some forms of cancer and has also demonstrated immune-enhancing effects. It may be of limited benefit in some with asthma and rheumatoid arthritis. It may be helpful in some neurological diseases including Alzheimer's, some eye disorders including cataracts, and diabetes and premenstrual syndrome. It may also help protect skin from ultraviolet irradiation although claims that it reverses skin aging, enhances male fertility and exercise performance are poorly supported. It may help relieve some muscle cramps.

erlotinib: approved small molecule (118 associated side effects) For the treatment of patients with locally advanced or metastatic non-small cell lung cancer after failure of at least one prior chemotherapy regimen. Also for use, in combination with

gemcitabine, as the first-line treatment of patients with locally advanced, unresectable or metastatic pancreatic cancer.

estradiol: approved small molecule (315 associated side effects) For the treatment of urogenital symptoms associated with post-menopausal atrophy of the vagina (such as dryness, burning, pruritus and dyspareunia) and/or the lower urinary tract (urinary urgency and dysuria).

ethinyl estradiol: approved small molecule (0 associated side effects) For treatment of moderate to severe vasomotor symptoms associated with the menopause, female hypogonadism, prostatic carcinoma-palliative therapy of advanced disease, breast cancer, as an oral contraceptive, and as emergency contraceptive.

rifampin: approved small molecule (0 associated side effects) For the treatment of Tuberculosis and Tuberculosis-related mycobacterial infections.

rifaximin: approved small molecule (101 associated side effects) For the treatment of patients (>12 years of age) with travelers' diarrhea caused by noninvasive strains of *Escherichia coli*. Rifaximin is also designated an orphan drug by the Food and Drug Administration for the adjunctive treatment of hepatic encephalopathy to reduce blood ammonia concentrations and decrease severity of neurological manifestations.

hyperforin: nutraceutical small molecule (0 associated side effects)

srl2813: experimental small molecule (0 associated side effects)

n-(2,2,2-trifluoroethyl)-n-{4-[2,2,2-trifluoro-1-hydroxy-1-(trifluoromethyl)ethyl]phenyl}benzenesulfonamide: experimental small molecule (0 associated side effects)

411 known side effects mediated through drugs targeting this protein:

Abdominal discomfort Abdominal distension Abdominal pain  
 Abdominal pain upper Abnormal dreams Abscess Acne Acute  
 coronary syndrome Acute respiratory distress syndrome Affect  
 lability Ageusia Agitation Alanine aminotransferase increased  
 Alopecia Amenorrhoea Amnesia Anaemia Anal pruritus  
 Anaphylactic shock Anaphylactoid reaction Angioedema  
 Angiopathy Anorectal discomfort Anxiety Aortic dissection  
 Application site reaction Arrhythmia Arthralgia Arthritis  
 Arthropathy Artificial menopause Aspartate aminotransferase  
 increased Asthenia Asthma Back pain Bacterial infection  
 Basal cell carcinoma Benign neoplasm Benign vaginal  
 neoplasm Bladder disorder Bladder pain Blepharitis Blindness  
 Blood alkaline phosphatase increased Blood cholesterol  
 increased Blood glucose decreased Blood glucose increased  
 Blood pressure increased Blood triglycerides increased  
 Blood urine Blood urine present Body temperature increased  
 Bone disorder Bone pain Breast cancer in situ Breast  
 cancer stage IV Breast discharge Breast discomfort Breast disorder  
 Breast engorgement Breast enlargement Breast feeding  
 Breast malformation Breast mass Breast neoplasm Breast pain  
 Breast swelling Breast tenderness Bronchiolitis Bronchitis  
 Bronchospasm Candidiasis Carbohydrate tolerance decreased  
 Carpal tunnel syndrome Cerebral haemorrhage Cerebrovascular

accident Cerebrovascular disorder Cervix carcinoma Chest pain  
 Chills Chloasma Cholecystitis Cholelithiasis  
 Choluria Chorea Cold sweat Colitis Colorectal cancer  
 Conjunctivitis Connective tissue disorder Constipation  
 Contact lens intolerance Convulsion Coronary artery  
 thrombosis Cough Cystitis Cystitis noninfective Decreased  
 appetite Deep vein thrombosis Defaecation urgency Dehydration  
 Depression Dermatitis Dermatitis atopic Dermatitis contact  
 Dermatitis exfoliative Diarrhoea Discomfort Disease  
 progression Disturbance in sexual arousal Diverticulitis  
 Dizziness Drug interaction Dry skin Dry throat Dysentery  
 Dysmenorrhoea Dyspepsia Dysphagia Dyspnoea Dysuria  
 Ear disorder Ear infection Ear pain Ectropion of  
 cervix Elderly Emotional disorder Endocrine disorder  
 Endometrial disorder Endometriosis Epilepsy Epistaxis  
 Erythema Erythema multiforme Erythema nodosum Eye  
 disorder Eye infection Eyelid oedema Family stress  
 Fatigue Feeling abnormal Fibrocystic breast disease  
 Fibrosis Flatulence Fluid retention Flushing Foetal  
 disorder Foetor hepaticus Fungal infection Galactorrhoea  
 Gallbladder disorder Gastric disorder Gastritis  
 Gastroenteritis Gastrointestinal disorder Gastrointestinal  
 haemorrhage Gastrointestinal pain Gastrooesophageal reflux disease  
 Genital candidiasis Genital discharge Genital disorder  
 female Gingival disorder Glucose tolerance decreased Glucose  
 tolerance impaired Goitre Haemangioma Haematemesis  
 Haematochezia Haematoma Haematuria Haemoglobin Haemolytic  
 anaemia Haemorrhage Haemorrhoids Headache Heart rate  
 irregular Hemiparesis Hepatic cancer metastatic Hepatic failure  
 Hepatic function abnormal Hepatitis Hepatobiliary disease  
 Hepatocellular injury Hereditary angioedema Hernia  
 Herpes simplex Herpes virus infection Herpes zoster  
 Hirsutism Hormone level abnormal Hot flush Hyperaemia  
 Hyperaesthesia Hypercalcaemia Hyperglycaemia  
 Hyperhidrosis Hypernatraemia Hypersensitivity Hypertonia  
 Hypertriglyceridaemia Hypertrophy Hypoaesthesia  
 Hypocalcaemia Hypokalaemia Ileus Ill-defined disorder  
 Immune system disorder Incontinence Increased appetite  
 Infarction Infection Infestation Inflammation Influenza  
 Influenza like illness Inguinal hernia Insomnia  
 Interstitial lung disease Intestinal obstruction  
 Irritability Ischaemia Ischaemic stroke Jaundice  
 Jaundice cholestatic Keratitis Keratoconjunctivitis sicca  
 Laryngitis Leiomyoma Lens disorder Libido decreased  
 Libido increased Lip dry Liver disorder Liver function  
 test abnormal Loss of consciousness Lung disorder Lung  
 infection Lung infiltration Lymphadenopathy Lymphocytosis  
 Malaise Mammogram abnormal Mantle cell lymphoma Mass  
 Mediastinal disorder Medical device complication Melaena  
 Menopausal symptoms Menopause Menorrhagia Menstruation  
 irregular Mental disorder Metastases to liver Metastasis  
 Metrorrhagia Microangiopathic haemolytic anaemia  
 Migraine Monocytosis Mood swings Motion sickness Muscle  
 contractions involuntary Muscle rigidity Muscle spasms  
 Musculoskeletal discomfort Musculoskeletal pain



Musculoskeletal stiffness Myalgia Myocardial infarction  
 Nail disorder Nasal congestion Nasopharyngitis Nausea  
 Neck pain Neoplasm Neoplasm malignant Nervous system  
 disorder Nervousness Neuritis Neuropathy peripheral Neutropenia  
 Nipple pain Nuchal rigidity Obliterative bronchiolitis  
 Obstruction Oedema Oedema genital Oedema peripheral  
 Oestrogenic effect Optic neuritis Oropharyngeal pain  
 Osteoarthritis Otitis media Ovarian cancer Ovarian  
 cyst Pain Pain in extremity Palpitations Pancreatic carcinoma  
 Pancreatitis Paraesthesia Paronychia Pathological  
 fracture Pelvic pain Peptic ulcer Peptic ulcer haemorrhage  
 Perineal pain Pharyngitis Pigmentation disorder Pleural  
 disorder Pleural infection Pneumonia Pollakiuria Polyuria  
 Porphyria non-acute Postmenopausal haemorrhage Proctalgia  
 Protein urine present Proteinuria Prurigo Pruritus  
 Pruritus generalised Pruritus genital Pulmonary fibrosis  
 Purpura Rash Rash erythematous Rash pustular Rectal  
 tenesmus Renal cancer Renal failure Renal failure acute  
 Reproductive tract disorder Respiratory disorder Respiratory  
 distress Respiratory tract infection Rhinitis Rhinorrhoea  
 Rosacea Shock Sicca syndrome Sinus congestion Sinus  
 headache Sinusitis Skin disorder Skin exfoliation Skin  
 fissures Skin hyperpigmentation Skin hypertrophy Skin irritation  
 Skin ulcer Somnolence Sticky skin Stomatitis Swelling  
 Swelling face Syncope Tenderness Tension Tension  
 headache Thrombocytopenia Thrombocytosis Thrombophlebitis  
 Thrombophlebitis superficial Thrombosis Tinnitus Tooth  
 abscess Tooth disorder Toothache Toxic shock syndrome Ulcer  
 haemorrhage Ulcerative keratitis Upper respiratory tract infection  
 Urethral disorder Urinary incontinence Urinary tract disorder  
 Urinary tract infection Urine output increased Urticaria  
 Uterine cancer Uterine cervical erosion Uterine  
 enlargement Uterine haemorrhage Uterine leiomyoma Uterine pain  
 Vaginal discharge Vaginal disorder Vaginal haemorrhage  
 Vaginal infection Vaginal neoplasm Vaginal ulceration  
 Vaginismus Varicose vein Vascular purpura Vasodilation  
 procedure Venous thrombosis Vertigo Viral infection Visual  
 acuity reduced Visual impairment Vomiting Vulval disorder  
 Vulvovaginal candidiasis Vulvovaginal discomfort  
 Vulvovaginal mycotic infection Vulvovaginal pain  
 Vulvovaginal pruritus Vulvovaginitis Weight decreased  
 Weight increased Wheezing Withdrawal bleed

\*\*\*\*\*  
 \*\*\*\*\*

Vascular endothelial growth factor receptor 3 - Group: Enzyme

Treated with:

sorafenib: approved small molecule (130 associated side effects) For the treatment of patients with advanced renal cell carcinoma.

sunitinib: approved small molecule (198 associated side effects) For the treatment of advanced renal cell carcinoma as well as the treatment of gastrointestinal stromal tumor after disease progression on or intolerance to imatinib mesylate.

251 known side effects mediated through drugs targeting this protein:

Abdominal discomfort Abdominal pain Abdominal pain upper Acne  
Acute coronary syndrome Adrenal insufficiency Ageusia  
Alanine aminotransferase increased Alopecia Anaemia  
Angioedema Angiopathy Aortic dissection Aphthous stomatitis  
Apoptosis Arrhythmia Arthralgia Ascites Aspartate  
aminotransferase increased Asthenia Back pain Blindness  
Blindness cortical Blister Blood albumin decreased  
Blood alkaline phosphatase increased Blood amylase  
increased Blood bilirubin increased Blood creatinine increased  
Blood glucose decreased Blood glucose increased Blood  
magnesium decreased Blood phosphorus decreased Blood potassium  
decreased Blood potassium increased Blood sodium increased Blood  
thyroid stimulating hormone increased Blood uric acid increased  
Body temperature increased Bradycardia Breast disorder  
Cardiac disorder Cardiac failure Cardiac failure congestive  
Cell death Cerebral haemorrhage Cerebral infarction  
Cerebrovascular accident Chest pain Chills Cholangitis  
Cholecystitis Completed suicide Congenital skin disorder  
Connective tissue disorder Constipation Convulsion Cough  
Decreased appetite Deep vein thrombosis Dehydration  
Depressed mood Dermatitis Dermatitis bullous Dermatitis  
exfoliative Dermatitis psoriasiform Diarrhoea Discomfort  
Dizziness Dry mouth Dry skin Dysgeusia Dyspepsia  
Dysphagia Dysphonia Dyspnoea Eczema Effusion  
Ejection fraction Ejection fraction decreased Electrocardiogram  
PR interval Embolism Embolism venous Endocrine disorder  
Epistaxis Erectile dysfunction Erythema Erythema  
multiforme Eye disorder Fatigue Febrile neutropenia  
Fistula Flank pain Flatulence Flushing Folliculitis  
Gastric haemorrhage Gastritis Gastrointestinal disorder  
Gastrointestinal pain Gastroesophageal reflux disease  
Gingival pain Gingivitis Glossitis Glossodynia  
Gynaecomastia Haematemesis Haematochezia Haematoma  
Haemoglobin decreased Haemoptysis Haemorrhage Haemorrhoids  
Hair colour changes Headache Hepatic failure Hepatic  
function abnormal Hepatic neoplasm malignant Hepatobiliary disease  
Hormone level abnormal Hypercalcaemia Hyperglycaemia  
Hyperkalaemia Hyponatraemia Hypersensitivity  
Hypertension Hypertensive crisis Hyperthyroidism  
Hyperuricaemia Hypoalbuminaemia Hypocalcaemia Hypogeusia  
Hypoglycaemia Hypokalaemia Hyponatraemia  
Hypophosphataemia Hypothyroidism Immune system disorder  
Infarction Infection Infestation Inflammation Influenza  
Influenza like illness Insomnia Ischaemia Jaundice  
Keratoacanthoma Lacrimation increased Left ventricular  
dysfunction Leukoderma Leukoencephalopathy Leukopenia Lipase  
increased Loss of consciousness Lung neoplasm malignant  
Lymphopenia Malaise Mediastinal disorder Melaena  
Mental disorder Metastasis Metastatic renal cell carcinoma  
Metrorrhagia Microangiopathy Mood swings Mouth ulceration  
Mucosal dryness Mucosal inflammation Musculoskeletal  
discomfort Myalgia Myocardial ischaemia Myopathy  
Nasopharyngitis Nausea Necrosis Neoplasm malignant

Nephritis Nephrotic syndrome Nervous system disorder  
 Neuropathy peripheral Neutropenia Oedema Oedema peripheral  
 Oesophageal disorder Oesophagitis Oral pain Pain Pain  
 in extremity Palmar-plantar erythrodysesthesia syndrome  
 Pancreatic disorder Pancreatitis Periorbital oedema  
 Peripheral sensory neuropathy Platelet count decreased  
 Pleural disorder Pleural effusion Posterior reversible  
 encephalopathy syndrome Primary hypothyroidism Protein urine  
 present Proteinuria Prurigo Pruritus Pulmonary embolism  
 Pulmonary haemorrhage Rash Rash erythematous Rash follicular  
 Rash papular Reflux oesophagitis Regressive behaviour  
 Renal failure Renal failure acute Renal impairment  
 Respiratory tract infection Rhabdomyolysis Rhinorrhoea Shock  
 Skin cancer Skin discolouration Skin exfoliation Social  
 avoidant behaviour Splinter haemorrhages Squamous cell  
 carcinoma Stomatitis Syncope Thrombocytopenia Thrombosis  
 Thrombotic microangiopathy Thyroid disorder Thyroiditis  
 Tinnitus Tongue ulceration Transient ischaemic attack  
 Tubulointerstitial nephritis Tumour lysis syndrome Tumour  
 necrosis Tumour pain Ulcer Upper respiratory tract infection  
 Urticaria Varices oesophageal Varicose vein Venous  
 thrombosis Ventricular dysfunction Visual acuity reduced  
 Visual impairment Vomiting Weight decreased Wound haemorrhage  
 Yellow skin

\*\*\*\*\*  
 \*\*\*\*\*

Estrogen receptor beta - Group: Receptor

Treated with:

diethylstilbestrol: approved small molecule (0 associated  
 side effects) Used in the treatment of prostate cancer.  
 Previously used in the prevention of miscarriage or premature  
 delivery in pregnant women prone to miscarriage or premature  
 delivery.

raloxifene: approved small molecule (83 associated side effects)

For the prevention and treatment of osteoporosis in post-  
 menopausal women, as well as prevention and treatment of  
 corticosteroid-induced bone loss. Also for the reduction in the  
 incidence of invasive breast cancer in postmenopausal women with  
 osteoporosis or have a high risk for developing breast cancer.

tamoxifen: approved small molecule (181 associated side effects)

For the treatment of breast cancer.  
 estradiol: approved small molecule (315 associated side effects)  
 For the treatment of urogenital symptoms associated with  
 post-menopausal atrophy of the vagina (such as dryness, burning,  
 pruritus and dyspareunia) and/or the lower urinary tract (urinary  
 urgency and dysuria).

trilostane: approved, withdrawn small molecule (0 associated  
 side effects) Used in the treatment of Cushing's syndrome. It is  
 normally used in short-term treatment until permanent therapy is  
 possible.

estramustine: approved small molecule (71 associated side  
 effects) For the palliative treatment of patients with metastatic  
 and/or progressive carcinoma of the prostate

genistein: experimental small molecule (0 associated side  
 effects)

para-mercury-benzenesulfonic acid:experimental small molecule  
(0 associated side effects)

n-butyl-11-[(7r,8r,9s,13s,14s,17s)-3,17-dihydroxy-13-methyl-  
7,8,9,11,12,13,14,15,16,17-decahydro-6h-cyclopenta[a]phenanthren-7-  
yl]-n-methylundecanamide: experimental small molecule (0  
associated side effects)

5-alpha-androstane-3-beta,17beta-diol: experimental small  
molecule (0 associated side effects)

4-(2-{{4-{{3-(4-chlorophenyl)propyl}sulfanyl}-6-(1-piperazinyl)-  
1,3,5-triazin-2-yl}amino}ethyl)phenol: experimental small  
molecule (0 associated side effects)

estriol: approved small molecule (0 associated side effects)  
Used as a test to determine the general health of an unborn  
fetus.

estropipate: approved small molecule (0 associated side  
effects) Estropipate is used for the treatment of moderate to  
severe vasomotor symptoms associated with the monopause, and  
moderate to severe symptoms of vulval and vaginal atrophy associated  
with the menopause. It is also used to treat hypoestrogenism due to  
hypogonadism, castration or primary ovarian failure, and prevent  
postmenopausal osteoporosis.

2-(3-fluoro-4-hydroxyphenyl)-7-vinyl-1,3-benzoxazol-5-ol:  
experimental small molecule (0 associated side effects)

3-(3-fluoro-4-hydroxyphenyl)-7-hydroxy-1-naphthonitrile:  
experimental small molecule (0 associated side effects)

[5-hydroxy-2-(4-hydroxyphenyl)-1-benzofuran-7-yl]acetonitrile:  
experimental small molecule (0 associated side effects)

4-(6-hydroxy-benzo[d]isoxazol-3-yl)benzene-1,3-diol:  
experimental small molecule (0 associated side effects)

2-(5-hydroxy-naphthalen-1-yl)-1,3-benzooxazol-6-ol: experimental  
small molecule (0 associated side effects)

2-(4-hydroxy-phenyl)benzofuran-5-ol: experimental small  
molecule (0 associated side effects)

(3as,4r,9br)-2,2-difluoro-4-(4-hydroxyphenyl)-6-(methoxymethyl)-  
1,2,3,3a,4,9b-hexahydrocyclopenta[c]chromen-8-ol: experimental  
small molecule (0 associated side effects)

1-chloro-6-(4-hydroxyphenyl)-2-naphthol: experimental small  
molecule (0 associated side effects)

4-(4-hydroxyphenyl)-1-naphthaldehyde oxime: experimental small  
molecule (0 associated side effects)

5-hydroxy-2-(4-hydroxyphenyl)-1-benzofuran-7-carbonitrile:  
experimental small molecule (0 associated side effects)

3-bromo-6-hydroxy-2-(4-hydroxyphenyl)-1h-inden-1-one:  
experimental small molecule (0 associated side effects)

3-(6-hydroxy-naphthalen-2-yl)-benzo[d]isoxazol-6-ol:  
experimental small molecule (0 associated side effects)

(3as,4r,9br)-2,2-difluoro-4-(4-hydroxyphenyl)-1,2,3,3a,4,9b-  
hexahydrocyclopenta[c]chromen-8-ol: experimental small  
molecule (0 associated side effects)

(16alpha,17alpha)-estra-1,3,5(10)-triene-3,16,17-triol:  
experimental small molecule (0 associated side effects)

(9as)-4-bromo-9a-butyl-7-hydroxy-1,2,9,9a-tetrahydro-3h-fluoren-3-  
one: experimental small molecule (0 associated side effects)

(3as,4r,9br)-4-(4-hydroxyphenyl)-1,2,3,3a,4,9b-hexahydrocyclopenta[c]chromen-8-ol: experimental small molecule (0 associated side effects)  
 (3as,4r,9br)-4-(4-hydroxyphenyl)-6-(methoxymethyl)-1,2,3,3a,4,9b-hexahydrocyclopenta[c]chromen-8-ol: experimental small molecule (0 associated side effects)

430 known side effects mediated through drugs targeting this protein:

Abdominal discomfort Abdominal distension Abdominal pain  
 Abdominal pain upper Abscess Acne Acute coronary  
 syndrome Adenocarcinoma Affect lability Agitation Alanine  
 aminotransferase increased Albright's disease Alopecia  
 Amenorrhoea Amnesia Anaemia Anal pruritus  
 Anaphylactic shock Anaphylactoid reaction Angina pectoris  
 Angioedema Angiopathy Anorectal discomfort Anxiety  
 Aortic dissection Application site reaction Arrhythmia  
 Arthralgia Arthritis Arthropathy Artificial menopause  
 Aspartate aminotransferase increased Asthenia Asthma  
 Back pain Bacterial infection Balance disorder Basal cell  
 carcinoma Becker's muscular dystrophy Benign neoplasm Benign  
 vaginal neoplasm Bladder cancer Bladder disorder Bladder pain  
 Blepharitis Blindness Blood alkaline phosphatase increased  
 Blood bilirubin increased Blood cholesterol increased Blood  
 creatinine increased Blood glucose decreased Blood glucose  
 increased Blood pressure increased Blood triglycerides  
 increased Body temperature increased Bone cancer metastatic Bone  
 disorder Bone pain Breast cancer in situ Breast cancer male  
 Breast cancer stage IV Breast discharge Breast discomfort  
 Breast disorder male Breast engorgement Breast  
 enlargement Breast feeding Breast malformation Breast mass  
 Breast neoplasm Breast pain Breast swelling Breast tenderness  
 Bronchitis Bronchospasm Candidiasis Carbohydrate tolerance  
 decreased Cardiac arrest Cardiac disorder Cardiac failure  
 Cardiac failure congestive Cardiovascular disorder  
 Carpal tunnel syndrome Cataract Cerebrovascular accident  
 Cerebrovascular disorder Cervix carcinoma Chest pain  
 Chills Chloasma Cholecystitis Cholelithiasis  
 Cholestasis Chorea Cold sweat Colorectal cancer Confusional  
 state Conjunctivitis Connective tissue disorder Constipation  
 Contact lens intolerance Convulsion Corneal opacity  
 Coronary artery disease Coronary artery thrombosis Cough  
 Cutaneous lupus erythematosus Cystitis Cystitis  
 noninfective Death Decreased appetite Deep vein thrombosis  
 Depression Dermatitis Dermatitis contact Diabetes mellitus  
 Diarrhoea Discomfort Disease progression Disturbance in  
 sexual arousal Diverticulitis Dizziness Drug interaction Dry  
 mouth Dry skin Dysmenorrhoea Dyspepsia Dysphonia Dyspnoea  
 Ear disorder Ear infection Ear pain Ectropion of  
 cervix Embolism venous Emotional disorder Emotional  
 distress Endocrine disorder Endometrial cancer Endometrial  
 disorder Endometriosis Epilepsy Erectile dysfunction  
 Erythema Erythema multiforme Erythema nodosum Eye  
 disorder Eye infection Eye pain Eyelid oedema Family  
 stress Fasting Fatigue Febrile neutropenia Feeling

abnormal Fibrocystic breast disease Flatulence Fluid retention  
 Flushing Foetal disorder Fungal infection Galactorrhoea  
 Gallbladder disorder Gastric disorder Gastritis  
 Gastroenteritis Gastrointestinal disorder Gastrointestinal  
 haemorrhage Gastrointestinal pain Gastrointestinal tract irritation  
 Gastrooesophageal reflux disease Genital candidiasis  
 Genital discharge Genital disorder female Glucose tolerance  
 decreased Glucose tolerance impaired Goitre Gynaecomastia  
 Haemangioma Haematoma Haematuria Haemoglobin Haemorrhage  
 Haemorrhoids Headache Heart rate irregular Hemiparesis  
 Hepatic cyst Hepatic function abnormal Hepatic steatosis  
 Hepatitis Hepatobiliary disease Hereditary angioedema  
 Herpes simplex Herpes virus infection Herpes zoster High  
 density lipoprotein decreased Hirsutism Hormone level abnormal  
 Hot flush Hyperaemia Hyperaesthesia Hypercalcaemia  
 Hypercholesterolaemia Hyperglycaemia Hyperhidrosis  
 Hyperlipidaemia Hypernatraemia Hypersensitivity  
 Hypertension Hypertonia Hypertriglyceridaemia Hypertrophy  
 Hypoaesthesia Hypocalcaemia Ichthyosis acquired Ill-  
 defined disorder Immune system disorder Incontinence Increased  
 appetite Increased tendency to bruise Infarction Infection  
 Infestation Influenza Influenza like illness Insomnia  
 Interstitial lung disease Intestinal obstruction  
 Irritability Ischaemic stroke Jaundice Jaundice  
 cholestatic Lacrimation increased Laryngitis Leiomyoma Lens  
 disorder Lethargy Leukopenia Libido decreased Libido increased  
 Liver function test abnormal Loss of consciousness Loss of  
 libido Lymphadenopathy Lymphoedema Macular degeneration  
 Macular oedema Malaise Mammogram abnormal Mantle cell  
 lymphoma Mass Mediastinal disorder Medical device complication  
 Menopausal symptoms Menopause Menorrhagia Menstrual  
 disorder Menstruation irregular Mental disorder Metastasis  
 Metastatic neoplasm Metrorrhagia Migraine Mood swings  
 Muscle contractions involuntary Muscle rigidity Muscle  
 spasms Muscular weakness Musculoskeletal discomfort  
 Musculoskeletal pain Musculoskeletal stiffness Myalgia  
 Myocardial infarction Myocardial ischaemia Nail disorder  
 Nasal congestion Nasopharyngitis Nausea Neck pain  
 Neoplasm malignant Nervous system disorder Nervousness  
 Neuralgia Neuritis Neuropathy peripheral Neutropenia Night  
 sweats Nipple pain Nuchal rigidity Obstruction Oedema  
 Oedema genital Oedema peripheral Oestrogenic effect  
 Oligomenorrhoea Optic nerve disorder Optic neuritis  
 Oropharyngeal pain Osteoarthritis Osteoporosis  
 Otitis media Ovarian cancer Ovarian cyst Pain Pain  
 in extremity Palpitations Pancreatic disorder  
 Pancreatitis Pancytopenia Paraesthesia  
 Pathological fracture Peliosis hepatis Pelvic pain Pemphigoid  
 Perineal pain Pharyngitis Phlebitis superficial  
 Pigmentation disorder Platelet count decreased Pleural  
 disorder Pleural infection Pneumonia Pollakiuria Polyp Polyuria  
 Porphyria Porphyria non-acute Postmenopausal haemorrhage  
 Precocious puberty Priapism Prurigo Pruritus  
 Pruritus generalised Pruritus genital Puberty Pulmonary  
 embolism Purpura Rash Rash erythematous Renal cancer

Reproductive tract disorder Respiratory disorder Respiratory tract infection Retinal disorder Retinal vein occlusion Retinal vein thrombosis Rhinitis Sarcoma uterus Sepsis Shock Sinus congestion Sinus headache Sinusitis Skin disorder Skin exfoliation Skin hypertrophy Skin irritation Skin ulcer Soft tissue disorder Somnolence Sticky skin Swelling Syncope Systemic lupus erythematosus Tenderness Tendon disorder Tension Tension headache Thirst Throat irritation Thrombocytopenia Thrombocytosis Thrombophlebitis Thrombophlebitis superficial Thrombosis Tinnitus Tooth abscess Tooth disorder Toothache Toxic shock syndrome Transaminases increased Tumour flare Tumour pain Ulcer Upper respiratory tract infection Urethral disorder Urinary incontinence Urinary tract disorder Urinary tract infection Urine output increased Urticaria Uterine cancer Uterine cervical erosion Uterine disorder Uterine enlargement Uterine haemorrhage Uterine leiomyoma Uterine pain Uterine polyp Vaginal discharge Vaginal disorder Vaginal haemorrhage Vaginal infection Vaginal inflammation Vaginal neoplasm Vaginal ulceration Vaginismus Varicose vein Vascular purpura Vasculitis Vasodilation procedure Venous occlusion Venous thrombosis Vertigo Viral infection Visual acuity reduced Visual impairment Vomiting Vulval disorder Vulvovaginal candidiasis Vulvovaginal discomfort Vulvovaginal dryness Vulvovaginal mycotic infection Vulvovaginal pain Vulvovaginal pruritus Vulvovaginitis Weight decreased Weight increased Wheezing Withdrawal bleed

\*\*\*\*\*  
\*\*\*\*\*

Monocarboxylate transporter 4 - Group: Transporter

Treated with:

- pyruvic acid: approved, nutraceutical small molecule (0 associated side effects) For nutritional supplementation, also for treating dietary shortage or imbalance
- gamma hydroxybutyric acid: illicit, approved small molecule (0 associated side effects) Used as a general anesthetic, to treat conditions such as insomnia, clinical depression, narcolepsy, and alcoholism, and to improve athletic performance.
- acetoacetic acid: experimental small molecule (0 associated side effects)
- formic acid: experimental small molecule (0 associated side effects)
- d-lactic acid: experimental small molecule (0 associated side effects)
- 3-phenylpyruvic acid: experimental small molecule (0 associated side effects)
- oxamic acid: experimental small molecule (0 associated side effects)
- alpha-ketoisovalerate: experimental small molecule (0 associated side effects)
- glyoxalate, glyoxylate: experimental small molecule (0 associated side effects)

known side effects mediated through drugs targeting this protein:

\*\*\*\*\*  
\*\*\*\*\*

Sodium channel subunit beta-4 - Group: Channel

Treated with:

zonisamide: approved small molecule (190 associated side effects) For use as adjunctive treatment of partial seizures in adults with epilepsy.

190 known side effects mediated through drugs targeting this protein:

Abdominal pain Abnormal dreams Acne Agitation Alanine  
aminotransferase increased Albuminuria Alopecia Amblyopia  
Amenorrhoea Anaemia Anxiety Apnoea Arthralgia  
Arthritis Aspartate aminotransferase increased Asthenia  
Ataxia Atrial fibrillation Bladder pain Blood  
lactate dehydrogenase increased Bradycardia Calculus bladder  
Cardiac failure Cardiac fibrillation Cerebrovascular  
accident Chest pain Cholangitis Cholecystitis Cholelithiasis  
Cognitive disorder Colitis Confusional state  
Conjunctivitis Constipation Convulsion Coordination  
abnormal Cough Deafness Decreased appetite Dehydration  
Depressed level of consciousness Dermatitis Dermatitis  
bullous Diarrhoea Diplopia Discomfort Disturbance in sexual  
arousal Dizziness Dry mouth Dry skin Duodenal ulcer  
Duodenitis Dysarthria Dysgeusia Dyskinesia Dyspepsia  
Dysphagia Dyspnoea Dystonia Dysuria Ecchymosis  
Eczema Embolism Encephalopathy Enuresis Erectile  
dysfunction Euphoric mood Extrasystoles Face oedema Faecal  
incontinence Fatigue Feeling abnormal Flank pain Flatulence  
Gait disturbance Gastritis Gastroenteritis Gastrointestinal  
pain Gingival bleeding Gingival hyperplasia Gingivitis Glaucoma  
Glossitis Gynaecomastia Haematemesis Haematuria  
Haemoglobin Haemoptysis Haemorrhage Headache Hirsutism  
Hyperaesthesia Hyperhidrosis Hyperkinesia Hyperplasia  
Hyperreflexia Hypersensitivity Hypertension Hypertonia  
Hypoglycaemia Hypokinesia Hyponatraemia Hypotension  
Hypotonia Ill-defined disorder Immunodeficiency  
Incontinence Influenza Insomnia Iritis  
Irritability Jaundice Jaundice cholestatic Leukopenia  
Libido decreased Loss of consciousness Lymphadenopathy  
Malaise Mastitis Melaena Menorrhagia Microcytic  
anaemia Micturition urgency Mouth ulceration Movement disorder  
Muscle relaxant therapy Muscle rigidity Muscle spasms  
Muscle twitching Muscular weakness Musculoskeletal discomfort  
Musculoskeletal stiffness Myalgia Myoclonus Nausea  
Nervousness Neuritis Neuropathy peripheral Nocturia  
Nuchal rigidity Nystagmus Oculogyric crisis Oedema  
Oedema peripheral Oesophagitis Osteoarthritis Pain  
Palpitations Paraesthesia oral Paralysis Parosmia  
Petechiae Pharyngitis Photophobia Pollakiuria Polyuria  
Pruritus Psychotic disorder Pulmonary embolism Rash  
Rash maculo-papular Rash pustular Rectal haemorrhage  
Rhinitis Scotoma Shock Somnolence Speech disorder  
Stomatitis Syncope Systemic lupus erythematosus Tachycardia  
Tension Thirst Thrombocytopenia Thrombophlebitis



Tinnitus Tremor Ulcer Urinary incontinence Urinary  
retention Urine output increased Urticaria VIIth nerve paralysis  
Vascular insufficiency Ventricular extrasystoles Vertigo  
Vomiting Weight decreased Weight increased

\*\*\*\*\*  
\*\*\*\*\*

Potassium voltage-gated channel subfamily D member 3 - Group:  
Channel

Treated with:

disopyramide: approved small molecule (85 associated side effects) For the treatment of documented ventricular arrhythmias, such as sustained ventricular tachycardia, ventricular pre-excitation and cardiac dysrhythmias. It is a Class Ia antiarrhythmic drug.

amitriptyline: approved small molecule (109 associated side effects) For the treatment of depression, chronic pain, irritable bowel syndrome, sleep disorders, diabetic neuropathy, agitation and insomnia, and migraine prophylaxis.

imipramine: approved small molecule (100 associated side effects) For the relief of symptoms of depression and as temporary adjunctive therapy in reducing enuresis in children aged 6 years and older. May also be used to manage panic disorders, with or without agoraphobia, as a second line agent in ADHD, management of eating disorders, for short-term management of acute depressive episodes in bipolar disorder and schizophrenia, and for symptomatic treatment of postherpetic neuralgia.

160 known side effects mediated through drugs targeting this protein:

Abdominal distension Abdominal pain upper Accommodation disorder  
Acute coronary syndrome Acute psychosis Affect lability  
Ageusia Agitation Agranulocytosis Alopecia Angioedema  
Antinuclear antibody positive Anxiety Arrhythmia  
Arthritis Asthenia Ataxia Atrioventricular block Blood  
creatinine increased Blood urea increased Body temperature  
increased Bradycardia Breast enlargement Cardiac arrest  
Cardiac failure Cardiac failure congestive Cardiac  
fibrillation Cardiomyopathy Cerebrovascular accident Chest  
pain Coma Conduction disorder Confusional state Constipation  
Convulsion Coordination abnormal Cyanosis Decreased  
appetite Delusion Dependence Dermatitis Dermatitis atopic  
Diarrhoea Diplopia Discomfort Disorientation  
Dissociation Disturbance in attention Disturbance in  
sexual arousal Dizziness Drug dependence Dry eye Dry mouth  
Dysarthria Dysgeusia Dyskinesia Dyspepsia Dyspnoea  
Dysuria Eosinophilia Erectile dysfunction  
Extrapyramidal disorder Face oedema Fatigue Feeling  
abnormal Feeling hot Flatulence Flushing Galactorrhoea  
Gynaecomastia Haemoglobin decreased Hallucination  
Headache Hepatic enzyme increased Hepatic failure  
Hepatitis Hypercholesterolaemia Hyperhidrosis  
Hyperpyrexia Hypertension Hypertrophy Hypoaesthesia  
Hypoglycaemia Hypokalaemia Hypomania Hypotension Ileus  
paralytic Ill-defined disorder Inappropriate antidiuretic hormone  
secretion Infarction Insomnia Intraocular pressure increased

Irritability      Jaundice      Jaundice cholestatic      Leukopenia  
 Libido decreased      Loss of consciousness      Lymphadenitis  
 Malaise      Mania      Mental disability      Mental disorder      Mental  
 status changes      Mood swings      Muscle rigidity      Muscle spasms  
 Muscular weakness      Mydriasis      Myocardial infarction      Nasal  
 dryness      Nausea      Nervousness      Neuroleptic malignant syndrome  
 Neuropathy peripheral      Neutropenia      Nightmare      Nodal rhythm  
 Oedema      Orthostatic hypotension      Osteoarthritis      Pain  
 Pallor      Palpitations      Pancytopenia      Paraesthesia  
 Parotid gland enlargement      Petechiae      Pollakiuria      Pruritus  
 Psychotic disorder      Purpura      Rash generalised      Rash  
 morbilliform      Sensory loss      Shock      Sinus arrest      Skin  
 disorder      Sleep disorder      Somnolence      Stomatitis      Swelling  
 Syncope      Systemic lupus erythematosus      Tachycardia      Tardive  
 dyskinesia      Tension      Testicular swelling      Thrombocytopenia  
 Tinnitus      Tongue discolouration      Tremor      Urinary  
 hesitation      Urinary retention      Urticaria      Vascular purpura      Vertigo  
 Vision blurred      Vomiting      Weight increased

\*\*\*\*\*  
 \*\*\*\*\*

Atrial natriuretic peptide clearance receptor - Group: Receptor

Treated with:

alpha-d-mannose: experimental      small molecule      (0 associated side effects)

nesiritide: approved      biotech      (0 associated side effects) For the intravenous treatment of patients with acutely decompensated congestive heart failure who have dyspnea at rest or with minimal activity.

known side effects mediated through drugs targeting this protein:

\*\*\*\*\*  
 \*\*\*\*\*

Glutamate receptor, ionotropic kainate 2 - Group: Channel

Treated with:

l-glutamic acid: approved, nutraceutical small molecule      (0 associated side effects)      Considered to be nature's "Brain food" by improving mental capacities; helps speed the healing of ulcers; gives a "lift" from fatigue; helps control alcoholism, schizophrenia and the craving for sugar.

butabarbital:      illicit, approved small molecule      (0 associated side effects)      For short-term treatment of insomnia and anxiety disorders

butalbital: illicit, approved small molecule      (0 associated side effects)      Used in combination with acetaminophen or aspirin and caffeine for its sedative and relaxant effects in the treatment of tension headaches, migraines, and pain.

talbutal:      illicit, approved small molecule      (0 associated side effects)      For use as a sedative and hypnotic.

pentobarbital:      approved      small molecule      (38 associated side effects)      For the short-term treatment of insomnia.

secobarbital:      approved      small molecule      (38 associated side effects)      For the Short-term treatment of intractable insomnia for patients habituated to barbiturates

metharbital: approved small molecule (0 associated side effects) Metharbital is used for the treatment of epilepsy.

thiopental: approved small molecule (0 associated side effects)  
 For use as the sole anesthetic agent for brief (15 minute) procedures, for induction of anesthesia prior to administration of other anesthetic agents, to supplement regional anesthesia, to provide hypnosis during balanced anesthesia with other agents for analgesia or muscle relaxation, for the control of convulsive states during or following inhalation anesthesia or local anesthesia, in neurosurgical patients with increased intracranial pressure, and for narcoanalysis and narcosynthesis in psychiatric disorders.

primidone: approved small molecule (16 associated side effects)  
 For the treatment of epilepsy

methylphenobarbital: approved small molecule (37 associated side effects) For the relief of anxiety, tension, and apprehension, also used as an anticonvulsant for the treatment of epilepsy.

amobarbital: illicit, approved small molecule (0 associated side effects)

aprobarbital: illicit, approved small molecule (0 associated side effects)

butethal: illicit, approved small molecule (0 associated side effects) For the treatment of insomnia.

heptabarbital: approved small molecule (0 associated side effects) Used mainly for sedation and hypnosis.

hexobarbital: approved small molecule (0 associated side effects) For the induction of anesthesia prior to the use of other general anesthetic agents and for induction of anesthesia for short surgical, diagnostic, or therapeutic procedures associated with minimal painful stimuli.

barbituric acid derivative: illicit, experimental small molecule (0 associated side effects)

domoic acid: experimental small molecule (0 associated side effects)

quisqualate: experimental small molecule (0 associated side effects)

2s,4r-4-methylglutamate: experimental small molecule (0 associated side effects)

64 known side effects mediated through drugs targeting this protein:

Agitation Agranulocytosis Anaemia Anaemia megaloblastic  
 Angioedema Anxiety Aplasia Apnoea Arthralgia  
 Asthenia Asthma Ataxia Body temperature increased  
 Bradycardia Confusional state Constipation Cytolytic  
 hepatitis Decreased appetite Delirium Depressed level of  
 consciousness Dermatitis Dermatitis exfoliative Diplopia  
 Dizziness Emotional disorder Fatigue Feeling abnormal  
 Hallucination Hangover Headache Hepatocellular injury  
 Hyperkinesia Hypersensitivity Hypotension Hypoventilation  
 Hypoxia Injection site reaction Insomnia  
 Irritability Lethargy Liver injury Loss of  
 consciousness Musculoskeletal discomfort Myalgia Nausea  
 Nervousness Nightmare Nystagmus Osteomalacia Pain  
 Phobia Pulmonary function test decreased Rash Respiratory  
 depression Respiratory failure Shock Somnolence Swelling

Syncope      Tension      Toxic epidermal necrolysis      Urticaria  
Vertigo      Vomiting

\*\*\*\*\*  
\*\*\*\*\*

Voltage-dependent L-type calcium channel subunit beta-3 - Group:  
Channel

Treated with:

nimodipine: approved      small molecule      (47 associated side effects)

For use as an adjunct to improve neurologic outcome following subarachnoid hemorrhage (SAH) from ruptured intracranial berry aneurysms by reducing the incidence and severity of ischemic deficits.

verapamil: approved      small molecule      (113 associated side effects)      For the treatment of hypertension, angina, and cluster headache prophylaxis.

mibefradil: withdrawn      small molecule      (0 associated side effects)  
For the treatment of angina and high blood pressure.

139 known side effects mediated through drugs targeting this protein:

Abdominal discomfort      Acne      Acute coronary syndrome      Alanine aminotransferase increased      Alopecia      Anaemia      Anaphylactic shock      Angioedema      Arthralgia      Asthenia      Atrioventricular block      Atrioventricular block complete      Atrioventricular dissociation      Balance disorder      Blindness      Blood alkaline phosphatase increased      Blood lactate dehydrogenase increased      Blood prolactin increased      Blood urea increased      Bradycardia      Bronchospasm      Cardiac failure      Cardiac failure congestive      Cardiomyopathy      Cerebrovascular accident      Chest pain      Cholestasis      Confusional state      Constipation      Convulsion      Deep vein thrombosis      Depressive symptom      Dermatitis      Diarrhoea      Diplopia      Discomfort      Disseminated intravascular coagulation      Dissociation      Dizziness      Dry mouth      Dyspepsia      Dyspnoea      Ecchymosis      Electrocardiogram abnormal      Erectile dysfunction      Erythema      Erythema multiforme      Extrapyrmidal disorder      Fasting      Fatigue      Feeling abnormal      Feeling cold      Fluid retention      Flushing      Galactorrhoea      Gastrointestinal disorder      Gastrointestinal haemorrhage      Gingival hyperplasia      Gynaecomastia      Haematoma      Headache      Hepatic enzyme increased      Hepatic function abnormal      Hepatitis      Hyperhidrosis      Hyperkeratosis      Hyperplasia      Hyperprolactinaemia      Hypersensitivity      Hypertension      Hypertrophic cardiomyopathy      Hypertrophy      Hypoaesthesia      Hyponatraemia      Hypotension      Ileus      paralytic      Infection      Influenza      Insomnia      Intermittent claudication      Jaundice      Joint swelling      Laryngospasm      Lethargy      Liver function test abnormal      Loss of consciousness      Macule      Muscle fatigue      Muscle spasms      Muscular weakness      Musculoskeletal discomfort      Myalgia      Myocardial infarction      Nausea      Nystagmus      Oedema      Oedema peripheral      Oligomenorrhoea      Orthostatic hypotension      Pain      Palpitations      Paraesthesia      Paralysis      Pharyngitis      Platelet count decreased      Pollakiuria      Pruritus      Pulmonary oedema      Purpura      Quadriparesis      Rash      Rash maculo-papular      Respiratory failure      Respiratory tract infection      Rhinitis      Sensory loss      Shock      Sinus arrest      Sinusitis      Sleep

disorder Somnolence Syncope Tachycardia Thrombocytopenia  
Thrombosis Tinnitus Tremor Upper respiratory tract  
infection Urticaria Vascular purpura Vasculitis Vasospasm  
Venous thrombosis Vertigo Vision blurred Visual acuity  
reduced Visual impairment Vomiting Wheezing

\*\*\*\*\*  
\*\*\*\*\*

Antigen peptide transporter 1 - Group: Transporter

Treated with:

lapatinib: approved small molecule (0 associated side effects)

Indicated in combination with capecitabine for the treatment of patients with advanced or metastatic breast cancer whose tumors overexpress the human epidermal receptor type 2 (HER2) protein and who have received prior therapy including an anthracycline, a taxane, and trastuzuma.

adenosine-5'-diphosphate: experimental small molecule (0 associated side effects)

known side effects mediated through drugs targeting this protein:

\*\*\*\*\*  
\*\*\*\*\*

Probable N-acetylneuraminic acid outer membrane channel protein nanC - Group: Channel

Treated with:

lauryl dimethylamine-n-oxide: experimental small molecule (0 associated side effects)

known side effects mediated through drugs targeting this protein:

\*\*\*\*\*  
\*\*\*\*\*

BDNF/NT-3 growth factors receptor - Group: Enzyme

Treated with:

amitriptyline: approved small molecule (109 associated side effects) For the treatment of depression, chronic pain, irritable bowel syndrome, sleep disorders, diabetic neuropathy, agitation and insomnia, and migraine prophylaxis.

109 known side effects mediated through drugs targeting this protein:

Acute coronary syndrome Ageusia Agitation Agranulocytosis  
Alopecia Antinuclear antibody positive Anxiety  
Arrhythmia Arthritis Asthenia Ataxia Atrioventricular  
block Body temperature increased Breast enlargement  
Cardiomyopathy Cerebrovascular accident Coma Confusional  
state Constipation Convulsion Coordination abnormal Decreased  
appetite Delusion Dependence Dermatitis atopic Diarrhoea  
Discomfort Disorientation Disturbance in attention  
Disturbance in sexual arousal Dizziness Drug dependence  
Dry mouth Dysarthria Dysgeusia Dyskinesia Dyspepsia  
Eosinophilia Erectile dysfunction Extrapyrmidal  
disorder Face oedema Fatigue Feeling abnormal Galactorrhoea  
Gynaecomastia Hallucination Headache Hepatic failure  
Hepatitis Hyperhidrosis Hyperpyrexia Hypertension

Hypertrophy Hypoaesthesia Hypomania Hypotension Ileus  
 paralytic Ill-defined disorder Inappropriate antidiuretic hormone  
 secretion Infarction Insomnia Intraocular pressure increased  
 Irritability Jaundice Leukopenia Libido decreased Loss  
 of consciousness Malaise Mania Mental disability Mental status  
 changes Muscle rigidity Mydriasis Myocardial infarction  
 Nausea Neuroleptic malignant syndrome Neuropathy  
 peripheral Nightmare Oedema Orthostatic hypotension  
 Osteoarthritis Palpitations Pancytopenia  
 Paraesthesia Parotid gland enlargement Pollakiuria  
 Purpura Rash Sensory loss Shock Sleep disorder  
 Somnolence Stomatitis Swelling Syncope Systemic lupus  
 erythematosus Tachycardia Tardive dyskinesia Testicular  
 swelling Thrombocytopenia Tinnitus Tongue discolouration  
 Tremor Urinary retention Urticaria Vascular purpura  
 Vision blurred Vomiting Weight increased

\*\*\*\*\*  
 \*\*\*\*\*

Estrogen-related receptor gamma - Group: Receptor

Treated with:

troglitazone: withdrawn small molecule (32 associated side effects)  
 For the treatment of Type II diabetes mellitus. It is used alone or in combination with a sulfonylurea, metformin, or insulin as an adjunct to diet and exercise.

diethylstilbestrol: approved small molecule (0 associated side effects)  
 Used in the treatment of prostate cancer.

Previously used in the prevention of miscarriage or premature delivery in pregnant women prone to miscarriage or premature delivery.

cholic acid: experimental small molecule (0 associated side effects)

4-hydroxy-n'-(4-isopropylbenzyl)benzohydrazide: experimental  
 small molecule (0 associated side effects)

4-(1-methyl-1-phenylethyl)phenol: experimental small molecule  
 (0 associated side effects)

4,4'-propane-2,2-diylidiphenol: experimental small molecule  
 (0 associated side effects)

4,4'-cyclohexane-1,1-diylidiphenol: experimental small molecule  
 (0 associated side effects)

31 known side effects mediated through drugs targeting this protein:

Abdominal pain Alanine aminotransferase increased Anaemia  
 Asthenia Blood creatine phosphokinase increased Body  
 temperature increased Cardiac failure Cardiac failure congestive  
 Decreased appetite Discomfort Dizziness Fatigue  
 Feeling abnormal Gastrointestinal pain Hepatic function  
 abnormal Hepatitis Hyperglycaemia Ill-defined disorder  
 Jaundice Laboratory test abnormal Liver function test  
 abnormal Loss of consciousness Malaise Nausea Oedema  
 Pain Shock Syncope Volume blood increased Vomiting  
 Weight increased

\*\*\*\*\*  
 \*\*\*\*\*

Voltage-dependent calcium channel subunit alpha-2/delta-3 - Group:  
 Channel

Treated with:

amlodipine: approved small molecule (136 associated side effects) For the treatment of hypertension and chronic stable angina.

nilvadipine: approved small molecule (0 associated side effects) For the management of vasospastic angina, chronic stable angina and hypertension.

136 known side effects mediated through drugs targeting this protein:

Abdominal pain Abnormal dreams Accommodation disorder Acute coronary syndrome Agitation Alopecia Amnesia Angioedema  
Angiopathy Anxiety Apathy Arrhythmia Arthralgia  
Arthropathy Asthenia Ataxia Atrial fibrillation Back pain  
Blindness Bradycardia Cardiac failure congestive Cardiac fibrillation  
Chest pain Chills Cholestasis Chronic obstructive pulmonary disease  
Cold sweat Conjunctivitis Constipation Cough Decreased appetite  
Depersonalisation Dermatitis Diabetes mellitus Diarrhoea Diplopia Discomfort  
Dizziness postural Dry mouth Dry skin Dysgeusia Dyspepsia  
Dysphagia Dyspnoea Dysuria Epistaxis Erythema  
Erythema multiforme Extrasystoles Eye pain Fatigue  
Feeling abnormal Flat affect Flatulence Flushing Gastritis  
Gastrointestinal pain Gingival hyperplasia Gynaecomastia  
Headache Hepatitis Hot flush Hyperglycaemia Hyperhidrosis  
Hyperplasia Hypersensitivity Hypertension Hypertonia  
Hypoaesthesia Ill-defined disorder Increased appetite  
Infarction Insomnia Ischaemia Jaundice Leukopenia  
Loss of consciousness Lung disorder Malaise Menopausal symptoms  
Micturition disorder Migraine Muscle spasms Muscle twitching  
Muscular weakness Musculoskeletal discomfort Myalgia  
Myocardial infarction Nausea Nervousness Neuropathy peripheral  
Nocturia Obstructive airways disorder Oedema Oedema peripheral  
Orthostatic hypotension Osteoarthritis Pain Palpitations  
Pancreatitis Paraesthesia Parosmia Peripheral ischaemia  
Peripheral vascular disorder Pollakiuria Polyuria Pruritus  
Purpura Rash Rash erythematous Rash maculo-papular  
Rhinitis Sexual dysfunction Shock Skin discoloration  
Somnolence Sticky skin Syncope Tachycardia Tension  
Thirst Thrombocytopenia Tinnitus Tremor Urine output increased  
Urticaria Vascular purpura Vasculitis Ventricular tachycardia  
Vertigo Visual acuity reduced Visual impairment Vomiting  
Weight decreased Weight increased Xerophthalmia

\*\*\*\*\*  
\*\*\*\*\*

Neuronal acetylcholine receptor subunit beta-4 - Group: Channel

Treated with:

nicotine: approved small molecule (98 associated side effects) For the relief of nicotine withdrawal symptoms and as an aid to smoking cessation.

galantamine: approved small molecule (160 associated side effects) For the treatment of mild to moderate dementia of the Alzheimer's type. Has also been investigated in patients with mild

cognitive impairment who did not meet the diagnostic criteria for Alzheimer's disease.

pentolinium: approved small molecule (0 associated side effects) Used to produce controlled hypotension during surgical procedures and in hypertensive crises.

levomethadyl acetate: approved small molecule (0 associated side effects) For the treatment and management of opiate dependence. It is sometimes used to treat severe pain in terminal patients.

213 known side effects mediated through drugs targeting this protein:

Abdominal discomfort Abdominal pain Acne Affect lability  
Aggression Agitation Amnesia Anaemia Anxiety  
Apathy Aphasia Apraxia Arrhythmia Arrhythmia  
supraventricular Arthralgia Arthritis Asthenia Ataxia  
Atrial fibrillation Atrioventricular block Back pain  
Bladder pain Blindness Blister Blood alkaline  
phosphatase increased Blood urea increased Body temperature  
increased Bone pain Bradycardia Bronchitis Bronchospasm  
Bundle branch block Cardiac failure Cardiac fibrillation  
Cardiovascular disorder Cataract Cerebrovascular  
accident Cerebrovascular disorder Chest discomfort Chest pain  
Coagulopathy Completed suicide Confusional state  
Constipation Convulsion Coordination abnormal Cough  
Cystitis Cystitis noninfective Decreased appetite  
Dehydration Delirium Dependence Depression Dermatitis  
Dermatitis bullous Diarrhoea Discomfort Disturbance in  
attention Disturbance in sexual arousal Diverticulitis  
Dizziness Drug abuse Drug dependence Dry mouth Dysgeusia  
Dysmenorrhoea Dyspepsia Dysphagia Dysphonia Dyspnoea  
Ear pain Electrocardiogram QT prolonged Electrocardiogram  
T wave inversion Epistaxis Eye disorder Eye irritation  
Fatigue Feeling abnormal Flat affect Flatulence Flushing  
Gastric disorder Gastritis Gastroenteritis Gastrointestinal  
haemorrhage Gastrointestinal pain Gravitational oedema Haematuria  
Haemoglobin Haemorrhage Hallucination Headache Hepatic  
enzyme increased Hepatitis Hepatobiliary disease Hiccups  
Hyperglycaemia Hyperhidrosis Hyperkinesia  
Hypersensitivity Hypersomnia Hypertension Hypertonia  
Hypoaesthesia Hypokalaemia Hypokinesia Hypotension Ill-  
defined disorder Immune system disorder Incontinence Increased  
appetite Increased bronchial secretion Infarction Infection  
Influenza Insomnia Irritability Ischaemia Lacrimation  
increased Lethargy Libido increased Liver disorder Loss of  
consciousness Lower gastrointestinal haemorrhage Malaise  
Melaena Menstrual disorder Mental disability Mental  
disorder Migraine Mood swings Muscle contractions involuntary  
Muscle spasms Musculoskeletal discomfort Musculoskeletal  
disorder Myalgia Myocardial ischaemia Nasal congestion Nasal  
discomfort Nasal ulcer Nasopharyngitis Nausea Nephrolithiasis  
Nervous system disorder Nervousness Neuropathy peripheral  
Nightmare Nocturia Oedema Oedema peripheral Oesophageal  
disorder Oesophageal perforation Orthostatic hypotension  
Pain Pain in extremity Pain in jaw Palpitations



Paraesthesia Paranoia Pharyngitis Pneumonia Pollakiuria  
 Pruritus Purpura Rash Rectal haemorrhage Renal  
 failure Respiratory disorder Respiratory tract infection  
 Rhinitis Rhinorrhoea Salivary hypersecretion Sensory  
 loss Shock Sinusitis Sleep disorder Sneezing Somnolence  
 Sputum increased Stomatitis Suicidal ideation Suicide attempt  
 Supraventricular tachycardia Syncope Tachycardia Tension  
 Throat irritation Thrombocytopenia Thrombocytosis Tinnitus  
 Tobacco user Tooth disorder Transient ischaemic attack  
 Tremor Ulcer Upper respiratory tract infection Urethral  
 disorder Urinary incontinence Urinary retention Urinary tract  
 disorder Urinary tract infection Vascular dementia Vascular  
 purpura Ventricular tachycardia Vertigo Vision blurred  
 Visual acuity reduced Visual impairment Vomiting Weight  
 decreased Weight increased Withdrawal syndrome

\*\*\*\*\*  
 \*\*\*\*\*

Alpha-1A adrenergic receptor - Group: Receptor

Treated with:

midodrine: approved small molecule (44 associated side effects)

For the treatment of symptomatic orthostatic hypotension (OH).  
 ziprasidone: approved small molecule (251 associated side effects) For the treatment of schizophrenia and related psychotic disorders.

dapiprazole: approved small molecule (0 associated side effects) Used in the treatment of iatrogenically induced mydriasis produced by adrenergic (phenylephrine) or parasympatholytic (tropicamide) agents used in certain eye examinations.

amitriptyline: approved small molecule (109 associated side effects) For the treatment of depression, chronic pain, irritable bowel syndrome, sleep disorders, diabetic neuropathy, agitation and insomnia, and migraine prophylaxis.

olanzapine: approved small molecule (393 associated side effects) For the acute and maintenance treatment of schizophrenia and related psychotic disorders, as well as acute treatment of manic or mixed episodes of bipolar 1 disorder. Intramuscular olanzapine is indicated for the rapid control of agitated patients.

alfuzosin: approved small molecule (92 associated side effects)

For the reduction of urinary obstruction and relief of associated manifestations (eg. sensation of incomplete bladder emptying or straining, urgency, interrupted or weak stream) in patients with symptomatic benign prostatic hyperplasia.

clozapine: approved small molecule (228 associated side effects) For use in patients with treatment-resistant schizophrenia.

norepinephrine: approved small molecule (22 associated side effects) Mainly used to treat patients in vasodilatory shock states such as septic shock and neurogenic shock and has shown a survival benefit over dopamine. Also used as a vasopressor medication for patients with critical hypotension.

phenylpropanolamine: approved, withdrawn small molecule (0 associated side effects) For the treatment of nasal congestion, control of urinary incontinence, priapism and obesity.

promazine: approved small molecule (0 associated side effects)  
 Used as an adjunct for short term treatment of moderate and

severe psychomotor agitation. Also used to treat agitation or restlessness in the elderly.

dipivefrin: approved small molecule (12 associated side effects)

Dipivefrin is a prodrug which is used as initial therapy for the control of intraocular pressure in chronic open-angle glaucoma.

droperidol: approved small molecule (29 associated side effects)

Droperidol is used to produce tranquilization and to reduce the incidence of nausea and vomiting in surgical and diagnostic procedures.

prazosin: approved small molecule (93 associated side effects)

For treatment of hypertension, symptomatic benign prostatic hyperplasia, and severe congestive heart failure. May also be used alone or in combination with  $\beta$ -blockers in the preoperative management of signs and symptoms of pheochromocytoma.

imipramine: approved small molecule (100 associated side effects) For the relief of symptoms of depression and as temporary adjunctive therapy in reducing enuresis in children aged 6 years and older. May also be used to manage panic disorders, with or without agoraphobia, as a second line agent in ADHD, management of eating disorders, for short-term management of acute depressive episodes in bipolar disorder and schizophrenia, and for symptomatic treatment of postherpetic neuralgia.

chlorpromazine: approved small molecule (111 associated side effects) For the treatment of schizophrenia, control nausea and vomiting, For relief of restlessness and apprehension before surgery, adjunct in the treatment of tetanus, control the manifestations of the manic type of manic-depressive illness.

nortriptyline: approved small molecule (91 associated side effects) For the treatment of depression, chronic pain, irritable bowel syndrome, sleep disorders, diabetic neuropathy, agitation and insomnia, and migraine prophylaxis.

amoxapine: approved small molecule (103 associated side effects) For the relief of symptoms of depression in patients with neurotic or reactive depressive disorders as well as endogenous and psychotic depressions. May also be used to treat depression accompanied by anxiety or agitation.

doxazosin: approved small molecule (243 associated side effects) For treatment and management of mild to moderate hypertension and urinary obstruction symptoms caused by BPH.

labetalol: approved small molecule (103 associated side effects) For the management of hypertension (alone or in combination with other classes of antihypertensive agents), as well as chronic stable angina pectoris and sympathetic overactivity syndrome associated with severe tetanus. Labetalol is used parenterally for immediate reduction in blood pressure in severe hypertension or in hypertensive crises when considered an emergency, for the control of blood pressure in patients with pheochromocytoma and pregnant women with preeclampsia, and to produce controlled hypotension during anesthesia to reduce bleeding resulting from surgical procedures.

metaraminol: approved small molecule (0 associated side effects) For the treatment and prevention of hypotension due to hemorrhage, spinal anesthesia, and shock associated with brain damage

nicardipine: approved small molecule (107 associated side effects) Used for the management of patients with chronic stable angina and for the treatment of hypertension.

trazodone: approved small molecule (194 associated side effects) For the treatment of depression.

thioridazine: approved small molecule (92 associated side effects) For the treatment of schizophrenia and generalized anxiety disorder.

phentolamine: approved small molecule (28 associated side effects) Used as an aid for the diagnosis of pheochromocytoma, and may be administered immediately prior to or during pheochromocytectomy to prevent or control paroxysmal hypertension resulting from anesthesia, stress, or operative manipulation of the tumor. Phentolamine has also been used to treat hypertensive crisis caused by sympathomimetic amines or catecholamine excess by certain foods or drugs in patients taking MAO inhibitors, or by clonidine withdrawal syndrome. Other indications include the prevention of dermal necrosis and sloughing following IV administration or extravasation of norepinephrine, decrease in impedance to left ventricular ejection and the infarct size in patients with MI associated with left ventricular failure, treatment of erectile dysfunction through self-injection of small doses combined with papaverine hydrochloride into the corpus cavernosum, and as an adjunct to the management of cocaine overdose to reverse coronary vasoconstriction following use of oxygen, benzodiazepines, and nitroglycerin.

ergotamine: approved small molecule (15 associated side effects) For use as therapy to abort or prevent vascular headache, e.g., migraine, migraine variants, or so called "histaminic cephalalgia".

nicergoline: approved small molecule (0 associated side effects) For the treatment of senile dementia, migraines of vascular origin, transient ischemia, platelet hyper-aggregability, and macular degeneration.

tamsulosin: approved small molecule (79 associated side effects) Used in the treatment of signs and symptoms of benign prostatic hyperplasia (reduction in urinary obstruction and relief of associated manifestations such as hesitancy, terminal dribbling of urine, interrupted or weak stream...etc.)

methoxamine: approved small molecule (0 associated side effects) Indicated for the treatment and management of hypotension.

trimipramine: approved small molecule (0 associated side effects) For the treatment of depression and depression accompanied by anxiety, agitation or sleep disturbance

risperidone: approved small molecule (532 associated side effects) For the treatment of schizophrenia in adults and in adolescents, ages 13 to 17, and for the short-term treatment of manic or mixed episodes of bipolar I disorder in children and adolescents ages 10 to 17. May also be used to manage symptoms of inappropriate behavior due to aggression and/or psychosis in patients with severe dementia.

epinastine: approved small molecule (12 associated side effects) For the prevention of itching associated with allergic conjunctivitis.

propiomazine: approved small molecule (0 associated side effects) Propiomazine is largely used for its antihistaminic sleep inducing effects in treating insomnia.

tolazoline: approved small molecule (0 associated side effects)  
For the treatment of pulmonary artery anomalies

trifluoperazine: approved small molecule (111 associated side effects) For the treatment of anxiety disorders, depressive symptoms secondary to anxiety and agitation.

pseudoephedrine: approved small molecule (0 associated side effects) For the treatment of nasal congestion, sinus congestion, Eustachian tube congestion, and vasomotor rhinitis, and as an adjunct to other agents in the optimum treatment of allergic rhinitis, croup, sinusitis, otitis media, and tracheobronchitis. Also used as first-line therapy of priapism.

benzphetamine: illicit, approved small molecule (0 associated side effects) For the management of exogenous obesity as a short term adjunct (a few weeks) in a regimen of weight reduction based on caloric restriction

flupenthixol: approved small molecule (0 associated side effects) For use in the treatment of schizophrenia and depression

phenoxybenzamine: approved small molecule (9 associated side effects) For the treatment of pheochromocytoma (malignant), benign prostatic hypertrophy and malignant essential hypertension.

maprotiline: approved small molecule (0 associated side effects) For treatment of depression, including the depressed phase of bipolar depression, psychotic depression, and involuntional melancholia, and may also be helpful in treating certain patients suffering severe depressive neurosis.

oxymetazoline: approved small molecule (0 associated side effects) For treatment of nasal congestion and redness associated with minor irritations of the eye

apraclonidine: approved small molecule (85 associated side effects) For prevention or reduction of intraoperative and postoperative increases in intraocular pressure (IOP) before and after ocular laser surgery when used prophylactically. Also used as a short-term adjunctive therapy in patients with open-angle glaucoma who are on maximally tolerated medical therapy requiring additional IOP reduction.

ergoloid mesylate: approved small molecule (0 associated side effects) For use as an adjunct therapy for patients with dementia

promethazine: approved small molecule (80 associated side effects) For the treatment of allergic disorders, and nausea/vomiting.

carvedilol: approved small molecule (198 associated side effects) For the treatment of mild or moderate (NYHA class II or III) heart failure of ischemic or cardiomyopathic origin.

doxepin: approved small molecule (210 associated side effects) Labeled indications: depression and insomnia. Unlabeled indications: chronic and neuropathic pain, anxiety, idiopathic urticaria.

nefazodone: approved, withdrawn small molecule (246 associated side effects) For the treatment of depression.

desipramine: approved small molecule (120 associated side effects) For relief of symptoms in various depressive syndromes,

especially endogenous depression. It has also been used to manage chronic peripheral neuropathic pain, as a second line agent for the management of anxiety disorders (e.g. panic disorder, generalized anxiety disorder), and as a second or third line agent in the ADHD management.

terazosin: approved small molecule (115 associated side effects) For the treatment of symptomatic BPH and mild to moderate hypertension.

escitalopram: approved small molecule (0 associated side effects) Labeled indications include major depressive disorder (MDD) and generalized anxiety disorder (GAD). Unlabeled indications include treatment of mild dementia-associated agitation in nonpsychotic patients.

pergolide: approved,withdrawn small molecule (354 associated side effects) Indicated as adjunctive treatment to levodopa/carbidopa in the management of the signs and symptoms of Parkinson's disease. It was withdrawn from the US and Canadian markets in 2007 due to an increased risk of cardiac valvulopathy.

bromocriptine: approved small molecule (120 associated side effects) For the treatment of galactorrhea due to hyperprolactinemia, prolactin-dependent menstrual disorders and infertility, prolactin-secreting adenomas, prolactin-dependent male hypogonadism, as adjunct therapy to surgery or radiotherapy for acromegaly or as monotherapy in special cases, as monotherapy in early Parkinsonian Syndrome or as an adjunct with levodopa in advanced cases with motor complications. Bromocriptine has also been used off-label to treat restless legs syndrome and neuroleptic malignant syndrome.

quetiapine: approved small molecule (359 associated side effects) For the treatment of schizophrenia and related psychotic disorders.

aripiprazole: approved small molecule (630 associated side effects) For the treatment of schizophrenia and related psychotic disorders.

ergonovine: approved small molecule (0 associated side effects) Used to treat postpartum haemorrhage and postabortion haemorrhage in patients with uterine atony.

paliperidone: approved small molecule (216 associated side effects) For the treatment of schizophrenia.

dihydroergotoxine: approved small molecule (0 associated side effects) For potential use in the treatment of Alzheimer's disease.

bevantolol: approved small molecule (0 associated side effects) For the treatment of angina pectoris and hypertension.

mephentermine: approved small molecule (0 associated side effects) Used to maintain blood pressure in hypotensive states.

methotrimeprazine: approved small molecule (0 associated side effects) For the treatment of psychosis, particular those of schizophrenia, and manic phases of bipolar disorder.

4-methoxyamphetamine: illicit,experimental small molecule (0 associated side effects)

dextroamphetamine: illicit,approved small molecule (0 associated side effects) Used to treat attention deficit hyperactivity disorder (ADHD).

phendimetrazine: illicit, approved small molecule (0 associated side effects) Used in the management of exogenous obesity as a short term adjunct (a few weeks) in a regimen of weight reduction based on caloric restriction.

acepromazine: approved small molecule (0 associated side effects) Acepromazine was first used in humans in the 1950s as an antipsychotic agent. It is now rarely used in humans. Acepromazine is frequently used in animals as a sedative and antiemetic. Its principal value is in quietening and calming anxious animals.

thiopropazine: approved small molecule (0 associated side effects) For the treatment of all types of acute and chronic schizophrenia, including those which did not respond to the usual neuroleptics; manic syndromes.

zuclopenthixol: approved small molecule (0 associated side effects) For the management of the manifestations of schizophrenia.

sertindole: approved, withdrawn small molecule (0 associated side effects) Used in the treatment of schizophrenia.

droxidopa: approved small molecule (0 associated side effects)

For treatment of neurogenic orthostatic hypotension (NOH) associated with various disorders including Multiple System Atrophy, Familial Amyloid Polyneuropathy, hemodialysis induced hypotension and Parkinson's Disease. Also investigated for use/treatment in neurologic disorders, nephropathy, blood (blood forming organ disorders, unspecified), and dizzy/fainting spells.

xylometazoline: approved small molecule (0 associated side effects) It is used for treating nasal congestion and minor inflammation due to allergies or colds.

isometheptene: approved small molecule (0 associated side effects) Isometheptene is a sympathomimetic drug which causes vasoconstriction. It is used for treating migraines and tension headaches.

levonordefrin: approved small molecule (0 associated side effects) Used as a topical nasal decongestant and vasoconstrictor in dentistry.

naphazoline: approved small molecule (18 associated side effects) Naphazoline is primarily indicated in conditions like Corneal vascularity, Hyperaemia, Itching, Nasal congestion, and can also be given in adjunctive therapy as an alternative drug of choice in Sinusitis

1155 known side effects mediated through drugs targeting this protein:

Abasia Abdominal discomfort Abdominal distension Abdominal pain Abdominal pain lower Abdominal pain upper Abdominal tenderness Abnormal dreams Abnormal faeces Abscess Accommodation disorder Acidosis Acne Acute abdomen Acute coronary syndrome Acute psychosis Adenocarcinoma Adenoma benign infarction Acute psychosis Affect lability Affective disorder Adjustment disorder Affect lability Affective disorder Ageusia Aggression Agitation Agoraphobia Agranulocytosis Akathisia Akinesia Alanine aminotransferase increased Albright's disease Albuminuria Alcohol intolerance Alkalosis Alopecia Altered state of consciousness Amblyopia Amenorrhoea Amnesia Anaemia Anaemia

macrocytic Anaemia megaloblastic Anaphylactic shock  
 Anaphylactoid reaction Aneurysm Anger Angina pectoris  
 Angina unstable Angioedema Angiopathy Angle closure glaucoma  
 Anorectal discomfort Anorgasmia Anoxia Antidiuretic  
 hormone abnormality Antinuclear antibody positive Antisocial  
 behaviour Antisocial personality disorder Anxiety Aortic  
 dissection Apathy Aphasia Aphthous stomatitis Aplastic  
 anaemia Apnoea Appendicitis Application site reaction  
 Apraxia Arrhythmia Arrhythmia supraventricular Arterial  
 disorder Arterial occlusive disease Arterial stenosis  
 Arteriosclerosis Arteritis Arthralgia Arthritis Arthropathy  
 Ascites Asocial behaviour Aspartate aminotransferase  
 increased Asphyxia Aspiration Asthenia Asthma Ataxia  
 Atelectasis Athetosis Atrial fibrillation Atrial flutter  
 Atrioventricular block complete Atrioventricular block first  
 degree Atrophy Automatism Autonomic nervous system imbalance  
 Azotaemia Back pain Balance disorder Basophilia Benign  
 neoplasm Benign neoplasm of skin Benign prostatic hyperplasia  
 Bladder cancer Bladder dilatation Bladder pain  
 Blepharitis Blepharospasm Blindness Blister Blood  
 alkaline phosphatase increased Blood amylase increased Blood  
 antidiuretic hormone abnormal Blood bilirubin increased Blood  
 cholesterol increased Blood creatine phosphokinase increased Blood  
 creatinine increased Blood disorder Blood glucose decreased  
 Blood glucose increased Blood insulin increased Blood  
 iron decreased Blood lactate dehydrogenase increased Blood  
 potassium decreased Blood potassium increased Blood pressure  
 abnormal Blood pressure diastolic decreased Blood pressure  
 fluctuation Blood pressure increased Blood pressure systolic  
 decreased Blood prolactin increased Blood testosterone decreased  
 Blood triglycerides increased Blood triglycerides normal  
 Blood urea increased Blood uric acid increased Blood urine  
 Blood urine present Blunted affect Body temperature  
 decreased Body temperature increased Bone disorder Bone pain  
 Bone sarcoma Bradycardia Bradykinesia Bradyphrenia  
 Brain oedema Breast cancer Breast cyst Breast discharge  
 Breast discomfort Breast disorder Breast disorder female  
 Breast disorder male Breast engorgement Breast  
 enlargement Breast feeding Breast neoplasm Breast pain Breast  
 swelling Breast tenderness Breath odour Bronchitis  
 Bronchopneumonia Bronchopneumopathy Bronchospasm  
 Bruxism Buccoglossal syndrome Bundle branch block  
 Bundle branch block left Bundle branch block right  
 Burning sensation Bursitis Cachexia Calculus urinary  
 Cancer in remission Candidiasis Carbohydrate tolerance  
 decreased Cardiac arrest Cardiac disorder Cardiac failure  
 Cardiac failure congestive Cardiac fibrillation Cardiac  
 flutter Cardiac murmur Cardiac valve disease Cardio-  
 respiratory arrest Cardioactive drug level Cardiomegaly  
 Cardiomyopathy Cardiopulmonary failure Cardiovascular  
 disorder Carpal tunnel syndrome Cataplexy Cataract Catatonia  
 Cells in urine Cellulitis Cerebral haemorrhage Cerebral  
 infarction Cerebral ischaemia Cerebrospinal fluid rhinorrhoea  
 Cerebrovascular accident Cerebrovascular disorder  
 Cervicitis Cervix carcinoma Chapped lips Cheilitis Chest

discomfort Chest pain Chills Choking Cholecystitis  
Cholelithiasis Cholestasis Cholinergic syndrome Chorea  
Choreoathetosis Chronic obstructive pulmonary disease  
Coagulopathy Coccydynia Cognitive disorder Cogwheel  
rigidity Cold sweat Colitis ischaemic Colitis ulcerative  
Collagen disorder Coma Completed suicide Condition aggravated  
Confusional state Congenital eye disorder Conjunctival  
disorder Conjunctival follicles Conjunctival oedema  
Conjunctivitis Connective tissue disorder Constipation  
Conversion disorder Convulsion Coordination abnormal  
Corneal deposits Corneal erosion Corneal infiltrates  
Corneal lesion Corneal staining Coronary artery disease  
Costochondritis Cough Crocodile tears syndrome Crying  
Cyanosis Cystitis Cystitis noninfective Cytolytic  
hepatitis Dandruff Deafness Death Decreased appetite  
Decubitus ulcer Deep vein thrombosis Deficiency anaemia  
Dehydration Delirium Delusion Dementia Dementia with  
Lewy bodies Dental caries Dependence Depersonalisation Depressed  
level of consciousness Depression Depressive symptom  
Derealisation Dermal cyst Dermatitis Dermatitis atopic  
Dermatitis bullous Dermatitis contact Dermatitis  
exfoliative Dermatitis psoriasiform Diabetes mellitus Diabetic  
coma Diabetic hyperglycaemic coma Diabetic hyperosmolar coma  
Diabetic ketoacidosis Diarrhoea Diplopia Discomfort  
Disease progression Disorientation Disseminated  
intravascular coagulation Dissociation Disturbance in  
attention Disturbance in sexual arousal Diverticulitis  
Dizziness Dizziness exertional Dizziness postural  
Drooling Drug abuse Drug dependence Drug eruption Drug  
hypersensitivity Drug interaction Drug level increased Drug  
withdrawal syndrome Drug withdrawal syndrome neonatal Dry eye  
Dry mouth Dry skin Dry throat Duodenal ulcer Duodenitis  
Dysarthria Dysgeusia Dyskinesia Dysmenorrhoea Dyspepsia  
Dysphagia Dysphemia Dysphonia Dysphoria Dyspnoea  
Dystonia Dysuria Ear disorder Ear infection Ear  
pain Ecchymosis Eclampsia Eczema Effusion Ejaculation  
delayed Ejaculation disorder Ejaculation failure Elastosis  
perforans Elderly Electrocardiogram QRS complex  
Electrocardiogram QT prolonged Electrocardiogram ST segment  
Electrocardiogram ST segment depression Electrocardiogram ST  
segment elevation Electrocardiogram T wave inversion Electrocardiogram  
abnormal Electrocardiogram change Electrocardiogram normal  
Electroencephalogram abnormal Electrolyte imbalance  
Elevated mood Embolism Emphysema Encephalopathy  
Endocrine disorder Energy increased Enteritis Enuresis  
Eosinophil count increased Eosinophilia Epididymitis  
Epilepsy Epistaxis Erectile dysfunction Eructation  
Erythema Erythema multiforme Erythromelalgia Euphoric  
mood Exfoliative rash Exostosis Extensor plantar response  
Extrapyramidal disorder Extrasystoles Extravasation  
Eye discharge Eye disorder Eye haemorrhage Eye  
infection Eye inflammation Eye irritation Eye movement disorder  
Eye pain Eye pruritus Eye swelling Eyelid disorder  
Eyelid function disorder Eyelid oedema Eyelid ptosis  
Eyelid retraction Face oedema Facial pain Facial paresis



Faecal incontinence    Faecalith    Faecaloma    Faeces  
 discoloured Faeces hard Fasting    Fatigue    Fear    Feeling abnormal  
 Feeling cold    Feeling hot Feeling jittery    Female sexual  
 dysfunction Fibrocystic breast disease    Fibrosis    Flank pain Flat  
 affect    Flatulence Floppy iris syndrome    Fluid overload    Fluid  
 retention    Flushing    Foetor hepaticus Folliculitis    Formication  
 Fungal infection Fungal skin infection    Furuncle    Gait  
 disturbance Galactorrhoea    Gamma-glutamyltransferase increased  
 Gangrene    Gastric disorder Gastric pH decreased    Gastric  
 ulcer Gastric ulcer haemorrhage    Gastritis    Gastroenteritis  
 Gastrointestinal disorder    Gastrointestinal haemorrhage  
 Gastrointestinal obstruction Gastrointestinal pain  
 Gastrointestinal tract irritation Gastrooesophageal reflux  
 disease    Generalised oedema    Genital discharge Gestational  
 hypertension    Gingival bleeding Gingival pain    Gingival  
 recession    Gingivitis    Glaucoma    Glossitis    Glossodynia Glucose  
 tolerance decreased    Glucose tolerance impaired    Glycosuria  
 Glycosylated haemoglobin increased Goitre    Gout    Grand mal  
 convulsion Gravitational oedema    Groin pain Gynaecomastia  
 Haematemesis    Haematochezia    Haematocrit decreased  
 Haematoma    Haematuria Haemoglobin Haemoglobin decreased  
 Haemoglobin increased    Haemoglobinuria    Haemolysis    Haemolytic  
 anaemia    Haemoptysis Haemorrhage Haemorrhage intracranial  
 Haemorrhagic disorder    Haemorrhoids    Haemothorax Hair  
 disorder    Hallucination    Hallucination, auditory  
 Hallucination, visual Hangover    Head discomfort    Head  
 titubation Headache    Hearing impaired Heart disease congenital  
 Heart rate irregular    Hemiparesis Hemiplegia Hepatic cirrhosis  
 Hepatic enzyme increased    Hepatic failure    Hepatic function  
 abnormal    Hepatic necrosis Hepatic steatosis Hepatitis    Hepatitis A  
 Hepatitis cholestatic    Hepatobiliary disease    Hepatocellular  
 injury    Hepatomegaly    Hernia    Herpes simplex    Herpes  
 virus infection    Herpes zoster    Hiccups    High density  
 lipoprotein decreased    Hirsutism    Homicidal ideation    Hormone  
 level abnormal    Hostility    Hot flush    Hyperacusis Hyperaemia  
 Hyperaesthesia    Hyperbilirubinaemia    Hyperchloraemia  
 Hyperchlorhydria    Hypercholesterolaemia    Hyperglycaemia  
 Hyperhidrosis    Hyperinsulinism    Hyperkalaemia  
 Hyperkeratosis    Hyperkinesia    Hyperlipidaemia  
 Hypermagnesaemia    Hypernatraemia    Hyperparathyroidism  
 Hyperphosphataemia    Hyperplasia    Hyperprolactinaemia  
 Hyperpyrexia    Hyperreflexia    Hypersensitivity    Hypersomnia  
 Hypertension    Hyperthermia    Hyperthyroidism    Hypertonia  
 Hypertrichosis    Hypertriglyceridaemia    Hypertrophy  
 Hyperuricaemia    Hyperuricosuria    Hyperventilation  
 Hypoaesthesia    Hypoaesthesia oral    Hypocalcaemia  
 Hypochloraemia    Hypocholesterolaemia    Hypochromic anaemia  
 Hypoglycaemia    Hypogonadism    Hypohidrosis  
 Hypokalaemia    Hypokinesia Hypomagnesaemia    Hypomania  
 Hypomenorrhoea    Hyponatraemia    Hypophagia    Hypophosphataemia  
 Hypoproteinaemia    Hyporeflexia    Hypotension    Hypothermia  
 Hypothyroidism    Hypotonia    Hypoventilation    Hypovolaemia  
 Hypoxia    Idiopathic thrombocytopenic purpura    Ileus  
 paralytic    Ill-defined disorder    Immune system disorder  
 Inappropriate antidiuretic hormone secretion    Incontinence

Increased appetite      Induration    Infarction    Infection  
 Infestation    Inflammation      Influenza    Influenza like illness  
 Inguinal hernia    Initial insomnia    Injection site mass  
 Injection site pain    Injection site phlebitis    Injection  
 site reaction    Insomnia    Intention tremor    Intentional self-  
 injury      Intermittent claudication    Interstitial lung disease  
 Intervertebral disc disorder    Intestinal functional disorder  
 Intestinal obstruction    Intestinal perforation    Intracranial  
 pressure increased      Intraocular pressure increased      Iron  
 deficiency    Iron deficiency anaemia      Irritability      Irritable  
 bowel syndrome    Ischaemia    Ischaemic cardiomyopathy      Ischaemic  
 stroke      Jaundice    Jaundice cholestatic    Joint contracture    Joint  
 range of motion decreased      Joint stiffness    Joint swelling  
 Judgement impaired      Keratitis    Keratopathy    Ketoacidosis  
 Ketosis      Laboratory test abnormal      Lacrimation decreased  
 Lacrimation increased    Lactic acidosis    Laryngeal disorder  
 Laryngeal oedema    Laryngitis    Laryngospasm      Leiomyoma    Lens  
 disorder    Lenticular opacities    Lenticular pigmentation  
 Lethargy    Leukaemia    Leukocytoclastic vasculitis  
 Leukocytosis      Leukoderma    Leukopenia    Leukoplakia oral  
 Libido decreased    Libido increased    Lichen planus    Lichenoid  
 keratosis    Light anaesthesia    Lip blister    Lip dry      Lip swelling  
 Liver disorder    Liver function test abnormal    Liver injury  
 Local reaction    Localised infection      Localised oedema  
 Logorrhoea    Loss of consciousness    Loss of libido    Lower  
 respiratory tract infection    Lung adenocarcinoma stage I    Lung  
 disorder    Lung infiltration    Lung neoplasm malignant  
 Lymphadenitis      Lymphadenopathy    Lymphocytosis      Lymphoedema  
 Lymphopenia    Maculopathy    Major depression    Malaise      Male sexual  
 dysfunction    Malignant melanoma      Mania    Masked facies      Mastitis  
 Mediastinal disorder    Megacolon    Melaena      Memory impairment  
 Meningitis    Menopausal symptoms      Menopause    Menorrhagia  
 Menstrual disorder      Menstruation delayed    Menstruation  
 irregular    Mental disability    Mental disorder    Mental retardation  
 Mental status changes    Mesenteric artery thrombosis    Metabolic  
 disorder    Methaemoglobinaemia      Metrorrhagia      Micturition  
 disorder    Micturition urgency      Middle insomnia    Migraine  
 Miosis      Mitral valve incompetence      Mobility decreased  
 Monocytosis    Mood swings    Motion sickness    Mouth ulceration  
 Movement disorder    Muscle atrophy      Muscle contractions  
 involuntary    Muscle contracture      Muscle enzyme increased  
 Muscle relaxant therapy      Muscle rigidity    Muscle spasms  
 Muscle tightness    Muscle twitching    Muscular weakness  
 Musculoskeletal chest pain    Musculoskeletal discomfort  
 Musculoskeletal disorder      Musculoskeletal pain  
 Musculoskeletal stiffness    Myalgia      Myasthenic syndrome  
 Mydriasis    Myelitis    Myocardial infarction    Myocardial  
 ischaemia    Myocarditis    Myoclonus    Myopathy    Myopathy toxic  
 Myopia      Myositis    Nail discolouration    Nail disorder  
 Narcolepsy    Nasal congestion    Nasal discomfort    Nasal disorder  
 Nasal dryness    Nasal obstruction    Nasal oedema  
 Nasopharyngitis    Nausea      Neck pain    Necrosis      Neoplasm  
 Neoplasm malignant      Neoplasm recurrence      Nephritis  
 Nephrolithiasis    Nephrotic syndrome      Nervous system  
 disorder    Nervousness    Neuralgia    Neuritis      Neurodermatitis

Neuroleptic malignant syndrome      Neurological symptom  
 Neuropathy peripheral    Neurosis      Neutropenia    Neutrophil count  
 decreased    Neutrophil count increased    Night blindness    Night  
 sweats      Nightmare    Nocturia      Nodal arrhythmia    Nodule  
 Normochromic normocytic anaemia      Nuchal rigidity    Nystagmus  
 Obesity      Obsessive thoughts      Obstruction    Ocular hyperaemia  
 Oculogyric crisis    Oculomucocutaneous syndrome    Oedema  
 Oedema peripheral    Oesophageal achalasia    Oesophageal disorder  
 Oesophageal ulcer    Oesophagitis      Oligomenorrhoea    Oliguria  
 Onychomycosis      Opisthotonus      Oral candidiasis    Oral pain  
 Orchitis noninfective    Orgasm abnormal    Oropharyngeal  
 discomfort    Oropharyngeal pain      Oropharyngeal spasm    Orthostatic  
 hypotension    Osteoarthritis      Osteoarthropathy    Osteodystrophy  
 Osteomyelitis      Osteopenia    Osteoporosis      Otitis externa  
 Otitis media      Otitis media chronic    Ovarian cyst      Pain  
 Pain in extremity    Pain in jaw    Pain of skin      Pallor  
 Palpitations      Pancreatitis      Pancreatitis acute  
 Pancytopenia      Panic attack      Panic disorder    Panic  
 disorder with agoraphobia    Panic reaction    Paraesthesia  
 Paraesthesia oral    Paralysis    Paranoia      Paresis  
 Parkinsonian gait    Parkinsonism      Parosmia      Parotid gland  
 enlargement    Pathological fracture    Pathological gambling    Pelvic pain  
 Peptic ulcer      Pericardial effusion    Pericardial  
 haemorrhage    Pericarditis      Pericarditis constrictive    Perineal  
 pain    Periodontitis      Periorbital oedema      Peripheral coldness  
 Peripheral ischaemia    Peripheral vascular disorder    Personality  
 disorder    Petechiae    Petit mal epilepsy      Phaeochromocytoma  
 Pharyngeal disorder    Pharyngeal erythema    Pharyngitis  
 Phlebitis    Phlebitis superficial    Phobia      Phonological  
 disorder    Photophobia    Photopsia    Photosensitivity reaction  
 Pigmentation disorder    Piloerection      Pituitary tumour  
 benign      Platelet count decreased      Pleural disorder    Pleural  
 effusion    Pleural fibrosis    Pneumonia    Pneumonia aspiration  
 Pneumothorax      Poisoning    Pollakiuria    Polycythaemia  
 Polydipsia    Polymyalgia rheumatica    Polyp    Polyuria      Postural  
 orthostatic tachycardia syndrome    Posture abnormal    Pre-eclampsia  
 Precocious puberty      Pregnancy    Pregnancy test false  
 positive      Pregnancy test positive      Premature ejaculation  
 Premenstrual syndrome    Pressure of speech      Presyncope  
 Priapism      Procedural pain    Proctalgia    Productive cough  
 Prolactinoma      Prostatic disorder      Prostatism    Prostatitis  
 Protein urine present    Proteinuria    Prothrombin level decreased  
 Protrusion tongue    Pruritus      Pruritus generalised    Pruritus  
 genital      Psoriasis    Psychiatric symptom      Psychomotor  
 retardation    Psychotic disorder      Puberty      Pulmonary congestion  
 Pulmonary embolism      Pulmonary fibrosis      Pulmonary  
 function test decreased      Pulmonary hypertension    Pulmonary oedema  
 Pulse absent      Punctate keratitis      Purpura      Purpura  
 non-thrombocytopenic    Pyelonephritis    Pyuria      Rales    Rash    Rash  
 erythematous      Rash generalised    Rash maculo-papular      Rash  
 papular      Rash pustular      Rash vesicular    Raynaud's phenomenon  
 Rectal haemorrhage      Rectal tenesmus    Red blood cell count  
 decreased    Red blood cell sedimentation rate increased    Reflux  
 oesophagitis      Regressive behaviour    Renal artery stenosis    Renal  
 failure      Renal failure acute      Renal impairment    Renal pain

Respiratory alkalosis Respiratory arrest Respiratory  
 depression Respiratory disorder Respiratory distress Respiratory  
 failure Respiratory tract congestion Respiratory tract infection  
 Respiratory tract infection viral Restless legs syndrome  
 Retching Retinal artery occlusion Retinal detachment  
 Retinal disorder Retinal vascular disorder Retinal vein  
 occlusion Retinitis pigmentosa Retrograde ejaculation  
 Retroperitoneal fibrosis Rhabdomyolysis Rheumatoid  
 arthritis Rhinitis Rhinitis allergic Rhinitis seasonal Rhinorrhoea  
 Rhonchi Rosacea Salivary gland disorder Salivary  
 gland enlargement Salivary hypersecretion Salpingitis Sarcoidosis  
 Sarcoma Scab Schizoaffective disorder Schizophrenia  
 Schizophreniform disorder Sciatica Scleral disorder  
 Scotoma Seasonal allergy Seborrhoeic dermatitis Sedation  
 Semen analysis abnormal Sensation of foreign body  
 Sensation of heaviness Sensory loss Sepsis Septic  
 shock Severe acute respiratory syndrome Sexual dysfunction Shock  
 Sialoadenitis Sinus arrhythmia Sinus bradycardia Sinus  
 congestion Sinus disorder Sinus headache Sinus tachycardia  
 Sinusitis Skin cancer Skin discoloration Skin disorder  
 Skin exfoliation Skin hypertrophy Skin irritation Skin lesion  
 Skin mass Skin papilloma Skin ulcer Sleep apnoea syndrome  
 Sleep disorder Sleep paralysis Sleep talking  
 Sluggishness Small intestinal obstruction Sneezing  
 Social avoidant behaviour Somnambulism Somnolence  
 Speech disorder Splenomegaly Status epilepticus  
 Stevens-Johnson syndrome Sticky skin Stomatitis Stridor  
 Stupor Subarachnoid haemorrhage Subcutaneous abscess  
 Subcutaneous nodule Subdural haematoma Sudden death  
 Suicidal ideation Suicide attempt Superior sagittal sinus  
 thrombosis Supraventricular extrasystoles Supraventricular  
 tachycardia Surgery Suspiciousness Swelling Swelling face  
 Swollen tongue Syncope Synostosis Systemic lupus  
 erythematosus Tachycardia Tardive dyskinesia Tenderness  
 Tendinous contracture Tendon disorder Tendonitis  
 Tenosynovitis Tension Tension headache Teratogenicity  
 Testicular pain Testicular swelling Tetany Thinking  
 abnormal Thirst Thought blocking Throat tightness  
 Thrombocytopenia Thrombocytopenic purpura Thrombocytosis  
 Thrombophlebitis Thrombosis Thrombotic thrombocytopenic  
 purpura Thyroid adenoma Thyroiditis Tic Tinnitus Tongue  
 discoloration Tongue disorder Tongue dry Tongue oedema  
 Tongue paralysis Tongue spasm Tonsillar hypertrophy  
 Tonsillitis Tooth abscess Tooth disorder Tooth hypoplasia  
 Tooth impacted Tooth infection Toothache Torsade de  
 pointes Torticollis Toxic epidermal necrolysis Tracheobronchitis  
 Transaminases increased Transient ischaemic attack  
 Tremor Trismus Tuberculin test positive  
 Tubulointerstitial nephritis Ulcer Ulcer haemorrhage Unintended  
 pregnancy Unresponsive to stimuli Upper respiratory tract  
 infection Urethral disorder Urethral pain Urinary hesitation  
 Urinary incontinence Urinary retention Urinary tract disorder  
 Urinary tract infection Urine abnormality Urine analysis  
 abnormal Urine output increased Urosepsis Urticaria Uterine  
 disorder Uterine haemorrhage Uterine leiomyoma Uterovaginal

prolapse VIIth nerve paralysis Vaginal discharge Vaginal  
 haemorrhage Vaginal infection Vaginal inflammation Varicose vein  
 Vascular purpura Vasculitis Vasoconstriction Vasodilation  
 procedure Vasospasm Venous occlusion Venous thrombosis Ventricular  
 arrhythmia Ventricular extrasystoles Ventricular fibrillation  
 Ventricular tachycardia Vertigo Viral diarrhoea Viral  
 infection Vision blurred Visual acuity reduced Visual impairment  
 Vomiting Vulvovaginal candidiasis Vulvovaginal dryness  
 Vulvovaginal mycotic infection Vulvovaginal pruritus  
 Vulvovaginitis Water intoxication Weight decreased  
 Weight fluctuation Weight increased Wheezing White blood  
 cell count decreased White blood cell count increased White blood  
 cells urine positive Withdrawal bleed Withdrawal syndrome  
 Xerophthalmia Xerosis Yawning

\*\*\*\*\*  
 \*\*\*\*\*

B(0,+)-type amino acid transporter 1 - Group: Transporter  
 Treated with:

l-cystine: approved, nutraceutical small molecule (0 associated  
 side effects) It has been claimed that L-cysteine has anti-  
 inflammatory properties, that it can protect against various toxins,  
 and that it might be helpful in osteoarthritis and rheumatoid  
 arthritis. More research will have to be done before L-cysteine can  
 be indicated for any of these conditions. Research to date has  
 mostly been in animal models.

known side effects mediated through drugs targeting this protein:

\*\*\*\*\*  
 \*\*\*\*\*

Interleukin-2 receptor subunit beta - Group: Receptor  
 Treated with:

denileukin diftotox: approved biotech (0 associated side  
 effects) For treatment of cutaneous T-cell lymphoma  
 aldesleukin: approved biotech (0 associated side effects)  
 For treatment of adults with metastatic renal cell carcinoma.  
 basiliximab: approved biotech (0 associated side effects)  
 For prophylactic treatment of kidney transplant rejection  
 daclizumab: approved biotech (0 associated side effects)  
 Zenapax is a humanized monoclonal antibody used for prevention  
 of renal transplant rejection

known side effects mediated through drugs targeting this protein:

\*\*\*\*\*  
 \*\*\*\*\*

Intermediate conductance calcium-activated potassium channel protein  
 4 - Group: Channel  
 Treated with:

clotrimazole: approved small molecule (28 associated side  
 effects) For the local treatment of oropharyngeal candidiasis and  
 vaginal yeast infections, also used in fungal infections of the skin  
 such as ringworm, athlete's foot, and jock itch.  
 quinine: approved small molecule (0 associated side effects)  
 For the treatment of malaria and leg cramps

miconazole: approved small molecule (33 associated side effects)

For topical application in the treatment of tinea pedis (athlete&rsquo;s foot), tinea cruris, and tinea corporis caused by &lt;i&gt;Trichophyton rubrum&lt;/i&gt;, &lt;i&gt;Trichophyton mentagrophytes&lt;/i&gt;, and &lt;i&gt;Epidermophyton floccosum&lt;/i&gt;, in the treatment of cutaneous candidiasis (moniliasis), and in the treatment of tinea versicolor.

halothane: approved small molecule (10 associated side effects)

For the induction and maintenance of general anesthesia

59 known side effects mediated through drugs targeting this protein:

Abdominal distension Abdominal pain Anaphylactic shock  
Anaphylactoid reaction Angioedema Arrhythmia Aspartate  
aminotransferase increased Bladder pain Blister Breast  
disorder Burning sensation Cardiac arrest Cardiac disorder  
Chills Cystitis Cystitis noninfective Dermatitis  
Dermatitis bullous Dermatitis contact Erythema  
Flatulence Gastrointestinal pain Genital burning sensation  
Genital discharge Haemoglobin Haemorrhage Headache Hepatic  
function abnormal Hepatic necrosis Hyperpyrexia Hypotension  
Immune system disorder Liver function test abnormal Muscle  
spasms Nausea Necrosis Nervous system disorder  
Oedema Pain Pelvic pain Pollakiuria Pruritus Pruritus  
genital Rash Respiratory arrest Respiratory disorder  
Respiratory tract infection Skin exfoliation Skin irritation  
Upper respiratory tract infection Urethral disorder Urinary  
tract disorder Urinary tract infection Urticaria Vaginal  
discharge Vomiting Vulvovaginal burning sensation  
Vulvovaginal discomfort Vulvovaginal erythema

\*\*\*\*\*  
\*\*\*\*\*

Sodium- and chloride-dependent creatine transporter 1 - Group:  
Transporter

Treated with:

creatine: approved, nutraceutical small molecule (0 associated  
side effects) For nutritional supplementation, also for treating  
dietary shortage or imbalance

known side effects mediated through drugs targeting this protein:

\*\*\*\*\*  
\*\*\*\*\*

Membrane cofactor protein - Group: Receptor

Treated with:

alpha-d-mannose: experimental small molecule (0 associated  
side effects)

known side effects mediated through drugs targeting this protein:

\*\*\*\*\*  
\*\*\*\*\*

High affinity immunoglobulin gamma Fc receptor IB - Group: Receptor

Treated with:

intravenous immunoglobulin: approved biotech (0 associated  
side effects) IVIg is used in the treatment of

immunodeficiencies, as well as autoimmune and inflammatory disorders. These indications includes idiopathic thrombocytopenic purpura, Kawasaki disease, hypogammaglobulinemia, B cell chronic lymphocytic leukemia, bone marrow transplant complications, Guillain-Barré syndrome, chronic inflammatory demyelinating polyneuropathy (CIDP), multiple sclerosis, rheumatoid arthritis, myesthesia gravis, Wiskott-Aldrich syndrome and inflammatory skin diseases.

known side effects mediated through drugs targeting this protein:

\*\*\*\*\*  
\*\*\*\*\*

Metabotropic glutamate receptor 2 - Group: Receptor

Treated with:

acamprosate: approved small molecule (212 associated side effects) For the maintenance of abstinence from alcohol in patients with alcohol dependence who are abstinent at treatment initiation

212 known side effects mediated through drugs targeting this protein:

Abdominal distension Abdominal pain Abnormal dreams Abscess  
Acne Acute coronary syndrome Agitation Alanine  
aminotransferase increased Alcoholism Alopecia Amblyopia  
Amnesia Anaemia Angina pectoris Anxiety Apathy  
Arterial occlusive disease Arthralgia Arthritis Ascites  
Aspartate aminotransferase increased Asthenia Asthma  
Back pain Blindness Blister Blood alkaline phosphatase  
increased Blood creatinine increased Blood lactate dehydrogenase  
increased Blood uric acid increased Body temperature increased  
Bronchitis Cardiac failure Cardiomyopathy Chest pain  
Chills Cholecystitis Colitis Completed suicide  
Confusional stateConstipation Convulsion Cough Deafness  
Death Decreased appetite Deep vein thrombosis  
DepersonalisationDermatitis Dermatitis bullous Dermatitis  
exfoliativeDiabetes mellitusDiarrhoea Diplopia Discomfort  
Disturbance in sexual arousal Dizziness Dry mouth Dry  
skin Duodenal ulcer Dysgeusia Dyspepsia Dysphagia Dyspnoea  
Ecchymosis Eczema Ejaculation disorder Embolism  
Encephalopathy Endophthalmitis Eosinophilia Epistaxis  
Erectile dysfunction Eructation Face oedemaFeeling abnormal  
Flat affectFlatulence Gastric disorder Gastric ulcer  
Gastritis Gastroenteritis Gastrointestinal haemorrhage  
Gastrointestinal pain Goitre Gout Haematemesis  
Haematuria Haemoglobin Haemorrhage Hallucination Headache  
Hepatic cirrhosisHepatic neoplasm malignant Hepatitis  
Hernia Hostility Hyperbilirubinaemia Hyperglycaemia  
Hyperhidrosis Hyperkinesia Hypersensitivity  
Hypertension Hyperuricaemia Hypoaesthesia  
Hyponatraemia HypotensionHypothyroidism Hypovitaminosis  
Ill-defined disorder Incontinence Increased appetite  
Infarction Infection Influenza Insomnia Laryngospasm  
Leukopenia Libido decreased Libido increased Liver function  
test abnormal Loss of consciousness Lymphadenopathy

Lymphocytosis      Malaise      Mania Melaena      Menorrhagia  
 Mental disability Mesenteric occlusion      Metrorrhagia  
 Micturition urgency      Migraine      Monocytosis Mouth ulceration  
 Muscle spasms      Muscle twitching      Musculoskeletal discomfort  
 Myalgia      Myocardial infarction      Myopathy      Nausea      Neck  
 pain Neoplasm malignant      Nephrolithiasis      Nervousness Neuralgia  
 Neurosis      Nocturia      Oedema      Oedema peripheral  
 Oesophagitis      Orthostatic hypotension      Pain  
 Palpitations      Pancreatitis      Panophthalmitis  
 Paraesthesia      Paranoia      Pharyngitis Phlebitis      Photophobia  
 Photosensitivity reaction      Pneumonia      Pollakiuria Polyuria  
 Pruritus      Psoriasis      Psychotic disorder      Pulmonary  
 embolism      Rash      Rash maculo-papular      Rash pustular      Rectal  
 haemorrhage Renal failure      Renal failure acute      Rheumatoid  
 arthritis Rhinitis      Salivary hypersecretion      Sexual  
 dysfunction Shock Somnolence Stomatitis      Sudden death      Suicidal  
 ideation      Suicide attempt      Syncope      Tachycardia Tension  
 Thinking abnormal Thirst      Thrombocytopenia Thrombophlebitis  
 Tinnitus      Torticollis Tremor      Ulcer Urinary incontinence  
 Urinary tract infection      Urine output increased Urticaria  
 Vaginal infection Vaginal inflammation      Varicose vein  
 Vasodilation procedure Vertigo      Visual acuity reduced  
 Visual impairment Vomiting      Weight decreased Weight increased  
 Withdrawal syndrome

\*\*\*\*\*  
 \*\*\*\*\*

Somatostatin receptor type 2 - Group: Receptor

Treated with:

octreotide: approved      small molecule      (0 associated side effects)  
 For treatment of acromegaly and reduction of side effects from  
 cancer chemotherapy

vapreotide: approved      small molecule      (0 associated side effects)  
 For the treatment of esophageal variceal bleeding in patients  
 with cirrhotic liver disease and has also shown efficacy in the  
 treatment of patients with AIDS-related diarrhea.

known side effects mediated through drugs targeting this protein:

\*\*\*\*\*  
 \*\*\*\*\*

Gamma-aminobutyric-acid receptor subunit rho-1 - Group: Channel

Treated with:

lorazepam: approved      small molecule      (126 associated side  
 effects)      For the management of anxiety disorders, and for  
 treatment of status epilepticus.

temazepam: approved      small molecule      (35 associated side effects)  
 For the short-term treatment of insomnia (generally 7-10  
 days).

clobazam: illicit, approved small molecule      (58 associated side  
 effects)      For treatment and management of epilepsy and anxiety  
 disorder.

alprazolam: illicit, approved small molecule      (178 associated side  
 effects)      For the management of anxiety disorder or the short-term  
 relief of symptoms of anxiety and for the treatment of panic  
 disorder, with or without agoraphobia.



picROTOXIN: approved small molecule (0 associated side effects)  
Used internally for relieving respiratory distress. Also for use as an antidote in poisoning by CNS depressants, especially barbiturates.

chlORDIAZEPoxide: illicit, approved small molecule (20 associated side effects)  
For the management of anxiety disorders or for the short-term relief of symptoms of anxiety, withdrawal symptoms of acute alcoholism, and preoperative apprehension and anxiety.

adinAZOLAM: approved small molecule (0 associated side effects)  
For the treatment of anxiety and status epilepticus.

clORAZEPate: illicit, approved small molecule (0 associated side effects)  
For the management of anxiety disorders or for the short-term relief of the symptoms of anxiety. Also used as adjunctive therapy in the management of partial seizures and for the symptomatic relief of acute alcohol withdrawal.

midAZOLAM: illicit, approved small molecule (119 associated side effects)  
For use as a sedative perioperatively.

flURAZEPAM: illicit, approved small molecule (62 associated side effects)  
For short-term and intermittent use in patients with recurring insomnia and poor sleeping habits

halAZEPAM: illicit, approved small molecule (0 associated side effects)  
Used to relieve anxiety, nervousness, and tension associated with anxiety disorders.

diAZEPAM: illicit, approved small molecule (149 associated side effects)  
Used in the treatment of severe anxiety disorders, as a hypnotic in the short-term management of insomnia, as a sedative and premedicant, as an anticonvulsant, and in the management of alcohol withdrawal syndrome.

oxAZEPAM: approved small molecule (36 associated side effects)  
For the treatment of anxiety disorders and alcohol withdrawal.

triAZOLAM: illicit, approved, withdrawn small molecule (66 associated side effects)  
For the short-term treatment of insomnia.

clONAZEPAM: illicit, approved small molecule (228 associated side effects)  
Used as an anticonvulsant in the treatment of the Lennox-Gastaut syndrome (petit mal variant), akinetic and myoclonic seizures.

estAZOLAM: illicit, approved small molecule (131 associated side effects)  
For the short-term management of insomnia characterized by difficulty in falling asleep, frequent nocturnal awakenings, and/or early morning awakenings.

bromAZEPAM: illicit, approved small molecule (47 associated side effects)  
For the short-term treatment of insomnia, short-term treatment of anxiety or panic attacks, if a benzodiazepine is required, and the alleviation of the symptoms of alcohol- and opiate-withdrawal.

clOTIAZEPAM: illicit, approved small molecule (0 associated side effects)  
For the treatment of anxiety disorders.

flUDIAZEPAM: illicit, approved small molecule (0 associated side effects)  
Used for the short-term treatment of anxiety disorders.

prAZEPAM: illicit, approved small molecule (0 associated side effects)  
For the treatment of anxiety disorders.

quAZEPAM: illicit, approved small molecule (0 associated side effects)  
Used to treat insomnia.

cinolazepam: approved small molecule (0 associated side effects) For the management of anxiety disorders or for the short-term relief of the symptoms of anxiety or anxiety associated with depressive symptoms.

nitrazepam: approved small molecule (44 associated side effects)  
Used to treat short-term sleeping problems (insomnia), such as difficulty falling asleep, frequent awakenings during the night, and early-morning awakening.

486 known side effects mediated through drugs targeting this protein:

Abdominal discomfort Abdominal distension Abdominal pain  
Abnormal dreams Abnormal faeces Acidosis Acne Affect  
labiality Ageusia Aggression Agitation Agranulocytosis  
Akathisia Akinesia Alcohol poisoning Alopecia Altered  
state of consciousness Amblyopia Amnesia Anaemia  
Anaphylactic shock Anaphylactoid reaction Anger Angioedema  
Angiopathy Anorectal discomfort Anorectal disorder  
Anterograde amnesia Anxiety Aortic dissection Apathy  
Aphonia Apnoea Appetite disorder Arrhythmia Arterial  
spasm Arthralgia Arthritis Aspartate aminotransferase increased  
Aspiration Asthenia Asthma Ataxia Athetosis  
Atrioventricular block Back pain Balance disorder Bladder  
dysfunction Bladder pain Blindness Blood alkaline phosphatase  
increased Blood bilirubin increased Blood disorder Blood  
glucose decreased Blood thromboplastin decreased Body temperature  
decreased Body temperature increased Borderline personality  
disorder Bradycardia Bradyphrenia Brain oedema Breast  
disorder Breast pain Breast swelling Bronchitis Bronchospasm  
Candidiasis Carbon dioxide increased Cardiac arrest  
Cardiac disorder Cardiac failure Cardio-respiratory arrest  
Cardiovascular disorder Cellulitis Cerebellar syndrome  
Chest discomfort Chest pain Chills Choking sensation  
Chorea Chromaturia Clonic convulsion Clonus Clumsiness  
Coagulopathy Cognitive disorder Coma Completed suicide  
Confusional state Connective tissue disorder Constipation  
Conversion disorder Convulsion Coordination abnormal Cough  
Cyanosis Cystitis Cystitis noninfective Cytolytic  
hepatitis Deafness Death Decreased appetite Dehydration  
Delirium Delirium tremens Delusion Dependence  
Depersonalisation Depressed level of consciousness Depressed  
mood Depression Depressive symptom Derealisation Dermatitis  
Dermatitis contact Dermatitis exfoliative Diarrhoea  
Diplopia Discomfort Disinhibition Disorientation  
Disturbance in attention Disturbance in sexual arousal  
Dizziness Drooling Drug abuse Drug dependence Drug  
eruption Drug intolerance Drug withdrawal convulsions Dry mouth  
Dry skin Dysaesthesia Dysarthria Dysgeusia Dyskinesia  
Dysmenorrhoea Dyspepsia Dysphagia Dysphonia Dysphoria  
Dyspnoea Dysthymic disorder Dystonia Dysuria Ear  
infection Ear pain Ecchymosis Effusion Ejaculation delayed  
Ejaculation failure Emotional disorder Emotional  
distress Emotional poverty Encephalopathy Encopresis Endometrial  
sarcoma Energy increased Enterocolitis Enuresis  
Eosinophilia Epilepsy Epistaxis Erectile dysfunction

Erythema Erythema multiforme Euphoric mood  
Extrapyramidal disorder Extrasystoles Eye disorder  
Eye irritation Eye movement disorder Eye pain Eye  
swelling Face oedema Faecal incontinence Fatigue Feeling  
abnormal Feeling cold Feeling drunk Feeling hot Feeling  
jittery Feeling of body temperature change Flat affect Flatulence  
Floppy infant Flushing Fungal infection Gait disturbance  
Galactorrhoea Gangrene Gastric disorder Gastritis  
Gastrointestinal disorder Gastrointestinal haemorrhage  
Gastrointestinal pain Gingival pain Glossitis Glossodynia  
Gout Grand mal convulsion Gynaecomastia Haematoma  
Haematuria Haemoglobin Haemoglobin decreased Haemorrhage  
Haemorrhage urinary tract Haemorrhoids Hallucination  
Hangover Headache Hearing impaired Heart rate irregular  
Hemiparesis Hepatic enzyme increased Hepatic failure  
Hepatic function abnormal Hepatitis Hepatocellular injury  
Hepatomegaly Herpes simplex Herpes virus infection  
Hiccups Hirsutism Homicidal ideation Hordeolum  
Hostility Hunger Hypercapnia Hyperhidrosis  
Hyperkinesia Hyperprolactinaemia Hypersensitivity  
Hypersomnia Hypertension Hypertonia Hyperventilation  
Hypoesthesia Hypochromic anaemia Hypokinesia Hypomania  
Hyponatraemia Hypopnoea Hyporeflexia Hypotension  
Hypothermia Hypotonia Hypoventilation Hypoxia Ill-defined  
disorder Illusion Inappropriate antidiuretic hormone secretion  
Incontinence Increased appetite Induration Infection  
Infectious mononucleosis Infestation Inflammation  
Influenza Injection site pain Injection site reaction  
Insomnia Intraocular pressure increased Irritability  
Jaundice Joint swelling Laryngitis Laryngospasm  
Lethargy Leukocytosis Leukopenia Libido decreased  
Libido increased Liver function test abnormal Liver injury  
Local reaction Logorrhoea Loss of consciousness Loss of  
libido Lung disorder Lymphadenopathy Major depression  
Malaise Mania Mean arterial pressure Mediastinal disorder  
Melaena Memory impairment Menstrual disorder  
Menstruation irregular Mental disability Mental disorder  
Mental retardation Micturition urgency Migraine  
Miosis Mood swings Motion sickness Movement disorder  
Muscle relaxant therapy Muscle rigidity Muscle spasms  
Muscle spasticity Muscle twitching Muscular weakness  
Musculoskeletal discomfort Musculoskeletal disorder  
Musculoskeletal stiffness Myalgia Mydriasis Myoclonus  
Nasal congestion Nasopharyngitis Nausea Neck pain  
Necrosis Nervous system disorder Nervousness Neuritis  
Neuroleptic malignant syndrome Neuropathy peripheral  
Neutropenia Nightmare Nocturia Nodal rhythm Nodule  
Nystagmus Obstruction Obstructive airways disorder Oedema  
Oedema peripheral Oliguria Oropharyngeal pain Orthostatic  
hypotension Osteoarthritis Otitis media Pain Pain in extremity  
Pain in jaw Pallor Palpitations Pancytopenia  
Paraesthesia Paraesthesia oral Paralysis Paresis  
Pelvic pain Penile discharge Pericardial effusion Periorbital  
oedema Personality disorder Phaeochromocytoma Pharyngitis  
Phlebitis Photophobia Photosensitivity reaction

Pigmentation disorder Platelet count decreased Pleurisy  
 Pneumonia Pneumothorax Pollakiuria Polyuria Post-  
 traumatic stress disorder Precocious puberty Premenstrual  
 syndrome Presyncope Proctalgia Prothrombin level increased  
 Pruritus Psychomotor retardation Psychotic disorder  
 Puberty Pulmonary congestion Pulmonary function test  
 decreased Pulmonary haemorrhage Pulmonary hypertension Pulmonary  
 oedema Purpura Rash Rash maculo-papular Rectal  
 haemorrhage Rectal tenesmus Renal failure Respiratory arrest  
 Respiratory depression Respiratory disorder Respiratory  
 failure Respiratory moniliasis Respiratory rate decreased  
 Respiratory tract congestion Respiratory tract infection  
 Retching Retrograde amnesia Rhinitis allergic Rhinorrhoea  
 Rhonchi Salivary hypersecretion Scotoma Sedation  
 Sexual dysfunction Shock Sinus tachycardia Sinusitis Skin  
 burning sensation Skin discolouration Skin disorder Skin  
 exfoliation Skin necrosis Sleep apnoea syndrome Sleep disorder  
 Sleep talking Sluggishness Sneezing Somnambulism  
 Somnolence Speech disorder Stevens-Johnson syndrome  
 Stomatitis Strabismus Stridor Stupor Substance abuse  
 Suicidal ideation Swelling Swelling face Swollen tongue  
 Syncope Tachycardia Tachypnoea Tenderness Tendonitis  
 Tension Therapeutic response decreased Thinking abnormal  
 Thirst Thrombocytopenia Thrombocytosis Thrombophlebitis  
 Thrombosis Thyroid neoplasm Tinnitus Tongue coated  
 Tongue disorder Tongue oedema Tooth disorder Toothache  
 Toxic epidermal necrolysis Transaminases increased  
 Tremor Tropical spastic paresis Ulcer Upper airway  
 obstruction Upper respiratory tract infection Urethral disorder  
 Urinary hesitation Urinary incontinence Urinary retention  
 Urinary tract disorder Urinary tract infection Urine  
 colour abnormal Urine output increased Urticaria Vaginal discharge  
 Vaginal infection Vaginal inflammation Vascular purpura  
 Vasodilation procedure Venous thrombosis Ventricular arrhythmia  
 Ventricular extrasystoles Vertigo Viral infection  
 Vision blurred Visual acuity reduced Visual impairment  
 Vomiting Weight decreased Weight increased Wheezing  
 Withdrawal syndrome Xeroderma Xerophthalmia Yawning

\*\*\*\*\*  
 \*\*\*\*\*

Neutral amino acid transporter B(0) - Group: Transporter

Treated with:

- l-glutamine: approved, nutraceutical small molecule (0 associated side effects) Used for nutritional supplementation, also for treating dietary shortage or imbalance.
- l-asparagine: approved, nutraceutical small molecule (0 associated side effects) Used for nutritional supplementation, also for treating dietary shortage or imbalance.

known side effects mediated through drugs targeting this protein:

\*\*\*\*\*  
 \*\*\*\*\*

Alpha-1B adrenergic receptor - Group: Receptor

Treated with:

midodrine: approved small molecule (44 associated side effects)

For the treatment of symptomatic orthostatic hypotension (OH).

ziprasidone: approved small molecule (251 associated side effects) For the treatment of schizophrenia and related psychotic disorders.

dapiprazole: approved small molecule (0 associated side effects) Used in the treatment of iatrogenically induced mydriasis produced by adrenergic (phenylephrine) or parasympatholytic (tropicamide) agents used in certain eye examinations.

olanzapine: approved small molecule (393 associated side effects) For the acute and maintenance treatment of schizophrenia and related psychotic disorders, as well as acute treatment of manic or mixed episodes of bipolar 1 disorder. Intramuscular olanzapine is indicated for the rapid control of agitated patients.

alfuzosin: approved small molecule (92 associated side effects)

For the reduction of urinary obstruction and relief of associated manifestations (eg. sensation of incomplete bladder emptying or straining, urgency, interrupted or weak stream) in patients with symptomatic benign prostatic hyperplasia.

clozapine: approved small molecule (228 associated side effects) For use in patients with treatment-resistant schizophrenia.

norepinephrine: approved small molecule (22 associated side effects) Mainly used to treat patients in vasodilatory shock states such as septic shock and neurogenic shock and has shown a survival benefit over dopamine. Also used as a vasopressor medication for patients with critical hypotension.

promazine: approved small molecule (0 associated side effects)

Used as an adjunct for short term treatment of moderate and severe psychomotor agitation. Also used to treat agitation or restlessness in the elderly.

prazosin: approved small molecule (93 associated side effects)

For treatment of hypertension, symptomatic benign prostatic hyperplasia, and severe congestive heart failure. May also be used alone or in combination with  $\beta$ -blockers in the preoperative management of signs and symptoms of pheochromocytoma.

chlorpromazine: approved small molecule (111 associated side effects) For the treatment of schizophrenia, control nausea and vomiting, For relief of restlessness and apprehension before surgery, adjunct in the treatment of tetanus, control the manifestations of the manic type of manic-depressive illness.

doxazosin: approved small molecule (243 associated side effects) For treatment and management of mild to moderate hypertension and urinary obstruction symptoms caused by BPH.

labetalol: approved small molecule (103 associated side effects) For the management of hypertension (alone or in combination with other classes of antihypertensive agents), as well as chronic stable angina pectoris and sympathetic overactivity syndrome associated with severe tetanus. Labetalol is used parenterally for immediate reduction in blood pressure in severe hypertension or in hypertensive crises when considered an emergency, for the control of blood pressure in patients with pheochromocytoma and pregnant women with preeclampsia, and to produce controlled hypotension during anesthesia to reduce bleeding resulting from surgical procedures.

nicardipine: approved small molecule (107 associated side effects) Used for the management of patients with chronic stable angina and for the treatment of hypertension.

thioridazine: approved small molecule (92 associated side effects) For the treatment of schizophrenia and generalized anxiety disorder.

ergotamine: approved small molecule (15 associated side effects) For use as therapy to abort or prevent vascular headache, e.g., migraine, migraine variants, or so called "histaminic cephalalgia".

tamsulosin: approved small molecule (79 associated side effects) Used in the treatment of signs and symptoms of benign prostatic hyperplasia (reduction in urinary obstruction and relief of associated manifestations such as hesitancy, terminal dribbling of urine, interrupted or weak stream...etc.)

methoxamine: approved small molecule (0 associated side effects) Indicated for the treatment and management of hypotension.

trimipramine: approved small molecule (0 associated side effects) For the treatment of depression and depression accompanied by anxiety, agitation or sleep disturbance

risperidone: approved small molecule (532 associated side effects) For the treatment of schizophrenia in adults and in adolescents, ages 13 to 17, and for the short-term treatment of manic or mixed episodes of bipolar I disorder in children and adolescents ages 10 to 17. May also be used to manage symptoms of inappropriate behavior due to aggression and/or psychosis in patients with severe dementia.

modafinil: approved small molecule (170 associated side effects) To improve wakefulness in patients with excessive daytime sleepiness (EDS) associated with narcolepsy.

propiomazine: approved small molecule (0 associated side effects) Propiomazine is largely used for its antihistaminic sleep inducing effects in treating insomnia.

doxepin: approved small molecule (210 associated side effects) Labeled indications: depression and insomnia. Unlabeled indications: chronic and neuropathic pain, anxiety, idiopathic urticaria.

nefazodone: approved, withdrawn small molecule (246 associated side effects) For the treatment of depression.

terazosin: approved small molecule (115 associated side effects) For the treatment of symptomatic BPH and mild to moderate hypertension.

pergolide: approved, withdrawn small molecule (354 associated side effects) Indicated as adjunctive treatment to levodopa/carbidopa in the management of the signs and symptoms of Parkinson's disease. It was withdrawn from the US and Canadian markets in 2007 due to an increased risk of cardiac valvulopathy.

bromocriptine: approved small molecule (120 associated side effects) For the treatment of galactorrhea due to hyperprolactinemia, prolactin-dependent menstrual disorders and infertility, prolactin-secreting adenomas, prolactin-dependent male hypogonadism, as adjunct therapy to surgery or radiotherapy for acromegaly or as monotherapy in special cases, as monotherapy in early Parkinsonian Syndrome or as an adjunct with levodopa in

advanced cases with motor complications. Bromocriptine has also been used off-label to treat restless legs syndrome and neuroleptic malignant syndrome.

quetiapine: approved small molecule (359 associated side effects) For the treatment of schizophrenia and related psychotic disorders.

aripiprazole: approved small molecule (630 associated side effects) For the treatment of schizophrenia and related psychotic disorders.

lisdexamfetamine: approved small molecule (0 associated side effects) For the treatment of Attention Deficit/Hyperactivity Disorder (ADHD) in pediatric populations aged 6 to 12 years.

paliperidone: approved small molecule (216 associated side effects) For the treatment of schizophrenia.

methotrimeprazine: approved small molecule (0 associated side effects) For the treatment of psychosis, particular those of schizophrenia, and manic phases of bipolar disorder.

dextroamphetamine: illicit, approved small molecule (0 associated side effects) Used to treat attention deficit hyperactivity disorder (ADHD).

phendimetrazine: illicit, approved small molecule (0 associated side effects) Used in the management of exogenous obesity as a short term adjunct (a few weeks) in a regimen of weight reduction based on caloric restriction.

propericiazine: approved small molecule (0 associated side effects) For use as adjunctive medication in some psychotic patients. Propericiazine (Pericyazine) is used for the control of residual prevailing hostility, impulsiveness and aggressiveness.

acepromazine: approved small molecule (0 associated side effects) Acepromazine was first used in humans in the 1950s as an antipsychotic agent. It is now rarely used in humans. Acepromazine is frequently used in animals as a sedative and antiemetic. Its principal value is in quietening and calming anxious animals.

thiopropazine: approved small molecule (0 associated side effects) For the treatment of all types of acute and chronic schizophrenia, including those which did not respond to the usual neuroleptics; manic syndromes.

sertindole: approved, withdrawn small molecule (0 associated side effects) Used in the treatment of schizophrenia.

droxidopa: approved small molecule (0 associated side effects)

For treatment of neurogenic orthostatic hypotension (NOH) associated with various disorders including Multiple System Atrophy, Familial Amyloid Polyneuropathy, hemodialysis induced hypotension and Parkinson's Disease. Also investigated for use/treatment in neurologic disorders, nephropathy, blood (blood forming organ disorders, unspecified), and dizzy/fainting spells.

xylometazoline: approved small molecule (0 associated side effects) It is used for treating nasal congestion and minor inflammation due to allergies or colds.

1109 known side effects mediated through drugs targeting this protein:

Abasia      Abdominal discomfort      Abdominal distension      Abdominal pain  
Abdominal pain lower      Abdominal pain upper      Abdominal tenderness  
Abnormal dreams      Abnormal faeces      Abscess

Accommodation disorder Acidosis Acne Acute abdomen Acute  
 coronary syndrome Acute lymphocytic leukaemia Acute psychosis  
 Adenocarcinoma Adenoma benign Adjustment disorder  
 Affect lability Affective disorder Ageusia Aggression  
 Agitation Agoraphobia Agranulocytosis Akathisia Akinesia  
 Alanine aminotransferase increased Albright's disease  
 Albuminuria Alcohol intolerance Alkalosis Alopecia  
 Altered state of consciousness Amblyopia Amenorrhoea  
 Amnesia Anaemia Anaemia macrocytic Anaemia  
 megaloblastic Anaphylactic shock Anaphylactoid reaction  
 Aneurysm Anger Angina pectoris Angioedema Angiopathy Angle  
 closure glaucoma Anorectal discomfort Anorgasmia Anoxia  
 Antidiuretic hormone abnormality Antinuclear antibody  
 positive Antisocial behaviour Antisocial personality disorder  
 Anxiety Aortic dissection Apathy Aphasia Aphthous  
 stomatitis Aplastic anaemia Apnoea Appendicitis Application  
 site reaction Apraxia Arrhythmia Arterial disorder Arterial  
 occlusive disease Arteriosclerosis Arteritis Arthralgia Arthritis  
 Arthropathy Ascites Asocial behaviour Aspartate  
 aminotransferase increased Asphyxia Aspiration Asthenia  
 Asthma Ataxia Atelectasis Atrial fibrillation  
 Atrial flutter Atrioventricular block first degree  
 Atrophy Automatism Autonomic nervous system imbalance  
 Azotaemia Back pain Balance disorder Basophilia Benign  
 neoplasm Benign neoplasm of skin Benign prostatic hyperplasia  
 Bladder cancer Bladder pain Blepharitis Blepharospasm  
 Blindness Blister Blood alkaline phosphatase increased  
 Blood antidiuretic hormone abnormal Blood bilirubin  
 increased Blood cholesterol increased Blood creatine phosphokinase  
 increased Blood creatinine increased Blood disorder Blood  
 glucose decreased Blood glucose increased Blood insulin  
 increased Blood iron decreased Blood lactate dehydrogenase  
 increased Blood potassium decreased Blood potassium increased  
 Blood pressure abnormal Blood pressure diastolic decreased  
 Blood pressure fluctuation Blood pressure increased Blood  
 pressure systolic decreased Blood prolactin increased Blood  
 testosterone decreased Blood triglycerides increased Blood  
 triglycerides normal Blood urea increased Blood uric acid  
 increased Blood urine Blood urine present Blunted affect Body  
 temperature decreased Body temperature increased Bone disorder  
 Bone pain Bone sarcoma Bradycardia Bradykinesia  
 Bradyphrenia Brain oedema Breast cancer Breast cyst  
 Breast discharge Breast discomfort Breast disorder Breast  
 disorder female Breast disorder male Breast engorgement  
 Breast enlargement Breast feeding Breast neoplasm  
 Breast pain Breast swelling Breast tenderness Breath odour  
 Bronchitis Bronchopneumonia Bronchopneumopathy  
 Bronchospasm Bruxism Buccoglossal syndrome Bundle  
 branch block Bundle branch block left Bundle branch block  
 right Burning sensation Bursitis Cachexia Calculus urinary  
 Cancer in remission Candidiasis Carbohydrate tolerance  
 decreased Cardiac arrest Cardiac disorder Cardiac failure  
 Cardiac failure congestive Cardiac fibrillation Cardiac  
 flutter Cardiac murmur Cardiac valve disease Cardio-  
 respiratory arrest Cardiomegaly Cardiomyopathy



Cardiopulmonary failure      Cardiovascular disorder  
 Carpal tunnel syndrome      Cataplexy      Cataract      Catatonia      Cells  
 in urine      Cellulitis      Cerebral haemorrhage      Cerebral infarction  
 Cerebral ischaemia      Cerebrospinal fluid rhinorrhoea  
 Cerebrovascular accident      Cerebrovascular disorder  
 Cervicitis      Cervix carcinoma      Chapped lips      Cheilitis      Chest  
 discomfort      Chest pain      Chills      Choking      Cholecystitis  
 Cholelithiasis      Cholestasis      Chorea      Choreoathetosis  
 Chronic obstructive pulmonary disease      Coagulopathy  
 Coccydynia      Cognitive disorder      Cogwheel rigidity      Cold sweat  
 Colitis ischaemic      Colitis ulcerative      Collagen disorder      Coma  
 Completed suicide      Condition aggravated      Confusional state  
 Congenital eye disorder      Conjunctival disorder  
 Conjunctivitis      Connective tissue disorder      Constipation  
 Convulsion      Coordination abnormal      Corneal lesion      Coronary  
 artery disease      Costochondritis      Cough      Crocodile tears syndrome  
 Crying      Cyanosis      Cystitis      Cystitis noninfective  
 Cytolytic hepatitis      Dandruff      Deafness      Death      Decreased  
 appetite      Decubitus ulcer      Deep vein thrombosis      Deficiency  
 anaemia      Dehydration      Delirium      Delusion      Dementia      Dementia  
 with Lewy bodies      Dental caries      Dependence      Depersonalisation  
 Depressed level of consciousness      Depressed mood      Depression  
 Depressive symptom      Derealisation      Dermal cyst      Dermatitis  
 Dermatitis atopic      Dermatitis bullous      Dermatitis contact  
 Dermatitis exfoliative      Diabetes mellitus      Diabetic coma  
 Diabetic hyperglycaemic coma      Diabetic hyperosmolar coma  
 Diabetic ketoacidosis      Diarrhoea      Diplopia      Discomfort  
 Disease progression      Disorientation      Disseminated  
 intravascular coagulation      Dissociation      Disturbance in  
 attention      Disturbance in sexual arousal      Diverticulitis  
 Dizziness      Dizziness exertional      Dizziness postural  
 Drooling      Drug abuse      Drug dependence      Drug eruption      Drug  
 hypersensitivity      Drug interaction      Drug withdrawal syndrome      Drug  
 withdrawal syndrome      neonatal      Dry eye      Dry mouth      Dry skin      Dry  
 throat      Duodenal ulcer      Duodenitis      Dysarthria      Dysgeusia  
 Dyskinesia      Dysmenorrhoea      Dyspepsia      Dysphagia      Dysphemia  
 Dysphonia      Dysphoria      Dyspnoea      Dystonia      Dysuria      Ear  
 disorder      Ear infection      Ear pain      Ecchymosis      Eclampsia  
 Eczema      Effusion      Ejaculation delayed      Ejaculation  
 disorder      Ejaculation failure      Elastosis perforans      Elderly  
 Electrocardiogram QRS complex      Electrocardiogram QT  
 prolonged      Electrocardiogram ST segment      Electrocardiogram ST segment  
 depression      Electrocardiogram ST segment elevation      Electrocardiogram  
 T wave inversion      Electrocardiogram abnormal      Electrocardiogram  
 change      Electrocardiogram normal      Electroencephalogram  
 abnormal      Electrolyte imbalance      Elevated mood      Embolism  
 Emphysema      Encephalopathy      Endocrine disorder      Energy  
 increased      Enteritis      Enuresis      Eosinophil count increased  
 Eosinophilia      Epididymitis      Epilepsy      Epistaxis  
 Erectile dysfunction      Eructation      Erythema      Erythema  
 multiforme      Erythromelalgia      Euphoric mood      Exfoliative rash  
 Exostosis      Extrapyrarnidal disorder      Extrasystoles  
 Extravasation      Eye discharge      Eye disorder      Eye  
 haemorrhage      Eye infection      Eye inflammation      Eye irritation      Eye  
 movement disorder      Eye pain      Eye swelling      Eyelid disorder

Eyelid function disorder      Eyelid oedema      Eyelid ptosis  
 Face oedema Facial pain Facial paresis      Faecal incontinence  
 Faecalith      Faecaloma      Faeces discoloured      Faeces hard  
 Fasting      Fatigue      Fear      Feeling abnormal      Feeling cold  
 Feeling hot Feeling jittery      Female sexual dysfunction  
 Fibrocystic breast disease      Fibrosis      Flank pain      Flat affect  
 Flatulence Floppy iris syndrome      Fluid retention      Flushing  
 Foetor hepaticus Folliculitis      Formication Fungal infection  
 Fungal skin infection      Furuncle      Gait disturbance  
 Galactorrhoea      Gamma-glutamyltransferase increased  
 Gangrene      Gastric disorder      Gastric pH decreased      Gastric  
 ulcer      Gastric ulcer haemorrhage      Gastritis      Gastroenteritis  
 Gastrointestinal disorder      Gastrointestinal haemorrhage  
 Gastrointestinal obstruction      Gastrointestinal pain  
 Gastrointestinal tract irritation      Gastrooesophageal reflux  
 disease      Generalised oedema      Genital discharge      Gestational  
 hypertension      Gingival bleeding      Gingival pain      Gingival  
 recession      Gingivitis      Glaucoma      Glossitis      Glossodynia      Glucose  
 tolerance decreased      Glucose tolerance impaired      Glycosuria  
 Glycosylated haemoglobin increased      Goitre      Gout      Grand mal  
 convulsion      Groin pain      Gynaecomastia      Haematemesis  
 Haematochezia      Haematocrit decreased      Haematoma      Haematuria  
 Haemoglobin      Haemoglobin decreased      Haemoglobin increased  
 Haemoglobinuria      Haemolysis      Haemolytic anaemia      Haemoptysis  
 Haemorrhage      Haemorrhage intracranial      Haemorrhoids  
 Haemothorax      Hair disorder      Hallucination      Hallucination,  
 auditory      Hallucination, visual      Hangover      Head discomfort      Head  
 titubation      Headache      Hearing impaired      Heart disease congenital  
 Heart rate irregular      Hemiparesis      Hemiplegia      Hepatic cirrhosis  
 Hepatic enzyme increased      Hepatic failure      Hepatic function  
 abnormal      Hepatic necrosis      Hepatic steatosis      Hepatitis      Hepatitis A  
 Hepatitis cholestatic      Hepatobiliary disease      Hepatocellular  
 injury      Hepatomegaly      Hernia      Herpes simplex      Herpes  
 virus infection      Herpes zoster      Hiccups      Hirsutism      Homicidal  
 ideation      Hormone level abnormal      Hostility      Hot flush      Hyperacusis  
 Hyperaemia      Hyperaesthesia      Hyperbilirubinaemia  
 Hyperchloraemia      Hyperchlorhydria      Hypercholesterolaemia  
 Hyperglycaemia      Hyperhidrosis      Hyperinsulinism  
 Hyperkalaemia      Hyperkeratosis      Hyperkinesia  
 Hyperlipidaemia      Hypermagnesaemia      Hypernatraemia  
 Hyperparathyroidism      Hyperphosphataemia      Hyperplasia  
 Hyperprolactinaemia      Hyperpyrexia      Hyperreflexia  
 Hypersensitivity      Hypersomnia      Hypertension      Hyperthermia  
 Hyperthyroidism      Hypertonia      Hypertrichosis  
 Hypertriglyceridaemia      Hypertrophy      Hyperuricaemia  
 Hyperuricosuria      Hyperventilation      Hypoaesthesia  
 Hypoaesthesia oral      Hypocalcaemia      Hypochloraemia  
 Hypocholesterolaemia      Hypochromic anaemia      Hypoglycaemia  
 Hypogonadism      Hypohidrosis      Hypokalaemia      Hypokinesia  
 Hypomagnesaemia      Hypomania      Hypomenorrhoea      Hyponatraemia  
 Hypophagia      Hypophosphataemia      Hypoproteinaemia      Hyporeflexia  
 Hypotension      Hypothermia      Hypothyroidism      Hypotonia  
 Hypoventilation      Hypovolaemia      Hypoxia      Idiopathic  
 thrombocytopenic purpura      Ileus      Ileus paralytic      Ill-defined  
 disorder      Immune system disorder      Inappropriate antidiuretic hormone

secretion Incontinence Increased appetite Induration  
Infarction Infection Infestation Inflammation Influenza  
Influenza like illness Inguinal hernia Initial insomnia  
Injection site mass Injection site pain Injection site  
reaction Insomnia Intention tremor Intentional self-injury  
Intermittent claudication Interstitial lung disease  
Intervertebral disc disorder Intestinal functional disorder  
Intestinal obstruction Intestinal perforation Intracranial  
pressure increased Iron deficiency Iron deficiency anaemia  
Irritability Irritable bowel syndrome Ischaemia  
Ischaemic stroke Jaundice Jaundice cholestatic Joint  
contracture Joint range of motion decreased Joint stiffness Joint  
swelling Judgement impaired Keratitis Keratopathy  
Ketoacidosis Ketosis Laboratory test abnormal  
Lacrimation decreased Lacrimation increased Lactic acidosis  
Laryngeal disorder Laryngeal oedema Laryngitis  
Laryngospasm Leiomyoma Lens disorder Lenticular  
opacities Lenticular pigmentation Lethargy Leukaemia  
Leukocytosis Leukoderma Leukopenia Leukoplakia oral  
Libido decreased Libido increased Lichen planus Lichenoid  
keratosis Lip blister Lip dry Lip swelling Liver disorder  
Liver function test abnormal Liver injury Local reaction  
Localised infection Localised oedema Logorrhoea Loss of  
consciousness Loss of libido Lower respiratory tract infection  
Lung adenocarcinoma stage I Lung disorder Lung infiltration  
Lung neoplasm malignant Lymphadenopathy Lymphocytosis  
Lymphoedema Lymphopenia Maculopathy Major depression Malaise  
Male sexual dysfunction Malignant melanoma Mania  
Masked facies Mastitis Mediastinal disorder Megacolon  
Melaena Memory impairment Meningitis Menopausal symptoms  
Menopause Menorrhagia Menstrual disorder Menstruation  
delayed Menstruation irregular Mental disability Mental disorder  
Mental retardation Mental status changes Mesenteric artery  
thrombosis Metabolic disorder Metrorrhagia Micturition  
disorder Micturition urgency Middle insomnia Migraine  
Miosis Mitral valve incompetence Mobility decreased  
Monocytosis Mood swings Motion sickness Mouth ulceration  
Movement disorder Muscle atrophy Muscle contractions  
involuntary Muscle contracture Muscle enzyme increased  
Muscle relaxant therapy Muscle rigidity Muscle spasms  
Muscle tightness Muscle twitching Muscular weakness  
Musculoskeletal chest pain Musculoskeletal discomfort  
Musculoskeletal disorder Musculoskeletal pain  
Musculoskeletal stiffness Myalgia Myasthenic syndrome  
Mydriasis Myelitis Myocardial infarction Myocardial  
ischaemia Myocarditis Myoclonus Myopathy Myopathy toxic  
Myopia Myositis Nail disorder Narcolepsy Nasal  
congestion Nasal disorder Nasal dryness Nasal obstruction Nasal  
oedema Nasopharyngitis Nausea Neck pain Necrosis  
Neoplasm Neoplasm malignant Neoplasm recurrence  
Nephritis Nephrolithiasis Nephrotic syndrome Nervous  
system disorder Nervousness Neuralgia Neuritis Neurodermatitis  
Neuroleptic malignant syndrome Neurological symptom  
Neuropathy peripheral Neurosis Neutropenia Neutrophil count  
decreased Neutrophil count increased Night blindness Night

sweats Nightmare Nocturia Nodule Normochromic  
normocytic anaemia Nuchal rigidity Nystagmus Obesity  
Obsessive thoughts Obstruction Ocular hyperaemia Oculogyric  
crisis Oculomucocutaneous syndrome Oedema Oedema peripheral  
Oesophageal disorder Oesophageal ulcer Oesophagitis  
Oligomenorrhoea Oliguria Onychomycosis Opisthotonus  
Oral candidiasis Oral pain Orchitis noninfective  
Oropharyngeal discomfort Oropharyngeal pain  
Oropharyngeal spasm Orthostatic hypotension  
Osteoarthritis Osteoarthropathy Osteodystrophy  
Osteomyelitis Osteopenia Osteoporosis Otitis externa  
Otitis media Otitis media chronic Ovarian cyst Pain  
Pain in extremity Pain in jaw Pain of skin Pallor  
Palpitations Pancreatitis Pancreatitis acute  
Pancytopenia Panic attack Panic disorder Panic  
disorder with agoraphobia Panic reaction Paraesthesia  
Paraesthesia oral Paralysis Paranoia Paresis  
Parkinsonian gait Parkinsonism Parosmia Parotid gland  
enlargement Pathological fracture Pathological gambling Pelvic pain  
Peptic ulcer Pericardial effusion Pericardial  
haemorrhage Pericarditis Pericarditis constrictive Perineal  
pain Periodontitis Periorbital oedema Peripheral coldness  
Peripheral ischaemia Peripheral vascular disorder Personality  
disorder Petechiae Petit mal epilepsy Phaeochromocytoma  
Pharyngeal disorder Pharyngeal erythema Pharyngitis  
Phlebitis Phlebitis superficial Phobia Phonological  
disorder Photophobia Photopsia Photosensitivity reaction  
Pigmentation disorder Piloerection Pituitary tumour  
benign Platelet count decreased Pleural disorder Pleural  
effusion Pleural fibrosis Pneumonia Pneumonia aspiration  
Pneumothorax Poisoning Pollakiuria Polycythaemia  
Polydipsia Polymyalgia rheumatica Polyp Polyuria Postural  
orthostatic tachycardia syndrome Posture abnormal Pre-eclampsia  
Precocious puberty Pregnancy Pregnancy test false  
positive Pregnancy test positive Premature ejaculation  
Premenstrual syndrome Presyncope Priapism Proctalgia  
Productive cough Prolactinoma Prostatic disorder  
Prostatitis Protein urine present Proteinuria Protrusion tongue  
Pruritus Pruritus generalised Pruritus genital Psoriasis  
Psychiatric symptom Psychomotor retardation Psychotic  
disorder Puberty Pulmonary congestion Pulmonary embolism  
Pulmonary fibrosis Pulmonary hypertension Pulmonary oedema  
Pulse absent Purpura Purpura non-thrombocytopenic  
Pyelonephritis Pyuria Rales Rash Rash erythematous Rash  
generalised Rash maculo-papular Rash papular Rash pustular  
Rash vesicular Raynaud's phenomenon Rectal haemorrhage  
Rectal tenesmus Red blood cell count decreased Red blood  
cell sedimentation rate increased Reflux oesophagitis Regressive  
behaviour Renal failure Renal failure acute Renal impairment  
Renal pain Respiratory alkalosis Respiratory arrest  
Respiratory disorder Respiratory distress Respiratory  
failure Respiratory tract congestion Respiratory tract infection  
Respiratory tract infection viral Restless legs syndrome  
Retching Retinal artery occlusion Retinal detachment  
Retinal disorder Retinal vascular disorder Retinal vein

occlusion Retinitis pigmentosa Retrograde ejaculation  
Retroperitoneal fibrosis Rhabdomyolysis Rheumatoid  
arthritis Rhinitis Rhinitis allergic Rhinitis seasonal Rhinorrhoea  
Rhonchi Rosacea Salivary gland disorder Salivary  
gland enlargement Salivary hypersecretion Salpingitis Sarcoidosis  
Sarcoma Scab Schizoaffective disorder Schizophrenia  
Schizophreniform disorder Sciatica Scleral disorder  
Scotoma Seasonal allergy Seborrhoeic dermatitis Sedation  
Semen analysis abnormal Sensation of heaviness Sensory  
loss Sepsis Septic shock Severe acute respiratory syndrome  
Sexual dysfunction Shock Sialoadenitis Sinus arrhythmia  
Sinus bradycardia Sinus congestion Sinus disorder Sinus  
headache Sinus tachycardia Sinusitis Skin cancer Skin  
discolouration Skin disorder Skin exfoliation Skin hypertrophy  
Skin irritation Skin lesion Skin mass Skin papilloma Skin  
ulcer Sleep apnoea syndrome Sleep disorder Sleep paralysis Sleep  
talking Sluggishness Small intestinal obstruction Sneezing  
Social avoidant behaviour Somnambulism Somnolence  
Speech disorder Splenomegaly Status epilepticus  
Stevens-Johnson syndrome Stomatitis Stridor Stupor  
Subarachnoid haemorrhage Subcutaneous abscess  
Subcutaneous nodule Subdural haematoma Sudden death  
Suicidal ideation Suicide attempt Superior sagittal sinus  
thrombosis Supraventricular extrasystoles Supraventricular  
tachycardia Surgery Suspiciousness Swelling Swelling face  
Swollen tongue Syncope Synostosis Systemic lupus  
erythematosus Tachycardia Tardive dyskinesia Tenderness  
Tendinous contracture Tendon disorder Tendonitis  
Tenosynovitis Tension Tension headache Teratogenicity  
Testicular pain Testicular swelling Tetany Thinking  
abnormal Thirst Thought blocking Throat tightness  
Thrombocytopenia Thrombocytopenic purpura Thrombocytosis  
Thrombophlebitis Thrombosis Thrombotic thrombocytopenic  
purpura Thyroid adenoma Thyroiditis Tic Tinnitus Tongue  
discolouration Tongue disorder Tongue dry Tongue oedema  
Tongue paralysis Tongue spasm Tonsillar hypertrophy  
Tonsillitis Tooth abscess Tooth disorder Tooth hypoplasia  
Tooth impacted Tooth infection Toothache Torsade de  
pointes Torticollis Toxic epidermal necrolysis Tracheobronchitis  
Transaminases increased Transient ischaemic attack  
Tremor Trismus Tuberculin test positive  
Tubulointerstitial nephritis Ulcer Ulcer haemorrhage Unintended  
pregnancy Unresponsive to stimuli Upper respiratory tract  
infection Urethral disorder Urethral pain Urinary hesitation  
Urinary incontinence Urinary retention Urinary tract disorder  
Urinary tract infection Urine abnormality Urine analysis  
abnormal Urine output increased Urosepsis Urticaria Uterine  
disorder Uterine haemorrhage Uterine leiomyoma Uterovaginal  
prolapse VIIIth nerve paralysis Vaginal discharge Vaginal  
haemorrhage Vaginal infection Vaginal inflammation Varicose vein  
Vascular purpura Vasculitis Vasoconstriction Vasodilation  
procedure Vasospasm Venous occlusion Venous thrombosis Ventricular  
arrhythmia Ventricular extrasystoles Ventricular fibrillation  
Ventricular tachycardia Vertigo Viral diarrhoea Viral  
infection Vision blurred Visual acuity reduced Visual impairment

Vomiting      Vulvovaginal candidiasis      Vulvovaginal dryness  
 Vulvovaginal mycotic infection      Vulvovaginal pruritus  
 Vulvovaginitis      Water intoxication      Weight decreased  
 Weight fluctuation      Weight increased      Wheezing      White blood  
 cell count decreased      White blood cell count increased      White blood  
 cells urine positive      Withdrawal bleed      Withdrawal syndrome  
 Xerophthalmia      Xerosis      Yawning

\*\*\*\*\*  
 \*\*\*\*\*

Potassium voltage-gated channel subfamily H member 6 - Group:  
 Channel

Treated with:

ibutilide: approved      small molecule      (53 associated side effects)  
 Indicated for the rapid conversion of atrial fibrillation or  
 atrial flutter of recent onset to sinus rhythm.  
 prazosin: approved      small molecule      (93 associated side effects)  
 For treatment of hypertension, symptomatic benign prostatic  
 hyperplasia, and severe congestive heart failure. May also be used  
 alone or in combination with &beta;-blockers in the preoperative  
 management of signs and symptoms of pheochromocytoma.  
 doxazosin: approved      small molecule      (243 associated side  
 effects)      For treatment and management of mild to moderate  
 hypertension and urinary obstruction symptoms caused by BPH.  
 miconazole: approved      small molecule      (33 associated side effects)  
 For topical application in the treatment of tinea pedis  
 (athlete's foot), tinea cruris, and tinea corporis caused  
 by *Trichophyton rubrum*, *Trichophyton*  
*mentagrophytes*, and *Epidermophyton*  
*floccosum*, in the treatment of cutaneous candidiasis  
 (moniliasis), and in the treatment of tinea versicolor.  
 terazosin: approved      small molecule      (115 associated side  
 effects)      For the treatment of symptomatic BPH and mild to moderate  
 hypertension.

311 known side effects mediated through drugs targeting this  
 protein:

Abdominal discomfort      Abdominal distension      Abdominal pain  
 Abnormal dreams      Acute coronary syndrome      Affect lability  
 Agitation      Alopecia      Amblyopia      Amnesia      Anaphylactic  
 shock      Anaphylactoid reaction      Aneurysm      Angina pectoris      Angioedema  
 Anorectal discomfort      Anoxia      Antinuclear antibody  
 positive      Anxiety      Apathy      Arrhythmia      Arthralgia      Arthritis  
 Arthropathy      Asthenia      Asthma      Ataxia      Atrial  
 fibrillation      Atrioventricular block first degree  
 Atrioventricular block second degree      Back pain      Bladder  
 pain      Blindness      Blood creatine phosphokinase increased      Blood  
 creatinine increased      Blood urea increased      Blood uric acid  
 increased      Body temperature increased      Bradycardia      Breast disorder  
 Breast neoplasm      Breast pain      Bronchitis      Bronchospasm  
 Bundle branch block      Burning sensation      Cardiac arrest  
 Cardiac disorder      Cardiac failure      Cardiac failure congestive  
 Cardiac fibrillation      Cataract      Cerebrovascular accident  
 Cerebrovascular disorder      Chest pain      Chills  
 Cholelithiasis      Cholestasis      Confusional state      Congenital eye  
 disorder      Conjunctivitis      Constipation      Convulsion

Coordination abnormal Cough Crocodile tears syndrome  
 Cystitis Cystitis noninfective Deafness Death Decreased  
 appetite Dehydration Depersonalisation Dermatitis Dermatitis  
 contact Diarrhoea Diplopia Discomfort Disturbance in  
 attention Disturbance in sexual arousal Diverticulitis  
 Dizziness Dizziness postural Dry mouth Dry skin  
 Dysgeusia Dyskinesia Dyspepsia Dysphagia Dyspnoea  
 Dysuria Ear infection Ear pain Eczema Ejaculation  
 failure Electrocardiogram abnormal Encephalopathy  
 Epididymitis Epistaxis Erectile dysfunction Erythema  
 Extrasystoles Eye disorder Eye pain Face oedema  
 Faecal incontinence Fatigue Feeling abnormal Flat affect  
 Flatulence Floppy iris syndrome Flushing Fungal infection  
 Gastric ulcer Gastritis Gastroenteritis Gastrointestinal  
 haemorrhage Gastrointestinal pain Gastrointestinal tract irritation  
 Genital burning sensation Genital discharge Gingivitis Gout  
 Gynaecomastia Haematocrit decreased Haematuria Haemoglobin  
 decreased Haemorrhage Hallucination Headache Hepatic function  
 abnormal Hepatitis cholestatic Hernia Herpes simplex  
 Herpes virus infection Herpes zoster Hot flush  
 Hyperglycaemia Hyperhidrosis Hypersensitivity  
 Hypertension Hypertonia Hypertrophy Hyperuricaemia  
 Hypoaesthesia Hypokalaemia Hypokinesia Hypophosphataemia  
 Hypotension Hypotonia Ill-defined disorder Immune system  
 disorder Incontinence Increased appetite Infarction  
 Infection Influenza Influenza like illness Insomnia  
 Intermittent claudication Ischaemia Jaundice Lacrimation  
 increased Laryngospasm Leukocytosis Leukopenia Libido  
 decreased Lichen planus Liver function test abnormal Loss of  
 consciousness Lung neoplasm malignant Lymphadenopathy  
 Malaise Melaena Menopausal symptoms Menopause  
 Mental disability Mental disorder Micturition disorder  
 Migraine Miosis Mood swings Movement disorder Muscle  
 spasms Muscle twitching Muscular weakness Musculoskeletal  
 discomfort Musculoskeletal pain Myalgia Myocardial infarction  
 Myocardial ischaemia Myopia Nail disorder Narcolepsy  
 Nasal congestion Nasopharyngitis Nausea Neck pain  
 Neoplasm Neoplasm malignant Nephrolithiasis Nervous  
 system disorder Nervousness Neutropenia Nightmare Nodal arrhythmia  
 Oedema Oedema peripheral Oesophagitis Oliguria  
 Orthostatic hypotension Osteoarthritis Otitis media  
 Pain Pain of skin Pallor Palpitations  
 Pancreatitis Paraesthesia Paresis Parosmia  
 Pelvic pain Perineal pain Peripheral ischaemia Pharyngitis  
 Photophobia Photosensitivity reaction Platelet disorder  
 Pneumonia Pollakiuria Polymyalgia rheumatica Polyuria  
 Priapism Proctalgia Prostatic disorder Pruritus  
 Pruritus genital Psoriasis Purpura Rash erythematous Rash  
 maculo-papular Rash papular Rectal haemorrhage Rectal  
 tenesmus Renal failure Renal pain Respiratory disorder  
 Respiratory tract infection Retinal disorder Retrograde  
 ejaculation Rhinitis Rhythm idioventricular Scleral disorder  
 Scotoma Seborrhoeic dermatitis Semen analysis abnormal  
 Sepsis Sexual dysfunction Shock Sinus bradycardia Sinus  
 tachycardia Sinusitis Skin disorder Skin hypertrophy Somnolence

Speech disorder    Subarachnoid haemorrhage    Sudden death  
 Supraventricular extrasystoles    Supraventricular tachycardia  
 Syncope    Tachyarrhythmia    Tachycardia    Tendon disorder  
 Tension    Thinking abnormal    Thirst    Thrombocytopenia  
 Tinnitus    Tongue disorder    Tooth disorder    Tooth hypoplasia  
 Tremor    Ulcer    Upper respiratory tract infection    Urethral  
 disorder    Urinary incontinence    Urinary retention    Urinary tract  
 disorder    Urinary tract infection    Urine abnormality    Urine  
 analysis abnormal    Urine output increased    Urticaria    Vaginal discharge  
 Vascular purpura    Vasculitis    Vasodilation procedure    Ventricular  
 arrhythmia    Ventricular extrasystoles    Ventricular tachycardia  
 Vertigo    Viral infection    Vision blurred    Visual acuity  
 reduced    Visual impairment    Vomiting    Vulvovaginal discomfort  
 Vulvovaginal erythema    Weight decreased    Weight increased  
 \*\*\*\*\*  
 \*\*\*\*\*

Granulocyte-macrophage colony-stimulating factor receptor alpha  
 chain - Group: Receptor

Treated with:

sargramostim:    approved    biotech    (0 associated side effects)  
 For the treatment of cancer and bone marrow transplant

known side effects mediated through drugs targeting this protein:

\*\*\*\*\*  
 \*\*\*\*\*

Calcium-activated potassium channel subunit alpha 1 - Group: Channel  
 Treated with:

enflurane: approved    small molecule    (15 associated side effects)

Used for the induction and maintenance of general anaesthesia  
 during surgery and cesarean section and also used for analgesia  
 during vaginal delivery.

chlorzoxazone: approved    small molecule    (18 associated side  
 effects)    For the relief of discomfort associated with acute  
 painful musculoskeletal conditions.

bendroflumethiazide: approved    small molecule    (0 associated  
 side effects)    For the treatment of high blood pressure and  
 management of edema related to heart failure.

hydroflumethiazide: approved    small molecule    (38 associated  
 side effects)    Used as adjunctive therapy in edema associated with  
 congestive heart failure, hepatic cirrhosis, and corticosteroid and  
 estrogen therapy. Also used in the management of hypertension either  
 as the sole therapeutic agent or to enhance the effect of other  
 antihypertensive drugs in the more severe forms of hypertension.

hydrochlorothiazide: approved    small molecule    (226 associated  
 side effects)    For the treatment of high blood pressure and  
 management of edema.

cromoglicic acid: approved    small molecule    (0 associated side  
 effects)    For the management of patients with bronchial asthma.  
 Also used in the treatment of vernal keratoconjunctivitis, vernal  
 conjunctivitis, and vernal keratitis.

miconazole: approved    small molecule    (33 associated side effects)

For topical application in the treatment of tinea pedis  
 (athlete's foot), tinea cruris, and tinea corporis caused  
 by &#x201c;Trichophyton rubrum&#x201c;, &#x201c;Trichophyton



mentagrophytes</i>, and <i>Epidermophyton floccosum</i>, in the treatment of cutaneous candidiasis (moniliasis), and in the treatment of tinea versicolor.  
 diazoxide: approved small molecule (124 associated side effects) Used parentally to treat hypertensive emergencies. Also used to treat hypoglycemia secondary to insulinoma.  
 halothane: approved small molecule (10 associated side effects)  
 For the induction and maintenance of general anesthesia

320 known side effects mediated through drugs targeting this protein:

Abdominal discomfort Abdominal distension Abdominal pain Acute coronary syndrome  
 Ageusia Agitation Agranulocytosis Albuminuria  
 Alopecia Anaemia Anaphylactic shock Anaphylactoid reaction  
 Angina pectoris Angioedema Antinuclear antibody positive  
 Anuria Anxiety Aplastic anaemia Arrhythmia  
 Arterial stenosis Arthralgia Arthritis Aspartate aminotransferase increased  
 Assisted fertilisation Asthenia  
 Asthma Ataxia Atrial fibrillation Atrial tachycardia  
 Azotaemia Back pain Blindness Blood creatinine decreased  
 Blood creatinine increased Blood immunoglobulin G decreased  
 Blood pressure increased Blood urea increased Blood uric acid increased  
 Body temperature increased Bradycardia  
 Breast disorder Breast mass Breast pain Breath sounds abnormal  
 Bronchospasm Burning sensation Bursitis Cardiac arrest  
 Cardiac disorder Cardiac failure Cardiac failure congestive  
 Cardiac fibrillation Cardiac murmur Cataract Cellulitis  
 Cerebral ischaemia Cerebrovascular accident Chest discomfort  
 Chest pain Chills Choking sensation Chromaturia  
 Colitis Coma Conduction disorder Confusional state  
 Conjunctival haemorrhage Conjunctivitis Constipation  
 Convulsion Coombs test positive Cough Cutaneous vasculitis  
 Cytogenetic abnormality Deafness Decreased appetite  
 Dehydration Dermatitis Dermatitis contact Dermatitis  
 exfoliative Diabetes mellitus Diabetic hyperosmolar coma Diabetic ketoacidosis  
 Diarrhoea Diplopia Discomfort Disease progression  
 Disturbance in sexual arousal Dizziness Drug interaction  
 Dry mouth Dysaesthesia Dysgeusia Dyspepsia  
 Dyspnoea paroxysmal nocturnal Dysuria Ear infection  
 Ear pain Ecchymosis Effusion Electrocardiogram change  
 Electrolyte depletion Electrolyte imbalance Embolism  
 Emotional disorder Eosinophilia Epistaxis Erectile dysfunction  
 Erythema Erythema multiforme Essential hypertension  
 Euphoric mood Extrapyrasidal disorder Extravasation  
 Face oedema Fatigue Feeling abnormal Flank pain Flatulence  
 Fluid retention Flushing Galactorrhoea Gastritis  
 Gastroenteritis Gastrointestinal haemorrhage Gastrointestinal pain  
 Genital burning sensation Genital discharge Glycosuria Gout  
 Haematuria Haemoglobin Haemoglobin decreased Haemolytic anaemia  
 Haemoptysis Haemorrhage Headache Hearing impaired  
 Hepatic enzyme increased Hepatic failure Hepatic necrosis  
 Hepatitis Herpes virus infection Herpes zoster Hirsutism  
 Hyperglycaemia Hyperhidrosis Hyperkalaemia  
 Hyperkinesia Hyperprolactinaemia Hyperpyrexia  
 Hypersensitivity Hypertensive crisis Hyperthermia malignant

Hypertrophy Hyperuricaemia Hypoaesthesia Hypocapnia  
 Hypochloroemia Hypokalaemia Hyponatraemia Hypotension  
 Hypovolaemia Hypoxia Ileus Ill-defined disorder  
 Immune system disorder Infarction Infection Infection  
 susceptibility increased Influenza Injection site phlebitis  
 Insomnia Irritability Ischaemia Jaundice Jaundice  
 cholestatic Joint stiffness Ketoacidosis Lacrimation increased  
 Laryngitis Lethargy Leukocytosis Leukopenia Libido  
 decreased Loss of consciousness Lung infiltration Lung neoplasm  
 Lymphadenopathy Malaise Mass Memory impairment Muscle  
 spasms Muscular weakness Musculoskeletal chest pain  
 Musculoskeletal discomfort Musculoskeletal pain  
 Musculoskeletal stiffness Myalgia Myocardial infarction  
 Myocardial ischaemia Nasopharyngitis Nausea Neck pain  
 Necrosis Neoplasm Nephritis Nephrotic syndrome  
 Nervous system disorder Nervousness Neuropathy peripheral  
 Neutropenia Nocturia Nocturnal dyspnoea Oedema  
 Oedema peripheral Oliguria Optic nerve disorder Optic nerve  
 infarction Optic neuritis Oropharyngeal discomfort  
 Oropharyngeal pain Orthopnoea Orthostatic hypotension  
 Ovarian disorder Pain Pain in extremity Painful respiration  
 Palpitations Pancreatic necrosis Pancreatitis  
 Pancreatitis acute Pancytopenia Papilloedema  
 Paraesthesia Paralysis Parotid gland enlargement  
 Pelvic pain Pemphigus Petechiae Pharyngitis Phlebitis  
 Photophobia Photosensitivity reaction Pleural disorder  
 Pleural effusion Pneumonia Polyneuropathy Polyuria  
 Prostatic disorder Pruritus Pruritus genital Pulmonary  
 congestion Pulmonary embolism Pulmonary eosinophilia Pulmonary  
 function test decreased Pulmonary oedema Purpura  
 Pyelonephritis Rash Red blood cell sedimentation rate  
 increased Renal artery stenosis Renal failure acute Respiratory  
 arrest Respiratory depression Respiratory disorder Respiratory  
 distress Respiratory tract congestion Respiratory tract infection  
 Rhabdomyolysis Rhinitis Rhinorrhoea Salivary  
 hypersecretion Salmonellosis Scotoma Sedation Sensory  
 loss Sexual dysfunction Shock Sialoadenitis Sinusitis Skin  
 infection Sleep disorder Social avoidant behaviour Somnolence  
 Supraventricular tachycardia Swelling face Syncope  
 Tachycardia Tenderness Tension Thrombocytopenia Toxic  
 epidermal necrolysis Tracheobronchitis Transient ischaemic attack  
 Tremor Tubulointerstitial nephritis Upper respiratory  
 tract infection Urethral disorder Urinary tract disorder Urinary  
 tract infection Urine colour abnormal Urticaria Vaginal discharge  
 Vascular purpura Vasculitis Vasculitis necrotising Ventricular  
 extrasystoles Ventricular tachycardia Vertigo Vision  
 blurred Visual acuity reduced Visual impairment Vomiting  
 Vulvovaginal discomfort Vulvovaginal erythema Weight  
 decreased Weight increased Wheezing Xanthopsia

\*\*\*\*\*  
 \*\*\*\*\*

bacterial outer membrane - Group: Other

Treated with:

polymyxin b sulfate: approved small molecule (18 associated  
 side effects) For treatment of infections of the urinary tract,

meninges, and blood stream, caused by susceptible strains of  
&lt;i>Pseudomonas aeruginosa&/i>.  
colistin: approved small molecule (0 associated side effects)  
For the treatment of acute or chronic infections due to  
sensitive strains of certain gram-negative bacilli, particularly  
&lt;i>Pseudomonas aeruginosa&/i>.  
colistimethate: approved small molecule (0 associated side  
effects) For the treatment of acute or chronic infections due to  
sensitive strains of certain gram-negative bacilli, particularly  
&lt;i>Pseudomonas aeruginosa&/i>.

18 known side effects mediated through drugs targeting this protein:  
Albuminuria Apnoea Ataxia Azotaemia Body temperature  
increased Dermatitis Dizziness Flushing Headache Meningism  
Musculoskeletal stiffness Nuchal rigidity Pain  
Paraesthesia Rash Somnolence Thrombophlebitis Urticaria  
\*\*\*\*\*  
\*\*\*\*\*

5-hydroxytryptamine 1D receptor - Group: Receptor

Treated with:

eletriptan: approved small molecule (242 associated side  
effects) For the acute treatment of migraine with or without aura  
in adults.

ziprasidone: approved small molecule (251 associated side  
effects) For the treatment of schizophrenia and related psychotic  
disorders.

cabergoline: approved small molecule (96 associated side  
effects) For the treatment of hyperprolactinemic disorders, either  
idiopathic or due to prolactinoma (prolactin-secreting adenomas).  
May also be used to manage symptoms of Parkinsonian Syndrome as  
monotherapy during initial symptomatic management or as an adjunct  
to levodopa therapy during advanced stages of disease.

ropinirole: approved small molecule (631 associated side  
effects) For the treatment of the signs and symptoms of idiopathic  
Parkinson's disease. Also used for the treatment of restless legs  
syndrome.

zolmitriptan: approved small molecule (241 associated side  
effects) For the acute treatment of adult migraine with or without  
auras.

dihydroergotamine: approved small molecule (128 associated  
side effects) For the acute treatment of migraine headaches with  
or without aura and the acute treatment of cluster headache  
episodes.

olanzapine: approved small molecule (393 associated side  
effects) For the acute and maintenance treatment of schizophrenia  
and related psychotic disorders, as well as acute treatment of manic  
or mixed episodes of bipolar 1 disorder. Intramuscular olanzapine is  
indicated for the rapid control of agitated patients.

clozapine: approved small molecule (228 associated side  
effects) For use in patients with treatment-resistant  
schizophrenia.

pramipexole: approved small molecule (620 associated side  
effects) For the treatment of signs and symptoms of idiopathic  
Parkinson's disease

lisuride: approved small molecule (0 associated side effects)  
For the management of Parkinson's Disease

sumatriptan: approved small molecule (317 associated side effects)  
For the treatment of migraine attacks with or without aura.

apomorphine: approved small molecule (45 associated side effects)  
For the acute, intermittent treatment of hypomobility, off episodes (end-of-dose wearing off and unpredictable on/off episodes) associated with advanced Parkinson's disease.

risperidone: approved small molecule (532 associated side effects)  
For the treatment of schizophrenia in adults and in adolescents, ages 13 to 17, and for the short-term treatment of manic or mixed episodes of bipolar I disorder in children and adolescents ages 10 to 17. May also be used to manage symptoms of inappropriate behavior due to aggression and/or psychosis in patients with severe dementia.

almotriptan: approved small molecule (135 associated side effects)  
For the treatment of acute migraine headache in adults

naratriptan: approved small molecule (185 associated side effects)  
For the acute treatment of migraine attacks with or without aura in adults.

rizatriptan: approved small molecule (170 associated side effects)  
For treatment of acute migraine attacks with or without aura.

frovatriptan: approved small molecule (148 associated side effects)  
For the acute treatment of migraine attacks with or without aura in adults.

pergolide: approved, withdrawn small molecule (354 associated side effects)  
Indicated as adjunctive treatment to levodopa/carbidopa in the management of the signs and symptoms of Parkinson's disease. It was withdrawn from the US and Canadian markets in 2007 due to an increased risk of cardiac valvulopathy.

bromocriptine: approved small molecule (120 associated side effects)  
For the treatment of galactorrhea due to hyperprolactinemia, prolactin-dependent menstrual disorders and infertility, prolactin-secreting adenomas, prolactin-dependent male hypogonadism, as adjunct therapy to surgery or radiotherapy for acromegaly or as monotherapy in special cases, as monotherapy in early Parkinsonian Syndrome or as an adjunct with levodopa in advanced cases with motor complications. Bromocriptine has also been used off-label to treat restless legs syndrome and neuroleptic malignant syndrome.

quetiapine: approved small molecule (359 associated side effects)  
For the treatment of schizophrenia and related psychotic disorders.

aripiprazole: approved small molecule (630 associated side effects)  
For the treatment of schizophrenia and related psychotic disorders.

paliperidone: approved small molecule (216 associated side effects)  
For the treatment of schizophrenia.

yohimbine: approved small molecule (0 associated side effects)  
Indicated as a sympatholytic and mydriatic. Impotence has been successfully treated with yohimbine in male patients with vascular or diabetic origins and psychogenic origins.

1333 known side effects mediated through drugs targeting this protein:

Abasia Abdominal adhesions Abdominal discomfort Abdominal distension Abdominal neoplasm Abdominal pain Abdominal pain lower Abdominal pain upper Abdominal tenderness Abnormal behaviour Abnormal dreams Abnormal faeces Abortion spontaneous Abscess Accommodation disorder Acidosis Acne Actinic keratosis Acute abdomen Acute coronary syndrome Acute lymphocytic leukaemia Acute myocardial infarction Acute psychosis Acute tonsillitis Adenocarcinoma Adenoma benign Adhesion Adverse reaction Affect lability Affective disorder Ageusia Aggression Agitation Agoraphobia Agranulocytosis Akathisia Akinesia Alanine aminotransferase increased Albright's disease Albuminuria Alcohol intolerance Alkalosis Alopecia Altered state of consciousness Amaurosis fugax Amblyopia Amenorrhoea Amnesia Anaemia Anaemia macrocytic Anaemia megaloblastic Anaphylactic shock Anaphylactoid reaction Aneurysm Anger Angina pectoris Angina unstable Angioedema Angiomyolipoma Angiopathy Angle closure glaucoma Anorectal discomfort Anorectal disorder Anorgasmia Antidiuretic hormone abnormality Antisocial behaviour Antisocial personality disorder Anxiety Aortic aneurysm Aortic dissection Apathy Aphasia Aphonia Aphthous stomatitis Apnoea Appendicitis Application site reaction Apraxia Arrhythmia Arrhythmia supraventricular Arterial disorder Arterial occlusive disease Arterial stenosis Arteriosclerosis Arteriospasm coronary Arteritis Arthralgia Arthritis Arthropathy Ascites Asocial behaviour Aspartate aminotransferase increased Asphyxia Aspiration Asthenia Asthma Ataxia Atelectasis Atrial fibrillation Atrial flutter Atrial septal defect Atrioventricular block Atrioventricular block first degree Atrioventricular block second degree Atrophy Aura Automatism Azotaemia Back pain Bacterial infection Balance disorder Balanoposthitis Basal cell carcinoma Basophilia Benign intracranial hypertension Benign neoplasm Benign neoplasm of skin Benign prostatic hyperplasia Biliary colic Binge eating Bladder cancer Bladder disorder Bladder pain Blepharitis Blepharospasm Blindness Blindness transient Blister Blood alkaline phosphatase increased Blood amylase increased Blood antidiuretic hormone abnormal Blood bilirubin abnormal Blood bilirubin increased Blood cholesterol increased Blood creatine phosphokinase increased Blood creatinine increased Blood disorder Blood electrolytes abnormal Blood glucose decreased Blood glucose increased Blood insulin increased Blood iron decreased Blood lactate dehydrogenase increased Blood phosphorus increased Blood potassium decreased Blood potassium increased Blood pressure abnormal Blood pressure diastolic decreased Blood pressure fluctuation Blood pressure increased Blood pressure systolic decreased Blood prolactin increased Blood testosterone decreased Blood triglycerides increased Blood triglycerides normal Blood urea increased Blood uric acid increased Blood urine Blood urine present Blunted affect Body temperature decreased Body temperature increased Bone disorder Bone neoplasm Bone pain Bone sarcoma Bradycardia

Bradykinesia      Bradyphrenia      Brain neoplasm      Brain  
 neoplasm benign      Brain oedema      Breast cancer      Breast cyst  
 Breast discharge      Breast discomfort      Breast disorder      Breast  
 disorder female      Breast disorder male      Breast engorgement  
 Breast enlargement      Breast feeding      Breast neoplasm  
 Breast pain      Breast swelling      Breast tenderness      Breath odour  
 Bronchiolitis      Bronchitis      Bronchopneumonia  
 Bronchopneumopathy      Bronchospasm      Bruxism  
 Buccoglossal syndrome      Bulimia nervosa      Bundle branch block  
 Bundle branch block left      Bundle branch block right  
 Burning sensation      Bursitis      Cachexia      Calculus bladder  
 Calculus urinary      Cancer in remission      Candidiasis  
 Carbohydrate tolerance decreased      Cardiac arrest      Cardiac  
 disorder      Cardiac failure      Cardiac failure congestive      Cardiac  
 fibrillation      Cardiac flutter      Cardiac murmur      Cardiac septal  
 defect      Cardiac valve disease      Cardio-respiratory arrest  
 Cardiomegaly      Cardiomyopathy      Cardiopulmonary failure  
 Cardiovascular disorder      Carotid artery occlusion  
 Carpal tunnel syndrome      Cataplexy      Cataract      Catatonia      Cells  
 in urine      Cellulitis      Cerebral artery embolism      Cerebral atrophy  
 Cerebral haemorrhage      Cerebral infarction      Cerebral  
 ischaemia      Cerebrospinal fluid rhinorrhoea      Cerebrovascular  
 accident      Cerebrovascular disorder      Cervicitis      Cervix carcinoma  
 Change of bowel habit      Chapped lips      Cheilitis      Chest  
 discomfort      Chest pain      Chills      Choking      Choking sensation  
 Cholecystitis      Cholecystitis chronic      Cholelithiasis  
 Cholestasis      Chorea      Choreoathetosis      Chromaturia      Chronic  
 lymphocytic leukaemia      Chronic obstructive pulmonary disease  
 Coagulopathy      Coccydynia      Cognitive disorder      Cogwheel  
 rigidity      Cold sweat      Colitis ischaemic      Colitis ulcerative      Colon  
 cancer      Colorectal cancer      Coma      Completed suicide      Compulsions  
 Condition aggravated      Confusional state      Congenital anomaly  
 Congenital eye disorder      Congenital foot malformation  
 Congenital genitourinary abnormality      Conjunctival  
 haemorrhage      Conjunctivitis      Connective tissue disorder  
 Constipation      Conversion disorder      Convulsion  
 Coordination abnormal      Corneal lesion      Coronary artery  
 disease      Coronary artery occlusion      Costochondritis      Cough  
 Crocodile tears syndrome      Crying      Cyanosis      Cystitis  
 Cystitis noninfective      Cytolytic hepatitis      Dandruff  
 Deafness      Death      Decreased appetite      Decubitus ulcer      Deep  
 vein thrombosis      Deficiency anaemia      Deformity      Dehydration  
 Delirium      Delusion      Dementia      Dementia with Lewy bodies  
 Dental caries      Dependence      Depersonalisation      Depressed level  
 of consciousness      Depressed mood      Depression      Depressive symptom  
 Derealisation      Dermal cyst      Dermatitis      Dermatitis atopic  
 Dermatitis bullous      Dermatitis contact      Dermatitis  
 exfoliative      Dermatitis infected      Dermoid cyst      Developmental  
 delay      Diabetes mellitus      Diabetic coma      Diabetic hyperglycaemic coma  
 Diabetic hyperosmolar coma      Diabetic ketoacidosis  
 Diaphragmatic hernia      Diarrhoea      Diarrhoea haemorrhagic  
 Diplegia      Diplopia      Discomfort      Disorientation  
 Disseminated intravascular coagulation      Dissociation  
 Disturbance in attention      Disturbance in sexual arousal  
 Diverticulitis      Dizziness      Dizziness exertional      Dizziness

postural Drooling Drug abuse Drug dependence Drug eruption  
 Drug hypersensitivity Drug ineffective Drug interaction Drug  
 level increased Drug withdrawal syndrome Drug withdrawal  
 syndrome neonatal Dry eye Dry mouth Dry skin Dry throat  
 Duodenal ulcer Duodenal ulcer haemorrhage Duodenitis  
 Dysaesthesia Dysarthria Dysentery Dysgeusia Dysgraphia  
 Dyskinesia Dysmenorrhoea Dyspepsia Dysphagia Dysphemia  
 Dysphonia Dysphoria Dyspnoea Dyspnoea exertional  
 Dysthymic disorder Dystonia Dysuria Ear disorder  
 Ear infection Ear pain Ecchymosis Eclampsia Eczema  
 Effusion Ejaculation delayed Ejaculation disorder  
 Ejaculation failure Elastosis perforans Elderly  
 Electrocardiogram PR prolongation Electrocardiogram QT  
 prolonged Electrocardiogram ST segment depression Electrocardiogram  
 ST segment elevation Electrocardiogram T wave inversion  
 Electrocardiogram abnormal Electrocardiogram change  
 Electroencephalogram abnormal Electrolyte imbalance  
 Embolism Emotional distress Emphysema Encephalopathy  
 Endocrine disorder Endometrial cancer Endometrial  
 neoplasm Endometriosis Energy increased Enteritis Enuresis  
 Enzyme abnormality Eosinophil count increased  
 Eosinophilia Epicondylitis Epididymitis Epilepsy  
 Epistaxis Erectile dysfunction Eructation Erythema  
 Erythema multiforme Erythromelalgia Euphoric mood  
 Exfoliative rash Exostosis Extrapyrarnidal disorder  
 Extrasystoles Eye discharge Eye disorder Eye  
 haemorrhage Eye infection Eye inflammation Eye irritation Eye  
 movement disorder Eye oedema Eye pain Eye pruritus Eye  
 swelling Eyelid disorder Eyelid function disorder Eyelid  
 oedema Eyelid ptosis Face oedema Facial pain Facial paresis  
 Faecal incontinence Faecalith Faecaloma Faeces  
 discoloured Faeces hard Fallopiian tube disorder Fasciitis  
 Fasting Fatigue Fear Feeling abnormal Feeling cold  
 Feeling hot Feeling jittery Feeling of body temperature change  
 Female sexual dysfunction Fibroadenoma of breast Fibrocystic  
 breast disease Fibrosis Flank pain Flat affect Flatulence Fluid  
 overload Fluid retention Flushing Foetor hepaticus  
 Folliculitis Formication Fungal infection Fungal skin  
 infection Furuncle Gait disturbance Galactorrhoea Gallbladder  
 cancer Gallbladder disorder Gamma-glutamyltransferase  
 increased Gangrene Gastric cancer Gastric disorder Gastric  
 haemorrhage Gastric pH decreased Gastric polyps Gastric ulcer  
 Gastric ulcer haemorrhage Gastritis Gastritis haemorrhagic  
 Gastroenteritis Gastrointestinal carcinoma Gastrointestinal  
 disorder Gastrointestinal haemorrhage Gastrointestinal infection  
 Gastrointestinal neoplasm Gastrointestinal obstruction  
 Gastrointestinal pain Gastrointestinal stromal tumour  
 Gastrooesophageal reflux disease Generalised oedema  
 Genital candidiasis Genital discharge Genitourinary tract  
 neoplasm Gestational hypertension Gingival bleeding Gingival  
 infection Gingival pain Gingivitis Glaucoma Glossitis  
 Glossodynia Glucose tolerance decreased Glucose tolerance  
 impaired Glycosuria Glycosylated haemoglobin increased Goitre  
 Gout Grand mal convulsion Gravitational oedema Groin pain  
 Gynaecomastia Haemangioma Haematemesis Haematochezia

Haematocrit decreased Haematoma Haematuria Haemoglobin  
 Haemoglobin decreased Haemoglobin increased Haemolysis  
 Haemolytic anaemia Haemoptysis Haemorrhage Haemorrhage  
 intracranial Haemorrhage urinary tract Haemorrhoids  
 Haemothorax Hair disorder Hallucination Hallucination,  
 auditory Hallucination, visual Hangover Head discomfort Head  
 titubation Headache Hearing impaired Heart disease congenital  
 Heart rate irregular Hemianopia Hemiparesis Hemiplegia  
 Hepatic enzyme increased Hepatic failure Hepatic function  
 abnormal Hepatic neoplasm Hepatic neoplasm malignant Hepatic  
 steatosis Hepatitis Hepatitis cholestatic Hepatobiliary disease  
 Hepatocellular injury Hepatomegaly Hereditary disorder  
 Hernia Herpes simplex Herpes virus infection Herpes  
 zoster Hiccups Hirsutism Homicidal ideation Hordeolum  
 Hormone level abnormal Hostility Hot flush Hunger  
 Hydrocephalus Hyperacusis Hyperaemia Hyperaesthesia  
 Hyperbilirubinaemia Hyperchloraemia Hyperchlorhydria  
 Hypercholesterolaemia Hyperglycaemia Hyperhidrosis  
 Hyperinsulinism Hyperkalaemia Hyperkeratosis  
 Hyperkinesia Hyperlipidaemia Hypernatraemia  
 Hyperparathyroidism Hyperpathia Hyperphagia  
 Hyperphosphataemia Hyperplasia Hyperprolactinaemia  
 Hyperreflexia Hypersensitivity Hypersexuality Hypersomnia  
 Hypertension Hypertensive crisis Hyperthermia  
 Hyperthyroidism Hypertonia Hypertonic bladder  
 Hypertrichosis Hypertriglyceridaemia Hypertrophy  
 Hyperuricaemia Hyperuricosuria Hyperventilation  
 Hypervigilance Hypoaesthesia Hypoaesthesia oral  
 Hypocalcaemia Hypochloraemia Hypocholesterolaemia  
 Hypochromic anaemia Hypoglycaemia Hypogonadism  
 Hypohidrosis Hypokalaemia Hypokinesia Hypomagnesaemia  
 Hypomania Hypomenorrhoea Hyponatraemia Hypophagia  
 Hypoproteinaemia Hyporeflexia Hypotension Hypothermia  
 Hypothyroidism Hypotonia Hypoventilation Hypovitaminosis  
 Hypoxia Idiopathic thrombocytopenic purpura Ileus Ileus  
 paralytic Ill-defined disorder Illusion Immune system disorder  
 Impaired healing Inappropriate antidiuretic hormone secretion  
 Incontinence Increased appetite Increased bronchial  
 secretion Induration Infarction Infected cyst Infection  
 Infestation Inflammation Influenza Influenza like illness  
 Inguinal hernia Initial insomnia Injection site mass  
 Injection site pain Injection site reaction Inner ear  
 disorder Insomnia Intention tremor Intentional self-injury  
 Intermittent claudication Interstitial lung disease  
 Intervertebral disc degeneration Intervertebral disc disorder  
 Intervertebral disc protrusion Intervertebral discitis  
 Intestinal functional disorder Intestinal obstruction  
 Intestinal perforation Intracranial pressure increased Iron  
 deficiency Iron deficiency anaemia Irritability Irritable  
 bowel syndrome Ischaemia Ischaemic hepatitis Ischaemic stroke  
 Jaundice Jaundice cholestatic Joint contracture Joint  
 effusion Joint range of motion decreased Joint stiffness Joint  
 swelling Judgement impaired Keratitis Keratoconjunctivitis  
 sicca Ketoacidosis Ketonuria Ketosis Laboratory test  
 abnormal Labyrinthitis Lacrimal disorder Lacrimation increased



Lactose intolerance      Laryngeal cancer      Laryngeal disorder  
 Laryngeal neoplasm      Laryngeal oedema      Laryngitis  
 Laryngospasm      Left ventricular failure      Leiomyoma      Lens  
 disorder      Lenticular opacities      Lenticular pigmentation  
 Lethargy      Leukaemia      Leukocytoclastic vasculitis  
 Leukocytosis      Leukoderma      Leukopenia      Leukoplakia oral  
 Libido decreased      Libido increased      Lichenoid keratosis      Lip  
 and/or oral cavity cancer      Lip dry      Lip swelling      Lipoatrophy  
 Lipohypertrophy      Lipoma      Livedo reticularis      Liver  
 disorder      Liver function test abnormal      Liver injury      Lividity  
 Lobar pneumonia      Localised infection      Localised oedema  
 Logorrhoea      Loss of consciousness      Loss of libido      Lower  
 respiratory tract infection      Lung cancer metastatic      Lung disorder  
 Lung infiltration      Lung neoplasm malignant      Lymphadenitis  
 Lymphadenopathy      Lymphatic disorder      Lymphocytic leukaemia  
 Lymphocytosis      Lymphoedema      Lymphoma      Lymphopenia      Macular  
 degeneration      Macule      Maculopathy      Major depression      Malaise  
 Male sexual dysfunction      Malignant melanoma      Mania  
 Masked facies      Mass      Mastitis      Mediastinal disorder  
 Melaena      Melanocytic naevus      Memory impairment      Meniere's  
 disease      Meningitis      Menopausal symptoms      Menopause      Menorrhagia  
 Menstrual disorder      Menstruation delayed      Menstruation  
 irregular      Mental disability      Mental disorder      Mental retardation  
 Mental status changes      Metabolic alkalosis      Metastasis  
 Metastatic neoplasm      Metrorrhagia      Micturition disorder  
 Micturition urgency      Middle ear disorder      Middle ear  
 effusion      Middle insomnia      Migraine with aura      Migraine without  
 aura      Miosis      Mitral valve incompetence      Mobility decreased  
 Monarthrititis      Monocytosis      Monoplegia      Mood swings      Motion  
 sickness      Motor dysfunction      Mouth ulceration      Movement disorder  
 Multiple myeloma      Muscle atrophy      Muscle contractions  
 involuntary      Muscle contracture      Muscle enzyme increased  
 Muscle fatigue      Muscle relaxant therapy      Muscle rigidity  
 Muscle spasms      Muscle tightness      Muscle twitching      Muscular  
 weakness      Musculoskeletal chest pain      Musculoskeletal deformity  
 Musculoskeletal discomfort      Musculoskeletal disorder  
 Musculoskeletal pain      Musculoskeletal stiffness      Myalgia  
 Myasthenic syndrome      Mydriasis      Myelitis      Myocardial  
 infarction      Myocardial ischaemia      Myocarditis      Myoclonus      Myopathy  
 Myopia      Myositis      Nail disorder      Nail infection  
 Narcolepsy      Nasal congestion      Nasal disorder      Nasal dryness  
 Nasal inflammation      Nasal oedema      Nasal polyps  
 Nasopharyngitis      Nausea      Neck pain      Necrosis      Necrosis  
 ischaemic      Neoplasm      Neoplasm malignant      Neoplasm prostate  
 Neoplasm recurrence      Neoplasm skin      Nephritis  
 Nephrolithiasis      Nephrotic syndrome      Nerve root lesion  
 Nervous system disorder      Nervousness      Neuralgia      Neuritis  
 Neurodermatitis      Neurogenic bladder      Neuroleptic malignant  
 syndrome      Neurological symptom      Neuroma      Neuropathy peripheral  
 Neurosis      Neutropenia      Neutrophil count decreased      Neutrophil  
 count increased      Night sweats      Nightmare      Nocturia      Nodal  
 arrhythmia      Nodule      Normochromic normocytic anaemia      Nuchal  
 rigidity      Nystagmus      Obesity      Obsessive thoughts      Obstruction  
 Obstructive airways disorder      Ocular hyperaemia      Oculogyric crisis  
 Oedema      Oedema mouth      Oedema peripheral      Oesophageal

carcinoma Oesophageal disorder Oesophageal spasm Oesophageal  
 stenosis Oesophageal ulcer Oesophagitis Oligomenorrhoea  
 Oliguria Onychomycosis Opisthotonus Optic ischaemic  
 neuropathy Optic nerve disorder Oral candidiasis Oral neoplasm  
 benign Oral pain Oral pruritus Orchitis noninfective  
 Oropharyngeal discomfort Oropharyngeal pain  
 Oropharyngeal spasm Orthostatic hypotension  
 Osteoarthritis Osteoarthropathy Osteodystrophy  
 Osteomyelitis Osteonecrosis Osteopenia Osteoporosis  
 Otitis externa Otitis media Otitis media chronic  
 Ovarian cancer Ovarian cyst Pain Pain in extremity Pain  
 in jaw Pain of skin Pallor Palpitations  
 Pancreatitis acute Pancytopenia Panic attack Panic  
 disorder Panic disorder with agoraphobia Panic reaction  
 Papilloma Paraesthesia Paraesthesia oral Paralysis  
 Paranoia Parasomnia Parathyroid disorder Parathyroid  
 tumour Paresis Parkinsonian gait Parkinsonism Paronychia  
 Parosmia Pathological fracture Pathological gambling  
 Pelvic inflammatory disease Pelvic pain Penis disorder  
 Peptic ulcer Pericardial effusion Pericarditis  
 constrictive Perineal pain Periodontitis Periorbital  
 oedema Peripheral coldness Peripheral ischaemia Peripheral  
 vascular disorder Peritoneal adhesions Personality change  
 Personality disorder Petechiae Pharyngeal disorder  
 Pharyngeal erythema Pharyngeal haemorrhage Pharyngeal oedema  
 Pharyngitis Phlebitis Phlebitis superficial Phobia  
 Phonological disorder Phonophobia Photophobia Photopsia  
 Photosensitivity allergic reaction Photosensitivity reaction  
 Pigmentation disorder Pituitary tumour Pituitary tumour  
 benign Plasmacytoma Platelet count decreased Pleural  
 disorder Pleural effusion Pleural fibrosis Pleurisy Pleuritic  
 pain Pneumonia Pneumonia aspiration Pneumothorax Poisoning  
 Poliomyelitis Pollakiuria Polycythaemia Polydipsia  
 Polymyalgia rheumatica Polyp Polyuria Post procedural  
 infection Postmenopausal haemorrhage Postural orthostatic  
 tachycardia syndrome Posture abnormal Pre-eclampsia Precocious  
 puberty Premature ejaculation Premenstrual syndrome Presyncope  
 Priapism Prinzmetal angina Proctalgia Productive cough  
 Prolactinoma Prostate cancer Prostatic adenoma Prostatic  
 disorder Prostatitis Protein urine present Proteinuria Protrusion  
 tongue Prurigo Pruritus Pruritus generalised Pruritus  
 genital Pseudolymphoma Psoriasis Psychiatric symptom  
 Psychomotor retardation Psychotic disorder Puberty  
 Pulmonary congestion Pulmonary embolism Pulmonary  
 fibrosis Pulmonary hypertension Pulmonary oedema Pulse abnormal  
 Pulse absent Purpura Pyelonephritis Pyoderma  
 Pyuria Radiculopathy Rales Rash Rash erythematous Rash  
 generalised Rash maculo-papular Rash papular Rash pustular  
 Rash vesicular Raynaud's phenomenon Rectal cancer  
 Rectal haemorrhage Rectal tenesmus Red blood cell count  
 decreased Red blood cell sedimentation rate increased Reflexes  
 abnormal Reflux oesophagitis Regressive behaviour  
 Regurgitation Renal artery stenosis Renal colic Renal cyst  
 Renal failure acute Renal impairment Renal neoplasm Renal  
 pain Respiration abnormal Respiratory alkalosis Respiratory

arrest           Respiratory disorder   Respiratory distress   Respiratory  
 failure         Respiratory tract congestion   Respiratory tract infection  
               Respiratory tract infection viral   Restless legs syndrome  
               Retching     Retinal artery occlusion     Retinal detachment  
               Retinal disorder   Retinal vascular disorder     Retinal vascular  
 occlusion     Retinal vein thrombosis     Retinitis pigmentosa  
               Retrograde ejaculation   Retroperitoneal fibrosis  
               Rhabdomyolysis    Rheumatoid arthritis   Rhinitis     Rhinitis  
 allergic     Rhinitis seasonal   Rhinorrhoea   Rhonchi     Rosacea  
               Rotator cuff syndrome   Sacroiliitis     Saliva altered  
               Salivary duct obstruction   Salivary gland disorder  
               Salivary gland enlargement   Salivary gland pain     Salivary  
 hypersecretion   Salpingitis   Sarcoidosis   Sarcoma     Scab  
               Schizoaffective disorder   Schizophrenia     Schizophreniform  
 disorder     Sciatica     Scleral disorder   Scotoma     Seasonal allergy  
               Seborrhoeic dermatitis   Seborrhoeic keratosis   Sedation  
               Sensation of heaviness   Sensation of pressure   Sensory  
 disturbance   Sensory loss     Sepsis         Septic shock     Severe  
 acute respiratory syndrome   Sexual dysfunction     Shock  
               Sialoadenitis     Sicca syndrome   Sick sinus syndrome     Sinus  
 arrhythmia   Sinus bradycardia   Sinus congestion   Sinus disorder   Sinus  
 headache     Sinus tachycardia   Sinusitis     Skin burning sensation   Skin  
 cancer        Skin discolouration   Skin disorder     Skin exfoliation  
               Skin hyperpigmentation   Skin hypertrophy   Skin infection     Skin  
 irritation   Skin lesion   Skin mass     Skin odour abnormal     Skin  
 papilloma   Skin tightness   Skin ulcer     Skin wrinkling     Sleep  
 apnoea syndrome   Sleep attacks     Sleep disorder     Sleep talking  
               Sluggishness     Small intestinal obstruction   Sneezing  
               Snoring         Social avoidant behaviour     Somnambulism  
               Somnolence   Speech disorder   Spinal osteoarthritis   Spine  
 malformation   Splenic infarction   Splenomegaly     Spondylitis  
               Sputum increased   Squamous cell carcinoma     Status  
 epilepticus   Stevens-Johnson syndrome   Sticky skin   Stomatitis  
               Stress         Stridor         Stupor         Subarachnoid haemorrhage  
               Subcutaneous abscess   Subcutaneous nodule     Subdural  
 haematoma   Substance abuse   Sudden death     Suicidal ideation  
               Suicide attempt   Superior sagittal sinus thrombosis  
               Supraventricular extrasystoles   Supraventricular tachycardia  
               Surgery         Suspiciousness   Swelling     Swelling face  
               Swollen tongue   Syncope         Synostosis   Synovitis     Systemic  
 lupus erythematosus   Tachyarrhythmia   Tachycardia   Tachypnoea  
               Tardive dyskinesia   Temperature intolerance     Temporal  
 arteritis   Tenderness   Tendonitis   Tenosynovitis   Tension  
               Tension headache   Terminal insomnia   Testicular disorder  
               Testicular pain   Tetany         Therapeutic response decreased  
               Therapeutic response increased   Thinking abnormal   Thirst  
               Thought blocking   Throat irritation   Throat tightness  
               Thrombocytopenia   Thrombocytopenic purpura     Thrombocytosis  
               Thrombophlebitis   Thrombosis   Thrombotic thrombocytopenic  
 purpura     Thyroid adenoma   Thyroid cancer   Thyroid neoplasm  
               Thyroiditis   Tic             Tinnitus     Tongue discolouration   Tongue  
 disorder   Tongue dry   Tongue oedema   Tongue paralysis   Tongue  
 spasm   Tongue ulceration   Tonsillar hypertrophy   Tonsillitis   Tooth  
 abscess     Tooth disorder   Tooth impacted   Tooth infection  
               Toothache   Torsade de pointes     Torticollis   Toxic epidermal

necrosis Tracheitis Tracheobronchitis Transaminases increased  
Transient ischaemic attack Tremor Trismus Tuberculin  
test positive Tubulointerstitial nephritis Ulcer Ulcer haemorrhage  
Umbilical hernia Unevaluable event Unintended pregnancy  
Unresponsive to stimuli Upper respiratory tract infection  
Upper-airway cough syndrome Urethral disorder Urethral pain  
Urethritis Urinary hesitation Urinary incontinence  
Urinary retention Urinary tract disorder Urinary tract  
infection Urine abnormality Urine analysis abnormal Urine  
output increased Urogenital disorder Urosepsis Urticaria  
Uterine disorder Uterine haemorrhage Uterine leiomyoma  
Uterine neoplasm Uterovaginal prolapse VIIIth nerve paralysis  
Vaginal discharge Vaginal haemorrhage Vaginal infection  
Vaginal inflammation Varicose vein Vascular headache  
Vascular occlusion Vascular purpura Vasculitis  
Vasoconstriction Vasodilation procedure Vasospasm Vein  
disorder Venous thrombosis Ventricular arrhythmia Ventricular  
extrasystoles Ventricular failure Ventricular fibrillation  
Ventricular hypertrophy Ventricular tachycardia  
Vertigo Vestibular ataxia Vestibular disorder Viral  
diarrhoea Viral infection Vision blurred Visual acuity reduced  
Visual impairment Vitamin B12 deficiency Vitreous detachment  
Vitreous floaters Vocal cord paralysis Vomiting  
Vulvovaginal candidiasis Vulvovaginal dryness  
Vulvovaginal mycotic infection Vulvovaginal pruritus  
Vulvovaginitis Water intoxication Weight decreased  
Weight fluctuation Weight increased Wheezing White blood  
cell count decreased White blood cell count increased White blood  
cells urine positive Withdrawal bleed Withdrawal syndrome Wound  
infection Xerophthalmia Xerosis Yawning

\*\*\*\*\*  
\*\*\*\*\*

Acetylcholine receptor subunit epsilon - Group: Channel

Treated with:

galantamine: approved small molecule (160 associated side effects) For the treatment of mild to moderate dementia of the Alzheimer's type. Has also been investigated in patients with mild cognitive impairment who did not meet the diagnostic criteria for Alzheimer's disease.

160 known side effects mediated through drugs targeting this protein:

Abdominal discomfort Abdominal pain Aggression Agitation  
Anaemia Anxiety Apathy Aphasia Apraxia  
Arrhythmia Arrhythmia supraventricular Arthralgia Arthritis  
Asthenia Ataxia Atrial fibrillation Atrioventricular  
block Back pain Bladder pain Blood alkaline phosphatase  
increased Blood urea increased Body temperature increased Bone  
pain Bradycardia Bronchitis Bundle branch block Cardiac failure  
Cardiac fibrillation Cardiovascular disorder Cataract  
Cerebrovascular accident Cerebrovascular disorder Chest  
pain Coagulopathy Completed suicide Confusional state  
Constipation Convulsion Cough Cystitis Cystitis  
noninfective Decreased appetite Dehydration Delirium  
Depression Dermatitis Diarrhoea Discomfort Disturbance in

sexual arousal    Diverticulitis    Dizziness    Dry mouth    Dysgeusia  
 Dyspepsia    Dysphagia    Electrocardiogram QT prolonged  
 Electrocardiogram T wave inversion Epistaxis    Eye disorder  
 Fatigue    Feeling abnormal    Flat affect    Flatulence    Gastric  
 disorder    Gastritis    Gastroenteritis    Gastrointestinal haemorrhage  
 Gastrointestinal pain    Gravitational oedema    Haematuria  
 Haemoglobin Haemorrhage    Hallucination    Headache    Hepatic  
 enzyme increased    Hepatitis    Hepatobiliary disease    Hiccups  
 Hyperglycaemia    Hyperkinesia    Hypersensitivity    Hypersomnia  
 Hypertension    Hypertonia    Hypokalaemia    Hypokinesia  
 Hypotension    Ill-defined disorder    Immune system disorder  
 Incontinence    Infarction    Infection    Insomnia    Ischaemia  
 Lethargy    Libido increased    Liver disorder    Loss of  
 consciousness    Lower gastrointestinal haemorrhage    Malaise  
 Melaena    Mental disorder    Muscle contractions involuntary  
 disorder    Muscle spasms    Musculoskeletal discomfort    Musculoskeletal  
 disorder    Myalgia    Myocardial ischaemia    Nausea  
 Nephrolithiasis    Nervous system disorder    Nervousness  
 Neuropathy peripheral    Nightmare    Nocturia    Oedema  
 Oedema peripheral    Oesophageal disorder    Oesophageal  
 perforation    Orthostatic hypotension    Pain in extremity  
 Palpitations    Paraesthesia    Paranoia    Pneumonia  
 Pollakiuria    Purpura    Rash    Rectal haemorrhage    Renal  
 failure    Respiratory disorder    Respiratory tract infection  
 Rhinitis    Salivary hypersecretion    Shock    Somnolence  
 Suicidal ideation    Suicide attempt    Supraventricular tachycardia  
 Syncope    Tachycardia    Tension    Thrombocytopenia  
 Thrombocytosis    Tinnitus    Transient ischaemic attack  
 Tremor    Upper respiratory tract infection    Urethral disorder  
 Urinary incontinence    Urinary retention    Urinary tract disorder  
 Urinary tract infection    Vascular dementia    Vascular purpura  
 Ventricular tachycardia    Vertigo    Vision blurred  
 Vomiting    Weight decreased

\*\*\*\*\*  
 \*\*\*\*\*

Potassium channel subfamily K member 3 - Group: Channel

Treated with:

doxapram: approved    small molecule    (47 associated side effects)

For use as a temporary measure in hospitalized patients with acute respiratory insufficiency superimposed on chronic obstructive pulmonary disease.

halothane: approved    small molecule    (10 associated side effects)

For the induction and maintenance of general anesthesia

55 known side effects mediated through drugs targeting this protein:

Agitation    Albuminuria    Anxiety    Arrhythmia    Blood pressure  
 increased    Body temperature increased    Bronchospasm    Cardiac  
 arrest    Cardiac fibrillation    Cardiovascular disorder    Chest  
 discomfort    Chest pain    Chills    Clonus    Convulsion    Cough  
 Diarrhoea    Disorientation    Dizziness    Dyskinesia    Dyspnoea  
 Feeling hot    Flushing    Haemolysis    Hallucination    Headache  
 Hepatic necrosis    Hiccups    Hyperhidrosis    Hyperkinesia  
 Hyperpyrexia    Hyperreflexia    Hyperventilation    Hypotension  
 Hypoventilation    Hypoxia    Laryngospasm    Leukopenia  
 Muscle contractions involuntary    Muscle spasticity    Mydriasis

Nausea            Necrosis        Pain    Paraesthesia        Phlebitis  
Pruritus        Respiratory arrest        Respiratory failure  
Tachycardia Tachypnoea    Urinary retention    Ventricular  
fibrillation        Ventricular tachycardia        Vomiting  
\*\*\*\*\*  
\*\*\*\*\*

Nucleoside-specific channel-forming protein tsx precursor - Group: Channel

Treated with:

uridine:    experimental        small molecule        (0 associated side effects)  
deoxythymidine:    experimental        small molecule        (0 associated side effects)

known side effects mediated through drugs targeting this protein:

\*\*\*\*\*  
\*\*\*\*\*

Glucagon-like peptide 2 receptor - Group: Receptor

Treated with:

glucagon recombinant:    approved        biotech        (0 associated side effects)    For treatment of severe hypoglycemia, also used in gastrointestinal imaging

known side effects mediated through drugs targeting this protein:

\*\*\*\*\*  
\*\*\*\*\*

Serine/threonine-protein kinase receptor R3 - Group: Enzyme

Treated with:

adenosine triphosphate:        approved, nutraceutical    small molecule        (0 associated side effects)    For nutritional supplementation, also for treating dietary shortage or imbalance

known side effects mediated through drugs targeting this protein:

\*\*\*\*\*  
\*\*\*\*\*

Sodium-dependent proline transporter - Group: Transporter

Treated with:

l-proline:    approved, nutraceutical    small molecule        (0 associated side effects)    L-Proline is extremely important for the proper functioning of joints and tendons and also helps maintain and strengthen heart muscles.

known side effects mediated through drugs targeting this protein:

\*\*\*\*\*  
\*\*\*\*\*

Beta-2 adrenergic receptor - Group: Receptor

Treated with:

betaxolol:    approved        small molecule        (211 associated side effects)    For the management of hypertension.  
metoprolol:    approved        small molecule        (132 associated side effects)    For the management of acute myocardial infarction, angina

pectoris, heart failure and mild to moderate hypertension. May be used to treat supraventricular and tachyarrhythmias and as prophylaxis for migraine headaches.

norepinephrine: approved small molecule (22 associated side effects) Mainly used to treat patients in vasodilatory shock states such as septic shock and neurogenic shock and has shown a survival benefit over dopamine. Also used as a vasopressor medication for patients with critical hypotension.

timolol: approved small molecule (149 associated side effects) In its oral form it is used to treat high blood pressure and prevent heart attacks, and occasionally to prevent migraine headaches. In its ophthalmic form it is used to treat open-angle and occasionally secondary glaucoma.

dipivefrin: approved small molecule (12 associated side effects)

Dipivefrin is a prodrug which is used as initial therapy for the control of intraocular pressure in chronic open-angle glaucoma.

sotalol: approved small molecule (99 associated side effects)

For the maintenance of normal sinus rhythm [delay in time to recurrence of atrial fibrillation/atrial flutter (AFIB/AFL)] in patients with symptomatic AFIB/AFL who are currently in sinus rhythm. Also for the treatment of documented life-threatening ventricular arrhythmias.

carteolol: approved small molecule (43 associated side effects)

For the treatment of intraocular hypertension and chronic open-angle glaucoma

propranolol: approved small molecule (96 associated side effects) For the prophylaxis of migraine.

labetalol: approved small molecule (103 associated side effects) For the management of hypertension (alone or in combination with other classes of antihypertensive agents), as well as chronic stable angina pectoris and sympathetic overactivity syndrome associated with severe tetanus. Labetalol is used parenterally for immediate reduction in blood pressure in severe hypertension or in hypertensive crises when considered an emergency, for the control of blood pressure in patients with pheochromocytoma and pregnant women with preeclampsia, and to produce controlled hypotension during anesthesia to reduce bleeding resulting from surgical procedures.

bisoprolol: approved small molecule (172 associated side effects) For management of heart failure, angina pectoris, and mild to moderate hypertension and for secondary prevention of myocardial infarction (MI).

orciprenaline: approved small molecule (14 associated side effects) For the treatment of bronchospasm, chronic bronchitis, asthma, and emphysema.

dobutamine: approved small molecule (18 associated side effects)

For inotropic support in the short-term treatment of patients with cardiac decompensation due to depressed contractility resulting either from organic heart disease or from cardiac surgical procedures

pseudoephedrine: approved small molecule (0 associated side effects) For the treatment of nasal congestion, sinus congestion, Eustachian tube congestion, and vasomotor rhinitis, and as an adjunct to other agents in the optimum treatment of allergic

rhinitis, croup, sinusitis, otitis media, and tracheobronchitis.  
Also used as first-line therapy of priapism.

alprenolol: approved small molecule (0 associated side effects)

For the treatment of hypertension, angina, and arrhythmia

ritodrine: approved small molecule (0 associated side effects)

For the treatment and prophylaxis of premature labour

terbutaline: approved small molecule (33 associated side effects)  
For the prevention and reversal of bronchospasm in patients 12 years of age and older with reversible, obstructive airway disease, as well as symptomatic management of reversible bronchospasm associated with bronchitis and emphysema. Also used acute IV and sub-Q therapy in selected women to inhibit uterine contractions in preterm labor (tocolysis) and prolong gestation when beneficial.

bitolterol: withdrawn small molecule (0 associated side effects)

Used to dilate air passages in the lungs that have become narrowed as a result of disease or inflammation. It is used in the treatment of asthma and chronic obstructive pulmonary disease (COPD).

phenoxybenzamine: approved small molecule (9 associated side effects)  
For the treatment of pheochromocytoma (malignant), benign prostatic hypertrophy and malignant essential hypertension.

salmeterol: approved small molecule (113 associated side effects)  
For the treatment of asthma and chronic obstructive pulmonary disease (COPD).

pindolol: approved small molecule (95 associated side effects)

For the management of hypertension, edema, ventricular tachycardias, and atrial fibrillation.

formoterol: approved small molecule (151 associated side effects)  
For use as long-term maintenance treatment of asthma in patients 6 years of age and older with reversible obstructive airways disease, including patients with symptoms of nocturnal asthma, who are using optimal corticosteroid treatment and experiencing regular or frequent breakthrough symptoms requiring use of a short-acting bronchodilator. Not indicated for asthma that can be successfully managed with occasional use of an inhaled, short-acting beta2-adrenergic agonist. Also used for the prevention of exercise-induced bronchospasm, as well as long-term treatment of bronchospasm associated with COPD.

salbutamol: approved small molecule (153 associated side effects)  
For symptomatic relief and prevention of bronchospasm due to bronchial asthma, chronic bronchitis, and other chronic bronchopulmonary disorders such as COPD.

isoproterenol: approved small molecule (26 associated side effects)  
For the treatment of mild or transient episodes of heart block that do not require electric shock or pacemaker therapy also used in management of asthma and chronic bronchitis

arbutamine: approved small molecule (0 associated side effects)

Used to elicit acute cardiovascular responses (cardiac stimulant), similar to those produced by exercise, in order to aid in diagnosing the presence or absence of coronary artery disease (CAD) in patients who cannot exercise adequately.

carvedilol: approved small molecule (198 associated side effects)  
For the treatment of mild or moderate (NYHA class II or III) heart failure of ischemic or cardiomyopathic origin.



desipramine: approved small molecule (120 associated side effects) For relief of symptoms in various depressive syndromes, especially endogenous depression. It has also been used to manage chronic peripheral neuropathic pain, as a second line agent for the management of anxiety disorders (e.g. panic disorder, generalized anxiety disorder), and as a second or third line agent in the ADHD management.

acebutolol: approved small molecule (113 associated side effects) For the management of hypertension and ventricular premature beats in adults.

nadolol: approved small molecule (71 associated side effects) Used in cardiovascular disease to treat arrhythmias, angina pectoris, and hypertension.

levobunolol: approved small molecule (49 associated side effects) For lowering intraocular pressure (IOP) and may be used in patients with chronic open-angle glaucoma or ocular hypertension.

metipranolol: approved small molecule (38 associated side effects) Indicated in the treatment of elevated intraocular pressure in patients with ocular hypertension or open angle glaucoma.

arformoterol: approved small molecule (0 associated side effects) A bronchodilator used for the long term, symptomatic treatment of reversible bronchoconstriction in patients with chronic obstructive pulmonary disease (COPD), including chronic bronchitis and emphysema.

fenoterol: approved small molecule (0 associated side effects) Fenoterol is used for the treatment of asthma.

pirbuterol: approved small molecule (53 associated side effects) For the prevention and reversal of bronchospasm in patients 12 years of age and older with reversible bronchospasm including asthma.

bevantolol: approved small molecule (0 associated side effects) For the treatment of angina pectoris and hypertension.

penbutolol: approved small molecule (0 associated side effects) Used in the treatment of high blood pressure.

ephedra: approved, withdrawn, nutraceutical small molecule (0 associated side effects) Ephedra is widely used by athletes, despite a lack of evidence that it enhances athletic performance. Ephedra has also been used for weight loss.

procaterol: approved small molecule (0 associated side effects) For the treatment of asthma and chronic obstructive pulmonary disease (COPD).

clenbuterol: approved small molecule (0 associated side effects) Used as a bronchodilator in the treatment of asthma patients.

bambuterol: approved small molecule (0 associated side effects) For the prevention and reversal of bronchospasm in patients 12 years of age and older with asthma and reversible bronchospasm associated with bronchitis and emphysema.

oxprenolol: approved small molecule (0 associated side effects) Used in the treatment of hypertension, angina pectoris, arrhythmias, and anxiety.

nebivolol: approved small molecule (54 associated side effects) For the treatment of essential hypertension.

indacaterol: approved small molecule (0 associated side effects)

droxidopa: approved small molecule (0 associated side effects)  
 For treatment of neurogenic orthostatic hypotension (NOH) associated with various disorders including Multiple System Atrophy, Familial Amyloid Polyneuropathy, hemodialysis induced hypotension and Parkinson's Disease. Also investigated for use/treatment in neurologic disorders, nephropathy, blood (blood forming organ disorders, unspecified), and dizzy/fainting spells.

(2s)-1-(9h-carbazol-4-yloxy)-3-(isopropylamino)propan-2-ol:  
 experimental small molecule (0 associated side effects)

bopindolol: approved small molecule (0 associated side effects)  
 For the management of hypertension, edema, ventricular tachycardias, and atrial fibrillation.

bupranolol: approved small molecule (0 associated side effects)  
 Used to manage hypertension and tachycardia. Also used to treat glaucoma.

590 known side effects mediated through drugs targeting this protein:

Abdominal discomfort Abdominal distension Abdominal pain  
 Abdominal pain upper Abnormal dreams Abscess Acidosis  
 Acne Acute coronary syndrome Acute myocardial infarction  
 Acute pulmonary oedema Affect lability Ageusia Aggression  
 Agitation Agranulocytosis Alanine aminotransferase increased  
 Albuminuria Alkalosis Alopecia Altered state of  
 consciousness Amnesia Anaemia Anaphylactic shock  
 Anaphylactoid reaction Angina pectoris Angina unstable  
 Angioedema Angiopathy Anosmia Antibody test positive  
 Anxiety Aortic dissection Aphasia Aplastic anaemia  
 Appetite disorder Arrhythmia Arterial disorder Arterial  
 insufficiency Arterial stenosis Arterial thrombosis  
 Arteriosclerosis Arthralgia Arthritis Arthropathy Aspartate  
 aminotransferase increased Asthenia Asthma Ataxia  
 Atrial fibrillation Atrial flutter Atrial tachycardia  
 Atrioventricular block Atrioventricular block complete  
 Atrioventricular block second degree Back pain Balance  
 disorder Bladder dilatation Bladder pain Blepharitis  
 Blindness Blood alkaline phosphatase increased Blood  
 bilirubin increased Blood creatinine increased Blood glucose  
 increased Blood insulin increased Blood lactate dehydrogenase  
 increased Blood pressure increased Blood pressure systolic  
 increased Blood triglycerides increased Blood urea increased  
 Blood uric acid increased Body temperature increased Bone  
 disorder Bone pain Bradycardia Breast abscess Breast  
 enlargement Breast neoplasm Breast pain Bronchial obstruction  
 Bronchitis Bronchospasm Bronchospasm paradoxical  
 Bundle branch block Candidiasis Cardiac arrest Cardiac  
 disorder Cardiac failure Cardiac failure acute Cardiac failure  
 congestive Cardiac fibrillation Cardiac flutter Cardiac output  
 decreased Cardioactive drug level Cardiomegaly  
 Cardiomyopathy Cardiovascular disorder Cataract  
 Catatonia Cerebral haemorrhage Cerebral infarction  
 Cerebral ischaemia Cerebrovascular accident  
 Cerebrovascular disorder Chest discomfort Chest pain

Chills Choking Cholinergic syndrome Choreoathetosis  
 Choroidal detachment Colitis Colitis ischaemic Collagen  
 disorder Coma Confusional state Congenital eye disorder  
 Conjunctival disorder Conjunctival hyperaemia  
 Conjunctivitis Constipation Convulsion Coordination  
 abnormal Corneal staining Coronary artery disease Coronary  
 artery insufficiency Cough Crocodile tears syndrome Crystal  
 urine Crystalluria Cutaneous vasculitis Cyanosis Cystitis  
 Cystitis noninfective Cystoid macular oedema Deafness Death  
 Decreased appetite Dehydration Delusion Dependence  
 Depressed level of consciousness Depression Dermatitis  
 Dermatitis contact Dermatitis exfoliative Dermatitis  
 psoriasiform Device capturing issue Diabetes mellitus Diarrhoea  
 Diplopia Discomfort Disorientation Dissociation  
 Disturbance in attention Disturbance in sexual arousal  
 Dizziness Drug abuse Drug dependence Drug eruption Drug  
 interaction Drug level increased Dry eye Dry mouth Dry skin  
 Dry throat Dysarthria Dysgeusia Dysmenorrhoea Dyspepsia  
 Dysphagia Dysphonia Dyspnoea Dyspnoea exertional  
 Dysuria Ear disorder Ear infection Ear pain  
 Eclampsia Eczema Ejaculation failure Electrocardiogram  
 PR interval Electrocardiogram QT prolonged Electrocardiogram ST  
 segment Electrocardiogram ST segment depression Electrocardiogram  
 T wave inversion Electrocardiogram abnormal Electrocardiogram  
 change Embolism Emotional distress Encephalopathy  
 Eosinophilia Epistaxis Erectile dysfunction Eructation  
 Erythema Erythema multiforme Erythema of eyelid  
 Extrapyrarnidal disorder Extrasystoles Extravasation  
 Eye disorder Eye haemorrhage Eye infection Eye  
 irritation Eye pain Eye pruritus Eyelid ptosis Fasting  
 Fatigue Fear Feeling abnormal Feeling cold  
 Fibroadenoma of breast Fibrosis Flatulence Fluid overload  
 Fluid retention Flushing Food allergy Gait disturbance  
 Galactorrhoea Gamma-glutamyltransferase increased  
 Gangrene Gastric disorder Gastritis Gastroenteritis  
 Gastrointestinal disorder Gastrointestinal haemorrhage  
 Gastrointestinal infection Gastrointestinal pain  
 Gastrointestinal tract irritation Generalised oedema  
 Glaucoma Glossitis Glucose tolerance decreased Glycosuria  
 Gout Grand mal convulsion Gravitational oedema Growth  
 hormone deficiency Gynaecomastia Haematuria Haemoglobin  
 Haemorrhage Hallucination Headache Hearing impaired  
 Hemiplegia Hepatic enzyme increased Hepatic function  
 abnormal Hepatic necrosis Hepatitis Hepatomegaly Hernia  
 Herpes simplex Herpes virus infection Herpes zoster High  
 density lipoprotein decreased Hot flush Hyperacusis Hyperaemia  
 Hyperaesthesia Hyperbilirubinaemia Hypercalciuria  
 Hypercholesterolaemia Hyperglycaemia Hyperhidrosis  
 Hyperinsulinism Hyperkalaemia Hyperkinesia  
 Hyperlipidaemia Hypersensitivity Hypertension  
 Hyperthyroidism Hypertonia Hypertrichosis  
 Hypertriglyceridaemia Hypertrophy Hyperuricaemia  
 Hypoaesthesia Hypoglycaemia Hypokalaemia Hypokinesia  
 Hypomania Hyponatraemia Hypotension Hypothyroidism  
 Hypotonia Hypovolaemia Hypoxia Ileus paralytic Ill-

defined disorder Immune system disorder Inappropriate antidiuretic  
 hormone secretion Incontinence Increased appetite Increased  
 bronchial secretion Infarction Infection Inflammation  
 Influenza Injection site pain Injection site reaction  
 Insomnia Intermittent claudication Interstitial lung  
 disease Intraocular pressure increased Iridocyclitis  
 Iritis Irritability Ischaemia Ischaemic  
 cardiomyopathy Jaundice Jaundice cholestatic Keratitis  
 Lacrimation increased Lactic acidosis Laryngitis  
 Laryngospasm Left ventricular failure Lethargy  
 Leukaemia Leukocytoclastic vasculitis Leukocytosis  
 Leukopenia Libido decreased Lichen planus Liver disorder  
 Liver function test abnormal Local reaction Loss of  
 consciousness Loss of libido Lower respiratory tract infection  
 Lung disorder Lung neoplasm malignant Lymphadenitis  
 Lymphadenopathy Macular oedema Malaise Mediastinal  
 disorder Melaena Memory impairment Menopausal symptoms  
 Menstrual disorder Mental disability Mental disorder  
 Mesenteric artery thrombosis Metabolic acidosis Metabolic  
 disorder Micturition disorder Migraine Miosis Mood swings  
 Mouth ulceration Multiple pregnancy Muscle contracture  
 Muscle relaxant therapy Muscle rigidity Muscle spasms  
 Muscle twitching Muscular weakness Musculoskeletal discomfort  
 Musculoskeletal pain Musculoskeletal stiffness Myalgia  
 Myasthenia gravis Mydriasis Myocardial infarction Myocardial  
 ischaemia Myoclonus Myopathy toxic Myositis Nasal congestion  
 Nasopharyngitis Nausea Neck pain Necrosis Neoplasm  
 Neoplasm malignant Nephrolithiasis Nervous system  
 disorder Nervousness Neuralgia Neuroleptic malignant syndrome  
 Neuropathy peripheral Nightmare Nocturia Nodal arrhythmia  
 Nuchal rigidity Obstruction Oculomucocutaneous syndrome  
 Oedema Oedema peripheral Oliguria Oral candidiasis  
 Oropharyngeal discomfort Oropharyngeal pain Orthostatic  
 hypotension Osteoarthritis Otitis media Pain Pain in extremity  
 Pallor Palpitations Pancytopenia Paraesthesia  
 Paraesthesia oral Paralysis Paresis Parotid gland  
 enlargement Pelvic pain Pemphigoid Peptic ulcer Periodontitis  
 Peripheral coldness Peripheral ischaemia Peripheral  
 vascular disorder Personality disorder Petechiae Phaeochromocytoma  
 Pharyngitis Phlebitis Photophobia Photosensitivity reaction  
 Pigmentation disorder Pleuritic pain Pneumonia Poisoning  
 Pollakiuria Polyuria Pressure of speech Presyncope  
 Productive cough Prostatitis Protein urine present Proteinuria  
 Prothrombin level decreased Pruritus Psoriasis Psychotic  
 disorder Pulmonary congestion Pulmonary oedema Punctate  
 keratitis Pupils unequal Purpura Purpura non-thrombocytopenic  
 Pyuria Rales Rash Rash erythematous Rash generalised Rash  
 maculo-papular Rash papular Raynaud's phenomenon Rectal  
 haemorrhage Renal artery stenosis Renal colic Renal failure Renal  
 failure acute Renal impairment Renal pain Respiratory alkalosis  
 Respiratory disorder Respiratory distress Respiratory  
 failure Respiratory tract congestion Respiratory tract infection  
 Retching Retinal vascular disorder Retroperitoneal  
 fibrosis Retroperitoneal haemorrhage Rheumatoid arthritis  
 Rhinitis Rhinitis allergic Rhinorrhoea Salivary

hypersecretion Scab Scleroderma Scotoma Sedation Sensation  
of foreign body Sensory loss Serositis Sexual dysfunction  
Shock Sicca syndrome Sinoatrial block Sinus arrest Sinus  
bradycardia Sinus congestion Sinus headache Sinus rhythm Sinus  
tachycardia Sinusitis Skin discolouration Skin disorder Skin  
exfoliation Skin hyperpigmentation Skin hypertrophy Skin irritation  
Skin lesion Skin necrosis Skin ulcer Sleep disorder  
Sneezing Social avoidant behaviour Somnolence Speech  
disorder Sputum increased Status asthmaticus Stomatitis  
Stridor Stupor Subarachnoid haemorrhage Sudden  
death Supraventricular tachycardia Swelling Swelling face  
Syncope Systemic lupus erythematosus Tachyarrhythmia  
Tachycardia Talipes Tenderness Tendinous contracture  
Tendonitis Tension Testicular swelling Thinking abnormal  
Thirst Thought blocking Throat irritation Thrombocytopenia  
Thrombocytopenic purpura Thrombophlebitis Thrombosis  
Tinnitus Tongue discolouration Tongue ulceration Tooth  
abscess Toothache Toxic epidermal necrolysis Toxicity to  
various agents Tracheitis Tracheobronchitis Transaminases  
increased Tremor Type I hypersensitivity Ulcer Upper  
respiratory tract infection Urethral disorder Urinary incontinence  
Urinary retention Urinary tract disorder Urinary tract  
infection Urine abnormality Urine analysis abnormal Urine  
output increased Urogenital disorder Urticaria Uterovaginal  
prolapse Uveitis Varicella Vascular anomaly Vascular  
insufficiency Vascular purpura Vascular resistance systemic  
Vasculitis Vasoconstriction Vasodilation procedure Ventricular  
arrhythmia Ventricular extrasystoles Ventricular fibrillation  
Ventricular tachycardia Vertigo Viral diarrhoea Viral  
infection Vision blurred Visual acuity reduced Visual impairment  
Vitreous disorder Vomiting Vulvovaginal candidiasis  
Vulvovaginal mycotic infection Weight decreased Weight  
increased Wheezing Yawning

\*\*\*\*\*  
\*\*\*\*\*

Membrane protein involved in aromatic hydrocarbon degradation -  
Group: Other  
Treated with:  
(hydroxyethyloxy)tri(ethyloxy)octane: experimental small  
molecule (0 associated side effects)

known side effects mediated through drugs targeting this protein:

\*\*\*\*\*  
\*\*\*\*\*

Muscarinic acetylcholine receptor M5 - Group: Receptor  
Treated with:  
ziprasidone: approved small molecule (251 associated side  
effects) For the treatment of schizophrenia and related psychotic  
disorders.  
amitriptyline: approved small molecule (109 associated side  
effects) For the treatment of depression, chronic pain, irritable  
bowel syndrome, sleep disorders, diabetic neuropathy, agitation and  
insomnia, and migraine prophylaxis.

olanzapine: approved small molecule (393 associated side effects) For the acute and maintenance treatment of schizophrenia and related psychotic disorders, as well as acute treatment of manic or mixed episodes of bipolar 1 disorder. Intramuscular olanzapine is indicated for the rapid control of agitated patients.

metixene: approved small molecule (0 associated side effects)  
Used for the symptomatic treatment of parkinsonism.

clozapine: approved small molecule (228 associated side effects) For use in patients with treatment-resistant schizophrenia.

trihexyphenidyl: approved small molecule (43 associated side effects) Indicated for the treatment of parkinson's disease and extrapyramidal reactions caused by drugs.

promazine: approved small molecule (0 associated side effects)  
Used as an adjunct for short term treatment of moderate and severe psychomotor agitation. Also used to treat agitation or restlessness in the elderly.

imipramine: approved small molecule (100 associated side effects) For the relief of symptoms of depression and as temporary adjunctive therapy in reducing enuresis in children aged 6 years and older. May also be used to manage panic disorders, with or without agoraphobia, as a second line agent in ADHD, management of eating disorders, for short-term management of acute depressive episodes in bipolar disorder and schizophrenia, and for symptomatic treatment of postherpetic neuralgia.

darifenacin: approved small molecule (69 associated side effects) For the treatment of overactive bladder with symptoms of urge urinary incontinence, urgency and frequency.

nortriptyline: approved small molecule (91 associated side effects) For the treatment of depression, chronic pain, irritable bowel syndrome, sleep disorders, diabetic neuropathy, agitation and insomnia, and migraine prophylaxis.

atropine: approved small molecule (161 associated side effects) For the treatment of poisoning by susceptible organophosphorous nerve agents having cholinesterase activity as well as organophosphorous or carbamate insecticides.

nicardipine: approved small molecule (107 associated side effects) Used for the management of patients with chronic stable angina and for the treatment of hypertension.

paroxetine: approved small molecule (505 associated side effects) Labeled indications include: major depressive disorder (MDD), panic disorder with or without agoraphobia, obsessive-compulsive disorder (OCD), social anxiety disorder (social phobia), generalized anxiety disorder (GAD), post-traumatic stress disorder (PTSD), and premenstrual dysphoric disorder (PMDD). Unlabeled indications include: eating disorders, impulse control disorders, vasomotor symptoms of menopause, obsessive-compulsive disorder (OCD) in children, and mild dementia-associated agitation in nonpsychotic individuals.

homatropine methylbromide: approved small molecule (0 associated side effects) Used in conjunction with antacids or histamine H2-receptor antagonists in the treatment of peptic ulcers, gastric ulcers and duodenal ulcers, to reduce further gastric acid secretion and delay gastric emptying.

scopolamine: approved small molecule (22 associated side effects) For the treatment of excessive salivation, colicky abdominal pain, bradycardia, sialorrhoea, diverticulitis, irritable bowel syndrome and motion sickness.

benzquinamide: approved small molecule (0 associated side effects) Used to prevent and treat nausea and vomiting associated with anesthesia and surgery, administered intramuscularly or intravenously.

propiomazine: approved small molecule (0 associated side effects) Propiomazine is largely used for its antihistaminic sleep inducing effects in treating insomnia.

cryptenamine: approved small molecule (0 associated side effects) For the treatment of hypertension.

brompheniramine: approved small molecule (27 associated side effects) For the treatment of the symptoms of the common cold and allergic rhinitis, such as runny nose, itchy eyes, watery eyes, and sneezing.

maprotiline: approved small molecule (0 associated side effects) For treatment of depression, including the depressed phase of bipolar depression, psychotic depression, and involuntal melancholia, and may also be helpful in treating certain patients suffering severe depressive neurosis.

tolterodine: approved small molecule (51 associated side effects) For the treatment of overactive bladder (with symptoms of urinary frequency, urgency, or urge incontinence).

promethazine: approved small molecule (80 associated side effects) For the treatment of allergic disorders, and nausea/vomiting.

doxepin: approved small molecule (210 associated side effects) Labeled indications: depression and insomnia. Unlabeled indications: chronic and neuropathic pain, anxiety, idiopathic urticaria.

desipramine: approved small molecule (120 associated side effects) For relief of symptoms in various depressive syndromes, especially endogenous depression. It has also been used to manage chronic peripheral neuropathic pain, as a second line agent for the management of anxiety disorders (e.g. panic disorder, generalized anxiety disorder), and as a second or third line agent in the ADHD management.

quetiapine: approved small molecule (359 associated side effects) For the treatment of schizophrenia and related psychotic disorders.

aripiprazole: approved small molecule (630 associated side effects) For the treatment of schizophrenia and related psychotic disorders.

chlorprothixene: approved small molecule (0 associated side effects) For treatment of psychotic disorders (e.g. schizophrenia) and of acute mania occurring as part of bipolar disorders.

methotrimeprazine: approved small molecule (0 associated side effects) For the treatment of psychosis, particular those of schizophrenia, and manic phases of bipolar disorder.

solifenacin: approved small molecule (56 associated side effects) For the treatment of overactive bladder with symptoms of urge urinary incontinence, urgency, and urinary frequency.

fesoterodine: approved small molecule (50 associated side effects) For the treatment of overactive bladder (with symptoms of urinary frequency, urgency, or urge incontinence).

1016 known side effects mediated through drugs targeting this protein:

Abasia Abdominal discomfort Abdominal distension Abdominal pain  
Abdominal pain lower Abdominal pain upper Abdominal tenderness  
Abnormal dreams Abnormal faeces Abscess Accommodation disorder  
Acidosis Acne Acute coronary syndrome Acute psychosis  
Adenocarcinoma Adjustment disorder Affect lability Ageusia  
Aggression Agitation Agoraphobia Agranulocytosis Akathisia  
Akinesia Alanine aminotransferase increased Albuminuria  
Alcohol abuse Alcohol intolerance Alkalosis Alopecia  
Altered state of consciousness Alveolitis allergic Amblyopia  
Amenorrhoea Amnesia Anaemia Anaemia macrocytic Anaphylactic shock  
Anaphylactoid reaction Anger Angina pectoris Angioedema  
Angiopathy Angle closure glaucoma Anhidrosis Anisocytosis Anorectal disorder  
Anorgasmia Antinuclear antibody positive Antisocial behaviour  
Antisocial personality disorder Anxiety Aortic dissection  
Apathy Aphasia Aphthous stomatitis Aplasia Aplastic anaemia  
Apnoea Appendicitis Application site reaction Arrhythmia  
Arrhythmia supraventricular Arteriosclerosis Arteritis Arthralgia  
Arthritis Arthropathy Asocial behaviour Aspartate aminotransferase  
increased Asphyxia Aspiration Assisted fertilisation Asthenia  
Asthma Ataxia Atelectasis Athetosis Atrial fibrillation  
Atrial flutter Atrioventricular block first degree  
Atrioventricular dissociation Atrophy Azoospermia Azotaemia  
Back pain Balance disorder Basophilia Benign prostatic hyperplasia  
Bladder dilatation Bladder pain Bleeding time prolonged  
Blepharitis Blepharospasm Blindness Blister Blood alkaline phosphatase increased  
Blood bilirubin increased Blood cholesterol increased Blood creatine phosphokinase increased  
Blood creatinine increased Blood glucose decreased  
Blood glucose increased Blood insulin increased Blood lactate dehydrogenase increased  
Blood potassium decreased Blood potassium increased Blood pressure abnormal  
Blood pressure diastolic decreased Blood pressure fluctuation  
Blood pressure increased Blood pressure systolic decreased  
Blood prolactin increased Blood triglycerides increased  
Blood triglycerides normal Blood urea increased Blood uric acid increased  
Blood urine Blood urine present Blunted affect Body temperature decreased  
Body temperature increased Bone disorder Bone pain  
Bradycardia Bradykinesia Bradyphrenia Brain oedema  
Breast atrophy Breast cancer Breast cyst Breast disorder  
Breast enlargement Breast feeding Breast neoplasm  
Breast pain Bronchitis Bronchopneumopathy Bronchospasm  
Bruxism Buccoglossal syndrome Bulimia nervosa  
Bundle branch block Burning sensation Bursitis Cachexia  
Calculus urinary Candidiasis Carbohydrate tolerance decreased  
Cardiac arrest Cardiac disorder Cardiac failure Cardiac failure congestive  
Cardiac fibrillation Cardiac flutter Cardiac murmur  
Cardiac output decreased Cardio-



respiratory arrest      Cardiomegaly      Cardiomyopathy  
     Cardiopulmonary failure      Cardiovascular disorder  
     Carpal tunnel syndrome      Cataplexy      Cataract      Catatonia      Cells  
 in urine      Cellulitis      Cerebellar syndrome      Cerebral haemorrhage  
     Cerebral infarction      Cerebral ischaemia      Cerebrovascular  
 accident      Cerebrovascular disorder      Cervicitis      Cervix disorder  
     Chapped lips      Cheilitis      Chest discomfort      Chest pain  
     Chills      Cholecystitis      Cholelithiasis      Cholestasis  
     Cholinergic syndrome      Chondropathy      Chorea  
     Choreoathetosis      Chronic lymphocytic leukaemia      Chronic  
 obstructive pulmonary disease      Clonus      Coccydynia      Cognitive  
 disorder      Cogwheel rigidity      Cold sweat      Colitis      Colonic  
 obstruction      Coma      Completed suicide      Condition aggravated      Confusional  
 state      Conjunctival disorder      Conjunctival hyperaemia  
     Conjunctival oedema      Conjunctivitis      Connective tissue  
 disorder      Constipation      Conversion disorder      Convulsion  
     Coordination abnormal      Corneal lesion      Costochondritis      Cough  
     Crying      Cyanosis      Cycloplegia      Cystitis      Cystitis  
 noninfective      Deafness      Death      Decreased appetite      Decubitus  
 ulcer      Deep vein thrombosis      Deficiency anaemia      Dehydration  
     Delirium      Delusion      Dementia      Dental caries      Dependence  
     Depersonalisation      Depressed level of consciousness      Depression  
     Depressive symptom      Derealisation      Dermal cyst      Dermatitis  
 atopic      Dermatitis bullous      Dermatitis contact      Dermatitis  
 exfoliative      Diabetes mellitus      Diabetic coma      Diabetic  
 hyperglycaemic coma      Diabetic hyperosmolar coma      Diabetic  
 ketoacidosis      Diarrhoea      Diarrhoea haemorrhagic      Diplopia  
     Discomfort      Disease progression      Disorientation  
     Dissociation      Disturbance in attention      Disturbance in  
 sexual arousal      Diverticulitis      Dizziness      Dizziness exertional  
     Dizziness postural      Drooling      Drug abuse      Drug dependence  
     Drug eruption      Drug interaction      Drug withdrawal syndrome  
     Dry eye      Dry mouth      Dry skin      Dry throat      Duodenal ulcer  
     Duodenitis      Dysarthria      Dysgeusia      Dyskinesia      Dysmenorrhoea  
     Dyspepsia      Dysphagia      Dysphemia      Dysphonia      Dysphoria  
     Dyspnoea      Dystonia      Dysuria      Ear disorder      Ear  
 infection      Ear pain      Ecchymosis      Eclampsia      Eczema      Effusion  
     Ejaculation delayed      Ejaculation disorder      Elastosis  
 perforans      Elderly      Electrocardiogram      QRS complex  
     Electrocardiogram      QT prolonged      Electrocardiogram      ST segment  
     Electrocardiogram      ST segment depression      Electrocardiogram      ST  
 segment elevation      Electrocardiogram      T wave inversion      Electrocardiogram  
 abnormal      Electrocardiogram change      Electroencephalogram  
 abnormal      Elevated mood      Embolism      Emphysema      Encephalopathy  
     Endocrine disorder      Endometrial disorder      Energy increased  
     Enteritis      Enuresis      Eosinophilia      Epididymitis  
     Epilepsy      Epistaxis      Erectile dysfunction      Eructation  
     Erythema      Erythema multiforme      Erythema nodosum      Euphoric  
 mood      Exfoliative rash      Exophthalmos      Exostosis      Extensor plantar  
 response      Extrapyloric disorder      Extrasystoles  
     Extravasation      Eye discharge      Eye disorder      Eye  
 haemorrhage      Eye infection      Eye inflammation      Eye irritation      Eye  
 pain      Eyelid disorder      Eyelid function disorder      Eyelid oedema  
     Eyelid ptosis      Face oedema      Facial pain      Facial paresis  
     Faecal incontinence      Faecalith      Faecaloma      Faeces hard

Fasting      Fatigue      Fear      Feeling abnormal      Feeling cold  
 Feeling hot      Feeling jittery      Female sexual dysfunction  
 Fibrocystic breast disease      Fibrosis      Flank pain      Flat affect  
 Flatulence      Fluid retention      Flushing      Folliculitis      Food  
 interaction      Formication      Fungal infection      Fungal skin infection  
 Furuncle      Gait disturbance      Galactorrhoea      Gamma-  
 glutamyltransferase increased      Gangrene      Gastric disorder  
 Gastric pH decreased      Gastric ulcer      Gastric ulcer  
 haemorrhage      Gastritis      Gastroenteritis      Gastrointestinal disorder  
 Gastrointestinal haemorrhage      Gastrointestinal pain  
 Gastrointestinal sounds abnormal      Gastrooesophageal reflux  
 disease      Generalised oedema      Genital discharge      Genital disorder  
 female      Genital disorder male      Gingival bleeding      Gingival  
 hyperplasia      Gingival pain      Gingival recession      Gingivitis  
 Glaucoma      Globulins increased      Glomerulonephritis  
 membranous      Glossitis      Glossodynia      Glucose tolerance decreased  
 Glucose tolerance impaired      Glycosuria      Glycosylated  
 haemoglobin increased      Goitre      Gout      Grand mal convulsion      Groin  
 pain      Gynaecomastia      Haematemesis      Haematochezia      Haematocrit  
 decreased      Haematoma      Haematuria      Haemoglobin      Haemoglobin decreased  
 Haemoglobin increased      Haemoglobinuria      Haemolysis      Haemolytic  
 anaemia      Haemoptysis      Haemorrhage      Haemorrhage intracranial  
 Haemorrhagic disorder      Haemorrhoids      Hallucination  
 Hallucination, auditory      Hallucination, visual      Hangover  
 Head discomfort      Headache      Hearing impaired      Heart disease  
 congenital      Heart rate irregular      Hemiparesis      Hemiplegia      Hepatic  
 enzyme increased      Hepatic failure      Hepatic function abnormal  
 Hepatic necrosis      Hepatic steatosis      Hepatitis      Hepatobiliary  
 disease      Hepatomegaly      Hepatosplenomegaly      Hernia  
 Herpes simplex      Herpes virus infection      Herpes zoster  
 Hiccups      Hirsutism      Homicidal ideation      Hormone level  
 abnormal      Hostility      Hot flush      Hyperacusis      Hyperaesthesia  
 Hyperbilirubinaemia      Hypercalcaemia      Hyperchloraemia  
 Hyperchlorhydria      Hypercholesterolaemia      Hyperglycaemia  
 Hyperhidrosis      Hyperinsulinism      Hyperkalaemia  
 Hyperkeratosis      Hyperkinesia      Hyperlipidaemia  
 Hypermagnesaemia      Hypernatraemia      Hyperparathyroidism  
 Hyperpathia      Hyperphosphataemia      Hyperplasia  
 Hyperprolactinaemia      Hyperpyrexia      Hyperreflexia  
 Hypersensitivity      Hypersomnia      Hypertension      Hyperthermia  
 Hyperthyroidism      Hypertonia      Hypertonic bladder  
 Hypertriglyceridaemia      Hypertrophy      Hyperuricaemia  
 Hyperventilation      Hypoaesthesia      Hypoaesthesia oral  
 Hypocalcaemia      Hypochloraemia      Hypocholesterolaemia  
 Hypochromic anaemia      Hypoglycaemia      Hypohidrosis  
 Hypokalaemia      Hypokinesia      Hypomagnesaemia      Hypomania  
 Hypomenorrhoea      Hyponatraemia      Hypophagia      Hypophosphataemia  
 Hypoproteinaemia      Hyporeflexia      Hypotension      Hypothermia  
 Hypothyroidism      Hypotonia      Hypoventilation      Hypoxia  
 Idiopathic thrombocytopenic purpura      Ileitis      Ileus  
 paralytic      Ill-defined disorder      Immune system disorder  
 Immunoglobulins increased      Impaired gastric emptying  
 Inappropriate antidiuretic hormone secretion      Incontinence  
 Increased appetite      Increased bronchial secretion  
 Induration      Infarction      Infection      Infertility female

Infestation Inflammation Influenza Inguinal hernia  
 Injection site mass Injection site pain Injection site  
 phlebitis Injection site reaction Insomnia Intention tremor  
 Intentional self-injury Interstitial lung disease  
 Intestinal functional disorder Intestinal obstruction  
 Intestinal perforation Intraocular pressure increased Iron  
 deficiency Iron deficiency anaemia Irritability Irritable  
 bowel syndrome Ischaemia Ischaemic stroke Jaundice Jaundice  
 cholestatic Joint contracture Joint range of motion decreased Joint  
 stiffness Joint swelling Judgement impaired Keratitis  
 Keratoconjunctivitis sicca Ketoacidosis Ketosis  
 Lacrimation decreased Lacrimation increased Laryngeal  
 disorder Laryngitis Laryngospasm Left ventricular failure  
 Leiomyoma Lens disorder Lenticular opacities Lenticular  
 pigmentation Lethargy Leukaemia Leukocytosis Leukoderma  
 Leukopenia Leukoplakia oral Libido decreased Libido increased  
 Lip blister Lip dry Liver disorder Liver function test  
 abnormal Logorrhoea Loss of consciousness Loss of libido Lower  
 respiratory tract infection Lung adenocarcinoma stage I  
 Lymphadenitis Lymphadenopathy Lymphocyte count abnormal  
 Lymphocytic leukaemia Lymphocytosis Lymphoedema Lymphopenia  
 Major depression Malaise Male sexual dysfunction  
 Malignant melanoma Mania Masked facies Mass Mastitis  
 Mediastinal disorder Megacolon Melaena Memory impairment  
 Meningitis Menopausal symptoms Menorrhagia Menstrual  
 disorder Menstruation irregular Mental disability Mental disorder  
 Mental retardation Mental status changes Metrorrhagia  
 Microcytic anaemia Micturition disorder Micturition  
 urgency Migraine Miosis Mitral valve incompetence  
 Mobility decreased Monocytosis Mood swings Motion sickness  
 Mouth ulceration Movement disorder Muscle contractions  
 involuntary Muscle contracture Muscle enzyme increased  
 Muscle relaxant therapy Muscle rigidity Muscle spasms  
 Muscle tightness Muscle twitching Muscular weakness  
 Musculoskeletal chest pain Musculoskeletal discomfort  
 Musculoskeletal disorder Musculoskeletal pain  
 Musculoskeletal stiffness Myalgia Myasthenic syndrome  
 Mydriasis Myelitis Myocardial infarction Myocardial  
 ischaemia Myocarditis Myoclonus Myopathy Myopia Myositis  
 Nasal congestion Nasal disorder Nasal dryness  
 Nasopharyngitis Nausea Neck pain Necrosis Negativism  
 Neoplasm Neoplasm malignant Nephritis Nephrolithiasis  
 Nervous system disorder Nervousness Neuralgia Neuritis  
 Neurodermatitis Neuroleptic malignant syndrome Neuropathy  
 peripheral Neurosis Neutropenia Neutrophil count decreased  
 Neutrophil count increased Night blindness Night sweats  
 Nightmare Nocturia Nodal arrhythmia Nodal rhythm  
 Normochromic normocytic anaemia Nuchal rigidity Nystagmus  
 Obesity Obsessive thoughts Obstruction Obstructive  
 airways disorder Ocular hyperaemia Oculogyric crisis Oedema  
 Oedema peripheral Oesophageal achalasia Oesophageal disorder  
 Oesophageal ulcer Oesophagitis Oliguria Onychomycosis  
 Open angle glaucoma Opisthotonus Optic neuritis Oral  
 candidiasis Oral disorder Oral pain Orchitis noninfective  
 Orgasm abnormal Oropharyngeal discomfort Oropharyngeal

pain Oropharyngeal spasm Orthostatic hypotension  
 Osteoarthritis Osteopenia Osteoporosis Otitis externa  
 Otitis media Ovarian cyst Ovarian disorder Pain Pain  
 in extremity Pain in jaw Pallor Palpitations  
 Pancreatitis Pancreatitis acute Pancytopenia Panic  
 attack Panic disorder Panic disorder with agoraphobia Panic  
 reaction Paraesthesia oral Paralysis Paranoia Parity  
 Parkinsonian gait Parosmia Parotid gland enlargement  
 Parotitis Pathological fracture Pelvic pain Peptic ulcer  
 Pericardial effusion Pericardial haemorrhage  
 Pericarditis Periodontitis Periorbital oedema  
 Peripheral vascular disorder Peritonitis Personality disorder  
 Petechiae Pharyngeal disorder Pharyngeal erythema  
 Pharyngitis Phlebitis Phobia Phonological disorder  
 Photophobia Photopsia Photosensitivity reaction Platelet  
 count decreased Pleural disorder Pleural effusion Pneumonia  
 Pneumonia aspiration Poisoning Pollakiuria Polycythaemia  
 Polydipsia Polyp Polyuria Porphyria Postpartum disorder  
 Pregnancy Premature baby Premature delivery Premature  
 ejaculation Premenstrual syndrome Pressure of speech Presyncope  
 Priapism Productive cough Prostate cancer Prostatic  
 disorder Prostatitis Protein urine present Proteinuria Protrusion  
 tongue Pruritus Pruritus genital Psoriasis Psychiatric  
 symptom Psychomotor retardation Psychotic disorder  
 Pulmonary congestion Pulmonary embolism Pulmonary  
 fibrosis Pulmonary function test decreased Pulmonary hypertension  
 Pulmonary oedema Pupils unequal Purpura Pyelonephritis  
 Pyuria Rales Rash erythematous Rash macular Rash  
 maculo-papular Rash papular Rash pustular Rash  
 scarlatiniform Rash vesicular Rectal haemorrhage Red blood  
 cell abnormality Red blood cell count decreased Red blood cell  
 sedimentation rate increased Reflux oesophagitis Regressive  
 behaviour Renal failure acute Renal impairment Renal pain  
 Reproductive tract disorder Respiratory alkalosis Respiratory  
 arrest Respiratory depression Respiratory disorder Respiratory  
 distress Respiratory failure Respiratory tract congestion  
 Respiratory tract infection Respiratory tract infection viral  
 Restless legs syndrome Retching Retinal haemorrhage  
 Rhabdomyolysis Rheumatoid arthritis Rhinitis Rhinitis  
 allergic Rhinitis seasonal Rhinorrhoea Rhonchi Rosacea  
 Salivary gland enlargement Salivary hypersecretion  
 Salpingitis Scab Schizoaffective disorder Schizophreniform  
 disorder Sciatica Scotoma Seasonal allergy Seborrhoeic  
 dermatitis Sedation Sensation of heaviness Sensory loss  
 Sepsis Septic shock Sexual dysfunction Shock  
 Sialoadenitis Sicca syndrome Sinus arrhythmia Sinus  
 bradycardia Sinus congestion Sinus disorder Sinus headache Sinus  
 tachycardia Sinusitis Skin discolouration Skin disorder Skin  
 exfoliation Skin hypertrophy Skin irritation Skin ulcer Skin warm  
 Sleep apnoea syndrome Sleep disorder Sleep paralysis Sleep  
 talking Sluggishness Sneezing Social avoidant behaviour  
 Somnambulism Somnolence Speech disorder Sputum increased  
 Status epilepticus Stevens-Johnson syndrome Stomatitis  
 Strabismus Stridor Stupor Subarachnoid haemorrhage  
 Subdural haematoma Sudden death Suicidal ideation

Suicide attempt   Supraventricular extrasystoles  
 Supraventricular tachycardia   Surgery   Suspiciousness  
 Swelling   Swelling face   Swollen tongue   Syncope  
 Systemic lupus erythematosus   Tachycardia   Tachypnoea   Tardive  
 dyskinesia   Tearfulness   Temperature intolerance   Tenderness  
 Tendonitis   Tenosynovitis   Tension headache   Teratogenicity  
 Testicular disorder   Testicular pain   Testicular swelling  
 Tetany   Thinking abnormal   Thirst   Thought blocking  
 Throat tightness   Thrombocytopenia   Thrombocytopenic purpura  
 Thrombocytosis   Thrombophlebitis   Thrombosis   Thyroiditis   Tic  
 Tinnitus   Tongue discolouration   Tongue disorder   Tongue dry  
 Tongue oedema   Tongue paralysis   Tongue spasm   Tonsillar  
 hypertrophy   Tooth abscess   Tooth disorder   Tooth impacted   Tooth  
 infection   Tooth malformation   Toothache   Torsade de pointes  
 Torticollis   Toxic epidermal necrolysis   Tracheal disorder  
 Transaminases increased   Transient ischaemic attack  
 Tremor   Trismus   Tuberculin test positive  
 Tubulointerstitial nephritis   Ulcer   Ulcer haemorrhage   Ulcerative  
 keratitis   Unintended pregnancy   Upper respiratory tract infection  
 Urethral disorder   Urethritis   Urinary hesitation   Urinary  
 incontinence   Urinary retention   Urinary tract disorder   Urinary  
 tract infection   Urine abnormality   Urine analysis abnormal   Urine  
 output increased   Urosepsis   Urticaria   Uterine disorder   Uterine  
 haemorrhage   Uterine leiomyoma   Uterine neoplasm   Uterine spasm  
 Uterovaginal prolapse   VIIth nerve paralysis   Vaginal discharge  
 Vaginal haemorrhage   Vaginal infection   Vaginal inflammation  
 Varicose vein   Vascular headache   Vascular purpura   Vasculitis  
 Vasodilation procedure   Venous thrombosis   Ventricular arrhythmia  
 Ventricular extrasystoles   Ventricular failure   Ventricular  
 fibrillation   Ventricular flutter   Ventricular tachycardia  
 Vertigo   Viral diarrhoea   Viral infection   Vision blurred  
 Visual acuity reduced   Visual impairment   Vomiting  
 Vulvovaginal candidiasis   Vulvovaginal mycotic infection  
 Vulvovaginal pruritus   Vulvovaginitis   Water intoxication  
 Weight decreased   Weight fluctuation   Weight increased  
 Wheezing   White blood cell count decreased   White blood cell  
 count increased   White blood cell disorder   White blood cells  
 urine positive   Withdrawal syndrome   Xerophthalmia   Xerosis  
 Yawning

\*\*\*\*\*  
 \*\*\*\*\*

Low affinity immunoglobulin gamma Fc region receptor III-A - Group:  
 Receptor

Treated with:

cetuximab: approved   biotech   (0 associated side effects) For  
 treatment of EGFR-expressing metastatic colorectal cancer in  
 patients who are refractory to other irinotecan-based chemotherapy  
 regimens. Cetuximab is also indicated for treatment of squamous cell  
 carcinoma of the head and neck in conjunction with radiation  
 therapy.

etanercept: approved   biotech   (0 associated side effects) For  
 treatment of severe active rheumatoid arthritis in adults, severe  
 juvenile idiopathic arthritis, ankylosing spondylitis, and severe  
 plaque psoriasis.

intravenous immunoglobulin: approved biotech (0 associated side effects) IVIg is used in the treatment of immunodeficiencies, as well as autoimmune and inflammatory disorders. These indications includes idiopathic thrombocytopenic purpura, Kawasaki disease, hypogammaglobulinemia, B cell chronic lymphocytic leukemia, bone marrow transplant complications, Guillain-Barré syndrome, chronic inflammatory demyelinating polyneuropathy (CIDP), multiple sclerosis, rheumatoid arthritis, myasthenia gravis, Wiskott-Aldrich syndrome and inflammatory skin diseases.

adalimumab: approved biotech (0 associated side effects) For treatment of rheumatoid arthritis, psoriatic arthritis, ankylosing spondylitis, and Crohn's disease.

abciximab: approved biotech (0 associated side effects)

gemtuzumab ozogamicin: approved biotech (0 associated side effects) For treatment of CD33-positive acute myeloid leukemia in patients 60 and over who are not candidates for other chemotherapy.

trastuzumab: approved biotech (0 associated side effects)

For treatment of early stage HER2-positive breast cancer, or metastatic breast cancer that substantially overexpress HER2.

rituximab: approved biotech (0 associated side effects) For treatment of CD20-positive non-Hodgkins lymphoma, chronic lymphocytic leukemia, and rheumatoid arthritis.

basiliximab: approved biotech (0 associated side effects)

For prophylactic treatment of kidney transplant rejection

muromonab: approved biotech (0 associated side effects) For treatment of organ transplant recipients, prevention of organ rejection

ibrutumomab: approved biotech (0 associated side effects)

For treatment of non-Hodgkin's lymphoma

tositumomab: approved biotech (0 associated side effects)

For treatment of non-Hodgkin's lymphoma (CD20 positive, follicular)

alemtuzumab: approved biotech (0 associated side effects)

Alemtuzumab (Campath) is a monoclonal antibody therapy used for treatment of B-cell chronic lymphocytic leukemia.

alefacept: approved biotech (0 associated side effects) As an immunosuppressive drug, Alefacept can be used for treatment of moderate to severe chronic plaque psoriasis

efalizumab: approved biotech (0 associated side effects) For the treatment of adult patients with moderate to severe chronic plaque psoriasis, who are candidates for phototherapy or systemic therapy.

natalizumab: approved biotech (0 associated side effects)

For treatment of multiple sclerosis.

palivizumab: approved biotech (0 associated side effects)

For prophylaxis of respiratory diseases caused by respiratory syncytial virus.

daclizumab: approved biotech (0 associated side effects)

Zenapax is a humanized monoclonal antibody used for prevention of renal transplant rejection

bevacizumab: approved biotech (0 associated side effects)

As part of combination therapy for metastatic colorectal cancer and HER2-negative metastatic breast cancer.

known side effects mediated through drugs targeting this protein:

\*\*\*\*\*  
\*\*\*\*\*

Sodium- and chloride-dependent glycine transporter 1 - Group:

Transporter

Treated with:

glycine: approved, nutraceutical small molecule (38 associated side effects) Supplemental glycine may have antispastic activity. Very early findings suggest it may also have antipsychotic activity as well as antioxidant and anti-inflammatory activities.

38 known side effects mediated through drugs targeting this protein:

Acidosis Agitation Angina pectoris Back pain Blindness  
Blindness transient Chills Coma Convulsion Dehydration  
Diarrhoea Dizziness Dry mouth Electrolyte imbalance  
Encephalopathy Fluid overload Hyperammonaemia  
Hyperkinesia Hypersensitivity Hyponatraemia Hypotension  
Lung disorder Nausea Oedema Pain Polyuria  
Pulmonary congestion Respiratory tract congestion Rhinitis  
Salivary hypersecretion Tachycardia Thirst  
Thrombophlebitis Urinary retention Urticaria Vertigo  
Visual impairment Vomiting

\*\*\*\*\*  
\*\*\*\*\*

Outer membrane protein p64k or PM-6 - Group: Enzyme

Treated with:

flavin-adenine dinucleotide: experimental small molecule (0 associated side effects)

known side effects mediated through drugs targeting this protein:

\*\*\*\*\*  
\*\*\*\*\*

Vasopressin V2 receptor - Group: Receptor

Treated with:

desmopressin: approved small molecule (0 associated side effects) Oral formulations may be used to manage primary nocturnal enuresis in adults and vasopressin sensitive diabetes insipidus, and for control of temporary polyuria and polydipsia following head trauma or surgery in the pituitary region. Intranasal and parenteral formulations may be used to manage spontaneous or trauma-induced bleeds (e.g. hemarthrosis, intramuscular hematoma, mucosal bleeding) in patients with hemophilia A or von Willebrand's disease Type I. May also be used parenterally to prevent or treat bleeding in patients with uremia.

conivaptan: approved small molecule (58 associated side effects)

For the treatment of euvolemic or hypervolemic hyponatremia (e.g. the syndrome of inappropriate secretion of antidiuretic hormone, or in the setting of hypothyroidism, adrenal insufficiency, pulmonary disorders, etc.) in hospitalized patients.

terlipressin: approved small molecule (0 associated side effects) Commonly used to stop bleeding of varices in the food pipe (oesophagus).

58 known side effects mediated through drugs targeting this protein:  
 Anaemia Angiopathy Aortic dissection Arrhythmia Arrhythmia  
 supraventricular Atrial fibrillation Body temperature increased  
 Candidiasis Cardiac disorder Cardiac fibrillation Confusional  
 state Constipation Dehydration Diarrhoea Dry mouth  
 Electrocardiogram ST segment Electrocardiogram ST segment  
 depression Erythema Feeling abnormal Gastrointestinal disorder  
 Haematuria Headache Hyperglycaemia Hypertension  
 Hypoglycaemia Hypokalaemia Hypomagnesaemia  
 Hyponatraemia Hypotension Infection Infestation Infusion  
 site reaction Insomnia Mediastinal disorder Mental disorder  
 Nausea Nervous system disorder Oedema Oedema  
 peripheral Oral candidiasis Oropharyngeal pain Orthostatic  
 hypotension Pain Phlebitis Pneumonia Pollakiuria Polyuria Post  
 procedural diarrhoea Pruritus Sepsis Swelling Thirst  
 Toxic epidermal necrolysis Urethral disorder Urinary tract  
 disorder Urinary tract infection Urine output increased  
 Vomiting

\*\*\*\*\*  
 \*\*\*\*\*

Nuclear receptor subfamily 1 group I member 3 - Group: Receptor  
 Treated with:  
 16,17-androstene-3-ol: experimental small molecule (0  
 associated side effects)  
 (5beta)-pregnane-3,20-dione: experimental small molecule (0  
 associated side effects)

known side effects mediated through drugs targeting this protein:

\*\*\*\*\*  
 \*\*\*\*\*

ATP-sensitive inward rectifier potassium channel 1 - Group: Channel  
 Treated with:  
 bethanidine: approved small molecule (0 associated side  
 effects) For the treatment of hypertension.  
 glimepiride: approved small molecule (59 associated side  
 effects) For concomitant use with insulin for the treatment of  
 noninsulin-dependent (type 2) diabetes mellitus.  
 minoxidil: approved small molecule (62 associated side effects)  
 For the treatment of severe hypertension and in the topical  
 treatment (regrowth) of androgenic alopecia in males and females and  
 stabilisation of hair loss in patients with androgenic alopecia.  
 acetohexamide: approved small molecule (0 associated side  
 effects) Used in the management of diabetes mellitus type 2  
 (adult-onset).  
 tolazamide: approved small molecule (32 associated side effects)  
 For use as an adjunct to diet to lower the blood glucose in  
 patients with non-insulin dependent diabetes mellitus (Type II)  
 whose hyperglycemia cannot be satisfactorily controlled by diet  
 alone.  
 glyburide: approved small molecule (52 associated side effects)  
 Indicated as an adjunct to diet to lower the blood glucose in  
 patients with NIDDM whose hyperglycemia cannot be satisfactorily  
 controlled by diet alone.



tolbutamide: approved small molecule (0 associated side effects) For treatment of NIDDM (non-insulin-dependent diabetes mellitus) in conjunction with diet and exercise.  
glycodiazine: approved small molecule (0 associated side effects) Glycodiazine is used concomitantly with insulin for the treatment of noninsulin-dependent (type 2) diabetes mellitus.

121 known side effects mediated through drugs targeting this protein:

Abdominal distension Abdominal pain Agranulocytosis Anaemia  
Angioedema Aplastic anaemia Arthralgia Asthenia Back pain  
Blood alkaline phosphatase increased Blood creatinine  
increased Blood pressure increased Body temperature increased  
Breast tendernessBronchitis Burning sensationChest discomfort  
Chest pain Cholestasis Cough Decreased appetite Dermatitis  
atopic Dermatitis bullous Diarrhoea Discomfort Dizziness  
Dry mouth Dry skin Dyspepsia Dyspnoea Eczema  
Effusion Erythema Erythropenia Fatigue Feeling  
abnormal Fluid retention Folliculitis Gastrointestinal  
disorder Gastrointestinal pain Haemolytic anaemia Hair growth  
abnormal Headache Hepatic failure Hepatic function abnormal  
Hepatitis Hot flush Hyperhidrosis Hypersensitivity  
Hypertrichosis Hypoglycaemia Hyponatraemia  
Hypopituitarism Hypotension Ill-defined disorder  
Inappropriate antidiuretic hormone secretion Increased  
appetite Infection Influenza Insomnia Jaundice Jaundice  
cholestatic Laboratory test abnormal Leukocytoclastic vasculitis  
Leukopenia Ligament disorder Liver disorder Malaise  
Malnutrition Menopausal symptoms Muscle spasms  
Musculoskeletal discomfort Myalgia Nasopharyngitis  
Nausea Nephropathy Nervous system disorder Nervousness  
Nocturia Oedema Oropharyngeal discomfort  
Oropharyngeal pain Pain Pain in extremity Palpitations  
Pancytopenia Paraesthesia Pericardial effusion  
Pericarditis Photosensitivity reaction Pigmentation  
disorder Pollakiuria Porphyria Porphyria non-acute Pruritus  
Purpura Rash Respiratory tract infection Rhinitis  
Rhinitis seasonal Sciatica Seasonal allergy Seborrhoeic  
dermatitis Shock Sinusitis Skin exfoliation Tachycardia Tenderness  
Tension Thrombocytopenia Tremor Urticaria Vascular  
purpura Vasculitis Vasodilation procedure Vertigo Virilism  
Vision blurred Visual impairment Vomiting Weight increased

\*\*\*\*\*  
\*\*\*\*\*

N-arachidonyl glycine receptor - Group: Receptor

Treated with:

glycine: approved, nutraceutical small molecule (38 associated side effects) Supplemental glycine may have antispastic activity. Very early findings suggest it may also have antipsychotic activity as well as antioxidant and anti-inflammatory activities.

38 known side effects mediated through drugs targeting this protein:

Acidosis Agitation Angina pectoris Back pain Blindness  
Blindness transient Chills Coma Convulsion Dehydration  
Diarrhoea Dizziness Dry mouth Electrolyte imbalance

Encephalopathy    Fluid overload    Hyperammonaemia  
Hyperkinesia      Hypersensitivity    Hyponatraemia      Hypotension  
Lung disorder      Nausea            Oedema            Pain    Polyuria  
Pulmonary congestion    Respiratory tract congestion    Rhinitis  
Salivary hypersecretion      Tachycardia    Thirst  
Thrombophlebitis    Urinary retention    Urticaria    Vertigo  
Visual impairment    Vomiting

\*\*\*\*\*  
\*\*\*\*\*

Colicin I receptor - Group: Transporter

Treated with:

n-octyl-2-hydroxyethyl sulfoxide: experimental      small molecule  
(0 associated side effects)  
lauryl dimethylamine-n-oxide:      experimental      small molecule  
(0 associated side effects)

known side effects mediated through drugs targeting this protein:

\*\*\*\*\*  
\*\*\*\*\*

Hepatitis B virus receptor binding protein - Group: Receptor

Treated with:

(1r)-1-phenylethyl 4-(acetylamino)benzylphosphonate:  
experimental      small molecule      (0 associated side effects)

known side effects mediated through drugs targeting this protein:

\*\*\*\*\*  
\*\*\*\*\*

Calcium-activated potassium channel subunit beta-1 - Group: Channel

Treated with:

miconazole: approved      small molecule      (33 associated side effects)

For topical application in the treatment of tinea pedis (athlete&rsquo;s foot), tinea cruris, and tinea corporis caused by &lt;i>Trichophyton rubrum&/i>, &lt;i>Trichophyton mentagrophytes&/i>, and &lt;i>Epidermophyton floccosum&/i>, in the treatment of cutaneous candidiasis (moniliasis), and in the treatment of tinea versicolor.

33 known side effects mediated through drugs targeting this protein:

Abdominal pain    Anaphylactic shock    Anaphylactoid reaction  
Angioedema    Breast disorder    Burning sensation    Cardiac disorder  
Dermatitis    Dermatitis contact    Erythema    Gastrointestinal  
pain    Genital burning sensation    Genital discharge    Headache  
Immune system disorder    Muscle spasms    Nausea    Nervous  
system disorder    Oedema    Pain    Pelvic pain    Pruritus    genital Rash  
Respiratory disorder    Respiratory tract infection    Upper  
respiratory tract infection    Urethral disorder    Urinary tract disorder  
Urinary tract infection    Urticaria    Vaginal discharge  
Vulvovaginal discomfort    Vulvovaginal erythema

\*\*\*\*\*  
\*\*\*\*\*

Progesterone receptor - Group: Receptor

Treated with:

etonogestrel: approved small molecule (0 associated side effects) For use as a female contraceptive (depot).

desogestrel: approved small molecule (0 associated side effects) For the prevention of pregnancy in women who elect to use this product as a method of contraception.

megestrol: approved small molecule (97 associated side effects)  
For the treatment of anorexia, cachexia, or an unexplained, significant weight loss in patients with a diagnosis of acquired immunodeficiency syndrome (AIDS). Also used for the palliative management of recurrent, inoperable, or metastatic breast cancer, endometrial cancer, and prostate cancer in Canada and some other countries.

levonorgestrel: approved small molecule (187 associated side effects) For the treatment of menopausal and postmenopausal disorders and alone or in combination with other hormones as an oral contraceptive.

dydrogesterone: approved small molecule (0 associated side effects) Used to treat irregular duration of cycles and irregular occurrence and duration of periods caused by progesterone deficiency. Also used to prevent natural abortion in patients who have a history of habitual abortions.

fluticasone propionate: approved small molecule (0 associated side effects) For the maintenance treatment of asthma as prophylactic therapy and for patients requiring oral corticosteroid therapy for asthma.

medroxyprogesterone: approved small molecule (373 associated side effects) Used as a contraceptive and to treat secondary amenorrhea, abnormal uterine bleeding, pain associated with endometriosis, endometrial and renal cell carcinomas, paraphilia in males, GnRH-dependent forms of precocious puberty, as well as to prevent endometrial changes associated with estrogens.

norethindrone: approved small molecule (0 associated side effects) For use as an oral contraceptive in the prevention of pregnancy.

ethynodiol diacetate: approved small molecule (0 associated side effects) For the prevention of pregnancy in women who elect to use this product as a method of contraception.

mifepristone: approved small molecule (50 associated side effects) For the medical termination of intrauterine pregnancy through 49 days' pregnancy. Also indicated to control hyperglycemia secondary to hypercortisolism in adult patients with endogenous Cushing's syndrome who have type 2 diabetes mellitus or glucose intolerance.

norgestimate: approved small molecule (0 associated side effects) For the prevention of pregnancy

drospirenone: approved small molecule (0 associated side effects) For the prevention of pregnancy in women who elect an oral contraceptive.

danazol: approved small molecule (89 associated side effects)  
For the treatment of endometriosis and fibrocystic breast disease (in patients unresponsive to simple measures). Also used for the prophylactic treatment of all types of hereditary angioedema in males and females.

allylestrenol: approved small molecule (0 associated side effects) Allylestrenol was designed to be used for miscarriage

prevention, prevention of premature labour and has been investigated for possible use in men for treatment for benign prostatic hyperplasia.

methyltrienolone:experimental small molecule (0 associated side effects)

tanaproget:experimental small molecule (0 associated side effects)

norelgestromin: approved small molecule (0 associated side effects) Norelgestromin is used for contraception and menopausal hormonal therapy. Norelgestromin may potentially be used in breast cancer treatment due to its inhibitory effect on estrone sulfatase . They convert sulfated steroid precursors to estrogen during pregnancy.

564 known side effects mediated through drugs targeting this protein:

Abdominal discomfort Abdominal distension Abdominal mass  
Abdominal pain Abdominal pain lower Abortion missed  
Abortion spontaneous Abscess Abscess sterile Acne Acute  
coronary syndromeAcute leukaemia Acute psychosis Acute respiratory  
distress syndromeAcute tonsillitisAdenoma benign Adrenal disorder  
Adrenal insufficiency Affect lability Aggression Agitation  
Alanine aminotransferase increasedAlbuminuriaAlcohol poisoning  
Alopecia Amblyopia AmenorrhoeaAmnesia Anaemia  
Anaphylactic shock Anaphylactoid reaction Anencephaly  
Angina pectoris Angioedema Angiopathy Anorectal disorder  
Anorgasmia Anosmia Anovulatory cycleAntepartum haemorrhage  
Anxiety Aortic dissectionAppendicitis Application site  
reaction Arrhythmia Arterial thrombosis Arthralgia Arthritis  
Aspartate aminotransferase increased Assisted fertilisation  
Asthenia Asthma Ataxia Atrophy Attention  
deficit/hyperactivity disorder Autonomic neuropathy Back pain  
Balance disorder Benign breast neoplasm Benign hydatidiform  
mole Benign intracranial hypertension Bladder pain Blighted  
ovum Blindness Blister Blood alkaline phosphatase increased  
Blood disorder Blood glucose decreased Blood glucose  
increased Blood insulin increased Blood lactate dehydrogenase  
increased Blood oestrogen decreased Blood pressure increased  
Blood testosterone decreasedBlood triglycerides increased  
Blood urineBlood urine present Body temperature increased  
Bone disorder Bone pain BradycardiaBreast cancer  
Breast discharge Breast disorder Breast enlargement  
Breast feeding Breast massBreast neoplasm Breast pain  
Breast swelling Breast tendernessBromosulphthalein test  
abnormal Bronchitis Bronchospasm Cachexia Candidiasis  
Carbohydrate tolerance decreased Cardiac disorder Cardiac  
failure Cardiac septal defect Cardiomyopathy Cardiovascular  
disorder Carpal tunnel syndrome Cataract Cerebral artery  
thrombosis Cerebral haemorrhage Cerebral infarction Cerebral  
ischaemia Cerebral thrombosis Cerebral venous thrombosis  
Cerebrovascular accident Cervical dysplasia Cervicitis  
Cervix carcinoma Cervix disorder Chapped lips Chest pain  
Chills Chloasma Choking CholangitisCholelithiasis  
CholestasisChorea Cleft lip Cleft palate Confusional  
state Congenital anomaly Congenital diaphragmatic hernia

Congenital megacolon    Conjunctivitis    Connective tissue  
 disorder    Constipation    Convulsion    Coronary artery thrombosis  
 Cough    Crying    Cushingoid    Cystitis    Cystitis noninfective  
 Deafness    Death    Decreased appetite    Deep vein thrombosis  
 Deformity    Dementia    Depersonalisation    Depressed level of  
 consciousness    Depressed mood    Depression    Dermatitis    Dermatitis  
 bullous    Dermatitis contact    Developmental delay    Diabetes  
 mellitus    Diaphragmatic hernia    Diarrhoea    Diplopia    Discomfort  
 Disorientation    Disturbance in attention    Disturbance in  
 sexual arousal    Dizziness    Drug interaction    Dry mouth    Dry skin  
 Dysarthria    Dysgeusia    Dysmenorrhoea    Dyspareunia    Dyspepsia  
 Dysphagia    Dysphemia    Dysphonia    Dysplasia    Dyspnoea  
 Dysuria    Ear infection    Ear malformation    Ear pain  
 Eating disorder    Ectopic pregnancy    Ectropion of cervix  
 Eczema    Electrocardiogram QT prolonged    Embolism  
 Embolism venous    Endocrine disorder    Endometrial cancer  
 Endometriosis    Endometritis    Eosinophilia    Epilepsy  
 Epistaxis    Erectile dysfunction    Eructation    Erythema  
 Erythema multiforme    Erythema nodosum    Eye disorder  
 Eyelid ptosis    Face oedema    Fatigue    Feeling abnormal  
 Feeling drunk    Fibroadenoma of breast    Fibrocystic breast  
 disease    Fistula    Flatulence    Fluid retention    Flushing  
 Foetor hepaticus    Folliculitis    Fungal infection    Gait  
 disturbance    Galactorrhoea    Gallbladder disorder    Gastric disorder  
 Gastritis    Gastroenteritis    Gastrointestinal disorder  
 Gastrointestinal pain    Genital candidiasis    Genital discharge  
 Genital infection    Genital ulceration    Gingival bleeding  
 Glucose tolerance decreased    Glucose tolerance impaired  
 Growth retardation    Gynaecomastia    Haemangioma    Haematoma  
 Haematuria    Haemoglobin    Haemoglobin decreased    Haemolytic  
 anaemia    Haemorrhage    Haemorrhagic disorder    Haemorrhoids  
 Headache    Hearing impaired    Heart disease congenital  
 Hepatic adenoma    Hepatic enzyme increased    Hepatic failure  
 Hepatic function abnormal    Hepatic necrosis    Hepatic neoplasm  
 Hepatitis cholestatic    Hepatobiliary disease    Hepatocellular  
 injury    Hepatomegaly    Hereditary disorder    Hernia  
 Herpes simplex    Herpes virus infection    Hirsutism    Hormone  
 level abnormal    Hot flush    Hydrocephalus    Hydrops foetalis  
 Hypercalcaemia    Hyperglycaemia    Hyperhidrosis  
 Hyperinsulinism    Hyperkinesia    Hypernatraemia  
 Hypersensitivity    Hypertension    Hyperthyroidism    Hypertonia  
 Hypertrichosis    Hypertriglyceridaemia    Hypertrophy  
 Hyperventilation    Hypoaesthesia    Hypocalcaemia    Hypochromic  
 anaemia    Hypoglycaemia    Hypokalaemia    Hypomenorrhoea  
 Hypopituitarism    Hypospadias    Hypotension    Hypothyroidism    IIIrd  
 nerve paralysis    Ill-defined disorder    Immune system disorder  
 Incontinence    Increased appetite    Infarction    Infection  
 Infestation    Influenza    Influenza like illness    Injection site  
 atrophy    Injection site pain    Injection site reaction  
 Insomnia    Interstitial lung disease    Intestinal infarction  
 Intracranial pressure increased    Irritability    Ischaemia  
 Ischaemic neuropathy    Jaundice    Jaundice cholestatic  
 Jaundice neonatal    Joint swelling    Laboratory test abnormal  
 Laryngeal oedema    Laryngospasm    Lethargy    Leukaemia  
 Leukocytosis    Leukopenia    Libido decreased    Libido increased

Limb deformity Liver disorder Liver function test abnormal  
 Loss of consciousness Lung disorder Lymphadenopathy  
 Lymphatic disorder Macular oedema Malaise Malignant  
 melanoma Mass Mastitis Mediastinal disorder Medical device  
 complication Megacolon Melanocytic naevus Memory impairment  
 Meningioma Menometrorrhagia Menopausal symptoms Menorrhagia  
 Menstrual disorder Menstruation delayed Menstruation  
 irregular Mental disabilityMental disorder Metrorrhagia  
 Microcephaly Microsomia Migraine Mood swings Mouth  
 ulceration Muscle spasms Muscle twitching Muscular weakness  
 Musculoskeletal discomfort Musculoskeletal disorder  
 Musculoskeletal pain Myalgia Myocardial infarction  
 Myoclonus Myopathy Nasal congestion Nasopharyngitis  
 Nausea Necrosis Neoplasm malignant Nephritis  
 Nephrolithiasis Nephrotic syndrome Nervous system  
 disorder Nervousness Neuritis Neurofibroma Neuropathy  
 peripheral Night sweats Nocturia Oedema Oedema peripheral  
 Oesophageal atresia Oesophageal disorder Oestrogen  
 deficiency Oligomenorrhoea Optic ischaemic neuropathy Optic  
 neuritis Oral candidiasis Oropharyngeal blistering  
 Oropharyngeal discomfort Oropharyngeal pain Orthostatic  
 hypotensionOsteoarthritis Osteonecrosis Osteoporosis  
 Osteoporotic fracture Otitis media Ovarian cancer  
 Ovarian cyst Ovarian disorder Ovarian failure Ovarian  
 hyperstimulation syndrome Pain Pain in extremityPalpitations  
 Pancreatitis acute Papilloedema Papilloma  
 Paraesthesia Paralysis Parametritis Paranoia  
 Patent ductus arteriosus Peliosis hepatis Pelvic  
 inflammatory disease Pelvic painPericarditis Perineal pain  
 Personality disorder Pharyngitis Photosensitivity reaction  
 Pneumonia Pollakiuria Polycythaemia Polydactyly Polydipsia  
 Polyhydramnios Polymenorrhoea Polyp Porphyria Porphyria  
 acute Premature baby Premature menopause Premenstrual syndrome  
 Protein urine present ProteinuriaPruritus Pruritus genital  
 Psychotic disorder Pulmonary embolism Purpura Rash  
 Rash generalised Rash pustular Rectal haemorrhage Renal  
 infarct Renal neoplasm Respiratory disorder Respiratory  
 distress Respiratory tract infection Retinal vein occlusion  
 Rhinitis Ruptured ectopic pregnancy Salivary gland  
 enlargementSalivary hypersecretion Salpingitis Sarcoma  
 Sciatica Scleroderma Seborrhoeic dermatitis Sedation  
 Sensory loss Sepsis Shock Sickle cell anaemia with  
 crisis Single umbilical artery Sinusitis Skin  
 discolouration Skin disorder Skin haemorrhage Skin odour  
 abnormal Skin papilloma Skin tightness Skull malformation  
 Sleep disorder Smear cervix abnormal Somnolence Speech  
 disorder Spina bifida Splenic infarction Squamous cell  
 carcinoma Stillbirth Stomatitis Stupor Sudden infant death  
 syndrome Suicidal ideationSupraventricular tachycardia Swelling  
 Swollen tongue Syncope Tachycardia Talipes Tearfulness  
 Tenderness Tendonitis Tension Thinking abnormalThirst  
 Throat tightness Thrombocytopenia Thrombocytopenic purpura  
 Thrombophlebitis Thrombophlebitis superficial Thrombosis  
 Thrombotic thrombocytopenic purpura Thyroiditis Tinnitus  
 Tonsillitis Tooth disorder Toothache Toxic epidermal

necrosis Tracheo-oesophageal fistula Transaminases increased  
 Transient ischaemic attack Tremor Trisomy 21  
 Tubulointerstitial nephritis Tumour flare Ulcer Upper  
 respiratory tract infection Urethral disorder Urinary incontinence  
 Urinary retention Urinary tract disorder Urinary tract  
 infection Urticaria Uterine cervical erosion Uterine cyst  
 Uterine disorder Uterine enlargement Uterine haemorrhage  
 Uterine leiomyoma Uterine perforation Uterine spasm  
 Uterovaginal prolapse VIIth nerve paralysis Vaginal cyst  
 Vaginal discharge Vaginal dysplasia Vaginal haemorrhage  
 Vaginal infection Vaginal inflammation Vaginal neoplasm  
 Vaginitis bacterial Varicose vein Vascular purpura Vein  
 pain Venous occlusion Venous thrombosis Ventricular septal defect  
 Vertigo Viral infection Vision blurred Visual acuity  
 reduced Visual impairment Vomiting Vulval abscess Vulval  
 disorder Vulvovaginal candidiasis Vulvovaginal discomfort  
 Vulvovaginal dryness Vulvovaginal mycotic infection  
 Vulvovaginal pruritus Vulvovaginitis Weight decreased  
 Weight increased Xerophthalmia

\*\*\*\*\*  
 \*\*\*\*\*

Sodium channel protein type 11 subunit alpha - Group: Channel

Treated with:

cocaine: illicit, approved small molecule (13 associated side effects) For the introduction of local (topical) anesthesia of accessible mucous membranes of the oral, laryngeal and nasal cavities.

zonisamide: approved small molecule (190 associated side effects) For use as adjunctive treatment of partial seizures in adults with epilepsy.

195 known side effects mediated through drugs targeting this protein:

Abdominal pain Abnormal dreams Acne Agitation Alanine  
 aminotransferase increased Albuminuria Alopecia Amblyopia  
 Amenorrhoea Anaemia Anxiety Apnoea Arthralgia  
 Arthritis Aspartate aminotransferase increased Asthenia  
 Ataxia Atrial fibrillation Bladder pain Blood  
 lactate dehydrogenase increased Bradycardia Calculus bladder  
 Cardiac failure Cardiac fibrillation Cerebrovascular  
 accident Chest pain Cholangitis Cholecystitis Cholelithiasis  
 Cognitive disorder Colitis Confusional state  
 Conjunctivitis Constipation Convulsion Coordination  
 abnormal Cough Deafness Death Decreased appetite Dehydration  
 Depressed level of consciousness Dermatitis Dermatitis  
 bullous Diarrhoea Diplopia Discomfort Disturbance in sexual  
 arousal Dizziness Dry mouth Dry skin Duodenal ulcer  
 Duodenitis Dysarthria Dysgeusia Dyskinesia Dyspepsia  
 Dysphagia Dyspnoea Dystonia Dysuria Ecchymosis  
 Eczema Embolism Encephalopathy Enuresis Erectile  
 dysfunction Euphoric mood Extrasystoles Face oedema Faecal  
 incontinence Fatigue Feeling abnormal Flank pain Flatulence  
 Gait disturbance Gastritis Gastroenteritis Gastrointestinal  
 pain Gingival bleeding Gingival hyperplasia Gingivitis Glaucoma  
 Glossitis Gynaecomastia Haematemesis Haematuria

Haemoglobin Haemoptysis Haemorrhage Headache Hirsutism  
 Hyperaesthesia Hyperhidrosis Hyperkinesia Hyperplasia  
 Hyperreflexia Hypersensitivity Hypertension Hypertonia  
 Hypoglycaemia Hypokinesia Hyponatraemia Hypotension  
 Hypotonia Ill-defined disorder Immunodeficiency  
 Incontinence Influenza Insomnia Iritis  
 Irritability Jaundice Jaundice cholestatic Leukopenia  
 Libido decreased Loss of consciousness Lymphadenopathy  
 Malaise Mastitis Melaena Menorrhagia Microcytic  
 anaemia Micturition urgency Mouth ulceration Movement disorder  
 Muscle relaxant therapy Muscle rigidity Muscle spasms  
 Muscle twitching Muscular weakness Musculoskeletal discomfort  
 Musculoskeletal stiffness Myalgia Mydriasis Myoclonus  
 Nausea Nervousness Neuritis Neuropathy peripheral  
 Nocturia Nuchal rigidity Nystagmus Oculogyric crisis  
 Oedema Oedema peripheral Oesophagitis Osteoarthritis  
 Pain Palpitations Paraesthesia oral Paralysis Parosmia  
 Petechiae Pharyngitis Photophobia Pollakiuria Polyuria  
 Pruritus Psychotic disorder Pulmonary embolism Rash  
 Rash maculo-papular Rash pustular Rectal haemorrhage  
 Respiratory failure Rhinitis Scotoma Sensitisation  
 Shock Somnolence Speech disorder Stomatitis Syncope  
 Systemic lupus erythematosus Tachycardia Tension Thirst  
 Thrombocytopenia Thrombophlebitis Tinnitus Tremor Ulcer  
 Urinary incontinence Urinary retention Urine output increased  
 Urticaria VIIth nerve paralysis Vascular insufficiency  
 Vasoconstriction Ventricular extrasystoles Vertigo  
 Vomiting Weight decreased Weight increased

\*\*\*\*\*  
\*\*\*\*\*

Nicotinic acid receptor 1 - Group: Receptor

Treated with:

niacin: approved, nutraceutical small molecule (0 associated  
 side effects) For the treatment of type IV and V hyperlipidemia.  
 It is indicated as adjunctive therapy.

known side effects mediated through drugs targeting this protein:

\*\*\*\*\*  
\*\*\*\*\*

Tyrosine-protein phosphatase non-receptor type 1 - Group: Enzyme

Treated with:

tiludronate: approved small molecule (60 associated side  
 effects) For treatment of Paget's disease of bone (osteitis  
 deformans).

3-(oxalyl-amino)-naphthalene-2-carboxylic acid: experimental  
 small molecule (0 associated side effects)

double oxidized cysteine: experimental small molecule (0  
 associated side effects)

compound 12, n-acetyl-4-[(carboxycarbonyl)(2-carboxyphenyl)amino]-n-  
 pentyl-1-naphthylalaniamide: experimental small molecule (0  
 associated side effects)

compound 9: experimental small molecule (0 associated side  
 effects)



2-(oxalyl-amino)-4,7-dihydro-5h-thieno[2,3-c]thiopyran-3-carboxylic acid: experimental small molecule (0 associated side effects)

3-(3,5-dibromo-4-hydroxy-benzoyl)-2-ethyl-benzofuran-6-sulfonic acid (4-sulfamoyl-phenyl)-amide: experimental small molecule (0 associated side effects)

[[4-(aminomethyl)phenyl]amino]oxo-acetic acid,: experimental small molecule (0 associated side effects)

2-{4-[(2s)-2-[[[(1s)-1-carboxy-2-phenylethyl]amino]carbonyl]amino]-3-oxo-3-(pentylamino)propyl]phenoxy}malonic acid: experimental small molecule (0 associated side effects)

compound 19: experimental small molecule (0 associated side effects)

sp7343-sp7964: experimental small molecule (0 associated side effects)

2-(oxalyl-amino)-benzoic acid: experimental small molecule (0 associated side effects)

{[2-(1h-1,2,3-benzotriazol-1-yl)-2-(3,4-difluorophenyl)propane-1,3-diyl]bis[4,1-phenylene(difluoromethylene)]}bis(phosphonic acid): experimental small molecule (0 associated side effects)

novo nordisk a/s compound: experimental small molecule (0 associated side effects)

n-[4-(2-{2-[3-(2-bromo-acetyl-amino)-propionyl-amino]-3-hydroxy-propionyl-amino}-ethyl)-phenyl]-oxalamic acid: experimental small molecule (0 associated side effects)

7-(1,1-dioxo-1h-benzo[d]isothiazol-3-yloxymethyl)-2-(oxalyl-amino)-4,7-dihydro-5h-thieno[2,3-c]pyran-3-carboxylic acid: experimental small molecule (0 associated side effects)

pnul77836: experimental small molecule (0 associated side effects)

{[7-(difluoro-phosphono-methyl)-naphthalen-2-yl]-difluoro-methyl}-phosphonic acid: experimental small molecule (0 associated side effects)

3-(3,5-dibromo-4-hydroxy-benzoyl)-2-ethyl-benzofuran-6-sulfonic acid [4-(thiazol-2-ylsulfamoyl)-phenyl]-amide: experimental small molecule (0 associated side effects)

4-benzoylamino-4-{1-{1-carbamoyl-2-[4-(difluoro-phosphono-methyl)-phenyl]-ethylcarbamoyl}-2-[4-(difluoro-phosphono-methyl)-phenyl]-ethylcarbamoyl}-butyric acid: experimental small molecule (0 associated side effects)

n-{1-[5-(1-carbamoyl-2-mercapto-ethylcarbamoyl)-pentylcarbamoyl]-2-[4-(difluoro-phosphono-methyl)-phenyl]-ethyl}-3-{2-[4-(difluoro-phosphono-methyl)-phenyl]-acetyl-amino}-succinamic acid: experimental small molecule (0 associated side effects)

cysteinesulfonic acid: experimental small molecule (0 associated side effects)

2-(oxalyl-amino)-4,5,6,7-tetrahydro-thieno[2,3-c]pyridine-3-carboxylic acid: experimental small molecule (0 associated side effects)

4-carbamoyl-4-{[6-(difluoro-phosphono-methyl)-naphthalene-2-carbonyl]-amino}-butyric acid: experimental small molecule (0 associated side effects)

compound 5, 2-(naphthalen-1-yl-oxalyl-amino)-benzoic acid: experimental small molecule (0 associated side effects)

6-(oxalyl-amino)-1h-indole-5-carboxylic acid: experimental small molecule (0 associated side effects)

n-(allyloxycarbonyl)-4-[n-(carboxy-formyl)-2-(benzoic acid)-amino]-1-phenylalaninyl-amino-butyloxy-(6-hydroxy-benzoic acid methyl ester): experimental small molecule (0 associated side effects)

3-(3,5-dibromo-4-hydroxy-benzoyl)-2-ethyl-benzofuran-6-sulfonic acid dimethylamide: experimental small molecule (0 associated side effects)

[(4-{4-[4-(difluoro-phosphono-methyl)-phenyl]-butyl}-phenyl)-difluoro-methyl]-phosphonic acid: experimental small molecule (0 associated side effects)

{4-[(2s,4e)-2-(1,3-benzothiazol-2-yl)-2-(1h-1,2,3-benzotriazol-1-yl)-5-phenylpent-4-enyl]phenyl}(difluoro)methylphosphonic acid: experimental small molecule (0 associated side effects)

2-(carboxymethoxy)-5-[(2s)-2-[(2s)-2-[(3-carboxypropanoyl)amino]-3-phenylpropanoyl]amino)-3-oxo-3-(pentylamino)propyl]benzoic acid: experimental small molecule (0 associated side effects)

1-methyl-3-phenyl-1h-pyrazol-5-ylsulfamic acid: experimental small molecule (0 associated side effects)

4-bromo-3-(carboxymethoxy)-5-[3-(cyclohexylamino)phenyl]thiophene-2-carboxylic acid: experimental small molecule (0 associated side effects)

3(s)-methylcarbamoyl-7-sulfoamino-3,4-dihydro-1h-isoquinoline-2-carboxylic acid tert-butyl ester: experimental small molecule (0 associated side effects)

4-bromo-3-(carboxymethoxy)-5-phenylthiophene-2-carboxylic acid: experimental small molecule (0 associated side effects)

5-(4-chloro-5-phenyl-3-thienyl)-1,2,5-thiadiazolidin-3-one 1,1-dioxide: experimental small molecule (0 associated side effects)

4-bromo-3-(carboxymethoxy)-5-(4-hydroxyphenyl)thiophene-2-carboxylic acid: experimental small molecule (0 associated side effects)

[{2-bromo-4-[(2r)-3-oxo-2,3-diphenylpropyl]phenyl}(difluoro)methyl]phosphonic acid: experimental small molecule (0 associated side effects)

5-[3-(benzylamino)phenyl]-4-bromo-3-(carboxymethoxy)thiophene-2-carboxylic acid: experimental small molecule (0 associated side effects)

2-[(7-hydroxy-naphthalen-1-yl)-oxalyl-amino]-benzoic acid: experimental small molecule (0 associated side effects)

3-(carboxymethoxy)thieno[2,3-b]pyridine-2-carboxylic acid: experimental small molecule (0 associated side effects)

4-phosphonooxy-phenyl-methyl-[4-phosphonooxy]benzen: experimental small molecule (0 associated side effects)

n-acetyl-1-phenylalanyl-4-[difluoro(phosphono)methyl]-1-phenylalaninamide: experimental small molecule (0 associated side effects)

3(r)-methylcarbamoyl-7-sulfoamino-3,4-dihydro-1h-isoquinoline-2-carboxylic acid tert-butyl ester: experimental small molecule (0 associated side effects)

5-(3-hydroxyphenyl)isothiazol-3(2h)-one 1,1-dioxide: experimental small molecule (0 associated side effects)

5-(3-{3-[3-hydroxy-2-(methoxycarbonyl)phenoxy]propenyl}phenyl)-4-(hydroxymethyl)isoxazole-3-carboxylic acid: experimental small molecule (0 associated side effects)

isothiazolidinone analog: experimental small molecule (0 associated side effects)  
 4-[3-(dibenzylamino)phenyl]-2,4-dioxobutanoic acid: experimental small molecule (0 associated side effects)  
 para-(benzoyl)-phenylalanine: experimental small molecule (0 associated side effects)  
 6-(difluoro-phosphono-methyl)-naphthalene-2-carboxylic acid: experimental small molecule (0 associated side effects)  
 (3r)-methylcarbamoyl-7-sulfoamino-3,4-dihydro-1h-isoquinoline-2-carboxylic acid benzyl ester: experimental small molecule (0 associated side effects)  
 5-(4-methoxybiphenyl-3-yl)-1,2,5-thiadiazolidin-3-one 1,1-dioxide: experimental small molecule (0 associated side effects)  
 1,2,5-thiadiazolidin-3-one-1,1-dioxide: experimental small molecule (0 associated side effects)  
 (4-{{(2s)-2-[(tert-butoxycarbonyl)amino]-3-methoxy-3-oxopropyl}phenyl)methaneseleninic acid: experimental small molecule (0 associated side effects)

60 known side effects mediated through drugs targeting this protein:

Abdominal pain Anxiety Arthralgia Arthropathy Asthenia Back pain  
 Bronchitis Cataract Chest pain Conjunctivitis  
 Constipation Cough Decreased appetite Dermatitis  
 Diarrhoea Dizziness Dry mouth Dyspepsia Fatigue  
 Flatulence Flushing Gastritis Gastrointestinal pain  
 Glaucoma Gravitational oedema Headache Hyperhidrosis  
 Hyperparathyroidism Hypertension Infection Influenza  
 Insomnia Loss of consciousness Muscle contractions  
 involuntary Musculoskeletal discomfort Nausea Nervousness  
 Oedema Oedema peripheral Osteoarthritis Pain  
 Paraesthesia Pathological fracture Pharyngitis Pruritus  
 Rash Respiratory tract infection Rhinitis Shock Sinusitis  
 Skin disorder Somnolence Syncope Tension Tooth  
 disorder Upper respiratory tract infection Urinary tract  
 infection Vertigo Vitamin D deficiency Vomiting

\*\*\*\*\*  
 \*\*\*\*\*

Voltage-dependent L-type calcium channel subunit alpha-1D - Group:  
 Channel

Treated with:

isradipine: approved small molecule (0 associated side effects)  
 For the management of mild to moderate essential hypertension.

It may be used alone or concurrently with thiazide-type diuretics.  
 amlodipine: approved small molecule (136 associated side effects)  
 For the treatment of hypertension and chronic stable angina.

nimodipine: approved small molecule (47 associated side effects)  
 For use as an adjunct to improve neurologic outcome following subarachnoid hemorrhage (SAH) from ruptured intracranial berry aneurysms by reducing the incidence and severity of ischemic deficits.

nisoldipine: approved small molecule (161 associated side effects)  
 For the treatment of hypertension. It may be used alone or in combination with other antihypertensive agents.

cinnarizine: approved small molecule (0 associated side effects) For the treatment of vertigo/meniere's disease, nausea and vomiting, motion sickness and also useful for vestibular symptoms of other origins.

nicardipine: approved small molecule (107 associated side effects) Used for the management of patients with chronic stable angina and for the treatment of hypertension.

verapamil: approved small molecule (113 associated side effects) For the treatment of hypertension, angina, and cluster headache prophylaxis.

felodipine: approved small molecule (96 associated side effects) For the treatment of mild to moderate essential hypertension.

nitrendipine: approved small molecule (0 associated side effects) For the treatment of mild to moderate hypertension

nifedipine: approved small molecule (217 associated side effects) For the management of vasospastic angina, chronic stable angina, hypertension, and Raynaud's phenomenon. May be used as a first line agent for left ventricular hypertrophy and isolated systolic hypertension (long-acting agents).

mibefradil: withdrawn small molecule (0 associated side effects) For the treatment of angina and high blood pressure.

nilvadipine: approved small molecule (0 associated side effects) For the management of vasospastic angina, chronic stable angina and hypertension.

367 known side effects mediated through drugs targeting this protein:

Abdominal discomfort Abdominal pain Abnormal dreams  
 Accommodation disorder Acidosis Acne Acute coronary  
 syndrome Acute generalised exanthematous pustulosis Affect  
 lability Agitation Alanine aminotransferase increased Alopecia  
 Amblyopia Amnesia Anaemia Anaphylactic shock  
 Angina pectoris Angioedema Angiopathy Anxiety Anxiety  
 disorder Apathy Arrhythmia Arteriosclerosis Arthralgia  
 Arthritis Arthropathy Asthenia Asthma Ataxia  
 Atrial fibrillation Atrioventricular block complete  
 Atrioventricular block first degree Atrioventricular  
 dissociation Back pain Balance disorder Bezoar Blepharitis  
 Blindness Blindness transient Blister Blood alkaline  
 phosphatase increased Blood lactate dehydrogenase increased Blood  
 pressure increased Blood prolactin increased Blood urea  
 increased Blood uric acid Body temperature increased Bradycardia  
 Breast engorgement Breast pain Bronchitis Bronchospasm  
 Cardiac arrest Cardiac disorder Cardiac failure congestive  
 Cardiac fibrillation Cardiac murmur Cardiogenic shock  
 Cardiomyopathy Cellulitis Cerebral ischaemia  
 Cerebrovascular accident Chest discomfort Chest pain  
 Chills Cholestasis Chronic obstructive pulmonary disease  
 Cold sweat Colitis Coma Confusional state Conjunctivitis  
 Constipation Convulsion Coombs direct test positive Cough  
 Crocodile tears syndrome Decreased appetite Deep vein  
 thrombosis Depersonalisation Depressive symptom Dermatitis  
 Dermatitis bullous Dermatitis exfoliative Diabetes mellitus  
 Diarrhoea Diplopia Discomfort Disease progression  
 Disseminated intravascular coagulation Dissociation

Disturbance in attention      Disturbance in sexual arousal  
 Dizziness postural      Dry mouth      Dry skin      Dysgeusia  
 Dyspepsia      Dysphagia      Dyspnoea      Dysuria      Ear disorder  
 Ear infection      Ear pain      Ecchymosis      Effusion  
 Electrocardiogram ST segment Electrocardiogram ST segment  
 depression Electrocardiogram T wave inversion Electrocardiogram  
 abnormal      Eosinophilia      Epistaxis      Erectile dysfunction  
 Eructation      Erythema      Erythema multiforme      Erythema nodosum  
 Erythromelalgia      Extrapyrarnidal disorder      Extrasystoles  
 Eye disorder      Eye haemorrhage      Eye pain      Eye pruritus  
 Face oedema      Fasting      Fatigue      Feeling abnormal      Feeling  
 cold      Feeling hot      Feeling jittery      Flat affect      Flatulence      Fluid  
 retention      Flushing      Fungal skin infection      Galactorrhoea  
 Gamma-glutamyltransferase increased      Gastritis  
 Gastrointestinal disorder      Gastrointestinal haemorrhage  
 Gastrointestinal obstruction      Gastrointestinal pain  
 Gastrointestinal tract irritation      Gastrooesophageal reflux  
 disease      Gingival bleeding      Gingival disorder      Gingival hyperplasia  
 Glaucoma      Glomerulonephritis      membranous      Glossitis      Gout  
 Gynaecomastia      Haematoma      Haematuria      Haemoglobin      Haemolysis  
 Haemolytic anaemia      Haemorrhage      Haemorrhage intracranial  
 Headache      Hepatic enzyme increased      Hepatic function  
 abnormal      Hepatitis      Hepatitis cholestatic      Hepatomegaly  
 Herpes simplex      Herpes virus infection      Herpes zoster      Hot  
 flush      Hyperaemia      Hyperglycaemia      Hyperhidrosis      Hyperkeratosis  
 Hyperkinesia      Hyperplasia      Hyperprolactinaemia  
 Hypersensitivity      Hypertension      Hypertonia      Hypertrophic  
 cardiomyopathy      Hypertrophy      Hypoaesthesia      Hypokalaemia  
 Hyponatraemia      Hypophosphataemia      Hypotension      Hypoxia      Ileus  
 paralytic      Ill-defined disorder      Incontinence      Increased  
 appetite      Infarction      Infection      Inflammation      Influenza  
 Injection site pain      Injection site reaction      Insomnia  
 Intermittent claudication      Irritability      Ischaemia  
 Jaundice      Joint stiffness      Joint swelling      Keratitis  
 Laboratory test abnormal      Lacrimation increased      Laryngitis  
 Laryngospasm      Lethargy      Leukocytoclastic vasculitis  
 Leukopenia      Libido decreased      Liver function test abnormal      Loss  
 of consciousness      Lung disorder      Lymphadenopathy      Macule  
 Malaise      Melaena      Menopausal symptoms      Menstrual  
 disorder      Mental disability      Metabolic acidosis      Micturition  
 disorder      Micturition urgency      Migraine      Mood swings      Mouth  
 ulceration      Muscle fatigue      Muscle spasms      Muscle twitching  
 Muscular weakness      Musculoskeletal discomfort      Musculoskeletal  
 stiffness      Myalgia      Myocardial infarction      Myocardial ischaemia  
 Myositis      Nasal congestion      Nasopharyngitis      Nausea      Neck  
 pain      Nephrolithiasis      Nervousness      Neuropathy peripheral      Nightmare  
 Nocturia      Nystagmus      Obstruction      Obstructive airways disorder  
 Oedema      Oedema peripheral      Oesophagitis      Oligomenorrhoea  
 Oliguria      Oropharyngeal discomfort      Oropharyngeal pain  
 Orthostatic hypotension      Osteoarthritis      Otitis media  
 Pain      Pain in extremity      Palpitations      Pancreatitis  
 Paraesthesia      Paralysis      Paranoia      Parosmia      Pelvic pain  
 Pericardial haemorrhage      Pericarditis      Periorbital  
 oedema      Peripheral ischaemia      Peripheral vascular disorder  
 Petechiae      Pharyngitis      Phlebitis      Photosensitivity reaction

Platelet count decreased    Pleural disorder    Pleural effusion  
 Poisoning    Pollakiuria    Polyuria    Pruritus    Psychotic  
 disorder    Pulmonary congestion    Pulmonary oedema    Purpura  
 Quadriparesis    Rales    Rash    Rash erythematous    Rash maculo-  
 papular    Rash pustular    Regurgitation    Renal failure    Renal  
 failure chronic    Renal impairment    Respiratory disorder    Respiratory  
 failure    Respiratory tract congestion    Respiratory tract infection  
 Retinal detachment    Rhinitis    Rhinorrhoea    Salivary gland  
 enlargement    Sensory loss    Sexual dysfunction    Shock    Sinus  
 arrest    Sinus arrhythmia    Sinusitis    Skin discolouration    Skin  
 ulcer    Sleep disorder    Sneezing    Somnolence    Sticky skin    Stomatitis  
 Stridor    Supraventricular tachycardia    Syncope    Tachycardia  
 Tenderness    Tenosynovitis    Tension    Thinking abnormal  
 Thirst    Thrombocytopenia    Thrombophlebitis    Thrombosis  
 Thyroiditis    Tinnitus    Toxic epidermal necrolysis    Tremor  
 Ulcer    Upper respiratory tract infection    Urinary incontinence  
 Urine output increased    Urogenital disorder    Urticaria  
 Vaginal haemorrhage    Vaginal infection    Vaginal inflammation  
 Vascular purpura    Vasculitis    Vasodilation procedure    Vasospasm  
 Venous insufficiency    Venous thrombosis    Ventricular arrhythmia  
 Ventricular extrasystoles    Ventricular tachycardia  
 Vertigo    Vision blurred    Visual acuity reduced    Visual  
 impairment    Vitreous floaters    Vomiting    Weight decreased    Weight  
 increased    Wheezing    Xerophthalmia

\*\*\*\*\*  
 \*\*\*\*\*

Receptor activity-modifying protein 2 - Group: Other

Treated with:

pramlintide:    approved    biotech    (17 associated side effects)

For the treatment of type 1 and type 2 diabetes mellitus as an adjunct to preprandial insulin therapy in patients without adequate glycemic control of insulin therapy.

17 known side effects mediated through drugs targeting this protein:

Abdominal pain    Arthralgia    Asthenia    Cough    Decreased appetite  
 Dizziness    Fatigue    Gastrointestinal pain    Headache  
 Hypersensitivity    Hypoglycaemia    Injection site reaction  
 Musculoskeletal discomfort    Nausea    Pain    Pharyngitis  
 Vomiting

\*\*\*\*\*  
 \*\*\*\*\*

Cytokine receptor common beta chain - Group: Receptor

Treated with:

sargramostim:    approved    biotech    (0 associated side effects)

For the treatment of cancer and bone marrow transplant  
 alpha-d-mannose: experimental    small molecule    (0 associated side effects)

known side effects mediated through drugs targeting this protein:

\*\*\*\*\*  
 \*\*\*\*\*

Cystic fibrosis transmembrane conductance regulator - Group:

Transporter

Treated with:

bumetanide: approved small molecule (50 associated side effects)

For the treatment of edema associated with congestive heart failure, hepatic and renal disease including the nephrotic syndrome.  
glyburide: approved small molecule (52 associated side effects)

Indicated as an adjunct to diet to lower the blood glucose in patients with NIDDM whose hyperglycemia cannot be satisfactorily controlled by diet alone.

adenosine-5'-diphosphate: experimental small molecule (0 associated side effects)

phosphoaminophosphonic acid-adenylate ester: experimental small molecule (0 associated side effects)

phosphoserine: experimental small molecule (0 associated side effects)

ivacaftor: approved small molecule (0 associated side effects)

For the treatment of cystic fibrosis (CF) in patients age 6 years and older who have a G551D mutation in the CFTR gene.

87 known side effects mediated through drugs targeting this protein:

- Abdominal discomfort Abdominal distension Abdominal pain
- Agranulocytosis Anaemia Angioedema Aplastic anaemia
- Arthralgia Asterixis Asthenia Azotaemia Blood creatinine increased
- Blood uric acid increased Chest pain Cholestasis
- Dehydration Dermatitis Diarrhoea Discomfort Dizziness Dry mouth
- Dyspepsia Dyspnoea Ear discomfort Emotional distress
- Encephalopathy Erythema Erythropenia Fatigue
- Foetor hepaticus Gastric disorder Gastrointestinal disorder
- Gastrointestinal pain Haemolytic anaemia Headache
- Hearing impaired Hepatic failure Hepatic function abnormal
- Hepatitis Hepatocellular injury Hyperglycaemia
- Hyperhidrosis Hypersensitivity Hyperuricaemia
- Hyperventilation Hypochloraemia Hypokalaemia
- Hyponatraemia Hypopituitarism Hypotension Inappropriate antidiuretic hormone secretion
- Jaundice Jaundice cholestatic
- Leukocytoclastic vasculitis Leukopenia Liver disorder
- Malnutrition Muscle spasms Musculoskeletal discomfort
- Musculoskeletal pain Myalgia Nausea Nephropathy
- Nervous system disorder Nipple pain Pain Pancytopenia
- Photosensitivity reaction Polyuria Porphyria Porphyria
- non-acute Premature ejaculation Pruritus Purpura Rash Renal failure
- Shock Tenderness Thrombocytopenia Toxic epidermal necrolysis
- Urticaria Vascular purpura Vasculitis Vertigo
- Vision blurred Visual impairment Vomiting

\*\*\*\*\*  
\*\*\*\*\*

Cationic amino acid transporter 3 - Group: Transporter

Treated with:

l-lysine: approved, nutraceutical small molecule (0 associated side effects)  
Supplemental L-lysine has putative anti-herpes simplex virus activity. There is preliminary research suggesting that it may have some anti-osteoporotic activity.

l-arginine: approved, nutraceutical small molecule (20 associated side effects)  
Used for nutritional supplementation, also for treating dietary shortage or imbalance.

l-ornithine: approved, nutraceutical small molecule (0 associated side effects)  
Used for nutritional supplementation,

also for treating dietary shortage or imbalance. It has been claimed that ornithine improves athletic performance, has anabolic effects, has wound-healing effects, and is immuno-enhancing.

20 known side effects mediated through drugs targeting this protein:

Anaphylactic shock      Cyanosis      Dermatitis      Extravasation  
Flushing      Haematuria      Headache      Hypersensitivity  
Hypoaesthesia      Nausea      Necrosis      Platelet count  
decreased      Rash      Rash macular      Sensory loss      Skin exfoliation  
Skin necrosis      Surgery      Swelling      Vomiting

\*\*\*\*\*  
\*\*\*\*\*

Atrial natriuretic peptide receptor B - Group: Enzyme

Treated with:

erythryl tetranitrate:      approved      small molecule      (0 associated side effects)      For the prevention of angina.  
nesiritide: approved      biotech      (0 associated side effects)      For the intravenous treatment of patients with acutely decompensated congestive heart failure who have dyspnea at rest or with minimal activity.

known side effects mediated through drugs targeting this protein:

\*\*\*\*\*  
\*\*\*\*\*

Gamma-hydroxybutyrate receptor - Group: Receptor

Treated with:

gamma hydroxybutyric acid:      illicit,approved small molecule      (0 associated side effects)      Used as a general anesthetic, to treat conditions such as insomnia, clinical depression, narcolepsy, and alcoholism, and to improve athletic performance.

known side effects mediated through drugs targeting this protein:

\*\*\*\*\*  
\*\*\*\*\*

Glycine receptor subunit alpha-3 - Group: Channel

Treated with:

glycine:      approved,nutraceutical small molecule      (38 associated side effects)      Supplemental glycine may have antispastic activity. Very early findings suggest it may also have antipsychotic activity as well as antioxidant and anti-inflammatory activities.

lindane:      approved      small molecule      (9 associated side effects)

For the treatment of patients infested with *Sarcoptes scabiei* or pediculosis capitis who have either failed to respond to adequate doses, or are intolerant of other approved therapies.

picROTOXIN: approved      small molecule      (0 associated side effects)

Used internally for relieving respiratory distress. Also for use as an antidote in poisoning by CNS depressants, especially barbiturates.

ivermectin: approved      small molecule      (47 associated side effects)

For the treatment of intestinal (i.e., nondisseminated) strongyloidiasis due to the nematode parasite *Strongyloides stercoralis*. Also for the treatment of onchocerciasis (river blindness) due to the nematode parasite *Onchocerca*



volvulus</i>. Can be used to treat scabies caused by  
<i>Sarcoptes scabiei</i>.

77 known side effects mediated through drugs targeting this protein:

Abdominal distension Abdominal pain Abnormal sensation in eye  
Acidosis Agitation Alopecia Anaemia Angina pectoris  
Arthralgia Asthenia Asthma Back pain Blindness  
Blindness transient Body temperature increased Chest  
discomfort Chest pain Chills Chorioretinitis Choroiditis Coma  
Conjunctivitis Constipation Convulsion Decreased  
appetite Dehydration Dermatitis contact Diarrhoea Discomfort  
Dizziness Dry mouth Electrolyte imbalance Encephalopathy  
Eyelid oedema Fatigue Fluid overload Gastrointestinal  
pain Headache Hyperammonaemia Hyperkinesia Hypersensitivity  
Hypertrophy Hyponatraemia Hypotension Iridocyclitis  
Keratitis Leukopenia Lung disorder Lymphadenopathy  
Musculoskeletal discomfort Nausea Oedema Orthostatic  
hypotension Pain Paraesthesia Polyuria Pruritus Pulmonary  
congestion Rash Respiratory tract congestion Rhinitis Salivary  
hypersecretion Somnolence Synovitis Tachycardia Tenderness  
Thirst Thrombophlebitis Toxic epidermal necrolysis  
Tremor Urinary retention Urticaria Uveitis Vertigo  
Visual impairment Vomiting White blood cell count decreased

\*\*\*\*\*  
\*\*\*\*\*

Macrophage colony-stimulating factor 1 receptor - Group: Enzyme  
Treated with:

imatinib: approved small molecule (248 associated side  
effects) For the treatment Philadelphia chromosome positive  
chronic myeloid leukemia (CML) and malignant gastrointestinal  
stromal tumors (GIST).  
sunitinib: approved small molecule (198 associated side  
effects) For the treatment of advanced renal cell carcinoma as  
well as the treatment of gastrointestinal stromal tumor after  
disease progression on or intolerance to imatinib mesylate.  
5-cyano-furan-2-carboxylic acid [5-hydroxymethyl-2-(4-methyl-  
piperidin-1-yl)-phenyl]-amide: experimental small molecule  
(0 associated side effects)  
6-chloro-3-(3-methylisoxazol-5-yl)-4-phenylquinolin-2(1h)-one:  
experimental small molecule (0 associated side effects)

357 known side effects mediated through drugs targeting this  
protein:

Abdominal discomfort Abdominal distension Abdominal pain  
Abdominal pain upper Acute coronary syndrome Acute  
febrile neutrophilic dermatosis Acute generalised exanthematous  
pustulosis Acute hepatic failure Adrenal insufficiency Ageusia  
Alanine aminotransferase increased Alopecia Alveolar  
proteinosis Anaemia Angioedema Angiopathy Anxiety Aortic  
dissection Aphagia Aphthous stomatitis Aplastic anaemia  
Apoptosis Arrhythmia Arthralgia Ascites Aspartate  
aminotransferase increased Assisted fertilisation Asthenia Back  
pain Blindness Blindness cortical Blister Blood albumin  
decreased Blood alkaline phosphatase increased Blood amylase  
increased Blood bilirubin increased Blood creatine phosphokinase

increased Blood creatinine increased Blood disorder Blood  
 glucose decreased Blood glucose increased Blood lactate  
 dehydrogenase increased Blood magnesium decreased Blood  
 phosphorus decreased Blood potassium decreased Blood potassium  
 increased Blood sodium increased Blood thyroid stimulating hormone  
 increased Blood urea increased Blood uric acid increased Body  
 temperature increased Bone marrow necrosis Bone pain Bradycardia  
 Brain oedema Breast enlargement Breast feeding  
 Calcinosis Cardiac disorder Cardiac failure Cardiac failure  
 congestive Cardiac hypertrophy Cardiac tamponade Cardiogenic shock  
 Cardiomyopathy Cell death Cerebral haemorrhage Cerebral  
 infarction Cerebrovascular accident Chest pain Chills  
 Colitis Confusional state Congenital skin disorder  
 Conjunctival haemorrhage Conjunctivitis Connective tissue  
 disorder Constipation Convulsion Cough Cytogenetic  
 abnormality Death Decreased appetite Deep vein thrombosis  
 Dehydration Delirium tremens Depressed mood Dermatitis  
 bullous Dermatitis exfoliative Dermatitis psoriasiform  
 Diarrhoea Discomfort Disease progression Diverticulitis  
 Dizziness Drug interaction Dry eye Dry mouth Dry skin  
 Dysgeusia Dyspepsia Dyspnoea exertional Ecchymosis  
 Effusion Ehlers-Danlos syndrome Ejection fraction Ejection  
 fraction decreased Electrocardiogram PR interval Embolism  
 Eosinophilia Epistaxis Erythema Erythema multiforme  
 Eye disorder Eye oedema Face oedema Fatigue Febrile  
 neutropenia Feeling abnormal Feeling cold Fibrosis Fistula  
 Flank pain Flatulence Fluid retention Flushing Gastric  
 haemorrhage Gastric ulcer Gastritis Gastroenteritis  
 Gastrointestinal disorder Gastrointestinal haemorrhage  
 Gastrointestinal neoplasm Gastrointestinal pain  
 Gastrointestinal perforation Gastrointestinal tract irritation  
 Gastrooesophageal reflux disease Generalised oedema  
 Gingival pain Gingivitis Glaucoma Glossitis Glossodynia  
 Gout Gynaecomastia Haematemesis Haematochezia  
 Haematological malignancy Haematoma Haematuria Haemoglobin  
 Haemoglobin decreased Haemoptysis Haemorrhage Haemorrhoids  
 Hair colour changes Headache Hepatic enzyme increased  
 Hepatic failure Hepatic necrosis Hepatitis Herpes simplex  
 Herpes virus infection Herpes zoster Hypercalcaemia  
 Hyperglycaemia Hyperhidrosis Hyperkalaemia  
 Hypernatraemia Hyperplasia Hypersensitivity Hypertension  
 Hyperthyroidism Hypertrophy Hyperuricaemia Hypoalbuminaemia  
 Hypocalcaemia Hypogeusia Hypoglycaemia Hypokalaemia  
 Hyponatraemia Hypophosphataemia Hypotension Hypothyroidism  
 Ileus Immunosuppression Infarction Infection Infestation  
 Inflammation Influenza Influenza like illness Insomnia  
 Interstitial lung disease Intestinal obstruction  
 Intracranial pressure increased Ischaemia Jaundice Joint  
 swelling Lacrimation increased Left ventricular dysfunction  
 Leukoderma Leukoencephalopathy Leukopenia Lipase increased  
 Liver disorder Loss of consciousness Lower respiratory  
 tract infection Lung neoplasm malignant Lymphoma Lymphopenia  
 Macular oedema Malaise Mastocytic leukaemia Mastocytoma  
 Mediastinal disorder Melaena Memory impairment Menorrhagia  
 Mental disorder Metastasis Metastatic neoplasm

Metrorrhagia      Microangiopathy      Migraine      Mouth ulceration  
 Mucosal dryness      Mucosal inflammation      Muscle spasms  
 Musculoskeletal discomfort      Musculoskeletal disorder  
 Musculoskeletal pain      Musculoskeletal stiffness      Myalgia  
 Myelodysplastic syndrome      Myeloproliferative disorder  
 Myocardial ischaemia      Myopathy      Nail disorder  
 Nasopharyngitis      Nausea      Necrosis      Necrosis ischaemic  
 Neoplasm malignant      Nephropathy      Nephropathy toxic      Nephrotic  
 syndrome      Nervous system disorder      Neuropathy peripheral  
 Neutropenia      Night sweats      Obstruction      Oedema      Oedema  
 peripheral      Oesophagitis      Opportunistic infection      Optic  
 neuritis      Oral pain      Oropharyngeal discomfort      Oropharyngeal  
 pain      Osteonecrosis      Ovarian disorder      Pain      Pain in extremity  
 Pancreatic disorder      Pancreatitis      Pancytopenia  
 Papilloedema      Papilloma      Paraesthesia      Parity  
 Pericardial effusion      Pericarditis      Periorbital oedema  
 Peripheral coldness      Petechiae      Pharyngitis      Photosensitivity  
 reaction      Pigmentation disorder      Platelet count decreased  
 Pleural disorder      Pleural effusion      Pneumonia      Pollakiuria  
 Posterior reversible encephalopathy syndrome      Primary  
 hypothyroidism      Protein urine present      Proteinuria      Prurigo  
 Pruritus      Psoriasis      Pulmonary embolism      Pulmonary  
 fibrosis      Pulmonary haemorrhage      Pulmonary oedema      Purpura      Rash  
 erythematous      Rash follicular      Rash papular      Rash vesicular  
 Reflux oesophagitis      Regressive behaviour      Renal failure  
 Renal failure acute      Renal impairment      Renal tubular disorder  
 Respiratory tract infection      Retinal haemorrhage  
 Rhabdomyolysis      Rhinitis      Sciatica      Sepsis      Sexual  
 dysfunction      Sexually active      Shock      Sinusitis      Skin discolouration  
 Skin disorder      Social avoidant behaviour      Somnolence  
 Splinter haemorrhages      Stomatitis      Swelling      Syncope  
 Systemic mastocytosis      Tachycardia      Tenderness      Testicular  
 disorder      Thrombocytopenia      Thrombosis      Thrombotic microangiopathy  
 Thyroid disorder      Thyroiditis      Tinnitus      Tongue ulceration      Toxic  
 epidermal necrolysis      Transient ischaemic attack      Tumour lysis  
 syndrome      Tumour necrosis      Ulcer      Upper respiratory tract infection  
 Vaginal discharge      Varicella      Vascular purpura      Venous thrombosis  
 Ventricular dysfunction      Vertigo      Viral infection  
 Vision blurred      Visual acuity reduced      Visual impairment  
 Vitreous haemorrhage      Vomiting      Weight decreased      Weight  
 increased      Wound haemorrhage      Yellow skin

\*\*\*\*\*  
 \*\*\*\*\*

Asialoglycoprotein receptor 2 - Group: Receptor

Treated with:

antihemophilic factor: approved      biotech      (0 associated side  
 effects)      For the treatment of hemophilia A, von Willebrand disease  
 and Factor XIII deficiency

known side effects mediated through drugs targeting this protein:

\*\*\*\*\*  
 \*\*\*\*\*

Growth hormone receptor - Group: Receptor

Treated with:

somatropin recombinant: approved biotech (0 associated side effects) For treatment of dwarfism, acromegaly and prevention of HIV-induced weight loss  
pegvisomant: approved biotech (0 associated side effects)  
Pegvisomant is a growth hormone receptor antagonist used for the treatment of acromegaly.

known side effects mediated through drugs targeting this protein:

\*\*\*\*\*  
\*\*\*\*\*

Glutamate [NMDA] receptor subunit 3B - Group: Channel

Treated with:

l-glutamic acid: approved, nutraceutical small molecule (0 associated side effects) Considered to be nature's "Brain food" by improving mental capacities; helps speed the healing of ulcers; gives a "lift" from fatigue; helps control alcoholism, schizophrenia and the craving for sugar.

glycine: approved, nutraceutical small molecule (38 associated side effects) Supplemental glycine may have antispastic activity. Very early findings suggest it may also have antipsychotic activity as well as antioxidant and anti-inflammatory activities.

halothane: approved small molecule (10 associated side effects)

For the induction and maintenance of general anesthesia

orphenadrine: approved small molecule (28 associated side effects) Indicated for the treatment of Parkinson's disease.

tenocyclidine: illicit, experimental small molecule (0 associated side effects) Because of its high affinity for the phencyclidine binding site on the NMDA receptor, the 3H radiolabelled form of tenocyclidine is widely used in research into NMDA receptors.

64 known side effects mediated through drugs targeting this protein:

Abdominal discomfort Abdominal distension Acidosis Agitation  
Anaemia Anaphylactic shock Angina pectoris Aplastic  
anaemia Arrhythmia Asthenia Back pain Blindness Blindness  
transient Cardiac arrest Chills Coma Confusional state  
Constipation Convulsion Dehydration Diarrhoea Dizziness  
Dry mouth Electrolyte imbalance Encephalopathy Feeling  
abnormal Fluid overload Hallucination Headache Hepatic  
necrosis Hyperammonaemia Hyperkinesia Hyperpyrexia  
Hypersensitivity Hyponatraemia Hypotension Lung disorder  
Mydriasis Nausea Necrosis Oedema Pain  
Palpitations Polyuria Pruritus Pulmonary congestion  
Respiratory arrest Respiratory tract congestion Rhinitis  
Salivary hypersecretion Skin disorder Somnolence  
Tachycardia Tension Thirst Thrombophlebitis Tremor  
Urinary hesitation Urinary retention Urticaria Vertigo  
Vision blurred Visual impairment Vomiting

\*\*\*\*\*  
\*\*\*\*\*

Anti-Muellerian hormone type-2 receptor - Group: Enzyme

Treated with:

adenosine triphosphate: approved, nutraceutical small molecule  
(0 associated side effects) For nutritional supplementation,  
also for treating dietary shortage or imbalance

known side effects mediated through drugs targeting this protein:

\*\*\*\*\*  
\*\*\*\*\*

Membrane-bound lytic murein transglycosylase B - Group: Enzyme

Treated with:

bulgecin a: experimental small molecule (0 associated side effects)

bicine: experimental small molecule (0 associated side effects)

known side effects mediated through drugs targeting this protein:

\*\*\*\*\*  
\*\*\*\*\*

H(+)/Cl(-) exchange transporter clcA - Group: Channel

Treated with:

n-octane: experimental small molecule (0 associated side effects)

pentadecane: experimental small molecule (0 associated side effects)

known side effects mediated through drugs targeting this protein:

\*\*\*\*\*  
\*\*\*\*\*

ATP-sensitive inward rectifier potassium channel 11 - Group: Channel

Treated with:

glimepiride: approved small molecule (59 associated side effects) For concomitant use with insulin for the treatment of noninsulin-dependent (type 2) diabetes mellitus.

ibutilide: approved small molecule (53 associated side effects)

Indicated for the rapid conversion of atrial fibrillation or atrial flutter of recent onset to sinus rhythm.

verapamil: approved small molecule (113 associated side effects) For the treatment of hypertension, angina, and cluster headache prophylaxis.

levosimendan: approved small molecule (0 associated side effects) For short term treatment of acutely decompensated severe chronic heart failure (CHF). Also being investigated for use/treatment in heart disease.

glyburide: approved small molecule (52 associated side effects)

Indicated as an adjunct to diet to lower the blood glucose in patients with NIDDM whose hyperglycemia cannot be satisfactorily controlled by diet alone.

diazoxide: approved small molecule (124 associated side effects) Used parentally to treat hypertensive emergencies. Also used to treat hypoglycemia secondary to insulinoma.

thiamylal: approved small molecule (0 associated side effects)

Used for the production of complete anaesthesia of short

duration, for the induction of general anaesthesia, and for inducing a hypnotic state.

245 known side effects mediated through drugs targeting this protein:

Abdominal discomfort Abdominal distension Abdominal pain Acute coronary syndrome  
Ageusia Agranulocytosis Albuminuria Alopecia  
Anaemia Anaphylactic shock Angina pectoris Angioedema  
Anxiety Aplastic anaemia Arrhythmia Arthralgia Aspartate aminotransferase increased  
Asthenia Atrioventricular block complete Atrioventricular block first degree  
Atrioventricular block second degree Atrioventricular dissociation Azotaemia  
Back pain Balance disorder Blindness Blood creatine phosphokinase increased  
Blood creatinine decreased Blood creatinine increased Blood immunoglobulin G decreased  
Blood pressure increased Blood prolactin increased Blood urea increased  
Body temperature increased Bradycardia Breast mass Bronchospasm  
Bundle branch block Cardiac arrest Cardiac failure Cardiac failure congestive  
Cardiomyopathy Cataract Cellulitis Cerebral ischaemia Cerebrovascular accident  
Chest discomfort Chest pain Choking sensation Cholestasis Coma Confusional state  
Conjunctival haemorrhage Constipation Convulsion Cough Deafness Decreased appetite  
Depressive symptom Dermatitis atopic Diabetic hyperosmolar coma Diabetic ketoacidosis  
Diarrhoea Diplopia Discomfort Disease progression Dissociation Disturbance  
in sexual arousal Dizziness Drug interaction Dry mouth Dysgeusia Dyspepsia  
Dyspnoea Ecchymosis Electrocardiogram abnormal Electrocardiogram change  
Eosinophilia Erectile dysfunction Erythema Erythema multiforme Erythropenia  
Euphoric mood Extrapyrarnidal disorder Extrasystoles Extravasation  
Fatigue Feeling abnormal Feeling cold Fluid retention Flushing Galactorrhoea  
Gastrointestinal disorder Gastrointestinal pain Gingival hyperplasia Glycosuria  
Gout Gynaecomastia Haematuria Haemoglobin decreased Haemolytic anaemia  
Haemorrhage Headache Hearing impaired Hepatic enzyme increased Hepatic failure  
Hepatic function abnormal Hepatitis Herpes virus infection Hirsutism Hot flush  
Hyperglycaemia Hyperhidrosis Hyperkeratosis Hyperplasia Hyperprolactinaemia  
Hypersensitivity Hypertension Hypertrophic cardiomyopathy Hypertrophy  
Hypoaesthesia Hypoglycaemia Hyponatraemia Hypopituitarism Hypotension  
Ileus paralytic Ill-defined disorder Inappropriate antidiuretic hormone secretion  
Increased appetite Infarction Infection Infection susceptibility increased  
Influenza Injection site phlebitis Insomnia Intermittent claudication  
Ischaemia Jaundice Jaundice cholestatic Joint swelling Ketoacidosis  
Laboratory test abnormal Lacrimation increased Laryngospasm Lethargy  
Leukocytoclastic vasculitis Leukocytosis Leukopenia Libido decreased  
Liver disorder Liver function test abnormal Loss of consciousness Lymphadenopathy  
Macule Malaise Malnutrition Mass Menopausal symptoms Muscle fatigue  
Muscle spasms Muscular weakness Musculoskeletal discomfort Myalgia  
Myocardial infarction Myocardial ischaemia Nausea

Necrosis    Nephropathy    Nephrotic syndrome    Nervous system  
 disorder    Nervousness    Neutropenia    Nocturia    Nodal arrhythmia  
 Nystagmus    Oedema    Oedema peripheral    Oligomenorrhoea    Optic  
 nerve disorder    Optic nerve infarction    Optic neuritis    Orthostatic  
 hypotension    Pain    Pain in extremity    Palpitations    Pancreatic  
 necrosis    Pancreatitis acute    Pancytopenia    Papilloedema  
 Paraesthesia    Paralysis    Parotid gland enlargement  
 Pharyngitis    Phlebitis    Photosensitivity reaction    Platelet  
 disorder    Pollakiuria    Polyneuropathy    Porphyrria    Porphyrria non-  
 acute    Pruritus    Pulmonary oedema    Purpura    Quadriparesis    Rash  
 Rash maculo-papular    Renal failure    Respiratory failure  
 Respiratory tract infection    Rhinitis    Rhythm idioventricular  
 Salivary hypersecretion    Scotoma    Sensory loss    Shock  
 Sinus arrest    Sinus bradycardia    Sinus tachycardia    Sinusitis  
 Sleep disorder    Somnolence    Supraventricular extrasystoles  
 Supraventricular tachycardia    Swelling    Syncope  
 Tachyarrhythmia    Tachycardia    Tension    Thrombocytopenia  
 Tinnitus    Tremor    Upper respiratory tract infection  
 Urinary tract infection    Urticaria    Vascular purpura  
 Vasculitis    Vasodilation procedure    Ventricular arrhythmia  
 Ventricular extrasystoles    Ventricular tachycardia  
 Vertigo    Vision blurred    Visual acuity reduced    Visual  
 impairment    Vomiting

\*\*\*\*\*  
 \*\*\*\*\*

Solute carrier organic anion transporter family member 4C1 - Group:  
 Transporter

Treated with:

liothyronine:    approved    small molecule    (0 associated side  
 effects)    Used as replacement or supplemental therapy in patients  
 with hypothyroidism of any etiology, except transient hypothyroidism  
 during the recovery phase of subacute thyroiditis.

digoxin:    approved    small molecule    (56 associated side effects)  
 For the treatment and management of congestive cardiac  
 insufficiency, arrhythmias and heart failure.

ouabain:    approved    small molecule    (0 associated side effects)  
 For the treatment of atrial fibrillation and flutter and heart  
 failure

digitoxin:    approved    small molecule    (0 associated side effects)  
 For the treatment and management of congestive cardiac  
 insufficiency, arrhythmias and heart failure.

liotrix:    approved    small molecule    (0 associated side effects)  
 May be used to treat primary, secondary or tertiary  
 hypothyroidism. May also be used to suppress thyroid stimulating  
 hormone (TSH) secretion in patients with simple (nontoxic) goiter,  
 subacute or chronic lymphocytic thyroiditis multinodular goiter, and  
 in the management of thyroid cancer. May be used in conjunction with  
 other antithyroid agents to treat thyrotoxicosis to prevent  
 goitrogenesis and hypothyroidism. May also be used for differential  
 diagnosis of suspected mild hyperthyroidism or thyroid gland  
 autonomy.

56 known side effects mediated through drugs targeting this protein:

Abdominal pain    Anxiety    Apathy    Arrhythmia    Asthenia  
 Atrial tachycardia    Atrioventricular block complete

Atrioventricular block first degree      Atrioventricular block  
 second degree      Atrioventricular dissociation      Bradycardia  
 Cardiac arrest      Cardiac disorder      Cardioactive drug level  
 Chorea      Conduction disorder      Confusional state      Death  
 Decreased appetite      Delirium      Dermatitis      Diarrhoea  
 Dissociation      Dizziness      Electrocardiogram PR prolongation  
 Electrocardiogram ST segment      Electrocardiogram ST segment  
 depression      Electrocardiogram change      Extrasystoles      Feeling  
 abnormal      Flat affect      Gastrointestinal necrosis      Gastrointestinal  
 pain      Gynaecomastia      Hallucination      Headache      Intestinal  
 ischaemia      Ischaemia      Mesenteric vascular insufficiency      Nausea  
                  Necrosis      Pain      Palpitations      Poisoning      Psychotic  
 disorder      Rash      Rash maculo-papular      Sinus bradycardia      Tachycardia  
                  Thrombocytopenia      Ventricular extrasystoles      Ventricular  
 fibrillation      Ventricular tachycardia      Visual impairment  
 Vomiting      Xanthopsia

\*\*\*\*\*  
 \*\*\*\*\*

Bile acid receptor - Group: Receptor

Treated with:

fexaramine: experimental      small molecule      (0 associated side effects)

chenodeoxycholic acid: approved      small molecule      (0 associated side effects)      Chenodiol is indicated for patients with radiolucent stones in well-opacifying gallbladders, in whom selective surgery would be undertaken except for the presence of increased surgical risk due to systemic disease or age. Chenodiol will not dissolve calcified (radiopaque) or radiolucent bile pigment stones.

(8alpha,10alpha,13alpha,17beta)-17-[(4-hydroxyphenyl)carbonyl]androsta-3,5-diene-3-carboxylic acid: experimental      small molecule      (0 associated side effects)

known side effects mediated through drugs targeting this protein:

\*\*\*\*\*  
 \*\*\*\*\*

Sodium- and chloride-dependent GABA transporter 1 - Group:

Transporter

Treated with:

tiagabine: approved      small molecule      (278 associated side effects)      For the treatment of partial seizures

278 known side effects mediated through drugs targeting this protein:

Abdominal pain      Abnormal dreams      Abnormal faeces      Abscess      Acne  
                  Acute coronary syndrome      Affect lability      Ageusia  
                  Agitation      Alopecia      Amblyopia      Amenorrhoea      Anaemia  
                  Angina pectoris      Angiopathy      Anxiety      Apathy      Apnoea  
                  Arthralgia      Arthritis      Arthropathy      Asthenia      Asthma  
                  Ataxia      Back pain      Benign neoplasm      Benign neoplasm of  
 skin      Bladder pain      Blepharitis      Blindness      Body temperature  
 increased      Breast enlargement      Breast pain      Breath odour  
                  Bronchitis      Bursitis      Cellulitis      Central nervous system  
 neoplasm      Cerebral ischaemia      Chest pain      Chills



Cholecystitis      Cholelithiasis      Choreoathetosis      Coma  
 Completed suicide      Confusional state      Conjunctivitis  
 Constipation      Coordination abnormal      Cough      Cystitis  
 Cystitis noninfective      Deafness      Death      Decreased appetite  
 Dehydration      Delusion      Dental caries      Depersonalisation  
 Depressed level of consciousness      Dermatitis bullous  
 Dermatitis contact      Dermatitis exfoliative      Diarrhoea  
 Diplopia      Discomfort      Disturbance in attention      Disturbance  
 in sexual arousal      Dizziness      Dry mouth      Dry skin      Dysarthria  
 Dysgeusia      Dyskinesia      Dysmenorrhoea      Dyspepsia      Dysphagia  
 Dysphonia      Dyspnoea      Dystonia      Dysuria      Ear infection  
 Ear pain      Ecchymosis      Eczema      Electrocardiogram abnormal  
 Encephalopathy      Epilepsy      Epistaxis      Erectile dysfunction  
 Eructation      Euphoric mood      Eye pain      Face oedema      Faecal  
 incontinence      Fatigue      Feeling abnormal      Fibrocystic breast  
 disease      Flat affect      Flatulence      Furuncle      Gait disturbance  
 Gastritis      Gastroenteritis      Gastrointestinal haemorrhage  
 Gastrointestinal pain      Gingival hyperplasia      Gingivitis  
 Glossitis      Goitre      Haematuria      Haemoglobin      Haemoptysis  
 Haemorrhage      Hallucination      Headache      Hemiplegia  
 Hepatomegaly      Hernia      Herpes simplex      Herpes virus  
 infection      Herpes zoster      Hiccups      Hirsutism      Hostility  
 Hyperacusis      Hypercholesterolaemia      Hyperglycaemia  
 Hyperhidrosis      Hyperkinesia      Hyperlipidaemia      Hyperplasia  
 Hyperreflexia      Hypersensitivity      Hypertension      Hypertonia  
 Hypertrophy      Hyperventilation      Hypoaesthesia      Hypoglycaemia  
 Hypokalaemia      Hypokinesia      Hyponatraemia      Hyporeflexia  
 Hypotension      Hypothyroidism      Hypotonia      Ill-defined disorder  
 Incontinence      Increased appetite      Infarction      Infection  
 Influenza      Insomnia      Irritability      Ischaemia      Keratitis  
 Laryngitis      Leukopenia      Libido decreased      Libido increased      Liver  
 function test abnormal      Loss of consciousness      Lymphadenopathy  
 Malaise      Melaena      Menorrhagia      Mental disability  
 Metrorrhagia      Micturition urgency      Migraine      Mood swings  
 Mouth ulceration      Movement disorder      Muscle contracture  
 Muscle relaxant therapy      Muscle rigidity      Muscle spasms  
 Muscle twitching      Muscular weakness      Musculoskeletal discomfort  
 Musculoskeletal stiffness      Myalgia      Myocardial infarction  
 Myoclonus      Nausea      Neck pain      Neoplasm      Neoplasm  
 malignant      Nervousness      Neuritis      Neuropathy peripheral      Neurosis  
 Nocturia      Nodule      Nuchal rigidity      Nystagmus      Oedema  
 Oedema peripheral      Oesophagitis      Orthostatic hypotension  
 Osteoarthritis      Otitis externa      Otitis media      Pain  
 Pallor      Palpitations      Paraesthesia oral      Paralysis  
 Paranoia      Parosmia      Pelvic pain      Peripheral vascular disorder  
 Personality disorder      Petechiae      Pharyngitis      Phlebitis  
 Photophobia      Photosensitivity reaction      Pneumonia      Pollakiuria  
 Polyuria      Pruritus      Psoriasis      Psychotic disorder  
 Pyelonephritis      Rash maculo-papular      Rash pustular  
 Rectal haemorrhage      Red blood cell abnormality      Renal  
 failure      Respiratory disorder      Rhinitis      Salivary  
 hypersecretion      Salpingitis      Scotoma      Sepsis      Shock      Sinusitis  
 Skin cancer      Skin ulcer      Smear cervix abnormal      Somnolence  
 Speech disorder      Stomatitis      Stupor      Subcutaneous nodule  
 Sudden death      Suicide attempt      Syncope      Tachycardia

Tendinous contracture Tension Thinking abnormalThirst  
Thrombocytopenia Thrombophlebitis Tinnitus Tooth abscess  
Tremor Ulcer Urethritis Urinary incontinence Urinary  
retention Urinary tract infection Urine output increased  
Urticaria Vaginal haemorrhage Vaginal infectionVaginal  
inflammation Vasodilation procedure Vertigo Visual acuity  
reduced Visual impairmentVomiting Weight decreased Weight  
increased

\*\*\*\*\*  
\*\*\*\*\*

Extracellular calcium-sensing receptor - Group: Receptor

Treated with:

cinacalcet: approved small molecule (37 associated side effects)

For the treatment of secondary hyperparathyroidism in patients with Chronic Kidney Disease who are on hemodialysis or peritoneal dialysis. Also for the treatment of hypercalcemia in patients with parathyroid carcinoma.

37 known side effects mediated through drugs targeting this protein:

Abdominal pain Arthralgia Asthenia Body temperature increased  
Cardiac failure Chest pain Convulsion Cough Decreased  
appetite Dermatitis Diarrhoea Dizziness Dyspepsia Dyspnoea  
Fatigue Gastrointestinal pain Headache Hypersensitivity  
Hypertension Hypocalcaemia Hypotension Infection  
Muscle spasms Musculoskeletal discomfort Myalgia  
Nausea Oedema Oedema peripheralPain Pain in extremity  
Paraesthesia Pruritus Rash Tetany Thrombosis Upper  
respiratory tract infection Vomiting

\*\*\*\*\*  
\*\*\*\*\*

Epithelial discoidin domain-containing receptor 1 - Group: Enzyme

Treated with:

imatinib: approved small molecule (248 associated side effects) For the treatment Philadelphia chromosome positive chronic myeloid leukemia (CML) and malignant gastrointestinal stromal tumors (GIST).

248 known side effects mediated through drugs targeting this protein:

Abdominal discomfort Abdominal distension Abdominal pain Acute febrile neutrophilic dermatosis Acute generalised exanthematous pustulosis Acute hepatic failure Alanine aminotransferase increased Alopecia Alveolar proteinosis Anaemia Angioedema Angiopathy Anxiety Aphagia Aplastic anaemia Apoptosis Arthralgia Ascites Aspartate aminotransferase increased Assisted fertilisation Asthenia Back pain Blister Blood alkaline phosphatase increased Blood bilirubin increased Blood creatine phosphokinase increased Blood creatinine increased Blood disorder Blood lactate dehydrogenase increased Blood urea increased Body temperature increased Bone marrow necrosis Bone pain Brain oedema Breast enlargement Breast feeding Calcinosis Cardiac disorder Cardiac failure Cardiac failure congestive Cardiac hypertrophy Cardiac tamponadeCardiogenic shock Cardiomyopathy Cell death Cerebral haemorrhage Chest pain Chills Colitis Confusional stateConjunctival

haemorrhage Conjunctivitis Constipation Convulsion Cough  
 Cytogenetic abnormality Death Decreased appetite  
 Dehydration Delirium tremens Dermatitis bullous Dermatitis  
 exfoliative Diarrhoea Disease progression Diverticulitis  
 Dizziness Drug interaction Dry eye Dry skin Dysgeusia  
 Dyspepsia Dyspnoea exertional Ecchymosis Effusion  
 Ehlers-Danlos syndrome Embolism Eosinophilia Epistaxis  
 Erythema Erythema multiforme Eye oedema Face oedema  
 Fatigue Febrile neutropenia Feeling abnormal Feeling  
 cold Fibrosis Flatulence Fluid retention Flushing Gastric  
 ulcer Gastritis Gastroenteritis Gastrointestinal haemorrhage  
 Gastrointestinal neoplasm Gastrointestinal pain  
 Gastrointestinal perforation Gastrointestinal tract irritation  
 Gastrooesophageal reflux disease Generalised oedema  
 Glaucoma Gout Gynaecomastia Haematochezia  
 Haematological malignancy Haematuria Haemoglobin Haemorrhage  
 Headache Hepatic enzyme increased Hepatic failure  
 Hepatic necrosis Hepatitis Herpes simplex Herpes virus  
 infection Herpes zoster Hyperhidrosis Hyperkalaemia  
 Hyperplasia Hypersensitivity Hypertension Hypertrophy  
 Hypokalaemia Hyponatraemia Hypophosphataemia Hypotension  
 Ileus Immunosuppression Infection Inflammation Influenza  
 Insomnia Interstitial lung disease Intestinal obstruction  
 Intracranial pressure increased Jaundice Joint swelling  
 Lacrimation increased Left ventricular dysfunction Leukopenia  
 Liver disorder Loss of consciousness Lower respiratory  
 tract infection Lymphoma Lymphopenia Macular oedema Mastocytic  
 leukaemia Mastocytoma Memory impairment Menorrhagia Metastatic  
 neoplasm Migraine Mouth ulceration Muscle spasms  
 Musculoskeletal discomfort Musculoskeletal disorder  
 Musculoskeletal pain Musculoskeletal stiffness Myalgia  
 Myelodysplastic syndrome Myeloproliferative disorder Nail  
 disorder Nasopharyngitis Nausea Necrosis Necrosis  
 ischaemic Neoplasm malignant Nephropathy Nephropathy toxic  
 Nephrotic syndrome Neuropathy peripheral Neutropenia Night  
 sweats Obstruction Oedema Oedema peripheral Opportunistic  
 infection Optic neuritis Oropharyngeal discomfort  
 Oropharyngeal pain Osteonecrosis Ovarian disorder Pain  
 Pancreatic disorder Pancreatitis Pancytopenia  
 Papilloedema Papilloma Paraesthesia Parity  
 Pericardial effusion Pericarditis Periorbital oedema  
 Peripheral coldness Petechiae Pharyngitis Photosensitivity  
 reaction Pigmentation disorder Pleural disorder Pleural effusion  
 Pneumonia Pollakiuria Pruritus Psoriasis Pulmonary  
 fibrosis Pulmonary oedema Purpura Rash vesicular Renal  
 failure Renal impairment Renal tubular disorder Respiratory tract  
 infection Retinal haemorrhage Rhinitis Sciatica Sepsis  
 Sexual dysfunction Sexually active Shock Sinusitis Skin  
 disorder Somnolence Stomatitis Swelling Syncope Systemic  
 mastocytosis Tachycardia Tenderness Testicular disorder  
 Thrombocytopenia Thrombosis Tinnitus Toxic epidermal  
 necrolysis Tumour lysis syndrome Tumour necrosis Ulcer Upper  
 respiratory tract infection Vaginal discharge Varicella Vascular  
 purpura Ventricular dysfunction Vertigo Viral infection

Vision blurred Vitreous haemorrhage Vomiting Weight  
decreased Weight increased  
\*\*\*\*\*  
\*\*\*\*\*

Hypothetical membrane spanning protein - Group: Other

Treated with:

ubiquinone-1: experimental small molecule (0 associated  
side effects)

known side effects mediated through drugs targeting this protein:

\*\*\*\*\*  
\*\*\*\*\*

Vasopressin V1b receptor - Group: Receptor

Treated with:

desmopressin: approved small molecule (0 associated side  
effects) Oral formulations may be used to manage primary nocturnal  
enuresis in adults and vasopressin sensitive diabetes insipidus, and  
for control of temporary polyuria and polydipsia following head  
trauma or surgery in the pituitary region. Intranasal and parenteral  
formulations may be used to manage spontaneous or trauma-induced  
bleeds (e.g. hemarthrosis, intramuscular hematoma, mucosal bleeding)  
in patients with hemophilia A or von Willebrand's disease Type I.  
May also be used parenterally to prevent or treat bleeding in  
patients with uremia.

terlipressin: approved small molecule (0 associated side  
effects) Commonly used to stop bleeding of varices in the food  
pipe (oesophagus).

known side effects mediated through drugs targeting this protein:

\*\*\*\*\*  
\*\*\*\*\*

Neutral amino acid transporter A - Group: Transporter

Treated with:

l-alanine: approved, nutraceutical small molecule (0 associated  
side effects) Used for protein synthesis.

known side effects mediated through drugs targeting this protein:

\*\*\*\*\*  
\*\*\*\*\*

Proteinase-activated receptor 1 - Group: Receptor

Treated with:

streptokinase: approved biotech (0 associated side effects)  
For the treatment of acute evolving transmural myocardial  
infarction, pulmonary embolism, deep vein thrombosis, arterial  
thrombosis or embolism and occlusion of arteriovenous cannulae

known side effects mediated through drugs targeting this protein:

\*\*\*\*\*  
\*\*\*\*\*

Adenosine A1 receptor - Group: Receptor

Treated with:

caffeine: approved small molecule (32 associated side effects)

For management of fatigue, orthostatic hypotension, and for the short term treatment of apnea of prematurity in infants.

theophylline: approved small molecule (60 associated side effects) For the treatment of the symptoms and reversible airflow obstruction associated with chronic asthma and other chronic lung diseases, such as emphysema and chronic bronchitis.

adenosine: approved small molecule (32 associated side effects)

Used as an initial treatment for the termination of paroxysmal supraventricular tachycardia (PVST), including that associated with accessory bypass tracts, and is a drug of choice for terminating stable, narrow-complex supraventricular tachycardias (SVT). Also used as an adjunct to thallous chloride TI 201 myocardial perfusion scintigraphy (thallium stress test) in patients who are unable to exercise adequately, as well as an adjunct to vagal maneuvers and clinical assessment to establish a specific diagnosis of undefined, stable, narrow-complex SVT.

dyphylline: approved small molecule (27 associated side effects)

For relief of acute bronchial asthma and for reversible bronchospasm associated with chronic bronchitis and emphysema.

pentoxifylline: approved small molecule (93 associated side effects) For the treatment of patients with intermittent lameness or immobility arising from chronic occlusive arterial disease of the limbs.

gabapentin: approved small molecule (456 associated side effects) For the management of postherpetic neuralgia in adults and as adjunctive therapy in the treatment of partial seizures with and without secondary generalization in patients over 12 years of age with epilepsy.

aminophylline: approved small molecule (41 associated side effects) For the treatment of bronchospasm due to asthma, emphysema and chronic bronchitis.

oxtriphylline: approved small molecule (0 associated side effects) Used to treat the symptoms of asthma, bronchitis, and emphysema.

theobromine: approved small molecule (0 associated side effects) theobromine is used as a vasodilator, a diuretic, and heart stimulant. And similar to caffeine, it may be useful in management of fatigue and orthostatic hypotension.

defibrotide: approved biotech (0 associated side effects)

Defibrotide is used to treat or prevent a failure of normal blood flow (occlusive venous disease, OVD) in the liver of patients who have had bone marrow transplants or received certain drugs such as oral estrogens, mercaptopurine, and many others.

529 known side effects mediated through drugs targeting this protein:

Abdominal discomfort Abdominal distension Abdominal pain  
Abdominal pain upper Abnormal dreams Abnormal faeces  
Abscess Acidosis Acne Acute coronary syndrome  
Affect lability Ageusia Agitation Albuminuria Alcohol  
intolerance Alopecia Amblyopia Amenorrhoea Amnesia Anaemia  
Anaphylactic shock Anaphylactoid reaction Angina pectoris  
Angioedema Angiopathy Anorectal disorder Antidiuretic  
hormone abnormality Antisocial behaviour Antisocial personality

disorder Anuria Anxiety Aortic dissection Apathy  
 Aphasia Aplastic anaemia Apnoea Apraxia Areflexia  
 Arrhythmia Arthralgia Arthritis Arthropathy Asocial behaviour  
 Aspiration Asthenia Asthma Ataxia Atrial  
 fibrillation Atrial tachycardia Atrioventricular block Aura  
 Back pain Bladder pain Bleeding time prolonged  
 Blindness Blister Blood alkaline phosphatase increased  
 Blood antidiuretic hormone abnormal Blood creatinine  
 increased Blood lactate dehydrogenase increased Blood pressure  
 increased Blood sodium increased Blood urea abnormal Blood uric  
 acid increased Body temperature increased Bone pain Bradycardia  
 Breast cancer Breast enlargement Breast pain Bronchitis  
 Bronchospasm Burning sensation Bursitis Candidiasis  
 Capillary fragility increased Cardiac arrest Cardiac  
 disorder Cardiac failure Cardiac failure congestive Cardiac  
 fibrillation Cardiac flutter Cardiovascular disorder  
 Cataract Cellulitis Central nervous system neoplasm  
 Cerebellar syndrome Cerebral haemorrhage Cerebrovascular  
 accident Cheilitis Chest discomfort Chest pain Chills  
 Cholecystitis Cholelithiasis Cholestasis Choreoathetosis  
 Chorioretinitis Chronic obstructive pulmonary disease  
 Clonic convulsion Coagulopathy Colitis Completed suicide  
 Confusional state Conjunctival hyperaemia Conjunctivitis  
 Connective tissue disorder Constipation Conversion  
 disorder Convulsion Coordination abnormal Corneal disorder  
 Costochondritis Cough Cushingoid Cystitis Cystitis  
 noninfective Dandruff Deafness Death Decreased appetite  
 Deep vein thrombosis Dehydration Dependence Depersonalisation  
 Depressed level of consciousness Dermatitis Dermatitis  
 bullous Dermatitis contact Dermatitis exfoliative Diabetes  
 mellitus Diabetic ketoacidosis Diabetic retinopathy  
 Diaphragmatic hernia Diarrhoea Diplopia Discomfort  
 Disorientation Disseminated intravascular coagulation  
 Disturbance in sexual arousal Dizziness Drug abuse Dry  
 eye Dry mouth Dry skin Dry throat Duodenal ulcer  
 Dysaesthesia Dysarthria Dysgeusia Dyskinesia  
 Dysmenorrhoea Dyspepsia Dysphagia Dysphonia Dyspnoea  
 Dystonia Dysuria Ear infection Ear pain Ecchymosis  
 Eczema Effusion Ejaculation disorder Embolism  
 Encephalopathy Enterocolitis Epididymitis Epistaxis  
 Erectile dysfunction Eructation Erythema multiforme  
 Euphoric mood Eustachian tube disorder Extensor plantar  
 response Extrasystoles Extravasation Eye disorder Eye  
 haemorrhage Eye pain Eye pruritus Eyelid ptosis Face oedema  
 Faecal incontinence Fatigue Feeling abnormal Feeling  
 jittery Flat affect Flatulence Fluid overload Fluid retention  
 Flushing Fungal skin infection Furuncle Gait disturbance  
 Gamma-glutamyltransferase increased Gastritis  
 Gastroenteritis Gastrointestinal disorder Gastrointestinal  
 haemorrhage Gastrointestinal pain Gastrooesophageal reflux disease  
 Generalised oedema Genital discharge Gingival bleeding  
 Gingivitis Glaucoma Glossitis Glycosuria Goitre Gout  
 Grand mal convulsion Gynaecomastia Haematemesis  
 Haematochezia Haematoma Haematuria Haemodynamic  
 instability Haemoglobin Haemoptysis Haemorrhage Haemorrhage

intracranial Haemorrhoids Hair disorder Hallucination  
Hangover Headache Hearing impaired Hemiplegia Hepatic  
enzyme increased Hepatic failure Hepatic function abnormal  
Hepatitis Hepatitis cholestatic Hepatitis fulminant  
Hepatobiliary disease Hepatomegaly Hernia Herpes  
simplex Herpes virus infection Herpes zoster Hiccups  
Hirsutism Hordeolum Hostility Hyperaemia Hyperaesthesia  
Hypercalcaemia Hypercholesterolaemia Hyperglycaemia  
Hyperhidrosis Hyperkinesia Hyperlipidaemia  
Hyperreflexia Hypersensitivity Hypertension Hypertonia  
Hypertrophy Hyperuricaemia Hyperventilation Hypoaesthesia  
Hypoglycaemia Hypokalaemia Hypokinesia Hyponatraemia  
Hyporeflexia Hypotension Hypothyroidism Hypotonia  
Hypoventilation Hypoxia Ill-defined disorder Immune  
system disorder Impaired healing Inappropriate antidiuretic hormone  
secretion Incontinence Increased appetite Infarction  
Infection Infectious mononucleosis Infestation Influenza  
Inner ear disorder Insomnia Intentional self-injury  
Interstitial lung disease Intestinal functional disorder  
Intestinal obstruction Intestinal ulcer Iritis  
Irritability Irritable bowel syndrome Jaundice Joint  
stiffness Joint swelling Ketoacidosis Labyrinthitis  
Lacrimation increased Laryngitis Lethargy Leukaemia  
Leukopenia Libido decreased Libido increased Lip haemorrhage  
Liver function test abnormal Loss of consciousness Loss of  
libido Lung disorder Lymphadenopathy Lymphocytosis  
Lymphoma Malaise Mania Mass Mediastinal disorder  
Melaena Melanosis Memory impairment Meningism Meningitis  
Meningitis aseptic Menorrhagia Menstrual disorder  
Mental disability Mental disorder Micturition urgency  
Migraine Miosis Mood swings Mouth ulceration Movement  
disorder Mucosal inflammation Mucous membrane disorder  
Muscle contracture Muscle relaxant therapy Muscle  
spasms Muscle twitching Muscular weakness Musculoskeletal  
discomfort Musculoskeletal stiffness Myalgia Myocardial  
infarction Myoclonus Nail disorder Nasal congestion Nasal  
obstruction Nasopharyngitis Nausea Neck mass Neck pain  
Necrosis Necrotising colitis Necrotising enterocolitis  
neonatal Neoplasm Neoplasm malignant Nephrolithiasis  
Nephrotic syndrome Nervous system disorder Nervousness  
Neuropathy peripheral Neurosis Nocturia Nodule  
Nystagmus Obstruction Occipital neuralgia Oedema  
Oedema peripheral Oesophageal disorder Oesophageal spasm  
Oesophagitis Oral candidiasis Oropharyngeal discomfort  
Oropharyngeal pain Osteoarthritis Osteoporosis  
Otitis externa Otitis media Ovarian failure Pain Pain  
in extremity Palpitations Pancreatitis Pancytopenia  
Papule Paraesthesia Paraesthesia oral Paralysis  
Paranoia Paresis Pelvic pain Penile swelling Penis  
disorder Peptic ulcer Pericardial effusion Pericardial rub  
Pericarditis Peripheral vascular disorder Personality  
disorder Pharyngitis Phlebitis Photophobia Photosensitivity  
reaction Pneumonia aspiration Poisoning Pollakiuria Polyuria  
Proctitis Prothrombin level decreased Pruritus Pruritus  
genital Pseudolymphoma Psoriasis Psychotic disorder

Pulmonary embolism      Pulmonary oedema      Pulmonary thrombosis  
 Purpura      Pyelonephritis      Pyuria      Rash      Rash maculo-  
 papular      Rash pustular      Rectal haemorrhage      Renal failure  
 Renal failure acute      Renal impairment      Renal pain      Respiratory  
 failure      Respiratory tract infection      Retinal degeneration  
 Retinal disorder      Retinal vein thrombosis      Retinopathy of  
 prematurity      Rhabdomyolysis      Rhinitis      Rhinitis seasonal      Salivary  
 gland enlargement      Salivary hypersecretion      Scotoma      Scrotal  
 disorder      Scrotal swelling      Seasonal allergy      Seborrhoeic dermatitis  
 Sensory loss      Sepsis      Shock      Sinus tachycardia      Sinusitis  
 Skin cancer      Skin discolouration      Skin disorder      Skin  
 exfoliation      Skin hypertrophy      Skin necrosis      Skin odour abnormal  
 Skin ulcer      Sleep disorder      Snoring      Somnambulism  
 Somnolence      Speech disorder      Stomatitis      Strabismus      Stupor  
 Subcutaneous nodule      Subdural haematoma      Suicidal  
 behaviour      Suicide attempt      Supraventricular extrasystoles  
 Supraventricular tachycardia      Swelling      Syncope      Tachycardia  
 Tachypnoea      Tenderness      Tendon disorder      Tendonitis      Tension  
 Testicular pain      Thinking abnormal      Thirst      Throat tightness  
 Thrombocytopenia      Thrombophlebitis      Thrombosis      Tinnitus  
 Tongue disorder      Tooth abscess      Tooth discolouration      Tooth  
 disorder      Torsade de pointes      Tremor      Ulcer      Upper respiratory  
 tract infection      Urethral disorder      Urinary incontinence      Urinary  
 retention      Urinary tract disorder      Urinary tract infection      Urine  
 abnormality      Urine analysis abnormal      Urine output increased  
 Urticaria      Uterovaginal prolapse      VIIIth nerve paralysis  
 Vaginal haemorrhage      Varicose vein      Vascular purpura  
 Vasodilation procedure      Venous thrombosis      Ventricular  
 extrasystoles      Ventricular fibrillation      Ventricular  
 tachycardia      Vertigo      Vestibular disorder      Viral diarrhoea      Viral  
 infection      Vision blurred      Visual acuity reduced      Visual impairment  
 Vomiting      Vulvovaginal candidiasis      Vulvovaginal mycotic  
 infection      Vulvovaginal pain      Weight decreased      Weight increased      White  
 blood cell count decreased

\*\*\*\*\*  
 \*\*\*\*\*

Retinoic acid receptor alpha - Group: Receptor

Treated with:

adapalene: approved      small molecule      (35 associated side effects)  
 For the topical treatment of comedo, papular and pustular acne  
 (acne vulgaris) of the face, chest or back.  
 acitretin: approved      small molecule      (165 associated side  
 effects)      For the treatment of severe psoriasis in adults.  
 alitretinoin: approved      small molecule      (0 associated side  
 effects)      For topical treatment of cutaneous lesions in patients  
 with AIDS-related Kaposi's sarcoma.  
 tazarotene: approved      small molecule      (23 associated side effects)  
 Used to treat psoriasis, acne and sun damaged skin  
 (photodamage).  
 etretinate: withdrawn      small molecule      (0 associated side effects)  
 For the treatment of severe psoriasis in adults.  
 isotretinoin: approved      small molecule      (0 associated side  
 effects)      For the treatment of severe recalcitrant nodular acne  
 tamibarotene: approved      small molecule      (0 associated side  
 effects)      Investigated for use/treatment in leukemia (unspecified).



195 known side effects mediated through drugs targeting this protein:

Abdominal pain Acne Ageusia Alcohol intolerance Alopecia  
Angioedema Anorectal discomfort Anorectal disorder  
Arthralgia Arthritis Arthropathy Asthenia Atopy Atrophy  
Back pain Balanoposthitis Benign intracranial hypertension  
Bleeding time prolonged Blepharitis Blister Blood  
creatinine increased Blood triglycerides increased Blood uric  
acid increased Body temperature increased Bone pain Burning  
sensation Bursitis Calcinosis Candidiasis Cataract subcapsular  
Cerumen impaction Chapped lips Cheilitis Chest pain  
Chills Cold sweat Congenital eye disorder  
Conjunctivitis Constipation Convulsion Corneal  
neovascularisation Cough Crocodile tears syndrome Deafness  
Decreased appetite Dermatitis atopic Dermatitis bullous  
Dermatitis contact Diarrhoea Discomfort Dry eye Dry  
mouth Dry skin Dysgeusia Dyspepsia Dysphonia Dysuria Ear  
infection Ear pain Eczema Epistaxis Erectile dysfunction  
Erythema Exostosis Eye disorder Eye irritation Eye  
pain Eyelid oedema Face oedema Facial pain Fatigue Febrile  
neutropenia Feeling abnormal Flushing Foetal disorder Gait  
disturbance Gastrointestinal pain Genital discharge Gingival bleeding  
Gingivitis Glossitis Granuloma Haemoglobin Haemorrhage Hair  
texture abnormal Headache Hepatitis Herpes simplex Herpes  
virus infection High density lipoprotein decreased Hordeolum Hot  
flush Hyperaesthesia Hypercholesterolaemia Hyperhidrosis  
Hyperlipidaemia Hypersensitivity Hypertonia  
Hypertriglyceridaemia Hypertrophy Hypervitaminosis  
Hypervitaminosis A Hypoaesthesia Ill-defined disorder  
Impaired healing Increased appetite Infection  
Inflammation Insomnia Interstitial lung disease  
Iritis Jaundice Keratitis Lacrimation decreased  
Lacrimation increased Laryngitis Lip dry Lip swelling  
Liver function test abnormal Localised oedema Madarosis  
Malaise Mass Melaena Menopausal symptoms Mouth  
ulceration Muscle spasms Muscular weakness Musculoskeletal  
discomfort Myalgia Nasal dryness Nausea Nervousness  
Neutropenia Nodule Oedema Oedema peripheral Optic  
neuritis Osteoarthritis Otitis externa Pain Pancreatitis  
Pancytopenia Papilloedema Pharyngitis Photophobia  
Photosensitivity reaction Proctalgia Pruritus Purpura  
Pyogenic granuloma Rash Rash vesicular Rectal tenesmus  
Retinal haemorrhage Rhinitis Saliva altered Salivary  
hypersecretion Scab Scotoma Seborrhoeic dermatitis  
Sensitisation Sinusitis Skin atrophy Skin  
discolouration Skin disorder Skin exfoliation Skin fissures  
Skin hyperpigmentation Skin hypertrophy Skin irritation Skin  
mass Skin oedema Skin ulcer Somnolence Sticky skin Stomatitis  
Swelling Tension Thirst Tinnitus Tongue ulceration  
Ulcer Urinary tract infection Urine abnormality Urine  
analysis abnormal Urticaria Vascular purpura Vasculitis Vision  
blurred Visual acuity reduced Vulvovaginitis Weight decreased  
White blood cell count decreased Xerophthalmia

\*\*\*\*\*  
\*\*\*\*\*

Low affinity immunoglobulin gamma Fc region receptor II-b - Group:  
Receptor

Treated with:

cetuximab: approved biotech (0 associated side effects) For treatment of EGFR-expressing metastatic colorectal cancer in patients who are refractory to other irinotecan-based chemotherapy regimens. Cetuximab is also indicated for treatment of squamous cell carcinoma of the head and neck in conjunction with radiation therapy.

etanercept: approved biotech (0 associated side effects) For treatment of severe active rheumatoid arthritis in adults, severe juvenile idiopathic arthritis, ankylosing spondylitis, and severe plaque psoriasis.

intravenous immunoglobulin: approved biotech (0 associated side effects) IVIg is used in the treatment of immunodeficiencies, as well as autoimmune and inflammatory disorders. These indications includes idiopathic thrombocytopenic purpura, Kawasaki disease, hypogammaglobulinemia, B cell chronic lymphocytic leukemia, bone marrow transplant complications, Guillain-Barré syndrome, chronic inflammatory demyelinating polyneuropathy (CIDP), multiple sclerosis, rheumatoid arthritis, myasthenia gravis, Wiskott-Aldrich syndrome and inflammatory skin diseases.

adalimumab: approved biotech (0 associated side effects) For treatment of rheumatoid arthritis, psoriatic arthritis, ankylosing spondylitis, and Crohn's disease.

abciximab: approved biotech (0 associated side effects)  
gemtuzumab ozogamicin: approved biotech (0 associated side effects) For treatment of CD33-positive acute myeloid leukemia in patients 60 and over who are not candidates for other chemotherapy.

trastuzumab: approved biotech (0 associated side effects)  
For treatment of early stage HER2-positive breast cancer, or metastatic breast cancer that substantially overexpress HER2.

rituximab: approved biotech (0 associated side effects) For treatment of CD20-positive non-Hodgkins lymphoma, chronic lymphocytic leukemia, and rheumatoid arthritis.

basiliximab: approved biotech (0 associated side effects)  
For prophylactic treatment of kidney transplant rejection

muromonab: approved biotech (0 associated side effects) For treatment of organ transplant recipients, prevention of organ rejection

ibrutumomab: approved biotech (0 associated side effects)  
For treatment of non-Hodgkin's lymphoma

tositumomab: approved biotech (0 associated side effects)  
For treatment of non-Hodgkin's lymphoma (CD20 positive, follicular)

alemtuzumab: approved biotech (0 associated side effects)  
Alemtuzumab (Campath) is a monoclonal antibody therapy used for treatment of B-cell chronic lymphocytic leukemia.

alefacept: approved biotech (0 associated side effects) As an immunosuppressive drug, Alefacept can be used for treatment of moderate to severe chronic plaque psoriasis

efalizumab: approved biotech (0 associated side effects) For the treatment of adult patients with moderate to severe chronic plaque psoriasis, who are candidates for phototherapy or systemic therapy.

antithymocyte globulin: approved biotech (0 associated side effects) For prevention of renal transplant rejection

natalizumab: approved biotech (0 associated side effects) For treatment of multiple sclerosis.

palivizumab: approved biotech (0 associated side effects) For prophylaxis of respiratory diseases caused by respiratory syncytial virus.

daclizumab: approved biotech (0 associated side effects) Zenapax is a humanized monoclonal antibody used for prevention of renal transplant rejection

bevacizumab: approved biotech (0 associated side effects) As part of combination therapy for metastatic colorectal cancer and HER2-negative metastatic breast cancer.

known side effects mediated through drugs targeting this protein:

\*\*\*\*\*  
\*\*\*\*\*

Glutamate receptor 2 - Group: Channel

Treated with:

l-glutamic acid: approved, nutraceutical small molecule (0 associated side effects) Considered to be nature's "Brain food" by improving mental capacities; helps speed the healing of ulcers; gives a "lift" from fatigue; helps control alcoholism, schizophrenia and the craving for sugar.

butabarbital: illicit, approved small molecule (0 associated side effects) For short-term treatment of insomnia and anxiety disorders

butalbital: illicit, approved small molecule (0 associated side effects) Used in combination with acetaminophen or aspirin and caffeine for its sedative and relaxant effects in the treatment of tension headaches, migraines, and pain.

talbutal: illicit, approved small molecule (0 associated side effects) For use as a sedative and hypnotic.

pentobarbital: approved small molecule (38 associated side effects) For the short-term treatment of insomnia.

secobarbital: approved small molecule (38 associated side effects) For the Short-term treatment of intractable insomnia for patients habituated to barbiturates

metharbital: approved small molecule (0 associated side effects) Metharbital is used for the treatment of epilepsy.

thiopental: approved small molecule (0 associated side effects) For use as the sole anesthetic agent for brief (15 minute)

procedures, for induction of anesthesia prior to administration of other anesthetic agents, to supplement regional anesthesia, to provide hypnosis during balanced anesthesia with other agents for analgesia or muscle relaxation, for the control of convulsive states during or following inhalation anesthesia or local anesthesia, in neurosurgical patients with increased intracranial pressure, and for narcoanalysis and narcosynthesis in psychiatric disorders.

primidone: approved small molecule (16 associated side effects)  
 For the treatment of epilepsy  
 methylphenobarbital: approved small molecule (37 associated  
 side effects) For the relief of anxiety, tension, and  
 apprehension, also used as an anticonvulsant for the treatment of  
 epilepsy.  
 quinidine barbiturate: approved small molecule (0 associated  
 side effects)  
 amobarbital: illicit,approved small molecule (0 associated  
 side effects)  
 aprobarbital: illicit,approved small molecule (0 associated  
 side effects)  
 butethal: illicit,approved small molecule (0 associated side  
 effects) For the treatment of insomnia.  
 heptabarbital: approved small molecule (0 associated side  
 effects) Used mainly for sedation and hypnosis.  
 hexobarbital: approved small molecule (0 associated side  
 effects) For the induction of anesthesia prior to the use of other  
 general anesthetic agents and for induction of anesthesia for short  
 surgical, diagnostic, or therapeutic procedures associated with  
 minimal painful stimuli.  
 barbituric acid derivative: illicit,experimental small molecule  
 (0 associated side effects)  
 (s)-des-me-ampa: experimental small molecule (0 associated  
 side effects)  
 2-amino-3-(5-tert-butyl-3-(phosphonomethoxy)-4-isoxazolyl)propionic  
 acid: experimental small molecule (0 associated side effects)  
 iodo-willardiine:experimental small molecule (0 associated  
 side effects)  
 fluoro-willardiine: experimental small molecule (0  
 associated side effects)  
 quisqualate: experimental small molecule (0 associated  
 side effects)  
 (s)-2-amino-3-(1,3,5,7-pentahydro-2,4-dioxo-cyclopenta[e]pyrimidin-  
 1-yl) proionic acid: experimental small molecule (0  
 associated side effects)  
 (s)-atpa: experimental small molecule (0 associated side  
 effects)  
 dnqx: experimental small molecule (0 associated side effects)  
 bromo-willardiine: experimental small molecule (0  
 associated side effects)  
 2-amino-3-(3-hydroxy-7,8-dihydro-6h-cyclohepta[d]-4-  
 isoxazolyl)propionic acid: experimental small molecule (0  
 associated side effects)  
 aniracetam: experimental small molecule (0 associated side  
 effects)  
 thio-atpa: experimental small molecule (0 associated side  
 effects)  
 n,n'-[biphenyl-4,4'-diyl]di(2r)propane-2,1-diyl]dimethanesulfonamide:  
 experimental small molecule (0 associated side effects)  
 2,3,6a,7,8,9-hexahydro-11h-[1,4]dioxino[2,3-g]pyrrolo[2,1-  
 b][1,3]benzoxazin-11-one: experimental small molecule (0  
 associated side effects)

(3s)-3-cyclopentyl-6-methyl-7-[(4-methylpiperazin-1-yl)sulfonyl]-3,4-dihydro-2h-1,2,4-benzothiadiazine 1,1-dioxide: experimental small molecule (0 associated side effects)  
 (3r)-3-cyclopentyl-7-[(4-methylpiperazin-1-yl)sulfonyl]-3,4-dihydro-2h-1,2-benzothiazine 1,1-dioxide: experimental small molecule (0 associated side effects)  
 (3r)-3-cyclopentyl-6-methyl-7-[(4-methylpiperazin-1-yl)sulfonyl]-3,4-dihydro-2h-1,2-benzothiazine 1,1-dioxide: experimental small molecule (0 associated side effects)

64 known side effects mediated through drugs targeting this protein:

Agitation Agranulocytosis Anaemia Anaemia megaloblastic  
 Angioedema Anxiety Aplasia Apnoea Arthralgia  
 Asthenia Asthma Ataxia Body temperature increased  
 Bradycardia Confusional state Constipation Cytolytic  
 hepatitis Decreased appetite Delirium Depressed level of  
 consciousness Dermatitis Dermatitis exfoliative Diplopia  
 Dizziness Emotional disorder Fatigue Feeling abnormal  
 Hallucination Hangover Headache Hepatocellular injury  
 Hyperkinesia Hypersensitivity Hypotension Hypoventilation  
 Hypoxia Injection site reaction Insomnia  
 Irritability Lethargy Liver injury Loss of  
 consciousness Musculoskeletal discomfort Myalgia Nausea  
 Nervousness Nightmare Nystagmus Osteomalacia Pain  
 Phobia Pulmonary function test decreased Rash Respiratory  
 depression Respiratory failure Shock Somnolence Swelling  
 Syncope Tension Toxic epidermal necrolysis Urticaria  
 Vertigo Vomiting

\*\*\*\*\*  
 \*\*\*\*\*

High affinity immunoglobulin epsilon receptor gamma-subunit - Group: Receptor

Treated with:

benzylpenicilloyl polylysine: approved small molecule (0 associated side effects) For use as a adjunct in assessing the risk of administering penicillin (benzylpenicillin or penicillin G).

known side effects mediated through drugs targeting this protein:

\*\*\*\*\*  
 \*\*\*\*\*

Potassium channel subfamily K member 2 - Group: Channel

Treated with:

dofetilide: approved small molecule (59 associated side effects)

For the maintenance of normal sinus rhythm (delay in time to recurrence of atrial fibrillation/atrial flutter [AF/AF1]) in patients with atrial fibrillation/atrial flutter of greater than one week duration who have been converted to normal sinus rhythm

59 known side effects mediated through drugs targeting this protein:

Abdominal pain Acute coronary syndrome Angina pectoris  
 Angioedema Anxiety Arrhythmia supraventricular Arthralgia  
 Asthenia Atrioventricular block Back pain Bradycardia  
 Bundle branch block Cardiac arrest Cardiac disorder  
 Cardiac failure Cerebral ischaemia Cerebrovascular

accident Chest pain Cough Cytolytic hepatitis Death Dermatitis  
 Diarrhoea Dizziness Dyspnoea Gastrointestinal pain  
 Headache Hepatocellular injury Hyperhidrosis  
 Hypertension Infarction Infection Influenza Insomnia  
 Ischaemia Liver injury Loss of consciousness Migraine  
 Musculoskeletal discomfort Myocardial infarction Nausea  
 Oedema Oedema peripheral Pain Palpitations  
 Paraesthesia Paralysis flaccid Rash Respiratory tract  
 infection Shock Sudden death Supraventricular tachycardia  
 Syncope Tachycardia Torsade de pointes Urinary tract  
 infection VIIth nerve paralysis Ventricular fibrillation  
 Ventricular tachycardia

\*\*\*\*\*  
 \*\*\*\*\*

Solute carrier organic anion transporter family member 1B1 - Group:  
 Transporter

Treated with:

cyclosporine: approved biotech (0 associated side effects)  
 For treatment of transplant rejection, rheumatoid arthritis,  
 severe psoriasis

pravastatin: approved small molecule (147 associated side  
 effects) For the treatment of hypercholesterolemia and to reduce  
 the risk of cardiovascular disease.

valsartan: approved small molecule (80 associated side effects)  
 May be used as a first line agent to treat uncomplicated  
 hypertension, isolated systolic hypertension and left ventricular  
 hypertrophy. May be used as a first line agent to delay progression  
 of diabetic nephropathy. Losartan may be also used as a second line  
 agent in the treatment of congestive heart failure, systolic  
 dysfunction, myocardial infarction and coronary artery disease in  
 those intolerant of ACE inhibitors.

troglitazone: withdrawn small molecule (32 associated side  
 effects) For the treatment of Type II diabetes mellitus. It is  
 used alone or in combination with a sulfonylurea, metformin, or  
 insulin as an adjunct to diet and exercise.

pantoprazole: approved small molecule (321 associated side  
 effects) Short-term (up to 16 weeks) treatment of erosive  
 esophagitis.

nelfinavir: approved small molecule (87 associated side effects)  
 Used in combination with other antiviral drugs in the  
 treatment of HIV in both adults and children.

indinavir: approved small molecule (89 associated side effects)  
 Indinavir is an antiretroviral drug for the treatment of HIV  
 infection.

lovastatin: approved small molecule (100 associated side  
 effects) For management as an adjunct to diet to reduce elevated  
 total-C, LDL-C, apo B, and TG levels in patients with primary  
 hypercholesterolemia and mixed dyslipidemia. For primary prevention  
 of coronary heart disease and to slow progression of coronary  
 atherosclerosis in patients with coronary heart disease.

olmesartan: approved small molecule (0 associated side effects)  
 For the treatment of hypertension.

liothyronine: approved small molecule (0 associated side  
 effects) Used as replacement or supplemental therapy in patients

with hypothyroidism of any etiology, except transient hypothyroidism during the recovery phase of subacute thyroiditis.

conjugated estrogens: approved small molecule (219 associated side effects) For the treatment of moderate to severe vasomotor symptoms associated with the menopause, atrophic vaginitis, osteoporosis, hypoestrogenism due to hypogonadism, castration, primary ovarian failure, breast cancer (for palliation only), and Advanced androgen-dependent carcinoma of the prostate (for palliation only)

aminohippurate: approved small molecule (0 associated side effects) Used to measure effective renal plasma flow (ERPF) and to determine the functional capacity of the tubular excretory mechanism.

digoxin: approved small molecule (56 associated side effects) For the treatment and management of congestive cardiac insufficiency, arrhythmias and heart failure.

rosiglitazone: approved small molecule (57 associated side effects) For the treatment of Type II diabetes mellitus

cerivastatin: withdrawn small molecule (118 associated side effects) Used as an adjunct to diet for the reduction of elevated total and LDL cholesterol levels in patients with primary hypercholesterolemia and mixed dyslipidemia (Fredrickson Types IIa and IIb) when the response to dietary restriction of saturated fat and cholesterol and other non-pharmacological measures alone has been inadequate.

ritonavir: approved small molecule (297 associated side effects) Indicated in combination with other antiretroviral agents for the treatment of HIV-infection.

casposfungin: approved small molecule (76 associated side effects) For the treatment of esophageal candidiasis and invasive aspergillosis in patients who are refractory to or intolerant of other therapies.

methotrexate: approved small molecule (209 associated side effects) For the treatment of gestational choriocarcinoma, chorioadenoma destruens and hydatidiform mole. Also for the treatment of severe psoriasis and severe, active, classical or definite rheumatoid arthritis.

l-carnitine: approved small molecule (0 associated side effects) For treatment of primary systemic carnitine deficiency, a genetic impairment of normal biosynthesis or utilization of levocarnitine from dietary sources, or for the treatment of secondary carnitine deficiency resulting from an inborn error of metabolism such as glutaric aciduria II, methyl malonic aciduria, propionic acidemia, and medium chain fatty acylCoA dehydrogenase deficiency. Used therapeutically to stimulate gastric and pancreatic secretions and in the treatment of hyperlipoproteinemias. Parenteral levocarnitine is indicated for the prevention and treatment of carnitine deficiency in patients with end-stage renal disease.

simvastatin: approved small molecule (116 associated side effects) For the treatment of hypercholesterolemia.

estrone: approved small molecule (0 associated side effects) For management of perimenopausal and postmenopausal symptoms.

verapamil: approved small molecule (113 associated side effects) For the treatment of hypertension, angina, and cluster headache prophylaxis.

sumatriptan: approved small molecule (317 associated side effects) For the treatment of migraine attacks with or without aura.

irinotecan: approved small molecule (140 associated side effects) For the treatment of metastatic colorectal cancer (first-line therapy when administered with 5-fluorouracil and leucovorin). Also used in combination with cisplatin for the treatment of extensive small cell lung cancer. Irinotecan is currently under investigation for the treatment of metastatic or recurrent cervical cancer.

estradiol: approved small molecule (315 associated side effects) For the treatment of urogenital symptoms associated with post-menopausal atrophy of the vagina (such as dryness, burning, pruritus and dyspareunia) and/or the lower urinary tract (urinary urgency and dysuria).

penicillamine: approved small molecule (0 associated side effects) For treatment of Wilson's disease, cystinuria and active rheumatoid arthritis.

sirolimus: approved small molecule (0 associated side effects)  
For the prophylaxis of organ rejection in patients receiving renal transplants.

quinidine: approved small molecule (146 associated side effects) For the treatment of ventricular pre-excitation and cardiac dysrhythmias

dinoprostone: approved small molecule (0 associated side effects) For the termination of pregnancy during the second trimester (from the 12th through the 20th gestational week as calculated from the first day of the last normal menstrual period), as well as for evacuation of the uterine contents in the management of missed abortion or intrauterine fetal death up to 28 weeks of gestational age as calculated from the first day of the last normal menstrual period. Also used in the management of nonmetastatic gestational trophoblastic disease (benign hydatidiform mole). Other indications include improving the cervical inducibility (cervical "ripening") in pregnant women at or near term with a medical or obstetrical need for labor induction, and the management of postpartum hemorrhage.

ezetimibe: approved small molecule (52 associated side effects)  
For use as adjunctive therapy to diet for the reduction of elevated total-C, LDL-C, and Apo B in patients with primary (heterozygous familial and non-familial) hypercholesterolemia.

rifampin: approved small molecule (0 associated side effects)  
For the treatment of Tuberculosis and Tuberculosis-related mycobacterial infections.

penicillin G: approved small molecule (0 associated side effects) For use in the treatment of severe infections caused by penicillin G-susceptible microorganisms when rapid and high penicillin levels are required such as in the treatment of septicemia, meningitis, pericarditis, endocarditis and severe pneumonia.

atorvastatin: approved small molecule (195 associated side effects) May be used as primary prevention in individuals with multiple risk factors for coronary heart disease (CHD) and as secondary prevention in individuals with CHD to reduce the risk of myocardial infarction (MI), stroke, angina, and revascularization



procedures. May be used to reduce the risk of cardiovascular events in patients with acute coronary syndrome (ACS). May be used in the treatment of primary hypercholesterolemia and mixed dyslipidemia, homozygous familial hypercholesterolemia, primary dysbetalipoproteinemia, and/or hypertriglyceridemia as an adjunct to dietary therapy to decrease serum total and low-density lipoprotein cholesterol (LDL-C), apolipoprotein B (apoB), and triglyceride concentrations, while increasing high-density lipoprotein cholesterol (HDL-C) levels.

ouabain: approved small molecule (0 associated side effects)

For the treatment of atrial fibrillation and flutter and heart failure

pioglitazone: approved small molecule (36 associated side effects) Treatment of Type II diabetes mellitus

saquinavir: approved small molecule (321 associated side effects) For the treatment of HIV-1 with advanced immunodeficiency together with antiretroviral nucleoside analogues.

gemfibrozil: approved small molecule (91 associated side effects) For treatment of adult patients with very high elevations of serum triglyceride levels (types IV and V hyperlipidemia) who are at risk of developing pancreatitis (inflammation of the pancreas) and who do not respond adequately to a strict diet.

bezafibrate: approved small molecule (57 associated side effects) For the treatment of primary hyperlipidaemia types IIa, IIb, III, IV and V (Fredrickson classification) corresponding to groups I, II and III of the European Atherosclerosis Society guidelines - when diet alone or improvements in lifestyle such as increased exercise or weight reduction do not lead to an adequate response. Also for the treatment of secondary hyperlipidaemias, e.g. severe hypertriglyceridemias, when sufficient improvement does not occur after correction of the underlying disorder (e.g. diabetes mellitus).

liotrix: approved small molecule (0 associated side effects)

May be used to treat primary, secondary or tertiary hypothyroidism. May also be used to suppress thyroid stimulating hormone (TSH) secretion in patients with simple (nontoxic) goiter, subacute or chronic lymphocytic thyroiditis multinodular goiter, and in the management of thyroid cancer. May be used in conjunction with other antithyroid agents to treat thyrotoxicosis to prevent goitrogenesis and hypothyroidism. May also be used for differential diagnosis of suspected mild hyperthyroidism or thyroid gland autonomy.

hyperforin: nutraceutical small molecule (0 associated side effects)

cholic acid: experimental small molecule (0 associated side effects)

taurocholic acid: experimental small molecule (0 associated side effects)

acetylcysteine: approved small molecule (0 associated side effects) Acetylcysteine is used mainly as a mucolytic and in the management of paracetamol (acetaminophen) overdose.

1032 known side effects mediated through drugs targeting this protein:

5q minus syndrome Abdominal discomfort Abdominal distension  
 Abdominal pain Abdominal pain lower Abdominal pain upper  
 Abdominal tenderness Abnormal dreams Abnormal faeces  
 Abscess Acidosis Acne Acute coronary syndrome Acute  
 interstitial pneumonitis Acute leukaemia Acute myeloid  
 leukaemia Acute respiratory distress syndrome Acute tonsillitis  
 Adrenal insufficiency Affect lability Ageusia Aggression  
 Agitation Agranulocytosis Akathisia Akinesia Alanine  
 aminotransferase increased Albuminuria Alcohol intolerance  
 Alopecia Alveolitis Alveolitis allergic Alveolitis  
 fibrosing Amblyopia Amenorrhoea Amnesia Anaemia Anal  
 pruritus Anaphylactic shock Anaphylactoid reaction Aneurysm  
 Angina pectoris Angioedema Angiopathy Anorectal discomfort  
 Anorectal disorder Antinuclear antibody positive  
 Anxiety Aortic aneurysm Aortic dissection Apathy  
 Aphasia Aphthous stomatitis Aplastic anaemia  
 Appendicitis Application site reaction Arrhythmia  
 Arterial occlusive disease Arterial thrombosis  
 Arteriosclerosis Arteriospasm coronary Arteritis Arthralgia  
 Arthritis Arthropathy Artificial menopause Ascites  
 Aspartate aminotransferase increased Assisted fertilisation  
 Asthenia Asthma Ataxia Atopy Atrial fibrillation  
 Atrial tachycardia Atrioventricular block complete  
 Atrioventricular block first degree Atrioventricular block  
 second degree Atrioventricular dissociation Atrophy  
 Autonomic neuropathy Azoospermia Azotaemia Back pain  
 Bacteraemia Bacterial infection Balance disorder Balanitis  
 Basal cell carcinoma Benign neoplasm Benign vaginal  
 neoplasm Biliary colic Bladder cancer Bladder disorder  
 Bladder neoplasm Bladder pain Blepharitis Blindness  
 Blindness transient Blister Blood albumin decreased  
 Blood alkaline phosphatase increased Blood bicarbonate  
 decreased Blood bilirubin increased Blood cholesterol increased  
 Blood creatine phosphokinase increased Blood creatinine  
 increased Blood disorder Blood glucose decreased Blood  
 glucose increased Blood lactate dehydrogenase increased Blood  
 magnesium decreased Blood phosphorus increased Blood potassium  
 decreased Blood potassium increased Blood pressure increased  
 Blood prolactin increased Blood thyroid stimulating hormone  
 increased Blood triglycerides increased Blood urea increased  
 Blood uric acid increased Body temperature decreased Body  
 temperature increased Bone disorder Bone pain Bradycardia  
 Breast cancer Breast cancer in situ Breast cancer stage IV  
 Breast discharge Breast discomfort Breast disorder Breast  
 engorgement Breast enlargement Breast feeding Breast  
 malformation Breast mass Breast neoplasm Breast pain Breast  
 swelling Breast tenderness Breath odour Bronchitis  
 Bronchospasm Bundle branch block Bundle branch block  
 right Burning sensation Bursitis Cachexia Caecitis Calculus  
 urinary Candidiasis Carbohydrate tolerance decreased Cardiac  
 arrest Cardiac disorder Cardiac failure Cardiac failure  
 congestive Cardiac fibrillation Cardiac flutter Cardiac murmur  
 Cardiac valve disease Cardioactive drug level  
 Cardiomyopathy Cardiovascular disorder Carpal tunnel  
 syndrome Cataract Cell death Cells in urine Cellulitis

Cerebral artery thrombosis Cerebral haemorrhage Cerebral  
 infarction Cerebral ischaemia Cerebral thrombosis Cerebral  
 venous thrombosis Cerebrovascular accident Cerebrovascular  
 disorder Cervical discharge Cervix carcinoma Cervix disorder  
 Chalazion Cheilitis Chest discomfort Chest pain Chills  
 Chloasma Cholangitis Cholangitis sclerosing Cholecystitis  
 Cholelithiasis Cholestasis Chorea Choreoathetosis  
 Coagulopathy Cognitive disorder Cold sweat Colitis  
 ischaemic Colitis ulcerative Colon cancer Colorectal cancer  
 metastatic Coma hepatic Completed suicide Conduction disorder  
 Confusional state Congenital generalised lipodystrophy  
 Conjunctivitis Connective tissue disorder Constipation  
 Contact lens intolerance Conversion disorder Convulsion  
 Coordination abnormal Coronary artery thrombosis Cough  
 Creatinine renal clearance decreased Cryptococcosis  
 Crystal urine Crystalluria Cutaneous vasculitis  
 Cyanosis Cyst Cystitis Cystitis noninfective Cytolytic  
 hepatitis Cytomegalovirus chorioretinitis Cytomegalovirus  
 infection Deafness Death Decreased appetite Deep vein  
 thrombosis Deficiency anaemia Deformity Dehydration Delirium  
 Dementia Dental plaque Dependence Depersonalisation  
 Depressed level of consciousness Depression Depressive  
 symptom Dermatitis Dermatitis atopic Dermatitis bullous  
 Dermatitis contact Dermatitis exfoliative Dermatomyositis  
 Diabetes mellitus Diabetic retinal oedema Diarrhoea  
 Diarrhoea haemorrhagic Diplegia Diplopia Discomfort  
 Disease progression Disorientation Disseminated  
 intravascular coagulation Dissociation Disturbance in sexual  
 arousal Diverticulitis Dizziness Drug abuse Drug eruption  
 Drug interaction Drug rash with eosinophilia and systemic  
 symptoms Dry eye Dry mouth Dry skin Duodenal ulcer  
 Duodenitis Dysaesthesia Dysarthria Dyschezia Dysentery  
 Dysgeusia Dyskinesia Dysmenorrhoea Dyspepsia Dysphagia  
 Dysphonia Dysplasia Dyspnoea Dysthymic disorder  
 Dystonia Dysuria Ear disorder Ear infection Ear  
 pain Ecchymosis Ectropion of cervix Eczema Effusion  
 Ejaculation disorder Elderly Electrocardiogram PR  
 interval Electrocardiogram PR prolongation Electrocardiogram ST  
 segment Electrocardiogram ST segment depression Electrocardiogram  
 abnormal Electrocardiogram change Electrocardiogram normal  
 Electrolyte imbalance Embolism Embolism venous Emotional  
 disorder Emotional distress Encephalopathy Endocrine  
 disorder Endometrial cancer Endometrial disorder Endometrial  
 hypertrophy Endometriosis Enteritis Enzyme abnormality  
 Eosinophilia Epididymitis Epilepsy Epistaxis  
 Erectile dysfunction Eructation Erythema Erythema  
 multiforme Erythema nodosum Euphoric mood Extrapyrmidal  
 disorder Extrasystoles Extravasation Eye disorder Eye  
 haemorrhage Eye infection Eye inflammation Eye irritation Eye  
 oedema Eye pain Eye pruritus Eyelid oedema Face oedema  
 Facial pain Facial paresis Factor VIII deficiency Faecal  
 incontinence Faeces discoloured Family stress Fasting  
 Fat redistribution Fat tissue increased Fatigue  
 Febrile neutropenia Feeling abnormal Feeling cold  
 Feeling hot Feeling of body temperature change Fibrocystic

breast disease    Fibrosis    Flank pain    Flat affect    Flatulence    Fluid  
 retention    Flushing    Foetal disorder    Foetor hepaticus  
           Folliculitis            Frequent bowel movements            Fungal infection  
           Fungal skin infection    Furuncle            Gait disturbance  
           Galactorrhoea            Gallbladder disorder            Gamma-  
 glutamyltransferase decreased            Gamma-glutamyltransferase  
 increased    Gastric disorder    Gastric polyps            Gastric ulcer  
           Gastritis    Gastroenteritis            Gastrointestinal candidiasis  
           Gastrointestinal carcinoma            Gastrointestinal disorder  
           Gastrointestinal haemorrhage            Gastrointestinal necrosis  
           Gastrointestinal pain            Gastrointestinal toxicity  
           Gastrointestinal ulcer            Gastrooesophageal reflux disease  
           Generalised oedema            Genital candidiasis            Genital discharge  
           Genital disorder female            Gingival bleeding            Gingival  
 hyperplasia    Gingivitis    Glaucoma            Glossitis            Glossodynia    Glucose  
 tolerance decreased            Glucose tolerance impaired            Glycosuria  
           Goitre            Gout    Grand mal convulsion            Granulomatous liver  
 disease            Gynaecomastia            Haemangioma            Haemarthrosis  
           Haematemesis            Haematochezia            Haematocrit decreased  
           Haematological malignancy            Haematoma            Haematuria            Haemoglobin  
           Haemoglobin decreased            Haemoglobinuria            Haemolytic anaemia  
           Haemolytic uraemic syndrome            Haemoptysis            Haemorrhage            Haemorrhage  
 intracranial            Haemorrhage urinary tract            Haemorrhagic disorder  
           Haemorrhagic stroke            Haemorrhoids            Hallucination            Hand  
 and foot syndrome secondary to sickle cell anaemia            Headache  
           Hearing impaired            Heart rate irregular            Hemiparesis            Hemiplegia  
           Hepatic cancer metastatic            Hepatic cirrhosis            Hepatic enzyme  
 increased            Hepatic failure            Hepatic function abnormal            Hepatic  
 necrosis            Hepatic neoplasm malignant            Hepatic pain            Hepatic  
 steatosis            Hepatitis acute            Hepatitis chronic active  
           Hepatobiliary disease            Hepatocellular injury            Hepatomegaly  
           Hepatosplenomegaly            Hereditary angioedema            Hernia  
           Herpes simplex            Herpes virus infection            Herpes zoster  
           Hiccups            Hirsutism            Histoplasmosis            Hormone level abnormal  
           Hot flush            Hunger            Hydronephrosis            Hyperaemia  
           Hyperaesthesia            Hyperamylasaemia            Hyperbilirubinaemia  
           Hypercalcaemia            Hypercholesterolaemia            Hyperglycaemia  
           Hyperhidrosis            Hyperkalaemia            Hyperkeratosis  
           Hyperkinesia            Hyperlactacidaemia            Hyperlipidaemia  
           Hypernatraemia            Hyperphosphataemia            Hyperplasia  
           Hyperprolactinaemia            Hyperreflexia            Hypersensitivity  
           Hypertension            Hypertonia            Hypertriglyceridaemia  
           Hypertrophic cardiomyopathy            Hypertrophy            Hyperuricaemia  
           Hypervigilance            Hypoaesthesia            Hypoaesthesia facial  
           Hypoaesthesia oral            Hypocalcaemia            Hypochromic anaemia  
           Hypogammaglobulinaemia            Hypoglycaemia            Hypokalaemia  
           Hypokinesia            Hypomagnesaemia            Hyponatraemia            Hypophosphataemia  
           Hypoprothrombinaemia            Hyporeflexia            Hypotension            Hypothermia  
           Hypothyroidism            Hypoventilation            Hypovitaminosis            Hypoxia  
           IIIRD nerve paralysis            Ichthyosis            Ichthyosis acquired            Idiopathic  
 pulmonary fibrosis            Idiopathic thrombocytopenic purpura  
           Ileitis            Ileus            Ileus paralytic            Ill-defined disorder  
           Immune system disorder            Incontinence            Increased appetite  
           Induration            Infarction            Infection            Infertility            Infertility male  
           Infestation            Inflammation            Influenza            Influenza like illness

Ingrowing nail Injection site pain Injection site  
 reaction Injection site thrombosis Insomnia Insulin  
 resistance Intermittent claudication Interstitial lung disease  
 Intervertebral disc disorder Intestinal ischaemia Intestinal  
 obstruction Intestinal perforation Intra-uterine death  
 Intracranial pressure increased Iritis Iron deficiency  
 Iron deficiency anaemia Irritability Ischaemia  
 Ischaemic stroke Jaundice Jaundice cholestatic Joint  
 swelling Keratitis Keratoconjunctivitis sicca Ketoacidosis  
 Ketonuria Laboratory test abnormal Lacrimal disorder  
 Lacrimation decreased Lacrimation increased Laryngeal  
 disorder Laryngeal oedema Laryngitis Laryngospasm Leiomyoma  
 Lens disorder Lenticular opacities Lethargy Leukaemia  
 Leukocytoclastic vasculitis Leukocytosis  
 Leukoencephalopathy Leukopenia Libido decreased Libido  
 increased Lichenoid keratosis Lip dry Lipase increased  
 Lipoatrophy Lipodystrophy acquired Lipohypertrophy Liver  
 disorder Liver function test abnormal Liver injury Loss of  
 consciousness Loss of libido Lower respiratory tract infection  
 Lung cancer metastatic Lung disorder Lung infection Lung  
 infiltration Lung neoplasm Lupus-like syndrome  
 Lymphadenopathy Lymphocytosis Lymphoma Lymphopenia  
 Lymphoproliferative disorder Macular oedema Macule  
 Maculopathy Malaise Malignant melanoma Mammogram  
 abnormal Mania Mantle cell lymphoma Mass Mediastinal disorder  
 Medical device complication Megacolon Melaena Memory  
 impairment Meniere's disease Meningioma benign Meningitis Meningitis  
 aseptic Menopausal symptoms Menopause Menorrhagia Menstrual  
 disorder Menstruation irregular Mental disability Mental disorder  
 Mesenteric vascular insufficiency Metabolic acidosis  
 Metabolic disorder Metastases to liver Metastasis  
 Metrorrhagia Microcytic anaemia Micturition disorder  
 Micturition urgency Migraine Miosis Molluscum  
 contagiosum Monoplegia Mood swings Motor dysfunction Mouth ulceration  
 Movement disorder Mucosal inflammation Mucosal ulceration  
 Muscle atrophy Muscle contractions involuntary Muscle  
 contracture Muscle fatigue Muscle rigidity Muscle spasms  
 Muscle tightness Muscle twitching Muscular weakness  
 Musculoskeletal deformity Musculoskeletal discomfort  
 Musculoskeletal disorder Musculoskeletal pain  
 Musculoskeletal stiffness Myalgia Mydriasis Myeloid  
 leukaemia Myeloproliferative disorder Myocardial infarction  
 Myocardial ischaemia Myoglobinuria Myopathy Myositis  
 Nail disorder Nasal congestion Nasal inflammation  
 Nasopharyngitis Nausea Neck pain Necrosis Neoplasm  
 Neoplasm malignant Nephritis Nephrolithiasis Nephropathy  
 Nerve root lesion Nervous system disorder Nervousness  
 Neuralgia Neuritis Neuropathy peripheral Neurosis  
 Neutropenia Neutropenic infection Neutropenic sepsis Night  
 blindness Night sweats Nightmare Nipple pain Nocardiosis  
 Nocturia Nodule Nuchal rigidity Nystagmus Obstruction  
 Obstructive airways disorder Oedema Oedema genital  
 Oedema peripheral Oesophageal achalasia Oesophageal disorder  
 Oesophageal haemorrhage Oesophageal ulcer Oesophagitis  
 Oestrogenic effect Oligomenorrhoea Onychomycosis

Ophthalmoplegia Opportunistic infection Optic ischaemic  
 neuropathy Optic nerve disorder Optic neuritis Oral candidiasis  
 Oral pruritus Oropharyngeal candidiasis Oropharyngeal  
 discomfort Oropharyngeal pain Orthostatic hypotension  
 Osteoarthritis Osteoarthropathy Osteonecrosis  
 Osteoporosis Otitis externa Otitis media Ovarian  
 cancer Ovarian cyst Pain Pain in extremity Pain in jaw Pain  
 of skin Pallor Palmar-plantar erythrodysesthesia syndrome  
 Palpitations Pancreatic disorder Pancreatitis  
 Pancytopenia Panic disorder Panic reaction  
 Panniculitis Papilloma Paraesthesia Paraesthesia oral  
 Paralysis Paresis Parity Paronychia Parosmia  
 Pathological fracture Pelvic pain Penis disorder Peptic  
 ulcer Pericardial effusion Pericarditis Perineal pain  
 Periodontitis Peripheral embolism Peripheral sensory  
 neuropathy Peripheral vascular disorder Peritonsillar abscess  
 Personality change Personality disorder Petechiae  
 Pharyngeal haemorrhage Pharyngitis Phlebitis Phobia  
 Phonophobia Photophobia Photopsia Photosensitivity reaction  
 Pigmentation disorder Piloerection Pituitary tumour  
 Plasmodium falciparum infection Platelet count decreased  
 Pleural disorder Pleural effusion Pleural infection  
 Pneumocystis jiroveci pneumonia Pneumonia Pneumonia  
 cytomegaloviral Poisoning Poliomyelitis Pollakiuria  
 Polyarthritits Polydipsia Polymyalgia rheumatica Polyp  
 Polyuria Porphyria Porphyria non-acute Portal  
 hypertension Postmenopausal haemorrhage Precocious puberty  
 Prinzmetal angina Proctalgia Productive cough Progressive  
 multifocal leukoencephalopathy Prostatic disorder  
 Prostatomegaly Protein urine present Proteinuria Prurigo  
 Pruritus Pruritus generalised Pruritus genital  
 Pseudomembranous colitis Psoriasis Psychotic disorder  
 Puberty Pulmonary embolism Pulmonary fibrosis  
 Pulmonary function test decreased Pulmonary oedema Pulmonary  
 toxicity Pulse abnormal Purpura Pyelonephritis  
 Quadripareisis Radiculopathy Rales Rash Rash erythematous  
 Rash generalised Rash maculo-papular Rash papular Rash  
 pustular Raynaud's phenomenon Rectal haemorrhage Rectal  
 tenesmus Red blood cell sedimentation rate increased Refraction  
 disorder Regressive behaviour Regurgitation Renal cancer  
 Renal colic Renal failure Renal failure acute Renal  
 impairment Renal pain Renal tubular disorder Reproductive tract  
 disorder Respiration abnormal Respiratory depression Respiratory  
 disorder Respiratory distress Respiratory failure Respiratory  
 tract infection Retching Retinal artery occlusion Retinal  
 oedema Retinal vascular disorder Retinal vascular occlusion  
 Retinal vein thrombosis Retinitis pigmentosa Retinogram  
 abnormal Rhabdomyolysis Rhinitis Rhinitis allergic Salivary  
 gland disorder Salivary gland enlargement Salivary  
 hypersecretion Sarcoma Scleral disorder Scotoma Scrotal  
 oedema Seborrhoeic dermatitis Secondary adrenocortical  
 insufficiency Sedation Sensation of pressure Sensory  
 disturbance Sensory loss Sepsis Sexual dysfunction Shock  
 Sialoadenitis Sicca syndrome Sinus arrest Sinus  
 arrhythmia Sinus bradycardia Sinus congestion Sinus headache

Sinusitis Skin burning sensation Skin discolouration Skin  
 disorder Skin exfoliation Skin hyperpigmentation Skin hypertrophy  
 Skin irritation Skin mass Skin necrosis Skin papilloma  
 Skin tightness Skin ulcer Skin wrinkling Sleep disorder  
 Smear cervix abnormal Social avoidant behaviour Soft tissue  
 necrosis Somnolence Speech disorder Spinal cord disorder  
 Splenomegaly Staphylococcal infection Stevens-Johnson  
 syndrome Sticky skin Stomatitis Stupor Subarachnoid  
 haemorrhage Subcutaneous nodule Subdural haematoma Substance  
 abuse Sudden death Sudden visual loss Suicide attempt  
 Supraventricular extrasystoles Swelling Swelling face  
 Syncope Synovitis Systemic lupus erythematosus Tachycardia  
 Tachypnoea Telangiectasia Temperature intolerance  
 Temporal arteritis Tenderness Tendinous contracture  
 Tendonitis Tenosynovitis Tension Tension headache  
 Tetany Thinking abnormal Thirst Thought blocking  
 Throat irritation Thrombocytopenia Thrombocytopenic purpura  
 Thrombocytosis Thrombophlebitis Thrombophlebitis superficial  
 Thrombosis Thrombotic thrombocytopenic purpura Tinnitus  
 Tongue discolouration Tongue disorder Tongue oedema  
 Tonsillitis Tooth abscess Tooth disorder Toothache  
 Torsade de pointes Torticollis Toxic epidermal necrolysis  
 Toxic shock syndrome Toxicity to various agents  
 Tracheobronchitis Transaminases increased Transient  
 ischaemic attack Tremor Tubulointerstitial nephritis Tumour  
 lysis syndrome Ulcer Upper respiratory tract infection Ureteric  
 obstruction Urethral disorder Urethral pain Urethritis Urinary  
 incontinence Urinary retention Urinary tract disorder Urinary  
 tract infection Urine abnormality Urine analysis abnormal Urine  
 output increased Urogenital disorder Urticaria Uterine cancer  
 Uterine cervical erosion Uterine enlargement Uterine  
 haemorrhage Uterine leiomyoma Uterine pain Uterine spasm  
 Uveitis VIIIth nerve paralysis Vaginal discharge Vaginal  
 disorder Vaginal haemorrhage Vaginal infection Vaginal  
 inflammation Vaginal neoplasm Vaginal ulceration Vaginismus  
 Varicose vein Vascular occlusion Vascular purpura  
 Vascular resistance systemic Vasculitis Vasoconstriction  
 Vasodilatation Vasodilation procedure Vasospasm Venous  
 thrombosis Ventricular extrasystoles Ventricular fibrillation  
 Ventricular tachycardia Vertigo Vestibular disorder  
 Viral infection Vision blurred Visual acuity reduced  
 Visual impairment Vitreous disorder Volume blood increased  
 Vomiting Vulval disorder Vulvovaginal candidiasis  
 Vulvovaginal discomfort Vulvovaginal mycotic infection  
 Vulvovaginal pain Vulvovaginal pruritus Vulvovaginitis  
 Weight decreased Weight increased Wheezing White blood cells  
 urine positive Withdrawal bleed X-linked lymphoproliferative  
 syndrome Xanthomatosis Xanthopsia Xeroderma Xerophthalmia  
 Yawning

\*\*\*\*\*  
 \*\*\*\*\*

Sodium channel subunit beta-3 - Group: Channel  
 Treated with:

zonisamide: approved small molecule (190 associated side effects) For use as adjunctive treatment of partial seizures in adults with epilepsy.

190 known side effects mediated through drugs targeting this protein:

Abdominal pain Abnormal dreams Acne Agitation Alanine  
aminotransferase increased Albuminuria Alopecia Amblyopia  
Amenorrhoea Anaemia Anxiety Apnoea Arthralgia  
Arthritis Aspartate aminotransferase increased Asthenia  
Ataxia Atrial fibrillation Bladder pain Blood  
lactate dehydrogenase increased Bradycardia Calculus bladder  
Cardiac failure Cardiac fibrillation Cerebrovascular  
accident Chest pain Cholangitis Cholecystitis Cholelithiasis  
Cognitive disorder Colitis Confusional state  
Conjunctivitis Constipation Convulsion Coordination  
abnormal Cough Deafness Decreased appetite Dehydration  
Depressed level of consciousness Dermatitis Dermatitis  
bullous Diarrhoea Diplopia Discomfort Disturbance in sexual  
arousal Dizziness Dry mouth Dry skin Duodenal ulcer  
Duodenitis Dysarthria Dysgeusia Dyskinesia Dyspepsia  
Dysphagia Dyspnoea Dystonia Dysuria Ecchymosis  
Eczema Embolism Encephalopathy Enuresis Erectile  
dysfunction Euphoric mood Extrasystoles Face oedema Faecal  
incontinence Fatigue Feeling abnormal Flank pain Flatulence  
Gait disturbance Gastritis Gastroenteritis Gastrointestinal  
pain Gingival bleeding Gingival hyperplasia Gingivitis Glaucoma  
Glossitis Gynaecomastia Haematemesis Haematuria  
Haemoglobin Haemoptysis Haemorrhage Headache Hirsutism  
Hyperaesthesia Hyperhidrosis Hyperkinesia Hyperplasia  
Hyperreflexia Hypersensitivity Hypertension Hypertonia  
Hypoglycaemia Hypokinesia Hyponatraemia Hypotension  
Hypotonia Ill-defined disorder Immunodeficiency  
Incontinence Influenza Insomnia Iritis  
Irritability Jaundice Jaundice cholestatic Leukopenia  
Libido decreased Loss of consciousness Lymphadenopathy  
Malaise Mastitis Melaena Menorrhagia Microcytic  
anaemia Micturition urgency Mouth ulceration Movement disorder  
Muscle relaxant therapy Muscle rigidity Muscle spasms  
Muscle twitching Muscular weakness Musculoskeletal discomfort  
Musculoskeletal stiffness Myalgia Myoclonus Nausea  
Nervousness Neuritis Neuropathy peripheral Nocturia  
Nuchal rigidity Nystagmus Oculogyric crisis Oedema  
Oedema peripheral Oesophagitis Osteoarthritis Pain  
Palpitations Paraesthesia oral Paralysis Parosmia  
Petechiae Pharyngitis Photophobia Pollakiuria Polyuria  
Pruritus Psychotic disorder Pulmonary embolism Rash  
Rash maculo-papular Rash pustular Rectal haemorrhage  
Rhinitis Scotoma Shock Somnolence Speech disorder  
Stomatitis Syncope Systemic lupus erythematosus Tachycardia  
Tension Thirst Thrombocytopenia Thrombophlebitis  
Tinnitus Tremor Ulcer Urinary incontinence Urinary  
retention Urine output increased Urticaria VIIth nerve paralysis  
Vascular insufficiency Ventricular extrasystoles Vertigo  
Vomiting Weight decreased Weight increased



\*\*\*\*\*  
\*\*\*\*\*

T-cell receptor beta chain C region - Group: Receptor

Treated with:

3-indolebutyric acid: experimental small molecule (0 associated side effects)

known side effects mediated through drugs targeting this protein:

\*\*\*\*\*  
\*\*\*\*\*

Succinate receptor 1 - Group: Receptor

Treated with:

succinic acid: approved,nutraceutical small molecule (0 associated side effects) For nutritional supplementation, also for treating dietary shortage or imbalance

known side effects mediated through drugs targeting this protein:

\*\*\*\*\*  
\*\*\*\*\*

Gamma-aminobutyric-acid receptor subunit alpha-1 - Group: Channel

Treated with:

lorazepam: approved small molecule (126 associated side effects) For the management of anxiety disorders, and for treatment of status epilepticus.

ethchlorvynol: illicit,approved small molecule (0 associated side effects) Used for short-term hypnotic therapy in the management of insomnia for periods of up to one week in duration; however, this medication generally has been replaced by other sedative-hypnotic agents.

enflurane: approved small molecule (15 associated side effects) Used for the induction and maintenance of general anaesthesia during surgery and cesarean section and also used for analgesia during vaginal delivery.

temazepam: approved small molecule (35 associated side effects) For the short-term treatment of insomnia (generally 7-10 days).

butabarbital: illicit,approved small molecule (0 associated side effects) For short-term treatment of insomnia and anxiety disorders

butalbital: illicit,approved small molecule (0 associated side effects) Used in combination with acetaminophen or aspirin and caffeine for its sedative and relaxant effects in the treatment of tension headaches, migraines, and pain.

topiramate: approved small molecule (365 associated side effects) Used for the treatment and control of partial seizures and severe tonic-clonic (grand mal) seizures and also for the prevention of migraine headaches. In children it is also used for treatment of Lennox-Gastaut syndrome.

etomidate: approved small molecule (27 associated side effects) Used in the induction of general anesthesia.

talbutal: illicit,approved small molecule (0 associated side effects) For use as a sedative and hypnotic.

pentobarbital: approved small molecule (38 associated side effects) For the short-term treatment of insomnia.

clobazam: illicit,approved small molecule (58 associated side effects) For treatment and management of epilepsy and anxiety disorder.

meprobamate: illicit,approved small molecule (54 associated side effects) For the management of anxiety disorders or for the short-term relief of the symptoms of anxiety.

eszopiclone: approved small molecule (0 associated side effects) For the treatment of insomnia

alprazolam:illicit,approved small molecule (178 associated side effects) For the management of anxiety disorder or the short-term relief of symptoms of anxiety and for the treatment of panic disorder, with or without agoraphobia.

secobarbital: approved small molecule (38 associated side effects) For the Short-term treatment of intractable insomnia for patients habituated to barbiturates

zolpidem: approved small molecule (282 associated side effects) For the short-term treatment of insomnia.

metharbital: approved small molecule (0 associated side effects) Metharbital is used for the treatment of epilepsy.

picotoxin: approved small molecule (0 associated side effects)  
Used internally for relieving respiratory distress. Also for use as an antidote in poisoning by CNS depressants, especially barbiturates.

methohexital: approved small molecule (34 associated side effects) Methohexital is indicated for use as an intravenous anaesthetic. It has also been commonly used to induce deep sedation.

chlordiazepoxide:illicit,approved small molecule (20 associated side effects) For the management of anxiety disorders or for the short-term relief of symptoms of anxiety, withdrawal symptoms of acute alcoholism, and preoperative apprehension and anxiety.

amoxapine: approved small molecule (103 associated side effects) For the relief of symptoms of depression in patients with neurotic or reactive depressive disorders as well as endogenous and psychotic depressions. May also be used to treat depression accompanied by anxiety or agitation.

adinazolam: approved small molecule (0 associated side effects)  
For the treatment of anxiety and status epilepticus.

thiopental: approved small molecule (0 associated side effects)  
For use as the soleanesthetic agent for brief (15 minute) procedures, for induction of anesthesia prior to administration of other anesthetic agents, to supplement regional anesthesia, to provide hypnosis during balanced anesthesia with other agents for analgesia or muscle relaxation, for the control of convulsive states during or following inhalation anesthesia or local anesthesia, in neurosurgical patients with increased intracranial pressure, and for narcoanalysis and narcosynthesis in psychiatric disorders.

clorazepate: illicit,approved small molecule (0 associated side effects) For the management of anxiety disorders or for the short-term relief of the symptoms of anxiety. Also used as adjunctive therapy in the management of partial seizures and for the symptomatic relief of acute alcohol withdrawal.

midazolam: illicit,approved small molecule (119 associated side effects) For use as a sedative perioperatively.

flurazepam: illicit, approved small molecule (62 associated side effects) For short-term and intermittent use in patients with recurring insomnia and poor sleeping habits

isoflurane: approved small molecule (31 associated side effects) For induction and maintenance of general anesthesia.

primidone: approved small molecule (16 associated side effects) For the treatment of epilepsy

halazepam: illicit, approved small molecule (0 associated side effects) Used to relieve anxiety, nervousness, and tension associated with anxiety disorders.

diazepam: illicit, approved small molecule (149 associated side effects) Used in the treatment of severe anxiety disorders, as a hypnotic in the short-term management of insomnia, as a sedative and premedicant, as an anticonvulsant, and in the management of alcohol withdrawal syndrome.

progabide: approved small molecule (0 associated side effects) Indicated for the treatment of epilepsy.

oxazepam: approved small molecule (36 associated side effects) For the treatment of anxiety disorders and alcohol withdrawal.

methylphenobarbital: approved small molecule (37 associated side effects) For the relief of anxiety, tension, and apprehension, also used as an anticonvulsant for the treatment of epilepsy.

triazolam: illicit, approved, withdrawn small molecule (66 associated side effects) For the short-term treatment of insomnia.

ethanol: approved small molecule (11 associated side effects) For therapeutic neurolysis of nerves or ganglia for the relief of intractable chronic pain in such conditions as inoperable cancer and trigeminal neuralgia (tic douloureux), in patients for whom neurosurgical procedures are contraindicated.

zaleplon: illicit, approved small molecule (262 associated side effects) For the treatment of short-term treatment of insomnia in adults.

methoxyflurane: approved small molecule (0 associated side effects) For use in the induction and maintenance of general anesthesia

clonazepam: illicit, approved small molecule (228 associated side effects) Used as an anticonvulsant in the treatment of the Lennox-Gastaut syndrome (petit mal variant), akinetic and myoclonic seizures.

methyprylon: illicit, approved, withdrawn small molecule (0 associated side effects) For the treatment of insomnia.

thiamylal: approved small molecule (0 associated side effects) Used for the production of complete anaesthesia of short duration, for the induction of general anaesthesia, and for inducing a hypnotic state.

halothane: approved small molecule (10 associated side effects) For the induction and maintenance of general anesthesia

desflurane: approved small molecule (110 associated side effects) For use as an inhalation agent for induction and/or maintenance of anesthesia for inpatient and outpatient surgery in adults.

flumazenil: approved small molecule (100 associated side effects) For the complete or partial reversal of the sedative

effects of benzodiazepines in cases where general anesthesia has been induced and/or maintained with benzodiazepines, and where sedation has been produced with benzodiazepines for diagnostic and therapeutic procedures. Also for the management of benzodiazepine overdose as an adjunct for appropriate supportive and symptomatic measures.

estazolam: illicit,approved small molecule (131 associated side effects) For the short-term management of insomnia characterized by difficulty in falling asleep, frequent nocturnal awakenings, and/or early morning awakenings.

sevoflurane: approved small molecule (107 associated side effects) Used for induction and maintenance of general anesthesia in adult and pediatric patients for inpatient and outpatient surgery.

dihydroergotoxine: approved small molecule (0 associated side effects) For potential use in the treatment of Alzheimer's disease.

dihydroquinidine barbiturate: experimental small molecule (0 associated side effects)

amobarbital: illicit,approved small molecule (0 associated side effects)

aprobarbital: illicit,approved small molecule (0 associated side effects)

butethal: illicit,approved small molecule (0 associated side effects) For the treatment of insomnia.

heptabarbital: approved small molecule (0 associated side effects) Used mainly for sedation and hypnosis.

hexobarbital: approved small molecule (0 associated side effects) For the induction of anesthesia prior to the use of other general anesthetic agents and for induction of anesthesia for short surgical, diagnostic, or therapeutic procedures associated with minimal painful stimuli.

ginkgo biloba: approved,nutraceutical small molecule (0 associated side effects) Appears to be effective in: alleviating age-related memory impairment in some elderly people with mild to moderate age-related memory or cognitive impairment; improving cognitive function in healthy young to middle-aged people; improving symptoms of Alzheimer's, vascular or mixed dementia; improving damage to the visual field in patients with normal tension glaucoma; decreasing the number of painful attacks in patients with Raynaud's syndrome; and may improve symptoms of vertigo and dizziness in some patients.

glutethimide: illicit,approved small molecule (0 associated side effects) For the treatment of insomnia.

barbituric acid derivative: illicit,experimental small molecule (0 associated side effects)

bromazepam: illicit,approved small molecule (47 associated side effects) For the short-term treatment of insomnia, short-term treatment of anxiety or panic attacks, if a benzodiazepine is required, and the alleviation of the symptoms of alcohol- and opiate-withdrawal.

clotiazepam: illicit,approved small molecule (0 associated side effects) For the treatment of anxiety disorders.

fludiazepam: illicit,approved small molecule (0 associated side effects) Used for the short-term treatment of anxiety disorders.

ketazolam: approved small molecule (0 associated side effects) Ketazolam could be used for the treatment of anxiety. In approved countries, it is indicated for the treatment of anxiety, tension, irritability and similar stress related symptoms.

prazepam: illicit,approved small molecule (0 associated side effects) For the treatment of anxiety disorders.

quazepam: illicit,approved small molecule (0 associated side effects) Used to treat insomnia.

cinolazepam: approved small molecule (0 associated side effects) For the management of anxiety disorders or for the short-term relief of the symptoms of anxiety or anxiety associated with depressive symptoms.

nitrazepam: approved small molecule (44 associated side effects) Used to treat short-term sleeping problems (insomnia), such as difficulty falling asleep, frequent awakenings during the night, and early-morning awakening.

798 known side effects mediated through drugs targeting this protein:

Abdominal discomfort Abdominal distension Abdominal pain  
 Abdominal tenderness Abnormal dreams Abnormal faeces  
 Abscess Accommodation disorder Acidosis Acne Acute  
 coronary syndrome Affect lability Ageusia Aggression Agitation  
 Agranulocytosis Akathisia Akinesia Alanine  
 aminotransferase increased Albuminuria Alcohol intolerance  
 Alcohol poisoning Alopecia Altered state of consciousness  
 Amblyopia Amenorrhoea Ammonia increased Amnesia Anaemia  
 Anaemia macrocytic Anaemia megaloblastic Analgesic therapy  
 Anaphylactic shock Anaphylactoid reaction Anger Angina  
 pectoris Angioedema Angiopathy Angle closure glaucoma Anorectal  
 discomfort Anorectal disorder Anterograde amnesia Anuria  
 Anxiety Aortic dissection Apathy Aphasia Aphonia  
 Aphthous stomatitis Aplasia Aplastic anaemia Apnoea  
 Appetite disorder Apraxia Arrhythmia Arrhythmia  
 supraventricular Arterial spasm Arteritis Arthralgia Arthritis  
 Arthropathy Aspartate aminotransferase increased Asphyxia  
 Aspiration Asthenia Asthenopia Asthma Ataxia  
 Athetosis Atrial fibrillation Atrioventricular block  
 Atrioventricular block complete Atrioventricular block  
 second degree Autonomic neuropathy Back pain Balance disorder  
 Basal cell carcinoma Biliary colic Binge eating  
 Bipolar I disorder Bipolar disorder Bladder disorder  
 Bladder dysfunction Bladder pain Blepharitis Blindness  
 Blindness transient Blister Blood alkaline phosphatase  
 increased Blood bilirubin increased Blood creatinine increased  
 Blood disorder Blood glucose decreased Blood pressure  
 increased Blood thromboplastin decreased Blood urea increased  
 Blood uric acid increased Body temperature decreased Body  
 temperature increased Bone disorder Bone pain Borderline  
 personality disorder Bradycardia Bradyphrenia Brain oedema  
 Breast discharge Breast disorder female Breast engorgement  
 Breast enlargement Breast feeding Breast neoplasm

Breast pain Breast swelling Breath holding Breath odour  
 Bronchitis Bronchospasm Bruxism Bulimia nervosa  
 Bundle branch block Burning sensation Bursitis Candidiasis  
 Carbon dioxide increased Cardiac arrest Cardiac disorder  
 Cardiac failure Cardiac fibrillation Cardio-respiratory  
 arrest Cardiovascular disorder Cataract Cellulitis  
 Cerebellar syndrome Cerebral ischaemia Cerebrovascular  
 accident Cerebrovascular disorder Cheilitis Chest discomfort  
 Chest pain Chills Chloasma Choking sensation  
 Cholelithiasis Cholestasis Chorea Chromaturia Clonic  
 convulsion Clonus Clumsiness Coagulopathy Cognitive  
 disorder Colitis Collagen disorder Colour blindness Coma  
 Completed suicide Confusional state Congenital eye disorder  
 Congenital skin disorder Conjunctival hyperaemia  
 Conjunctivitis Connective tissue disorder Constipation  
 Conversion disorder Convulsion Coordination abnormal  
 Corneal erosion Cough Cranial nerve paralysis Crying  
 Cyanosis Cystitis Cystitis noninfective Cytolytic  
 hepatitis Deafness Death Decreased appetite Deep vein  
 thrombosis Dehydration Delirium Delirium tremens Delusion  
 Dementia Dental caries Dependence Depersonalisation  
 Depressed level of consciousness Depressed mood Depression  
 Depressive symptom Derealisation Dermatitis Dermatitis  
 bullous Dermatitis contact Dermatitis exfoliative Diabetes  
 mellitus Diabetic neuropathy Diarrhoea Diplopia Discomfort  
 Disinhibition Disorientation Dissociation Disturbance  
 in attention Disturbance in sexual arousal Dizziness  
 Dizziness postural Drooling Drug abuse Drug  
 administration error Drug dependence Drug eruption Drug  
 hypersensitivity Drug interaction Drug intolerance Drug withdrawal  
 convulsions Drug withdrawal syndrome Dry eye Dry mouth Dry  
 skin Dry throat Duodenal ulcer Dysaesthesia Dysarthria  
 Dysgeusia Dyskinesia Dysmenorrhoea Dyspepsia Dysphagia  
 Dysphonia Dysphoria Dyspnoea Dysthymic disorder  
 Dystonia Dysuria Ear infection Ear pain Ecchymosis  
 Eczema Effusion Ejaculation delayed Ejaculation  
 disorder Ejaculation failure Elderly Electrocardiogram QT  
 prolonged Electrocardiogram T wave inversion Electrocardiogram  
 abnormal Electroencephalogram abnormal Embolism Emotional  
 disorder Emotional distress Emotional poverty Encephalopathy  
 Encopresis Endocrine disorder Endometrial sarcoma  
 Energy increased Enteritis Enterocolitis Enuresis  
 Eosinophilia Epidermodysplasia verruciformis Epilepsy  
 Epistaxis Erectile dysfunction Eructation Erythema  
 Erythema multiforme Euphoric mood Expressive language  
 disorder Extrapyrarnidal disorder Extrasystoles Eye  
 disorder Eye haemorrhage Eye inflammation Eye irritation Eye  
 movement disorder Eye pain Eye swelling Eyelid oedema  
 Eyelid ptosis Face oedema Faecal incontinence Fatigue  
 Fear Feeling abnormal Feeling cold Feeling drunk  
 Feeling hot Feeling jittery Feeling of body temperature change  
 Fibroadenoma of breast Flat affect Flatulence Floppy infant  
 Fluid retention Flushing Foetor hepaticus Folliculitis  
 Frequent bowel movements Fungal infection Furuncle Gait  
 disturbance Galactorrhoea Gallbladder disorder Gangrene

Gastric disorder Gastric ulcer Gastritis Gastroenteritis  
 Gastrointestinal disorder Gastrointestinal haemorrhage  
 Gastrointestinal pain Gastroesophageal reflux disease  
 Generalised oedema Genital candidiasis Genital discharge  
 Gingival bleedingGingival hyperplasia Gingival pain  
 Gingivitis Glaucoma Glossitis Glossodynia Glycosuria  
 Goitre Gout Grand mal convulsion Gynaecomastia  
 Haematoma Haematuria Haemoglobin Haemoglobin decreased  
 Haemoglobinaemia Haemoptysis Haemorrhage Haemorrhage urinary  
 tract Haemorrhoids Hair texture abnormal Hallucination  
 Hangover Headache Hearing impaired Heart rate irregular  
 Hemiparesis Hepatic enzyme increased Hepatic failure  
 Hepatic function abnormal Hepatic necrosis Hepatitis  
 Hepatobiliary disease Hepatocellular injury Hepatomegaly  
 Hernia Herpes simplex Herpes virus infection Herpes  
 zoster Hiccups Hirsutism Homicidal ideation Hordeolum  
 Hormone level abnormal Hostility Hot flush Hunger  
 Hyperacusis Hyperaemia Hyperaesthesia Hyperammonaemia  
 Hyperbilirubinaemia Hypercapnia Hyperchloraemia  
 Hypercholesterolaemia Hyperglycaemia Hyperhidrosis  
 Hyperkalaemia Hyperkinesia Hyperlipidaemia  
 Hypernatraemia Hyperplasia Hyperprolactinaemia  
 Hyperpyrexia Hyperreflexia Hypersensitivity Hypersomnia  
 Hypertension Hyperthermia malignant Hypertonia  
 Hypertrichosis Hypertrophy Hyperuricaemia Hyperventilation  
 Hypoaesthesia Hypocalcaemia Hypocapnia  
 Hypocholesterolaemia Hypochromic anaemia Hypoglycaemia  
 Hypohidrosis Hypokalaemia Hypokinesia Hypomania  
 Hyponatraemia Hypophosphataemia Hypopnoea Hyporeflexia  
 Hypotension Hypothermia Hypothyroidism Hypotonia  
 Hypoventilation Hypoxia Ileus paralytic Ill-defined  
 disorder Illusion Inappropriate antidiuretic hormone secretion  
 Incontinence Increased appetite Increased bronchial  
 secretion Induration Infarction Infection Infectious  
 mononucleosis Infestation Inflammation Influenza Influenza  
 like illness Injection site pain Injection site reaction  
 Insomnia Intestinal obstruction Intraocular pressure  
 increased Iritis Irritability Ischaemia Jaundice Joint  
 swelling Keratitis Ketosis Laboratory test abnormal  
 Labyrinthitis Lacrimal disorderLacrimation increased  
 Lactose intolerance Laryngitis Laryngospasm Lethargy  
 Leukocytosis Leukopenia Libido decreased Libido increased  
 Liver disorder Liver function test abnormal Liver injury  
 Local reaction Logorrhoea Loss of consciousness Loss of  
 libido Lower respiratory tract infection Lung disorder  
 Lymphadenitis Lymphadenopathy Lymphocytosis Lymphopenia  
 Maculopathy Major depression Malaise Malignant hypertension  
 Mania Mastitis Mean arterial pressure Mediastinal disorder  
 Melaena Melanosis Memory impairment Meningitis Menopausal  
 symptoms Menopause Menorrhagia Menstrual disorder  
 Menstruation delayed Menstruation irregular Mental disability  
 Mental disorder Mental retardation Metabolic acidosis  
 Metrorrhagia Micturition urgency Migraine Miosis  
 Mood swings Motion sickness Mouth ulceration Movement disorder  
 Muscle contractions involuntary Muscle relaxant therapy

Muscle rigidity Muscle spasms Muscle spasticityMuscle  
 twitching Muscular weaknessMusculoskeletal discomfort  
 Musculoskeletal disorder Musculoskeletal pain  
 Musculoskeletal stiffness Myalgia Mycobacterium avium  
 complex infectionMycobacterium test Mydriasis Myocardial  
 infarction Myocardial ischaemia Myoclonus Myopathy Myopia  
 Myositis Nail disorder Nasal congestion Nasopharyngitis  
 Nausea Neck pain Necrosis Neoplasm Neoplasm  
 malignant Nephritis Nephrolithiasis Nervous system disorder  
 Nervousness Neuralgia Neuritis Neuroleptic malignant  
 syndrome Neuropathy peripheral Neurosis Neutropenia Nightmare  
 Nocturia Nodal arrhythmia Nodal rhythm Nodule  
 Nuchal rigidity Nystagmus Obesity Obstruction Obstructive  
 airways disorder Ocular hyperaemiaOedema Oedema peripheral  
 Oesophageal achalasia Oesophageal spasmOesophagitis  
 Oliguria Oropharyngeal pain Orthostatic hypotension  
 Osteoarthritis Osteoarthropathy Osteomalacia  
 Osteoporosis Otitis externa Otitis media Pain Pain  
 in extremity Pain in jawPallor Palpitations  
 Pancreatitis Pancreatitis acute Pancytopenia Panic  
 attack Panic disorder Panic reaction Paraesthesia  
 Paraesthesia oralParalysis Paranoia Paresis Parosmia  
 Parotid gland enlargement Pelvic painPemphigus Penile  
 discharge Peptic ulcer Pericardial effusion Periorbital  
 oedema Personality disorder Petechiae Phaeochromocytoma  
 Pharyngitis Phlebitis Phobia Photophobia Photopsia  
 Photosensitivity reaction Pigmentation disorder Platelet  
 count decreased Pleural disorder Pleural effusion Pleurisy  
 Pneumonia Pneumothorax Pollakiuria Polycythaemia  
 Polyuria Post-traumatic stress disorder Precocious  
 puberty Premature ejaculation Premenstrual syndrome Presyncope  
 Procedural nauseaProcedural pain Proctalgia Proctitis  
 Prostatic disorder Prothrombin level increased Pruritus  
 Psoriasis Psychiatric symptom Psychomotor retardation  
 Psychotic disorder Puberty Pulmonary congestion  
 Pulmonary embolism Pulmonary function test decreased  
 Pulmonary haemorrhage Pulmonary hypertension Pulmonary oedema  
 Purpura Purpura non-thrombocytopenic Pyelonephritis Rash  
 Rash erythematousRash maculo-papular Rash pustular  
 Rectal haemorrhage Rectal tenesmus Red blood cell  
 sedimentation rate increasedRenal failure acute Renal pain Renal  
 tubular acidosis Renal tubular disorder Respiratory arrest  
 Respiratory depression Respiratory disorder Respiratory  
 distress Respiratory failure Respiratory moniliasis Respiratory  
 rate decreased Respiratory tract congestion Respiratory tract  
 infection Restless legs syndrome Retching Retinal detachment  
 Retrograde amnesia Rhabdomyolysis Rhinitis Rhinitis  
 allergic Rhinorrhoea Rhonchi Road traffic accident Saliva  
 altered Salivary hypersecretion Sciatica Scleritis  
 Scotoma Seborrhoeic dermatitis Sedation Sensation of  
 heaviness Sensory disturbance Sensory loss Sexual  
 dysfunction Shock Sinus bradycardiaSinus tachycardiaSinusitis Skin  
 burning sensationSkin discolouration Skin disorder Skin  
 exfoliationSkin hypertrophy Skin necrosis Skin odour abnormal  
 Skin wrinkling Sleep apnoea syndrome Sleep disorder Sleep



talking Sluggishness Sneezing Snoring Somnambulism  
 Somnolence Speech disorder Sputum increased Stevens-Johnson  
 syndrome Stomatitis Strabismus Stress Stridor Stupor  
 Substance abuse Sudden death Suicidal behaviour  
 Suicidal ideation Suicide attempt Supraventricular  
 extrasystoles Swelling Swelling face Swollen tongue  
 Syncope Synovial cyst Tachyarrhythmia Tachycardia  
 Tachypnoea Tardive dyskinesia Temperature intolerance  
 Tenderness Tendonitis Tenosynovitis Tension Testicular  
 disorder Testicular swelling Tetany Therapeutic response  
 decreased Thinking abnormal Thirst Throat irritation  
 Thrombocytopenia Thrombocytopenic purpura Thrombocytosis  
 Thrombophlebitis Thrombosis Thyroid disorder Thyroid neoplasm  
 Tinnitus Tongue coated Tongue discolouration Tongue  
 disorder Tongue oedema Tongue paralysis Tooth disorder  
 Toothache Torsade de pointes Toxic epidermal necrolysis  
 Transaminases increased Tremor Trismus Tropical  
 spastic paresis Tubulointerstitial nephritis Ulcer Ulcerative  
 keratitis Unintended pregnancy Upper airway obstruction Upper  
 motor neurone lesion Upper respiratory tract infection Urethral  
 disorder Urethritis Urinary hesitance Urinary incontinence  
 Urinary retention Urinary tract disorder Urinary tract  
 infection Urine abnormality Urine analysis abnormal Urine  
 colour abnormal Urine output increased Urticaria Uterine  
 haemorrhage Uterovaginal prolapse VIIth nerve paralysis Vaginal  
 discharge Vaginal haemorrhage Vaginal infection Vaginal  
 inflammation Varicose vein Vascular purpura Vasculitis  
 Vasodilation procedure Vasospasm Vein pain Venous thrombosis  
 Ventricular arrhythmia Ventricular extrasystoles Ventricular  
 failure Ventricular fibrillation Ventricular hypokinesia  
 Ventricular tachycardia Vertigo Vestibular disorder  
 Viral infection Vision blurred Visual acuity reduced  
 Visual impairment Vomiting Vulvovaginal disorder Weight  
 decreased Weight increased Wheezing Withdrawal syndrome  
 Xeroderma Xerophthalmia Yawning

\*\*\*\*\*  
 \*\*\*\*\*

Toll-like receptor 8 - Group: Receptor

Treated with:

imiquimod: approved small molecule (146 associated side  
 effects) For the topical treatment of clinically typical,  
 nonhyperkeratotic, nonhypertrophic actinic keratoses on the face or  
 scalp in immunocompetent adults. Also indicated for the treatment of  
 external genital and perianal warts/condyloma acuminata in  
 individuals 12 years old and above.

146 known side effects mediated through drugs targeting this protein:

Abdominal pain Acute coronary syndrome Agitation Alopecia  
 Angioedema Anxiety Application site reaction Arrhythmia  
 Arthralgia Arthritis Asthenia Atrial fibrillation Back  
 pain Body temperature increased Bone pain Bronchitis Capillary  
 leak syndrome Cardiac failure Cardiac fibrillation  
 Cardiomyopathy Cardiovascular disorder Cellulitis  
 Cerebrovascular accident Cheilitis Chest pain Chills

Completed suicide Congenital eye disorder Conjunctivitis  
Convulsion Cough Crying Cyst Decreased appetite  
Dermatitis Dermatitis exfoliative Diarrhoea Dizziness  
Dyspepsia Dyspnoea Dysuria Eczema Erythema  
Erythema multiforme Eye disorder Eye infection  
Fatigue Febrile convulsion Fungal infection  
Gastrointestinal disorder Gastrointestinal pain  
Gastrooesophageal reflux disease Gout Haemoglobin Haemorrhage  
Headache Hepatic function abnormal Hernia Herpes  
simplex Herpes virus infection Herpes zoster  
Hypercholesterolaemia Hyperkeratosis Hypersensitivity  
Hypertension Hypertrophic scar Hypertrophy Idiopathic  
thrombocytopenic purpura Induration Infarction Infection  
Infestation Influenza like illness Insomnia Ischaemia  
Lethargy Leukoderma Local reaction Loss of consciousness  
Lymphadenopathy Lymphoma Malaise Mental disorder  
Multiple sclerosis Musculoskeletal discomfort Myalgia  
Myocardial infarction Nausea Nervous system disorder  
Neuropathy peripheral Oedema Oral herpes Osteoarthropathy  
Pain Palpitations Pancytopenia Papule  
Paraesthesia Paresis Pharyngitis Photosensitivity  
reaction Protein urine present Proteinuria Pruritus Pulmonary  
congestion Pulmonary oedema Purpura Rash Respiratory disorder  
Respiratory tract congestion Rhinitis Scab Scar Scrotal  
erythema Scrotal oedema Scrotal pain Scrotal ulcer  
Sensitisation Shock Sinusitis Skin disorder Skin  
exfoliation Skin hyperpigmentation Squamous cell carcinoma  
Supraventricular tachycardia Swelling Syncope Tachycardia  
Tearfulness Tenderness Thrombocytopenic purpura Thyroiditis  
Tinea cruris Tinea infection Tooth disorder Ulcer Upper  
respiratory tract infection Urethral disorder Urinary retention  
Urinary tract disorder Urinary tract infection Vaginal  
infection Vaginal inflammation Vaginitis bacterial Vascular  
purpura Vomiting

\*\*\*\*\*  
\*\*\*\*\*

D(1B) dopamine receptor - Group: Receptor

Treated with:

ziprasidone: approved small molecule (251 associated side effects) For the treatment of schizophrenia and related psychotic disorders.

cabergoline: approved small molecule (96 associated side effects) For the treatment of hyperprolactinemic disorders, either idiopathic or due to prolactinoma (prolactin-secreting adenomas). May also be used to manage symptoms of Parkinsonian Syndrome as monotherapy during initial symptomatic management or as an adjunct to levodopa therapy during advanced stages of disease.

ropinirole: approved small molecule (631 associated side effects) For the treatment of the signs and symptoms of idiopathic Parkinson's disease. Also used for the treatment of restless legs syndrome.

olanzapine: approved small molecule (393 associated side effects) For the acute and maintenance treatment of schizophrenia and related psychotic disorders, as well as acute treatment of manic

or mixed episodes of bipolar 1 disorder. Intramuscular olanzapine is indicated for the rapid control of agitated patients.

pramipexole: approved small molecule (620 associated side effects) For the treatment of signs and symptoms of idiopathic Parkinson's disease

lisuride: approved small molecule (0 associated side effects) For the management of Parkinson's Disease

apomorphine: approved small molecule (45 associated side effects) For the acute, intermittent treatment of hypomobility, off episodes (end-of-dose wearing off and unpredictable on/off episodes) associated with advanced Parkinson's disease.

fenoldopam: approved small molecule (51 associated side effects) For the in-hospital, short-term (up to 48 hours) management of severe hypertension when rapid, but quickly reversible, emergency reduction of blood pressure is clinically indicated, including malignant hypertension with deteriorating end-organ function.

dopamine: approved small molecule (23 associated side effects) For the correction of hemodynamic imbalances present in the shock syndrome due to myocardial infarction, trauma, endotoxic septicemia, open-heart surgery, renal failure, and chronic cardiac decompensation as in congestive failure

carphenazine: approved small molecule (0 associated side effects) Used in the treatment of acute or chronic schizophrenic reactions in hospitalized patients.

pergolide: approved, withdrawn small molecule (354 associated side effects) Indicated as adjunctive treatment to levodopa/carbidopa in the management of the signs and symptoms of Parkinson's disease. It was withdrawn from the US and Canadian markets in 2007 due to an increased risk of cardiac valvulopathy.

bromocriptine: approved small molecule (120 associated side effects) For the treatment of galactorrhea due to hyperprolactinemia, prolactin-dependent menstrual disorders and infertility, prolactin-secreting adenomas, prolactin-dependent male hypogonadism, as adjunct therapy to surgery or radiotherapy for acromegaly or as monotherapy in special cases, as monotherapy in early Parkinsonian Syndrome or as an adjunct with levodopa in advanced cases with motor complications. Bromocriptine has also been used off-label to treat restless legs syndrome and neuroleptic malignant syndrome.

quetiapine: approved small molecule (359 associated side effects) For the treatment of schizophrenia and related psychotic disorders.

aripiprazole: approved small molecule (630 associated side effects) For the treatment of schizophrenia and related psychotic disorders.

methotrimeprazine: approved small molecule (0 associated side effects) For the treatment of psychosis, particular those of schizophrenia, and manic phases of bipolar disorder.

zuclopenthixol: approved small molecule (0 associated side effects) For the management of the manifestations of schizophrenia.

rotigotine: approved small molecule (93 associated side effects) For use/treatment in neurologic disorders and parkinson's disease as well as moderate-to-severe primary Restless Legs Syndrome.

1167 known side effects mediated through drugs targeting this protein:

Abasia Abdominal adhesions Abdominal discomfort Abdominal distension Abdominal neoplasm Abdominal pain Abdominal pain lower Abdominal pain upper Abdominal tenderness Abnormal behaviour Abnormal dreams Abscess Accommodation disorder Acidosis Acne Actinic keratosis Acute abdomen Acute coronary syndrome Acute lymphocytic leukaemia Acute psychosis Acute tonsillitis Adenocarcinoma Adenoma benign Adhesion Affect lability Ageusia Aggression Agitation Agoraphobia Agranulocytosis Akathisia Akinesia Alanine aminotransferase increased Albright's disease Albuminuria Alcohol intolerance Alkalosis Alopecia Altered state of consciousness Amaurosis fugax Amblyopia Amenorrhoea Amnesia Anaemia Anaemia macrocytic Anaemia megaloblastic Anaphylactic shock Anaphylactoid reaction Aneurysm Anger Angina pectoris Angina unstable Angioedema Angiomyolipoma Angiopathy Anorectal discomfort Anorectal disorder Anorgasmia Antisocial behaviour Antisocial personality disorder Anxiety Aortic dissection Apathy Aphasia Aphthous stomatitis Apnoea Appendicitis Application site reaction Arrhythmia Arrhythmia supraventricular Arterial disorder Arterial occlusive disease Arterial stenosis Arteriosclerosis Arteritis Arthralgia Arthritis Arthropathy Ascites Asocial behaviour Aspartate aminotransferase increased Asphyxia Aspiration Asthenia Asthma Ataxia Atelectasis Atrial fibrillation Atrial flutter Atrial septal defect Atrioventricular block first degree Atrioventricular block second degree Atrophy Aura Azotaemia Back pain Bacterial infection Balance disorder Balanoposthitis Basal cell carcinoma Basophilia Benign intracranial hypertension Benign neoplasm Benign neoplasm of skin Benign prostatic hyperplasia Biliary colic Binge eating Bladder cancer Bladder disorder Bladder pain Blepharitis Blepharospasm Blindness Blindness transient Blister Blood alkaline phosphatase increased Blood amylase increased Blood bilirubin increased Blood cholesterol increased Blood creatine phosphokinase increased Blood creatinine increased Blood disorder Blood electrolytes abnormal Blood glucose decreased Blood glucose increased Blood insulin increased Blood iron decreased Blood lactate dehydrogenase increased Blood phosphorus increased Blood potassium decreased Blood potassium increased Blood pressure abnormal Blood pressure diastolic decreased Blood pressure fluctuation Blood pressure increased Blood pressure systolic decreased Blood prolactin increased Blood triglycerides increased Blood triglycerides normal Blood urea increased Blood uric acid increased Blood urine Blood urine present Blunted affect Body temperature decreased Body temperature increased Bone disorder Bone pain Bone sarcoma Bradycardia Bradykinesia Bradyphrenia Brain neoplasm Brain neoplasm benign Brain oedema Breast cancer Breast cyst Breast disorder Breast disorder female Breast engorgement Breast enlargement Breast feeding Breast neoplasm Breast pain Breath odour

Bronchiolitis      Bronchitis      Bronchopneumonia  
 Bronchopneumopathy      Bruxism      Buccoglossal syndrome  
 Bulimia nervosa      Bundle branch block      Burning sensation  
 Bursitis      Cachexia      Calculus bladder      Calculus urinary  
 Candidiasis      Carbohydrate tolerance decreased      Cardiac arrest  
 Cardiac disorder      Cardiac failure      Cardiac failure congestive  
 Cardiac fibrillation      Cardiac flutter      Cardiac murmur  
 Cardiac septal defect      Cardiac valve disease      Cardio-  
 respiratory arrest      Cardiomegaly      Cardiomyopathy  
 Cardiopulmonary failure      Cardiovascular disorder  
 Carotid artery occlusion      Carpal tunnel syndrome      Cataract  
 Catatonia      Cells in urine      Cellulitis      Cerebral artery  
 embolism      Cerebral atrophy      Cerebral haemorrhage      Cerebral  
 infarction      Cerebral ischaemia      Cerebrospinal fluid rhinorrhoea  
 Cerebrovascular accident      Cervicitis      Cervix carcinoma  
 Chapped lips      Cheilitis      Chest discomfort      Chest pain  
 Chills      Choking      Cholecystitis      Cholecystitis chronic  
 Cholelithiasis      Chorea      Choreoathetosis      Chromaturia  
 Chronic lymphocytic leukaemia      Chronic obstructive  
 pulmonary disease      Coccydynia      Cognitive disorder      Cogwheel rigidity  
 Cold sweat      Colitis      Colitis ulcerative      Colon cancer  
 Colorectal cancer      Coma      Completed suicide      Compulsions      Condition  
 aggravated      Conduction disorder      Confusional state      Congenital  
 anomaly      Congenital eye disorder      Congenital foot malformation  
 Congenital genitourinary abnormality      Conjunctival  
 haemorrhage      Conjunctivitis      Connective tissue disorder  
 Constipation      Convulsion      Coordination abnormal      Corneal  
 lesion      Coronary artery disease      Coronary artery occlusion  
 Costochondritis      Cough      Crocodile tears syndrome      Cyanosis  
 Cystitis      Cystitis noninfective      Cytolytic hepatitis  
 Deafness      Death      Decreased appetite      Decubitus ulcer      Deep  
 vein thrombosis      Deficiency anaemia      Dehydration      Delirium  
 Delusion      Dementia      Dental caries      Dependence  
 Depersonalisation      Depressed level of consciousness      Depressed  
 mood      Depression      Depressive symptom      Derealisation      Dermal cyst  
 Dermatitis atopic      Dermatitis bullous      Dermatitis contact  
 Dermatitis exfoliative      Dermatitis infected      Dermoid cyst  
 Developmental delay      Diabetes mellitus      Diabetic coma  
 Diabetic hyperglycaemic coma      Diabetic ketoacidosis  
 Diaphragmatic hernia      Diarrhoea      Diplopia      Discomfort  
 Disorientation      Disseminated intravascular coagulation  
 Dissociation      Disturbance in attention      Disturbance in  
 sexual arousal      Diverticulitis      Dizziness      Dizziness exertional  
 Dizziness postural      Drooling      Drug abuse      Drug dependence  
 Drug eruption      Drug hypersensitivity      Drug ineffective      Drug  
 interaction      Drug level increased      Drug withdrawal syndrome      Dry  
 eye      Dry mouth      Dry skin      Dry throat      Duodenal ulcer      Duodenal  
 ulcer haemorrhage      Duodenitis      Dysarthria      Dysentery      Dysgeusia  
 Dysgraphia      Dyskinesia      Dysmenorrhoea      Dyspepsia      Dysphagia  
 Dysphemia      Dysphonia      Dysphoria      Dyspnoea      Dyspnoea  
 exertional      Dystonia      Dysuria      Ear disorder      Ear infection  
 Ear pain      Ecchymosis      Eclampsia      Eczema      Effusion  
 Ejaculation disorder      Ejaculation failure      Elastosis  
 perforans      Electrocardiogram QRS complex      Electrocardiogram QT  
 prolonged      Electrocardiogram ST segment elevation      Electrocardiogram

T wave inversion Electrocardiogram abnormal Electrocardiogram  
change Electrolyte imbalance Embolism Emotional distress  
Emphysema Encephalopathy Endocrine disorder Endometrial  
cancer Endometrial neoplasm Energy increased Enteritis  
Enuresis Enzyme abnormality Eosinophilia  
Epicondylitis Epididymitis Epilepsy Epistaxis  
Erectile dysfunction Eructation Erythema Erythema  
multiforme Erythromelalgia Euphoric mood Exfoliative rash  
Exostosis Extrapyrarnidal disorder Extrasystoles Eye  
discharge Eye disorder Eye haemorrhage Eye infection Eye  
inflammation Eye irritation Eye pain Eyelid function  
disorder Eyelid oedema Eyelid ptosis Face oedema Facial pain  
Facial paresis Faecal incontinence Faecalith Faecaloma  
Faeces hard Fasciitis Fasting Fatigue Fear Feeling  
abnormal Feeling cold Feeling hot Feeling jittery Female  
sexual dysfunction Fibroadenoma of breast Fibrocystic breast  
disease Fibrosis Flank pain Flat affect Flatulence Fluid  
overload Fluid retention Flushing Folliculitis Formication  
Fungal infection Fungal skin infection Furuncle Gait  
disturbance Galactorrhoea Gallbladder cancer Gallbladder  
disorder Gamma-glutamyltransferase increased Gangrene  
Gastric cancer Gastric disorder Gastric haemorrhage  
Gastric pH decreased Gastric polyps Gastric ulcer  
Gastric ulcer haemorrhage Gastritis Gastritis haemorrhagic  
Gastroenteritis Gastrointestinal disorder Gastrointestinal  
haemorrhage Gastrointestinal infection Gastrointestinal neoplasm  
Gastrointestinal pain Gastrointestinal stromal tumour  
Gastrooesophageal reflux disease Generalised oedema  
Genital candidiasis Genital discharge Gestational  
hypertension Gingival bleeding Gingival infection Gingival  
pain Gingivitis Glaucoma Glossitis Glossodynia Glucose tolerance  
decreased Glucose tolerance impaired Glycosuria Glycosylated  
haemoglobin increased Goitre Gout Grand mal convulsion  
Gravitational oedema Groin pain Gynaecomastia Haemangioma  
Haematemesis Haematochezia Haematocrit decreased  
Haematoma Haematuria Haemoglobin Haemoglobin decreased  
Haemoglobin increased Haemolysis Haemoptysis Haemorrhage  
Haemorrhage intracranial Haemorrhoids Haemothorax  
Hallucination Hallucination, auditory Hallucination,  
visual Hangover Head discomfort Headache Hearing impaired  
Heart rate irregular Hemianopia Hemiparesis Hemiplegia  
Hepatic enzyme increased Hepatic failure Hepatic function  
abnormal Hepatic neoplasm malignant Hepatic steatosis Hepatitis  
Hepatobiliary disease Hepatocellular injury Hepatomegaly  
Hereditary disorder Hernia Herpes simplex Herpes  
virus infection Herpes zoster Hiccups Hirsutism Homicidal  
ideation Hordeolum Hormone level abnormal Hostility Hot flush  
Hunger Hydrocephalus Hyperacusis Hyperaemia  
Hyperaesthesia Hyperbilirubinaemia Hyperchloraemia  
Hyperchlorhydria Hypercholesterolaemia Hyperglycaemia  
Hyperhidrosis Hyperinsulinism Hyperkalaemia  
Hyperkeratosis Hyperkinesia Hyperlipidaemia  
Hypernatraemia Hyperparathyroidism Hyperphagia  
Hyperphosphataemia Hyperplasia Hyperreflexia  
Hypersensitivity Hypersexuality Hypersomnia Hypertension

Hypertensive crisis      Hyperthermia      Hyperthyroidism  
 Hypertonia Hypertonic bladder      Hypertriglyceridaemia  
 Hypertrophy Hyperuricaemia      Hyperuricosuria      Hyperventilation  
 Hypoaesthesia      Hypoaesthesia oral      Hypocalcaemia  
 Hypochloroemia      Hypocholesterolaemia      Hypochromic anaemia  
 Hypoglycaemia      Hypogonadism      Hypokalaemia      Hypokinesia  
 Hypomagnesaemia      Hypomania      Hypomenorrhoea      Hyponatraemia  
 Hypophagia Hypoproteinaemia Hyporeflexia      Hypotension  
 Hypothermia Hypothyroidism      Hypotonia      Hypoventilation  
 Hypovitaminosis      Hypoxia      Idiopathic thrombocytopenic  
 purpura      Ileus Ill-defined disorder      Illusion      Immune system  
 disorder      Impaired healing Inappropriate antidiuretic hormone  
 secretion      Incontinence      Increased appetite      Induration  
 Infarction Infected cyst      Infection      Infestation  
 Inflammation      Influenza      Inguinal hernia      Initial insomnia  
 Injection site mass      Injection site pain      Injection site  
 reaction      Inner ear disorder      Insomnia      Intention tremor  
 Intentional self-injury      Interstitial lung disease  
 Intervertebral disc degeneration      Intervertebral disc disorder  
 Intervertebral disc protrusion      Intervertebral discitis  
 Intestinal functional disorder      Intestinal obstruction  
 Intestinal perforation Intracranial pressure increased      Iron  
 deficiency Iron deficiency anaemia      Irritability      Irritable  
 bowel syndrome      Ischaemia      Ischaemic hepatitis      Ischaemic stroke  
 Jaundice      Jaundice cholestatic      Joint contracture Joint  
 effusion      Joint range of motion decreased      Joint stiffness      Joint  
 swelling      Judgement impaired      Keratitis      Keratoconjunctivitis  
 sicca Ketoacidosis      Ketosis      Laboratory test abnormal  
 Lacrimal disorder Lacrimation increased      Lactose intolerance  
 Laryngeal cancer Laryngeal disorder      Laryngeal neoplasm  
 Laryngeal oedema Laryngitis Laryngospasm      Left ventricular  
 failure      Leiomyoma      Lens disorder      Lenticular opacities  
 Lenticular pigmentation      Lethargy      Leukaemia  
 Leukocytosis      Leukoderma Leukopenia Leukoplakia oral  
 Libido decreased Libido increased Lichenoid keratosis      Lip  
 and/or oral cavity cancer      Lip dry      Lipoma      Livedo  
 reticularis Liver disorder      Liver function test abnormal Liver  
 injury      Lividity      Lobar pneumonia      Localised infection  
 Localised oedema Logorrhoea Loss of consciousness      Loss of  
 libido      Lower respiratory tract infection Lung cancer metastatic  
 Lung disorder      Lung infiltration Lung neoplasm malignant  
 Lymphadenitis      Lymphadenopathy      Lymphatic disorder  
 Lymphocytic leukaemia Lymphocytosis      Lymphoedema Lymphoma  
 Lymphopenia Macular degeneration      Macule      Maculopathy Major  
 depression Malaise      Male sexual dysfunction      Malignant  
 melanoma      Mania Masked facies      Mastitis      Mediastinal disorder  
 Melaena      Melanocytic naevus      Memory impairment Meningitis  
 Menopausal symptoms      Menopause      Menorrhagia Menstrual  
 disorder      Menstruation irregular Mental disability Mental disorder  
 Mental retardation      Mental status changes      Metabolic  
 alkalosis      Metastasis      Metastatic neoplasm      Metrorrhagia  
 Micturition disorder      Micturition urgency      Middle ear  
 disorder      Middle ear effusion      Middle insomnia      Migraine with  
 aura      Migraine without aura      Miosis      Mitral valve incompetence  
 Mobility decreased      Monarthrititis      Monocytosis Mood swings

Motion sickness Mouth ulceration Movement disorder Multiple  
 myeloma Muscle atrophy Muscle contractions involuntary  
 Muscle contracture Muscle enzyme increased Muscle  
 relaxant therapy Muscle rigidity Muscle spasms Muscle tightness  
 Muscle twitching Muscular weakness Musculoskeletal chest pain  
 Musculoskeletal discomfort Musculoskeletal pain  
 Musculoskeletal stiffness Myalgia Mydriasis Myelitis  
 Myocardial infarction Myocardial ischaemia Myocarditis  
 Myoclonus Myopathy Myopia Myositis Nail disorder  
 Nail infection Narcolepsy Nasal congestion Nasal disorder  
 Nasal dryness Nasal polyps Nasopharyngitis Nausea  
 Neck pain Necrosis Necrosis ischaemic Neoplasm  
 malignant Neoplasm prostate Neoplasm recurrence Neoplasm skin  
 Nephritis Nephrolithiasis Nephrotic syndrome Nerve root  
 lesion Nervous system disorder Nervousness Neuralgia  
 Neuritis Neurodermatitis Neurogenic bladder Neuroleptic  
 malignant syndrome Neurological symptom Neuroma Neuropathy  
 peripheral Neurosis Neutropenia Neutrophil count decreased  
 Neutrophil count increased Night sweats Nightmare  
 Nocturia Nodal arrhythmia Nodule Normochromic  
 normocytic anaemia Nuchal rigidity Nystagmus Obesity  
 Obsessive thoughts Obstruction Obstructive airways disorder  
 Ocular hyperaemia Oculogyric crisis Oedema Oedema peripheral  
 Oesophageal carcinoma Oesophageal disorder Oesophageal spasm  
 Oesophageal stenosis Oesophageal ulcer Oesophagitis  
 Oliguria Onychomycosis Opisthotonus Oral candidiasis  
 Oral neoplasm benign Oral pain Orchitis noninfective  
 Oropharyngeal discomfort Oropharyngeal pain  
 Oropharyngeal spasm Orthostatic hypotension  
 Osteoarthritis Osteomyelitis Osteonecrosis Osteopenia  
 Osteoporosis Otitis externa Otitis media Ovarian  
 cancer Ovarian cyst Pain Pain in extremity Pain in jaw  
 Pallor Palpitations Pancreatitis acute Panic  
 attack Panic disorder Panic disorder with agoraphobia Panic  
 reaction Papilloma Paraesthesia oral Paralysis Paranoia  
 Parasomnia Paresis Parkinsonian gait Parkinsonism  
 Paronychia Parosmia Pathological fracture Pathological  
 gambling Pelvic pain Penis disorder Peptic ulcer Pericardial  
 effusion Pericarditis constrictive Perineal pain  
 Periodontitis Periorbital oedema Peripheral coldness  
 Peripheral ischaemia Peripheral vascular disorder Peritoneal  
 adhesions Personality disorder Petechiae Pharyngeal erythema  
 Pharyngitis Phlebitis Phlebitis superficial Phobia  
 Phonological disorder Photophobia Photopsia Photosensitivity  
 allergic reaction Photosensitivity reaction Piloerection  
 Plasmacytoma Platelet count decreased Pleural disorder  
 Pleural effusion Pleural fibrosis Pleurisy Pneumonia  
 Pneumonia aspiration Pneumothorax Poisoning  
 Poliomyelitis Pollakiuria Polyarteritis nodosa  
 Polycythaemia Polydipsia Polymyalgia rheumatica Polyp  
 Polyuria Post procedural infection Postmenopausal  
 haemorrhage Pre-eclampsia Premature ejaculation Premenstrual  
 syndrome Presyncope Priapism Proctalgia Productive cough  
 Prolactinoma Prostate cancer Prostatic adenoma Prostatic  
 disorder Prostatitis Protein urine present Proteinuria Protrusion



tongue Prurigo Pruritus Pruritus genital Pseudolymphoma  
 Psoriasis Psychiatric symptom Psychomotor retardation  
 Psychotic disorder Pulmonary congestion Pulmonary  
 embolism Pulmonary fibrosis Pulmonary hypertension Pulmonary  
 oedema Purpura Pyelonephritis Pyoderma Pyuria Rash  
 erythematous Rash maculo-papular Rash papular Rash  
 pustular Rash vesicular Raynaud's phenomenon Rectal cancer  
 Rectal haemorrhage Rectal tenesmus Red blood cell count  
 decreased Reflux oesophagitis Regressive behaviour  
 Regurgitation Renal artery stenosis Renal colic Renal cyst  
 Renal failure acute Renal impairment Renal neoplasm Renal  
 pain Respiratory alkalosis Respiratory arrest Respiratory  
 disorder Respiratory distress Respiratory failure Respiratory  
 tract congestion Respiratory tract infection Respiratory tract  
 infection viral Restless legs syndrome Retching Retinal  
 detachment Retinal disorder Retinal vascular disorder Retinitis  
 pigmentosa Retroperitoneal fibrosis Rhabdomyolysis Rheumatoid  
 arthritis Rhinitis Rhinitis allergic Rhinitis seasonal Rhinorrhoea  
 Rhonchi Rosacea Rotator cuff syndrome Sacroiliitis  
 Saliva altered Salivary duct obstruction Salivary gland  
 enlargement Salivary hypersecretion Salpingitis Sarcoma Scab  
 Schizoaffective disorder Schizophreniform disorder  
 Sciatica Scotoma Seasonal allergy Seborrhoeic dermatitis  
 Seborrhoeic keratosis Sedation Sensation of heaviness  
 Sensory disturbance Sensory loss Sepsis Septic  
 shock Sexual dysfunction Shock Sialoadenitis Sicca syndrome  
 Sick sinus syndrome Sinus arrhythmia Sinus bradycardia Sinus  
 congestion Sinus disorder Sinus headache Sinus tachycardia  
 Sinusitis Skin burning sensation Skin cancer Skin  
 discolouration Skin disorder Skin exfoliation Skin  
 hyperpigmentation Skin hypertrophy Skin infection Skin irritation  
 Skin lesion Skin mass Skin odour abnormal Skin papilloma  
 Skin ulcer Sleep apnoea syndrome Sleep attacks Sleep  
 disorder Sleep talking Sluggishness Sneezing Snoring  
 Social avoidant behaviour Somnambulism Somnolence  
 Speech disorder Spinal osteoarthritis Spine malformation  
 Splenomegaly Spondylitis Squamous cell carcinoma  
 Status epilepticus Stevens-Johnson syndrome Sticky skin  
 Stomatitis Stress Stridor Stupor Subarachnoid  
 haemorrhage Subcutaneous nodule Subdural haematoma Sudden  
 death Suicidal ideation Suicide attempt Superior sagittal sinus  
 thrombosis Supraventricular extrasystoles Supraventricular  
 tachycardia Suspiciousness Swelling Swelling face Swollen  
 tongue Syncope Synovitis Systemic lupus erythematosus  
 Tachycardia Tachypnoea Tardive dyskinesia Tenderness  
 Tendonitis Tenosynovitis Tension Tension headache  
 Terminal insomnia Testicular disorder Testicular pain  
 Therapeutic response decreased Therapeutic response  
 increased Thinking abnormal Thirst Thought blocking Throat  
 irritation Throat tightness Thrombocytopenia Thrombocytopenic  
 purpura Thrombocytosis Thrombophlebitis Thrombosis Thyroid  
 adenoma Thyroid cancer Thyroid neoplasm Thyroiditis Tic  
 Tinnitus Tongue discolouration Tongue disorder Tongue dry  
 Tongue oedema Tongue paralysis Tongue spasm Tongue  
 ulceration Tonsillar hypertrophy Tonsillitis Tooth abscess Tooth

disorder Tooth impacted Tooth infection Toothache Torticollis  
Tracheobronchitis Transaminases increased Transient  
ischaemic attack Tremor Trismus Tuberculin test positive  
Ulcer Ulcer haemorrhage Umbilical hernia Unevaluable event  
Unintended pregnancy Upper respiratory tract infection  
Upper-airway cough syndrome Urethral disorder Urethral pain  
Urethritis Urinary hesitation Urinary incontinence  
Urinary retention Urinary tract disorder Urinary tract  
infection Urine abnormality Urine analysis abnormal Urine  
output increased Urosepsis Urticaria Uterine disorder Uterine  
haemorrhage Uterine leiomyoma Uterine neoplasm Uterovaginal prolapse  
VIIth nerve paralysis Vaginal discharge Vaginal haemorrhage  
Vaginal infection Vaginal inflammation Varicose vein  
Vascular purpura Vasculitis Vasoconstriction Vasodilation  
procedure Vasospasm Vein disorder Venous thrombosis Ventricular  
arrhythmia Ventricular extrasystoles Ventricular failure  
Ventricular fibrillation Ventricular hypertrophy  
Ventricular tachycardia Vertigo Vestibular ataxia  
Vestibular disorder Viral diarrhoea Viral infection  
Vision blurred Visual acuity reduced Visual impairment  
Vitamin B12 deficiency Vitreous detachment Vitreous floaters  
Vocal cord paralysis Vomiting Vulvovaginal candidiasis  
Vulvovaginal mycotic infection Vulvovaginitis Water  
intoxication Weight decreased Weight fluctuation Weight  
increased Wheezing White blood cell count decreased White blood  
cell count increased White blood cells urine positive Withdrawal  
bleed Withdrawal syndrome Wound infection Xerophthalmia  
Xerosis Yawning

\*\*\*\*\*  
\*\*\*\*\*

ALK tyrosine kinase receptor - Group: Enzyme

Treated with:

adenosine triphosphate: approved, nutraceutical small molecule  
(0 associated side effects) For nutritional supplementation,  
also for treating dietary shortage or imbalance

known side effects mediated through drugs targeting this protein:

\*\*\*\*\*  
\*\*\*\*\*

Glucagon receptor - Group: Receptor

Treated with:

glucagon recombinant: approved biotech (0 associated side  
effects) For treatment of severe hypoglycemia, also used in  
gastrointestinal imaging

known side effects mediated through drugs targeting this protein:

\*\*\*\*\*  
\*\*\*\*\*

Sodium channel subunit beta-2 - Group: Channel

Treated with:

zonisamide: approved small molecule (190 associated side  
effects) For use as adjunctive treatment of partial seizures in  
adults with epilepsy.

190 known side effects mediated through drugs targeting this protein:

Abdominal pain Abnormal dreams Acne Agitation Alanine  
aminotransferase increased Albuminuria Alopecia Amblyopia  
Amenorrhoea Anaemia Anxiety Apnoea Arthralgia  
Arthritis Aspartate aminotransferase increased Asthenia  
Ataxia Atrial fibrillation Bladder pain Blood  
lactate dehydrogenase increased Bradycardia Calculus bladder  
Cardiac failure Cardiac fibrillation Cerebrovascular  
accident Chest pain Cholangitis Cholecystitis Cholelithiasis  
Cognitive disorder Colitis Confusional state  
Conjunctivitis Constipation Convulsion Coordination  
abnormal Cough Deafness Decreased appetite Dehydration  
Depressed level of consciousness Dermatitis Dermatitis  
bullous Diarrhoea Diplopia Discomfort Disturbance in sexual  
arousal Dizziness Dry mouth Dry skin Duodenal ulcer  
Duodenitis Dysarthria Dysgeusia Dyskinesia Dyspepsia  
Dysphagia Dyspnoea Dystonia Dysuria Ecchymosis  
Eczema Embolism Encephalopathy Enuresis Erectile  
dysfunction Euphoric mood Extrasystoles Face oedema Faecal  
incontinence Fatigue Feeling abnormal Flank pain Flatulence  
Gait disturbance Gastritis Gastroenteritis Gastrointestinal  
pain Gingival bleeding Gingival hyperplasia Gingivitis Glaucoma  
Glossitis Gynaecomastia Haematemesis Haematuria  
Haemoglobin Haemoptysis Haemorrhage Headache Hirsutism  
Hyperaesthesia Hyperhidrosis Hyperkinesia Hyperplasia  
Hyperreflexia Hypersensitivity Hypertension Hypertonia  
Hypoglycaemia Hypokinesia Hyponatraemia Hypotension  
Hypotonia Ill-defined disorder Immunodeficiency  
Incontinence Influenza Insomnia Iritis  
Irritability Jaundice Jaundice cholestatic Leukopenia  
Libido decreased Loss of consciousness Lymphadenopathy  
Malaise Mastitis Melaena Menorrhagia Microcytic  
anaemia Micturition urgency Mouth ulceration Movement disorder  
Muscle relaxant therapy Muscle rigidity Muscle spasms  
Muscle twitching Muscular weakness Musculoskeletal discomfort  
Musculoskeletal stiffness Myalgia Myoclonus Nausea  
Nervousness Neuritis Neuropathy peripheral Nocturia  
Nuchal rigidity Nystagmus Oculogyric crisis Oedema  
Oedema peripheral Oesophagitis Osteoarthritis Pain  
Palpitations Paraesthesia oral Paralysis Parosmia  
Petechiae Pharyngitis Photophobia Pollakiuria Polyuria  
Pruritus Psychotic disorder Pulmonary embolism Rash  
Rash maculo-papular Rash pustular Rectal haemorrhage  
Rhinitis Scotoma Shock Somnolence Speech disorder  
Stomatitis Syncope Systemic lupus erythematosus Tachycardia  
Tension Thirst Thrombocytopenia Thrombophlebitis  
Tinnitus Tremor Ulcer Urinary incontinence Urinary  
retention Urine output increased Urticaria VIIIth nerve paralysis  
Vascular insufficiency Ventricular extrasystoles Vertigo  
Vomiting Weight decreased Weight increased

\*\*\*\*\*  
\*\*\*\*\*

Histamine H1 receptor - Group: Receptor

Treated with:

benzotropine: approved small molecule (0 associated side effects) For use as an adjunct in the therapy of all forms of parkinsonism and also for use in the control of extrapyramidal disorders due to neuroleptic drugs.

ziprasidone: approved small molecule (251 associated side effects) For the treatment of schizophrenia and related psychotic disorders.

clemastine: approved small molecule (53 associated side effects) For the relief of symptoms associated with allergic rhinitis such as sneezing, rhinorrhea, pruritus and acrimation. Also for the management of mild, uncomplicated allergic skin manifestations of urticaria and angioedema. Used as self-medication for temporary relief of symptoms associated with the common cold.

amitriptyline: approved small molecule (109 associated side effects) For the treatment of depression, chronic pain, irritable bowel syndrome, sleep disorders, diabetic neuropathy, agitation and insomnia, and migraine prophylaxis.

olanzapine: approved small molecule (393 associated side effects) For the acute and maintenance treatment of schizophrenia and related psychotic disorders, as well as acute treatment of manic or mixed episodes of bipolar 1 disorder. Intramuscular olanzapine is indicated for the rapid control of agitated patients.

cetirizine: approved small molecule (229 associated side effects) For the relief of symptoms associated with seasonal allergic rhinitis, perennial allergic rhinitis and the treatment of the uncomplicated skin manifestations of chronic idiopathic urticaria

terfenadine: approved, withdrawn small molecule (0 associated side effects) For the treatment of allergic rhinitis, hay fever, and allergic skin disorders.

buclizine: approved small molecule (0 associated side effects) For prevention and treatment of nausea, vomiting, and dizziness associated with motion sickness and vertigo (dizziness caused by other medical problems).

clozapine: approved small molecule (228 associated side effects) For use in patients with treatment-resistant schizophrenia.

doxylamine: approved small molecule (0 associated side effects) Used alone as a short-term sleep aid, in combination with other drugs as a night-time cold and allergy relief drug. Also used in combination with Vitamin B6 (pyridoxine) to prevent morning sickness in pregnant women.

mirtazapine: approved small molecule (272 associated side effects) For the treatment of major depressive disorder.

dexbrompheniramine: approved small molecule (0 associated side effects) For treatment and relief of symptoms of allergies, hay fever, and colds

promazine: approved small molecule (0 associated side effects) Used as an adjunct for short term treatment of moderate and severe psychomotor agitation. Also used to treat agitation or restlessness in the elderly.

triprolidine: approved small molecule (0 associated side effects) For the symptomatic relief of seasonal or perennial allergic rhinitis or nonallergic rhinitis; allergic conjunctivitis;

and mild, uncomplicated allergic skin manifestations of urticaria and angioedema. Also used in combination with other agents for the symptomatic relief of symptoms associated with the common cold.

cyproheptadine: approved small molecule (63 associated side effects) For treatment of perennial and seasonal allergic rhinitis, vasomotor rhinitis, allergic conjunctivitis due to inhalant allergens and foods, mild uncomplicated allergic skin manifestations of urticaria and angioedema, amelioration of allergic reactions to blood or plasma, cold urticaria, dermatographism, and as therapy for anaphylactic reactions adjunctive to epinephrine.

loratadine: approved small molecule (31 associated side effects)

A self-medication that is used alone or in combination with pseudoephedrine sulfate for the symptomatic relief of seasonal allergic rhinitis. Also used for the symptomatic relief of pruritus, erythema, and urticaria associated with chronic idiopathic urticaria in patients (not for children under 6 unless directed by a clinician).

imipramine: approved small molecule (100 associated side effects) For the relief of symptoms of depression and as temporary adjunctive therapy in reducing enuresis in children aged 6 years and older. May also be used to manage panic disorders, with or without agoraphobia, as a second line agent in ADHD, management of eating disorders, for short-term management of acute depressive episodes in bipolar disorder and schizophrenia, and for symptomatic treatment of postherpetic neuralgia.

chlorpromazine: approved small molecule (111 associated side effects) For the treatment of schizophrenia, control nausea and vomiting, For relief of restlessness and apprehension before surgery, adjunct in the treatment of tetanus, control the manifestations of the manic type of manic-depressive illness.

nortriptyline: approved small molecule (91 associated side effects) For the treatment of depression, chronic pain, irritable bowel syndrome, sleep disorders, diabetic neuropathy, agitation and insomnia, and migraine prophylaxis.

hydroxyzine: approved small molecule (12 associated side effects) For symptomatic relief of anxiety and tension associated with psychoneurosis and as an adjunct in organic disease states in which anxiety is manifested. Useful in the management of pruritus due to allergic conditions such as chronic urticaria.

cinnarizine: approved small molecule (0 associated side effects) For the treatment of vertigo/meniere's disease, nausea and vomiting, motion sickness and also useful for vestibular symptoms of other origins.

astemizole: approved, withdrawn small molecule (0 associated side effects) Astemizole was indicated for use in the relieving allergy symptoms, particularly rhinitis and conjunctivitis. It has been withdrawn from the market however due to concerns of arrhythmias.

trazodone: approved small molecule (194 associated side effects) For the treatment of depression.

histamine phosphate: approved small molecule (0 associated side effects) Histamine phosphate is indicated as a diagnostic aid for evaluation of gastric acid secretory function.

azatadine: approved small molecule (0 associated side effects)  
For the relief of the symptoms of upper respiratory mucosal

congestion in perennial and allergic rhinitis, and for the relief of nasal congestion and eustachian t.b. congestion.

trimipramine: approved small molecule (0 associated side effects) For the treatment of depression and depression accompanied by anxiety, agitation or sleep disturbance

risperidone: approved small molecule (532 associated side effects) For the treatment of schizophrenia in adults and in adolescents, ages 13 to 17, and for the short-term treatment of manic or mixed episodes of bipolar I disorder in children and adolescents ages 10 to 17. May also be used to manage symptoms of inappropriate behavior due to aggression and/or psychosis in patients with severe dementia.

meclizine: approved small molecule (8 associated side effects) For the prevention and treatment of nausea, vomiting, or dizziness associated with motion sickness.

carbinoxamine: approved small molecule (52 associated side effects) For symptomatic relief of seasonal and perennial allergic rhinitis and vasomotor rhinitis, as well as allergic conjunctivitis caused by foods and inhaled allergens. Also for the relief of allergic reactions to blood or plasma, and the symptomatic management of mild, uncomplicated allergic skin manifestations of urticaria and angioedema.

epinastine: approved small molecule (12 associated side effects) For the prevention of itching associated with allergic conjunctivitis.

benzquinamide: approved small molecule (0 associated side effects) Used to prevent and treat nausea and vomiting associated with anesthesia and surgery, administered intramuscularly or intravenously.

olopatadine: approved small molecule (38 associated side effects) For the treatment of ocular itching associated with allergic conjunctivitis.

propiomazine: approved small molecule (0 associated side effects) Propiomazine is largely used for its antihistaminic sleep inducing effects in treating insomnia.

tripelennamine: approved small molecule (0 associated side effects) Used for the symptomatic relief of hypersensitivity reactions, coughs, and the common cold.

tolazoline: approved small molecule (0 associated side effects) For the treatment of pulmonary artery anomalies

pemirolast: approved small molecule (0 associated side effects) For the prevention of itching of the eyes caused by allergies such as hay fever, and allergic conjunctivitis

methdilazine: approved small molecule (0 associated side effects) Used for the symptomatic relief of hypersensitivity reactions and particularly for the control of pruritic skin disorders

ketotifen: approved small molecule (44 associated side effects) Indicated as an add-on or prophylactic oral medication in the chronic treatment of mild atopic asthmatic children. Also used as self-medication for the temporary relief of itching of the eye due to allergic conjunctivitis (ophthalmic).

maprotiline: approved small molecule (0 associated side effects) For treatment of depression, including the depressed phase of bipolar depression, psychotic depression, and involuntional

melancholia, and may also be helpful in treating certain patients suffering severe depressive neurosis.

fexofenadine: approved small molecule (65 associated side effects) For management of Seasonal allergic rhinitis

desloratadine: approved small molecule (59 associated side effects) For the relief of symptoms of seasonal allergic rhinitis, perennial (non-seasonal) allergic rhinitis. Desloratidine is also used for the symptomatic treatment of pruritus and urticaria (hives) associated with chronic idiopathic urticaria.

azelastine: approved small molecule (107 associated side effects) For the symptomatic treatment of seasonal allergic rhinitis and non-allergic rhinitis, as well as symptomatic relief of ocular itching associated with allergic conjunctivitis.

dimenhydrinate: approved small molecule (0 associated side effects) Used for treating vertigo, motion sickness, and nausea associated with pregnancy.

promethazine: approved small molecule (80 associated side effects) For the treatment of allergic disorders, and nausea/vomiting.

mequitazine: approved small molecule (0 associated side effects) For the treatment of Hay fever, urticaria (hives) and allergic rhinitis

diphenhydramine: approved small molecule (51 associated side effects) For the treatment of symptoms associated with Vertigo/Meniere's disease, nausea and vomiting, motion sickness and insect bite.

emedastine: approved small molecule (17 associated side effects) For the temporary relief of the signs and symptoms of allergic conjunctivitis.

levocabastine: approved small molecule (19 associated side effects) As an ophthalmic for the temporary relief of the signs and symptoms of seasonal allergic conjunctivitis. Also used as a nasal spray for allergic rhinitis.

chlorpheniramine: approved small molecule (47 associated side effects) For the treatment of rhinitis, urticaria, allergy, common cold, asthma and hay fever.

doxepin: approved small molecule (210 associated side effects) Labeled indications: depression and insomnia. Unlabeled indications: chronic and neuropathic pain, anxiety, idiopathic urticaria.

diphenylpyraline: approved small molecule (0 associated side effects) For use in the treatment of allergic rhinitis, hay fever, and allergic skin disorders.

desipramine: approved small molecule (120 associated side effects) For relief of symptoms in various depressive syndromes, especially endogenous depression. It has also been used to manage chronic peripheral neuropathic pain, as a second line agent for the management of anxiety disorders (e.g. panic disorder, generalized anxiety disorder), and as a second or third line agent in the ADHD management.

orphenadrine: approved small molecule (28 associated side effects) Indicated for the treatment of Parkinson's disease.

escitalopram: approved small molecule (0 associated side effects) Labeled indications include major depressive disorder (MDD) and generalized anxiety disorder (GAD). Unlabeled indications

include treatment of mild dementia-associated agitation in nonpsychotic patients.

cyclizine: approved small molecule (0 associated side effects)  
For prevention and treatment of nausea, vomiting, and dizziness associated with motion sickness, and vertigo (dizziness caused by other medical problems).

quetiapine: approved small molecule (359 associated side effects) For the treatment of schizophrenia and related psychotic disorders.

bromodiphenhydramine: approved small molecule (0 associated side effects) For management of symptoms related to hay fever and other types of allergy and used to help bring up phlegm, thin secretions, and make a cough productive.

aripiprazole: approved small molecule (630 associated side effects) For the treatment of schizophrenia and related psychotic disorders.

chlorprothixene: approved small molecule (0 associated side effects) For treatment of psychotic disorders (e.g. schizophrenia) and of acute mania occurring as part of bipolar disorders.

trimeprazine: approved small molecule (0 associated side effects) Used to prevent and relieve allergic conditions which cause pruritus (itching) and urticaria (some allergic skin reactions).

paliperidone: approved small molecule (216 associated side effects) For the treatment of schizophrenia.

methotrimeprazine: approved small molecule (0 associated side effects) For the treatment of psychosis, particular those of schizophrenia, and manic phases of bipolar disorder.

aceprometazine: approved small molecule (0 associated side effects) Aceprometazine is often used in combination with meprobamate for the treatment of sleep disorders.

phenindamine: approved small molecule (0 associated side effects) Used to treat sneezing, runny nose, itching, watery eyes, hives, rashes, itching, and other symptoms of allergies and the common cold.

chlorthalidone: approved small molecule (0 associated side effects) Used in the treatment of dry cough.

flunarizine: approved small molecule (0 associated side effects) Used in the prophylaxis of migraine, occlusive peripheral vascular disease, vertigo of central and peripheral origin, and as an adjuvant in the therapy of epilepsy.

bepotastine: approved small molecule (0 associated side effects) For the treatment of allergic conjunctivitis and urticaria/pruritus.

mianserin: approved small molecule (0 associated side effects)  
For the treatment of depression.

mepyramine: approved small molecule (0 associated side effects)  
Mepyramine is a first generation antihistamine used in treating allergies, symptomatic relief of hypersensitivity reaction, and in pruritic skin disorders.

betahistine: approved small molecule (18 associated side effects) For the reduction of episodes of vertigo associated with Ménière's disease.



alcaftadine: approved small molecule (0 associated side effects) For the prevention of itching associated with allergic conjunctivitis.

antazoline: approved small molecule (0 associated side effects) Used to relieve nasal congestion and in eye drops, usually in combination with naphazoline, to relieve the symptoms of allergic conjunctivitis.

chloropyramine: approved small molecule (0 associated side effects) For the treatment of allergic conjunctivitis, allergic rhinitis, bronchial asthma, and other atopic (allergic) conditions.

dimethindene: approved small molecule (0 associated side effects) Indicated as symptomatic treatment of allergic reactions: urticaria, allergies of the upper respiratory tract such as hay fever and perennial rhinitis, food and drug allergies; pruritus of various origins, except pruritus due to cholestasis; insect bites. Dimethindene is also indicated for pruritus in eruptive skin diseases such as chicken-pox. Dimethindene can also be used as an adjuvant in eczema and other pruriginous dermatoses of allergic origin.

isothipendyl: approved small molecule (0 associated side effects) For the topical treatment of itching associated with allergic reactions.

1047 known side effects mediated through drugs targeting this protein:

Abasia Abdominal discomfort Abdominal distension Abdominal pain Abdominal pain lower Abdominal pain upper Abdominal tenderness Abnormal dreams Abnormal faeces Abscess Accommodation disorder Acidosis Acne Acute abdomen Acute coronary syndrome Acute psychosis Adenocarcinoma Adenoma benign Adjustment disorder Affect lability Affective disorder Ageusia Aggression Agitation Agoraphobia Agranulocytosis Akathisia Akinesia Alanine aminotransferase increased Albuminuria Alcohol intolerance Alkalosis Alopecia Altered state of consciousness Amblyopia Amenorrhoea Amnesia Amyotrophic lateral sclerosis Anaemia Anaemia macrocytic Anaphylactic shock Anaphylactoid reaction Anger Angina pectoris Angioedema Angiopathy Angle closure glaucoma Anorectal disorder Anorgasmia Anosmia Antidiuretic hormone abnormality Antinuclear antibody positive Antisocial behaviour Antisocial personality disorder Anxiety Aortic dissection Apathy Aphasia Aphthous stomatitis Aplastic anaemia Apnoea Appendicitis Application site reaction Apraxia Arrhythmia Arrhythmia supraventricular Arterial occlusive disease Arteritis Arthralgia Arthritis Arthropathy Ascites Asocial behaviour Aspartate aminotransferase increased Asphyxia Aspiration Asthenia Asthma Ataxia Atelectasis Athetosis Atrial fibrillation Atrial flutter Atrioventricular block first degree Automatism Autonomic neuropathy Azotaemia Back pain Balance disorder Basophilia Benign prostatic hyperplasia Bladder dilatation Bladder pain Blepharitis Blepharospasm Blindness Blister Blood acid phosphatase increased Blood alkaline phosphatase increased Blood amylase increased Blood antidiuretic hormone abnormal Blood bilirubin

increased Blood cholesterol increased Blood creatine phosphokinase  
increased Blood creatinine increased Blood disorder Blood  
glucose decreased Blood glucose increased Blood insulin  
increased Blood iron decreased Blood lactate dehydrogenase  
increased Blood potassium decreased Blood potassium increased  
Blood pressure abnormal Blood pressure diastolic decreased  
Blood pressure fluctuation Blood pressure increased Blood  
pressure systolic decreased Blood prolactin increased Blood  
testosterone decreased Blood triglycerides increased Blood  
triglycerides normal Blood urea increased Blood uric acid  
increased Blood urine Blood urine present Blunted affect Body  
temperature decreased Body temperature increased Bone disorder  
Bone pain Bradycardia Bradykinesia Bradyphrenia Brain  
oedema Breast cyst Breast discharge Breast discomfort Breast  
disorder Breast disorder female Breast disorder male Breast  
engorgement Breast enlargement Breast feeding Breast pain  
Breast swelling Breast tenderness Bronchitis Bronchopneumonia  
Bronchopneumopathy Bronchospasm Bruxism  
Buccoglossal syndrome Bundle branch block Bundle branch  
block left Bundle branch block right Burning sensation Bursitis  
Cachexia Calculus urinary Cancer in remission Candidiasis  
Carbohydrate tolerance decreased Cardiac arrest Cardiac  
disorder Cardiac failure Cardiac failure congestive Cardiac  
fibrillation Cardiac flutter Cardiac murmur Cardio-  
respiratory arrest Cardiomegaly Cardiomyopathy  
Cardiopulmonary failure Cardiovascular disorder  
Carpal tunnel syndrome Cataplexy Cataract Catatonia Cells  
in urine Cellulitis Cerebral artery embolism Cerebral  
haemorrhage Cerebral infarction Cerebral ischaemia  
Cerebrovascular accident Cerebrovascular disorder  
Cervicitis Chapped lips Cheilitis Chest discomfort Chest  
pain Chills Choking Cholecystitis Cholelithiasis  
Cholestasis Cholinergic syndrome Chorea Choreoathetosis  
Chronic obstructive pulmonary disease Clonus  
Coagulopathy Coccydynia Cognitive disorder Cogwheel  
rigidity Cold sweat Colitis Coma Completed suicide Condition  
aggravated Confusional state Congenital eye disorder  
Conjunctival hyperaemia Conjunctivitis Connective tissue  
disorder Constipation Conversion disorder Convulsion  
Coordination abnormal Corneal infiltrates Corneal lesion  
Corneal staining Costochondritis Cough Crocodile tears  
syndrome Crying Cyanosis Cystitis Cystitis noninfective  
Cytolytic hepatitis Dandruff Deafness Deafness  
transitory Death Decreased appetite Decubitus ulcer Deep vein  
thrombosis Deficiency anaemia Dehydration Delirium Delusion  
Dementia Dementia with Lewy bodies Dental caries  
Dependence Depersonalisation Depressed level of consciousness  
Depression Depressive symptom Derealisation Dermal cyst  
Dermatitis atopic Dermatitis bullous Dermatitis contact  
Dermatitis exfoliative Diabetes mellitus Diabetic coma  
Diabetic hyperglycaemic coma Diabetic hyperosmolar coma  
Diabetic ketoacidosis Diarrhoea Diplopia Discomfort  
Disorientation Disturbance in attention Disturbance in  
sexual arousal Diverticulitis Dizziness Dizziness exertional  
Dizziness postural Drooling Drug abuse Drug dependence

Drug eruption Drug hypersensitivity Drug interaction Drug withdrawal syndrome Drug withdrawal syndrome neonatal Dry eye Dry mouth Dry skin Dry throat Duodenal ulcer Dysaesthesia Dysarthria Dysgeusia Dyskinesia Dysmenorrhoea Dyspepsia Dysphagia Dyspnea Dysphonia Dysphoria Dyspnoea Dystonia Dysuria Ear disorder Ear infection Ear pain Ecchymosis Eczema Effusion Ejaculation delayed Ejaculation disorder Ejaculation failure Elastosis perforans Elderly Electrocardiogram QRS complex Electrocardiogram QT prolonged Electrocardiogram ST segment depression Electrocardiogram ST segment elevation Electrocardiogram T wave inversion Electrocardiogram abnormal Electrocardiogram change Electroencephalogram abnormal Elevated mood Embolism Emotional distress Encephalopathy Endocrine disorder Energy increased Enteritis Enuresis Eosinophil count increased Eosinophilia Epididymitis Epilepsy Epistaxis Erectile dysfunction Eructation Erythema Erythema multiforme Euphoric mood Exfoliative rash Exostosis Extensor plantar response Extrapyrarnidal disorder Extrasystoles Extravasation Eye discharge Eye disorder Eye haemorrhage Eye infection Eye inflammation Eye irritation Eye movement disorder Eye pain Eye pruritus Eye swelling Eyelid disorder Eyelid function disorder Eyelid oedema Eyelid ptosis Face oedema Facial pain Facial paresis Faecal incontinence Faecalith Faecaloma Faeces discoloured Faeces hard Fasting Fatigue Fear Feeling abnormal Feeling cold Feeling hot Feeling jittery Female sexual dysfunction Flank pain Flat affect Flatulence Fluid retention Flushing Foetor hepaticus Folliculitis Formication Fungal infection Fungal skin infection Furuncle Gait disturbance Galactorrhoea Gamma-glutamyltransferase increased Gangrene Gastric disorder Gastric pH decreased Gastric ulcer Gastric ulcer haemorrhage Gastritis Gastroenteritis Gastrointestinal disorder Gastrointestinal haemorrhage Gastrointestinal obstruction Gastrointestinal pain Gastrooesophageal reflux disease Generalised oedema Genital discharge Gingival bleeding Gingival pain Gingival recession Gingivitis Glaucoma Glomerulonephritis Glossitis Glossodynia Glucose tolerance decreased Glucose tolerance impaired Glycosuria Glycosylated haemoglobin increased Goitre Gout Grand mal convulsion Groin pain Gynaecomastia Haematemesis Haematochezia Haematocrit decreased Haematoma Haematuria Haemoglobin Haemoglobin decreased Haemoglobin increased Haemoglobinuria Haemolysis Haemolytic anaemia Haemoptysis Haemorrhage Haemorrhage intracranial Haemorrhagic disorder Haemorrhoids Hallucination Hallucination, auditory Hallucination, visual Hangover Head discomfort Head titubation Headache Hearing impaired Heart disease congenital Heart rate irregular Hemiparesis Hemiplegia Hepatic cirrhosis Hepatic enzyme increased Hepatic failure Hepatic function abnormal Hepatic necrosis Hepatic steatosis Hepatitis Hepatitis A Hepatitis cholestatic Hepatobiliary disease Hepatocellular injury Hepatomegaly Hernia Herpes simplex Herpes virus infection Herpes

zoster          Hiccups          Hirsutism          Homicidal ideation          Hormone  
 level abnormal          Hostility          Hot flush          Hyperacusis          Hyperaemia  
 Hyperaesthesia          Hyperbilirubinaemia          Hyperchloraemia  
 Hyperchlorhydria          Hypercholesterolaemia          Hyperglycaemia  
 Hyperhidrosis          Hyperinsulinism          Hyperkalaemia  
 Hyperkeratosis          Hyperkinesia          Hyperlipidaemia  
 Hypermagnesaemia          Hypernatraemia          Hyperparathyroidism  
 Hyperphosphataemia          Hyperplasia          Hyperprolactinaemia  
 Hyperpyrexia          Hyperreflexia          Hypersensitivity          Hypersomnia  
 Hypertension          Hyperthermia          Hyperthyroidism          Hypertonia  
 Hypertrichosis          Hypertriglyceridaemia          Hypertrophy  
 Hyperuricaemia          Hyperventilation          Hypoaesthesia  
 Hypoaesthesia oral          Hypocalcaemia          Hypochloraemia  
 Hypocholesterolaemia          Hypochromic anaemia          Hypoglycaemia  
 Hypohidrosis          Hypokalaemia          Hypokinesia          Hypomagnesaemia  
 Hypomania          Hypomenorrhoea          Hyponatraemia          Hypophagia  
 Hypoproteinaemia          Hyporeflexia          Hypotension          Hypothermia  
 Hypothyroidism          Hypotonia          Hypoventilation          Hypoxia  
 Idiopathic thrombocytopenic purpura          Ileus paralytic          Ill-  
 defined disorder          Immune system disorder          Impaired healing  
 Inappropriate antidiuretic hormone secretion          Incontinence  
 Increased appetite          Increased bronchial secretion  
 Induration          Infarction          Infection          Infection parasitic  
 Infestation          Inflammation          Influenza          Influenza like illness  
 Inguinal hernia          Initial insomnia          Injection site inflammation  
 Injection site mass          Injection site pain          Injection site  
 phlebitis          Injection site reaction          Insomnia          Intention tremor  
 Intentional self-injury          Intermittent claudication  
 Interstitial lung disease          Intestinal functional disorder  
 Intestinal obstruction          Intestinal perforation          Intraocular  
 pressure increased          Iron deficiency          Iron deficiency anaemia  
 Irritability          Irritable bowel syndrome          Ischaemia  
 Ischaemic stroke          Jaundice          Jaundice cholestatic          Joint  
 contracture          Joint range of motion decreased          Joint stiffness          Joint  
 swelling          Judgement impaired          Keratitis          Keratopathy  
 Ketoacidosis          Ketosis          Labyrinthitis          Lacrimal disorder  
 Lacrimation decreased          Lacrimation increased          Laryngeal oedema  
 Laryngitis          Laryngospasm          Left ventricular failure  
 Leiomyoma          Lens disorder          Lenticular opacities          Lenticular  
 pigmentation          Lethargy          Leukocytoclastic vasculitis  
 Leukocytosis          Leukoderma          Leukopenia          Leukoplakia oral  
 Libido decreased          Libido increased          Lichenoid keratosis          Lip  
 blister          Lip dry          Lip swelling          Liver disorder          Liver  
 function test abnormal          Liver injury          Localised infection  
 Logorrhoea          Loss of consciousness          Loss of libido          Lower  
 respiratory tract infection          Lung adenocarcinoma stage I  
 Lymphadenitis          Lymphadenopathy          Lymphocytosis          Lymphoedema  
 Lymphopenia          Maculopathy          Major depression          Malaise          Male sexual  
 dysfunction          Malignant melanoma          Mania          Masked facies          Mastitis  
 Mediastinal disorder          Megacolon          Melaena          Memory impairment  
 Menopausal symptoms          Menorrhagia          Menstrual disorder  
 Menstruation delayed          Menstruation irregular          Mental disability  
 Mental disorder          Mental retardation          Mental status changes  
 Methaemoglobinaemia          Metrorrhagia          Micturition urgency  
 Middle insomnia          Migraine          Miosis          Mitral valve

incompetence      Mobility decreased      Monocytosis Mood swings  
     Motion sickness      Mouth ulceration      Movement disorder Mucosal  
 inflammation      Mucosal ulceration      Muscle contractions  
 involuntary Muscle contracture      Muscle enzyme increased  
     Muscle relaxant therapy      Muscle rigidity      Muscle spasms  
     Muscle tightness      Muscle twitching      Muscular weakness  
     Musculoskeletal chest pain      Musculoskeletal discomfort  
     Musculoskeletal disorder      Musculoskeletal pain  
     Musculoskeletal stiffness      Myalgia      Myasthenic syndrome  
     Mydriasis      Myelitis      Myocardial infarction      Myocardial  
 ischaemia      Myocarditis Myoclonus      Myopathy      Myositis      Nail  
 discolouration      Nasal congestion      Nasal discomfort      Nasal disorder  
     Nasal dryness      Nasal oedema      Nasal polyps      Nasal  
 septum perforation      Nasopharyngitis      Nausea      Neck pain  
     Necrosis      Neoplasm      Nephritis      Nephrolithiasis      Nervous  
 system disorder      Nervousness Neuralgia      Neuritis      Neurodermatitis  
     Neuroleptic malignant syndrome      Neuropathy peripheral  
     Neurosis      Neutropenia Neutrophil count decreased      Neutrophil  
 count increased      Night sweats      Nightmare      Nocturia      Nocturnal  
 dyspnoea      Nodal arrhythmia      Nodule      Normochromic normocytic  
 anaemia      Nuchal rigidity      Nystagmus      Obesity      Obsessive  
 thoughts      Obstruction Ocular hyperaemia Oculogyric crisis Oedema  
     Oedema peripheral Oesophageal achalasia      Oesophageal disorder  
     Oesophageal ulcer Oesophagitis      Oligomenorrhoea      Oliguria  
     Onychomycosis      Opisthotonus      Oral candidiasis      Oral pain  
     Orchitis noninfective      Orgasm abnormal      Oropharyngeal  
 discomfort      Oropharyngeal pain      Oropharyngeal spasm      Orthostatic  
 hypotension Osteoarthritis      Osteoarthropathy      Osteodystrophy  
     Osteopenia      Osteoporosis      Osteoporotic fracture      Otitis  
 externa      Otitis media      Otitis media chronic      Ovarian cyst  
     Pain      Pain in extremity Pain in jaw Pallor      Palpitations  
     Pancreatitis      Pancreatitis acute      Pancytopenia      Panic  
 attack      Panic disorder      Panic disorder with agoraphobia      Panic  
 reaction      Paraesthesia oral Paralysis      Paranoia      Parkinsonian gait  
     Parkinsonism      Parosmia      Parotid gland enlargement  
     Pathological fracture      Pelvic pain Peptic ulcer      Pericardial  
 effusion      Pericarditis      Perineal pain      Periodontitis  
     Periorbital oedema      Peripheral coldness      Personality  
 disorder      Petechiae      Petit mal epilepsy      Phaeochromocytoma  
     Pharyngeal disorder      Pharyngeal erythema      Pharyngitis  
     Phlebitis      Phlebitis superficial      Phobia      Phonological  
 disorder      Photophobia Photopsia      Photosensitivity reaction  
     Pigmentation disorder      Pituitary tumour benign      Platelet  
 count decreased      Pleural disorder      Pleural effusion      Pneumonia  
     Pneumonia aspiration      Pneumothorax      Poisoning      Pollakiuria  
     Polycythaemia      Polydipsia      Polyp      Polyuria      Postural  
 orthostatic tachycardia syndrome      Posture abnormal      Precocious  
 puberty      Pregnancy test positive      Premature ejaculation  
     Premenstrual syndrome      Pressure of speech      Presyncope  
     Priapism      Productive cough      Prostatitis      Protein urine present  
     Proteinuria      Protrusion tongue Pruritus      Pruritus generalised  
     Pruritus genital      Psoriasis      Psychiatric symptom      Psychomotor  
 retardation      Psychotic disorder      Puberty      Pulmonary congestion  
     Pulmonary embolism      Pulmonary function test decreased  
     Pulmonary oedema      Purpura      Pyelonephritis      Pyuria      Rales

Rash erythematous Rash generalised Rash maculo-papular Rash  
papular Rash pustular Rash vesicular Rectal haemorrhage  
Red blood cell count decreased Red blood cell sedimentation  
rate increased Reflux oesophagitis Regressive behaviour Renal  
failure Renal failure acute Renal pain Respiratory alkalosis  
Respiratory arrest Respiratory depression Respiratory  
disorder Respiratory distress Respiratory failure Respiratory  
tract congestion Respiratory tract infection Respiratory tract  
infection viral Restless legs syndrome Retching Retinal artery  
occlusion Retinal disorder Retinitis pigmentosa Retrograde  
ejaculation Rhabdomyolysis Rheumatoid arthritis Rhinitis  
Rhinitis allergic Rhinitis perennial Rhinitis seasonal  
Rhinorrhoea Rhonchi Rosacea Salivary gland disorder  
Salivary gland enlargement Salivary hypersecretion  
Sarcoidosis Sarcosinaemia Scab Schizoaffective disorder  
Schizophrenia Schizophreniform disorder Sciatica  
Scotoma Seasonal allergy Seborrhoeic dermatitis Sedation  
Sensation of foreign body Sensation of heaviness Sensory  
loss Sepsis Septic shock Severe acute respiratory syndrome  
Sexual dysfunction Shock Sinus arrhythmia Sinus bradycardia  
Sinus congestion Sinus disorder Sinus headache Sinus  
tachycardia Sinusitis Skin discolouration Skin disorder Skin  
exfoliation Skin hypertrophy Skin irritation Skin lesion Skin mass  
Skin papilloma Skin ulcer Sleep apnoea syndrome Sleep  
disorder Sleep paralysis Sleep talking Sluggishness Small  
intestinal obstruction Sneezing Social avoidant behaviour  
Somnambulism Somnolence Speech disorder Sputum increased  
Status epilepticus Stevens-Johnson syndrome Sticky skin  
Stillbirth Stomatitis Stridor Stupor Subarachnoid  
haemorrhage Subcutaneous abscess Subdural haematoma Sudden  
death Suicidal ideation Suicide attempt Supraventricular  
extrasystoles Supraventricular tachycardia Surgery  
Suspiciousness Swelling Swelling face Swollen tongue  
Syncope Synostosis Systemic lupus erythematosus Tachycardia  
Tardive dyskinesia Tenderness Tendon disorder Tendonitis  
Tenosynovitis Tension Tension headache Testicular  
disorder Testicular pain Testicular swelling Tetany  
Thinking abnormal Thirst Thought blocking Throat irritation  
Throat tightness Thrombocytopenia Thrombocytopenic purpura  
Thrombocytosis Thrombophlebitis Thrombosis Thrombotic  
thrombocytopenic purpura Thyroid disorder Thyroiditis Tic  
Tinnitus Tongue discolouration Tongue disorder Tongue dry  
Tongue oedema Tongue paralysis Tongue spasm Tonsillar  
hypertrophy Tonsillitis Tooth abscess Tooth disorder Tooth  
impacted Tooth infection Toothache Torsade de pointes  
Torticollis Toxic epidermal necrolysis Toxicity to various  
agents Tracheobronchitis Transaminases increased Transient  
ischaemic attack Tremor Trismus Tuberculin test positive  
Tubulointerstitial nephritis Ulcer Ulcer haemorrhage Unintended  
pregnancy Unresponsive to stimuli Upper respiratory tract  
infection Urethral disorder Urethritis Urinary hesitation  
Urinary incontinence Urinary retention Urinary tract disorder  
Urinary tract infection Urine abnormality Urine analysis  
abnormal Urine output increased Urosepsis Urticaria Urticaria  
chronic Uterine disorder Uterine haemorrhage Uterine leiomyoma

Uterovaginal prolapse VIIth nerve paralysis Vaginal discharge  
 Vaginal haemorrhage Vaginal infection Vaginal inflammation  
 Varicella Varicose vein Vascular headache Vascular purpura  
 Vasculitis Vasodilation procedure Venous thrombosis Ventricular  
 arrhythmia Ventricular extrasystoles Ventricular fibrillation  
 Ventricular tachycardia Vertigo Viral diarrhoea Viral  
 infection Vision blurred Visual acuity reduced Visual impairment  
 Vomiting Vulvovaginal candidiasis Vulvovaginal dryness  
 Vulvovaginal mycotic infection Vulvovaginal pruritus  
 Vulvovaginitis Water intoxication Weight decreased  
 Weight fluctuation Weight increased Wheezing White blood  
 cell count decreased White blood cell count increased White blood  
 cells urine positive Withdrawal syndrome Xerophthalmia  
 Xerosis Yawning

\*\*\*\*\*  
 \*\*\*\*\*

Sodium channel protein type 4 subunit alpha - Group: Channel  
 Treated with:

diclofenac: approved small molecule (310 associated side effects) For the acute and chronic treatment of signs and symptoms of osteoarthritis and rheumatoid arthritis.  
 propofol: approved small molecule (163 associated side effects) Used for induction and/or maintenance of anaesthesia and for management of refractory status epilepticus.  
 zonisamide: approved small molecule (190 associated side effects) For use as adjunctive treatment of partial seizures in adults with epilepsy.  
 flecainide: approved small molecule (131 associated side effects) Flecainide is a class Ic antiarrhythmic agent and as such, it is used for the prevention of paroxysmal supraventricular tachycardias (PSVT), including atrioventricular nodal reentrant tachycardia, atrioventricular reentrant tachycardia and other supraventricular tachycardias of unspecified mechanism associated with disablin.  
 fospropofol: approved small molecule (0 associated side effects) Used for induction and/or maintenance of anaesthesia and for management of refractory status epilepticus.

459 known side effects mediated through drugs targeting this protein:

Abdominal distension Abdominal pain upper Abnormal dreams  
 Abscess Acidosis Acne Acute coronary syndrome  
 Affect lability Ageusia Agitation Agranulocytosis  
 Akathisia Alanine aminotransferase increased Albuminuria  
 Alopecia Amblyopia Amenorrhoea Amnesia Anaemia  
 Anaphylactic shock Anaphylactoid reaction Angina pectoris  
 Angioedema Angiopathy Anorectal disorder Anxiety  
 Aortic dissection Apathy Aphasia Aphthous stomatitis  
 Aplastic anaemia Apnoea Application site reaction  
 Arrhythmia Arrhythmia supraventricular Arteriosclerosis  
 Arthralgia Arthritis Aspartate aminotransferase increased  
 Asthenia Asthma Ataxia Atrial fibrillation  
 Atrioventricular block Atrophy Azotaemia Back pain  
 Balance disorder Bladder pain Bleeding time prolonged  
 Blindness Blister Blood alkaline phosphatase increased

Blood creatine phosphokinase increased Blood creatinine  
 increased Blood disorder Blood lactate dehydrogenase increased  
 Blood urea increased Body temperature increased Bone pain  
 Bradycardia Breast disorder Breath odour Bronchitis  
 Bronchospasm Bundle branch block Burning sensation  
 Calculus bladder Cardiac arrest Cardiac disorder Cardiac  
 failure Cardiac failure congestive Cardiac fibrillation  
 Cardiac output decreased Cardiovascular disorder  
 Cerebrovascular accident Chest pain Chills Cholangitis  
 Cholecystitis Cholelithiasis Cholestasis Coagulopathy  
 Cognitive disorder Colitis ulcerative Coma Confusional  
 state Conjunctival hyperaemia Conjunctivitis allergic  
 Constipation Conversion disorder Convulsion  
 Coordination abnormal Corneal deposits Corneal disorder  
 Corneal erosion Corneal infiltrates Corneal oedema  
 Corneal opacity Cough Cystitis Cystitis noninfective  
 Deafness Death Decreased appetite Dehydration Delirium  
 Dental caries Dependence Depersonalisation Depressed level  
 of consciousness Dermatitis bullous Dermatitis contact  
 Dermatitis exfoliative Diarrhoea Diarrhoea haemorrhagic  
 Diplopia Discomfort Disinhibition Disorientation  
 Disturbance in attention Disturbance in sexual arousal  
 Dizziness Drug abuse Drug effect increased Drug ineffective  
 Dry mouth Dry skin Duodenal ulcer Duodenitis Dysarthria  
 Dysgeusia Dyskinesia Dyspepsia Dysphagia Dysphonia  
 Dyspnoea Dysthymic disorder Dystonia Dysuria Ear  
 pain Ecchymosis Eczema Electrocardiogram ST segment  
 Electrocardiogram ST segment depression Electrocardiogram  
 abnormal Embolism Encephalopathy Enterocolitis haemorrhagic  
 Enuresis Eosinophilia Epistaxis Erectile dysfunction  
 Eructation Erythema multiforme Erythema of eyelid  
 Euphoric mood Extrasystoles Eye allergy Eye disorder  
 Eye inflammation Eye irritation Eye pain Eye pruritus  
 Eyelid oedema Eyelids pruritus Face oedema Faecal  
 incontinence Fatigue Feeling abnormal Flank pain Flat affect  
 Flatulence Fluid retention Flushing Furuncle Gait  
 disturbance Gastric pH decreased Gastritis Gastroenteritis  
 Gastrointestinal disorder Gastrointestinal haemorrhage  
 Gastrointestinal pain Gingival bleeding Gingival hyperplasia  
 Gingivitis Glaucoma Glossitis Gout Gynaecomastia  
 Haematemesis Haematuria Haemoglobin Haemolytic anaemia  
 Haemoptysis Haemorrhage Haemorrhoids Hair disorder  
 Hallucination Headache Hearing impaired Henoch-Schonlein  
 purpura Hepatic cirrhosis Hepatic enzyme increased Hepatic  
 failure Hepatic function abnormal Hepatic necrosis Hepatitis  
 Hepatitis fulminant Hepatobiliary disease Hepatomegaly  
 Hepatorenal syndrome Hereditary disorder Hernia  
 Herpes simplex Herpes virus infection Hiccups Hirsutism  
 Hyperaemia Hyperaesthesia Hyperchlorhydria  
 Hypercholesterolaemia Hyperglycaemia Hyperhidrosis  
 Hyperkalaemia Hyperkinesia Hyperlipidaemia Hyperplasia  
 Hyperreflexia Hypersensitivity Hypertension Hypertonia  
 Hypertrichosis Hypertrophy Hyperventilation Hypoaesthesia  
 Hypoglycaemia Hypokalaemia Hypokinesia Hypomagnesaemia  
 Hyponatraemia Hypotension Hypotonia Hypoventilation



Hypoxia Ileus Ill-defined disorder Immune system disorder  
 Immunodeficiency Incontinence Infarction Infection  
 Infestation Influenza Insomnia Intestinal perforation  
 Intracranial pressure increased Intraocular pressure  
 increased Iritis Irritability Ischaemia Jaundice  
 Jaundice cholestatic Keratitis Lacrimal disorderLacrimation  
 increased Laryngeal oedema Laryngitis Laryngospasm  
 Leukocytosis Leukopenia Libido decreased Lip swelling  
 Loss of consciousness Lung infiltrationLymphadenopathy  
 Malaise Mastitis Melaena Memory impairmentMeningitis  
 aseptic MenorrhagiaMental disabilityMental disorder Metabolic  
 acidosis Microcytic anaemia Micturition disorder Micturition  
 urgency Migraine Moaning Mood swingsMouth ulceration  
 Movement disorderMuscle relaxant therapy Muscle rigidity  
 Muscle spasms Muscle twitching Muscular weakness  
 Musculoskeletal discomfort Musculoskeletal pain  
 Musculoskeletal stiffness Myalgia Myocardial infarction  
 Myocardial ischaemia Myoclonus Nail disorder Nausea  
 Neck pain Necrosis Neonatal disorderNeoplasm malignant  
 Nephritis Nephropathy Nephrotic syndrome Nervous system  
 disorder Nervousness Neuritis Neuropathy peripheral Night  
 blindness Nightmare Nocturia Nodal arrhythmia Nodule  
 Nuchal rigidity Nystagmus ObstructionObstructive airways  
 disorder Ocular hyperaemiaOculogyric crisisOedema peripheral  
 Oesophageal disorder Oesophagitis Oliguria  
 Opisthotonus Osteoarthritis Pain Pain in extremity  
 Palpitations Pancreatitis Pancytopenia Papule  
 Paraesthesia Paraesthesia oralParalysis Paranoia  
 Paresis Parosmia Peptic ulcer Peripheral ischaemia  
 Petechiae Pharyngitis Phlebitis Photophobia Photosensitivity  
 reaction Pneumonia Pneumothorax Pollakiuria Polyuria  
 Presyncope Proctitis Prostatic specific antigen increased  
 Protein urine present ProteinuriaPruritus Psychotic  
 disorder Pulmonary embolism Pulmonary function test decreased  
 Pulmonary oedema Punctate keratitis Purpura Rash Rash  
 maculo-papular Rash pustular Rectal haemorrhage Renal  
 failure acute Renal impairment Renal papillary necrosis  
 Respiratory acidosis Respiratory arrest Respiratory  
 depression Respiratory disorder Respiratory failure  
 Rhabdomyolysis Rhinitis Right ventricular failure  
 Salivary hypersecretion Scotoma Seborrhoeic dermatitis  
 Sepsis Shock Sinus arrest Sinus bradycardiaSinusitis  
 Skin cancerSkin discolouration Skin exfoliation Skin  
 hypertrophySkin irritation Skin mass Skin odour abnormal Skin  
 ulcer Sleep disorder Sneezing Social avoidant behaviour  
 Somnolence Speech disorder Stevens-Johnson syndrome  
 Stomatitis Stupor Supraventricular extrasystoles  
 Supraventricular tachycardiaSwelling Syncope Systemic  
 lupus erythematosus TachycardiaTachypnoea Tension Testicular  
 disorder Thinking abnormalThirst Thrombocytopenia  
 Thrombophlebitis Thrombosis Tic Tinnitus Tongue coated  
 Tooth abscess Toxic epidermal necrolysis Tremor  
 Tubulointerstitial nephritis Ulcerative keratitis Upper  
 airway obstruction Urethral disorderUrinary incontinence  
 Urinary retentionUrinary tract disorder Urine abnormalityUrine

output increased Urticaria VIIth nerve paralysis Vaginal  
haemorrhage Vascular insufficiency Vascular purpura Vasculitis  
Vasodilation procedure Ventricular arrhythmia Ventricular  
extrasystoles Ventricular fibrillation Ventricular  
tachycardia Vertigo Viral infection Vision blurred Visual  
acuity reduced Visual impairment Vitreous floaters Vomiting  
Weight decreased Weight increased Wheezing

\*\*\*\*\*  
\*\*\*\*\*

5-hydroxytryptamine 1F receptor - Group: Receptor

Treated with:

eletriptan: approved small molecule (242 associated side  
effects) For the acute treatment of migraine with or without aura  
in adults.

zolmitriptan: approved small molecule (241 associated side  
effects) For the acute treatment of adult migraine with or without  
auras.

sumatriptan: approved small molecule (317 associated side  
effects) For the treatment of migraine attacks with or without  
aura.

naratriptan: approved small molecule (185 associated side  
effects) For the acute treatment of migraine attacks with or  
without aura in adults.

rizatriptan: approved small molecule (170 associated side  
effects) For treatment of acute migraine attacks with or without  
aura.

523 known side effects mediated through drugs targeting this  
protein:

Abdominal discomfort Abdominal distension Abdominal pain  
Abdominal pain upper Abnormal dreams Abortion spontaneous  
Abscess Accommodation disorder Acne Acute coronary  
syndrome Adenoma benign Adverse reaction Affect lability  
Aggression Agitation Akathisia Akinesia Alopecia  
Altered state of consciousness Amblyopia Amnesia  
Anaemia Anaphylactic shock Anaphylactoid reaction  
Aneurysm Angina pectoris Angioedema Angiopathy Anorectal  
disorder Anxiety Aortic aneurysm Apathy Aphasia  
Apnoea Arrhythmia Arterial occlusive disease  
Arteriosclerosis Arteriospasm coronary Arteritis Arthralgia  
Arthritis Arthropathy Asthenia Asthma Ataxia  
Atrial fibrillation Atrial flutter Atrioventricular block  
Atrophy Back pain Bladder pain Blindness Blood  
alkaline phosphatase increased Blood bilirubin abnormal Blood  
creatine phosphokinase increased Blood disorder Blood pressure  
increased Body temperature decreased Body temperature increased  
Bone neoplasm Bone pain Bradycardia Bradykinesia  
Breast cancer Breast discharge Breast neoplasm Breast pain  
Breast swelling Breath odour Bronchitis Bronchospasm  
Burning sensation Candidiasis Cardiac disorder Cardiac  
fibrillation Cardiac flutter Cardiac murmur Cardiomyopathy  
Catatonia Cellulitis Cerebral infarction Cerebral  
ischaemia Cerebrovascular accident Cerebrovascular disorder  
Chest discomfort Chest pain Chills Choking Choking  
sensation Cholelithiasis Choreoathetosis Colitis ischaemic

Completed suicide Confusional state Conjunctivitis  
 Constipation Conversion disorder Convulsion  
 Coordination abnormal Cough Cyanosis Cystitis Cystitis  
 noninfective Deafness Death Decreased appetite Deformity  
 Dehydration Dementia Dependence Depersonalisation Depressed  
 level of consciousness Depression Dermatitis Dermatitis atopic  
 Dermatitis exfoliative Diarrhoea Diarrhoea haemorrhagic  
 Diplegia Diplopia Discomfort Disorientation  
 Dissociation Disturbance in attention Disturbance in  
 sexual arousal Dizziness Drug abuse Dry eye Dry mouth Dry  
 skin Dry throat Dysaesthesia Dysarthria Dysgeusia Dyskinesia  
 Dysmenorrhoea Dyspepsia Dysphagia Dysphonia Dyspnoea  
 Dysthymic disorder Dystonia Dysuria Ear disorder  
 Ear infection Ear pain Ecchymosis Eczema  
 Electrocardiogram PR prolongation Electrocardiogram abnormal  
 Electrocardiogram change Embolism Endometriosis  
 Eosinophilia Epistaxis Erectile dysfunction Eructation  
 Erythema Euphoric mood Extrapyrmidal disorder  
 Extrasystoles Eye haemorrhage Eye irritation Eye oedema  
 Eye pain Eye pruritus Eye swelling Eyelid ptosis  
 Face oedema Facial pain Fallopien tube disorder Fatigue  
 Feeling abnormal Feeling cold Feeling hot Feeling of body  
 temperature change Flat affect Flatulence Fluid retention  
 Flushing Foetor hepaticus Folliculitis Gait disturbance  
 Galactorrhoea Gastric disorder Gastric ulcer Gastritis  
 Gastroenteritis Gastrointestinal carcinoma Gastrointestinal  
 disorder Gastrointestinal haemorrhage Gastrointestinal pain  
 Gastrooesophageal reflux disease Genital discharge  
 Genitourinary tract neoplasm Gingivitis Glossitis Glossodynia  
 Glycosuria Goitre Haematemesi Haematoma Haematuria  
 Haemoglobin Haemolytic anaemia Haemorrhage Haemorrhage  
 urinary tract Haemorrhoids Hair disorder Hallucination  
 Hangover Hearing impaired Hemiplegia Hepatic function  
 abnormal Hepatic neoplasm Hepatocellular injury Hernia  
 Herpes virus infection Hiccups Hostility Hot flush  
 Hunger Hyperacusis Hyperaesthesia Hyperbilirubinaemia  
 Hypercholesterolaemia Hyperglycaemia Hyperhidrosis  
 Hyperkinesia Hyperlipidaemia Hyperpathia Hypersensitivity  
 Hypersomnia Hypertension Hypertensive crisis  
 Hyperthyroidism Hypertonia Hypertrophy Hyperventilation  
 Hypervigilance Hypoaesthesia Hypoaesthesia oral  
 Hypoglycaemia Hypokinesia Hyporeflexia Hypotension  
 Hypothermia Hypothyroidism Hypotonia Ill-defined disorder  
 Immune system disorder Incontinence Increased appetite  
 Increased bronchial secretion Induration Infarction  
 Infection Inflammation Influenza Injection site  
 reaction Insomnia Intervertebral disc disorder Intestinal  
 obstruction Intracranial pressure increased Irritability  
 Ischaemia Jaundice Keratitis Ketonuria Laboratory test  
 abnormal Labyrinthitis Lacrimal disorder Lacrimation increased  
 Laryngeal oedema Laryngitis Leiomyoma Leukocytoclastic  
 vasculitis Leukopenia Libido decreased Lipoatrophy Lipohypertrophy  
 Liver disorder Liver function test abnormal Loss of  
 consciousness Lower respiratory tract infection Lymphadenopathy  
 Major depression Malaise Mania Mass Mastitis Melaena

Memory impairment Meniere's disease Menopausal symptoms  
 Menorrhagia Menstrual disorder Mental disability Mental  
 disorder Metrorrhagia Micturition urgency Monocytosis  
 Monoplegia Mood swings Motor dysfunction Movement disorder  
 Muscle atrophy Muscle contractions involuntary Muscle  
 fatigue Muscle relaxant therapy Muscle rigidity Muscle  
 spasms Muscle tightness Muscle twitching Muscular weakness  
 Musculoskeletal deformity Musculoskeletal discomfort  
 Musculoskeletal pain Musculoskeletal stiffness Myalgia  
 Mydriasis Myocardial infarction Myocardial ischaemia  
 Myopathy Nasal dryness Nasal inflammation  
 Nasopharyngitis Nausea Neck pain Necrosis Neoplasm  
 Neoplasm malignant Nephrolithiasis Nerve root lesion  
 Nervous system disorder Nervousness Neuralgia Neuritis  
 Neuropathy peripheral Neurosis Nodule Nystagmus  
 Obstruction Oculogyric crisis Oedema Oedema peripheral  
 Oesophagitis Optic ischaemic neuropathy Optic nerve  
 disorder Oral pruritus Oropharyngeal discomfort  
 Oropharyngeal pain Orthostatic hypotension  
 Osteoarthritis Osteoporosis Otitis externa Otitis  
 media Pain Pain in jaw Pain of skin Pallor Palpitations  
 Pancreatitis Pancytopenia Panic disorder Panic  
 reaction Paraesthesia Paraesthesia oral Paralysis Parathyroid  
 disorder Parathyroid tumour Parosmia Peptic ulcer  
 Peripheral coldness Peripheral vascular disorder Personality  
 change Pharyngeal disorder Pharyngeal haemorrhage Pharyngeal  
 oedema Pharyngitis Phlebitis Phobia Phonophobia Photophobia  
 Photopsia Photosensitivity reaction Pituitary tumour  
 Pleurisy Pneumonia Poisoning Pollakiuria Polydipsia  
 Polyuria Presyncope Prinzmetal angina Pruritus Psoriasis  
 Psychomotor retardation Psychotic disorder Pulmonary  
 embolism Pulmonary oedema Pulse abnormal Purpura  
 Pyelonephritis Radiculopathy Rash Rash maculo-papular  
 Raynaud's phenomenon Rectal haemorrhage Regurgitation  
 Renal failure acute Renal pain Respiration abnormal  
 Respiratory disorder Respiratory tract infection Retching  
 Retinal artery occlusion Retinal vascular occlusion  
 Retinal vein thrombosis Rheumatoid arthritis Rhinitis  
 Rhinitis allergic Rhinorrhoea Salivary gland enlargement  
 Salivary hypersecretion Scleral disorder Scotoma  
 Seborrhoeic dermatitis Sedation Sensation of heaviness  
 Sensation of pressure Sensory loss Shock Sialoadenitis  
 Sinus arrhythmia Sinus disorder Sinusitis Skin  
 discolouration Skin disorder Skin exfoliation Skin hypertrophy  
 Skin tightness Skin wrinkling Sleep disorder Sneezing  
 Social avoidant behaviour Somnolence Speech disorder  
 Splenic infarction Sputum increased Stomatitis Stupor  
 Subarachnoid haemorrhage Substance abuse Supraventricular  
 extrasystoles Swelling Swelling face Swollen tongue  
 Syncope Tachyarrhythmia Tachycardia Tachypnoea Tardive  
 dyskinesia Temperature intolerance Temporal arteritis  
 Tenderness Tenosynovitis Tension Tetany Thinking  
 abnormal Thirst Throat tightness Thrombocytopenia  
 Thrombophlebitis Thrombosis Thyroid adenoma Thyroiditis  
 Tinnitus Tongue disorder Tongue oedema Tooth disorder

Toothache Toxic epidermal necrolysis Tracheitis Transient  
 ischaemic attack Tremor Ulcer Unintended pregnancy Upper  
 respiratory tract infection Urethral disorderUrethritis Urinary  
 incontinence Urinary tract disorder Urinary tract infection  
 Urine output increased Urogenital disorder Urticaria  
 Uterine disorder Uterine leiomyomaUterovaginal prolapse VIIth  
 nerve paralysis Vaginal infectionVaginal inflammation Vascular  
 occlusion Vascular purpura Vasculitis Vasodilation procedure  
 Vasospasm Venous thrombosisVentricular arrhythmia Ventricular  
 extrasystoles Ventricular fibrillation Ventricular  
 tachycardiaVertigo Viral infection Vision blurred Visual  
 acuity reduced Visual impairmentVomiting Weight decreased  
 Weight increased Wheezing Yawning

\*\*\*\*\*  
 \*\*\*\*\*

Chloride channel protein 2 - Group: Channel

Treated with:

lubiprostone: approved small molecule (126 associated side effects) For the treatment of chronic idiopathic constipation in the adult population. Also used for the treatment of irritable bowel syndrome with constipation in women who are 18 years of age or older.

126 known side effects mediated through drugs targeting this protein:

Abdominal discomfort Abdominal distension Abdominal pain lower  
 Abdominal pain upper Abdominal rigidity Abdominal  
 tenderness Adenoma benign Alanine aminotransferase increased  
 Angiopathy Anxiety Aortic dissectionArthralgia Aspartate  
 aminotransferase increased Assisted fertilisation Asthenia  
 Asthma Back pain Body temperature increased Breast  
 feeding Bronchitis Chest discomfort Chest pain Chills Cold  
 sweat Connective tissue disorder Cough Decreased appetite  
 Defaecation urgency Dermatitis Diarrhoea Discomfort  
 Dizziness Drug interaction Dry mouth Dysgeusia Dyspepsia  
 Dyspnoea Electrolyte imbalance Eructation Erythema  
 Faecal incontinence Faeces hardFatigue Feeling abnormal  
 Fibromyalgia Flatulence Flushing Frequent bowel  
 movements Gastric disorder Gastritis Gastroenteritis  
 Gastrointestinal disorder Gastrointestinal pain  
 Gastrointestinal sounds abnormal Gastrooesophageal reflux  
 disease Haemoglobin Haemorrhage Headache Hepatic adenoma Hot  
 flush Hyperhidrosis Hypertension Hypoaesthesia Ill-defined  
 disorder Incontinence Infection Infestation Influenza  
 Insomnia Intestinal functional disorder Joint swelling  
 Lethargy Liver disorder Loss of consciousness Lymphoma  
 Malaise Mediastinal disorder Menopausal symptoms  
 Mental disorder Muscle rigidity Muscle spasms  
 Musculoskeletal discomfort Myalgia Nasopharyngitis  
 Nausea Neoplasm malignant Nervous system disorder  
 Nervousness Oedema Oedema peripheralOropharyngeal pain  
 Pain Pain in extremityPainful respiration Pallor  
 Palpitations Paraesthesia Pollakiuria Pregnancy  
 Presyncope Rash Rebound effect Rectal haemorrhage Renal  
 impairment Respiratory tract infection Retching Shock Sinusitis

Skin irritation Swelling Syncope Tachycardia Tenderness  
Tension Teratogenicity Testicular disorder Throat  
tightness Tremor Upper respiratory tract infection Urinary  
tract infection Urticaria Vertigo Viral diarrhoea Viral  
infection Vomiting Weight increased

\*\*\*\*\*  
\*\*\*\*\*

Activin receptor type-1 - Group: Enzyme

Treated with:

adenosine triphosphate: approved, nutraceutical small molecule  
(0 associated side effects) For nutritional supplementation,  
also for treating dietary shortage or imbalance  
6-[4-(2-piperidin-1-ylethoxy)phenyl]-3-pyridin-4-ylpyrazolo[1,5-  
a]pyrimidine: experimental small molecule (0 associated  
side effects)

known side effects mediated through drugs targeting this protein:

\*\*\*\*\*  
\*\*\*\*\*

Vesicle-associated membrane protein 1 - Group: Other

Treated with:

botulinum toxin type b: approved biotech (0 associated  
side effects) For the treatment of patients with cervical  
dystonia to reduce the severity of abnormal head position and neck  
pain associated with cervical dystonia.

known side effects mediated through drugs targeting this protein:

\*\*\*\*\*  
\*\*\*\*\*

Voltage-gated calcium channel beta 1 subunit splice variant CavB1d -  
Group: Channel

Treated with:

amlodipine: approved small molecule (136 associated side  
effects) For the treatment of hypertension and chronic stable  
angina.

136 known side effects mediated through drugs targeting this  
protein:

Abdominal pain Abnormal dreams Accommodation disorder Acute  
coronary syndrome Agitation Alopecia Amnesia Angioedema  
Angiopathy Anxiety Apathy Arrhythmia Arthralgia  
Arthropathy Asthenia Ataxia Atrial fibrillation Back  
pain Blindness Bradycardia Cardiac failure congestive Cardiac  
fibrillation Chest pain Chills Cholestasis Chronic  
obstructive pulmonary disease Cold sweat Conjunctivitis  
Constipation Cough Decreased appetite Depersonalisation  
Dermatitis Diabetes mellitus Diarrhoea Diplopia Discomfort  
Dizziness postural Dry mouth Dry skin Dysgeusia  
Dyspepsia Dysphagia Dyspnoea Dysuria Epistaxis  
Erythema Erythema multiforme Extrasystoles Eye pain  
Fatigue Feeling abnormal Flat affect Flatulence Flushing  
Gastritis Gastrointestinal pain Gingival hyperplasia  
Gynaecomastia Headache Hepatitis Hot flush

|                              |                              |                       |                             |
|------------------------------|------------------------------|-----------------------|-----------------------------|
| Hyperglycaemia               | Hyperhidrosis                | Hyperplasia           | Hypersensitivity            |
| Hypertension                 | Hypertonia                   | Hypoaesthesia         | Ill-defined                 |
| disorder                     | Increased appetite           | Infarction            | Insomnia                    |
| Ischaemia                    | Jaundice                     | Leukopenia            | Loss of consciousness       |
| Lung disorder                | Malaise                      | Menopausal symptoms   | Micturition disorder        |
| Migraine                     | Muscle spasms                | Muscle twitching      | Muscular weakness           |
| Musculoskeletal discomfort   | Myalgia                      | Myocardial infarction |                             |
| Nausea                       | Nervousness                  | Neuropathy peripheral | Nocturia                    |
| Obstructive airways disorder | Oedema                       | Oedema peripheral     |                             |
| Orthostatic hypotension      | Osteoarthritis               | Pain                  |                             |
| Palpitations                 | Pancreatitis                 | Paraesthesia          | Parosmia                    |
| Peripheral ischaemia         | Peripheral vascular disorder | Pollakiuria           |                             |
| Polyuria                     | Pruritus                     | Purpura               | Rash Rash erythematous Rash |
| maculo-papular               | Rhinitis                     | Sexual dysfunction    | Shock Skin                  |
| discolouration               | Somnolence                   | Sticky skin           | Syncope Tachycardia         |
| Tension                      | Thirst                       | Thrombocytopenia      | Tinnitus Tremor             |
| Urine output increased       | Urticaria                    | Vascular purpura      | Vasculitis                  |
| Ventricular tachycardia      | Vertigo                      | Visual acuity reduced |                             |
| Visual impairment            | Vomiting                     | Weight decreased      | Weight increased            |
| Xerophthalmia                |                              |                       |                             |

\*\*\*\*\*  
\*\*\*\*\*

Monocarboxylate transporter 8 - Group: Transporter

Treated with:

pyruvic acid: approved, nutraceutical small molecule (0 associated side effects) For nutritional supplementation, also for treating dietary shortage or imbalance

l-tyrosine: approved, nutraceutical small molecule (0 associated side effects) Tyrosine is claimed to act as an effective antidepressant, however results are mixed. Tyrosine has also been claimed to reduce stress and combat narcolepsy and chronic fatigue, however these claims have been refuted by some studies.

l-leucine: approved, nutraceutical small molecule (0 associated side effects) Indicated to assist in the prevention of the breakdown of muscle proteins that sometimes occur after trauma or severe stress.

l-tryptophan: approved, nutraceutical small molecule (11 associated side effects) Tryptophan may be useful in increasing serotonin production, promoting healthy sleep, managing depression by enhancing mental and emotional well-being, managing pain tolerance, and managing weight.

levothyroxine: approved small molecule (0 associated side effects) For use alone or in combination with antithyroid agents to treat hypothyroidism, goiter, chronic lymphocytic thyroiditis, myxedema coma, and stupor.

liotrix: approved small molecule (0 associated side effects) May be used to treat primary, secondary or tertiary hypothyroidism. May also be used to suppress thyroid stimulating hormone (TSH) secretion in patients with simple (nontoxic) goiter, subacute or chronic lymphocytic thyroiditis multinodular goiter, and in the management of thyroid cancer. May be used in conjunction with other antithyroid agents to treat thyrotoxicosis to prevent goitrogenesis and hypothyroidism. May also be used for differential diagnosis of suspected mild hyperthyroidism or thyroid gland autonomy.

11 known side effects mediated through drugs targeting this protein:  
Alopecia Decreased appetite Disinhibition Dizziness Dry  
mouth Headache Nausea Psoriasis Rash Somnolence Vomiting  
\*\*\*\*\*

Monocarboxylate transporter 6 - Group: Transporter

Treated with:

pyruvic acid: approved, nutraceutical small molecule (0  
associated side effects) For nutritional supplementation, also  
for treating dietary shortage or imbalance

known side effects mediated through drugs targeting this protein:

\*\*\*\*\*

Chromaffin granule amine transporter - Group: Transporter

Treated with:

ephedra: approved, withdrawn, nutraceutical small molecule (0  
associated side effects) Ephedra is widely used by athletes,  
despite a lack of evidence that it enhances athletic performance.  
Ephedra has also been used for weight loss.  
mdma: illicit, experimental small molecule (0 associated side  
effects) MDMA is a recreational drug. It has no current medical  
uses and is a Schedule I controlled substance in the USA at present.  
methamphetamine: illicit, approved small molecule (30 associated  
side effects) For the treatment of Attention Deficit Disorder  
with Hyperactivity (ADHD) and exogenous obesity.

30 known side effects mediated through drugs targeting this protein:

Agitation Asthenia Cardiac arrest Cardio-respiratory arrest  
Constipation Dependence Depression Diarrhoea Dizziness  
Drug abuse Drug dependence Dry mouth Dysphoria Erectile  
dysfunction Euphoric mood Fatigue Headache Hypersensitivity  
Insomnia Irritability Palpitations Personality  
change Poisoning Psychotic disorder Schizophrenia Skin  
disorder Tachycardia Tic Tremor Urticaria  
\*\*\*\*\*

Growth hormone-releasing hormone receptor - Group: Receptor

Treated with:

sermorelin: approved biotech (0 associated side effects) For  
the treatment of dwarfism, prevention of HIV-induced weight loss

known side effects mediated through drugs targeting this protein:

\*\*\*\*\*

Prostaglandin E2 receptor, EP1 subtype - Group: Receptor

Treated with:

bupivacaine: approved small molecule (137 associated side  
effects) For the production of local or regional anesthesia or  
analgesia for surgery, for oral surgery procedures, for diagnostic  
and therapeutic procedures, and for obstetrical procedures.



carboprost tromethamine: approved small molecule (0 associated side effects) For aborting pregnancy between the 13th and 20th weeks of gestation as calculated from the first day of the last normal menstrual period and in the following conditions related to second trimester abortion: 1. Failure of expulsion of the fetus during the course of treatment by another method; 2. Premature rupture of membranes in intrauterine methods with loss of drug and insufficient or absent uterine activity; 3. Requirement of a repeat intrauterine instillation of drug for expulsion of the fetus; 4. Inadvertent or spontaneous rupture of membranes in the presence of a viable fetus and absence of adequate activity for expulsion. Also for the treatment of postpartum hemorrhage due to uterine atony which has not responded to conventional methods of management.

alprostadil: approved small molecule (0 associated side effects) For palliative, not definitive, therapy to temporarily maintain the patency of the ductus arteriosus until corrective or palliative surgery can be performed in neonates who have congenital heart defects and who depend upon the patent ductus for survival. Also for the treatment of erectile dysfunction due to neurogenic, vasculogenic, psychogenic, or mixed etiology.

bimatoprost: approved small molecule (90 associated side effects) For the reduction of elevated intraocular pressure in patients with open angle glaucoma or ocular hypertension who are intolerant of other intraocular pressure lowering medications or insufficiently responsive (failed to achieve target IOP determined after multiple measurements over time) to another intraocular pressure lowering medication.

dinoprostone: approved small molecule (0 associated side effects) For the termination of pregnancy during the second trimester (from the 12th through the 20th gestational week as calculated from the first day of the last normal menstrual period), as well as for evacuation of the uterine contents in the management of missed abortion or intrauterine fetal death up to 28 weeks of gestational age as calculated from the first day of the last normal menstrual period. Also used in the management of nonmetastatic gestational trophoblastic disease (benign hydatidiform mole). Other indications include improving the cervical inducibility (cervical "ripening") in pregnant women at or near term with a medical or obstetrical need for labor induction, and the management of postpartum hemorrhage.

iloprost: approved small molecule (46 associated side effects)  
Used for the treatment of pulmonary arterial hypertension.

228 known side effects mediated through drugs targeting this protein:

|                                      |                                 |                                      |                                    |
|--------------------------------------|---------------------------------|--------------------------------------|------------------------------------|
| Abscess                              | Acidosis                        | Agitation                            | Alanine aminotransferase increased |
| Anaemia                              | Anal haemorrhage                | Anaphylactic shock                   | Angioedema                         |
| Anorectal disorder                   | Anterior spinal artery syndrome |                                      |                                    |
| Anxiety                              | Apnoea                          | Arachnoiditis                        | Arrhythmia                         |
| Aspartate aminotransferase increased | Asthenia                        | Asthenopia                           |                                    |
| Atrioventricular block               | Back pain                       | Bladder pain                         | Blepharitis                        |
| Blepharospasm                        | Blister                         | Blood alkaline phosphatase increased |                                    |
| Blood creatinine increased           | Blood pressure increased        |                                      |                                    |
| Body temperature increased           | Bradycardia                     | Bronchitis                           |                                    |
| Bronchospasm                         | Burning sensation               | Carbon dioxide increased             |                                    |

Cardiac arrest    Cardiac disorder    Cardiac failure    Cardiac  
 failure congestive    Cardiac fibrillation    Cardiac output  
 decreased    Cataract    Cauda equina syndrome    Cerebrovascular  
 accident    Chalazion    Chest pain    Chills    Cold sweat    Confusional  
 state    Conjunctival disorder    Conjunctival haemorrhage  
     Conjunctival hyperaemia    Conjunctival oedema  
     Conjunctivitis allergic    Constipation    Convulsion  
     Corneal erosion    Corneal oedema    Cough    Cranial nerve  
 paralysis    Cystitis    Cystitis noninfective    Death    Decreased  
 appetite    Dermatitis    Dermatitis bullous    Diarrhoea    Diplegia  
     Diplopia    Discomfort    Disease progression    Dizziness  
 postural    Drug hypersensitivity    Dry eye    Dry mouth    Dysarthria  
     Dyschezia    Dysgeusia    Dyspepsia    Dyspnoea    Epistaxis  
     Erythema    Erythema of eyelid    Extradural abscess  
     Extrasystoles    Extravasation    Eye discharge    Eye  
 irritation    Eye oedema    Eye pain    Eye pruritus    Eye swelling  
     Eyelid irritation    Eyelid oedema    Eyelid pain    Eyelids pruritus  
     Feeling abnormal    Feeling hot    Flushing    Foetor hepaticus  
     Fungal infection    Gamma-glutamyltransferase increased  
     Gastrointestinal disorder    Gingival bleeding    Glossitis  
     Glossodynia    Growth of eyelashes    Haemoglobin    Haemoptysis  
     Haemorrhage    Haemorrhagic anaemia    Hair growth abnormal  
     Headache    Hepatic function abnormal    Hepatocellular injury  
     Hernia    Hirsutism    Hordeolum    Hyperaemia    Hypercapnia  
     Hypercholesterolaemia    Hyperhidrosis    Hypersensitivity  
     Hypertension    Hypoaesthesia oral    Hypotension    Hypotonia  
     Hypoxia    Incontinence    Infection    Infestation  
     Inflammation    Influenza    Insomnia    Iritis    Keratitis  
     Laboratory test abnormal    Lacrimation increased    Laryngeal  
 oedema    Laryngospasm    Lethargy    Liver disorder    Liver  
 function test abnormal    Loss of consciousness    Maculopathy    Madarosis  
     Meningism    Meningitis    Meningitis aseptic    Miosis  
     Monoplegia    Muscle rigidity    Muscle spasms    Muscular weakness  
     Musculoskeletal stiffness    Nasopharyngitis    Nausea    Neck  
 pain    Nervous system disorder    Nervousness    Neuropathy peripheral  
     Nuchal rigidity    Oedema    Oedema peripheral    Osteoarthritis  
     Oxygen saturation decreased    Pain    Pallor    Palpitations  
     Paraesthesia    Paralysis    Paraplegia    Paresis    Pharyngitis  
     Photophobia    Pigmentation disorder    Pneumonia    Procedural pain  
     Prurigo    Pruritus    Pruritus generalised    Pulmonary  
 function test decreased    Punctate keratitis    Rash    Rectal  
 discharge    Renal failure    Respiratory arrest    Respiratory  
 depression    Respiratory failure    Respiratory paralysis    Respiratory  
 tract infection    Retinitis pigmentosa    Rhinitis    Scotoma  
     Sensation of foreign body    Sensory loss    Shock    Sinus  
 bradycardia    Sinusitis    Skin discolouration    Skin hyperpigmentation  
     Sneezing    Somnolence    Supraventricular extrasystoles  
     Supraventricular tachycardia    Swelling face    Syncope  
     Tachycardia    Tension    Teratogenicity    Tinnitus    Tremor  
     Trichorrhexis    Trismus    Upper respiratory tract infection  
     Urinary incontinence    Urinary retention    Urine abnormality    Urine  
 analysis abnormal    Urticaria    Vasoconstriction    Vasodilation procedure  
     Ventricular extrasystoles    Ventricular fibrillation  
     Ventricular tachycardia    Vision blurred    Visual impairment  
     Vitreous floaters    Vomiting    Wheezing

\*\*\*\*\*  
\*\*\*\*\*

Gamma-aminobutyric acid receptor subunit pi - Group: Channel  
Treated with:

lorazepam: approved small molecule (126 associated side effects) For the management of anxiety disorders, and for treatment of status epilepticus.

temazepam: approved small molecule (35 associated side effects) For the short-term treatment of insomnia (generally 7-10 days).

clobazam: illicit,approved small molecule (58 associated side effects) For treatment and management of epilepsy and anxiety disorder.

alprazolam: illicit,approved small molecule (178 associated side effects) For the management of anxiety disorder or the short-term relief of symptoms of anxiety and for the treatment of panic disorder, with or without agoraphobia.

chlordiazepoxide:illicit,approved small molecule (20 associated side effects) For the management of anxiety disorders or for the short-term relief of symptoms of anxiety, withdrawal symptoms of acute alcoholism, and preoperative apprehension and anxiety.

adinazolam: approved small molecule (0 associated side effects) For the treatment of anxiety and status epilepticus.

clorazepate: illicit,approved small molecule (0 associated side effects) For the management of anxiety disorders or for the short-term relief of the symptoms of anxiety. Also used as adjunctive therapy in the management of partial seizures and for the symptomatic relief of acute alcohol withdrawal.

midazolam: illicit,approved small molecule (119 associated side effects) For use as a sedative perioperatively.

flurazepam: illicit,approved small molecule (62 associated side effects) For short-term and intermittent use in patients with recurring insomnia and poor sleeping habits

halazepam: illicit,approved small molecule (0 associated side effects) Used to relieve anxiety, nervousness, and tension associated with anxiety disorders.

diazepam: illicit,approved small molecule (149 associated side effects) Used in the treatment of severe anxiety disorders, as a hypnotic in the short-term management of insomnia, as a sedative and premedicant, as an anticonvulsant, and in the management of alcohol withdrawal syndrome.

oxazepam: approved small molecule (36 associated side effects) For the treatment of anxiety disorders and alcohol withdrawal.

triazolam: illicit,approved,withdrawn small molecule (66 associated side effects) For the short-term treatment of insomnia.

clonazepam: illicit,approved small molecule (228 associated side effects) Used as an anticonvulsant in the treatment of the Lennox-Gastaut syndrome (petit mal variant), akinetic and myoclonic seizures.

estazolam: illicit,approved small molecule (131 associated side effects) For the short-term management of insomnia characterized by difficulty in falling asleep, frequent nocturnal awakenings, and/or early morning awakenings.

bromazepam: illicit, approved small molecule (47 associated side effects) For the short-term treatment of insomnia, short-term treatment of anxiety or panic attacks, if a benzodiazepine is required, and the alleviation of the symptoms of alcohol- and opiate-withdrawal.

clotiazepam: illicit, approved small molecule (0 associated side effects) For the treatment of anxiety disorders.

fludiazepam: illicit, approved small molecule (0 associated side effects) Used for the short-term treatment of anxiety disorders.

prazepam: illicit, approved small molecule (0 associated side effects) For the treatment of anxiety disorders.

quazepam: illicit, approved small molecule (0 associated side effects) Used to treat insomnia.

cinolazepam: approved small molecule (0 associated side effects) For the management of anxiety disorders or for the short-term relief of the symptoms of anxiety or anxiety associated with depressive symptoms.

nitrazepam: approved small molecule (44 associated side effects) Used to treat short-term sleeping problems (insomnia), such as difficulty falling asleep, frequent awakenings during the night, and early-morning awakening.

486 known side effects mediated through drugs targeting this protein:

Abdominal discomfort Abdominal distension Abdominal pain  
Abnormal dreams Abnormal faeces Acidosis Acne Affect  
labiality Ageusia Aggression Agitation Agranulocytosis  
Akathisia Akinesia Alcohol poisoning Alopecia Altered  
state of consciousness Amblyopia Amnesia Anaemia  
Anaphylactic shock Anaphylactoid reaction Anger Angioedema  
Angiopathy Anorectal discomfort Anorectal disorder  
Anterograde amnesia Anxiety Aortic dissection Apathy  
Aphonia Apnoea Appetite disorder Arrhythmia Arterial  
spasm Arthralgia Arthritis Aspartate aminotransferase increased  
Aspiration Asthenia Asthma Ataxia Athetosis  
Atrioventricular block Back pain Balance disorder Bladder  
dysfunction Bladder pain Blindness Blood alkaline phosphatase  
increased Blood bilirubin increased Blood disorder Blood  
glucose decreased Blood thromboplastin decreased Body temperature  
decreased Body temperature increased Borderline personality  
disorder Bradycardia Bradyphrenia Brain oedema Breast  
disorder Breast pain Breast swelling Bronchitis Bronchospasm  
Candidiasis Carbon dioxide increased Cardiac arrest  
Cardiac disorder Cardiac failure Cardio-respiratory arrest  
Cardiovascular disorder Cellulitis Cerebellar syndrome  
Chest discomfort Chest pain Chills Choking sensation  
Chorea Chromaturia Clonic convulsion Clonus Clumsiness  
Coagulopathy Cognitive disorder Coma Completed suicide  
Confusional state Connective tissue disorder Constipation  
Conversion disorder Convulsion Coordination abnormal Cough  
Cyanosis Cystitis Cystitis noninfective Cytolytic  
hepatitis Deafness Death Decreased appetite Dehydration  
Delirium Delirium tremens Delusion Dependence  
Depersonalisation Depressed level of consciousness Depressed

mood Depression Depressive symptom Derealisation Dermatitis  
Dermatitis contact Dermatitis exfoliative Diarrhoea  
Diplopia Discomfort Disinhibition Disorientation  
Disturbance in attention Disturbance in sexual arousal  
Dizziness Drooling Drug abuse Drug dependence Drug  
eruption Drug intolerance Drug withdrawal convulsions Dry mouth  
Dry skin Dysaesthesia Dysarthria Dysgeusia Dyskinesia  
Dysmenorrhoea Dyspepsia Dysphagia Dysphonia Dysphoria  
Dyspnoea Dysthymic disorder Dystonia Dysuria Ear  
infection Ear pain Ecchymosis Effusion Ejaculation delayed  
Ejaculation failure Emotional disorder Emotional  
distress Emotional poverty Encephalopathy Encopresis Endometrial  
sarcoma Energy increased Enterocolitis Enuresis  
Eosinophilia Epilepsy Epistaxis Erectile dysfunction  
Erythema Erythema multiforme Euphoric mood  
Extrapyramidal disorder Extrasystoles Eye disorder  
Eye irritation Eye movement disorder Eye pain Eye  
swelling Face oedema Faecal incontinence Fatigue Feeling  
abnormal Feeling cold Feeling drunk Feeling hot Feeling  
jittery Feeling of body temperature change Flat affect Flatulence  
Floppy infant Flushing Fungal infection Gait disturbance  
Galactorrhoea Gangrene Gastric disorder Gastritis  
Gastrointestinal disorder Gastrointestinal haemorrhage  
Gastrointestinal pain Gingival pain Glossitis Glossodynia  
Gout Grand mal convulsion Gynaecomastia Haematoma  
Haematuria Haemoglobin Haemoglobin decreased Haemorrhage  
Haemorrhage urinary tract Haemorrhoids Hallucination  
Hangover Headache Hearing impaired Heart rate irregular  
Hemiparesis Hepatic enzyme increased Hepatic failure  
Hepatic function abnormal Hepatitis Hepatocellular injury  
Hepatomegaly Herpes simplex Herpes virus infection  
Hiccups Hirsutism Homicidal ideation Hordeolum  
Hostility Hunger Hypercapnia Hyperhidrosis  
Hyperkinesia Hyperprolactinaemia Hypersensitivity  
Hypersomnia Hypertension Hypertonia Hyperventilation  
Hypoaesthesia Hypochromic anaemia Hypokinesia Hypomania  
Hyponatraemia Hypopnoea Hyporeflexia Hypotension  
Hypothermia Hypotonia Hypoventilation Hypoxia Ill-defined  
disorder Illusion Inappropriate antidiuretic hormone secretion  
Incontinence Increased appetite Induration Infection  
Infectious mononucleosis Infestation Inflammation  
Influenza Injection site pain Injection site reaction  
Insomnia Intraocular pressure increased Irritability  
Jaundice Joint swelling Laryngitis Laryngospasm  
Lethargy Leukocytosis Leukopenia Libido decreased  
Libido increased Liver function test abnormal Liver injury  
Local reaction Logorrhoea Loss of consciousness Loss of  
libido Lung disorder Lymphadenopathy Major depression  
Malaise Mania Mean arterial pressure Mediastinal disorder  
Melaena Memory impairment Menstrual disorder  
Menstruation irregular Mental disability Mental disorder  
Mental retardation Micturition urgency Migraine  
Miosis Mood swings Motion sickness Movement disorder  
Muscle relaxant therapy Muscle rigidity Muscle spasms  
Muscle spasticity Muscle twitching Muscular weakness

Musculoskeletal discomfort Musculoskeletal disorder  
 Musculoskeletal stiffness Myalgia Mydriasis Myoclonus  
 Nasal congestion Nasopharyngitis Nausea Neck pain  
 Necrosis Nervous system disorder Nervousness Neuritis  
 Neuroleptic malignant syndrome Neuropathy peripheral  
 Neutropenia Nightmare Nocturia Nodal rhythm Nodule  
 Nystagmus Obstruction Obstructive airways disorder Oedema  
 Oedema peripheral Oliguria Oropharyngeal pain Orthostatic  
 hypotension Osteoarthritis Otitis media Pain Pain in extremity  
 Pain in jaw Pallor Palpitations Pancytopenia  
 Paraesthesia Paraesthesia oral Paralysis Paresis  
 Pelvic pain Penile discharge Pericardial effusion Periorbital  
 oedema Personality disorder Phaeochromocytoma Pharyngitis  
 Phlebitis Photophobia Photosensitivity reaction  
 Pigmentation disorder Platelet count decreased Pleurisy  
 Pneumonia Pneumothorax Pollakiuria Polyuria Post-  
 traumatic stress disorder Precocious puberty Premenstrual  
 syndrome Presyncope Proctalgia Prothrombin level increased  
 Pruritus Psychomotor retardation Psychotic disorder  
 Puberty Pulmonary congestion Pulmonary function test  
 decreased Pulmonary haemorrhage Pulmonary hypertension Pulmonary  
 oedema Purpura Rash Rash maculo-papular Rectal  
 haemorrhage Rectal tenesmus Renal failure Respiratory arrest  
 Respiratory depression Respiratory disorder Respiratory  
 failure Respiratory moniliasis Respiratory rate decreased  
 Respiratory tract congestion Respiratory tract infection  
 Retching Retrograde amnesia Rhinitis allergic Rhinorrhoea  
 Rhonchi Salivary hypersecretion Scotoma Sedation  
 Sexual dysfunction Shock Sinus tachycardia Sinusitis Skin  
 burning sensation Skin discolouration Skin disorder Skin  
 exfoliation Skin necrosis Sleep apnoea syndrome Sleep disorder  
 Sleep talking Sluggishness Sneezing Somnambulism  
 Somnolence Speech disorder Stevens-Johnson syndrome  
 Stomatitis Strabismus Stridor Stupor Substance abuse  
 Suicidal ideation Swelling Swelling face Swollen tongue  
 Syncope Tachycardia Tachypnoea Tenderness Tendonitis  
 Tension Therapeutic response decreased Thinking abnormal  
 Thirst Thrombocytopenia Thrombocytosis Thrombophlebitis  
 Thrombosis Thyroid neoplasm Tinnitus Tongue coated  
 Tongue disorder Tongue oedema Tooth disorder Toothache  
 Toxic epidermal necrolysis Transaminases increased  
 Tremor Tropical spastic paresis Ulcer Upper airway  
 obstruction Upper respiratory tract infection Urethral disorder  
 Urinary hesitation Urinary incontinence Urinary retention  
 Urinary tract disorder Urinary tract infection Urine  
 colour abnormal Urine output increased Urticaria Vaginal discharge  
 Vaginal infection Vaginal inflammation Vascular purpura  
 Vasodilation procedure Venous thrombosis Ventricular arrhythmia  
 Ventricular extrasystoles Vertigo Viral infection  
 Vision blurred Visual acuity reduced Visual impairment  
 Vomiting Weight decreased Weight increased Wheezing  
 Withdrawal syndrome Xeroderma Xerophthalmia Yawning

\*\*\*\*\*  
 \*\*\*\*\*

Tyrosine-protein phosphatase non-receptor type 11 - Group: Enzyme

Treated with:  
dodecane-trimethylamine: experimental small molecule (0 associated side effects)

known side effects mediated through drugs targeting this protein:

\*\*\*\*\*  
\*\*\*\*\*

Sodium channel protein type 10 subunit alpha - Group: Channel

Treated with:

lidocaine: approved small molecule (120 associated side effects) For production of local or regional anesthesia by infiltration techniques such as percutaneous injection and intravenous regional anesthesia by peripheral nerve block techniques such as brachial plexus and intercostal and by central neural techniques such as lumbar and caudal epidural blocks.

ropivacaine: approved small molecule (199 associated side effects) Used in obstetric anesthesia and regional anesthesia for surgery.

bupivacaine: approved small molecule (137 associated side effects) For the production of local or regional anesthesia or analgesia for surgery, for oral surgery procedures, for diagnostic and therapeutic procedures, and for obstetrical procedures.

hexylcaine: approved small molecule (0 associated side effects) Used as a local anesthetic for surface application, infiltration or nerve block

dibucaine: approved small molecule (0 associated side effects) For production of local or regional anesthesia by infiltration techniques such as percutaneous injection and intravenous regional anesthesia by peripheral nerve block techniques such as brachial plexus and intercostal and by central neural techniques such as lumbar and caudal epidural blocks.

dyclonine: approved small molecule (0 associated side effects) Used to provide topical anesthesia of accessible mucous membranes prior to examination, endoscopy or instrumentation, or other procedures involving the esophagus, larynx, mouth, pharynx or throat, respiratory tract or trachea, urinary tract, or vagina. Also used to suppress the gag reflex and/or other laryngeal and esophageal reflexes to facilitate dental examination or procedures (including oral surgery), endoscopy, or intubation. Also used for relief of canker sores, cold sores or fever blister.

procaine: approved small molecule (43 associated side effects) Used as a local anesthetic primarily in oral surgery

proparacaine: approved small molecule (11 associated side effects) Used as a local (ophthalmic) anesthetic.

oxybuprocaine: approved small molecule (0 associated side effects) Used to temporarily numb the front surface of the eye so that the eye pressure can be measured or a foreign body removed.

cocaine: illicit, approved small molecule (13 associated side effects) For the introduction of local (topical) anesthesia of accessible mucous membranes of the oral, laryngeal and nasal cavities.

mepivacaine: approved small molecule (59 associated side effects) For production of local or regional analgesia and

anesthesia by local infiltration, peripheral nerve block techniques, and central neural techniques including epidural and caudal blocks.

levobupivacaine: approved small molecule (0 associated side effects) For the production of local or regional anesthesia for surgery and obstetrics, and for post-operative pain management

benzocaine: approved small molecule (10 associated side effects)

For general use as a lubricant and topical anesthetic on esophagus, larynx, mouth, nasal cavity, rectum, respiratory tract or trachea, urinary tract, vagina. It is also used to suppress gag reflex.

chloroprocaine: approved small molecule (34 associated side effects) For the production of local anesthesia by infiltration and peripheral nerve block. They are not to be used for lumbar or caudal epidural anesthesia.

orphenadrine: approved small molecule (28 associated side effects) Indicated for the treatment of Parkinson's disease.

304 known side effects mediated through drugs targeting this protein:

Abdominal discomfort Abdominal distension Abdominal pain  
Abnormal labour Abscess Acidosis Acute coronary  
syndrome Affect lability Agitation Alanine aminotransferase  
increased Albuminuria Amnesia Anaemia Anal haemorrhage  
Anaphylactic shock Anaphylactoid reaction Angioedema  
Angiopathy Anorectal discomfort Anorectal disorder  
Anterior spinal artery syndrome Anxiety Aortic dissection  
Apgar score low Aplastic anaemia Apnoea Application site  
reaction Arachnoiditis Arrhythmia Arthralgia Aspartate  
aminotransferase increased Asthenia Atelectasis Atrial  
fibrillation Atrial flutter Atrioventricular block Back pain  
Blister Blood alkaline phosphatase increased Blood  
creatine phosphokinase increased Blood creatinine increased Blood  
pressure increased Blood urea decreased Body temperature  
decreased Body temperature increased Bradycardia Bradycardia  
foetal Brain hypoxia Breast disorder Bronchospasm  
Burning sensation Carbon dioxide increased Cardiac arrest  
Cardiac disorder Cardiac fibrillation Cardiac flutter  
Cardiac output decreased Cauda equina syndrome  
Cerebrovascular accident Chest pain Chills Cold sweat  
Coma Confusional state Conjunctival hyperaemia  
Constipation Convulsion Cough Cranial nerve paralysis  
Cyanosis Death Decreased appetite Deep vein thrombosis  
Depressed level of consciousness Dermatitis Dermatitis  
bullous Dermatitis contact Diarrhoea Diplegia Diplopia  
Discomfort Disease progression Disorientation Dizziness  
Dizziness postural Drug hypersensitivity Dry mouth  
Dysarthria Dyschezia Dysgeusia Dyskinesia Dyspepsia  
Dyspnoea Dysuria Effusion Electrocardiogram ST segment  
Embolism Endocrine disorder Erythema Euphoric mood  
Extradural abscess Extrasystoles Extravasation Eye  
disorder Eyelid ptosis Faecal incontinence Feeling abnormal  
Feeling hot Fever neonatal Fluid overload Flushing  
Foetal distress syndrome Foetor hepaticus Fungal infection  
Gastrointestinal disorder Gastrointestinal pain Gingivitis  
Haematoma Haematuria Haemoglobin Haemorrhage Haemorrhagic



anaemia      Hallucination      Headache      Hepatic function abnormal  
 Hepatocellular injury      Hernia      Hormone level abnormal  
 Hyperacusis      Hyperaemia      Hyperaesthesia      Hypercapnia  
 Hyperglycaemia      Hyperhidrosis      Hypersensitivity  
 Hypertension      Hyperthermia      Hypoaesthesia oral  
 Hypocalcaemia      Hypoglycaemia      Hypoglycaemia neonatal  
 Hypokalaemia      Hypokinesia      Hypomagnesaemia      Hypoproteinaemia  
 Hypotension      Hypothermia      Hypotonia      Hypoxia      Ill-defined  
 disorder      Immune system disorder      Incontinence      Infarction  
 Infection      Infestation      Inflammation      Injection site  
 inflammation      Injection site pain      Injection site reaction  
 Insomnia      Iritis      Jaundice      Jaundice neonatal      Keratitis  
 Lacrimation increased      Laryngeal oedema      Laryngospasm  
 Lethargy      Leukocytosis      Leukoderma      Liver disorder      Local  
 reaction      Loss of consciousness      Maculopathy      Malaise      Meningism  
 Meningitis      Meningitis aseptic      Mental disorder      Metabolic  
 disorder      Methaemoglobinaemia      Micturition disorder      Miosis  
 Monoplegia      Mood swings      Muscle relaxant therapy      Muscle  
 rigidity      Muscle spasms      Muscle twitching      Muscular weakness  
 Musculoskeletal discomfort      Musculoskeletal stiffness  
 Myalgia      Mydriasis      Myocardial depression      Myocardial  
 infarction      Nausea      Neck pain      Necrosis      Neonatal disorder  
 Neonatal infection      Nervous system disorder      Nervousness  
 Neuropathy peripheral      Nightmare      Nuchal rigidity      Obstruction  
 Oedema      Oedema peripheral      Oliguria      Optic nerve disorder  
 Oropharyngeal discomfort      Oropharyngeal pain      Orthostatic  
 hypotension      Osteoarthritis      Oxygen saturation decreased      Pain  
 Pallor      Palpitations      Papule      Paraesthesia oral  
 Paralysis      Paraplegia      Paresis      Petechiae      Phlebitis  
 Pleural disorder      Pleural effusion      Post procedural complication  
 Postpartum haemorrhage      Presyncope      Procedural pain      Proctalgia  
 Prothrombin level decreased      Prurigo      Pruritus      Pruritus  
 generalised      Pseudocholinesterase deficiency      Pulmonary embolism  
 Pulmonary function test decreased      Purpura      Pyuria      Rales  
 Rash      Rectal discharge      Rectal tenesmus      Respiratory arrest  
 Respiratory depression      Respiratory disorder      Respiratory  
 distress      Respiratory failure      Respiratory paralysis      Retinitis  
 pigmentosa      Rhinitis      Senile ankylosing vertebral hyperostosis  
 Sensitisation      Sensory loss      Shock      Sinus bradycardia      Skin  
 disorder      Skin exfoliation      Sneezing      Somnolence      Stomatitis  
 Stupor      Supraventricular extrasystoles      Swelling face  
 Syncope      Tachycardia      Tachycardia foetal      Tachypnoea  
 Tension      Teratogenicity      Therapeutic response unexpected  
 Thrombocytopenia      Thrombocytosis      Thrombosis      Tinnitus  
 Tremor      Ulcer      Urethral disorder      Urinary hesitation  
 Urinary incontinence      Urinary retention      Urinary tract disorder  
 Urinary tract infection      Urine abnormality      Urine analysis  
 abnormal      Urticaria      Uterine atony      Uterine hypotonus  
 Uterovaginal prolapse      Vascular purpura      Vasoconstriction  
 Vasodilation procedure      Venous thrombosis      Ventricular  
 extrasystoles      Ventricular fibrillation      Ventricular  
 tachycardia      Vertigo      Vision blurred      Visual impairment      Vomiting  
 Vomiting neonatal

\*\*\*\*\*  
 \*\*\*\*\*

Monocarboxylate transporter 2 - Group: Transporter

Treated with:

pyruvic acid: approved, nutraceutical small molecule (0 associated side effects) For nutritional supplementation, also for treating dietary shortage or imbalance

probenecid: approved small molecule (27 associated side effects) For the reduction of serum uric acid concentrations in chronic gouty arthritis and tophaceous gout in patients with frequent disabling gout attacks. Has also been effectively used to promote uric acid excretion in hyperuricemia secondary to the administration of thiazide and related diuretics.

gamma hydroxybutyric acid: illicit, approved small molecule (0 associated side effects) Used as a general anesthetic, to treat conditions such as insomnia, clinical depression, narcolepsy, and alcoholism, and to improve athletic performance.

acetoacetic acid: experimental small molecule (0 associated side effects)

d-lactic acid: experimental small molecule (0 associated side effects)

alpha-ketoisovalerate: experimental small molecule (0 associated side effects)

quercetin: experimental small molecule (0 associated side effects)

6-deoxyglucose: experimental small molecule (0 associated side effects)

niflumic acid: approved small molecule (0 associated side effects) Used in the treatment of rheumatoid arthritis.

27 known side effects mediated through drugs targeting this protein:  
Abdominal pain Alopecia Anaemia Anaphylactic shock  
Aplastic anaemia Body temperature increased Decreased  
appetite Dermatitis Dizziness Flushing Gingival pain  
Haematuria Haemolytic anaemia Headache Hepatic necrosis  
Hypersensitivity Leukopenia Nausea Necrosis Nephrotic  
syndrome Pain Pollakiuria Pruritus Renal colic Tenderness  
Urticaria Vomiting

\*\*\*\*\*  
\*\*\*\*\*

Outer membrane usher protein papC - Group: Transporter

Treated with:

lauryl dimethylamine-n-oxide: experimental small molecule (0 associated side effects)

(hydroxyethyloxy)tri(ethyloxy)octane: experimental small molecule (0 associated side effects)

known side effects mediated through drugs targeting this protein:

\*\*\*\*\*  
\*\*\*\*\*

Neuropeptide Y receptor type 2 - Group: Receptor

Treated with:

cysteamine: approved small molecule (0 associated side effects)  
Given intravenously or orally to treat radiation sickness. The bitartrate has been used for the oral treatment of nephropathic cystinosis and cystinurea.

known side effects mediated through drugs targeting this protein:

\*\*\*\*\*  
\*\*\*\*\*

5-hydroxytryptamine 1A receptor - Group: Receptor

Treated with:

eletriptan: approved small molecule (242 associated side effects) For the acute treatment of migraine with or without aura in adults.

ziprasidone: approved small molecule (251 associated side effects) For the treatment of schizophrenia and related psychotic disorders.

methysergide: approved small molecule (69 associated side effects) For the treatment of vascular headache

cabergoline: approved small molecule (96 associated side effects) For the treatment of hyperprolactinemic disorders, either idiopathic or due to prolactinoma (prolactin-secreting adenomas). May also be used to manage symptoms of Parkinsonian Syndrome as monotherapy during initial symptomatic management or as an adjunct to levodopa therapy during advanced stages of disease.

ropinirole: approved small molecule (631 associated side effects) For the treatment of the signs and symptoms of idiopathic Parkinson's disease. Also used for the treatment of restless legs syndrome.

zolmitriptan: approved small molecule (241 associated side effects) For the acute treatment of adult migraine with or without auras.

amitriptyline: approved small molecule (109 associated side effects) For the treatment of depression, chronic pain, irritable bowel syndrome, sleep disorders, diabetic neuropathy, agitation and insomnia, and migraine prophylaxis.

olanzapine: approved small molecule (393 associated side effects) For the acute and maintenance treatment of schizophrenia and related psychotic disorders, as well as acute treatment of manic or mixed episodes of bipolar 1 disorder. Intramuscular olanzapine is indicated for the rapid control of agitated patients.

clozapine: approved small molecule (228 associated side effects) For use in patients with treatment-resistant schizophrenia.

pramipexole: approved small molecule (620 associated side effects) For the treatment of signs and symptoms of idiopathic Parkinson's disease

chlorpromazine: approved small molecule (111 associated side effects) For the treatment of schizophrenia, control nausea and vomiting, For relief of restlessness and apprehension before surgery, adjunct in the treatment of tetanus, control the manifestations of the manic type of manic-depressive illness.

bupirone: approved small molecule (147 associated side effects) For the management of anxiety disorders or the short-term relief of the symptoms of anxiety, and also as an augmentation of SSRI-treatment against depression.

nortriptyline: approved small molecule (91 associated side effects) For the treatment of depression, chronic pain, irritable

bowel syndrome, sleep disorders, diabetic neuropathy, agitation and insomnia, and migraine prophylaxis.

propranolol: approved small molecule (96 associated side effects) For the prophylaxis of migraine.

lisuride: approved small molecule (0 associated side effects)  
For the management of Parkinson's Disease

trazodone: approved small molecule (194 associated side effects) For the treatment of depression.

sumatriptan: approved small molecule (317 associated side effects) For the treatment of migraine attacks with or without aura.

apomorphine: approved small molecule (45 associated side effects) For the acute, intermittent treatment of hypomobility, off episodes (end-of-dose wearing off and unpredictable on/off episodes) associated with advanced Parkinson's disease.

trimipramine: approved small molecule (0 associated side effects) For the treatment of depression and depression accompanied by anxiety, agitation or sleep disturbance

risperidone: approved small molecule (532 associated side effects) For the treatment of schizophrenia in adults and in adolescents, ages 13 to 17, and for the short-term treatment of manic or mixed episodes of bipolar I disorder in children and adolescents ages 10 to 17. May also be used to manage symptoms of inappropriate behavior due to aggression and/or psychosis in patients with severe dementia.

alprenolol: approved small molecule (0 associated side effects)  
For the treatment of hypertension, angina, and arrhythmia

ondansetron: approved small molecule (122 associated side effects) For the prevention of nausea and vomiting associated with emetogenic cancer chemotherapy, postoperation, and radiation. Also used for the treatment of postoperative nausea and vomiting.

naratriptan: approved small molecule (185 associated side effects) For the acute treatment of migraine attacks with or without aura in adults.

pindolol: approved small molecule (95 associated side effects)  
For the management of hypertension, edema, ventricular tachycardias, and atrial fibrillation.

ergoloid mesylate: approved small molecule (0 associated side effects) For use as an adjunct therapy for patients with dementia

doxepin: approved small molecule (210 associated side effects) Labeled indications: depression and insomnia. Unlabeled indications: chronic and neuropathic pain, anxiety, idiopathic urticaria.

nefazodone: approved, withdrawn small molecule (246 associated side effects) For the treatment of depression.

pergolide: approved, withdrawn small molecule (354 associated side effects) Indicated as adjunctive treatment to levodopa/carbidopa in the management of the signs and symptoms of Parkinson's disease. It was withdrawn from the US and Canadian markets in 2007 due to an increased risk of cardiac valvulopathy.

bromocriptine: approved small molecule (120 associated side effects) For the treatment of galactorrhea due to hyperprolactinemia, prolactin-dependent menstrual disorders and infertility, prolactin-secreting adenomas, prolactin-dependent male

hypogonadism, as adjunct therapy to surgery or radiotherapy for acromegaly or as monotherapy in special cases, as monotherapy in early Parkinsonian Syndrome or as an adjunct with levodopa in advanced cases with motor complications. Bromocriptine has also been used off-label to treat restless legs syndrome and neuroleptic malignant syndrome.

quetiapine: approved small molecule (359 associated side effects) For the treatment of schizophrenia and related psychotic disorders.

aripiprazole: approved small molecule (630 associated side effects) For the treatment of schizophrenia and related psychotic disorders.

paliperidone: approved small molecule (216 associated side effects) For the treatment of schizophrenia.

yohimbine: approved small molecule (0 associated side effects)  
Indicated as a sympatholytic and mydriatic. Impotence has been successfully treated with yohimbine in male patients with vascular or diabetic origins and psychogenic origins.

acepromazine: approved small molecule (0 associated side effects) Acepromazine was first used in humans in the 1950s as an antipsychotic agent. It is now rarely used in humans. Acepromazine is frequently used in animals as a sedative and antiemetic. Its principal value is in quietening and calming anxious animals.

alverine: approved small molecule (0 associated side effects)

Used to relieve cramps or spasms of the stomach and intestines. It is also useful in treating irritable bowel syndrome (IBS) and similar conditions. It can also be used to help relieve period pain. Alverine citrate is also under investigation to increase the cytotoxic effects of the proteasome inhibitor MG132 on breast cancer cells.

molindone: approved small molecule (46 associated side effects)

Molindone is used for the management of the manifestations of psychotic disorders.

pipotiazine: approved small molecule (94 associated side effects) For the maintenance treatment of chronic non-agitated schizophrenic patients.

thiopropazine: approved small molecule (0 associated side effects) For the treatment of all types of acute and chronic schizophrenia, including those which did not respond to the usual neuroleptics; manic syndromes.

rotigotine: approved small molecule (93 associated side effects)

For use/treatment in neurologic disorders and parkinson's disease as well as moderate-to-severe primary Restless Legs Syndrome.

vilazodone: approved small molecule (0 associated side effects)

Vilazodone is approved for treatment of acute episodes of major depression. Labeling of vilazodone describes an increased risk of suicidal thoughts in children, adolescents and young adults. The use of vilazodone in pediatric patients is not indicated. Its use with monoamine oxidase inhibitors (MAOI) is contraindicated due to increased risk of serotonin syndrome. Once the MAOI is discontinued, a 14-day washout period must pass before starting vilazodone.

bopindolol: approved small molecule (0 associated side effects)

For the management of hypertension, edema, ventricular tachycardias, and atrial fibrillation.

cinitapride: approved small molecule (0 associated side effects) For the treatment of gastrointestinal disorders associated with motility disturbances such as gastroesophageal reflux disease, non-ulcer dyspepsia and delayed gastric emptying.

1384 known side effects mediated through drugs targeting this protein:

Abasia Abdominal adhesions Abdominal discomfort Abdominal distension Abdominal neoplasm Abdominal pain Abdominal pain lower Abdominal pain upper Abdominal tenderness Abnormal behaviour Abnormal dreams Abnormal faeces Abortion spontaneous Abscess Accommodation disorder Acidosis Acne Actinic keratosis Acute abdomen Acute coronary syndrome Acute lymphocytic leukaemia Acute psychosis Acute tonsillitis Adenocarcinoma Adenoma benign Adhesion Adjustment disorder Adverse reaction Affect lability Affective disorder Ageusia Aggression Agitation Agoraphobia Agranulocytosis Akathisia Akinesia Alanine aminotransferase increased Albright's disease Albuminuria Alcohol abuse Alcohol intolerance Alkalosis Alopecia Altered state of consciousness Amaurosis fugax Amblyopia Amenorrhoea Amnesia Anaemia Anaemia macrocytic Anaemia megaloblastic Anaphylactic shock Anaphylactoid reaction Aneurysm Anger Angina pectoris Angina unstable Angioedema Angiomyolipoma Angiopathy Angle closure glaucoma Anorectal discomfort Anorectal disorder Anorgasmia Antibody test positive Antidiuretic hormone abnormality Antinuclear antibody positive Antisocial behaviour Antisocial personality disorder Anxiety Aortic aneurysm Aortic dissection Aortic embolus Apathy Aphasia Aphonia Aphthous stomatitis Aplastic anaemia Apnoea Appendicitis Application site reaction Apraxia Arrhythmia Arrhythmia supraventricular Arterial disorder Arterial insufficiency Arterial occlusive disease Arterial stenosis Arterial thrombosis Arteriosclerosis Arteriospasm coronary Arteritis Arthralgia Arthritis Arthropathy Ascites Asocial behaviour Aspartate aminotransferase increased Asphyxia Aspiration Asthenia Asthma Ataxia Atelectasis Atrial fibrillation Atrial flutter Atrial septal defect Atrioventricular block Atrioventricular block first degree Atrioventricular block second degree Atrophy Aura Automatism Azotaemia Back pain Bacterial infection Balance disorder Balanoposthitis Basal cell carcinoma Basophilia Benign intracranial hypertension Benign neoplasm Benign neoplasm of skin Benign prostatic hyperplasia Biliary colic Binge eating Bladder cancer Bladder disorder Bladder pain Blepharitis Blepharospasm Blindness Blindness transient Blister Blood alkaline phosphatase increased Blood amylase increased Blood antidiuretic hormone abnormal Blood bilirubin abnormal Blood bilirubin increased Blood cholesterol increased Blood creatine phosphokinase increased Blood creatinine increased Blood disorder Blood electrolytes abnormal Blood glucose decreased Blood glucose increased Blood insulin increased Blood iron decreased Blood lactate dehydrogenase increased Blood phosphorus increased Blood potassium decreased Blood potassium increased Blood pressure

abnormal Blood pressure diastolic decreased Blood pressure  
 fluctuation Blood pressure increased Blood pressure systolic  
 decreased Blood prolactin increased Blood testosterone decreased  
 Blood triglycerides increased Blood triglycerides normal  
 Blood urea increased Blood uric acid increased Blood urine  
 Blood urine present Blunted affect Body temperature  
 decreased Body temperature increased Bone disorder Bone  
 neoplasm Bone pain Bone sarcoma Bradycardia Bradykinesia  
 Bradyphrenia Brain neoplasm Brain neoplasm benign Brain  
 oedema Breast cancer Breast cyst Breast discharge Breast  
 discomfort Breast disorder Breast disorder female Breast disorder  
 male Breast engorgement Breast enlargement Breast feeding  
 Breast neoplasm Breast pain Breast swelling Breast tenderness  
 Breath odour Bronchiolitis Bronchitis Bronchopneumonia  
 Bronchopneumopathy Bronchospasm Bruxism  
 Buccoglossal syndrome Bulimia nervosa Bundle branch block  
 Bundle branch block left Bundle branch block right  
 Burning sensation Bursitis Cachexia Calculus bladder  
 Calculus urinary Cancer in remission Candidiasis  
 Carbohydrate tolerance decreased Cardiac arrest Cardiac  
 disorder Cardiac failure Cardiac failure congestive Cardiac  
 fibrillation Cardiac flutter Cardiac murmur Cardiac output  
 decreased Cardiac septal defect Cardiac valve disease Cardio-  
 respiratory arrest Cardiomegaly Cardiomyopathy  
 Cardiopulmonary failure Cardiovascular disorder  
 Carotid artery occlusion Carpal tunnel syndrome Cataplexy  
 Cataract Catatonia Cells in urine Cellulitis Cerebral  
 artery embolism Cerebral atrophy Cerebral haemorrhage Cerebral  
 infarction Cerebral ischaemia Cerebrospinal fluid rhinorrhoea  
 Cerebrovascular accident Cerebrovascular disorder  
 Cervicitis Cervix carcinoma Chapped lips Cheilitis Chest  
 discomfort Chest pain Chills Choking Choking sensation  
 Cholecystitis Cholecystitis chronic Cholelithiasis  
 Cholestasis Chorea Choreoathetosis Chromaturia Chronic  
 lymphocytic leukaemia Chronic obstructive pulmonary disease  
 Claustrophobia Coagulopathy Coccydynia Cognitive  
 disorder Cogwheel rigidity Cold sweat Colitis ischaemic Colitis  
 ulcerative Colon cancer Colorectal cancer Coma Completed suicide  
 Compulsions Condition aggravated Confusional state Congenital  
 anomaly Congenital eye disorder Congenital foot malformation  
 Congenital genitourinary abnormality Conjunctival  
 haemorrhage Conjunctivitis Connective tissue disorder  
 Constipation Conversion disorder Convulsion  
 Coordination abnormal Corneal deposits Corneal lesion  
 Coronary artery disease Coronary artery insufficiency  
 Coronary artery occlusion Costochondritis Cough Crocodile  
 tears syndrome Crying Cyanosis Cystitis Cystitis  
 noninfective Cytolytic hepatitis Dandruff Deafness Death  
 Decreased appetite Decreased interest Decubitus ulcer  
 Deep vein thrombosis Deficiency anaemia Deformity  
 Dehydration Delirium Delusion Dementia Dementia with  
 Lewy bodies Dental caries Dependence Depersonalisation Depressed  
 level of consciousness Depressed mood Depression Depressive  
 symptom Derealisation Dermal cyst Dermatitis Dermatitis atopic  
 Dermatitis bullous Dermatitis contact Dermatitis

exfoliative Dermatitis infected Dermoid cyst Developmental  
 delay Diabetes mellitus Diabetic coma Diabetic hyperglycaemic coma  
 Diabetic hyperosmolar coma Diabetic ketoacidosis  
 Diaphragmatic hernia Diarrhoea Diarrhoea haemorrhagic  
 Diplegia Diplopia Discomfort Disease progression  
 Disorientation Disseminated intravascular coagulation  
 Dissociation Dissociative disorder Disturbance in  
 attention Disturbance in sexual arousal Diverticulitis  
 Dizziness Dizziness exertional Dizziness postural  
 Drooling Drug abuse Drug dependence Drug eruption Drug  
 hypersensitivity Drug ineffective Drug interaction Drug level  
 increased Drug withdrawal syndrome Drug withdrawal syndrome  
 neonatal Dry eye Dry mouth Dry skin Dry throat Duodenal  
 ulcer Duodenal ulcer haemorrhage Duodenitis Dysaesthesia  
 Dysarthria Dysentery Dysgeusia Dysgraphia Dyskinesia  
 Dysmenorrhoea Dyspepsia Dysphagia Dysphemia Dysphonia  
 Dysphoria Dyspnoea Dyspnoea exertional Dysthymic  
 disorder Dystonia Dysuria Ear disorder Ear infection  
 Ear pain Ecchymosis Eclampsia Eczema Effusion  
 Ejaculation delayed Ejaculation disorder Ejaculation  
 failure Elastosis perforans Elderly Electrocardiogram PR  
 interval Electrocardiogram PR prolongation Electrocardiogram QRS  
 complex Electrocardiogram QT prolonged Electrocardiogram ST  
 segment depression Electrocardiogram ST segment elevation  
 Electrocardiogram T wave inversion Electrocardiogram abnormal  
 Electrocardiogram change Electroencephalogram abnormal  
 Electrolyte imbalance Elevated mood Embolism Emotional  
 distress Emphysema Encephalopathy Endocrine disorder  
 Endometrial cancer Endometrial neoplasm Endometriosis  
 Energy increased Enteritis Enuresis Enzyme abnormality  
 Eosinophil count increased Eosinophilia Epicondylitis  
 Epididymitis Epilepsy Epistaxis Erectile dysfunction  
 Eructation Erythema Erythema multiforme Erythromelalgia  
 Euphoric mood Exfoliative rash Exostosis Extrapyrmidal  
 disorder Extrasystoles Eye discharge Eye disorder Eye  
 haemorrhage Eye infection Eye inflammation Eye irritation Eye  
 movement disorder Eye oedema Eye pain Eye pruritus Eye  
 swelling Eyelid disorder Eyelid function disorder Eyelid  
 oedema Eyelid ptosis Face oedema Facial pain Facial paresis  
 Faecal incontinence Faecalith Faecaloma Faeces  
 discoloured Faeces hard Fallopiian tube disorder Fasciitis  
 Fasting Fatigue Fear Feeling abnormal Feeling cold  
 Feeling hot Feeling jittery Feeling of body temperature change  
 Female sexual dysfunction Fibroadenoma of breast Fibrocystic  
 breast disease Fibrosis Flank pain Flat affect Flatulence Fluid  
 overload Fluid retention Flushing Foetor hepaticus  
 Folliculitis Formication Fungal infection Fungal skin  
 infection Furuncle Gait disturbance Galactorrhoea Gallbladder  
 cancer Gallbladder disorder Gamma-glutamyltransferase  
 increased Gangrene Gastric cancer Gastric disorder Gastric  
 haemorrhage Gastric pH decreased Gastric polyps Gastric ulcer  
 Gastric ulcer haemorrhage Gastritis Gastritis haemorrhagic  
 Gastroenteritis Gastrointestinal carcinoma Gastrointestinal  
 disorder Gastrointestinal haemorrhage Gastrointestinal infection  
 Gastrointestinal neoplasm Gastrointestinal obstruction



Gastrointestinal pain Gastrointestinal stromal tumour  
 Gastrooesophageal reflux disease General symptom Generalised  
 oedema Genital candidiasis Genital discharge Genital disorder  
 female Genitourinary tract neoplasm Gestational hypertension  
 Gingival bleeding Gingival infection Gingival pain  
 Gingival recession Gingivitis Glaucoma Glossitis  
 Glossodynia Glucose tolerance decreased Glucose tolerance  
 impaired Glycosuria Glycosylated haemoglobin increased Goitre  
 Gout Grand mal convulsion Gravitational oedema Groin pain  
 Growth hormone deficiency Gynaecomastia Haemangioma  
 Haematemesis Haematochezia Haematocrit decreased  
 Haematoma Haematuria Haemoglobin Haemoglobin decreased  
 Haemoglobin increased Haemoglobinuria Haemolysis Haemolytic  
 anaemia Haemoptysis Haemorrhage Haemorrhage intracranial  
 Haemorrhage urinary tract Haemorrhagic disorder  
 Haemorrhoids Haemothorax Hair disorder Hallucination  
 Hallucination, auditory Hallucination, visual Hangover  
 Head discomfort Head titubation Headache Hearing impaired  
 Heart disease congenital Heart rate irregular Hemianopia  
 Hemiparesis Hemiplegia Hepatic cirrhosis Hepatic enzyme  
 increased Hepatic failure Hepatic function abnormal Hepatic  
 necrosis Hepatic neoplasm Hepatic neoplasm malignant Hepatic  
 steatosis Hepatitis Hepatitis A Hepatitis cholestatic  
 Hepatobiliary disease Hepatocellular injury Hepatomegaly  
 Hereditary disorder Hernia Herpes simplex Herpes  
 virus infection Herpes zoster Hiccups Hirsutism Homicidal  
 ideation Hordeolum Hormone level abnormal Hostility Hot flush  
 Hunger Hydrocephalus Hyperacusis Hyperaemia  
 Hyperaesthesia Hyperbilirubinaemia Hyperchloraemia  
 Hyperchlorhydria Hypercholesterolaemia Hyperglycaemia  
 Hyperhidrosis Hyperinsulinism Hyperkalaemia  
 Hyperkeratosis Hyperkinesia Hyperlipidaemia  
 Hypermagnesaemia Hypernatraemia Hyperparathyroidism  
 Hyperpathia Hyperphagia Hyperphosphataemia Hyperplasia  
 Hyperprolactinaemia Hyperpyrexia Hyperreflexia  
 Hypersensitivity Hypersexuality Hypersomnia Hypertension  
 Hypertensive crisis Hyperthermia Hyperthyroidism  
 Hypertonia Hypertonic bladder Hypertrichosis  
 Hypertriglyceridaemia Hypertrophy Hyperuricaemia  
 Hyperuricosuria Hyperventilation Hypervigilance  
 Hypoaesthesia Hypoaesthesia oral Hypocalcaemia  
 Hypochloraemia Hypocholesterolaemia Hypochromic anaemia  
 Hypoglycaemia Hypogonadism Hypohidrosis  
 Hypokalaemia Hypokinesia Hypomagnesaemia Hypomania  
 Hypomenorrhoea Hyponatraemia Hypophagia Hypoproteinaemia  
 Hyporeflexia Hypotension Hypothermia Hypothyroidism  
 Hypotonia Hypoventilation Hypovitaminosis Hypoxia  
 Idiopathic thrombocytopenic purpura Ileus paralytic Ill-  
 defined disorder Illusion Immobile Immune system disorder  
 Impaired healing Inappropriate antidiuretic hormone secretion  
 Incontinence Increased appetite Increased bronchial  
 secretion Increased tendency to bruise Induration Infarction  
 Infected cyst Infection Infestation Inflammation  
 Influenza Influenza like illness Inguinal hernia Initial  
 insomnia Injection site mass Injection site pain Injection

site reaction Inner ear disorder Insomnia Intention tremor  
 Intentional self-injury Intermittent claudication  
 Interstitial lung disease Intervertebral disc degeneration  
 Intervertebral disc disorder Intervertebral disc protrusion  
 Intervertebral discitis Intestinal functional disorder  
 Intestinal obstruction Intestinal perforation Intracranial  
 pressure increased Intraocular pressure increased Iron  
 deficiency Iron deficiency anaemia Irritability Irritable  
 bowel syndrome Ischaemia Ischaemic hepatitis Ischaemic stroke  
 Jaundice Jaundice cholestatic Joint contracture Joint  
 effusion Joint range of motion decreased Joint stiffness Joint  
 swelling Judgement impaired Keratitis Keratoconjunctivitis  
 sicca Keratopathy Ketoacidosis Ketonuria Ketosis Laboratory  
 test abnormal Labyrinthitis Lacrimal disorder Lacrimation  
 decreased Lacrimation increased Lactose intolerance Laryngeal  
 cancer Laryngeal disorder Laryngeal neoplasm Laryngeal  
 oedema Laryngitis Laryngospasm Left ventricular failure  
 Leiomyoma Lens disorder Lenticular opacities Lenticular  
 pigmentation Leriche syndrome Lethargy Leukaemia  
 Leukocytoclastic vasculitis Leukocytosis Leukoderma  
 Leukopenia Leukoplakia oral Libido decreased Libido increased  
 Lichenoid keratosis Lip and/or oral cavity cancer Lip  
 blister Lip dry Lip swelling Lipoatrophy Lipohypertrophy  
 Lipoma Livedo reticularis Liver disorder Liver  
 function test abnormal Liver injury Lividity Lobar pneumonia  
 Local reaction Localised infection Localised oedema  
 Logorrhoea Loss of consciousness Loss of libido Lower  
 respiratory tract infection Lung adenocarcinoma stage I Lung cancer  
 metastatic Lung disorder Lung infiltration Lung neoplasm  
 malignant Lymphadenitis Lymphadenopathy Lymphatic disorder  
 Lymphocytic leukaemia Lymphocytosis Lymphoedema Lymphoma  
 Lymphopenia Macular degeneration Macule Maculopathy Major  
 depression Malaise Male sexual dysfunction Malignant  
 melanoma Mania Masked facies Mass Mastitis Mediastinal  
 disorder Megacolon Melaena Melanocytic naevus Memory  
 impairment Meniere's disease Meningitis Menopausal symptoms  
 Menopause Menorrhagia Menstrual disorder Menstruation  
 delayed Menstruation irregular Mental disability Mental disorder  
 Mental retardation Mental status changes Mesenteric artery  
 thrombosis Metabolic alkalosis Metastasis Metastatic neoplasm  
 Methaemoglobinaemia Metrorrhagia Micturition disorder  
 Micturition urgency Middle ear disorder Middle ear  
 effusion Middle insomnia Migraine with aura Migraine without  
 aura Miosis Mitral valve incompetence Mobility decreased  
 Monarthrititis Monocytosis Monoplegia Mood swings Motion  
 sickness Motor dysfunction Mouth ulceration Movement disorder  
 Multiple myeloma Muscle atrophy Muscle contractions  
 involuntary Muscle contracture Muscle enzyme increased  
 Muscle fatigue Muscle relaxant therapy Muscle rigidity  
 Muscle spasms Muscle tightness Muscle twitching Muscular  
 weakness Musculoskeletal chest pain Musculoskeletal deformity  
 Musculoskeletal discomfort Musculoskeletal disorder  
 Musculoskeletal pain Musculoskeletal stiffness Myalgia  
 Myasthenic syndrome Mydriasis Myelitis Myocardial  
 infarction Myocardial ischaemia Myocarditis Myoclonus Myopathy

Myopia Myositis Nail discolouration Nail disorder  
 Nail infection Narcolepsy Nasal congestion Nasal disorder  
 Nasal dryness Nasal inflammation Nasal oedema Nasal  
 polyps Nasopharyngitis Nausea Neck pain Necrosis  
 Necrosis ischaemic Neoplasm Neoplasm malignant  
 Neoplasm prostate Neoplasm recurrence Neoplasm skin  
 Nephritis Nephrolithiasis Nephrotic syndrome Nerve root  
 lesion Nervous system disorder Nervousness Neuralgia  
 Neuritis Neurodermatitis Neurogenic bladder Neuroleptic  
 malignant syndrome Neurological symptom Neuroma Neuropathy  
 peripheral Neurosis Neutropenia Neutrophil count decreased  
 Neutrophil count increased Night blindness Night sweats  
 Nightmare Nocturia Nodal arrhythmia Nodule  
 Normochromic normocytic anaemia Nuchal rigidity Nystagmus  
 Obesity Obsessive thoughts Obstruction Obstructive  
 airways disorder Ocular hyperaemia Oculogyric crisis  
 Oculomucocutaneous syndrome Oedema Oedema peripheral  
 Oesophageal achalasia Oesophageal carcinoma Oesophageal  
 disorder Oesophageal spasm Oesophageal stenosis Oesophageal ulcer  
 Oesophagitis Oligomenorrhoea Oliguria Onychomycosis  
 Opisthotonus Optic ischaemic neuropathy Optic nerve  
 disorder Oral candidiasis Oral neoplasm benign Oral pain Oral  
 pruritus Orchitis noninfective Orgasm abnormal Oropharyngeal  
 discomfort Oropharyngeal pain Oropharyngeal spasm Orthostatic  
 hypotension Osteoarthritis Osteoarthropathy Osteodystrophy  
 Osteomyelitis Osteonecrosis Osteopenia Osteoporosis  
 Otitis externa Otitis media Otitis media chronic  
 Ovarian cancer Ovarian cyst Pain Pain in extremity Pain  
 in jaw Pain of skin Pallor Palpitations  
 Pancreatitis acute Pancytopenia Panic attack Panic  
 disorder Panic disorder with agoraphobia Panic reaction  
 Papilloma Paraesthesia Paraesthesia oral Paralysis  
 Paranoia Parasomnia Parathyroid disorder Parathyroid  
 tumour Paresis Parkinsonian gait Parkinsonism Paronychia  
 Parosmia Parotid gland enlargement Pathological fracture  
 Pathological gambling Pelvic inflammatory disease Pelvic pain  
 Penis disorder Peptic ulcer Pericardial effusion  
 Pericarditis constrictive Perineal pain Periodontitis  
 Periorbital oedema Peripheral coldness Peripheral  
 ischaemia Peripheral vascular disorder Peritoneal adhesions  
 Personality change Personality disorder Petechiae Petit  
 mal epilepsy Phaeochromocytoma Pharyngeal disorder Pharyngeal  
 erythema Pharyngeal haemorrhage Pharyngitis Phlebitis Phlebitis  
 superficial Phobia Phonological disorder Phonophobia Photophobia  
 Photopsia Photosensitivity allergic reaction Photosensitivity  
 reaction Pigmentation disorder Pituitary tumour Pituitary tumour  
 benign Plasmacytoma Platelet count decreased Pleural  
 disorder Pleural effusion Pleural fibrosis Pleurisy Pneumonia  
 Pneumonia aspiration Pneumothorax Poisoning  
 Poliomyelitis Pollakiuria Polycythaemia Polydipsia  
 Polymyalgia rheumatica Polyp Polyuria Post procedural  
 infection Postmenopausal haemorrhage Postural orthostatic  
 tachycardia syndrome Posture abnormal Pre-eclampsia Precocious  
 puberty Pregnancy test positive Premature ejaculation  
 Premenstrual syndrome Presyncope Priapism Prinzmetal angina

Proctalgia Productive cough Prolactinoma Prostate cancer  
 Prostatic adenoma Prostatic disorder Prostatitis Protein  
 urine present Proteinuria Protrusion tongue Prurigo Pruritus  
 Pruritus generalised Pruritus genital Pseudolymphoma  
 Psoriasis Psychiatric symptom Psychomotor retardation  
 Psychotic behaviour Psychotic disorder Puberty  
 Pulmonary congestion Pulmonary embolism Pulmonary  
 fibrosis Pulmonary hypertension Pulmonary oedema Pulse abnormal  
 Purpura Purpura non-thrombocytopenic Pyelonephritis  
 Pyoderma Pyuria Radiculopathy Rales Rash Rash  
 erythematous Rash generalised Rash maculo-papular Rash  
 papular Rash pustular Rash vesicular Raynaud's phenomenon  
 Rectal cancer Rectal haemorrhage Rectal tenesmus Red  
 blood cell count decreased Red blood cell sedimentation rate  
 increased Reflux oesophagitis Regressive behaviour  
 Regurgitation Renal artery stenosis Renal colic Renal cyst  
 Renal failure acute Renal impairment Renal neoplasm Renal  
 pain Respiration abnormal Respiratory alkalosis Respiratory  
 arrest Respiratory disorder Respiratory distress Respiratory  
 failure Respiratory tract congestion Respiratory tract infection  
 Respiratory tract infection viral Restless legs syndrome  
 Retching Retinal artery occlusion Retinal detachment  
 Retinal disorder Retinal vascular disorder Retinal vascular  
 occlusion Retinal vein thrombosis Retinitis pigmentosa  
 Retrograde ejaculation Retroperitoneal fibrosis  
 Rhabdomyolysis Rheumatoid arthritis Rhinitis Rhinitis  
 allergic Rhinitis seasonal Rhinorrhoea Rhonchi Rosacea  
 Rotator cuff syndrome Sacroiliitis Saliva altered  
 Salivary duct obstruction Salivary gland disorder  
 Salivary gland enlargement Salivary hypersecretion  
 Salpingitis Sarcoidosis Sarcoma Scab Schizoaffective  
 disorder Schizophrenia Schizophreniform disorder Sciatica  
 Scleral disorder Scotoma Seasonal allergy Seborrhoeic  
 dermatitis Seborrhoeic keratosis Sedation Sensation of heaviness  
 Sensation of pressure Sensory disturbance Sensory loss  
 Sepsis Septic shock Severe acute respiratory syndrome  
 Sexual dysfunction Shock Sialoadenitis Sicca syndrome  
 Sick sinus syndrome Sinus arrhythmia Sinus bradycardia Sinus  
 congestion Sinus disorder Sinus headache Sinus tachycardia  
 Sinusitis Skin burning sensation Skin cancer Skin  
 discolouration Skin disorder Skin exfoliation Skin  
 hyperpigmentation Skin hypertrophy Skin infection Skin irritation  
 Skin lesion Skin mass Skin odour abnormal Skin papilloma  
 Skin tightness Skin ulcer Skin wrinkling Sleep apnoea  
 syndrome Sleep attacks Sleep disorder Sleep paralysis Sleep  
 talking Sluggishness Small intestinal obstruction Sneezing  
 Snoring Social avoidant behaviour Somnambulism  
 Somnolence Speech disorder Spinal osteoarthritis Spine  
 malformation Splenic infarction Splenomegaly Spondylitis  
 Sputum increased Squamous cell carcinoma Status  
 epilepticus Stevens-Johnson syndrome Sticky skin Stomatitis  
 Stress Stridor Stupor Subarachnoid haemorrhage  
 Subcutaneous abscess Subcutaneous nodule Subdural  
 haematoma Substance abuse Sudden death Suicidal ideation  
 Suicide attempt Superior sagittal sinus thrombosis

Supraventricular extrasystoles      Supraventricular tachycardia  
 Surgery      Suspiciousness      Swelling      Swelling face  
 Swollen tongue      Syncope      Synostosis      Synovitis      Systemic  
 lupus erythematosus      Tachyarrhythmia      Tachycardia      Tachypnoea  
 Talipes      Tardive dyskinesia      Telangiectasia      Temperature  
 intolerance      Temporal arteritis      Tenderness      Tendinous contracture  
 Tendonitis      Tenosynovitis      Tension      Tension headache  
 Terminal insomnia      Testicular disorder      Testicular pain  
 Testicular swelling      Tetany      Therapeutic response  
 decreased      Therapeutic response increased      Thinking abnormal  
 Thirst      Thought blocking      Throat irritation      Throat tightness  
 Thrombocytopenia      Thrombocytopenic purpura      Thrombocytosis  
 Thrombophlebitis      Thrombosis      Thrombotic thrombocytopenic  
 purpura      Thyroid adenoma      Thyroid cancer      Thyroid neoplasm  
 Thyroiditis      Tic      Tinnitus      Tongue discolouration      Tongue  
 disorder      Tongue dry      Tongue oedema      Tongue paralysis      Tongue  
 spasm      Tongue ulceration      Tonsillar hypertrophy      Tonsillitis      Tooth  
 abscess      Tooth disorder      Tooth impacted      Tooth infection  
 Toothache      Torsade de pointes      Torticollis      Toxic epidermal  
 necrolysis      Tracheitis      Tracheobronchitis      Transaminases increased  
 Transient ischaemic attack      Tremor      Trismus      Tuberculin  
 test positive      Tubulointerstitial nephritis      Tunnel vision      Type  
 I hypersensitivity      Ulcer      Ulcer haemorrhage      Umbilical hernia  
 Unevaluable event      Unintended pregnancy      Unresponsive to  
 stimuli      Upper respiratory tract infection      Upper-airway cough  
 syndrome      Urethral disorder      Urethral pain      Urethritis      Urinary  
 hesitation      Urinary incontinence      Urinary retention      Urinary tract  
 disorder      Urinary tract infection      Urinary tract obstruction  
 Urine abnormality      Urine analysis abnormal      Urine output  
 increased      Urogenital disorder      Urosepsis      Urticaria      Uterine  
 disorder      Uterine haemorrhage      Uterine leiomyoma      Uterine neoplasm  
 Uterovaginal prolapse      VIIIth nerve paralysis      Vaginal discharge  
 Vaginal haemorrhage      Vaginal infection      Vaginal inflammation  
 Varicose vein      Vascular insufficiency      Vascular occlusion  
 Vascular purpura      Vasculitis      Vasoconstriction      Vasodilation  
 procedure      Vasospasm      Vein disorder      Venous thrombosis      Ventricular  
 arrhythmia      Ventricular extrasystoles      Ventricular failure  
 Ventricular fibrillation      Ventricular hypertrophy  
 Ventricular tachycardia      Vertigo      Vestibular ataxia  
 Vestibular disorder      Viral diarrhoea      Viral infection  
 Vision blurred      Visual acuity reduced      Visual impairment  
 Vitamin B12 deficiency      Vitreous detachment      Vitreous floaters  
 Vocal cord paralysis      Vomiting      Vulvovaginal candidiasis  
 Vulvovaginal dryness      Vulvovaginal mycotic infection  
 Vulvovaginal pruritus      Vulvovaginitis      Water intoxication  
 Weight decreased      Weight fluctuation      Weight increased  
 Wheezing      White blood cell count decreased      White blood cell  
 count increased      White blood cells urine positive      Withdrawal bleed  
 Withdrawal syndrome      Wound infection      Xerophthalmia  
 Xerosis      Yawning

\*\*\*\*\*  
 \*\*\*\*\*

Neuronal acetylcholine receptor subunit alpha-7 - Group: Channel  
 Treated with:

nicotine: approved small molecule (98 associated side effects)  
For the relief of nicotine withdrawal symptoms and as an aid to smoking cessation.

butabarbital: illicit,approved small molecule (0 associated side effects)  
For short-term treatment of insomnia and anxiety disorders

butalbital:illicit,approved small molecule (0 associated side effects)  
Used in combination with acetaminophen or aspirin and caffeine for its sedative and relaxant effects in the treatment of tension headaches, migraines, and pain.

talbutal: illicit,approved small molecule (0 associated side effects)  
For use as a sedative and hypnotic.

pentobarbital: approved small molecule (38 associated side effects)  
For the short-term treatment of insomnia.

secobarbital: approved small molecule (38 associated side effects)  
For the Short-term treatment of intractable insomnia for patients habituated to barbiturates

metharbital: approved small molecule (0 associated side effects)  
Metharbital is used for the treatment of epilepsy.

thiopental:approved small molecule (0 associated side effects)

For use as the sole anesthetic agent for brief (15 minute) procedures, for induction of anesthesia prior to administration of other anesthetic agents, to supplement regional anesthesia, to provide hypnosis during balanced anesthesia with other agents for analgesia or muscle relaxation, for the control of convulsive states during or following inhalation anesthesia or local anesthesia, in neurosurgical patients with increased intracranial pressure, and for narcoanalysis and narcosynthesis in psychiatric disorders.

galantamine: approved small molecule (160 associated side effects)  
For the treatment of mild to moderate dementia of the Alzheimer's type. Has also been investigated in patients with mild cognitive impairment who did not meet the diagnostic criteria for Alzheimer's disease.

primidone: approved small molecule (16 associated side effects)  
For the treatment of epilepsy

methylphenobarbital: approved small molecule (37 associated side effects)  
For the relief of anxiety, tension, and apprehension, also used as an anticonvulsant for the treatment of epilepsy.

varenicline: approved small molecule (285 associated side effects)  
For use as an aid in smoking cessation.

amobarbital: illicit,approved small molecule (0 associated side effects)

aprobarbital: illicit,approved small molecule (0 associated side effects)

butethal: illicit,approved small molecule (0 associated side effects)  
For the treatment of insomnia.

heptabarbital: approved small molecule (0 associated side effects)  
Used mainly for sedation and hypnosis.

hexobarbital: approved small molecule (0 associated side effects)  
For the induction of anesthesia prior to the use of other general anesthetic agents and for induction of anesthesia for short surgical, diagnostic, or therapeutic procedures associated with minimal painful stimuli.

barbituric acid derivative: illicit,experimental small molecule  
(0 associated side effects)

392 known side effects mediated through drugs targeting this protein:

Abdominal discomfort Abdominal pain Abnormal dreams Abnormal faeces Acne Acute coronary syndrome Affect lability Aggression Agitation Agranulocytosis Amnesia Anaemia Anaemia megaloblastic Anger Angina pectoris Angioedema Angiopathy Anxiety Aortic dissectionApathy Aphasia Aphthous stomatitis Aplasia Apnoea Apraxia Arrhythmia Arrhythmia supraventricular Arterial disorder Arthralgia Arthritis Asthenia Asthma Ataxia Atrial fibrillation Atrioventricular block Back pain Balance disorder Bladder disorder Bladder pain Blindness Blindness transient Blister Blood alkaline phosphatase increased Blood pressure increased Blood urea increased Body temperature increased Bone pain BradycardiaBradyphrenia Breast disorder Bronchitis Bronchospasm Bundle branch block Cardiac disorder Cardiac failure Cardiac fibrillation Cardiac flutter Cardiovascular disorder Cataract Cataract subcapsular Cerebrovascular accident Cerebrovascular disorder Change of bowel habit Chest discomfort Chest pain Chills Chronic obstructive pulmonary disease Circadian rhythm sleep disorder Coagulopathy Completed suicideConfusional stateConjunctivitis Connective tissue disorder Constipation Convulsion Coordination abnormal Cor pulmonale Coronary artery disease Costochondritis Cough Cystitis Cystitis noninfective Cytolytic hepatitis Deafness Death Decreased appetite DehydrationDelirium Delusion Dependence Depressed level of consciousness Depressed mood Depression Dermatitis Dermatitis bullous Dermatitis exfoliative Diabetes mellitusDiarrhoea Diplopia Discomfort Disorientation Dissociation Disturbance in attention Disturbance in sexual arousal Diverticulitis Dizziness Drug abuse Drug dependence Drug hypersensitivity Dry eye Dry mouth Dry skin Dysarthria Dysgeusia Dysmenorrhoea Dyspepsia Dysphagia Dysphonia Dysphoria Dyspnoea Ear pain Eczema Electrocardiogram QT prolonged Electrocardiogram ST segment Electrocardiogram ST segment depression Electrocardiogram T wave amplitude decreased Electrocardiogram T wave inversionElectrocardiogram abnormal Embolism Emotional disorder Endocrine disorder Enterocolitis Epistaxis Erectile dysfunction Eructation Erythema Erythema multiforme Euphoric mood Extrasystoles Eye disorder Eye irritation Eye pain Fatigue Feeling abnormal Feeling cold Flat affect Flatulence Flushing FrustrationFungal infection Gallbladder disorder Gastric disorder Gastric ulcer Gastritis Gastroenteritis Gastrointestinal disorder Gastrointestinal haemorrhageGastrointestinal pain Gastroesophageal reflux disease Gingival pain Gingivitis Glycosuria Gravitational oedema Haematemesis Haematochezia Haematuria Haemoglobin HaemorrhageHallucination Hangover Headache Hepatic enzyme increased Hepatitis Hepatobiliary disease Hepatocellular

injury      Hiccups      Homicidal ideation      Hormone level abnormal  
Hostility   Hot flush   Hyperglycaemia   Hyperhidrosis  
Hyperkalaemia   Hyperkinesia   Hyperlipidaemia  
Hypersensitivity   Hypersomnia   Hypertension   Hypertonia  
Hypoaesthesia   Hypocalcaemia   Hypogeusia   Hypoglycaemia  
Hypokalaemia   Hypokinesia   Hypotension   Hypoventilation  
Hypoxia      Ill-defined disorder   Immune system disorder  
Incontinence      Increased appetite      Increased bronchial  
secretion   Infarction   Infection   Infestation   Influenza   Influenza  
like illness      Initial insomnia   Injection site reaction  
Insomnia      Intestinal obstruction   Irritability      Ischaemia  
Joint stiffness   Lacrimation increased   Lethargy  
Leukocytosis      Libido decreased   Libido increased   Liver  
disorder   Liver function test abnormal   Liver injury      Loss of  
consciousness   Lower gastrointestinal haemorrhage   Lung disorder  
Lymphadenopathy   Malaise      Mania   Mediastinal disorder  
Melaena      Menopausal symptoms      Menorrhagia   Menstrual  
disorder   Mental disability   Mental disorder   Mental retardation  
Middle insomnia   Migraine      Mood swings   Mouth ulceration  
Multiple sclerosis      Muscle contractions involuntary  
Muscle enzyme increased      Muscle spasms      Musculoskeletal  
chest pain   Musculoskeletal discomfort   Musculoskeletal disorder  
Musculoskeletal pain   Musculoskeletal stiffness   Myalgia  
Mydriasis   Myocardial infarction   Myocardial ischaemia  
Myopia      Myositis      Nasal congestion   Nasal discomfort   Nasal  
ulcer   Nasopharyngitis   Nausea      Nephrolithiasis   Nervous system  
disorder   Nervousness   Neuropathy peripheral   Night blindness   Night  
sweats      Nightmare   Nocturia   Nystagmus   Obstruction   Obstructive  
airways disorder   Ocular vascular disorder   Oedema      Oedema  
peripheral   Oesophageal disorder   Oesophageal perforation  
Oesophagitis      Oropharyngeal pain      Orthostatic  
hypotension   Osteoarthritis   Osteomalacia   Osteoporosis      Pain  
Pain in extremity   Pain in jaw   Palpitations      Pancreatitis  
acute   Panic reaction   Paraesthesia   Paralysis   Paranoia  
Parosmia      Peripheral ischaemia   Peripheral vascular disorder  
Pharyngitis   Phobia      Photophobia   Photosensitivity reaction  
Platelet count decreased      Pleurisy      Pneumonia   Pollakiuria  
Polydipsia   Polyuria   Pruritus   Psoriasis   Psychomotor  
skills impaired   Psychotic disorder      Pulmonary embolism  
Pulmonary function test decreased   Purpura      Rash      Rash  
generalised   Rectal haemorrhage      Renal failure      Renal failure  
acute   Respiratory depression   Respiratory disorder   Respiratory  
failure      Respiratory tract infection   Restless legs syndrome  
Rhinitis      Rhinorrhoea   Salivary hypersecretion      Scotoma  
Semen analysis abnormal      Sensory disturbance      Sensory  
loss   Sexual dysfunction   Shock   Sinus congestion   Sinusitis   Sleep  
disorder   Sneezing   Snoring   Somnolence   Splenomegaly  
Sputum increased   Stomatitis   Suicidal ideation   Suicide attempt  
Supraventricular tachycardia   Swelling      Syncope      Tachycardia  
Tenderness   Tension      Terminal insomnia   Thinking abnormal  
Thirst      Throat irritation   Thrombocytopenia   Thrombocytosis  
Thrombosis   Thyroid disorder   Tinnitus      Tobacco user  
Tongue coated      Tooth disorder   Toxic epidermal necrolysis  
Transient ischaemic attack   Tremor      Ulcer   Upper respiratory  
tract infection   Upper-airway cough syndrome   Urethral disorder



Urethral syndrome Urinary incontinence Urinary retention  
Urinary tract disorder Urinary tract infection Urine  
abnormality Urine analysis abnormal Urine output increased  
Urticaria VIIth nerve paralysis Vaginal discharge Vascular  
dementia Vascular purpura Ventricular extrasystoles Ventricular  
tachycardia Vertigo Viral infection Vision blurred Visual  
acuity reduced Visual impairment Vitreous floaters Vomiting  
Weight decreased Weight increased Withdrawal syndrome

\*\*\*\*\*  
\*\*\*\*\*

Glucagon-like peptide 1 receptor - Group: Receptor

Treated with:

glucagon recombinant: approved biotech (0 associated side effects)  
For treatment of severe hypoglycemia, also used in  
gastrointestinal imaging

exenatide: approved biotech (49 associated side effects)

Indicated as adjunctive therapy to improve glycemic control in  
patients with Type 2 diabetes mellitus who are taking metformin, a  
sulfonylurea, or a combination of both, but have not achieved  
adequate glycemic control.

liraglutide: approved biotech (0 associated side effects)

For use/treatment in diabetes mellitus type 2 and obesity.

49 known side effects mediated through drugs targeting this protein:

Abdominal distension Abdominal pain Alopecia Alveolitis  
allergic Anaphylactic shock Angioedema Asthenia Blood  
creatinine increased Chest pain Chills Constipation Death  
Decreased appetite Dehydration Dermatitis Diarrhoea  
Dizziness Drug interaction Dysgeusia Dyspepsia Eructation  
Feeling jittery Flatulence Gastrointestinal pain  
Gastrooesophageal reflux disease Haemoglobin Haemorrhage  
Headache Hyperhidrosis Hypersensitivity Hypoglycaemia  
International normalised ratio increased Nausea  
Nervousness Pain Pneumonia Pruritus Pruritus generalised  
Rash Rash papular Renal failure acute Renal failure  
chronic Renal impairment Somnolence Toxic epidermal necrolysis  
Urethral disorder Urinary tract disorder Urticaria Vomiting

\*\*\*\*\*  
\*\*\*\*\*

Interleukin-3 receptor alpha chain - Group: Receptor

Treated with:

sargramostim: approved biotech (0 associated side effects)

For the treatment of cancer and bone marrow transplant

known side effects mediated through drugs targeting this protein:

\*\*\*\*\*  
\*\*\*\*\*

Sodium- and chloride-dependent neutral and basic amino acid  
transporter B(0+) - Group: Transporter

Treated with:

l-proline: approved, nutraceutical small molecule (0 associated  
side effects) L-Proline is extremely important for the proper  
functioning of joints and tendons and also helps maintain and  
strengthen heart muscles.

known side effects mediated through drugs targeting this protein:

\*\*\*\*\*  
\*\*\*\*\*

Interleukin-1 receptor type I - Group: Receptor

Treated with:

anakinra: approved biotech (0 associated side effects) For the treatment of adult rheumatoid arthritis.

known side effects mediated through drugs targeting this protein:

\*\*\*\*\*  
\*\*\*\*\*

Voltage-gated potassium channel - Group: Channel

Treated with:

(2s)-2-(butyryloxy)-3-hydroxypropyl nonanoate: experimental  
small molecule (0 associated side effects)

known side effects mediated through drugs targeting this protein:

\*\*\*\*\*  
\*\*\*\*\*

Proto-oncogene tyrosine-protein kinase receptor ret - Group: Enzyme

Treated with:

1-ter-butyl-3-p-tolyl-1h-pyrazolo[3,4-d]pyrimidin-4-ylamine:  
experimental small molecule (0 associated side effects)  
4-bromo-2-fluoro-n-[(4e)-6-methoxy-7-[(1-methylpiperidin-4-yl)methoxy]quinazolin-4(1h)-ylidene]aniline: experimental small  
molecule (0 associated side effects)

known side effects mediated through drugs targeting this protein:

\*\*\*\*\*  
\*\*\*\*\*

Potassium voltage-gated channel subfamily A member 1 - Group:

Channel

Treated with:

enflurane: approved small molecule (15 associated side effects)

Used for the induction and maintenance of general anaesthesia during surgery and cesarean section and also used for analgesia during vaginal delivery.

amitriptyline: approved small molecule (109 associated side effects) For the treatment of depression, chronic pain, irritable bowel syndrome, sleep disorders, diabetic neuropathy, agitation and insomnia, and migraine prophylaxis.

isoflurane: approved small molecule (31 associated side effects)

For induction and maintenance of general anesthesia.

methoxyflurane: approved small molecule (0 associated side effects) For use in the induction and maintenance of general anesthesia

nifedipine: approved small molecule (217 associated side effects) For the management of vasospastic angina, chronic stable angina, hypertension, and Raynaud's phenomenon. May be used as a

first line agent for left ventricular hypertrophy and isolated systolic hypertension (long-acting agents).

desflurane: approved small molecule (110 associated side effects) For use as an inhalation agent for induction and/or maintenance of anesthesia for inpatient and outpatient surgery in adults.

sevoflurane: approved small molecule (107 associated side effects) Used for induction and maintenance of general anesthesia in adult and pediatric patients for inpatient and outpatient surgery.

350 known side effects mediated through drugs targeting this protein:

Abdominal discomfort Abdominal pain Acidosis Acute coronary syndrome Acute generalised exanthematous pustulosis Affect lability Ageusia Agitation Agranulocytosis Alanine aminotransferase increased Albuminuria Alopecia Amblyopia Ammonia increased Amnesia Anaemia Anaphylactic shock Anaphylactoid reaction Angina pectoris Angioedema Angiopathy Antinuclear antibody positive Anxiety Aortic dissection Apnoea Arrhythmia Arrhythmia supraventricular Arthralgia Arthritis Arthropathy Aspartate aminotransferase increased Asthenia Asthma Ataxia Atrial fibrillation Atrioventricular block Atrioventricular block complete Atrioventricular block second degree Back pain Bezoar Blindness Blindness transient Blister Blood creatinine increased Blood pressure increased Body temperature decreased Body temperature increased Bone disorder Bradycardia Breast engorgement Breast enlargement Breast pain Breath holding Bronchospasm Burning sensation Cardiac arrest Cardiac disorder Cardiac failure Cardiac failure congestive Cardiac fibrillation Cardiogenic shock Cardiomyopathy Cellulitis Cerebrovascular accident Chest pain Chills Cholestasis Coagulopathy Coma Confusional state Conjunctival hyperaemia Conjunctivitis Constipation Convulsion Coombs direct test positive Coordination abnormal Cough Crocodile tears syndrome Decreased appetite Delirium Delusion Dependence Dermatitis atopic Dermatitis bullous Dermatitis exfoliative Diarrhoea Diplopia Discomfort Disorientation Disturbance in attention Disturbance in sexual arousal Dizziness Drug administration error Drug dependence Dry mouth Dysarthria Dysgeusia Dyskinesia Dyspepsia Dysphagia Dyspnoea Dysuria Electrocardiogram QT prolonged Electrocardiogram T wave inversion Electrocardiogram abnormal Encephalopathy Eosinophilia Epistaxis Erectile dysfunction Eructation Erythema Erythema multiforme Erythromelalgia Extrapyrimal disorder Extrasystoles Eye disorder Eye haemorrhage Eye inflammation Eye irritation Eye pain Eyelid oedema Face oedema Fatigue Feeling abnormal Feeling hot Feeling jittery Flatulence Flushing Foetor hepaticus Galactorrhoea Gamma-glutamyltransferase increased Gastrointestinal disorder Gastrointestinal haemorrhage Gastrointestinal obstruction Gastrointestinal pain Gastrointestinal tract irritation Gastrooesophageal reflux disease Gingival bleeding Gingival

disorder Gingival hyperplasia Glycosuria Gout Gynaecomastia  
 Haematuria Haemoglobin Haemolysis Haemolytic anaemia  
 Haemoptysis Haemorrhage Hallucination Headache Hepatic  
 failure Hepatic function abnormal Hepatic necrosis Hepatitis  
 Hepatobiliary disease Hepatocellular injury Hiccups Hot  
 flush Hyperaemia Hyperbilirubinaemia Hyperglycaemia  
 Hyperhidrosis Hyperkalaemia Hyperkinesia Hyperplasia  
 Hyperpyrexia Hypersensitivity Hypertension  
 Hyperthermia malignant Hypertonia Hypertrophy Hyperventilation  
 Hypoaesthesia Hypocapnia Hypokalaemia Hypokinesia  
 Hypomania Hypophosphataemia Hypotension Hypothermia  
 Hypoventilation Hypoxia Ileus paralytic Ill-defined  
 disorder Inappropriate antidiuretic hormone secretion  
 Incontinence Increased bronchial secretion Infarction  
 Infection Inflammation Insomnia Intraocular pressure  
 increased Irritability Ischaemia Jaundice Joint stiffness  
 Keratitis Laboratory test abnormal Lacrimation increased  
 Laryngospasm Leukocytosis Leukopenia Libido decreased  
 Liver disorder Loss of consciousness Lymphadenopathy  
 Malaise Malignant hypertension Mania Mediastinal disorder  
 Melaena Menopausal symptoms Menstrual disorder  
 Mental disability Mental status changes Metabolic acidosis  
 Migraine Mood swings Muscle rigidity Muscle spasms  
 Muscle twitching Muscular weakness Musculoskeletal discomfort  
 Musculoskeletal stiffness Myalgia Mycobacterium avium  
 complex infection Mycobacterium test Mydriasis Myocardial  
 infarction Myocardial ischaemia Nasal congestion Nausea Neck  
 pain Necrosis Nephritis Nephrolithiasis Nervous system  
 disorder Nervousness Neuroleptic malignant syndrome Neuropathy  
 peripheral Nightmare Nocturia Nodal arrhythmia Obstruction  
 Obstructive airways disorder Ocular hyperaemia Oedema  
 Oedema peripheral Oesophagitis Oliguria Oropharyngeal  
 discomfort Oropharyngeal pain Orthostatic hypotension  
 Osteoarthritis Pain in extremity Palpitations  
 Pancreatitis acute Pancytopenia Paraesthesia  
 Paranoia Parotid gland enlargement Pelvic pain Periorbital  
 oedema Petechiae Pharyngitis Phlebitis Photosensitivity  
 reaction Poisoning Pollakiuria Polyuria Pruritus Psychotic  
 disorder Pulmonary congestion Pulmonary function test decreased  
 Pulmonary oedema Purpura Rales Rash Rash erythematous Renal  
 failure Renal failure chronic Renal impairment Respiratory  
 arrest Respiratory depression Respiratory disorder Respiratory  
 distress Respiratory failure Respiratory tract congestion  
 Respiratory tract infection Rhabdomyolysis Rhinitis  
 Salivary hypersecretion Sensory loss Shock Sinusitis  
 Skin burning sensation Skin disorder Sleep disorder  
 Somnolence Sputum increased Stomatitis Stridor  
 Supraventricular extrasystoles Swelling Syncope  
 Systemic lupus erythematosus Tachyarrhythmia Tachycardia  
 Tardive dyskinesia Tenderness Tension Testicular  
 swelling Thirst Thrombocytopenia Tinnitus Tongue  
 discolouration Torsade de pointes Toxic epidermal necrolysis  
 Tremor Tubulointerstitial nephritis Ulcer Ulcerative  
 keratitis Upper respiratory tract infection Urethral disorder  
 Urinary incontinence Urinary retention Urinary tract disorder

Urine abnormality Urine analysis abnormal Urine output  
Urine output increased Urogenital disorder Urticaria  
Vascular purpura Vasodilation procedure Ventricular arrhythmia  
Ventricular extrasystoles Ventricular failure Ventricular  
fibrillation Ventricular hypokinesia Ventricular  
tachycardia Vertigo Vision blurred Visual acuity reduced  
Visual impairment Vomiting Weight decreased Weight increased  
Wheezing

\*\*\*\*\*  
\*\*\*\*\*

Gastrin/cholecystokinin type B receptor - Group: Receptor

Treated with:

pentagastrin: approved small molecule (0 associated side effects) Used as a diagnostic aid for evaluation of gastric acid secretory function

known side effects mediated through drugs targeting this protein:

\*\*\*\*\*  
\*\*\*\*\*

Equilibrative nucleoside transporter 1 - Group: Transporter

Treated with:

troglitazone: withdrawn small molecule (32 associated side effects) For the treatment of Type II diabetes mellitus. It is used alone or in combination with a sulfonylurea, metformin, or insulin as an adjunct to diet and exercise.

gemcitabine: approved small molecule (137 associated side effects) For the first-line treatment of patients with metastatic breast cancer, locally advanced (Stage IIIA or IIIB), or metastatic (Stage IV) non-small cell lung cancer and as first-line treatment for patients with adenocarcinoma of the pancreas.

pemetrexed: approved small molecule (68 associated side effects)

Used in combination with cisplatin for the treatment of malignant pleural mesothelioma in adults whose disease is unresectable or who otherwise are not candidates for potentially curative surgery. Also used as a monotherapy for the treatment of locally advanced or metastatic non-small cell lung cancer (NSCLC) after prior chemotherapy

ribavirin: approved small molecule (195 associated side effects) For the treatment of chronic hepatitis C and for respiratory syncytial virus (RSV).

cytarabine: approved small molecule (0 associated side effects)

For the treatment of acute non-lymphocytic leukemia, acute lymphocytic leukemia and blast phase of chronic myelocytic leukemia.

fludarabine: approved small molecule (185 associated side effects) For the treatment of adult patients with B-cell chronic lymphocytic leukemia (CLL) who have not responded to or whose disease has progressed during treatment with at least one standard alkylating-agent containing regimen

371 known side effects mediated through drugs targeting this protein:

Abdominal pain Abdominal pain upper Acidosis Acquired haemophilia Acute coronary syndrome Acute leukaemia Acute myeloid leukaemia Acute respiratory distress syndrome Affect

lability Aggression Agitation Agranulocytosis Alanine  
 aminotransferase increased Alopecia Altered state of  
 consciousness Alveolitis allergic Anaemia Anaemia  
 haemolytic autoimmune Anaphylactic shock Anaphylactoid reaction  
 Aneurysm Anger Angina pectoris Angiopathy Anxiety  
 Aortic dissection Aplasia pure red cell Aplastic anaemia  
 Apnoea Arrhythmia Arrhythmia supraventricular Arthralgia  
 Arthritis Aspartate aminotransferase increased Asthenia  
 Asthma Atelectasis Autoimmune disorder Autoimmune  
 thrombocytopenia Azotaemia Back pain Bacterial infection  
 Baltic myoclonic epilepsy Bladder pain Blindness  
 Blindness transient Blister Blood alkaline phosphatase  
 increased Blood bilirubin increased Blood creatine phosphokinase  
 increased Blood creatinine decreased Blood creatinine increased  
 Blood disorder Blood lactate dehydrogenase increased Blood  
 triglycerides increased Blood urea increased Blood uric acid  
 increased Body temperature increased Bone disorder Bone pain  
 Bradycardia Bronchial hyperreactivity Bronchitis  
 Bronchospasm Burkitt's lymphoma Carcinoma in situ  
 Cardiac arrest Cardiac disorder Cardiac failure Cardiac  
 failure congestive Cardiovascular disorder Cell death  
 Cellulitis Cerebellar syndrome Cerebral haemorrhage  
 Cerebrovascular accident Chest pain Chills Cholangitis  
 Cholelithiasis Chronic obstructive pulmonary disease  
 Colitis Coma Completed suicide Confusional state  
 Conjunctivitis Connective tissue disorder Constipation  
 Convulsion Cough Creatinine renal clearance decreased  
 Crystal urine Crystalluria Cyanosis Cystitis  
 Cystitis haemorrhagic Cystitis noninfective Deafness  
 neurosensory Death Decreased appetite Deep vein thrombosis  
 Dehydration Dependence Depressed level of consciousness  
 Dermatitis Dermatitis bullous Diabetes mellitus Diarrhoea  
 Discomfort Disease progression Dissociation Disturbance  
 in attention Dizziness Drug abuse Dry mouth Dry skin  
 Dysgeusia Dyspepsia Dysphagia Dysphonia Dyspnoea  
 Dyspnoea exertional Dysuria Eczema Effusion  
 Embolism Endocarditis Endocrine disorder Epistaxis  
 Erythema Erythema multiforme Evans syndrome  
 Extrasystoles Extravasation Eye disorder Face oedema  
 Factor VIII deficiency Fatigue Febrile neutropenia  
 Feeling abnormal Fibrosis Flank pain Fluid retention  
 Flushing Fungal infection Gamma-glutamyltransferase  
 increased Gangrene Gastrointestinal disorder Gastrointestinal  
 haemorrhage Gastrointestinal pain Generalised oedema Glomerular  
 filtration rate decreased Gout Haematuria Haemoglobin Haemoglobin  
 decreased Haemolysis Haemolytic anaemia Haemolytic uraemic  
 syndrome Haemoptysis Haemorrhage Hallucination Headache  
 Hearing impaired Heart disease congenital Hepatic enzyme  
 increased Hepatic failure Hepatic function abnormal Hepatic  
 steatosis Hepatitis Hepatobiliary disease Hepatomegaly  
 Herpes simplex Herpes virus infection Herpes zoster  
 Hormone level abnormal Hyperbilirubinaemia Hyperglycaemia  
 Hyperhidrosis Hyperkalaemia Hyperphosphataemia  
 Hypersensitivity Hypertension Hyperthyroidism  
 Hypertriglyceridaemia Hyperuricaemia Hypoaesthesia

Hypocalcaemia Hypokalaemia Hypomagnesaemia  
 Hyporeflexia Hypotension Hypothyroidism Hypoventilation  
 Hypoxia Ill-defined disorder Immune system disorder  
 Infarction Infection Infestation Influenza Influenza like  
 illness Injection site inflammation Injection site necrosis  
 Injection site pain Injection site reaction Insomnia  
 Interstitial lung disease Irritability Jaundice  
 Laboratory test abnormal Lacrimation increased Lethargy  
 Leukoencephalopathy Leukopenia Liver function test abnormal  
 Loss of consciousness Lung disorder Lung infection Lung  
 infiltration Lymphopenia Lymphoproliferative disorder Malaise  
 Mediastinal disorder Melanocytic naevus Memory impairment  
 Menstrual disorder Mental disability Mental disorder  
 Metabolic acidosis Metastatic neoplasm Microangiopathic  
 haemolytic anaemia Mood swings Mucosal inflammation  
 Musculoskeletal discomfort Musculoskeletal disorder  
 Musculoskeletal pain Myalgia Myelodysplastic syndrome  
 Myelofibrosis Myeloid leukaemia Myeloid metaplasia  
 Myocardial infarction Myositis Nasal congestion Nausea  
 Necrosis Neoplasm malignant Nephropathy toxic Nervous  
 system disorder Nervousness Neuritis Neuropathy peripheral  
 Neutropenia Neutrophil count decreased Non-small cell lung  
 cancer Obstructive airways disorder Ocular surface disease  
 Odynophagia Oedema Oedema peripheral Oesophagitis  
 Opportunistic infection Optic nerve disorder Optic  
 neuritis Oropharyngeal discomfort Oropharyngeal pain  
 Osteomyelitis Osteoporosis Pain Pain in extremity  
 Pancreatitis Pancytopenia Paraesthesia Pemphigus  
 Peptic ulcer Pericardial effusion Peripheral motor  
 neuropathy Peripheral sensory neuropathy Petechiae Pharyngitis  
 Phlebitis Platelet count decreased Pleural disorder  
 Pleural effusion Pneumonia Pneumothorax Polyp Progressive  
 multifocal leukoencephalopathy Protein urine present Proteinuria  
 Prurigo Pruritus Psychotic disorder Pulmonary  
 embolism Pulmonary fibrosis Pulmonary haemorrhage Pulmonary  
 hypertension Pulmonary oedema Pulmonary toxicity Purpura  
 Pyelonephritis Radial nerve palsy Rash Recall phenomenon  
 Renal failure Renal function test abnormal Renal impairment  
 Respiratory disorder Respiratory distress Respiratory  
 failure Respiratory tract infection Reticulocytosis Retinal  
 detachment Retinal exudates Rheumatoid arthritis Rhinitis  
 Sarcoidosis Seborrhoeic dermatitis Sensory loss Sepsis  
 Shock Sinusitis Skin cancer Skin disorder Skin exfoliation  
 Skin toxicity Sleep disorder Somnolence Stomatitis  
 Sudden death Suicidal behaviour Suicidal ideation  
 Suicide attempt Supraventricular tachycardia Syncope  
 Systemic lupus erythematosus Tachycardia Tachypnoea Tenderness  
 Tension Thrombocytopenia Thrombocytopenic purpura  
 Thrombosis Thrombotic thrombocytopenic purpura Thyroid  
 disorder Tinnitus Toxic epidermal necrolysis Transient  
 ischaemic attack Transplant rejection Tumour lysis syndrome Type  
 1 diabetes mellitus Ulcerative keratitis Upper respiratory  
 tract infection Urinary hesitation Urinary tract infection  
 Urticaria Vascular purpura Vasculitis Venous thrombosis  
 Ventricular extrasystoles Vertigo Viral infection

Vision blurred Visual impairment Volume blood increased  
Vomiting Weight decreased Weight increased Wheezing X-  
linked lymphoproliferative syndrome

\*\*\*\*\*  
\*\*\*\*\*

Tumor necrosis factor receptor superfamily member 1A - Group:  
Receptor

Treated with:

6-[3-(4-morpholinyl)propyl]-2-(3-nitrophenyl)-5-thioxo-5,6,-dihydro-  
7h-thienol[2',3':4,5]pyrrolo[1,2-c]imidazol-7-one: experimental  
small molecule (0 associated side effects)

known side effects mediated through drugs targeting this protein:

\*\*\*\*\*  
\*\*\*\*\*

Tumor necrosis factor receptor superfamily member 1B - Group:  
Receptor

Treated with:

etanercept: approved biotech (0 associated side effects) For  
treatment of severe active rheumatoid arthritis in adults, severe  
juvenile idiopathic arthritis, ankylosing spondylitis, and severe  
plaque psoriasis.

known side effects mediated through drugs targeting this protein:

\*\*\*\*\*  
\*\*\*\*\*

Synaptic vesicular amine transporter - Group: Transporter

Treated with:

amphetamine: illicit,approved small molecule (95 associated  
side effects) For treatment of Attention Deficit Disorder with  
Hyperactivity (ADDH) and narcolepsy in children.

reserpine: approved small molecule (44 associated side effects)  
Foe the treatment of hypertension

alseroxyton: approved small molecule (0 associated side  
effects) For the treatment of hypertension and as an adjunct in  
the management of angina pectoris.

benzphetamine: illicit,approved small molecule (0 associated  
side effects) For the management of exogenous obesity as a short  
term adjunct (a few weeks) in a regimen of weight reduction based on  
caloric restriction

deserpidine: approved small molecule (0 associated side  
effects) For the treatment of hypertension.

ephedra: approved,withdrawn,nutraceutical small molecule (0  
associated side effects) Ephedra is widely used by athletes,  
despite a lack of evidence that it enhances athletic performance.  
Ephedra has also been used for weight loss.

ephedrine: approved small molecule (31 associated side effects)  
Ephedrine commonly used as a stimulant, appetite suppressant,  
concentration aid, decongestant, and to treat hypotension associated  
with anaesthesia.

mmda: illicit,experimental small molecule (0 associated side  
effects) MMDA is a recreational drug. It has no current medical  
uses and is a Schedule I controlled substance in the USA at present.



3,4-methylenedioxyamphetamine: illicit, experimental small molecule (0 associated side effects) Clinical trials are now testing the therapeutic potential of MDMA for post-traumatic stress disorder (PTSD) and anxiety associated with terminal cancer. MDMA is one of the four most widely used illicit drugs in the U.S.

4-methoxyamphetamine: illicit, experimental small molecule (0 associated side effects)

dextroamphetamine: illicit, approved small molecule (0 associated side effects) Used to treat attention deficit hyperactivity disorder (ADHD).

tetrabenazine: approved small molecule (37 associated side effects) For the symptomatic treatment of hyperkinetic movement disorder.

isometheptene: approved small molecule (0 associated side effects) Isometheptene is a sympathomimetic drug which causes vasoconstriction. It is used for treating migraines and tension headaches.

propylhexedrine: approved small molecule (0 associated side effects) It is used to provide temporary symptomatic relief of nasal congestion due to colds, allergies and allergic rhinitis.

152 known side effects mediated through drugs targeting this protein:

Abdominal pain Abdominal pain upper Acute coronary syndrome  
Affect lability Aggression Agitation Akathisia  
Anaphylactic shock Angina pectoris Angioedema Anxiety  
Arrhythmia Asthenia Atrophy Attention  
deficit/hyperactivity disorder Balance disorder Blood pressure  
increased Blood pressure systolic increased Body temperature  
increased Bradycardia Bradykinesia Breast engorgement  
Bronchitis Cardiac arrest Cardiac death Cardio-  
respiratory arrest Cardiomyopathy Cerebral haemorrhage  
Cerebrovascular accident Chest pain Chills Coma  
Confusional state Conjunctival hyperaemia Constipation  
Convulsion Deafness Death Decreased appetite Delirium  
Dependence Depression Dermatitis Diarrhoea Disturbance in  
sexual arousal Dizziness Drug abuse Drug dependence Dry mouth  
Dysarthria Dyskinesia Dysmenorrhoea Dyspepsia Dysphagia  
Dysphoria Dyspnoea Dysuria Ecchymosis Elastosis  
perforans Epistaxis Erectile dysfunction Erythema multiforme  
Euphoric mood Extrapyrarnidal disorder Extrasystoles  
Fatigue Feeling abnormal Flushing Gait disturbance  
Gastrointestinal pain Glaucoma Gynaecomastia Haemoglobin  
Haemorrhage Hallucination Headache Hyperaemia  
Hyperhidrosis Hyperkinesia Hyperpyrexia  
Hypersensitivity Hypertension Hyperthermia Hypertonia  
Hypotension Infarction Infection Insomnia Irritability  
Lethargy Libido decreased Loss of consciousness Mental  
disorder Mood swings Muscle spasms Muscle twitching  
Musculoskeletal discomfort Myalgia Myocardial infarction  
Nasal congestion Nausea Nervousness Nightmare Obsessive-  
compulsive disorder Oedema Optic atrophy Osteoarthritis  
Pain Pallor Palpitations Panic attack Panic  
reaction Personality change Photosensitivity reaction  
Poisoning Polyuria Prostatism Pruritus Psychotic

disorder    Purpura        Rash    Respiratory disorder    Respiratory tract  
 infection    Rhabdomyolysis    Schizophrenia        Sedation    Shock Skin  
 disorder    Somnolence    Speech disorder    Stevens-Johnson syndrome  
               Sudden death        Syncope        Tachycardia Tension        Tic    Tooth  
 disorder    Toxic epidermal necrolysis    Tremor        Upper respiratory  
 tract infection    Urethral disorder Urinary retention Urinary tract  
 disorder    Urinary tract infection        Urticaria    Uveitis  
               Vascular purpura    Vertigo        Viral infection    Vomiting  
               Weight decreased    Weight increased

\*\*\*\*\*  
 \*\*\*\*\*

Transient receptor potential cation channel subfamily V member 1 -  
 Group: Channel

Treated with:

alpha-linolenic acid: approved, nutraceutical small molecule (0  
 associated side effects) For nutritional supplementation and for  
 treating dietary shortage or imbalance.

icosapent: approved, nutraceutical small molecule (0 associated  
 side effects) EPA can be used for lowering elevated triglycerides  
 in those who are hyperglyceridemic. In addition, EPA may play a  
 therapeutic role in patients with cystic fibrosis by reducing  
 disease severity and may play a similar role in type 2 diabetics in  
 slowing the progression of diabetic nephropathy.

aspartame: approved, nutraceutical small molecule (0 associated  
 side effects) Used as a diet supplement and sugar substitute.

known side effects mediated through drugs targeting this protein:

\*\*\*\*\*  
 \*\*\*\*\*

5-hydroxytryptamine 2A receptor - Group: Receptor

Treated with:

ziprasidone: approved small molecule (251 associated side  
 effects) For the treatment of schizophrenia and related psychotic  
 disorders.

methysergide: approved small molecule (69 associated side  
 effects) For the treatment of vascular headache

cabergoline: approved small molecule (96 associated side  
 effects) For the treatment of hyperprolactinemic disorders, either  
 idiopathic or due to prolactinoma (prolactin-secreting adenomas).

May also be used to manage symptoms of Parkinsonian Syndrome as  
 monotherapy during initial symptomatic management or as an adjunct  
 to levodopa therapy during advanced stages of disease.

ropinirole: approved small molecule (631 associated side  
 effects) For the treatment of the signs and symptoms of idiopathic  
 Parkinson's disease. Also used for the treatment of restless legs  
 syndrome.

amitriptyline: approved small molecule (109 associated side  
 effects) For the treatment of depression, chronic pain, irritable  
 bowel syndrome, sleep disorders, diabetic neuropathy, agitation and  
 insomnia, and migraine prophylaxis.

olanzapine: approved small molecule (393 associated side  
 effects) For the acute and maintenance treatment of schizophrenia  
 and related psychotic disorders, as well as acute treatment of manic

or mixed episodes of bipolar 1 disorder. Intramuscular olanzapine is indicated for the rapid control of agitated patients.

clozapine: approved small molecule (228 associated side effects) For use in patients with treatment-resistant schizophrenia.

mirtazapine: approved small molecule (272 associated side effects) For the treatment of major depressive disorder.

loxapine: approved small molecule (74 associated side effects)

For the management of the manifestations of psychotic disorders such as schizophrenia

remoxipride: approved, withdrawn small molecule (0 associated side effects) Remoxipride is an atypical antipsychotic once used for the treatment of schizophrenia.

pramipexole: approved small molecule (620 associated side effects) For the treatment of signs and symptoms of idiopathic Parkinson's disease

promazine: approved small molecule (0 associated side effects)

Used as an adjunct for short term treatment of moderate and severe psychomotor agitation. Also used to treat agitation or restlessness in the elderly.

cyproheptadine: approved small molecule (63 associated side effects) For treatment of perennial and seasonal allergic rhinitis, vasomotor rhinitis, allergic conjunctivitis due to inhalant allergens and foods, mild uncomplicated allergic skin manifestations of urticaria and angioedema, amelioration of allergic reactions to blood or plasma, cold urticaria, dermatographism, and as therapy for anaphylactic reactions adjunctive to epinephrine.

imipramine: approved small molecule (100 associated side effects) For the relief of symptoms of depression and as temporary adjunctive therapy in reducing enuresis in children aged 6 years and older. May also be used to manage panic disorders, with or without agoraphobia, as a second line agent in ADHD, management of eating disorders, for short-term management of acute depressive episodes in bipolar disorder and schizophrenia, and for symptomatic treatment of postherpetic neuralgia.

fluoxetine: approved small molecule (516 associated side effects) Labeled indication include: major depressive disorder (MDD), moderate to severe bulimia nervosa, obsessive-compulsive disorder (OCD), premenstrual dysphoric disorder (PMDD), panic disorder with or without agoraphobia, and combination treatment with olanzapine for treatment-resistant or bipolar I depression.

Unlabeled indications include: selective mutism, mild dementia-associated agitation in nonpsychotic patients, post-traumatic stress disorder (PTSD), social anxiety disorder, chronic neuropathic pain, fibromyalgia, and Raynaud's phenomenon.

chlorpromazine: approved small molecule (111 associated side effects) For the treatment of schizophrenia, control nausea and vomiting, For relief of restlessness and apprehension before surgery, adjunct in the treatment of tetanus, control the manifestations of the manic type of manic-depressive illness.

haloperidol: approved small molecule (79 associated side effects) For the management of psychotic disorders (eg. schizophrenia) and delirium, as well as to control tics and vocal utterances of Tourette's syndrome (Gilles de la Tourette's syndrome). Also used for the treatment of severe behavioural

problems in children with disruptive behaviour disorder or ADHD (attention-deficit hyperactivity disorder). Haloperidol has been used in the prevention and control of severe nausea and vomiting.  
nortriptyline: approved small molecule (91 associated side effects) For the treatment of depression, chronic pain, irritable bowel syndrome, sleep disorders, diabetic neuropathy, agitation and insomnia, and migraine prophylaxis.

lisuride: approved small molecule (0 associated side effects)  
For the management of Parkinson's Disease

cisapride: approved, withdrawn small molecule (0 associated side effects) For the symptomatic treatment of adult patients with nocturnal heartburn due to gastroesophageal reflux disease.

trazodone: approved small molecule (194 associated side effects) For the treatment of depression.

thioridazine: approved small molecule (92 associated side effects) For the treatment of schizophrenia and generalized anxiety disorder.

ergotamine: approved small molecule (15 associated side effects)

For use as therapy to abort or prevent vascular headache, e.g., migraine, migraine variants, or so called "histaminic cephalalgia".

apomorphine: approved small molecule (45 associated side effects) For the acute, intermittent treatment of hypomobility, off episodes (end-of-dose wearing off and unpredictable on/off episodes) associated with advanced Parkinson's disease.

paroxetine: approved small molecule (505 associated side effects) Labeled indications include: major depressive disorder (MDD), panic disorder with or without agoraphobia, obsessive-compulsive disorder (OCD), social anxiety disorder (social phobia), generalized anxiety disorder (GAD), post-traumatic stress disorder (PTSD), and premenstrual dysphoric disorder (PMDD). Unlabeled indications include: eating disorders, impulse control disorders, vasomotor symptoms of menopause, obsessive-compulsive disorder (OCD) in children, and mild dementia-associated agitation in nonpsychotic individuals.

trimipramine: approved small molecule (0 associated side effects) For the treatment of depression and depression accompanied by anxiety, agitation or sleep disturbance

risperidone: approved small molecule (532 associated side effects) For the treatment of schizophrenia in adults and in adolescents, ages 13 to 17, and for the short-term treatment of manic or mixed episodes of bipolar I disorder in children and adolescents ages 10 to 17. May also be used to manage symptoms of inappropriate behavior due to aggression and/or psychosis in patients with severe dementia.

epinastine: approved small molecule (12 associated side effects)  
For the prevention of itching associated with allergic conjunctivitis.

propiomazine: approved small molecule (0 associated side effects) Propiomazine is largely used for its antihistaminic sleep inducing effects in treating insomnia.

minaprine: approved small molecule (0 associated side effects)  
For the treatment of depression

donepezil: approved small molecule (310 associated side effects) For the palliative treatment of mild to moderate dementia of the Alzheimer's type.

flupenthixol: approved small molecule (0 associated side effects) For use in the treatment of schizophrenia and depression

cyclobenzaprine: approved small molecule (136 associated side effects) For use as an adjunct to rest and physical therapy for relief of muscle spasm associated with acute, painful musculoskeletal conditions.

mesoridazine: approved small molecule (83 associated side effects) Used in the treatment of schizophrenia, organic brain disorders, alcoholism and psychoneuroses.

promethazine: approved small molecule (80 associated side effects) For the treatment of allergic disorders, and nausea/vomiting.

tegaserod: withdrawn small molecule (125 associated side effects) Provides relief from the symptoms of irritable bowel syndrome including chronic idiopathic constipation.

doxepin: approved small molecule (210 associated side effects) Labeled indications: depression and insomnia. Unlabeled indications: chronic and neuropathic pain, anxiety, idiopathic urticaria.

nefazodone: approved, withdrawn small molecule (246 associated side effects) For the treatment of depression.

desipramine: approved small molecule (120 associated side effects) For relief of symptoms in various depressive syndromes, especially endogenous depression. It has also been used to manage chronic peripheral neuropathic pain, as a second line agent for the management of anxiety disorders (e.g. panic disorder, generalized anxiety disorder), and as a second or third line agent in the ADHD management.

pergolide: approved, withdrawn small molecule (354 associated side effects) Indicated as adjunctive treatment to levodopa/carbidopa in the management of the signs and symptoms of Parkinson's disease. It was withdrawn from the US and Canadian markets in 2007 due to an increased risk of cardiac valvulopathy.

bromocriptine: approved small molecule (120 associated side effects) For the treatment of galactorrhea due to hyperprolactinemia, prolactin-dependent menstrual disorders and infertility, prolactin-secreting adenomas, prolactin-dependent male hypogonadism, as adjunct therapy to surgery or radiotherapy for acromegaly or as monotherapy in special cases, as monotherapy in early Parkinsonian Syndrome or as an adjunct with levodopa in advanced cases with motor complications. Bromocriptine has also been used off-label to treat restless legs syndrome and neuroleptic malignant syndrome.

quetiapine: approved small molecule (359 associated side effects) For the treatment of schizophrenia and related psychotic disorders.

aripiprazole: approved small molecule (630 associated side effects) For the treatment of schizophrenia and related psychotic disorders.

chlorprothixene: approved small molecule (0 associated side effects) For treatment of psychotic disorders (e.g. schizophrenia) and of acute mania occurring as part of bipolar disorders.

clomipramine: approved small molecule (349 associated side effects)

paliperidone: approved small molecule (216 associated side effects) For the treatment of schizophrenia.

dihydroergotoxine: approved small molecule (0 associated side effects) For potential use in the treatment of Alzheimer's disease.

yohimbine: approved small molecule (0 associated side effects)  
Indicated as a sympatholytic and mydriatic. Impotence has been successfully treated with yohimbine in male patients with vascular or diabetic origins and psychogenic origins.

methotrimeprazine: approved small molecule (0 associated side effects) For the treatment of psychosis, particular those of schizophrenia, and manic phases of bipolar disorder.

mmda: illicit,experimental small molecule (0 associated side effects) MDMA is a recreational drug. It has no current medical uses and is a Schedule I controlled substance in the USA at present.

3,4-methylenedioxymethamphetamine: illicit,experimental small molecule (0 associated side effects) Clinical trials are now testing the therapeutic potential of MDMA for post-traumatic stress disorder (PTSD) and anxiety associated with terminal cancer. MDMA is one of the four most widely used illicit drugs in the U.S.

dimethyltryptamine: illicit,experimental small molecule (0 associated side effects) Some people use this compound as a psychedelic inducing agent.

acepromazine: approved small molecule (0 associated side effects) Acepromazine was first used in humans in the 1950s as an antipsychotic agent. It is now rarely used in humans. Acepromazine is frequently used in animals as a sedative and antiemetic. Its principal value is in quietening and calming anxious animals.

molindone: approved small molecule (46 associated side effects)  
Molindone is used for the management of the manifestations of psychotic disorders.

pipotiazine: approved small molecule (94 associated side effects) For the maintenance treatment of chronic non-agitated schizophrenic patients.

thiopropazine: approved small molecule (0 associated side effects) For the treatment of all types of acute and chronic schizophrenia, including those which did not respond to the usual neuroleptics; manic syndromes.

thiothixene: approved small molecule (79 associated side effects) For the management of schizophrenia.

zuclopenthixol: approved small molecule (0 associated side effects) For the management of the manifestations of schizophrenia.

aniracetam: experimental small molecule (0 associated side effects)

fluspirilene: approved small molecule (0 associated side effects) Used for the treatment of schizophrenia.

sertindole: approved,withdrawn small molecule (0 associated side effects) Used in the treatment of schizophrenia.

mianserin: approved small molecule (0 associated side effects)  
For the treatment of depression.

amisulpride: approved small molecule (0 associated side effects) Investigated for use/treatment in schizophrenia and

schizoaffective disorders, mania in bipolar disorder, and depression.

cinitapride: approved small molecule (0 associated side effects) For the treatment of gastrointestinal disorders associated with motility disturbances such as gastroesophageal reflux disease, non-ulcer dyspepsia and delayed gastric emptying.

1425 known side effects mediated through drugs targeting this protein:

5q minus syndrome Abasia Abdominal adhesions Abdominal discomfort Abdominal distension Abdominal neoplasm Abdominal pain Abdominal pain lower Abdominal pain upper Abdominal tenderness Abnormal behaviour Abnormal dreams Abnormal faeces Abortion spontaneous Abscess Accommodation disorder Acidosis Acne Actinic keratosis Acute abdomen Acute coronary syndrome Acute lymphocytic leukaemia Acute psychosis Acute tonsillitis Adenocarcinoma Adenoma benign Adhesion Adjustment disorder Affect lability Affective disorder Ageusia Aggression Agitation Agoraphobia Agranulocytosis Akathisia Akinesia Alanine aminotransferase increased Albright's disease Albuminuria Alcohol abuse Alcohol intolerance Alkalosis Alopecia Altered state of consciousness Alveolitis allergic Amaurosis fugax Amblyopia Amenorrhoea Amnesia Amyotrophic lateral sclerosis Anaemia Anaemia macrocytic Anaemia megaloblastic Anaemia vitamin B12 deficiency Anaphylactic shock Anaphylactoid reaction Aneurysm Anger Angina pectoris Angina unstable Angioedema Angiomyolipoma Angiopathy Angle closure glaucoma Anisocytosis Anorectal discomfort Anorectal disorder Anorgasmia Antidiuretic hormone abnormality Antinuclear antibody positive Antisocial behaviour Antisocial personality disorder Anxiety Aortic dissection Aortic embolus Apathy Aphasia Aphthous stomatitis Aplasia Aplastic anaemia Apnoea Appendicitis Application site reaction Apraxia Argininosuccinate synthetase deficiency Arrhythmia Arrhythmia supraventricular Arterial disorder Arterial occlusive disease Arterial stenosis Arteriosclerosis Arteritis Arthralgia Arthritis Arthropathy Ascites Asocial behaviour Aspartate aminotransferase increased Asphyxia Aspiration Assisted fertilisation Asthenia Asthma Ataxia Atelectasis Athetosis Atrial fibrillation Atrial flutter Atrial septal defect Atrioventricular block first degree Atrioventricular block second degree Atrophy Aura Automatism Autonomic nervous system imbalance Autonomic neuropathy Azoospermia Azotaemia Back pain Bacterial infection Balance disorder Balanoposthitis Basal cell carcinoma Basophilia Benign intracranial hypertension Benign neoplasm Benign neoplasm of skin Benign prostatic hyperplasia Biliary colic Binge eating Bladder cancer Bladder dilatation Bladder disorder Bladder pain Bleeding time prolonged Blepharitis Blepharospasm Blindness Blindness transient Blister Blood acid phosphatase increased Blood alkaline phosphatase increased Blood amylase increased Blood antidiuretic hormone abnormal Blood bilirubin increased Blood cholesterol increased Blood creatine phosphokinase increased Blood

creatinine increased Blood disorder Blood electrolytes abnormal  
 Blood glucose decreased Blood glucose increased Blood  
 insulin increased Blood iron decreased Blood lactate dehydrogenase  
 increased Blood phosphorus increased Blood potassium decreased  
 Blood potassium increased Blood pressure abnormal Blood  
 pressure diastolic decreased Blood pressure fluctuation Blood  
 pressure increased Blood pressure systolic decreased Blood  
 prolactin increased Blood testosterone decreased Blood  
 triglycerides increased Blood triglycerides normal Blood urea  
 increased Blood uric acid increased Blood urine Blood urine  
 present Blunted affect Body temperature decreased Body  
 temperature increased Bone disorder Bone pain Bone sarcoma  
 Bradycardia Bradykinesia Bradyphrenia Brain neoplasm  
 Brain neoplasm benign Brain oedema Breast atrophy  
 Breast cancer Breast cyst Breast discharge Breast discomfort  
 Breast disorder Breast disorder female Breast disorder male  
 Breast engorgement Breast enlargement Breast feeding  
 Breast neoplasm Breast pain Breast swelling Breast tenderness  
 Breath odour Bronchiolitis Bronchitis Bronchopneumonia  
 Bronchopneumopathy Bronchospasm Bruxism  
 Buccoglossal syndrome Bulimia nervosa Bundle branch block  
 Bundle branch block left Bundle branch block right  
 Burning sensation Bursitis Cachexia Calculus bladder  
 Calculus urinary Cancer in remission Candidiasis  
 Carbohydrate tolerance decreased Cardiac arrest Cardiac  
 disorder Cardiac failure Cardiac failure congestive Cardiac  
 fibrillation Cardiac flutter Cardiac murmur Cardiac output  
 decreased Cardiac septal defect Cardiac valve disease Cardio-  
 respiratory arrest Cardiomegaly Cardiomyopathy  
 Cardiopulmonary failure Cardiovascular disorder  
 Carotid artery occlusion Carpal tunnel syndrome Cataplexy  
 Cataract Catatonia Cells in urine Cellulitis Cerebral  
 artery embolism Cerebral atrophy Cerebral haemorrhage Cerebral  
 infarction Cerebral ischaemia Cerebrospinal fluid rhinorrhoea  
 Cerebrovascular accident Cerebrovascular disorder  
 Cervical dysplasia Cervicitis Cervix carcinoma Cervix  
 disorder Chapped lips Cheilitis Chest discomfort Chest pain  
 Chills Chloasma Choking Cholecystitis  
 Cholecystitis chronic Cholelithiasis Cholestasis Cholinergic  
 syndrome Chondrodystrophy Chondropathy Chorea  
 Choreoathetosis Chromatopsia Chromaturia Chronic  
 lymphocytic leukaemia Chronic obstructive pulmonary disease  
 Clonus Coagulopathy Coccydynia Cognitive disorder  
 Cogwheel rigidity Cold sweat Colitis Colitis ischaemic  
 Colitis ulcerative Colon cancer Colorectal cancer Coma  
 Completed suicide Compulsions Condition aggravated Confusional  
 state Congenital anomaly Congenital eye disorder Congenital  
 foot malformation Congenital genitourinary abnormality  
 Conjunctival disorder Conjunctival haemorrhage  
 Conjunctival oedema Conjunctivitis Connective tissue  
 disorder Constipation Conversion disorder Convulsion  
 Coordination abnormal Corneal deposits Corneal lesion  
 Coronary artery disease Coronary artery occlusion  
 Costochondritis Cough Cough decreased Crocodile tears  
 syndrome Crying Cyanosis Cystitis Cystitis noninfective



Cytolytic hepatitis      Dandruff      Deafness      Deafness  
 transitory Death Decreased appetite      Decubitus ulcer      Deep vein  
 thrombosis Deficiency anaemia      Dehydration Delirium      Delusion  
 Dementia      Dementia Alzheimer's type      Dementia with Lewy  
 bodies      Dental caries      Dependence Depersonalisation Depressed  
 level of consciousness Depressed mood      Depression Depressive  
 symptom      Derealisation      Dermal cyst Dermatitis atopic Dermatitis  
 bullous      Dermatitis contact      Dermatitis exfoliative Dermatitis  
 infected      Dermoid cyst      Developmental delay      Diabetes mellitus  
     Diabetic coma      Diabetic hyperglycaemic coma Diabetic  
 hyperosmolar coma Diabetic ketoacidosis      Diaphragmatic hernia  
     Diarrhoea      Diarrhoea haemorrhagic Diplopia      Discomfort  
     Disease progression      Disorientation      Disseminated  
 intravascular coagulation      Dissociation      Disturbance in  
 attention      Disturbance in sexual arousal      Diverticulitis  
     Dizziness      Dizziness exertional      Dizziness postural  
     Drooling      Drug abuse Drug dependence      Drug eruption      Drug  
 hypersensitivity Drug ineffective Drug interaction Drug level  
 increased      Drug withdrawal syndrome      Drug withdrawal syndrome  
 neonatal      Dry eye      Dry mouth      Dry skin      Dry throat Duodenal  
 ulcer Duodenal ulcer haemorrhage      Duodenitis Dysarthria Dysentery  
     Dysgeusia      Dysgraphia Dyskinesia Dyslipidaemia  
     Dysmenorrhoea      Dyspareunia Dyspepsia      Dysphagia      Dysphemia  
     Dysphonia      Dysphoria      Dysplasia      Dyspnoea      Dyspnoea  
 exertional Dystonia      Dysuria      Ear disorder      Ear infection  
     Ear pain      Ecchymosis Eclampsia      Eczema      Effusion  
     Ejaculation delayed      Ejaculation disorder      Ejaculation  
 failure      Elastosis perforans      Elderly      Electrocardiogram QRS  
 complex      Electrocardiogram QT prolonged      Electrocardiogram ST  
 segment depression      Electrocardiogram ST segment elevation  
     Electrocardiogram T wave inversion Electrocardiogram abnormal  
     Electrocardiogram change      Electrocardiogram normal  
     Electroencephalogram abnormal      Electrolyte imbalance  
     Elevated mood      Embolism      Emotional distress      Emotional  
 poverty      Emphysema      Encephalopathy      Endocrine disorder  
     Endometrial cancer      Endometrial disorder      Endometrial  
 hyperplasia Endometrial neoplasm      Endometriosis      Energy increased  
     Enteritis      Enuresis      Enzyme abnormality      Eosinophil count  
 increased      Eosinophilia      Eosinophilic pneumonia Epicondylitis  
     Epididymitis      Epilepsy      Epistaxis      Erectile dysfunction  
     Eructation Erythema      Erythema multiforme      Erythema nodosum  
     Erythromelalgia      Erythropenia      Euphoric mood      Exfoliative  
 rash      Exophthalmos      Exostosis      Extensor plantar response  
     Extrapyramidal disorder      Extrasystoles      Extravasation  
     Eye allergy Eye discharge      Eye disorder      Eye haemorrhage  
     Eye infection      Eye inflammation Eye irritation      Eye  
 movement disorder Eye pain      Eye pruritus      Eye swelling  
     Eyelid disorder      Eyelid function disorder      Eyelid oedema  
     Eyelid ptosis      Face oedema Facial pain Facial paresis  
     Faecal incontinence      Faecalith      Faecaloma      Faeces  
 discoloured Faeces hard Fasciitis      Fasting      Fat intolerance  
     Fatigue      Fear      Feeling abnormal      Feeling cold      Feeling hot  
     Feeling jittery      Female sexual dysfunction      Fibroadenoma of  
 breast      Fibrocystic breast disease      Fibrosis      Flank pain Flat  
 affect      Flatulence      Fluid overload      Fluid retention      Flushing

Foetor hepaticus Folliculitis Formication Fungal infection  
 Fungal skin infection Furuncle Gait disturbance  
 Galactorrhoea Gallbladder cancer Gallbladder disorder  
 Gamma-glutamyltransferase increased Gangrene Gastric  
 cancer Gastric dilatation Gastric disorder Gastric  
 haemorrhage Gastric pH decreased Gastric polyps Gastric ulcer  
 Gastric ulcer haemorrhage Gastritis Gastritis haemorrhagic  
 Gastroenteritis Gastrointestinal disorder Gastrointestinal  
 haemorrhage Gastrointestinal infection Gastrointestinal neoplasm  
 Gastrointestinal obstruction Gastrointestinal pain  
 Gastrointestinal stromal tumour Gastrooesophageal reflux  
 disease General symptom Generalised oedema Genital  
 candidiasis Genital discharge Genital disorder female Genital  
 disorder male Genital haemorrhage Gestational hypertension  
 Gingival bleeding Gingival hyperplasia Gingival infection  
 Gingival pain Gingival recession Gingivitis Glaucoma  
 Globulins increased Glomerulonephritis membranous  
 Glossitis Glossodynia Glucose tolerance decreased Glucose  
 tolerance impaired Glycosuria Glycosylated haemoglobin increased  
 Goitre Gout Grand mal convulsion Gravitational oedema  
 Groin pain Gynaecomastia Haemangioma Haematemesis  
 Haematochezia Haematocrit decreased Haematoma Haematuria  
 Haemoglobin Haemoglobin decreased Haemoglobin increased  
 Haemoglobinuria Haemolysis Haemolytic anaemia Haemoptysis  
 Haemorrhage Haemorrhage intracranial Haemorrhagic disorder  
 Haemorrhoids Haemothorax Hallucination Hallucination,  
 auditory Hallucination, visual Hangover Head discomfort Head  
 titubation Headache Hearing impaired Heart disease congenital  
 Heart rate irregular Hemianopia Hemiparesis Hemiplegia  
 Hepatic cirrhosis Hepatic enzyme increased Hepatic failure  
 Hepatic function abnormal Hepatic necrosis Hepatic neoplasm  
 malignant Hepatic steatosis Hepatitis Hepatitis A Hepatitis  
 cholestatic Hepatobiliary disease Hepatocellular injury  
 Hepatomegaly Hepatosplenomegaly Hereditary disorder  
 Hernia Herpes simplex Herpes virus infection Herpes  
 zoster Hiccups Hirsutism Homicidal ideation Hordeolum  
 Hormone level abnormal Hostility Hot flush Hunger  
 Hydrocephalus Hyperacusis Hyperaemia Hyperaesthesia  
 Hyperammonaemia Hyperbilirubinaemia Hypercalcaemia  
 Hyperchloraemia Hyperchlorhydria Hypercholesterolaemia  
 Hyperglycaemia Hyperhidrosis Hyperinsulinism  
 Hyperkalaemia Hyperkeratosis Hyperkinesia  
 Hyperlipidaemia Hypermagnesaemia Hypernatraemia  
 Hyperparathyroidism Hyperpathia Hyperphagia  
 Hyperphosphataemia Hyperplasia Hyperprolactinaemia  
 Hyperpyrexia Hyperreflexia Hypersensitivity  
 Hypersexuality Hypersomnia Hypertension Hypertensive  
 crisis Hyperthermia Hyperthyroidism Hypertonia Hypertonic  
 bladder Hypertrichosis Hypertriglyceridaemia Hypertrophy  
 Hyperuricaemia Hyperuricosuria Hyperventilation Hypnagogic  
 hallucination Hypoaesthesia Hypoaesthesia oral  
 Hypocalcaemia Hypochloraemia Hypocholesterolaemia  
 Hypochromic anaemia Hypoglycaemia Hypogonadism  
 Hypohidrosis Hypokalaemia Hypokinesia Hypomagnesaemia  
 Hypomania Hypomenorrhoea Hyponatraemia Hypophagia

Hypoproteinaemia Hyporeflexia Hypotension Hypothermia  
 Hypothyroidism Hypotonia Hypoventilation Hypovitaminosis  
 Hypovolaemia Hypoxia IIIrd nerve paralysis Idiopathic  
 thrombocytopenic purpura Ileitis Ileus paralytic Ill-defined  
 disorder Illusion Immobile Immune system disorder  
 Immunoglobulins increased Impaired gastric emptying  
 Impaired healing Inappropriate antidiuretic hormone secretion  
 Incontinence Increased appetite Increased bronchial  
 secretion Increased tendency to bruise Induration Infarction  
 Infected cyst Infection Infection susceptibility increased  
 Infertility female Infestation Inflammation Influenza  
 Influenza like illness Inguinal hernia Initial insomnia  
 Injection site mass Injection site pain Injection site  
 phlebitis Injection site reaction Inner ear disorder  
 Insomnia Intention tremor Intentional self-injury  
 Intermittent claudication Interstitial lung disease  
 Intervertebral disc degeneration Intervertebral disc disorder  
 Intervertebral disc protrusion Intervertebral discitis  
 Intestinal functional disorder Intestinal ischaemia  
 Intestinal obstruction Intestinal perforation Intracranial  
 pressure increased Intraocular pressure increased Iritis  
 Iron deficiency Iron deficiency anaemia Irritability  
 Irritable bowel syndrome Ischaemia Ischaemic hepatitis  
 Ischaemic stroke Jaundice Jaundice cholestatic Joint  
 contracture Joint effusion Joint range of motion decreased Joint  
 stiffness Joint swelling Judgement impaired Keratitis  
 Keratoconjunctivitis sicca Keratopathy Ketoacidosis  
 Ketosis Laboratory test abnormal Labyrinthitis  
 Lacrimal disorder Lacrimation decreased Lacrimation increased  
 Lactose intolerance Large intestinal haemorrhage Laryngeal  
 cancer Laryngeal disorder Laryngeal neoplasm Laryngeal  
 oedema Laryngitis Laryngospasm Left ventricular failure  
 Leiomyoma Lens disorder Lenticular opacities Lenticular  
 pigmentation Leriche syndrome Lethargy Leukaemia Leukaemoid  
 reaction Leukocytoclastic vasculitis Leukocytosis Leukoderma  
 Leukopenia Leukoplakia oral Libido decreased Libido increased  
 Lichenoid keratosis Lip and/or oral cavity cancer Lip  
 blister Lip dry Lip swelling Lipoma Livedo  
 reticularis Liver disorder Liver function test abnormal Liver  
 injury Liver tenderness Lividity Lobar pneumonia Localised  
 infection Localised oedema Logorrhoea Loss of consciousness Loss  
 of libido Lower respiratory tract infection Lung adenocarcinoma  
 stage I Lung cancer metastatic Lung disorder Lung infiltration  
 Lung neoplasm malignant Lymphadenitis Lymphadenopathy  
 Lymphatic disorder Lymphocyte count abnormal Lymphocytic  
 leukaemia Lymphocytosis Lymphoedema Lymphoma Lymphopenia  
 Macular degeneration Macule Maculopathy Major depression  
 Malaise Male sexual dysfunction Malignant melanoma  
 Mania Masked facies Mass Mastitis Mediastinal disorder  
 Megacolon Melaena Melanocytic naevus Memory impairment  
 Meningitis Menometrorrhagia Menopausal symptoms Menopause  
 Menorrhagia Menstrual disorder Menstruation delayed  
 Menstruation irregular Mental disability Mental disorder  
 Mental retardation Mental status changes Metabolic  
 alkalosis Metastasis Metastatic neoplasm Methaemoglobinaemia

Metrorrhagia      Microcytic anaemia      Micturition disorder  
 Micturition urgency      Middle ear disorder      Middle ear  
 effusion      Middle insomnia      Migraine with aura      Migraine without  
 aura      Miosis      Mitral valve incompetence      Mobility decreased  
 Monarthritits      Monocytosis      Mood swings      Motion sickness      Mouth  
 ulceration      Movement disorder      Multiple myeloma      Muscle atrophy  
 Muscle contractions involuntary      Muscle contracture  
 Muscle enzyme increased      Muscle haemorrhage      Muscle  
 relaxant therapy      Muscle rigidity      Muscle spasms      Muscle tightness  
 Muscle twitching      Muscular weakness      Musculoskeletal chest pain  
 Musculoskeletal discomfort      Musculoskeletal disorder  
 Musculoskeletal pain      Musculoskeletal stiffness      Mutism  
 Myalgia      Myasthenic syndrome      Mydriasis      Myelitis  
 Myocardial infarction      Myocardial ischaemia      Myocarditis  
 Myoclonus      Myopathy      Myopia      Myositis      Nail  
 discolouration      Nail disorder      Nail infection      Narcolepsy      Nasal  
 congestion      Nasal disorder      Nasal dryness      Nasal oedema      Nasal  
 polyps      Nasopharyngitis      Nausea      Neck pain      Necrosis  
 Necrosis ischaemic      Negativism      Neoplasm malignant  
 Neoplasm prostate      Neoplasm recurrence      Neoplasm skin  
 Nephritis      Nephrolithiasis      Nephropathy      Nephrotic syndrome  
 Nerve root lesion      Nervous system disorder      Nervousness  
 Neuralgia      Neuritis      Neurodermatitis      Neurogenic bladder  
 Neuroleptic malignant syndrome      Neurological symptom  
 Neuroma      Neuropathy peripheral      Neurosis      Neutropenia  
 Neutrophil count decreased      Neutrophil count increased      Night  
 blindness      Night sweats      Nightmare      Nocturia      Nodal arrhythmia  
 Nodule      Normochromic normocytic anaemia      Nuchal rigidity  
 Nystagmus      Obesity      Obsessive thoughts      Obstruction  
 Obstructive airways disorder      Ocular hyperaemia      Oculogyric crisis  
 Oedema      Oedema peripheral      Oesophageal achalasia      Oesophageal  
 carcinoma      Oesophageal disorder      Oesophageal spasm      Oesophageal  
 stenosis      Oesophageal ulcer      Oesophagitis      Oligomenorrhoea  
 Oliguria      Onychomycosis      Opisthotonus      Optic neuritis  
 Oral candidiasis      Oral herpes      Oral neoplasm benign      Oral pain  
 Orchitis noninfective      Orgasm abnormal      Oropharyngeal  
 discomfort      Oropharyngeal pain      Oropharyngeal spasm      Orthostatic  
 hypotension      Osteoarthritis      Osteoarthropathy      Osteodystrophy  
 Osteomyelitis      Osteonecrosis      Osteopenia      Osteoporosis  
 Osteoporotic fracture      Otitis externa      Otitis media  
 Otitis media chronic      Ovarian cancer      Ovarian cyst  
 Ovarian disorder      Pain      Pain in extremity      Pain in jaw      Pallor  
 Palpitations      Pancreatitis acute      Pancytopenia      Panic  
 attack      Panic disorder      Panic disorder with agoraphobia      Panic  
 reaction      Papilloma      Paraesthesia oral      Paralysis      Paranoia  
 Parasomnia      Paresis      Parkinsonian gait      Parkinsonism  
 Paronychia      Parosmia      Parotid gland enlargement  
 Pathological fracture      Pathological gambling      Pelvic pain      Penis  
 disorder      Peptic ulcer      Pericardial effusion      Pericarditis  
 constrictive      Perineal pain      Periodontitis      Periorbital  
 oedema      Peripheral coldness      Peripheral ischaemia      Peripheral  
 vascular disorder      Peritoneal adhesions      Peritonitis      Peroneal nerve  
 palsy      Personality disorder      Petechiae      Petit mal epilepsy  
 Phaeochromocytoma      Pharyngeal disorder      Pharyngeal erythema  
 Pharyngeal oedema      Pharyngitis      Phlebitis      Phlebitis superficial

Phobia Phonological disorder Photophobia Photopsia  
 Photosensitivity allergic reaction Photosensitivity reaction  
 Pigmentation disorder Piloerection Pituitary tumour  
 benign Plasmacytoma Platelet count decreased Pleural  
 disorder Pleural effusion Pleural fibrosis Pleurisy Pneumonia  
 Pneumonia aspiration Pneumothorax Poisoning  
 Poliomyelitis Pollakiuria Polyarteritis nodosa  
 Polycythaemia Polydipsia Polymenorrhoea Polymyalgia  
 rheumatica Polyp Polyuria Porphyria Post procedural infection  
 Postmenopausal haemorrhage Postpartum disorder Postural  
 orthostatic tachycardia syndrome Posture abnormal Pre-eclampsia  
 Precocious puberty Pregnancy test false positive  
 Pregnancy test positive Premature baby Premature  
 delivery Premature ejaculation Premenstrual syndrome Pressure of  
 speech Presyncope Priapism Proctalgia Productive cough  
 Prolactinoma Prostate cancer Prostatic adenoma Prostatic  
 disorder Prostatitis Protein urine present Proteinuria Protrusion  
 tongue Prurigo Pruritus Pruritus generalised Pruritus  
 genital Pseudolymphoma Psoriasis Psychiatric symptom  
 Psychomotor retardation Psychosomatic disease Psychotic  
 behaviour Psychotic disorder Puberty Pulmonary congestion  
 Pulmonary embolism Pulmonary fibrosis Pulmonary  
 function test decreased Pulmonary hypertension Pulmonary oedema  
 Pulse absent Pupils unequal Purpura Pyelonephritis  
 Pyoderma Pyuria Rales Rash erythematous Rash generalised  
 Rash maculo-papular Rash papular Rash pustular Rash  
 vesicular Raynaud's phenomenon Rectal cancer Rectal  
 haemorrhage Rectal tenesmus Red blood cell abnormality Red blood  
 cell count decreased Red blood cell sedimentation rate increased  
 Reflux oesophagitis Regressive behaviour Regurgitation  
 Renal artery stenosis Renal colic Renal cyst Renal failure  
 acute Renal impairment Renal neoplasm Renal pain Reproductive  
 tract disorder Respiratory alkalosis Respiratory arrest  
 Respiratory depression Respiratory disorder Respiratory  
 distress Respiratory failure Respiratory tract congestion  
 Respiratory tract infection Respiratory tract infection viral  
 Restless legs syndrome Retching Retinal artery occlusion  
 Retinal detachment Retinal disorder Retinal haemorrhage  
 Retinal vascular disorder Retinitis pigmentosa Retrograde  
 ejaculation Retroperitoneal fibrosis Rhabdomyolysis Rheumatoid  
 arthritis Rhinitis Rhinitis allergic Rhinitis seasonal Rhinorrhoea  
 Rhonchi Rosacea Rotator cuff syndrome Sacroiliitis  
 Saliva altered Salivary duct obstruction Salivary gland  
 disorder Salivary gland enlargement Salivary hypersecretion  
 Salpingitis Sarcoidosis Sarcoma Scab Schizoaffective  
 disorder Schizophrenia Schizophreniform disorder Sciatica  
 Scleral disorder Scleritis Scotoma Seasonal allergy  
 Seborrhoeic dermatitis Seborrhoeic keratosis Sedation  
 Sensation of foreign body Sensation of heaviness Sensory  
 disturbance Sensory loss Sepsis Septic shock Serum  
 sickness Severe acute respiratory syndrome Sexual dysfunction  
 Shock Sialoadenitis Sicca syndrome Sick sinus syndrome  
 Sinus arrhythmia Sinus bradycardia Sinus congestion Sinus  
 disorder Sinus headache Sinus tachycardia Sinusitis Skin  
 burning sensation Skin cancer Skin discolouration Skin disorder

Skin exfoliation Skin hyperpigmentation Skin hypertrophy Skin  
 infection Skin irritation Skin lesion Skin mass Skin odour  
 abnormal Skin papilloma Skin striae Skin ulcer Sleep apnoea  
 syndrome Sleep attacks Sleep disorder Sleep paralysis Sleep  
 talking Sluggishness Small intestinal obstruction Sneezing  
 Snoring Social avoidant behaviour Somnambulism  
 Somnolence Speech disorder Sphincter of Oddi dysfunction  
 Spinal osteoarthritis Spine malformation Splenomegaly  
 Spondylitis Sputum increased Squamous cell carcinoma  
 Status epilepticus Stevens-Johnson syndrome Sticky skin  
 Stomach dilation procedure Stomatitis Strabismus Stress  
 Stridor Stupor Subarachnoid haemorrhage  
 Subcutaneous abscess Subcutaneous nodule Subdural  
 haematoma Subileus Sudden death Suicidal ideation Suicide  
 attempt Superior sagittal sinus thrombosis Supraventricular  
 extrasystoles Supraventricular tachycardia Surgery  
 Suspiciousness Swelling Swelling face Swollen tongue  
 Syncope Synostosis Synovitis Systemic lupus erythematosus  
 Tachycardia Tachypnoea Tardive dyskinesia Tearfulness  
 Telangiectasia Tenderness Tendinous contracture Tendonitis  
 Tenosynovitis Tension Tension headache Teratogenicity  
 Terminal insomnia Testicular disorder Testicular pain  
 Testicular swelling Tetany Therapeutic response  
 decreased Therapeutic response increased Thinking abnormal  
 Thirst Thought blocking Throat irritation Throat tightness  
 Thrombocytopenia Thrombocytopenic purpura Thrombocytosis  
 Thrombophlebitis Thrombosis Thrombotic thrombocytopenic  
 purpura Thyroid adenoma Thyroid cancer Thyroid neoplasm  
 Thyroiditis Tic Tinnitus Tongue coated Tongue  
 discolouration Tongue disorder Tongue dry Tongue oedema  
 Tongue paralysis Tongue spasm Tongue ulceration Tonsillar  
 hypertrophy Tonsillitis Tooth abscess Tooth disorder Tooth  
 impacted Tooth infection Tooth malformation Toothache  
 Torsade de pointes Torticollis Toxic epidermal necrolysis  
 Tracheal disorder Tracheobronchitis Transaminases increased  
 Transient ischaemic attack Tremor Trismus Tuberculin  
 test positive Tubulointerstitial nephritis Ulcer Ulcer haemorrhage  
 Ulcerative keratitis Umbilical hernia Unevaluable event  
 Unintended pregnancy Unresponsive to stimuli Upper  
 respiratory tract infection Upper-airway cough syndrome Urethral  
 disorder Urethral pain Urethritis Urinary hesitation  
 Urinary incontinence Urinary retention Urinary tract disorder  
 Urinary tract infection Urinary tract obstruction Urine  
 abnormality Urine analysis abnormal Urine flow decreased Urine  
 output increased Urosepsis Urticaria Uterine disorder Uterine  
 haemorrhage Uterine inflammation Uterine leiomyoma Uterine neoplasm  
 Uterine spasm Uterovaginal prolapse VIIIth nerve paralysis  
 Vaginal discharge Vaginal haemorrhage Vaginal infection  
 Vaginal inflammation Varicose vein Vascular headache  
 Vascular insufficiency Vascular purpura Vasculitis  
 Vasoconstriction Vasodilation procedure Vasospasm Vein  
 disorder Venous thrombosis Ventricular arrhythmia Ventricular  
 extrasystoles Ventricular failure Ventricular fibrillation  
 Ventricular hypertrophy Ventricular tachycardia  
 Vertigo Vestibular ataxia Vestibular disorder Viral

diarrhoea Viral infection Vision blurred Visual acuity reduced  
Visual impairment Vitamin B12 deficiency Vitreous detachment  
Vitreous floaters Vocal cord paralysis Vomiting Vulval  
disorder Vulvovaginal candidiasis Vulvovaginal dryness  
Vulvovaginal mycotic infection Vulvovaginal pruritus  
Vulvovaginitis Water intoxication Waxy flexibility  
Weight decreased Weight fluctuation Weight increased  
Wheezing White blood cell count decreased White blood cell  
count increased White blood cell disorder White blood cells  
urine positive Withdrawal bleed Withdrawal syndrome Wound  
infection Xerophthalmia Xerosis Yawning

\*\*\*\*\*  
\*\*\*\*\*

System N amino acid transporter 1 - Group: Transporter

Treated with:

l-histidine: approved, nutraceutical small molecule (0 associated side effects) The actions of supplemental L-histidine are entirely unclear. It may have some immunomodulatory as well as antioxidant activity. L-histidine may be indicated for use in some with rheumatoid arthritis. It is not indicated for treatment of anemia or uremia or for lowering serum cholesterol.

l-glutamine: approved, nutraceutical small molecule (0 associated side effects) Used for nutritional supplementation, also for treating dietary shortage or imbalance.

l-asparagine: approved, nutraceutical small molecule (0 associated side effects) Used for nutritional supplementation, also for treating dietary shortage or imbalance.

known side effects mediated through drugs targeting this protein:

\*\*\*\*\*  
\*\*\*\*\*

Excitatory amino acid transporter 3 - Group: Transporter

Treated with:

l-aspartic acid: approved, nutraceutical small molecule (0 associated side effects) There is no support for the claim that aspartates are exercise performance enhancers, i.e. ergogenic aids.

l-glutamic acid: approved, nutraceutical small molecule (0 associated side effects) Considered to be nature's "Brain food" by improving mental capacities; helps speed the healing of ulcers; gives a "lift" from fatigue; helps control alcoholism, schizophrenia and the craving for sugar.

known side effects mediated through drugs targeting this protein:

\*\*\*\*\*  
\*\*\*\*\*

Solute carrier organic anion transporter family member 4A1 - Group: Transporter

Treated with:

liothyronine: approved small molecule (0 associated side effects) Used as replacement or supplemental therapy in patients with hypothyroidism of any etiology, except transient hypothyroidism during the recovery phase of subacute thyroiditis.

conjugated estrogens: approved small molecule (219 associated side effects) For the treatment of moderate to severe vasomotor symptoms associated with the menopause, atrophic vaginitis, osteoporosis, hypoestrogenism due to hypogonadism, castration, primary ovarian failure, breast cancer (for palliation only), and Advanced androgen-dependent carcinoma of the prostate (for palliation only)

digoxin: approved small molecule (56 associated side effects) For the treatment and management of congestive cardiac insufficiency, arrhythmias and heart failure.

dinoprostone: approved small molecule (0 associated side effects) For the termination of pregnancy during the second trimester (from the 12th through the 20th gestational week as calculated from the first day of the last normal menstrual period), as well as for evacuation of the uterine contents in the management of missed abortion or intrauterine fetal death up to 28 weeks of gestational age as calculated from the first day of the last normal menstrual period. Also used in the management of nonmetastatic gestational trophoblastic disease (benign hydatidiform mole). Other indications include improving the cervical inducibility (cervical "ripening") in pregnant women at or near term with a medical or obstetrical need for labor induction, and the management of postpartum hemorrhage.

penicillin g: approved small molecule (0 associated side effects) For use in the treatment of severe infections caused by penicillin G-susceptible microorganisms when rapid and high penicillin levels are required such as in the treatment of septicemia, meningitis, pericarditis, endocarditis and severe pneumonia.

liotrix: approved small molecule (0 associated side effects) May be used to treat primary, secondary or tertiary hypothyroidism. May also be used to suppress thyroid stimulating hormone (TSH) secretion in patients with simple (nontoxic) goiter, subacute or chronic lymphocytic thyroiditis multinodular goiter, and in the management of thyroid cancer. May be used in conjunction with other antithyroid agents to treat thyrotoxicosis to prevent goitrogenesis and hypothyroidism. May also be used for differential diagnosis of suspected mild hyperthyroidism or thyroid gland autonomy.

taurocholic acid: experimental small molecule (0 associated side effects)

257 known side effects mediated through drugs targeting this protein:

5q minus syndrome  
Abdominal discomfort    Abdominal distension  
Abdominal pain    Abscess    Acne    Acute coronary syndrome  
Affect lability    Agitation    Alopecia    Amenorrhoea  
Anaphylactic shock    Anaphylactoid reaction    Angioedema  
Angiopathy    Anxiety    Apathy    Arrhythmia    Arthralgia  
Arthropathy    Asthenia    Asthma    Atrial tachycardia  
Atrioventricular block complete    Atrioventricular block first degree  
Atrioventricular block second degree    Atrioventricular dissociation  
Back pain    Benign neoplasm    Bladder pain  
Blindness    Blood glucose decreased    Blood glucose increased  
Blood pressure increased    Blood triglycerides



increased Body temperature increased Bone disorder Bone pain  
 Bradycardia Breast discharge Breast discomfort Breast disorder  
 Breast enlargement Breast mass Breast neoplasm Breast pain  
 Breast swelling Breast tenderness Bronchitis Candidiasis  
 Carbohydrate tolerance decreased Cardiac arrest Cardiac  
 disorder Cardioactive drug level Cerebrovascular accident  
 Cervical discharge Cervix disorder Chest pain Chills  
 Chloasma Chorea Colitis ischaemic Conduction disorder  
 Confusional state Conjunctivitis Connective tissue disorder  
 Constipation Coronary artery thrombosis Cough Cystitis  
 Cystitis noninfective Death Decreased appetite Deep vein  
 thrombosis Delirium Depression Dermatitis Diarrhoea Discomfort  
 Dissociation Dizziness Drug interaction Dry eye  
 Dysmenorrhoea Dyspepsia Dysplasia Dyspnoea Dysuria  
 Ear pain Ecchymosis Ectropion of cervix Electrocardiogram  
 PR prolongation Electrocardiogram ST segment Electrocardiogram ST  
 segment depression Electrocardiogram change Embolism  
 Embolism venous Endometrial cancer Endometrial  
 hypertrophy Endometriosis Epilepsy Erythema Erythema  
 multiforme Erythema nodosum Extrasystoles Eye disorder  
 Fatigue Feeling abnormal Fibrocystic breast disease Flat  
 affect Flatulence Fluid retention Galactorrhoea Gallbladder  
 disorder Gastrointestinal disorder Gastrointestinal necrosis  
 Gastrointestinal pain Generalised oedema Genital discharge  
 Glucose tolerance decreased Glucose tolerance impaired  
 Gynaecomastia Haemangioma Haemoptysis Haemorrhagic disorder  
 Hallucination Headache Hepatic function abnormal  
 Hepatobiliary disease Hirsutism Hypercalcaemia  
 Hyperglycaemia Hyperlipidaemia Hypernatraemia  
 Hypersensitivity Hypertension Hypertonia  
 Hypertriglyceridaemia Hypertrophy Hypoaesthesia  
 Hypocalcaemia Hypotension Hypothyroidism Infarction  
 Infection Influenza Injection site pain Insomnia  
 Intestinal ischaemia Irritability Ischaemia Jaundice  
 Jaundice cholestatic Lacrimal disorder Lacrimation increased  
 Laryngitis Leiomyoma Loss of consciousness Mass Meningioma  
 benign Menorrhagia Menstrual disorder Mental disorder  
 Mesenteric vascular insufficiency Metrorrhagia Migraine  
 Mood swings Mouth ulceration Muscle rigidity Muscle spasms  
 Musculoskeletal discomfort Musculoskeletal pain  
 Musculoskeletal stiffness Myalgia Myocardial infarction  
 Nausea Neck pain Necrosis Neoplasm Nervous system  
 disorder Nervousness Neuritis Neuropathy peripheral Nipple pain  
 Nodule Nuchal rigidity Oedema Oedema peripheral Optic  
 neuritis Osteoarthritis Ovarian cancer Pain in extremity  
 Palpitations Pancreatitis Paraesthesia Pelvic pain  
 Pharyngitis Phlebitis Pigmentation disorder Poisoning  
 Pollakiuria Porphyria Precocious puberty Pruritus genital  
 Psychotic disorder Puberty Pulmonary embolism  
 Pulmonary function test decreased Purpura Rash generalised  
 Rash maculo-papular Respiratory depression Respiratory tract  
 infection Rhinitis Sensory loss Shock Sinus bradycardia  
 Sinusitis Smear cervix abnormal Somnolence Stomatitis  
 Subcutaneous nodule Swelling Syncope Tachycardia  
 Tenderness Tension Thrombocytopenia Thrombophlebitis

superficial Thrombosis Tooth abscess Ulcer Upper respiratory  
tract infection Urethral disorder Urinary tract disorder Urticaria  
Uterine cancer Uterine cervical erosion Uterine leiomyoma  
Uterine spasm Vaginal haemorrhage Varicose vein  
Vasodilation procedure Venous thrombosis Ventricular  
extrasystoles Ventricular fibrillation Ventricular  
tachycardia Vertigo Visual acuity reduced Visual impairment  
Vomiting Vulvovaginal candidiasis Vulvovaginal mycotic  
infection Vulvovaginal pruritus Weight increased Withdrawal bleed  
Xanthopsia

\*\*\*\*\*  
\*\*\*\*\*

Photoreceptor outer segment all-trans retinol dehydrogenase - Group:  
Enzyme

Treated with:

vitamin a: approved, nutraceutical small molecule (18 associated  
side effects) For the treatment of vitamin A deficiency.

18 known side effects mediated through drugs targeting this protein:

Agitation Anaphylactic shock Anaphylactoid reaction Angioedema  
Anxiety Death Dermatitis Diplopia Dizziness Dyspnoea  
Erythema Headache Hypersensitivity Pruritus Rash Shock  
Urticaria Wheezing

\*\*\*\*\*  
\*\*\*\*\*

Peroxisome proliferator-activated receptor delta - Group: Receptor  
Treated with:

icosapent: approved, nutraceutical small molecule (0 associated  
side effects) EPA can be used for lowering elevated triglycerides  
in those who are hyperglyceridemic. In addition, EPA may play a  
therapeutic role in patients with cystic fibrosis by reducing  
disease severity and may play a similar role in type 2 diabetics in  
slowing the progression of diabetic nephropathy.

treprostinil: approved small molecule (92 associated side  
effects) For use as a continuous subcutaneous infusion or  
intravenous infusion (for those not able to tolerate a subcutaneous  
infusion) for the treatment of pulmonary arterial hypertension in  
patients with NYHA Class II-IV symptoms to diminish symptoms  
associated with exercise.

sulindac: approved small molecule (148 associated side  
effects) For acute or long-term use in the relief of signs and  
symptoms of osteoarthritis, rheumatoid arthritis, ankylosing  
spondylitis, acute painful shoulder (acute subacromial  
bursitis/supraspinatus tendinitis), and acute gouty arthritis.

bezafibrate: approved small molecule (57 associated side  
effects) For the treatment of primary hyperlipidaemia types IIa,  
IIb, III, IV and V (Fredrickson classification) corresponding to  
groups I, II and III of the European Atherosclerosis Society  
guidelines - when diet alone or improvements in lifestyle such as  
increased exercise or weight reduction do not lead to an adequate  
response. Also for the treatment of secondary hyperlipidaemias, e.g.  
severe hypertriglyceridemias, when sufficient improvement does not  
occur after correction of the underlying disorder (e.g. diabetes  
mellitus).

heptyl-beta-d-glucopyranoside: experimental small molecule  
(0 associated side effects)  
(11e)-octadec-11-enoic acid: experimental small molecule (0  
associated side effects)  
(2s)-2-{3-[(2-fluoro-4-(trifluoromethyl)phenyl)carbonyl]amino)methyl}-4-  
methoxybenzyl}butanoic acid: experimental small molecule (0  
associated side effects)  
2-({3-(3,4-dihydroisoquinolin-2(1h)-  
ylsulfonyl)phenyl}carbonyl)amino)benzoic acid: experimental  
small molecule (0 associated side effects)  
3-{5-methoxy-1-[(4-methoxyphenyl)sulfonyl]-1h-indol-3-yl}propanoic  
acid: experimental small molecule (0 associated side effects)  
{4-[3-(4-acetyl-3-hydroxy-2-propylphenoxy)propoxy]phenoxy}acetic  
acid: experimental small molecule (0 associated side effects)

211 known side effects mediated through drugs targeting this  
protein:

Abdominal pain Acute coronary syndrome Acute psychosis  
Ageusia Agranulocytosis Alanine aminotransferase increased  
Alopecia Anaemia Anaphylactic shock Angioedema  
Anxiety Aplastic anaemia Arrhythmia Arthralgia Aspartate  
aminotransferase increased Asthenia Back pain Blood alkaline  
phosphatase increased Blood creatine phosphokinase increased Blood  
creatinine increased Blood culture positive Body temperature  
increased Bone pain Bradycardia Bronchitis Bronchospasm  
Cardiac failure Cardiac failure congestive Cellulitis  
Cellulitis gangrenous Chest pain Chills Cholecystitis  
Cholelithiasis Cholestasis Chromaturia Colitis Coma  
Conjunctivitis Connective tissue disorder Constipation  
Convulsion Cough Crystal urine Crystalluria Deafness  
Decreased appetite Dehydration Depressed level of  
consciousness Dermatitis Dermatitis exfoliative Diarrhoea  
Discomfort Disease progression Disseminated intravascular  
coagulation Dizziness Drug rash with eosinophilia and systemic  
symptoms Dysgeusia Dyspepsia Dyspnoea Dysuria Ecchymosis  
Eczema Effusion Embolism Eosinophilia Epistaxis  
Erectile dysfunction Erythema Erythema multiforme  
Fasciitis Fatigue Feeling abnormal Flatulence Flushing  
Gastric disorder Gastritis Gastroenteritis Gastrointestinal  
haemorrhage Gastrointestinal pain Gastrointestinal perforation  
Glossitis Gout Gynaecomastia Haematoma Haematuria  
Haemoglobin Haemolytic anaemia Haemoptysis Haemorrhage  
Headache Hearing impaired Hepatic failure Hepatic function  
abnormal Hepatitis Hyperglycaemia Hyperhidrosis  
Hyperkalaemia Hypersensitivity Hypertension  
Hypokalaemia Hypotension Hypoxia Ill-defined disorder  
Induration Infection Influenza Infusion site reaction  
Insomnia Jaundice Leukocytoclastic vasculitis  
Leukocytosis Leukopenia Liver function test abnormal Loss  
of consciousness Lymphadenitis Malaise Melaena Meningitis  
Meningitis aseptic Migraine Mixed connective tissue  
disease Muscle spasms Muscular weakness Musculoskeletal  
discomfort Myalgia Myocardial infarction Myositis Nausea  
Neck pain Necrotising fasciitis Nephritis Nephrolithiasis

Nephrotic syndrome      Nervousness      Neuritis      Neuropathy  
 peripheral      Neutropenia      Oedema      Oedema peripheral      Oropharyngeal  
 pain      Pain      Pain in extremity      Pain in jaw      Pallor      Palpitations  
 Pancreatitis      Pancytopenia      Paraesthesia      Peptic  
 ulcer      Pharyngitis      Photosensitivity reaction      Pleural disorder  
 Pleural effusion      Pneumonia      Protein urine present      Proteinuria  
 Prothrombin level increased      Pruritus      Pseudomonal sepsis  
 Pseudomonas infection      Psychotic disorder      Pulmonary  
 embolism      Pulmonary hypertension      Purpura      Rash      Rectal  
 haemorrhage      Renal failure      Renal failure acute      Renal impairment  
 Retinal disorder      Rhabdomyolysis      Rhinitis      Sepsis      Shock  
 Sinusitis      Somnolence      Stomatitis      Stupor      Swelling  
 Syncope      Systemic lupus erythematosus      Tachycardia      Tenderness  
 Tenosynovitis      Tension      Throat irritation      Thrombocytopenia  
 Thrombophlebitis      Thrombosis      Tinnitus      Toxic epidermal  
 necrolysis      Transaminases increased      Tubulointerstitial nephritis  
 Ulcer      Urethral disorder      Urinary tract disorder      Urinary tract  
 infection      Urine colour abnormal      Urine output      Urticaria  
 Vaginal haemorrhage      Vascular purpura      Vasculitis  
 Vasodilation procedure      Vertigo      Viral infection      Vision  
 blurred      Visual impairment      Vomiting      Wheezing

\*\*\*\*\*  
 \*\*\*\*\*

ABC transporter, periplasmic substrate-binding protein - Group:  
 Transporter  
 Treated with:  
 1-methoxy-2-[2-(2-methoxy-ethoxy)-ethane]:      experimental      small  
 molecule      (0 associated side effects)

known side effects mediated through drugs targeting this protein:

\*\*\*\*\*  
 \*\*\*\*\*

Calcitonin receptor - Group: Receptor  
 Treated with:  
 salmon calcitonin:      approved      biotech      (165 associated side  
 effects)      For the treatment of post-menopausal osteoporosis  
 pramlintide:      approved      biotech      (17 associated side effects)  
 For the treatment of type 1 and type 2 diabetes mellitus as an  
 adjunct to preprandial insulin therapy in patients without adequate  
 glycemic control of insulin therapy.

167 known side effects mediated through drugs targeting this protein:

Abdominal pain      Acute coronary syndrome      Agitation      Alopecia  
 Anaemia      Anaphylactic shock      Anaphylactoid reaction  
 Angina pectoris      Angiopathy      Anxiety      Aortic dissection  
 Arrhythmia      Arthralgia      Arthritis      Arthropathy      Asthenia      Back  
 pain      Bladder pain      Blindness      Body temperature increased  
 Breath sounds abnormal      Bronchitis      Bronchospasm      Bundle  
 branch block      Cardiovascular disorder      Cataract  
 Cerebrovascular accident      Chest pain      Chills  
 Cholelithiasis      Congenital eye disorder      Conjunctivitis  
 Constipation      Cough      Crocodile tears syndrome      Cystitis  
 Cystitis noninfective      Deafness      Death      Decreased appetite

Dermatitis Diarrhoea Discomfort Dizziness Dry mouth Dry  
 skin Dysgeusia Dyspepsia Dysphonia Dyspnoea Ear disorder  
 Ear pain Eczema Epistaxis Erythema Eye disorder  
 Fatigue Feeling hot Flatulence Flushing Gastritis  
 Gastrointestinal disorder Gastrointestinal pain Glaucoma  
 Goitre Haematuria Haemoglobin Haemorrhage Headache  
 Hearing impaired Hepatitis Hot flush Hypercalcaemia  
 Hyperhidrosis Hyperparathyroidism Hyperparathyroidism  
 secondary Hypersensitivity Hypertension Hyperthyroidism  
 Hypocalcaemia Hypoglycaemia Hypotension Immune system  
 disorder Increased appetite Infarction Infection Infestation  
 Influenza Injection site reaction Insomnia Lacrimal  
 disorder Lacrimation increased Lymphadenopathy Mediastinal  
 disorder Menopausal symptoms Migraine Musculoskeletal  
 discomfort Musculoskeletal stiffness Myalgia Myocardial  
 infarction Nasal congestion Nasal discomfort Nasal dryness Nasal  
 mucosal disorder Nasal odour Nasal oedema Nasal polyps Nasal  
 septum ulceration Nausea Nephrolithiasis Nervous system  
 disorder Neuralgia Obstruction Oedema Osteoarthritis  
 Osteoporotic fracture Pain in extremity Pallor  
 Palpitations Paraesthesia Parosmia Periorbital  
 oedema Pharyngitis Pneumonia Polymyalgia rheumatica Polyp  
 Polyuria Pruritus Purpura Pyelonephritis Rales Rash  
 erythematous Rash generalised Renal tubular disorder Respiratory  
 tract infection Rhinitis allergic Rhinitis ulcerative Scab Shock  
 Sinusitis Skin disorder Skin ulcer Sneezing Somnolence  
 Swelling Swollen tongue Tachycardia Tenderness Tetany  
 Thirst Thrombophlebitis Tinnitus Ulcer Upper respiratory  
 tract infection Urine abnormality Urine analysis abnormal Urine  
 output increased Vascular purpura Vertigo Vestibular disorder  
 Vision blurred Visual acuity reduced Visual impairment  
 Vitreous floaters Vomiting Weight increased Wound haemorrhage

\*\*\*\*\*  
 \*\*\*\*\*

Mu-type opioid receptor - Group: Receptor

Treated with:

tramadol: approved small molecule (490 associated side effects) Indicated in the treatment of moderate to severe pain. Consider for those prone to constipation or respiratory depression. Tramadol is used to treat postoperative, dental, cancer, and acute musculoskeletal pain and as an adjuvant to NSAID therapy in patients with osteoarthritis.

morphine: approved small molecule (208 associated side effects) For the relief and treatment of severe pain.

codeine: illicit, approved small molecule (43 associated side effects) For treatment and management of pain (Systemic), also used as an Antidiarrheal and as a cough suppressant.

hydromorphone: illicit, approved small molecule (355 associated side effects) For the relief of moderate to severe pain such as that due to surgery, cancer, trauma/injury, or burns.

methadone: approved small molecule (87 associated side effects) For the treatment of dry cough, drug withdrawal syndrome, opioid type drug dependence, and pain.

oxycodone: illicit,approved small molecule (215 associated side effects) For the treatment of diarrhoea, pulmonary oedema and for the relief of moderate to moderately severe pain.

levallorphan: approved small molecule (0 associated side effects) For the complete or partial reversal of narcotic depression, including respiratory depression, induced by opioids.

butorphanol: illicit,approved small molecule (122 associated side effects) For the relief of moderate to severe pain.

propoxyphene: illicit,approved small molecule (79 associated side effects) For the relief of mild to moderate pain

pentazocine: approved small molecule (51 associated side effects) For the relief of moderate to severe pain.

naltrexone:approved small molecule (238 associated side effects) Used as an adjunct to a medically supervised behaviour modification program in the maintenance of opiate cessation in individuals who were formerly physically dependent on opiates and who have successfully undergone detoxification. Also used for the management of alcohol dependence in conjunction with a behavioural modification program.

sufentanil:approved small molecule (38 associated side effects) Used as an analgesic adjunct in anesthesia and as a primary anesthetic drug in procedures requiring assisted ventilation and in the relief of pain.

alfentanil:illicit,approved small molecule (36 associated side effects) For the management of postoperative pain and the maintenance of general anesthesia.

fentanyl: illicit,approved small molecule (393 associated side effects) For the treatment of cancer patients with severe pain that breaks through their regular narcotic therapy.

loperamide:approved small molecule (41 associated side effects) For the control and symptomatic relief of acute nonspecific diarrhea and of chronic diarrhea associated with inflammatory bowel disease or gastroenteritis. Also used for reducing the volume of discharge from ileostomies.

nalbuphine:approved small molecule (68 associated side effects) For the relief of moderate to severe pain.

levorphanol: approved small molecule (0 associated side effects) For the management of moderate to severe pain or as a preoperative medication where an opioid analgesic is appropriate

remifentanyl: approved small molecule (134 associated side effects) For use during the induction and maintenance of general anesthesia.

ondansetron: approved small molecule (122 associated side effects) For the prevention of nausea and vomiting associated with emetogenic cancer chemotherapy, postoperation, and radiation. Also used for the treatment of postoperative nausea and vomiting.

anileridine: illicit,approved small molecule (0 associated side effects) For treatment and management of pain (systemic) and for use as an anesthesia adjunct.

buprenorphine: illicit,approved small molecule (170 associated side effects) For the treatment of moderate to severe pain, peri-operative analgesia, and opioid dependence.

hydrocodone: illicit,approved small molecule (0 associated side effects) For relief of moderate to moderately severe pain.

Also used for the symptomatic relief of nonproductive cough, alone or in combination with other antitussives or expectorants.

diphenoxylate: illicit,approved small molecule (0 associated side effects) For as adjunctive therapy in the management of diarrhea

naloxone: approved small molecule (54 associated side effects)

For the complete or partial reversal of narcotic depression, including respiratory depression, induced by opioids including natural and synthetic narcotics, propoxyphene, methadone and the narcotic-antagonist analgesics: nalbuphine, pentazocine and butorphanol.

oxymorphone: approved small molecule (0 associated side effects) For the treatment of moderate-to-severe pain.

dezocine: approved small molecule (0 associated side effects)

Indicated in the treatment of moderate to severe pain.

levomethadyl acetate: approved small molecule (0 associated side effects) For the treatment and management of opiate dependence. It is sometimes used to treat severe pain in terminal patients.

3-methylthiofentanyl: illicit,experimental small molecule (0 associated side effects)

dimethylthiambutene: illicit,experimental small molecule (0 associated side effects) Dimethylthiambutene is an opioid analgesic previously used in moderate pain relief.

heroin: illicit,experimental small molecule (0 associated side effects) Used in the treatment of acute pain, myocardial infarction, acute pulmonary oedema, and chronic pain.

ethylmorphine: illicit,approved small molecule (0 associated side effects) Ethylmorphine is an analgesic used for pain relief.

etorphine: illicit,experimental small molecule (0 associated side effects)

carfentanil: illicit,experimental small molecule (0 associated side effects) Carfentanil is similar (but more potent) to the opioid analgesic fentanyl. It is used as a tranquilizer for large animals.

diprenorphine: illicit,experimental small molecule (0 associated side effects) Diprenorphine is used to reverse the effects of the super-potent opioid analgesics such as etorphine and carfentanil that are used for tranquilizing large animals in veterinary medicine. Not used in humans.

dihydromorphine: illicit,experimental small molecule (0 associated side effects) Dihydromorphine is an opioid analgesic used for moderate to severe pain relief.

3-methylfentanyl:illicit,experimental small molecule (0 associated side effects)

alvimopan: approved small molecule (12 associated side effects)

Used to accelerate the time to upper and lower gastrointestinal recovery following partial large or small bowel resection surgery with primary anastomosis. Also investigated for use in the treatment of pain (acute or chronic).

825 known side effects mediated through drugs targeting this protein:

Abdominal discomfort    Abdominal distension    Abdominal pain lower  
Abdominal pain upper    Abdominal tenderness    Abnormal

behaviour Abnormal dreams Abnormal faeces Abortion missed  
Abscess Accommodation disorder Acidosis Acne Acute  
coronary syndrome Acute myocardial infarction Adrenal insufficiency  
Affect lability Ageusia Aggression Agitation  
Agranulocytosis Akathisia Alanine aminotransferase decreased  
Alanine aminotransferase increased Albuminuria Alcohol abuse  
Alcohol poisoning Alcohol withdrawal syndrome Alcoholism  
Alopecia Altered state of consciousness Amblyopia  
Amenorrhoea Amnesia Anaemia Anal fissure Analgesic  
therapy Anaphylactic shock Anaphylactoid reaction Aneurysm  
Angina pectoris Angina unstable Angioedema Angiopathy  
Anogenital dysplasia Anorectal disorder Anorgasmia  
Anosmia Anxiety Aortic aneurysm Aortic dissection  
Apathy Aphasia Aphthous stomatitis Apnoea  
Appendicitis Appetite disorder Application site reaction  
Arrhythmia Arterial occlusive disease Arteriosclerosis  
Arteriosclerosis coronary artery Arthralgia Arthritis  
Arthropathy Ascites Aspartate aminotransferase increased  
Asthma Asthma Ataxia Atelectasis Atrial  
fibrillation Atrial flutter Atrioventricular block complete  
Atrioventricular block first degree Atrioventricular block  
second degree Atrophy Azotaemia Back disorder Back pain  
Bacterial infection Balance disorder Bedridden Benign  
breast neoplasm Bezoar Biliary colic Biliary tract disorder  
Bipolar I disorder Bipolar disorder Bladder pain  
Bladder spasm Bleeding time prolonged Blepharitis  
Blindness Blindness transient Blister Blood alkaline  
phosphatase increased Blood amylase increased Blood bilirubin  
increased Blood cholesterol increased Blood creatine phosphokinase  
increased Blood creatinine increased Blood creatinine normal  
Blood glucose abnormal Blood glucose increased Blood  
lactate dehydrogenase increased Blood potassium abnormal Blood  
potassium decreased Blood potassium increased Blood pressure  
fluctuation Blood pressure increased Blood sodium increased Blood  
testosterone decreased Blood triglycerides increased Blood urea  
increased Blood uric acid increased Body temperature decreased  
Body temperature increased Bone disorder Bone pain  
Bradycardia Brain cancer metastatic Breast cancer  
Breast disorder Breast neoplasm Breast pain Breath odour  
Breath sounds abnormal Bronchitis Bronchospasm Burning  
sensation Bursitis Cachexia Cancer in remission Cancer pain  
Candidiasis Carbon dioxide increased Cardiac arrest  
Cardiac disorder Cardiac failure Cardiac failure congestive  
Cardiac fibrillation Cardiac flutter Cardiac murmur  
Cardiac output decreased Cardio-respiratory arrest  
Cardiomegaly Cardiomyopathy Cardiovascular disorder  
Carpal tunnel syndrome Cataract Cellulitis Cerebral  
infarction Cerebral ischaemia Cerebrovascular accident  
Cerumen impaction Change of bowel habit Cheilitis Chest  
discomfort Chest pain Chills Choking Cholangitis  
Cholecystitis Cholecystitis acute Cholelithiasis  
Cholestasis Chronic hepatitis Chronic obstructive pulmonary  
disease Clonic convulsion Coagulopathy Cognitive disorder  
Cold sweat Colitis Colitis ulcerative Coma Completed  
suicide Compression fracture Confusional state Conjunctivitis



Connective tissue disorder Constipation Convulsion  
 Coordination abnormal Cough Cough decreased Crying  
 Crystal urine Crystalluria Cyanosis Cystitis  
 Cystitis noninfective Cytolytic hepatitis Deafness  
 Deafness permanent Deafness transitory Death Decreased  
 appetite Decubitus ulcer Deep vein thrombosis Deficiency  
 anaemia Dehydration Delirium Delusion Dementia Dental  
 caries Dependence Depersonalisation Depressed level of  
 consciousness Depressed mood Depression Derealisation  
 Dermal cyst Dermatitis atopic Dermatitis bullous Dermatitis  
 contact Dermatitis exfoliative Dermoid cyst Diabetes mellitus  
 Diarrhoea Diplopia Discomfort Disorientation Disturbance  
 in attention Disturbance in sexual arousal Diverticulitis  
 Diverticulum Dizziness Drug abuse Drug dependence Drug  
 hypersensitivity Drug interaction Drug tolerance Drug withdrawal  
 syndrome Drug withdrawal syndrome neonatal Dry eye Dry mouth  
 Dry skin Dry throat Duodenitis Dysarthria Dyschezia  
 Dysgeusia Dyskinesia Dysmenorrhoea Dyspepsia Dysphagia  
 Dysphonia Dysphoria Dyspnoea Dyspnoea exertional  
 Dystonia Dysuria Ear congestion Ear discomfort Ear  
 disorder Ear infection Ear pain Early satiety Ecchymosis  
 Eczema Effusion Ejaculation delayed Ejaculation  
 disorder Electrocardiogram QT prolonged Electrocardiogram ST  
 segment depression Electrocardiogram abnormal Electrocardiogram  
 change Electrolyte imbalance Embolism Emotional disorder  
 Emotional distress Encephalopathy Endocarditis  
 Endocrine disorder Endometrial sarcoma Energy increased  
 Enterocolitis Eosinophil count increased Eosinophilia  
 Eosinophilic pneumonia Epistaxis Erectile dysfunction  
 Eructation Erysipelas Erythema Erythema multiforme  
 Euphoric mood Eustachian tube disorder Exostosis  
 Extrapyrmidal disorder Extrasystoles Eye disorder  
 Eye haemorrhage Eye pain Eye swelling Eyelid disorder  
 Eyelid ptosis Face oedema Faecal incontinence Faecalith  
 Faecaloma Faeces discoloured Fasciitis Fatigue Fear  
 Feeling abnormal Feeling cold Feeling drunk Feeling hot  
 Feeling jittery Feeling of body temperature change Flank pain  
 Flat affect Flatulence Fluid retention Flushing Foetor  
 hepaticus Frequent bowel movements Fungal infection Gait  
 disturbance Gamma-glutamyltransferase increased Gastric atony  
 Gastric disorder Gastritis Gastroenteritis Gastrointestinal  
 disorder Gastrointestinal haemorrhage Gastrointestinal infection  
 Gastrointestinal motility disorder Gastrointestinal pain  
 Gastrointestinal tract irritation Gastrooesophageal reflux  
 disease Generalised oedema Genital disorder female  
 Gingival bleeding Gingival pain Gingival ulceration  
 Gingivitis Glossitis Glossodynia Gout Grand mal convulsion  
 Granuloma Groin pain Gynaecomastia HIV infection  
 Haematemesis Haematochezia Haematocrit decreased  
 Haematocrit increased Haematoma Haematuria Haemoglobin  
 decreased Haemoglobin increased Haemolytic anaemia Haemoptysis  
 Haemorrhage Haemorrhoids Hair disorder Hallucination  
 Hangover Headache Hearing impaired Heat rash  
 Helicobacter infection Hemiplegia Hepatic enzyme increased  
 Hepatic failure Hepatic function abnormal Hepatic necrosis

Hepatic steatosisHepatitis Hepatitis C Hepatobiliary disease  
 Hepatocellular injury Hepatomegaly Hepatorenal syndrome  
 Hernia Herpes simplex Herpes virus infection Herpes  
 zoster Hiccups High density lipoprotein decreasedHordeolum  
 Hormone level abnormal Hostility Hot flush Hydronephrosis  
 Hyperacusis Hyperaesthesia Hypercalcaemia Hypercalciuria  
 Hypercapnia Hypercholesterolaemia Hyperglycaemia  
 Hyperhidrosis Hyperkalaemia Hyperkeratosis  
 Hyperkinesia Hyperlipidaemia Hyperpathia Hyperreflexia  
 Hypersensitivity Hypertension Hypertonia  
 Hypertriglyceridaemia Hyperuricaemia Hyperventilation  
 Hypoaesthesia Hypoalbuminaemia Hypocalcaemia  
 Hypoglycaemia Hypogonadism Hypokalaemia Hypokinesia  
 Hypomagnesaemia Hyponatraemia HypophosphataemiaHypopnoea  
 Hypoproteinaemia Hyporeflexia Hypotension Hypothermia  
 Hypothyroidism Hypotonia Hypoventilation Hypovolaemia  
 Hypovolaemic shock Hypoxia Idiopathic thrombocytopenic  
 purpura Ileus paralytic Ill-defined disorder Immune system  
 disorder Impaired gastric emptying Impaired healing  
 Inappropriate antidiuretic hormone secretion Incontinence  
 Increased appetite Increased bronchial secretion  
 Induration Infarction Infection Infestation Inflammation  
 Influenza Influenza like illness Infusion site reaction  
 Ingrowing nail Injection site haematoma Injection site  
 haemorrhage Injection site pain Injection site reaction  
 Injection site urticaria Insomnia Interstitial lung  
 disease Intestinal functional disorder Intestinal obstruction  
 Intestinal perforation Intra-uterine death Intracranial  
 aneurysm Intracranial pressure increased Iron deficiency Iron  
 deficiency anaemia Irritability Irritable bowel syndrome  
 Ischaemia Ischaemic stroke Jaundice Jaundice cholestatic  
 Joint crepitationJoint stiffness Joint swelling  
 Labyrinthitis Lacrimal disorderLacrimation increased Large  
 intestinal haemorrhage Large intestine perforation Laryngeal oedema  
 Laryngitis Laryngospasm Leiomyoma Lethargy  
 Leukocytosis Leukopenia Libido decreased Libido increased  
 Light anaesthesiaLip blisterLip pain Lip ulceration Liver  
 disorder Liver function test abnormal Liver injury Liver  
 tenderness Local reaction Localised infection Loss of  
 consciousness Low density lipoprotein increased Lung disorder  
 Lymphadenitis Lymphadenopathy Lymphocyte count decreased  
 Lymphocyte count increased Lymphoedema Lymphoma Lymphopenia  
 Malaise Mammogram abnormal Mediastinal disorder  
 Megacolon Melaena Memory impairmentMenometrorrhagia  
 Menopausal symptoms Menopause Menstrual disorder  
 Menstruation irregular Mental disabilityMental disorder  
 Mental retardation Mental status changes Metabolic  
 acidosis Metastases to central nervous system Metastasis  
 Micturition disorder Micturition urgency Migraine  
 Miosis Monocyte count increased Mood swings Mouth  
 ulceration Movement disorderMucosal inflammation Mucous membrane  
 disorder Muscle contractions involuntary Muscle relaxant  
 therapy Muscle rigidity Muscle spasms Muscle spasticity  
 Muscle twitching Muscular weaknessMusculoskeletal chest pain  
 Musculoskeletal discomfort Musculoskeletal disorder

Musculoskeletal pain Musculoskeletal stiffness Myalgia  
Mydriasis Myocardial infarction Myocardial ischaemia  
Myoclonus Myopathy Nasal congestion Nasal discomfort Nasal  
oedema Nasopharyngitis Nausea Neck pain Necrosis  
Neoplasm Neoplasm malignant Nephrolithiasis Nervous  
system disorder Nervousness Neuralgia Neuropathy peripheral  
Neutropenia Neutrophil count decreased Neutrophil count  
increased Night sweats Nightmare Nocturia Nodule  
Nuchal rigidity Nystagmus Obsessive-compulsive disorder  
Obstruction Obstructive airways disorder Oculogyric crisis  
Oedema peripheral Oesophageal disorder Oesophageal stenosis  
Oesophagitis Oliguria Opisthotonus Oral candidiasis  
Oral herpes Oral pain Oropharyngeal discomfort  
Oropharyngeal pain Orthostatic hypotension  
Osteoarthritis Osteopenia Osteoporosis Otitis externa  
Otitis media Oxygen saturation decreased Pain in extremity  
Pallor Palpitations Pancreatitis Pancreatitis  
acute Pancytopenia Panic attack Panic reaction Papule  
Paraesthesia Paralysis Paranoia Paresis Parosmia  
Pathological fracture Pelvic pain Pericarditis Peripheral  
coldness Peripheral ischaemia Peripheral vascular disorder  
Perirectal abscess Peroneal nerve palsy Persistent  
generalised lymphadenopathy Personality disorder Petechiae  
Pharyngitis Pharyngitis streptococcal Phlebitis Photophobia  
Photopsia Photosensitivity reaction Piloerection  
Plantar fasciitis Platelet count decreased Pleural disorder  
Pleural effusion Pneumonia Pneumothorax Poisoning  
Pollakiuria Polyp Polyuria Poor peripheral circulation Poor  
quality sleep Post procedural complication Post procedural  
haemorrhage Post procedural infection Premenstrual syndrome  
Presyncope Procedural pain Proctalgia Productive cough  
Prolonged labour Prostatic disorder Prostatitis  
Prostatomegaly Protein total decreased Protein urine  
present Proteinuria Prurigo Pruritus Pruritus generalised  
Pruritus genital Pseudolymphoma Psychomotor retardation  
Psychotic disorder Pulmonary congestion Pulmonary  
embolism Pulmonary function test decreased Pulmonary oedema  
Purpura Pyelonephritis Rales Rash Rash erythematous Rash  
maculo-papular Rash papular Rash pustular Rectal  
haemorrhage Rectal prolapse Red blood cell count decreased Red  
blood cell count increased Red blood cell sedimentation rate  
increased Reflux oesophagitis Regurgitation Renal failure  
Renal impairment Renal pain Respiration abnormal Respiratory  
acidosis Respiratory arrest Respiratory depression Respiratory  
disorder Respiratory distress Respiratory failure Respiratory  
rate decreased Respiratory tract congestion Respiratory tract  
infection viral Retching Retinal artery occlusion Rheumatoid  
arthritis Rhinalgia Rhinitis Rhinitis allergic Rhinitis seasonal  
Rhinorrhoea Rhonchi Rosacea Salivary hypersecretion  
Scleral haemorrhage Scrotal oedema Seasonal allergy  
Seborrhoeic dermatitis Sedation Sensory loss Sepsis  
Sexual dysfunction Shock Sinus congestion Sinus headache  
Sinus tachycardia Sinusitis Skin discolouration Skin  
disorder Skin hyperpigmentation Skin lesion Skin reaction Skin  
ulcer Sleep apnoea syndrome Sleep disorder Sluggishness Small

intestinal obstruction Sneezing Social avoidant behaviour  
 Somnolence Speech disorder Sputum increased Sticky skin  
 Stomatitis Strabismus Stridor Stupor Subdural  
 haematoma Suicidal ideation Suicide attempt Supraventricular  
 tachycardia Swelling Syncope Synovial cyst Synovitis  
 Tachycardia Tearfulness Tenderness Tendon disorder Tendonitis  
 Tension Thinking abnormal Thirst Thought blocking  
 Throat irritation Throat tightness Thrombocytopenia  
 Thrombocytopenic purpura Thrombocytosis Thrombophlebitis  
 Thrombosis Thyroid neoplasm Tinea pedis Tinnitus Tongue  
 disorder Tongue oedema Tooth abscess Tooth disorder Tooth  
 impacted Tooth infection Tooth loss Toothache Torsade de  
 pointes Toxic epidermal necrolysis Tracheitis Tremor  
 Tumour invasion Type I hypersensitivity Ulcer Upper  
 respiratory tract infection Upper-airway cough syndrome Urethral  
 disorder Urinary hesitation Urinary incontinence Urinary  
 retention Urinary tract disorder Urinary tract infection Urine  
 abnormality Urine analysis abnormal Urine output increased  
 Urogenital disorder Urticaria Uterine leiomyoma  
 Uterovaginal prolapse VIIth nerve paralysis Vaginal cyst  
 Vaginal discharge Vaginal haemorrhage Vaginal infection  
 Vaginal inflammation Vascular insufficiency Vascular purpura  
 Vasodilation procedure Venous thrombosis Ventricular  
 extrasystoles Ventricular fibrillation Ventricular  
 tachycardia Vertigo Viral diarrhoea Viral infection Vision  
 blurred Visual acuity reduced Visual impairment Vomiting  
 Weight decreased Weight increased Wheezing White blood cell  
 count increased Withdrawal syndrome Wound haemorrhage Wound  
 infection Yawning

\*\*\*\*\*  
 \*\*\*\*\*

Receptor-type tyrosine-protein phosphatase S - Group: Enzyme  
 Treated with:

alendronate: approved small molecule (52 associated side  
 effects) For the treatment and prevention of osteoporosis in women  
 and Paget's disease of bone in both men and women.  
 etidronic acid: approved small molecule (49 associated side  
 effects) For the treatment of symptomatic Paget's disease of bone  
 and in the prevention and treatment of heterotopic ossification  
 following total hip replacement or due to spinal cord injury.

84 known side effects mediated through drugs targeting this protein:

Agranulocytosis Alopecia Amnesia Anaemia Anastomotic ulcer  
 Angioedema Arthralgia Arthritis Arthropathy Asthenia  
 Asthma Body temperature increased Bone pain Calcinosis  
 Confusional state Dermatitis Diarrhoea Discomfort Duodenal  
 ulcer Electrolyte imbalance Endometrial sarcoma Episcleritis  
 Erosive oesophagitis Erythema Erythema multiforme  
 Feeling abnormal Gastric ulcer Gastritis Gastrointestinal  
 disorder Gastrooesophageal reflux disease Glossitis Glossodynia  
 Haemoglobin Haemorrhage Hallucination Headache  
 Hypersensitivity Hypocalcaemia Ill-defined disorder  
 Impaired healing Infection Influenza Joint swelling  
 Leukaemia Leukopenia Lymphopenia Malaise Melaena  
 Muscle spasms Musculoskeletal discomfort Musculoskeletal

pain Myalgia Nausea Neoplasm malignant Nephrotic  
 syndrome Oedema Oedema peripheral Oesophageal stenosis  
 Oesophagitis Oral disorder Osteoarthritis  
 Osteogenesis imperfecta Osteolysis Osteomalacia  
 Osteomyelitis Osteonecrosis of jaw Pancytopenia  
 Paraesthesia Peptic ulcer Photosensitivity reaction  
 Pruritus Rash Rash macular Rash maculo-papular  
 Scleritis Stevens-Johnson syndrome Swelling Toxic  
 epidermal necrolysis Transaminases increased Ulcer Urticaria  
 Uveitis Vertigo Vomiting

\*\*\*\*\*  
 \*\*\*\*\*

Low-affinity cationic amino acid transporter 2 - Group: Transporter  
 Treated with:

l-lysine: approved, nutraceutical small molecule (0 associated  
 side effects) Supplemental L-lysine has putative anti-herpes  
 simplex virus activity. There is preliminary research suggesting  
 that it may have some anti-osteoporotic activity.

l-ornithine: approved, nutraceutical small molecule (0  
 associated side effects) Used for nutritional supplementation,  
 also for treating dietary shortage or imbalance. It has been claimed  
 that ornithine improves athletic performance, has anabolic effects,  
 has wound-healing effects, and is immuno-enhancing.

known side effects mediated through drugs targeting this protein:

\*\*\*\*\*  
 \*\*\*\*\*

Alpha-7 nicotinic cholinergic receptor subunit - Group: Channel  
 Treated with:

tramadol: approved small molecule (490 associated side  
 effects) Indicated in the treatment of moderate to severe pain.  
 Consider for those prone to constipation or respiratory depression.  
 Tramadol is used to treat postoperative, dental, cancer, and acute  
 musculoskeletal pain and as an adjuvant to NSAID therapy in patients  
 with osteoarthritis.

succinylcholine: approved small molecule (27 associated side  
 effects) Used in surgical procedures where a rapid onset and brief  
 duration of muscle relaxation is needed (includes intubation,  
 endoscopies, and ECT)

memantine: approved small molecule (250 associated side  
 effects) For the treatment of moderate to severe dementia of the  
 Alzheimer's type.

tenocyclidine: illicit, experimental small molecule (0  
 associated side effects) Because of its high affinity for the  
 phencyclidine binding site on the NMDA receptor, the 3H  
 radiolabelled form of tenocyclidine is widely used in research into  
 NMDA receptors.

575 known side effects mediated through drugs targeting this  
 protein:

Abdominal discomfort Abdominal distension Abdominal pain lower  
 Abdominal pain upper Abdominal tenderness Abnormal  
 behaviour Abnormal dreams Abnormal faeces Abscess Acne Acute  
 coronary syndrome Acute myocardial infarction Affect lability

Aggression Agitation Agranulocytosis Alanine  
 aminotransferase decreased Alanine aminotransferase increased  
 Albuminuria Alopecia Altered state of consciousness  
 Amblyopia Amnesia Anaemia Anaphylactic shock  
 Anaphylactoid reaction Aneurysm Angina pectoris Angina  
 unstable Angioedema Angiopathy Anorectal disorder Anosmia  
 Anxiety Aortic aneurysm Aortic dissection Apathy  
 Aphasia Apnoea Appendicitis Arrhythmia Arthralgia  
 Arthritis Arthropathy Aspartate aminotransferase increased  
 Aspiration Asthenia Asthma Ataxia Atrial  
 fibrillation Atrial flutter Atrioventricular block Back  
 disorder Back pain Benign breast neoplasm Biliary tract disorder  
 Bipolar I disorder Bipolar disorder Bladder pain  
 Blepharitis Blindness Blister Blood alkaline phosphatase  
 increased Blood amylase increased Blood bilirubin increased  
 Blood cholesterol increased Blood creatine phosphokinase  
 increased Blood creatinine increased Blood glucose abnormal Blood  
 glucose increased Blood lactate dehydrogenase increased Blood  
 potassium abnormal Blood potassium decreased Blood potassium  
 increased Blood pressure increased Blood sodium increased Blood  
 triglycerides increased Blood urea increased Blood uric acid  
 increased Body temperature decreased Body temperature increased  
 Bone disorder Bone pain Bradycardia Breast cancer  
 Breast disorder Breast neoplasm Breath odour Bronchitis  
 Bronchospasm Burning sensation Bursitis Cardiac arrest  
 Cardiac disorder Cardiac failure Cardiac fibrillation  
 Cardiac flutter Cardiac murmur Cardiovascular disorder  
 Carpal tunnel syndrome Cataract Cellulitis Cerebral  
 haemorrhage Cerebral infarction Cerebrovascular accident  
 Cerumen impaction Change of bowel habit Chest discomfort Chest  
 pain Chills Cholecystitis Cholelithiasis Cognitive  
 disorder Cold sweat Colitis Coma Completed suicide Confusional  
 state Conjunctival haemorrhage Conjunctivitis Connective tissue  
 disorder Constipation Convulsion Coordination abnormal  
 Corneal opacity Cough Crocodile tears syndrome Crying  
 Crystal urine Crystalluria Cystitis Cystitis  
 noninfective Deafness Death Decreased appetite Deep vein  
 thrombosis Dehydration Delirium Delusion Dependence  
 Depersonalisation Depressed level of consciousness Dermal cyst  
 Dermatitis atopic Dermatitis bullous Dermatitis contact  
 Dermoid cyst Diabetes mellitus Diarrhoea Diplopia  
 Discomfort Disorientation Dissociation Disturbance in  
 attention Disturbance in sexual arousal Diverticulitis  
 Diverticulum Dizziness Drug abuse Drug dependence Drug  
 withdrawal syndrome Dry eye Dry mouth Dry skin Dry throat  
 Dysarthria Dysgeusia Dyskinesia Dysmenorrhoea Dyspepsia  
 Dysphagia Dyspnoea Dysuria Ear congestion Ear  
 discomfort Ear infection Ear pain Ecchymosis Eczema  
 Effusion Ejaculation disorder Electrocardiogram QT  
 prolonged Electrocardiogram abnormal Electrocardiogram change  
 Embolism Emotional disorder Encephalopathy Endocrine  
 disorder Eosinophil count increased Epistaxis Erectile  
 dysfunction Eructation Erysipelas Erythema Erythema multiforme  
 Euphoric mood Eustachian tube disorder Exostosis  
 Extrapiramidal disorder Eye disorder Eye pain

Eyelid disorder Eyelid ptosis Faecal incontinence  
 Faecalith Faecaloma Faeces discoloured Fasciitis  
 Fatigue Feeling abnormal Feeling cold Feeling hot  
 Feeling jittery Flat affect Flatulence Flushing Fungal  
 infection Gait disturbance Gamma-glutamyltransferase increased  
 Gastritis Gastroenteritis Gastrointestinal disorder  
 Gastrointestinal haemorrhage Gastrointestinal infection  
 Gastrointestinal pain Gastrointestinal tract irritation  
 Gastrooesophageal reflux disease Glaucoma Gout Grand mal  
 convulsion Groin pain Gynaecomastia Haematemesis  
 Haematochezia Haematocrit decreased Haematocrit increased  
 Haematoma Haematuria Haemoglobin decreased Haemoglobin  
 increased Haemolytic anaemia Haemoptysis Haemorrhage Haemorrhage  
 intracranial Hair disorder Hallucination Headache  
 Hearing impaired Helicobacter infection Hemiplegia Hepatic  
 enzyme increased Hepatic failure Hepatic function abnormal  
 Hepatitis Hepatitis cholestatic Hepatobiliary disease  
 Hernia Herpes simplex Herpes virus infection Herpes  
 zoster Hiccups High density lipoprotein decreased Hordeolum  
 Hormone level abnormal Hot flush Hyperaesthesia  
 Hypercalcaemia Hypercalciuria Hypercholesterolaemia  
 Hyperglycaemia Hyperhidrosis Hyperkalaemia  
 Hyperkeratosis Hyperkinesia Hyperlipidaemia  
 Hyperreflexia Hypersensitivity Hypertension  
 Hyperthermia Hyperthermia malignant Hypertonia  
 Hypertriglyceridaemia Hyperuricaemia Hyperventilation  
 Hypoaesthesia Hypocalcaemia Hypoglycaemia  
 Hypokalaemia Hypokinesia Hyponatraemia Hypophosphataemia  
 Hypotension Hypothermia Hypothyroidism Ileus Ill-defined  
 disorder Immune system disorder Inappropriate antidiuretic hormone  
 secretion Incontinence Increased appetite Infarction  
 Infection Infestation Inflammation Influenza Influenza  
 like illness Ingrowing nail Insomnia Intermittent  
 claudication International normalised ratio increased  
 Interstitial lung disease Intestinal functional disorder  
 Intestinal obstruction Intraocular pressure increased  
 Irritability Irritable bowel syndrome Ischaemia Joint  
 crepitation Joint stiffness Joint swelling Labyrinthitis  
 Lacrimal disorder Lacrimation increased Laryngitis Leiomyoma  
 Lethargy Leukopenia Libido decreased Libido increased Lip  
 blister Liver function test abnormal Localised infection Loss  
 of consciousness Low density lipoprotein increased Lymphadenopathy  
 Lymphocyte count decreased Lymphocyte count increased  
 Macular degeneration Macule Malaise Mammogram  
 abnormal Mediastinal disorder Melaena Menometrorrhagia  
 Menopausal symptoms Menopause Menstrual disorder  
 Mental disability Mental disorder Mental disorder due to a  
 general medical condition Mental retardation Micturition  
 disorder Micturition urgency Migraine Miosis Monocyte  
 count increased Mood swings Muscle contractions involuntary  
 Muscle rigidity Muscle spasms Muscle spasticity Muscle  
 twitching Muscular weakness Musculoskeletal chest pain  
 Musculoskeletal discomfort Musculoskeletal disorder  
 Musculoskeletal stiffness Myalgia Myocardial infarction  
 Myocardial ischaemia Myoclonus Myopathy Myopia Nasal

congestion Nasal oedema Nasopharyngitis Nausea Neck pain  
 Necrosis Neoplasm Neoplasm malignant Nephrolithiasis  
 Nervous system disorder Nervousness Neuralgia Neuroleptic  
 malignant syndrome Neuropathy peripheral Neurosis Neutropenia  
 Neutrophil count decreased Neutrophil count increased Night  
 sweats Nightmare Nocturia Nuchal rigidity Obstruction  
 Oedema peripheral Oesophageal disorder Oesophageal ulcer  
 Oliguria Oral pain Oropharyngeal discomfort  
 Oropharyngeal pain Orthostatic hypotension  
 Osteoarthritis Osteopenia Osteoporosis Otitis externa  
 Otitis media Pain in extremity Pallor Palpitations  
 Pancreatitis Pancreatitis acute Pancytopenia  
 Paraesthesia Paranoia Pathological fracture Pelvic pain  
 Peripheral ischaemia Peripheral vascular disorder Personality  
 disorder Pharyngitis Phlebitis Photopsia Photosensitivity  
 reaction Piloerection Plantar fasciitis Platelet count  
 decreased Pneumonia Pneumonia aspiration Pollakiuria Polyp  
 Polyuria Poor peripheral circulation Productive cough  
 Prostatic disorder Prostatitis Prostatomegaly Protein  
 total decreased Protein urine present Proteinuria Prurigo  
 Pruritus Pruritus generalised Pruritus genital Psychotic  
 disorder Pulmonary embolism Pulmonary function test decreased  
 Pulmonary oedema Purpura Rales Rash Rash erythematous  
 Rectal haemorrhage Rectal prolapse Red blood cell count  
 decreased Red blood cell count increased Red blood cell  
 sedimentation rate increased Renal failure acute Renal function  
 test abnormal Renal impairment Renal pain Respiratory depression  
 Respiratory disorder Respiratory tract infection viral  
 Retching Retinal detachment Retinal haemorrhage  
 Rhabdomyolysis Rheumatoid arthritis Rhinitis Rhinitis  
 allergic Rhinitis seasonal Rhinorrhoea Rhonchi Rosacea  
 Salivary hypersecretion Scleral haemorrhage Seasonal  
 allergy Sedation Sepsis Sexual dysfunction Shock Sinus  
 congestion Sinus headache Sinus tachycardia Sinusitis Skin  
 disorder Skin ulcer Sleep apnoea syndrome Sleep disorder Small  
 intestinal obstruction Sneezing Somnolence Speech disorder  
 Stevens-Johnson syndrome Sticky skin Stomatitis Stupor  
 Sudden death Suicidal ideation Suicide attempt  
 Supraventricular tachycardia Swelling Syncope Synovial  
 cyst Tachycardia Tardive dyskinesia Tenderness Tendon disorder  
 Tendonitis Tension Thinking abnormal Thirst Thought  
 blocking Throat irritation Thrombocytopenia Thrombocytopenic  
 purpura Thrombocytosis Thrombophlebitis Thrombosis Thrombotic  
 thrombocytopenic purpura Thyroid neoplasm Tinea pedis Tinnitus  
 Tongue disorder Tongue oedema Tooth abscess Tooth  
 disorder Tooth impacted Tooth infection Toothache Torsade de  
 pointes Toxic epidermal necrolysis Tracheitis Transient  
 ischaemic attack Tremor Ulcer Upper respiratory tract infection  
 Urethral disorder Urinary hesitation Urinary incontinence  
 Urinary retention Urinary tract disorder Urinary tract  
 infection Urine abnormality Urine analysis abnormal Urine  
 output increased Urogenital disorder Urticaria Uterine leiomyoma  
 Uterovaginal prolapse Vaginal cyst Vaginal discharge  
 Vaginal haemorrhage Vascular dementia Vascular insufficiency  
 Vascular purpura Vasodilation procedure Venous thrombosis



Vertigo      Viral diarrhoea      Viral infection      Vision blurred  
Visual acuity reduced      Visual impairment      Vomiting      Weight  
decreased      White blood cell count increased      Withdrawal syndrome  
Wound haemorrhage      Wound infection      Xerophthalmia      Yawning

\*\*\*\*\*  
\*\*\*\*\*

Monocarboxylate transporter 7 - Group: Transporter

Treated with:

pyruvic acid:      approved, nutraceutical small molecule      (0  
associated side effects)      For nutritional supplementation, also  
for treating dietary shortage or imbalance

known side effects mediated through drugs targeting this protein:

\*\*\*\*\*  
\*\*\*\*\*

Receptor-type tyrosine-protein phosphatase epsilon - Group: Enzyme

Treated with:

alendronate:      approved      small molecule      (52 associated side  
effects)      For the treatment and prevention of osteoporosis in women  
and Paget's disease of bone in both men and women.

52 known side effects mediated through drugs targeting this protein:

Alopecia      Anaemia      Anastomotic ulcer      Angioedema      Asthenia      Body  
temperature increased      Calcinosis      Discomfort      Duodenal ulcer  
Endometrial sarcoma      Episcleritis      Erosive oesophagitis  
Feeling abnormal      Gastric ulcer      Gastrointestinal disorder  
Gastrooesophageal reflux disease      Haemoglobin      Haemorrhage  
Hypersensitivity      Hypocalcaemia      Ill-defined disorder  
Impaired healing      Infection      Influenza      Joint swelling  
Leukaemia      Lymphopenia      Malaise      Melaena      Musculoskeletal  
discomfort      Musculoskeletal pain      Myalgia      Neoplasm malignant  
Oedema      Oedema peripheral      Oesophageal stenosis  
Oesophagitis      Oral disorder      Osteogenesis imperfecta  
Osteomalacia      Osteomyelitis      Osteonecrosis of jaw  
Peptic ulcer      Photosensitivity reaction      Pruritus  
Scleritis      Swelling      Toxic epidermal necrolysis  
Transaminases increased      Urticaria      Uveitis      Vertigo

\*\*\*\*\*  
\*\*\*\*\*

Gonadotropin-releasing hormone II receptor - Group: Receptor

Treated with:

gonadorelin:      approved      small molecule      (0 associated side  
effects)      For evaluating the functional capacity and response of  
the gonadotropes of the anterior pituitary also for evaluating  
residual gonadotropic function of the pituitary following removal of  
a pituitary tumor by surgery and/or irradiation.

nafarelin:      approved      small molecule      (0 associated side effects)  
For treatment of central precocious puberty (true precocious  
puberty, GnRH-dependent precocious precocity, complete isosexual  
precocity) in children of both sexes and for the treatment of  
endometriosis.

danazol:      approved      small molecule      (89 associated side effects)

For the treatment of endometriosis and fibrocystic breast  
disease (in patients unresponsive to simple measures). Also used for

the prophylactic treatment of all types of hereditary angioedema in males and females.

89 known side effects mediated through drugs targeting this protein:

Acne Acute coronary syndrome Adenoma benign Affect lability  
Alopecia Amenorrhoea Anxiety Arthralgia Asthenia Back  
pain Benign intracranial hypertension Blood insulin increased  
Body temperature increased Breast discharge Carpal tunnel  
syndrome Cataract Chills Constipation Convulsion  
Dermatitis Dizziness Dysphonia Eosinophilia Erythema  
multiforme Fatigue Fluid retention Flushing Gastroenteritis  
Gingival bleeding Haematuria Haemoglobin Haemorrhage Headache  
Hepatic adenoma Hepatic function abnormal Hepatic neoplasm  
Hirsutism Hyperhidrosis Hyperinsulinism Hypertension  
Hypertrophy Infarction Interstitial lung disease  
Intracranial pressure increased Jaundice Jaundice  
cholestatic Joint swelling Laboratory test abnormal  
Leukocytosis Leukopenia Loss of consciousness  
Metrorrhagia Mood swings Muscle spasms Musculoskeletal  
discomfort Myocardial infarction Nasal congestion Nausea  
Neoplasm Nervousness Oedema Oropharyngeal discomfort  
Oropharyngeal pain Palpitations Pancreatitis  
Paraesthesia Peliosis hepatis Pelvic pain Photosensitivity  
reaction Pneumonia Polycythaemia Pruritus Purpura Rash  
Seborrhoeic dermatitis Shock Sleep disorder Swelling  
Syncope Tachycardia Tension Thrombocytopenia Tremor  
Urticaria Vascular purpura Visual impairment Vomiting  
Vulvovaginal dryness Weight increased

\*\*\*\*\*  
\*\*\*\*\*

Low-density lipoprotein receptor - Group: Receptor

Treated with:

porfimer: approved small molecule (0 associated side effects)

Indicated in the treatment of esophageal cancer.

alpha-d-mannose: experimental small molecule (0 associated side effects)

known side effects mediated through drugs targeting this protein:

\*\*\*\*\*  
\*\*\*\*\*

D(2) dopamine receptor - Group: Receptor

Treated with:

ziprasidone: approved small molecule (251 associated side effects) For the treatment of schizophrenia and related psychotic disorders.

cabergoline: approved small molecule (96 associated side effects) For the treatment of hyperprolactinemic disorders, either idiopathic or due to prolactinoma (prolactin-secreting adenomas).

May also be used to manage symptoms of Parkinsonian Syndrome as monotherapy during initial symptomatic management or as an adjunct to levodopa therapy during advanced stages of disease.

ropinirole: approved small molecule (631 associated side effects) For the treatment of the signs and symptoms of idiopathic

Parkinson's disease. Also used for the treatment of restless legs syndrome.

olanzapine: approved small molecule (393 associated side effects) For the acute and maintenance treatment of schizophrenia and related psychotic disorders, as well as acute treatment of manic or mixed episodes of bipolar 1 disorder. Intramuscular olanzapine is indicated for the rapid control of agitated patients.

clozapine: approved small molecule (228 associated side effects) For use in patients with treatment-resistant schizophrenia.

thiethylperazine: approved small molecule (0 associated side effects) For the treatment or relief of nausea and vomiting.

sulpiride: approved small molecule (0 associated side effects) Sulpiride is indicated for the treatment of schizophrenia.

loxapine: approved small molecule (74 associated side effects) For the management of the manifestations of psychotic disorders such as schizophrenia

remoxipride: approved, withdrawn small molecule (0 associated side effects) Remoxipride is an atypical antipsychotic once used for the treatment of schizophrenia.

pramipexole: approved small molecule (620 associated side effects) For the treatment of signs and symptoms of idiopathic Parkinson's disease

promazine: approved small molecule (0 associated side effects) Used as an adjunct for short term treatment of moderate and severe psychomotor agitation. Also used to treat agitation or restlessness in the elderly.

prochlorperazine: approved small molecule (113 associated side effects) For the symptomatic management of psychotic disorders, short term management of nonpsychotic anxiety in patients with generalized anxiety disorder, and for the control of severe nausea and vomiting of various causes.

droperidol: approved small molecule (29 associated side effects) Droperidol is used to produce tranquilization and to reduce the incidence of nausea and vomiting in surgical and diagnostic procedures.

chlorpromazine: approved small molecule (111 associated side effects) For the treatment of schizophrenia, control nausea and vomiting, For relief of restlessness and apprehension before surgery, adjunct in the treatment of tetanus, control the manifestations of the manic type of manic-depressive illness.

bupirone: approved small molecule (147 associated side effects) For the management of anxiety disorders or the short-term relief of the symptoms of anxiety, and also as an augmentation of SSRI-treatment against depression.

haloperidol: approved small molecule (79 associated side effects) For the management of psychotic disorders (eg. schizophrenia) and delirium, as well as to control tics and vocal utterances of Tourette's syndrome (Gilles de la Tourette's syndrome). Also used for the treatment of severe behavioural problems in children with disruptive behaviour disorder or ADHD (attention-deficit hyperactivity disorder). Haloperidol has been used in the prevention and control of severe nausea and vomiting.

trifluoperazine: approved small molecule (0 associated side effects) Used mainly in the management of psychoses. Also used to control nausea and vomiting.

amoxapine: approved small molecule (103 associated side effects) For the relief of symptoms of depression in patients with neurotic or reactive depressive disorders as well as endogenous and psychotic depressions. May also be used to treat depression accompanied by anxiety or agitation.

cinnarizine: approved small molecule (0 associated side effects) For the treatment of vertigo/meniere's disease, nausea and vomiting, motion sickness and also useful for vestibular symptoms of other origins.

lisuride: approved small molecule (0 associated side effects)  
For the management of Parkinson's Disease

fluphenazine: approved small molecule (122 associated side effects) For management of manifestations of psychotic disorders.

thioridazine: approved small molecule (92 associated side effects) For the treatment of schizophrenia and generalized anxiety disorder.

ergotamine: approved small molecule (15 associated side effects)  
For use as therapy to abort or prevent vascular headache, e.g., migraine, migraine variants, or so called "histaminic cephalalgia".

apomorphine: approved small molecule (45 associated side effects) For the acute, intermittent treatment of hypomobility, off episodes (end-of-dose wearing off and unpredictable on/off episodes) associated with advanced Parkinson's disease.

trimipramine: approved small molecule (0 associated side effects) For the treatment of depression and depression accompanied by anxiety, agitation or sleep disturbance

risperidone: approved small molecule (532 associated side effects) For the treatment of schizophrenia in adults and in adolescents, ages 13 to 17, and for the short-term treatment of manic or mixed episodes of bipolar I disorder in children and adolescents ages 10 to 17. May also be used to manage symptoms of inappropriate behavior due to aggression and/or psychosis in patients with severe dementia.

propiomazine: approved small molecule (0 associated side effects) Propiomazine is largely used for its antihistaminic sleep inducing effects in treating insomnia.

minaprine: approved small molecule (0 associated side effects)  
For the treatment of depression

trifluoperazine: approved small molecule (111 associated side effects) For the treatment of anxiety disorders, depressive symptoms secondary to anxiety and agitation.

perphenazine: approved small molecule (131 associated side effects) For use in the management of the manifestations of psychotic disorders and for the control of severe nausea and vomiting in adults.

flupenthixol: approved small molecule (0 associated side effects) For use in the treatment of schizophrenia and depression

amantadine: approved small molecule (90 associated side effects)  
For the chemoprophylaxis, prophylaxis, and treatment of signs and symptoms of infection caused by various strains of influenza A

virus. Also for the treatment of parkinsonism and drug-induced extrapyramidal reactions.

mesoridazine: approved small molecule (83 associated side effects) Used in the treatment of schizophrenia, organic brain disorders, alcoholism and psychoneuroses.

dopamine: approved small molecule (23 associated side effects)  
For the correction of hemodynamic imbalances present in the shock syndrome due to myocardial infarction, trauma, endotoxic septicemia, open-heart surgery, renal failure, and chronic cardiac decompensation as in congestive failure

carphenazine: approved small molecule (0 associated side effects) Used in the treatment of acute or chronic schizophrenic reactions in hospitalized patients.

acetophenazine: approved small molecule (0 associated side effects) For the treatment of disorganized and psychotic thinking. Also used to help treat false perceptions (e.g. hallucinations or delusions.)

promethazine: approved small molecule (80 associated side effects) For the treatment of allergic disorders, and nausea/vomiting.

pimozide: approved small molecule (68 associated side effects)  
Used for the suppression of motor and phonic tics in patients with Tourette's Disorder who have failed to respond satisfactorily to standard treatment.

doxepin: approved small molecule (210 associated side effects) Labeled indications: depression and insomnia. Unlabeled indications: chronic and neuropathic pain, anxiety, idiopathic urticaria.

domperidone: approved small molecule (40 associated side effects) For management of dyspepsia, heartburn, epigastric pain, nausea, and vomiting.

pergolide: approved, withdrawn small molecule (354 associated side effects) Indicated as adjunctive treatment to levodopa/carbidopa in the management of the signs and symptoms of Parkinson's disease. It was withdrawn from the US and Canadian markets in 2007 due to an increased risk of cardiac valvulopathy.

bromocriptine: approved small molecule (120 associated side effects) For the treatment of galactorrhea due to hyperprolactinemia, prolactin-dependent menstrual disorders and infertility, prolactin-secreting adenomas, prolactin-dependent male hypogonadism, as adjunct therapy to surgery or radiotherapy for acromegaly or as monotherapy in special cases, as monotherapy in early Parkinsonian Syndrome or as an adjunct with levodopa in advanced cases with motor complications. Bromocriptine has also been used off-label to treat restless legs syndrome and neuroleptic malignant syndrome.

ketamine: approved small molecule (35 associated side effects)  
For use as the sole anesthetic agent for diagnostic and surgical procedures that do not require skeletal muscle relaxation.

quetiapine: approved small molecule (359 associated side effects) For the treatment of schizophrenia and related psychotic disorders.

metoclopramide: approved small molecule (75 associated side effects) For the treatment of gastroesophageal reflux disease

(GERD). It is also used in treating nausea and vomiting, and to increase gastric emptying.

aripiprazole: approved small molecule (630 associated side effects) For the treatment of schizophrenia and related psychotic disorders.

chlorprothixene: approved small molecule (0 associated side effects) For treatment of psychotic disorders (e.g. schizophrenia) and of acute mania occurring as part of bipolar disorders.

paliperidone: approved small molecule (216 associated side effects) For the treatment of schizophrenia.

yohimbine: approved small molecule (0 associated side effects)  
Indicated as a sympatholytic and mydriatic. Impotence has been successfully treated with yohimbine in male patients with vascular or diabetic origins and psychogenic origins.

methotrimeprazine: approved small molecule (0 associated side effects) For the treatment of psychosis, particular those of schizophrenia, and manic phases of bipolar disorder.

alizapride: approved small molecule (0 associated side effects)  
Alizapride is used in the treatment of nausea and vomiting, including postoperative nausea and vomiting.

rolicyclidine: illicit, experimental small molecule (0 associated side effects) Rolicyclidine has anesthetic properties and can induce a sedative effect.

acepromazine: approved small molecule (0 associated side effects) Acepromazine was first used in humans in the 1950s as an antipsychotic agent. It is now rarely used in humans. Acepromazine is frequently used in animals as a sedative and antiemetic. Its principal value is in quietening and calming anxious animals.

molindone: approved small molecule (46 associated side effects)  
Molindone is used for the management of the manifestations of psychotic disorders.

pipotiazine: approved small molecule (94 associated side effects) For the maintenance treatment of chronic non-agitated schizophrenic patients.

thiopropazine: approved small molecule (0 associated side effects) For the treatment of all types of acute and chronic schizophrenia, including those which did not respond to the usual neuroleptics; manic syndromes.

thiothixene: approved small molecule (79 associated side effects) For the management of schizophrenia.

zuclopenthixol: approved small molecule (0 associated side effects) For the management of the manifestations of schizophrenia.

aniracetam: experimental small molecule (0 associated side effects)

fluspirilene: approved small molecule (0 associated side effects) Used for the treatment of schizophrenia.

rotigotine: approved small molecule (93 associated side effects)  
For use/treatment in neurologic disorders and parkinson's disease as well as moderate-to-severe primary Restless Legs Syndrome.

sertindole: approved, withdrawn small molecule (0 associated side effects) Used in the treatment of schizophrenia.

amisulpride: approved small molecule (0 associated side effects) Investigated for use/treatment in schizophrenia and

schizoaffective disorders, mania in bipolar disorder, and depression.

1317 known side effects mediated through drugs targeting this protein:

Abasia Abdominal adhesions Abdominal discomfort Abdominal distension Abdominal neoplasm Abdominal pain Abdominal pain lower Abdominal pain upper Abdominal tenderness Abnormal behaviour Abnormal dreams Abnormal faeces Abscess Accommodation disorder Acidosis Acne Actinic keratosis Acute abdomen Acute coronary syndrome Acute lymphocytic leukaemia Acute psychosis Acute respiratory failure Acute tonsillitis Adenocarcinoma Adenoma benign Adhesion Adjustment disorder Affect lability Affective disorder Ageusia Aggression Agitation Agoraphobia Agranulocytosis Akathisia Akinesia Alanine aminotransferase increased Albright's disease Albuminuria Alcohol abuse Alcohol intolerance Alkalosis Alopecia Altered state of consciousness Amaurosis fugax Amblyopia Amenorrhoea Amnesia Anaemia Anaemia macrocytic Anaemia megaloblastic Anaphylactic shock Anaphylactoid reaction Aneurysm Anger Angina pectoris Angina unstable Angioedema Angiomyolipoma Angiopathy Angle closure glaucoma Anorectal discomfort Anorectal disorder Anorgasmia Antidiuretic hormone abnormality Antisocial behaviour Antisocial personality disorder Anxiety Aortic dissection Apathy Aphasia Aphonia Aphthous stomatitis Aplastic anaemia Apnoea Appendicitis Application site reaction Apraxia Argininosuccinate synthetase deficiency Arrhythmia Arrhythmia supraventricular Arterial disorder Arterial occlusive disease Arterial stenosis Arteriosclerosis Arteritis Arthralgia Arthritis Arthropathy Ascites Asocial behaviour Aspartate aminotransferase increased Asphyxia Aspiration Asthenia Asthma Ataxia Atelectasis Athetosis Atrial fibrillation Atrial flutter Atrial septal defect Atrioventricular block first degree Atrioventricular block second degree Atrophy Aura Automatism Autonomic nervous system imbalance Azotaemia Back pain Bacterial infection Balance disorder Balanoposthitis Basal cell carcinoma Basophilia Benign intracranial hypertension Benign neoplasm Benign neoplasm of skin Benign prostatic hyperplasia Biliary colic Binge eating Bladder cancer Bladder disorder Bladder pain Blepharitis Blepharospasm Blindness Blindness transient Blister Blood alkaline phosphatase increased Blood amylase increased Blood antidiuretic hormone abnormal Blood bilirubin increased Blood cholesterol increased Blood creatine phosphokinase increased Blood creatinine increased Blood disorder Blood electrolytes abnormal Blood glucose decreased Blood glucose increased Blood insulin increased Blood iron decreased Blood lactate dehydrogenase increased Blood phosphorus increased Blood potassium decreased Blood potassium increased Blood pressure abnormal Blood pressure diastolic decreased Blood pressure fluctuation Blood pressure increased Blood pressure systolic decreased Blood prolactin increased Blood testosterone decreased Blood triglycerides increased Blood triglycerides normal Blood urea

increased Blood uric acid increased Blood urine Blood urine  
 present Blunted affect Body temperature decreased Body  
 temperature increased Bone disorder Bone pain Bone sarcoma  
 Bradycardia Bradykinesia Bradyphrenia Brain neoplasm  
 Brain neoplasm benign Brain oedema Breast cancer  
 Breast cyst Breast discharge Breast discomfort Breast disorder  
 Breast disorder female Breast disorder male Breast  
 engorgement Breast enlargement Breast feeding Breast neoplasm  
 Breast pain Breast swelling Breast tenderness Breath odour  
 Bronchiolitis Bronchitis Bronchopneumonia  
 Bronchopneumopathy Bronchospasm Bruxism  
 Buccoglossal syndrome Bulimia nervosa Bundle branch block  
 Bundle branch block left Bundle branch block right  
 Burning sensation Bursitis Cachexia Calculus bladder  
 Calculus urinary Cancer in remission Candidiasis  
 Carbohydrate tolerance decreased Cardiac arrest Cardiac  
 disorder Cardiac failure Cardiac failure congestive Cardiac  
 fibrillation Cardiac flutter Cardiac murmur Cardiac septal  
 defect Cardiac valve disease Cardio-respiratory arrest  
 Cardiomegaly Cardiomyopathy Cardiopulmonary failure  
 Cardiovascular disorder Carotid artery occlusion  
 Carpal tunnel syndrome Cataplexy Cataract Catatonia Cells  
 in urine Cellulitis Cerebral artery embolism Cerebral atrophy  
 Cerebral haemorrhage Cerebral infarction Cerebral  
 ischaemia Cerebrospinal fluid rhinorrhoea Cerebrovascular  
 accident Cerebrovascular disorder Cervicitis Cervix carcinoma  
 Chapped lips Cheilitis Chest discomfort Chest pain  
 Chills Choking Cholecystitis Cholecystitis chronic  
 Cholelithiasis Cholestasis Chorea Choreoathetosis  
 Chromaturia Chronic lymphocytic leukaemia Chronic  
 obstructive pulmonary disease Claustrophobia Clonus  
 Coagulopathy Coccydynia Cognitive disorder Cogwheel  
 rigidity Cold sweat Colitis Colitis ulcerative Colon  
 cancer Colorectal cancer Coma Completed suicide Compulsions  
 Condition aggravated Conduction disorder Confusional state  
 Congenital anomaly Congenital eye disorder Congenital  
 foot malformation Congenital genitourinary abnormality  
 Conjunctival disorder Conjunctival haemorrhage  
 Conjunctivitis Connective tissue disorder Constipation  
 Conversion disorder Convulsion Coordination abnormal  
 Corneal deposits Corneal lesion Corneal oedema Corneal  
 opacity Coronary artery disease Coronary artery occlusion  
 Costochondritis Cough Crocodile tears syndrome Crying  
 Cyanosis Cystitis Cystitis noninfective Cytolytic  
 hepatitis Dandruff Deafness Death Decreased appetite  
 Decreased interest Decubitus ulcer Deep vein thrombosis  
 Deficiency anaemia Dehydration Delirium Delusion  
 Dementia Dementia with Lewy bodies Dental caries  
 Dependence Depersonalisation Depressed level of consciousness  
 Depressed mood Depression Depression suicidal Depressive  
 symptom Derealisation Dermal cyst Dermatitis atopic Dermatitis  
 bullous Dermatitis contact Dermatitis exfoliative Dermatitis  
 infected Dermoid cyst Developmental delay Diabetes mellitus  
 Diabetic coma Diabetic hyperglycaemic coma Diabetic  
 hyperosmolar coma Diabetic ketoacidosis Diaphragmatic hernia



Diarrhoea Diplopia Discomfort Disorientation  
 Disseminated intravascular coagulation Dissociation  
 Dissociative disorder Disturbance in attention Disturbance  
 in sexual arousal Diverticulitis Dizziness Dizziness exertional  
 Dizziness postural Drooling Drug abuse Drug dependence  
 Drug eruption Drug hypersensitivity Drug ineffective Drug  
 interaction Drug intolerance Drug level increased Drug withdrawal  
 syndrome Drug withdrawal syndrome neonatal Dry eye Dry mouth  
 Dry skin Dry throat Duodenal ulcer Duodenal ulcer  
 haemorrhage Duodenitis Dysarthria Dysentery Dysgeusia Dysgraphia  
 Dyskinesia Dysmenorrhoea Dyspepsia Dysphagia Dysphemia  
 Dysphonia Dysphoria Dyspnoea Dyspnoea exertional  
 Dystonia Dysuria Ear disorder Ear infection Ear  
 pain Ecchymosis Eclampsia Eczema Effusion Ejaculation  
 delayed Ejaculation disorder Ejaculation failure Elastosis  
 perforans Elderly Electrocardiogram QRS complex  
 Electrocardiogram QT prolonged Electrocardiogram ST segment  
 depression Electrocardiogram ST segment elevation Electrocardiogram  
 T wave inversion Electrocardiogram abnormal Electrocardiogram  
 change Electrocardiogram normal Electroencephalogram  
 abnormal Electrolyte imbalance Elevated mood Embolism  
 Emotional distress Emphysema Encephalopathy Endocrine  
 disorder Endometrial cancer Endometrial neoplasm Energy  
 increased Enteritis Enuresis Enzyme abnormality Eosinophil  
 count increased Eosinophilia Epicondylitis Epididymitis  
 Epilepsy Epistaxis Erectile dysfunction Eructation  
 Erythema Erythema multiforme Erythromelalgia Euphoric  
 mood Exfoliative rash Exostosis Extensor plantar response  
 Extrapyrarnidal disorder Extrasystoles Extravasation  
 Eye discharge Eye disorder Eye haemorrhage Eye  
 infection Eye inflammation Eye irritation Eye movement disorder  
 Eye pain Eye pruritus Eye swelling Eyelid disorder  
 Eyelid function disorder Eyelid oedema Eyelid ptosis  
 Face oedema Facial pain Facial paresis Faecal incontinence  
 Faecalith Faecaloma Faeces discoloured Faeces hard  
 Fasciitis Fasting Fatigue Fear Feeling abnormal  
 Feeling cold Feeling hot Feeling jittery Female sexual  
 dysfunction Fibroadenoma of breast Fibrocystic breast disease  
 Fibrosis Flank pain Flashback Flat affect Flatulence Fluid  
 overload Fluid retention Flushing Foetor hepaticus  
 Folliculitis Formication Fungal infection Fungal skin  
 infection Furuncle Gait disturbance Galactorrhoea Gallbladder  
 cancer Gallbladder disorder Gamma-glutamyltransferase  
 increased Gangrene Gastric cancer Gastric disorder Gastric  
 haemorrhage Gastric pH decreased Gastric polyps Gastric ulcer  
 Gastric ulcer haemorrhage Gastritis Gastritis haemorrhagic  
 Gastroenteritis Gastrointestinal disorder Gastrointestinal  
 haemorrhage Gastrointestinal infection Gastrointestinal neoplasm  
 Gastrointestinal obstruction Gastrointestinal pain  
 Gastrointestinal stromal tumour Gastrooesophageal reflux  
 disease Generalised oedema Genital candidiasis Genital  
 discharge Gestational hypertension Gingival bleeding Gingival  
 infection Gingival pain Gingival recession Gingivitis  
 Glaucoma Glossitis Glossodynia Glucose tolerance decreased  
 Glucose tolerance impaired Glycosuria Glycosylated

haemoglobin increased Goitre Gout Grand mal convulsion  
 Gravitational oedema Grimacing Groin pain Gynaecomastia  
 Haemangioma Haematemesis Haematochezia Haematocrit  
 decreased Haematoma Haematuria Haemoglobin Haemoglobin decreased  
 Haemoglobin increased Haemoglobinuria Haemolysis Haemolytic  
 anaemia Haemoptysis Haemorrhage Haemorrhage intracranial  
 Haemorrhoids Haemothorax Hallucination Hallucination,  
 auditory Hallucination, visual Hangover Head discomfort Head  
 titubation Headache Hearing impaired Heart disease congenital  
 Heart rate irregular Hemianopia Hemiparesis Hemiplegia  
 Hepatic cirrhosis Hepatic enzyme increased Hepatic failure  
 Hepatic function abnormal Hepatic neoplasm malignant  
 Hepatic steatosis Hepatitis Hepatitis A Hepatitis cholestatic  
 Hepatobiliary disease Hepatocellular injury Hepatomegaly  
 Hereditary disorder Hernia Herpes simplex Herpes  
 virus infection Herpes zoster Hiccups Hirsutism Homicidal  
 ideation Hordeolum Hormone level abnormal Hostility Hot flush  
 Hunger Hydrocephalus Hyperacusis Hyperaemia  
 Hyperaesthesia Hyperammonaemia Hyperbilirubinaemia  
 Hyperchloraemia Hyperchlorhydria Hypercholesterolaemia  
 Hyperglycaemia Hyperhidrosis Hyperinsulinism  
 Hyperkalaemia Hyperkeratosis Hyperkinesia  
 Hyperlipidaemia Hypermagnesaemia Hypernatraemia  
 Hyperparathyroidism Hyperphagia Hyperphosphataemia  
 Hyperplasia Hyperprolactinaemia Hyperpyrexia  
 Hyperreflexia Hypersensitivity Hypersexuality Hypersomnia  
 Hypertension Hypertensive crisis Hyperthermia  
 Hypert thyroidism Hypertonia Hypertonic bladder  
 Hypertrichosis Hypertriglyceridaemia Hypertrophy  
 Hyperuricaemia Hyperuricosuria Hyperventilation  
 Hypoaesthesia Hypoaesthesia oral Hypocalcaemia  
 Hypochloraemia Hypocholesterolaemia Hypochromic anaemia  
 Hypoglycaemia Hypogonadism Hypohidrosis  
 Hypokalaemia Hypokinesia Hypomagnesaemia Hypomania  
 Hypomenorrhoea Hyponatraemia Hypophagia Hypoproteinaemia  
 Hyporeflexia Hypotension Hypothermia Hypothyroidism  
 Hypotonia Hypoventilation Hypovitaminosis Hypovolaemia  
 Hypoxia Idiopathic thrombocytopenic purpura Ileus Ileus  
 paralytic Ill-defined disorder Illusion Immobile Immune  
 system disorder Impaired healing Inappropriate antidiuretic hormone  
 secretion Incontinence Increased appetite Increased  
 tendency to bruise Induration Infarction Infected cyst  
 Infection Infestation Inflammation Influenza Influenza  
 like illness Inguinal hernia Initial insomnia Injection site  
 mass Injection site pain Injection site phlebitis Injection  
 site reaction Inner ear disorder Insomnia Intention tremor  
 Intentional self-injury Intermittent claudication  
 Intertitial lung disease Intervertebral disc degeneration  
 Intervertebral disc disorder Intervertebral disc protrusion  
 Intervertebral discitis Intestinal functional disorder  
 Intestinal obstruction Intestinal perforation Intracranial  
 pressure increased Iron deficiency Iron deficiency anaemia  
 Irritability Irritable bowel syndrome Ischaemia  
 Ischaemic hepatitis Ischaemic stroke Jaundice Jaundice  
 cholestatic Joint contracture Joint effusion Joint range of motion

decreased Joint stiffness Joint swelling Judgement impaired  
Keratitis Keratoconjunctivitis sicca Keratopathy  
Ketoacidosis Ketosis Laboratory test abnormal  
Lacrimal disorderLacrimation decreased Lacrimation increased  
Lactose intolerance Laryngeal cancer Laryngeal disorder  
Laryngeal neoplasm Laryngeal oedema Laryngitis  
Laryngospasm Left ventricular failure Leiomyoma Lens  
disorder Lenticular opacities Lenticular pigmentation  
Lethargy Leukaemia Leukocytosis Leukoderma Leukopenia  
Leukoplakia oral Libido decreased Libido increased Lichenoid  
keratosis Light anaesthesiaLip and/or oral cavity cancer Lip  
blister Lip dry Lip swelling Lipoma Livedo  
reticularisLiver disorder Liver function test abnormalLiver  
injury Lividity Lobar pneumonia Localised infection  
Localised oedema Logorrhoea Loss of consciousness Loss of  
libido Lower respiratory tract infection Lung adenocarcinoma  
stage I Lung cancer metastatic Lung disorder Lung infiltration  
Lung neoplasm malignant Lymphadenitis Lymphadenopathy  
Lymphatic disorder Lymphocytic leukaemia Lymphocytosis  
LymphoedemaLymphoma LymphopeniaMacular degeneration  
Macule MaculopathyMajor depression Malaise Male sexual  
dysfunctionMalignant melanoma ManiaMasked facies Mastitis  
Mediastinal disorder Megacolon Melaena Melanocytic  
naevus Memory impairmentMeningitis Menopausal symptoms  
Menopause MenorrhagiaMenstrual disorder Menstruation  
delayed Menstruation irregular Mental disabilityMental disorder  
Mental retardation Mental status changes Metabolic  
alkalosis Metastasis Metastatic neoplasm Methaemoglobinaemia  
Metrorrhagia Micturition disorder Micturition urgency  
Middle ear disorder Middle ear effusion Middle insomnia  
Migraine with aura Migraine without aura Miosis  
Mitral valve incompetence Mobility decreased  
Monarthritits MonocytosisMood swingsMotion sickness Mouth  
ulceration Movement disorderMultiple myeloma Muscle atrophy  
Muscle contractions involuntary Muscle contracture  
Muscle enzyme increased Muscle relaxant therapy  
Muscle rigidity Muscle spasms Muscle tightness Muscle  
twitching Muscular weaknessMusculoskeletal chest pain  
Musculoskeletal discomfort Musculoskeletal disorder  
Musculoskeletal pain Musculoskeletal stiffness Myalgia  
Myasthenic syndrome Mydriasis Myelitis Myocardial  
infarction Myocardial ischaemia MyocarditisMyoclonus Myopathy  
Myopia Myositis Nail disorder Nail infection  
Narcolepsy Nasal congestion Nasal disorder Nasal dryness  
Nasal oedema Nasal polyps Nasopharyngitis Nausea  
Neck pain Necrosis Necrosis ischaemic Neoplasm  
malignant Neoplasm prostateNeoplasm recurrence Neoplasm skin  
Nephritis Nephrolithiasis Nephrotic syndrome Nerve root  
lesion Nervous system disorder NervousnessNeuralgia  
Neuritis Neurodermatitis Neurogenic bladder Neuroleptic  
malignant syndrome Neurological symptom Neuroma Neuropathy  
peripheral Neurosis NeutropeniaNeutrophil count decreased  
Neutrophil count increased Night sweats Nightmare  
Nocturia Nodal arrhythmia Nodule Normochromic  
normocytic anaemia Nuchal rigidity Nystagmus Obesity

Obsessive thoughts      Obstruction      Obstructive airways disorder  
 Ocular hyperaemia      Oculogyric crisis      Oedema      Oedema peripheral  
 Oesophageal carcinoma      Oesophageal disorder      Oesophageal spasm  
 Oesophageal stenosis      Oesophageal ulcer      Oesophagitis  
 Oligomenorrhoea      Oliguria      Onychomycosis      Opisthotonus  
 Optic nerve disorder      Oral candidiasis      Oral neoplasm benign  
 Oral pain      Orchitis noninfective      Oropharyngeal discomfort  
 Oropharyngeal pain      Oropharyngeal spasm      Orthostatic  
 hypotension      Osteoarthritis      Osteoarthropathy      Osteodystrophy  
 Osteomyelitis      Osteonecrosis      Osteopenia      Osteoporosis  
 Otitis externa      Otitis media      Otitis media chronic  
 Ovarian cancer      Ovarian cyst      Pain      Pain in extremity      Pain  
 in jaw      Pallor      Palpitations      Pancreatitis acute  
 Pancytopenia      Panic attack      Panic disorder      Panic  
 disorder with agoraphobia      Panic reaction      Papilloma  
 Paraesthesia oral      Paralysis      Paranoia      Parasomnia      Paresis  
 Parkinsonian gait      Parkinsonism      Paronychia      Parosmia  
 Parotid gland enlargement      Pathological fracture  
 Pathological gambling      Pelvic inflammatory disease      Pelvic pain  
 Penis disorder      Peptic ulcer      Pericardial effusion  
 Pericarditis constrictive      Perineal pain      Periodontitis  
 Periorbital oedema      Peripheral coldness      Peripheral  
 ischaemia      Peripheral vascular disorder      Peritoneal adhesions  
 Personality disorder      Petechiae      Petit mal epilepsy  
 Pheochromocytoma      Pharyngeal disorder      Pharyngeal erythema  
 Pharyngitis      Phlebitis      Phlebitis superficial      Phobia  
 Phonological disorder      Photophobia      Photopsia      Photosensitivity  
 allergic reaction      Photosensitivity reaction      Pigmentation disorder  
 Piloerection      Pituitary tumour benign      Plasmacytoma  
 Platelet count decreased      Pleural disorder      Pleural effusion  
 Pleural fibrosis      Pleurisy      Pneumonia      Pneumonia aspiration  
 Pneumothorax      Poisoning      Poliomyelitis      Pollakiuria  
 Polycythaemia      Polydipsia      Polymyalgia rheumatica      Polyp  
 Polyuria      Porphyria      Post procedural infection  
 Postmenopausal haemorrhage      Postural orthostatic tachycardia  
 syndrome      Posture abnormal      Pre-eclampsia      Precocious puberty  
 Pregnancy test false positive      Pregnancy test positive  
 Premature ejaculation      Premenstrual syndrome      Presyncope  
 Priapism      Proctalgia      Productive cough      Prolactinoma  
 Prostate cancer      Prostatic adenoma      Prostatic disorder  
 Prostatitis      Protein urine present      Proteinuria      Protrusion tongue  
 Prurigo      Pruritus      Pruritus generalised      Pruritus genital  
 Pseudolymphoma      Psoriasis      Psychiatric symptom      Psychomotor  
 retardation      Psychotic behaviour      Psychotic disorder      Puberty  
 Pulmonary congestion      Pulmonary embolism      Pulmonary  
 fibrosis      Pulmonary function test decreased      Pulmonary hypertension  
 Pulmonary oedema      Pulse absent      Purpura      Purpura non-  
 thrombocytopenic      Pyelonephritis      Pyoderma      Pyuria      Rales      Rash  
 erythematous      Rash generalised      Rash maculo-papular      Rash  
 morbilliform      Rash papular      Rash pustular      Rash vesicular  
 Raynaud's phenomenon      Rectal cancer      Rectal haemorrhage  
 Rectal tenesmus      Red blood cell count decreased      Red blood  
 cell sedimentation rate increased      Reflux oesophagitis      Regressive  
 behaviour      Regurgitation      Renal artery stenosis      Renal colic      Renal  
 cyst      Renal failure acute      Renal impairment      Renal neoplasm      Renal

pain Respiratory alkalosis Respiratory arrest Respiratory  
 depression Respiratory disorder Respiratory distress Respiratory  
 failure Respiratory tract congestion Respiratory tract infection  
 Respiratory tract infection viral Restless legs syndrome  
 Retching Retinal artery occlusion Retinal detachment  
 Retinal disorder Retinal vascular disorder Retinitis  
 pigmentosa Retrograde ejaculation Retroperitoneal fibrosis  
 Rhabdomyolysis Rheumatoid arthritis Rhinitis Rhinitis  
 allergic Rhinitis seasonal Rhinorrhoea Rhonchi Rosacea  
 Rotator cuff syndrome Sacroiliitis Saliva altered  
 Salivary duct obstruction Salivary gland disorder  
 Salivary gland enlargement Salivary hypersecretion  
 Salpingitis Sarcoidosis Sarcoma Scab Schizoaffective  
 disorder Schizophrenia Schizophreniform disorder Sciatica  
 Scleral disorder Scotoma Seasonal allergy Seborrhoeic  
 dermatitis Seborrhoeic keratosis Sedation Sensation of heaviness  
 Sensory disturbance Sensory loss Sepsis Septic  
 shock Severe acute respiratory syndrome Sexual dysfunction Shock  
 Sialoadenitis Sicca syndrome Sick sinus syndrome Sinus  
 arrhythmia Sinus bradycardia Sinus congestion Sinus disorder Sinus  
 headache Sinus tachycardia Sinusitis Skin burning sensation Skin  
 cancer Skin discolouration Skin disorder Skin exfoliation  
 Skin hyperpigmentation Skin hypertrophy Skin infection Skin  
 irritation Skin lesion Skin mass Skin odour abnormal Skin  
 papilloma Skin ulcer Sleep apnoea syndrome Sleep attacks Sleep  
 disorder Sleep paralysis Sleep talking Sluggishness Small  
 intestinal obstruction Sneezing Snoring Social avoidant  
 behaviour Somnambulism Somnolence Speech disorder Spinal  
 osteoarthritis Spine malformation Splenomegaly Spondylitis  
 Squamous cell carcinoma Status epilepticus Stevens-  
 Johnson syndrome Sticky skin Stomatitis Stress Stridor  
 Stupor Subarachnoid haemorrhage Subcutaneous abscess  
 Subcutaneous nodule Subdural haematoma Sudden death  
 Suicidal ideation Suicide attempt Sulphaemoglobinaemia  
 Superior sagittal sinus thrombosis Supraventricular  
 extrasystoles Supraventricular tachycardia Surgery  
 Suspiciousness Swelling Swelling face Swollen tongue  
 Syncope Synostosis Synovitis Systemic lupus erythematosus  
 Tachycardia Tachypnoea Tardive dyskinesia Temperature  
 intolerance Tenderness Tendonitis Tenosynovitis Tension  
 Tension headache Terminal insomnia Testicular disorder  
 Testicular pain Testicular swelling Tetanus Tetany  
 Therapeutic response decreased Therapeutic response  
 increased Thinking abnormal Thirst Thought blocking Throat  
 irritation Throat tightness Thrombocytopenia Thrombocytopenic  
 purpura Thrombocytosis Thrombophlebitis Thrombosis Thrombotic  
 thrombocytopenic purpura Thyroid adenoma Thyroid cancer  
 Thyroid neoplasm Thyroiditis Tic Tinnitus Tongue  
 discolouration Tongue disorder Tongue dry Tongue oedema  
 Tongue paralysis Tongue spasm Tongue ulceration Tonsillar  
 hypertrophy Tonsillitis Tooth abscess Tooth disorder Tooth  
 impacted Tooth infection Toothache Torsade de pointes  
 Torticollis Toxic epidermal necrolysis Tracheobronchitis  
 Transaminases increased Transient ischaemic attack  
 Tremor Trismus Tuberculin test positive

Tubulointerstitial nephritis Tunnel vision Ulcer Ulcer  
 haemorrhage Umbilical hernia Unevaluable event Unintended pregnancy  
 Unresponsive to stimuli Upper respiratory tract infection  
 Upper-airway cough syndrome Urethral disorder Urethral pain  
 Urethritis Urinary hesitation Urinary incontinence  
 Urinary retention Urinary tract disorder Urinary tract  
 infection Urine abnormality Urine analysis abnormal Urine  
 output increased Urosepsis Urticaria Uterine disorder Uterine  
 haemorrhage Uterine leiomyoma Uterine neoplasm Uterovaginal prolapse  
 VIIth nerve paralysis Vaginal discharge Vaginal haemorrhage  
 Vaginal infection Vaginal inflammation Varicose vein  
 Vascular purpura Vasculitis Vasoconstriction Vasodilation  
 procedure Vasospasm Vein disorder Venous thrombosis Ventricular  
 arrhythmia Ventricular extrasystoles Ventricular failure  
 Ventricular fibrillation Ventricular hypertrophy  
 Ventricular tachycardia Vertigo Vestibular ataxia  
 Vestibular disorder Viral diarrhoea Viral infection  
 Vision blurred Visual acuity reduced Visual impairment  
 Vitamin B12 deficiency Vitreous detachment Vitreous floaters  
 Vocal cord paralysis Vomiting Vulvovaginal candidiasis  
 Vulvovaginal dryness Vulvovaginal mycotic infection  
 Vulvovaginal pruritus Vulvovaginitis Water intoxication  
 Weight decreased Weight fluctuation Weight increased  
 Wheezing White blood cell count decreased White blood cell  
 count increased White blood cells urine positive Withdrawal bleed  
 Withdrawal syndrome Wound infection Xerophthalmia  
 Xerosis Yawning

\*\*\*\*\*  
 \*\*\*\*\*

Amiloride-sensitive sodium channel subunit gamma - Group: Channel  
 Treated with:

triamterene: approved small molecule (25 associated side  
 effects) For the treatment of edema associated with congestive  
 heart failure, cirrhosis of the liver, and the nephrotic syndrome;  
 also in steroid-induced edema, idiopathic edema, and edema due to  
 secondary hyperaldosteronism.

amiloride: approved small molecule (85 associated side effects)  
 For use as adjunctive treatment with thiazide diuretics or  
 other kaliuretic-diuretic agents in congestive heart failure or  
 hypertension.

98 known side effects mediated through drugs targeting this protein:

Abdominal distension Abdominal pain Agitation Alopecia  
 Anaemia Anaemia megaloblastic Anaphylactic shock  
 Angina pectoris Aplastic anaemia Arthralgia Asthenia  
 Atrioventricular block Atrioventricular block complete  
 Azotaemia Back pain Bladder pain Bladder spasm Blood  
 potassium increased Blood urea increased Bradycardia Chest pain  
 Coma Confusional state Constipation Cough Decreased  
 appetite Dehydration Dermatitis Diarrhoea Disturbance in sexual  
 arousal Dizziness Dry mouth Dyspepsia Dyspnoea Dysuria  
 Encephalopathy Erectile dysfunction Fatigue Feeling  
 abnormal Flatulence Foetor hepaticus Gastrointestinal haemorrhage  
 Gastrointestinal pain Gynaecomastia Haemoglobin Haemorrhage  
 Headache Hepatic encephalopathy Hepatic function abnormal

Hepatocellular injury Hyperkalaemia Hyperkinesia  
Hypersensitivity Hypokalaemia Hyponatraemia Hypotension  
Insomnia Intraocular pressure increased Jaundice  
Libido decreased Liver disorder Muscle spasms Muscular  
weakness Musculoskeletal discomfort Nasal congestion Nausea  
Neck pain Nephritis Nephrolithiasis Nervousness Neutropenia  
Oral pruritus Orthostatic hypotension Pain Pain in  
extremity Palpitations Paraesthesia Paralysis flaccid  
Peptic ulcer Photosensitivity reaction Pollakiuria  
Polyuria Pruritus Rash Renal failure acute Shock  
Somnolence Tension Thirst Thrombocytopenia Tinnitus  
Tremor Tubulointerstitial nephritis Ulcer Urine output  
increased Vertigo Visual impairment Vomiting

\*\*\*\*\*  
\*\*\*\*\*

ATP-binding cassette transporter sub-family C member 9 - Group:  
Transporter

Treated with:

adenosine triphosphate: approved, nutraceutical small molecule  
(0 associated side effects) For nutritional supplementation,  
also for treating dietary shortage or imbalance  
glyburide: approved small molecule (52 associated side effects)  
Indicated as an adjunct to diet to lower the blood glucose in  
patients with NIDDM whose hyperglycemia cannot be satisfactorily  
controlled by diet alone.

52 known side effects mediated through drugs targeting this protein:

Abdominal distension Abdominal pain Agranulocytosis Anaemia  
Angioedema Aplastic anaemia Arthralgia Asthenia Cholestasis  
Diarrhoea Dyspepsia Dyspnoea Erythema Erythropenia  
Gastrointestinal disorder Gastrointestinal pain Haemolytic  
anaemia Hepatic failure Hepatic function abnormal Hepatitis  
Hypersensitivity Hyponatraemia Hypopituitarism Hypotension  
Inappropriate antidiuretic hormone secretion Jaundice  
Jaundice cholestatic Leukocytoclastic vasculitis Leukopenia  
Liver disorder Malnutrition Musculoskeletal discomfort  
Myalgia Nausea Nephropathy Nervous system disorder  
Pain Pancytopenia Photosensitivity reaction Porphyria  
Porphyria non-acute Pruritus Purpura Rash Shock  
Thrombocytopenia Urticaria Vascular purpura Vasculitis  
Vision blurred Visual impairment Vomiting

\*\*\*\*\*  
\*\*\*\*\*

Retinoic acid receptor gamma-1 - Group: Receptor

Treated with:

adapalene: approved small molecule (35 associated side effects)  
For the topical treatment of comedo, papular and pustular acne  
(acne vulgaris) of the face, chest or back.  
acitretin: approved small molecule (165 associated side  
effects) For the treatment of severe psoriasis in adults.  
alitretinoin: approved small molecule (0 associated side  
effects) For topical treatment of cutaneous lesions in patients  
with AIDS-related Kaposi's sarcoma.

tazarotene: approved small molecule (23 associated side effects)  
 Used to treat psoriasis, acne and sun damaged skin  
 (photodamage).

etretinate: withdrawn small molecule (0 associated side effects)  
 For the treatment of severe psoriasis in adults.

sr11254: experimental small molecule (0 associated side effects)

4-[3-oxo-3-(5,5,8,8-tetramethyl-5,6,7,8-tetrahydro-naphthalen-2-yl)-propenyl]-benzoic acid: experimental small molecule (0 associated side effects)

cd564: experimental small molecule (0 associated side effects)

dodecyl-alpha-d-maltoside: experimental small molecule (0 associated side effects)

bms184394: experimental small molecule (0 associated side effects)

r-3-fluoro-4-[2-hydroxy-2-(5,5,8,8-tetramethyl-5,6,7,8,-tetrahydro-naphthalen-2-yl)-acetylamino]-benzoic acid: experimental small molecule (0 associated side effects)

195 known side effects mediated through drugs targeting this protein:

Abdominal pain Acne Ageusia Alcohol intolerance Alopecia  
 Angioedema Anorectal discomfort Anorectal disorder  
 Arthralgia Arthritis Arthropathy Asthenia Atopy Atrophy  
 Back pain Balanoposthitis Benign intracranial hypertension  
 Bleeding time prolonged Blepharitis Blister Blood  
 creatinine increased Blood triglycerides increased Blood uric  
 acid increased Body temperature increased Bone pain Burning  
 sensation Bursitis Calcinosis Candidiasis Cataract subcapsular  
 Cerumen impaction Chapped lips Cheilitis Chest pain  
 Chills Cold sweat Congenital eye disorder  
 Conjunctivitis Constipation Convulsion Corneal  
 neovascularisation Cough Crocodile tears syndrome Deafness  
 Decreased appetite Dermatitis atopic Dermatitis bullous  
 Dermatitis contact Diarrhoea Discomfort Dry eye Dry  
 mouth Dry skin Dysgeusia Dyspepsia Dysphonia Dysuria Ear  
 infection Ear pain Eczema Epistaxis Erectile dysfunction  
 Erythema Exostosis Eye disorder Eye irritation Eye  
 pain Eyelid oedema Face oedema Facial pain Fatigue Febrile  
 neutropenia Feeling abnormal Flushing Foetal disorder Gait  
 disturbance Gastrointestinal pain Genital discharge Gingival bleeding  
 Gingivitis Glossitis Granuloma Haemoglobin Haemorrhage Hair  
 texture abnormal Headache Hepatitis Herpes simplex Herpes  
 virus infection High density lipoprotein decreased Hordeolum Hot  
 flush Hyperaesthesia Hypercholesterolaemia Hyperhidrosis  
 Hyperlipidaemia Hypersensitivity Hypertonia  
 Hypertriglyceridaemia Hypertrophy Hypervitaminosis  
 Hypervitaminosis A Hypoaesthesia Ill-defined disorder  
 Impaired healing Increased appetite Infection  
 Inflammation Insomnia Interstitial lung disease  
 Iritis Jaundice Keratitis Lacrimation decreased  
 Lacrimation increased Laryngitis Lip dry Lip swelling  
 Liver function test abnormal Localised oedema Madarosis  
 Malaise Mass Melaena Menopausal symptoms Mouth



ulceration Muscle spasms Muscular weakness Musculoskeletal  
discomfort Myalgia Nasal dryness Nausea Nervousness  
Neutropenia Nodule Oedema Oedema peripheral Optic  
neuritis Osteoarthritis Otitis externa Pain Pancreatitis  
Pancytopenia Papilloedema Pharyngitis Photophobia  
Photosensitivity reaction Proctalgia Pruritus Purpura  
Pyogenic granuloma Rash Rash vesicular Rectal tenesmus  
Retinal haemorrhage Rhinitis Saliva altered Salivary  
hypersecretion Scab Scotoma Seborrhoeic dermatitis  
Sensitisation Sinusitis Skin atrophy Skin  
discolouration Skin disorder Skin exfoliation Skin fissures  
Skin hyperpigmentation Skin hypertrophy Skin irritation Skin  
mass Skin oedema Skin ulcer Somnolence Sticky skin Stomatitis  
Swelling Tension Thirst Tinnitus Tongue ulceration  
Ulcer Urinary tract infection Urine abnormality Urine  
analysis abnormal Urticaria Vascular purpura Vasculitis Vision  
blurred Visual acuity reduced Vulvovaginitis Weight decreased  
White blood cell count decreased Xerophthalmia

\*\*\*\*\*  
\*\*\*\*\*

Retinoic acid receptor RXR-gamma - Group: Receptor

Treated with:

adapalene: approved small molecule (35 associated side effects)

For the topical treatment of comedo, papular and pustular acne (acne vulgaris) of the face, chest or back.

bexarotene: approved small molecule (153 associated side effects) Used orally for the treatment of skin manifestations of cutaneous T-cell lymphoma (CTCL) in patients who are refractory to at least one prior systemic therapy. Also used topically for the treatment of skin lesions in early (stage IA and IB) CTCL in patients who experience refractory or persistent disease with the use of other therapies or are intolerant of other therapies.

acitretin: approved small molecule (165 associated side effects) For the treatment of severe psoriasis in adults.

alitretinoin: approved small molecule (0 associated side effects) For topical treatment of cutaneous lesions in patients with AIDS-related Kaposi's sarcoma.

etretinate: withdrawn small molecule (0 associated side effects)

For the treatment of severe psoriasis in adults.

267 known side effects mediated through drugs targeting this protein:

Abdominal infection Abdominal pain Acne Ageusia Agitation

Alanine aminotransferase increased Albuminuria Alcohol

intolerance Alopecia Anaemia Angina pectoris Angioedema

Anorectal discomfort Anorectal disorder Arrhythmia

Arthralgia Arthritis Arthropathy Aspartate aminotransferase

increased Asthenia Ataxia Atopy Atrophy Back pain

Bacterial infection Balanoposthitis Benign intracranial

hypertension Bleeding time prolonged Blepharitis Blood

amylase increased Blood creatinine increased Blood lactate

dehydrogenase increased Blood triglycerides increased Blood

uric acid increased Body temperature increased Bone pain

Breast pain Bronchitis Bursitis Calcinosis Candidiasis

Cardiac failure Cataract Cataract subcapsular Cellulitis

Cerebrovascular accident Cerumen impaction Chapped lips  
 Cheilitis Chest pain Chills Coagulation time prolonged  
 Cold sweat Colitis Confusional state Congenital eye  
 disorder Conjunctivitis Constipation Convulsion Corneal  
 lesion Corneal neovascularisation Cough Crocodile tears  
 syndrome Deafness Decreased appetite Dermatitis atopic  
 Dermatitis bullous Dermatitis contact Dermatitis  
 exfoliative Diarrhoea Discomfort Dizziness Dry eye Dry mouth  
 Dry skin Dysgeusia Dyspepsia Dysphonia Dyspnoea  
 Dysuria Ear infection Ear pain Eczema Effusion  
 Eosinophilia Epistaxis Erectile dysfunction Erythema  
 Exostosis Eye disorder Eye irritation Eye pain  
 Eyelid oedema Face oedema Fasting Fatigue Febrile  
 neutropenia Feeling abnormal Flatulence Flushing Foetal disorder  
 Gait disturbance Gastroenteritis Gastrointestinal pain  
 Genital discharge Gingival bleeding Gingivitis Glossitis  
 Granuloma Haematoma Haematuria Haemoglobin Haemoptysis  
 Haemorrhage Hair texture abnormal Headache Hepatic failure  
 Hepatitis Herpes simplex Herpes virus infection High  
 density lipoprotein decreased Hordeolum Hot flush  
 Hyperaesthesia Hyperbilirubinaemia Hypercholesterolaemia  
 Hyperglycaemia Hyperhidrosis Hyperkalaemia  
 Hyperlipidaemia Hypernatraemia Hypersensitivity  
 Hypertension Hypertonia Hypertriglyceridaemia Hypertrophy  
 Hypervitaminosis Hypervitaminosis A Hypoaesthesia  
 Hypocalcaemia Hypochromic anaemia Hyponatraemia  
 Hypoproteinaemia Hypothyroidism Hypoxia Ill-defined  
 disorder Impaired healing Incontinence Increased appetite  
 Infection Inflammation Influenza Insomnia  
 Interstitial lung disease Iritis Jaundice Keratitis  
 Lacrimation decreased Lacrimation increased Laryngitis  
 Lethargy Leukopenia Lip dry Lip swelling Liver  
 function test abnormal Loss of consciousness Lymphadenopathy  
 Lymphocytosis Madarosis Malaise Mass Melaena  
 Menopausal symptoms Micturition urgency Mouth ulceration  
 Muscle spasms Muscular weakness Musculoskeletal discomfort  
 Myalgia Nasal dryness Nausea Nervousness Neuropathy  
 peripheral Neutropenia Nodule Oedema Oedema peripheral Optic  
 neuritis Osteoarthritis Otitis externa Pain Pancreatic  
 disorder Pancreatitis acute Pancytopenia Papilloedema  
 Paraesthesia Pharyngitis Photophobia Photosensitivity  
 reaction Pleural disorder Pleural effusion Pneumonia Pollakiuria  
 Proctalgia Pruritus Pulmonary oedema Purpura Pyogenic  
 granuloma Rash Rash maculo-papular Rash papular Rash  
 pustular Rash vesicular Rectal tenesmus Renal impairment  
 Retinal haemorrhage Rhinitis Right ventricular failure  
 Saliva altered Salivary hypersecretion Scab Scotoma  
 Seborrhoeic dermatitis Sepsis Shock Sinusitis Skin  
 atrophy Skin discolouration Skin disorder Skin exfoliation  
 Skin fissures Skin hypertrophy Skin irritation Skin mass  
 Skin oedema Skin ulcer Somnolence Sticky skin Stomatitis  
 Subdural haematoma Swelling Syncope Tachycardia  
 Tension Thirst Thrombocytopenia Thrombocytosis  
 Tinnitus Tongue ulceration Type 2 diabetes mellitus Ulcer  
 Urinary incontinence Urinary tract infection Urine

abnormality Urine analysis abnormal      Urticaria    Vascular purpura  
Vasculitis Vision blurred    Visual acuity reduced Vomiting  
Vulvovaginitis    Weight decreased Weight increased White blood  
cell count decreased    White blood cell disorder    Xerophthalmia

\*\*\*\*\*  
\*\*\*\*\*

Excitatory amino acid transporter 1 - Group: Transporter

Treated with:

l-glutamic acid: approved, nutraceutical small molecule (0 associated side effects) Considered to be nature's "Brain food" by improving mental capacities; helps speed the healing of ulcers; gives a "lift" from fatigue; helps control alcoholism, schizophrenia and the craving for sugar.

known side effects mediated through drugs targeting this protein:

\*\*\*\*\*  
\*\*\*\*\*

Gamma-aminobutyric acid type B receptor, subunit 1 - Group: Receptor  
Treated with:

baclofen: approved small molecule (192 associated side effects) For the alleviation of signs and symptoms of spasticity resulting from multiple sclerosis, particularly for the relief of flexor spasms and concomitant pain, clonus, and muscular rigidity.  
progabide: approved small molecule (0 associated side effects)

Indicated for the treatment of epilepsy.

vigabatrin: approved small molecule (213 associated side effects) For use as an adjunctive treatment (with other drugs) in treatment resistant epilepsy, complex partial seizures, secondary generalized seizures, and for monotherapy use in infantile spasms in West syndrome.

318 known side effects mediated through drugs targeting this protein:

Abdominal discomfort    Abdominal distension    Abdominal pain  
Abdominal pain upper    Abnormal behaviour    Abnormal dreams  
Accommodation disorder    Acute psychosis    Affect lability  
Ageusia    Aggression    Agitation    Akathisia    Albuminuria  
Alopecia    Amnesia    Anaemia    Angioedema    Anxiety  
Aortic dissection    Apathy    Aplasia    Apnoea  
Arachnoiditis    Arrhythmia    Arthralgia    Arthropathy    Aspartate  
aminotransferase increased    Aspiration    Asthenia    Asthenopia  
Ataxia    Atrophy    Autonomic nervous system imbalance  
Back pain    Bladder pain    Bladder spasm    Blindness    Blood alkaline  
phosphatase increased    Body temperature decreased    Body temperature  
increased    Bradycardia    Bronchitis    Candidiasis    Cardiac output  
decreased    Cerebral ischaemia    Chest pain    Chills    Cholestasis  
Coma    Completed suicide    Confusional state    Congenital anomaly  
Congenital genital malformation    Congenital oral malformation  
Conjunctivitis    Constipation    Conversion disorder  
Convulsion    Coordination abnormal    Cough    Croup infectious  
Deafness    Death    Decreased appetite    Deep vein thrombosis  
Dehydration    Delayed puberty    Delirium    Dentofacial anomaly  
Dependence    Depressed level of consciousness    Depressed mood  
Dermatitis contact    Developmental coordination disorder

Developmental delay    Diarrhoea    Diplopia    Discomfort  
 Disorientation    Disturbance in attention    Dizziness    Drug  
 dependence    Drug ineffective    Dry mouth    Dysarthria    Dysmenorrhoea  
 Dysmorphism    Dyspepsia    Dysphagia    Dysphoria    Dysplasia  
 Dyspnoea    Dystonia    Dysuria    Ear disorder    Ear  
 infection    Ear malformation    Ear pain    Ejaculation disorder  
 Electroencephalogram abnormal    Embolism    Encephalopathy  
 Enuresis    Epilepsy    Erectile dysfunction    Euphoric mood  
 Expressive language disorder    External ear disorder    Eye  
 disorder    Eye pain    Eyelid ptosis    Face oedema    Faecal  
 incontinence    Fatigue    Feeling abnormal    Flat affect    Flatulence  
 Fluid retention    Flushing    Gait disturbance    Gastric disorder  
 Gastroenteritis    Gastrointestinal disorder    Gastrointestinal  
 haemorrhage    Gastrointestinal pain    Gastrooesophageal reflux disease  
 Haemangioma    Haemangioma congenital    Haematochezia    Haematuria  
 Haemoglobin    Haemorrhage    Haemorrhoids    Hallucination  
 Hamartoma    Headache    Hip dysplasia    Hydronephrosis  
 Hyperglycaemia    Hyperhidrosis    Hyperkinesia  
 Hyperreflexia    Hypersensitivity    Hypertension  
 Hyperthermia    Hyperthermia malignant    Hypertonia  
 Hyperventilation    Hypoaesthesia    Hypomania    Hyporeflexia  
 Hypotension    Hypothermia    Hypotonia    Hypoventilation    Hypoxia  
 Ileus    Ill-defined disorder    Incontinence    Increased  
 appetite    Infection    Influenza    Insomnia    Irritability  
 Ischaemia    Joint swelling    Laryngeal oedema    Leiomyoma  
 Lethargy    Leukocytosis    Limb malformation    Limb reduction  
 defect    Loss of consciousness    Low set ears    Maculopathy    Major  
 depression    Malaise    Mania    Memory impairment    Meningitis    Menstrual  
 disorder    Mental disability    Mental disorder    Miosis    Mood swings  
 Muscle relaxant therapy    Muscle spasticity    Muscle twitching  
 Muscular weakness    Musculoskeletal discomfort    Musculoskeletal  
 disorder    Musculoskeletal pain    Musculoskeletal stiffness  
 Myalgia    Mydriasis    Myoclonic epilepsy    Myoclonus    Nasal  
 congestion    Nasopharyngitis    Nausea    Neoplasm malignant  
 Nephrolithiasis    Nervous system disorder    Nervousness  
 Neuritis    Neuropathy peripheral    Nightmare    Nocturia  
 Nuchal rigidity    Nystagmus    Oedema    Oedema peripheral  
 Oesophagitis    Oliguria    Opisthotonus    Optic atrophy  
 Optic neuritis    Organ failure    Oropharyngeal pain  
 Orthostatic hypotension    Osteoarthritis    Otitis media  
 acute    Pain    Pain in extremity    Pallor    Palpitations  
 Paraesthesia    Paranoia    Personality disorder    Petechiae  
 Photophobia    Pneumonia    Pneumonia aspiration    Pollakiuria  
 Postictal state    Pruritus    Psychotic disorder    Puberty  
 Pulmonary congestion    Pulmonary embolism    Pulmonary  
 function test decreased    Purpura    Rash    Rash papular    Renal  
 aplasia    Renal failure    Respiratory depression    Respiratory  
 disorder    Respiratory failure    Respiratory rate decreased  
 Respiratory tract congestion    Respiratory tract infection  
 Retching    Retinal degeneration    Retinitis pigmentosa  
 Rhinitis    Salivary hypersecretion    Scotoma    Sedation  
 Sensory disturbance    Sensory loss    Sexual dysfunction  
 Shock    Sinus headache    Sinusitis    Skin disorder    Skin ulcer  
 Somnolence    Speech disorder    Status epilepticus    Strabismus  
 Stridor    Stupor    Suicide attempt    Supernumerary nipple

Swelling    Syncope    Tachycardia Talipes    Tension  
Thinking abnormal Thirst    Throat irritation Thrombophlebitis  
Thrombosis Tinnitus    Tongue disorder    Tooth disorder  
Toothache    Toxic epidermal necrolysis    Tremor    Ulcer Upper  
respiratory tract infection Urinary incontinence    Urinary retention  
Urinary tract infection    Urticaria    Uterine leiomyoma  
Uterovaginal prolapse Vaginal infection Vaginal inflammation  
Vascular purpura Vasodilation procedure Venous thrombosis  
Ventricular arrhythmia Vertigo    Vesicoureteric reflux    Viral  
diarrhoea    Viral infection    Vision blurred    Visual acuity reduced  
Visual impairment Vomiting    Weight decreased    Weight increased  
Wound dehiscence    Wound secretion

\*\*\*\*\*  
\*\*\*\*\*

ATP-binding cassette transporter sub-family C member 8 - Group:  
Transporter

Treated with:

adenosine triphosphate:    approved, nutraceutical small molecule  
(0 associated side effects) For nutritional supplementation,  
also for treating dietary shortage or imbalance

glimepiride:    approved    small molecule    (59 associated side  
effects)    For concomitant use with insulin for the treatment of  
noninsulin-dependent (type 2) diabetes mellitus.

chlorpropamide: approved    small molecule    (33 associated side  
effects)    For treatment of NIDDM in conjunction with diet and  
exercise.

nateglinide:    approved    small molecule    (32 associated side  
effects)    For the treatment of non-insulin dependent-diabetes  
mellitus in conjunction with diet and exercise.

repaglinide:    approved    small molecule    (51 associated side  
effects)    For the treatment of non-insulin dependent-diabetes  
mellitus in conjunction with diet and exercise.

glyburide: approved    small molecule    (52 associated side effects)  
Indicated as an adjunct to diet to lower the blood glucose in  
patients with NIDDM whose hyperglycemia cannot be satisfactorily  
controlled by diet alone.

glipizide: approved    small molecule    (80 associated side effects)  
For use as an adjunct to diet for the control of hyperglycemia  
and its associated symptomatology in patients with non-insulin-  
dependent diabetes mellitus (NIDDM; type II), formerly known as  
maturity-onset diabetes, after an adequate trial of dietary therapy  
has proved unsatisfactory.

gliclazide: approved    small molecule    (201 associated side  
effects)    For the treatment of NIDDM in conjunction with diet and  
exercise.

tolbutamide:    approved    small molecule    (0 associated side  
effects)    For treatment of NIDDM (non-insulin-dependent diabetes  
mellitus) in conjunction with diet and exercise.

gliquidone: approved    small molecule    (0 associated side effects)  
Used in the treatment of diabetes mellitus type 2.

mitiglinide:    approved    small molecule    (0 associated side  
effects)    For the treatment of type 2 diabetes.

glisoxepide:    approved    small molecule    (0 associated side  
effects)    For the treatment of diabetes mellitus type 2.

glycodiazine: approved small molecule (0 associated side effects) Glycodiazine is used concomitantly with insulin for the treatment of noninsulin-dependent (type 2) diabetes mellitus.

254 known side effects mediated through drugs targeting this protein:

Abdominal discomfort Abdominal distension Abdominal pain  
Abdominal pain upper Acute coronary syndrome  
Agranulocytosis Albuminuria Alopecia Anaemia Anal  
fissure Anaphylactic shock Anaphylactoid reaction Angina  
pectoris Angioedema Anxiety Aplastic anaemia Arrhythmia  
Arterial disorder Arteritis Arthralgia Arthritis Arthropathy  
Asthenia Asthma Back pain Balanoposthitis Benign  
breast neoplasm Benign gastrointestinal neoplasm Bladder pain  
Blindness Blood triglycerides increased Body temperature  
increased Bone pain Breast disorder female Breast neoplasm  
Bronchitis Bursitis Cardiac disorder Cardiac failure  
Cardiac failure congestive Carpal tunnel syndrome Cataract  
Cerebrovascular accident Cerebrovascular disorder Chest  
pain Chills Cholestasis Colitis Coma Confusional state  
Congenital anomaly Conjunctival haemorrhage  
Conjunctivitis Constipation Coronary artery disease  
Cough Crocodile tears syndrome Cystitis Cystitis  
noninfective Deafness Decreased appetite Dermatitis atopic  
Dermatitis exfoliative Developmental delay Diarrhoea  
Diplopia Discomfort Disturbance in sexual arousal  
Dizziness Drug interaction Dry mouth Dry skin Duodenal  
ulcer Dyspepsia Dyspnoea Dysuria Ear infection Eczema  
Electrocardiogram abnormal Eosinophilia Epistaxis  
Erectile dysfunction Erythema Erythema multiforme  
Erythropenia Faecal incontinence Fatigue Feeling  
abnormal Flatulence Fluid retention Flushing Fungal infection  
Fungal skin infection Gait disturbance Gastritis  
Gastroenteritis Gastrointestinal disorder Gastrointestinal  
haemorrhage Gastrointestinal neoplasm Gastrointestinal pain  
Gastrointestinal tract irritation Gastrooesophageal reflux  
disease Glaucoma Glycosuria Gout Haematochezia Haemoglobin  
Haemolytic anaemia Haemorrhage Haemorrhoids Headache  
Hearing impaired Hepatic enzyme increased Hepatic failure  
Hepatic function abnormal Hepatitis Hepatitis cholestatic  
Hepatomegaly Hernia Hernia congenital Hot flush  
Hunger Hypercholesterolaemia Hyperhidrosis  
Hyperkeratosis Hyperlipidaemia Hypersensitivity  
Hypertension Hypertonia Hypertriglyceridaemia  
Hypoaesthesia Hypoglycaemia Hypoglycaemic coma  
Hyponatraemia Hypopituitarism Hypotension Hypothyroidism  
Ill-defined disorder Inappropriate antidiuretic hormone  
secretion Incontinence Increased appetite Infarction  
Infection Influenza Insomnia Ischaemia Jaundice  
Jaundice cholestatic Laboratory test abnormal Lacrimation  
increased Leukocytoclastic vasculitis Leukopenia Libido decreased  
Lipid metabolism disorder Liver disorder Loss of  
consciousness Malaise Malnutrition Mastitis Melaena  
Menopausal symptoms Menstrual disorder Mental disorder  
Metabolic disorder Migraine Muscle spasms

Musculoskeletal discomfort Myalgia Myocardial infarction  
 Myocardial ischaemia Nail disorder Nausea Neoplasm  
 Neoplasm malignant Nephrolithiasis Nephropathy Nervous  
 system disorder Nervousness Neuralgia Neuropathy peripheral  
 Nocturia Normal pressure hydrocephalus Oedema  
 Oedema peripheral Oesophagitis Onychomycosis  
 Osteoarthritis Otitis media Pain Pain in extremity  
 Palpitations Pancreatitis Pancreatitis acute  
 Pancytopenia Paraesthesia Pharyngitis Photosensitivity  
 reaction Pneumonia Pollakiuria Polyuria Porphyria Porphyria  
 non-acute Proctocolitis Prostatic disorder Pruritus  
 Purpura Rash Rash maculo-papular Renal cyst Renal  
 failure Renal failure acute Respiratory tract infection  
 Retinal disorder Retinal haemorrhage Rhinitis Salivary  
 hypersecretion Shock Sinusitis Skin disorder Skin ulcer  
 Somnolence Spine malformation Syncope Tachycardia  
 Tendonitis Tension Thirst Thrombocytopenia  
 Thrombophlebitis Tinnitus Tooth disorder Toothache  
 Tracheitis Tremor Ulcer Upper respiratory tract infection  
 Urinary tract infection Urine output increased Urticaria  
 Vaginal infection Vaginal inflammation Vascular purpura  
 Vasculitis Vasodilation procedure Vein disorder Vertigo  
 Viral infection Vision blurred Visual acuity reduced  
 Visual impairment Vitreous disorder Vomiting Weight increased  
 Xerophthalmia

\*\*\*\*\*  
 \*\*\*\*\*

Folate receptor beta - Group: Receptor

Treated with:

folic acid: approved, nutraceutical small molecule (0 associated  
 side effects) For treatment of folic acid deficiency,  
 megaloblastic anemia and in anemias of nutritional supplements,  
 pregnancy, infancy, or childhood.

known side effects mediated through drugs targeting this protein:

\*\*\*\*\*  
 \*\*\*\*\*

Beta-adrenergic receptor kinase 1 - Group: Enzyme

Treated with:

adenosine triphosphate: approved, nutraceutical small molecule  
 (0 associated side effects) For nutritional supplementation,  
 also for treating dietary shortage or imbalance

known side effects mediated through drugs targeting this protein:

\*\*\*\*\*  
 \*\*\*\*\*

Muscarinic acetylcholine receptor M1 - Group: Receptor

Treated with:

cevimeline: approved small molecule (422 associated side  
 effects) For the treatment of symptoms of dry mouth in patients  
 with Sjögren's Syndrome.

succinylcholine: approved small molecule (27 associated side  
 effects) Used in surgical procedures where a rapid onset and brief

duration of muscle relaxation is needed (includes intubation, endoscopies, and ECT)

trospium: approved small molecule (119 associated side effects) For the treatment of overactive bladder with symptoms of urge urinary incontinence, urgency, and urinary frequency, detrusor instability and frequency of micturition.

oxyphenonium: approved small molecule (0 associated side effects) For the treatment of visceral spasms

benzotropine: approved small molecule (0 associated side effects) For use as an adjunct in the therapy of all forms of parkinsonism and also for use in the control of extrapyramidal disorders due to neuroleptic drugs.

ziprasidone: approved small molecule (251 associated side effects) For the treatment of schizophrenia and related psychotic disorders.

disopyramide: approved small molecule (85 associated side effects) For the treatment of documented ventricular arrhythmias, such as sustained ventricular tachycardia, ventricular pre-excitation and cardiac dysrhythmias. It is a Class Ia antiarrhythmic drug.

amitriptyline: approved small molecule (109 associated side effects) For the treatment of depression, chronic pain, irritable bowel syndrome, sleep disorders, diabetic neuropathy, agitation and insomnia, and migraine prophylaxis.

ipratropium bromide: approved small molecule (116 associated side effects) For maintenance treatment of bronchospasm associated with chronic obstructive pulmonary disease, including chronic bronchitis and emphysema.

olanzapine: approved small molecule (393 associated side effects) For the acute and maintenance treatment of schizophrenia and related psychotic disorders, as well as acute treatment of manic or mixed episodes of bipolar 1 disorder. Intramuscular olanzapine is indicated for the rapid control of agitated patients.

metixene: approved small molecule (0 associated side effects)  
Used for the symptomatic treatment of parkinsonism.

buclizine: approved small molecule (0 associated side effects)  
For prevention and treatment of nausea, vomiting, and dizziness associated with motion sickness and vertigo (dizziness caused by other medical problems).

clozapine: approved small molecule (228 associated side effects) For use in patients with treatment-resistant schizophrenia.

doxylamine: approved small molecule (0 associated side effects)  
Used alone as a short-term sleep aid, in combination with other drugs as a night-time cold and allergy relief drug. Also used in combination with Vitamin B6 (pyridoxine) to prevent morning sickness in pregnant women.

trihexyphenidyl: approved small molecule (43 associated side effects) Indicated for the treatment of parkinson's disease and extrapyramidal reactions caused by drugs.

oxyphencyclimine: approved small molecule (0 associated side effects) For the treatment of peptic ulcer disease and the relief of smooth muscle spasms in gastrointestinal disorders.

procyclidine: approved small molecule (0 associated side effects) For the treatment of all forms of Parkinson's Disease, as



well as control of extrapyramidal reactions induced by antipsychotic agents.

ethopropazine: approved small molecule (0 associated side effects) For use in the treatment of Parkinson's disease and also used to control severe reactions to certain medicines such as reserpine.

carbachol: approved small molecule (12 associated side effects) Primarily used in the treatment of glaucoma, but is also used during ophthalmic surgery.

promazine: approved small molecule (0 associated side effects) Used as an adjunct for short term treatment of moderate and severe psychomotor agitation. Also used to treat agitation or restlessness in the elderly.

hyoscyamine: approved small molecule (0 associated side effects) For treatment of bladder spasms, peptic ulcer disease, diverticulitis, colic, irritable bowel syndrome, cystitis, and pancreatitis. Also used to treat certain heart conditions, to control the symptoms of Parkinson's disease and rhinitis.

cyproheptadine: approved small molecule (63 associated side effects) For treatment of perennial and seasonal allergic rhinitis, vasomotor rhinitis, allergic conjunctivitis due to inhalant allergens and foods, mild uncomplicated allergic skin manifestations of urticaria and angioedema, amelioration of allergic reactions to blood or plasma, cold urticaria, dermatographism, and as therapy for anaphylactic reactions adjunctive to epinephrine.

imipramine: approved small molecule (100 associated side effects) For the relief of symptoms of depression and as temporary adjunctive therapy in reducing enuresis in children aged 6 years and older. May also be used to manage panic disorders, with or without agoraphobia, as a second line agent in ADHD, management of eating disorders, for short-term management of acute depressive episodes in bipolar disorder and schizophrenia, and for symptomatic treatment of postherpetic neuralgia.

methylscopolamine: approved small molecule (29 associated side effects) Used as adjunctive therapy for the treatment of peptic ulcer. Also used to treat nausea and vomiting due to motion sickness.

darifenacin: approved small molecule (69 associated side effects) For the treatment of overactive bladder with symptoms of urge urinary incontinence, urgency and frequency.

tridihexethyl: approved small molecule (0 associated side effects) Used as an adjunct in the treatment of peptic ulcer disease and in Acquired nystagmus

triflupromazine: approved small molecule (0 associated side effects) Used mainly in the management of psychoses. Also used to control nausea and vomiting.

anisotropine methylbromide: approved small molecule (0 associated side effects) For use in conjunction with antacids or histamine H<sub>2</sub>-receptor antagonists in the treatment of peptic ulcer, to reduce further gastric acid secretion and delay gastric emptying.

nortriptyline: approved small molecule (91 associated side effects) For the treatment of depression, chronic pain, irritable bowel syndrome, sleep disorders, diabetic neuropathy, agitation and insomnia, and migraine prophylaxis.

amoxapine: approved small molecule (103 associated side effects) For the relief of symptoms of depression in patients with neurotic or reactive depressive disorders as well as endogenous and psychotic depressions. May also be used to treat depression accompanied by anxiety or agitation.

nicardipine: approved small molecule (107 associated side effects) Used for the management of patients with chronic stable angina and for the treatment of hypertension.

pirenzepine: approved small molecule (0 associated side effects) For the treatment of peptic ulcer, gastric ulcer, and duodenal ulcer.

paroxetine: approved small molecule (505 associated side effects) Labeled indications include: major depressive disorder (MDD), panic disorder with or without agoraphobia, obsessive-compulsive disorder (OCD), social anxiety disorder (social phobia), generalized anxiety disorder (GAD), post-traumatic stress disorder (PTSD), and premenstrual dysphoric disorder (PMDD). Unlabeled indications include: eating disorders, impulse control disorders, vasomotor symptoms of menopause, obsessive-compulsive disorder (OCD) in children, and mild dementia-associated agitation in nonpsychotic individuals.

homatropine methylbromide: approved small molecule (0 associated side effects) Used in conjunction with antacids or histamine H2-receptor antagonists in the treatment of peptic ulcers, gastric ulcers and duodenal ulcers, to reduce further gastric acid secretion and delay gastric emptying.

benzquinamide: approved small molecule (0 associated side effects) Used to prevent and treat nausea and vomiting associated with anesthesia and surgery, administered intramuscularly or intravenously.

clidinium: approved small molecule (0 associated side effects) For the treatment of peptic ulcer disease and also to help relieve abdominal or stomach spasms or cramps due to colicky abdominal pain, diverticulitis, and irritable bowel syndrome.

propiomazine: approved small molecule (0 associated side effects) Propiomazine is largely used for its antihistaminic sleep inducing effects in treating insomnia.

propantheline: approved small molecule (28 associated side effects) For the treatment of enuresis. It has also been used for hyperhidrosis, and cramps or spasms of the stomach, intestines or bladder.

cryptenamine: approved small molecule (0 associated side effects) For the treatment of hypertension.

dicyclomine: approved small molecule (85 associated side effects)

minaprine: approved small molecule (0 associated side effects) For the treatment of depression

tropicamide: approved small molecule (14 associated side effects) Indicated to induce mydriasis (dilation of the pupil) and cycloplegia (paralysis of the ciliary muscle of the eye) in diagnostic procedures, such as measurement of refractive errors and examination of the fundus of the eye.

biperiden: approved small molecule (13 associated side effects) For use as an adjunct in the therapy of all forms of

parkinsonism and control of extrapyramidal disorders secondary to neuroleptic drug therapy.

brompheniramine: approved small molecule (27 associated side effects) For the treatment of the symptoms of the common cold and allergic rhinitis, such as runny nose, itchy eyes, watery eyes, and sneezing.

flupenthixol: approved small molecule (0 associated side effects) For use in the treatment of schizophrenia and depression

cocaine: illicit, approved small molecule (13 associated side effects) For the introduction of local (topical) anesthesia of accessible mucous membranes of the oral, laryngeal and nasal cavities.

maprotiline: approved small molecule (0 associated side effects) For treatment of depression, including the depressed phase of bipolar depression, psychotic depression, and involuntional melancholia, and may also be helpful in treating certain patients suffering severe depressive neurosis.

methantheline: approved small molecule (0 associated side effects) For the treatment of peptic ulcer disease, irritable bowel syndrome, pancreatitis, gastritis, biliary dyskinesia, pylorospasm, and reflex neurogenic bladder in children.

cycrimine: approved small molecule (0 associated side effects) For treatment and management of Parkinson's disease.

cyclopentolate: approved small molecule (27 associated side effects) Used mainly to produce mydriasis and cycloplegia for diagnostic purposes.

glycopyrrolate: approved small molecule (85 associated side effects) For use as a preoperative antimuscarinic to reduce salivary, tracheobronchial, and pharyngeal secretions, to reduce the volume and free acidity of gastric secretions and to block cardiac vagal inhibitory reflexes during induction of anesthesia and intubation.

tolterodine: approved small molecule (51 associated side effects) For the treatment of overactive bladder (with symptoms of urinary frequency, urgency, or urge incontinence).

oxybutynin: approved small molecule (163 associated side effects) For the treatment of overactive bladder.

promethazine: approved small molecule (80 associated side effects) For the treatment of allergic disorders, and nausea/vomiting.

pilocarpine: approved small molecule (207 associated side effects) For the treatment of radiation-induced dry mouth (xerostomia) and symptoms of dry mouth in patients with Sj&ouml;grens syndrome.

doxepin: approved small molecule (210 associated side effects) Labeled indications: depression and insomnia. Unlabeled indications: chronic and neuropathic pain, anxiety, idiopathic urticaria.

flavoxate: approved small molecule (18 associated side effects) For symptomatic relief of dysuria, urgency, nocturia, suprapubic pain, frequency and incontinence as may occur in cystitis, prostatitis, urethritis, urethrocystitis/urethrotrigonitis.

desipramine: approved small molecule (120 associated side effects) For relief of symptoms in various depressive syndromes,

especially endogenous depression. It has also been used to manage chronic peripheral neuropathic pain, as a second line agent for the management of anxiety disorders (e.g. panic disorder, generalized anxiety disorder), and as a second or third line agent in the ADHD management.

escitalopram: approved small molecule (0 associated side effects) Labeled indications include major depressive disorder (MDD) and generalized anxiety disorder (GAD). Unlabeled indications include treatment of mild dementia-associated agitation in nonpsychotic patients.

quetiapine: approved small molecule (359 associated side effects) For the treatment of schizophrenia and related psychotic disorders.

diphenidol: approved small molecule (0 associated side effects)

For use in the prevention and symptomatic treatment of peripheral (labyrinthine) vertigo and associated nausea and vomiting that occur in such conditions as Meniere's disease and surgery of the middle and inner ear. Also for the control of nausea and vomiting associated with postoperative states, malignant neoplasms, labyrinthine disturbances, antineoplastic agent therapy, radiation sickness, and infectious diseases.

metoclopramide: approved small molecule (75 associated side effects) For the treatment of gastroesophageal reflux disease (GERD). It is also used in treating nausea and vomiting, and to increase gastric emptying.

aripiprazole: approved small molecule (630 associated side effects) For the treatment of schizophrenia and related psychotic disorders.

chlorprothixene: approved small molecule (0 associated side effects) For treatment of psychotic disorders (e.g. schizophrenia) and of acute mania occurring as part of bipolar disorders.

methotrimeprazine: approved small molecule (0 associated side effects) For the treatment of psychosis, particular those of schizophrenia, and manic phases of bipolar disorder.

tiotropium: approved small molecule (60 associated side effects) Used in the management of chronic obstructive pulmonary disease (COPD).

solifenacin: approved small molecule (56 associated side effects) For the treatment of overactive bladder with symptoms of urge urinary incontinence, urgency, and urinary frequency.

molindone: approved small molecule (46 associated side effects) Molindone is used for the management of the manifestations of psychotic disorders.

arecoline: experimental small molecule (0 associated side effects)

mepenzolate: approved small molecule (30 associated side effects)

fesoterodine: approved small molecule (50 associated side effects) For the treatment of overactive bladder (with symptoms of urinary frequency, urgency, or urge incontinence).

1156 known side effects mediated through drugs targeting this protein:

Abasia      Abdominal discomfort      Abdominal distension      Abdominal pain  
Abdominal pain lower      Abdominal pain upper      Abdominal

tenderness Abnormal behaviour Abnormal dreams Abnormal faeces  
Abscess Accommodation disorder Acidosis Acne Acute  
coronary syndrome Acute psychosis Adenocarcinoma Adjustment  
disorder Affect lability Ageusia Aggression Agitation  
Agoraphobia Agranulocytosis Akathisia Akinesia Alanine  
aminotransferase increased Albuminuria Alcohol abuse Alcohol  
intolerance Alkalosis Alopecia Altered state of consciousness  
Alveolitis allergic Amblyopia Amenorrhoea Amnesia  
Anaemia Anaemia macrocytic Anaphylactic shock  
Anaphylactoid reaction Anger Angina pectoris Angioedema  
Angiopathy Angle closure glaucoma Anhidrosis Anisocytosis  
Anorectal discomfort Anorectal disorder Anorgasmia  
Antinuclear antibody positive Antisocial behaviour  
Antisocial personality disorder Anxiety Aortic dissection  
Apathy Aphasia Aphthous stomatitis Aplasia  
Aplastic anaemia Apnoea Appendicitis Application site  
reaction Arrhythmia Arrhythmia supraventricular Arterial disorder  
Arteriosclerosis Arteritis Arthralgia Arthritis Arthropathy  
Asocial behaviour Aspartate aminotransferase increased  
Asphyxia Aspiration Assisted fertilisation Asthenia  
Asthma Ataxia Atelectasis Athetosis Atrial  
fibrillation Atrial flutter Atrioventricular block first  
degree Atrioventricular dissociation Atrophic  
vulvovaginitis Atrophy Autonomic nervous system imbalance  
Azoospermia Azotaemia Back pain Bacterial infection  
Balance disorder Basal cell carcinoma Basophilia Benign  
prostatic hyperplasia Bladder dilatation Bladder discomfort  
Bladder neck obstruction Bladder pain Bleeding time  
prolonged Blepharitis Blepharospasm Blindness Blister Blood  
alkaline phosphatase increased Blood amylase increased Blood  
bilirubin increased Blood cholesterol increased Blood creatine  
phosphokinase increased Blood creatinine increased Blood  
disorder Blood electrolytes abnormal Blood glucose decreased  
Blood glucose increased Blood insulin increased Blood  
lactate dehydrogenase increased Blood potassium decreased Blood  
potassium increased Blood pressure abnormal Blood pressure  
diastolic decreased Blood pressure fluctuation Blood pressure  
increased Blood pressure systolic decreased Blood prolactin  
increased Blood triglycerides increased Blood triglycerides  
normal Blood urea increased Blood uric acid increased Blood  
urine Blood urine present Blunted affect Body temperature  
decreased Body temperature increased Bone disorder Bone pain  
Bradycardia Bradykinesia Bradyphrenia Brain oedema  
Breast atrophy Breast cancer Breast cyst Breast disorder  
female Breast enlargement Breast feeding Breast neoplasm  
Breast pain Breath odour Bronchitis Bronchopneumopathy  
Bronchospasm Bronchospasm paradoxical Bruxism  
Buccoglossal syndrome Bulimia nervosa Bundle branch block  
Burning sensation Bursitis Cachexia Calculus urinary  
Candidiasis Carbohydrate tolerance decreased Cardiac arrest  
Cardiac disorder Cardiac failure Cardiac failure congestive  
Cardiac fibrillation Cardiac flutter Cardiac murmur  
Cardiac output decreased Cardio-respiratory arrest  
Cardiomegaly Cardiomyopathy Cardiopulmonary failure  
Cardiovascular disorder Carpal tunnel syndrome Cataplexy

Cataract    Catatonia    Cells in urine    Cellulitis    Cerebellar  
 syndrome    Cerebral haemorrhage    Cerebral infarction    Cerebral  
 ischaemia    Cerebrovascular accident    Cerebrovascular disorder  
           Cervicitis    Cervix disorder    Change of bowel habit    Chapped  
 lips    Cheilitis    Chest discomfort    Chest pain    Chills    Choking  
           Cholecystitis    Cholelithiasis    Cholestasis    Cholinergic  
 syndrome    Chondropathy    Chorea    Choreoathetosis    Chronic  
 lymphocytic leukaemia    Chronic obstructive pulmonary disease  
           Ciliary muscle spasm    Clonus    Coccydynia    Cognitive  
 disorder    Cogwheel rigidity    Cold sweat    Colitis    Colitis  
 ulcerative    Colonic obstruction    Coma    Completed suicide    Condition  
 aggravated    Conduction disorder    Confusional state    Congenital eye  
 disorder    Conjunctival disorder    Conjunctival hyperaemia  
           Conjunctival oedema    Conjunctivitis    Connective tissue  
 disorder    Constipation    Conversion disorder    Convulsion  
           Coordination abnormal    Corneal degeneration    Corneal lesion  
           Corneal oedema    Corneal opacity    Coronary artery disease  
           Costochondritis    Cough    Crying    Cyanosis    Cycloplegia  
           Cystitis    Cystitis noninfective    Deafness    Death    Decreased  
 appetite    Decubitus ulcer    Deep vein thrombosis    Deficiency  
 anaemia    Dehydration    Delirium    Delusion    Dementia    Dental  
 caries    Dependence    Depersonalisation    Depressed level of  
 consciousness    Depression    Depression suicidal    Depressive  
 symptom    Derealisation    Dermal cyst    Dermatitis    Dermatitis atopic  
           Dermatitis bullous    Dermatitis contact    Dermatitis  
 exfoliative    Diabetes mellitus    Diabetic coma    Diabetic  
 hyperglycaemic coma    Diabetic hyperosmolar coma    Diabetic  
 ketoacidosis    Diarrhoea    Diarrhoea haemorrhagic    Diplopia  
           Discomfort    Disease progression    Disorientation  
           Dissociation    Disturbance in attention    Disturbance in  
 sexual arousal    Diverticulitis    Dizziness    Dizziness exertional  
           Dizziness postural    Drooling    Drug abuse    Drug dependence  
           Drug eruption    Drug hypersensitivity    Drug ineffective    Drug  
 interaction    Drug withdrawal syndrome    Dry eye    Dry mouth    Dry  
 skin    Dry throat    Duodenal ulcer    Duodenitis    Dysaesthesia  
           Dysarthria    Dysgeusia    Dyskinesia    Dysmenorrhoea    Dyspepsia  
           Dysphagia    Dysphemia    Dysphonia    Dysphoria    Dyspnoea  
           Dystonia    Dysuria    Ear disorder    Ear infection    Ear  
 pain    Ecchymosis    Eclampsia    Eczema    Effusion    Ejaculation  
 delayed    Ejaculation disorder    Elastosis perforans    Elderly  
           Electrocardiogram QRS complex    Electrocardiogram QT  
 prolonged    Electrocardiogram ST segment    Electrocardiogram ST segment  
 depression    Electrocardiogram ST segment elevation    Electrocardiogram  
 T wave inversion    Electrocardiogram abnormal    Electrocardiogram  
 change    Electroencephalogram abnormal    Electrolyte imbalance  
           Elevated mood    Embolism    Emphysema    Encephalopathy  
           Endocrine disorder    Endometrial disorder    Energy increased  
           Enteritis    Enterocolitis    Enuresis    Eosinophilia  
           Epididymitis    Epilepsy    Epistaxis    Erectile dysfunction  
           Eructation    Erythema    Erythema multiforme    Erythema nodosum  
           Euphoric mood    Exfoliative rash    Exophthalmos    Exostosis  
           Extensor plantar response    Extrapyrarnidal disorder  
           Extrasystoles    Extravasation    Eye discharge    Eye  
 disorder    Eye haemorrhage    Eye infection    Eye inflammation    Eye  
 irritation    Eye pain    Eyelid disorder    Eyelid function disorder

Eyelid oedema      Eyelid ptosis      Face oedema Facial pain  
 Facial paresis      Faecal incontinence      Faecalith      Faecaloma  
 Faeces hard Failure to thrive Fasciitis      Fasting      Fatigue  
 Fear      Feeling abnormal      Feeling cold      Feeling hot Feeling  
 jittery      Female sexual dysfunction      Fibrocystic breast disease  
 Fibrosis      Flank pain Flat affect Flatulence      Fluid retention  
 Flushing      Folliculitis      Food interaction Formication  
 Fungal infection Fungal skin infection      Furuncle      Gait  
 disturbance Galactorrhoea      Gamma-glutamyltransferase increased  
 Gangrene      Gastric disorder      Gastric pH decreased      Gastric  
 ulcer Gastric ulcer haemorrhage      Gastritis      Gastroenteritis  
 Gastrointestinal disorder      Gastrointestinal haemorrhage  
 Gastrointestinal motility disorder Gastrointestinal pain  
 Gastrointestinal sounds abnormal      Gastrooesophageal reflux  
 disease      Generalised oedema      Genital candidiasis      Genital  
 discharge      Genital disorder female      Genital disorder male  
 Gigantism      Gingival bleeding Gingival hyperplasia      Gingival  
 pain      Gingival recession      Gingivitis      Glaucoma      Globulins  
 increased      Glomerulonephritis membranous      Glossitis      Glossodynia  
 Glucose tolerance decreased      Glucose tolerance impaired  
 Glycosuria      Glycosylated haemoglobin increased Goitre      Gout  
 Grand mal convulsion      Grimacing      Groin pain      Gynaecomastia  
 Haematemesis      Haematochezia      Haematocrit decreased  
 Haematoma      Haematuria      Haemoglobin decreased      Haemoglobin  
 increased      Haemoglobinaemia      Haemoglobinuria      Haemolysis      Haemolytic  
 anaemia      Haemoptysis      Haemorrhage      Haemorrhage intracranial  
 Haemorrhagic disorder      Haemorrhoids      Hair disorder      Hair  
 growth abnormal      Hallucination      Hallucination, auditory  
 Hallucination, visual      Halo vision Hangover      Head and neck  
 cancer      Head discomfort      Headache      Hearing impaired      Heart  
 disease congenital      Heart rate irregular      Hemiparesis      Hemiplegia  
 Hepatic enzyme increased      Hepatic failure      Hepatic function  
 abnormal      Hepatic necrosis      Hepatic steatosis      Hepatitis      Hepatitis  
 viral      Hepatobiliary disease      Hepatomegaly      Hepatosplenomegaly  
 Hernia      Herpes simplex      Herpes virus infection      Herpes  
 zoster      Hiccups      Hirsutism      Homicidal ideation      Hormone  
 level abnormal      Hostility      Hot flush      Hyperacusis      Hyperaemia  
 Hyperaesthesia      Hyperbilirubinaemia      Hypercalcaemia  
 Hyperchloraemia      Hyperchlorhydria      Hypercholesterolaemia  
 Hyperglycaemia      Hyperhidrosis      Hyperinsulinism  
 Hyperkalaemia      Hyperkeratosis      Hyperkinesia  
 Hyperlipidaemia      Hypermagnesaemia      Hypernatraemia  
 Hyperparathyroidism      Hyperpathia      Hyperphosphataemia  
 Hyperplasia      Hyperprolactinaemia      Hyperproteinaemia  
 Hyperpyrexia      Hyperreflexia      Hypersensitivity      Hypersomnia  
 Hypertension      Hypertensive crisis      Hyperthermia  
 Hyperthermia malignant      Hyperthyroidism      Hypertonia      Hypertonic  
 bladder      Hypertriglyceridaemia      Hypertrophy      Hyperuricaemia  
 Hyperventilation      Hyphaema      Hypoaesthesia      Hypoaesthesia  
 oral      Hypocalcaemia      Hypochloraemia      Hypocholesterolaemia  
 Hypochromic anaemia      Hypoglycaemia      Hypohidrosis  
 Hypokalaemia      Hypokinesia      Hypomagnesaemia      Hypomania  
 Hypomenorrhoea      Hyponatraemia      Hypophagia      Hypophosphataemia  
 Hypoproteinaemia      Hyporeflexia      Hypotension      Hypothermia  
 Hypothyroidism      Hypotonia      Hypoventilation      Hypoxia

Idiopathic thrombocytopenic purpura      Ileitis      Ileus Ileus  
 paralytic Ill-defined disorder      Illusion      Immobile      Immune  
 system disorder      Immunoglobulins increased      Impaired gastric  
 emptying      Impulse-control disorder      Inappropriate antidiuretic  
 hormone secretion      Incoherent      Incontinence      Increased appetite  
     Increased bronchial secretion      Induration      Infarction  
     Infection      Infertility female      Infestation      Inflammation  
     Influenza      Influenza like illness      Inguinal hernia      Injection  
 site mass      Injection site pain      Injection site phlebitis  
     Injection site reaction      Insomnia      Intention tremor  
     Intentional self-injury      Interstitial lung disease  
     Intestinal functional disorder      Intestinal obstruction  
     Intestinal perforation      Intraocular pressure increased      Iris  
 adhesions      Iritis      Iron deficiency      Iron deficiency anaemia  
     Irritability      Irritable bowel syndrome      Ischaemia  
     Ischaemic stroke      Jaundice      Jaundice cholestatic      Joint  
 contracture      Joint range of motion decreased      Joint stiffness      Joint  
 swelling      Judgement impaired      Keratitis      Keratoconjunctivitis  
 sicca      Keratopathy      Ketoacidosis      Ketosis      Laboratory test  
 abnormal      Labyrinthitis      Lacrimal disorder      Lacrimation decreased  
     Lacrimation increased      Laryngeal disorder      Laryngeal oedema  
     Laryngitis      Laryngospasm      Left ventricular failure  
     Leiomyoma      Lens disorder      Lenticular opacities      Lenticular  
 pigmentation      Lethargy      Leukaemia      Leukocytosis      Leukoderma  
     Leukopenia      Leukoplakia oral      Libido decreased      Libido increased  
     Lichen planus      Lichenoid keratosis      Lip blister      Lip dry  
     Liver disorder      Liver function test abnormal      Logorrhoea      Loss  
 of consciousness      Loss of libido      Lower respiratory tract infection  
     Lung adenocarcinoma stage I      Lung disorder      Lymphadenitis  
     Lymphadenopathy      Lymphocyte count abnormal      Lymphocytic  
 leukaemia      Lymphocytosis      Lymphoedema      Lymphopenia      Macular hole  
     Macule      Maculopathy      Major depression      Malaise      Male sexual  
 dysfunction      Malignant melanoma      Mania      Masked facies      Mass  
     Mastitis      Mediastinal disorder      Megacolon      Melaena  
     Memory impairment      Meningitis      Menopausal symptoms      Menorrhagia  
     Menstrual disorder      Menstruation irregular      Mental disability  
     Mental disorder      Mental retardation      Mental status changes  
     Methaemoglobinaemia      Metrorrhagia      Microcytic anaemia  
     Micturition disorder      Micturition urgency      Middle ear  
 disorder      Migraine      Miosis      Mitral valve incompetence  
     Moaning      Mobility decreased      Monocytosis      Mood swings  
     Motion sickness      Mouth haemorrhage      Mouth ulceration      Movement  
 disorder      Mucosal inflammation      Mucosal ulceration      Mucous  
 membrane disorder      Multiple hereditary exostosis      Multiple  
 sclerosis      Muscle contractions involuntary      Muscle contracture  
     Muscle enzyme increased      Muscle relaxant therapy  
     Muscle rigidity      Muscle spasms      Muscle tightness      Muscle  
 twitching      Muscular weakness      Musculoskeletal chest pain  
     Musculoskeletal discomfort      Musculoskeletal disorder  
     Musculoskeletal pain      Musculoskeletal stiffness      Myalgia  
     Myasthenic syndrome      Mydriasis      Myelitis      Myocardial  
 infarction      Myocardial ischaemia      Myocarditis      Myoclonus      Myopathy  
     Myopia      Myositis      Nail discolouration      Nail disorder  
     Nasal congestion      Nasal discomfort      Nasal disorder      Nasal  
 dryness      Nasal oedema      Nasal polyps      Nasal ulcer



Nasopharyngitis Nausea Neck pain Necrosis Necrosis  
 ischaemic Negativism Neoplasm Neoplasm malignant Nephritis  
 Nephrolithiasis Nephrotic syndrome Nervous system  
 disorder Nervousness Neuralgia Neuritis Neurodermatitis  
 Neuroleptic malignant syndrome Neurological symptom  
 Neuropathy peripheral Neurosis Neutropenia Neutrophil count  
 decreased Neutrophil count increased Night blindness Night  
 sweats Nightmare Nocturia Nodal arrhythmia Nodal rhythm  
 Normochromic normocytic anaemia Nuchal rigidity Nystagmus  
 Obesity Obsessive thoughts Obstruction Obstructive  
 airways disorder Ocular hyperaemia Oculogyric crisis Oedema mouth  
 Oedema peripheral Oesophageal achalasia Oesophageal disorder  
 Oesophageal stenosis Oesophageal ulcer Oesophagitis  
 Oliguria Onychomycosis Open angle glaucoma Operative  
 haemorrhage Opisthotonus Optic neuritis Oral candidiasis Oral  
 disorder Oral pain Orchitis noninfective Orgasm abnormal  
 Oropharyngeal discomfort Oropharyngeal pain  
 Oropharyngeal spasm Orthostatic hypotension  
 Osteoarthritis Osteoarthropathy Osteomyelitis  
 Osteonecrosis Osteopenia Osteoporosis Otitis externa  
 Otitis media Ovarian cyst Ovarian disorder Pain Pain  
 in extremity Pain in jaw Pallor Palpitations  
 Pancreatitis Pancreatitis acute Pancytopenia Panic  
 attack Panic disorder Panic disorder with agoraphobia Panic  
 reaction Papule Paraesthesia Paraesthesia oral Paralysis  
 Paranoia Parity Parkinsonian gait Paronychia Parosmia  
 Parotid gland enlargement Parotitis Pathological fracture  
 Pelvic pain Peptic ulcer Pericardial effusion Pericardial  
 haemorrhage Pericarditis Periodontitis Periorbital oedema  
 Peripheral ischaemia Peripheral vascular disorder Peritonitis  
 Personality disorder Petechiae Pharyngeal disorder  
 Pharyngeal erythema Pharyngeal oedema Pharyngitis Phlebitis  
 Phlebitis superficial Phobia Phonological disorder  
 Photophobia Photopsia Photosensitivity reaction  
 Pigmentation disorder Plantar fasciitis Platelet count  
 decreased Platelet disorder Pleural disorder Pleural effusion  
 Pleurisy Pneumonia Pneumonia aspiration Poisoning  
 Pollakiuria Polycythaemia Polydipsia Polyp Polyuria  
 Porphyria Post procedural haemorrhage Postpartum disorder  
 Pregnancy Premature baby Premature delivery Premature  
 ejaculation Premenstrual syndrome Pressure of speech Presyncope  
 Priapism Proctalgia Productive cough Prostate cancer  
 Prostatic disorder Prostatitis Protein urine present  
 Proteinuria Protrusion tongue Pruritus Pruritus genital  
 Psoriasis Psychiatric symptom Psychomotor retardation  
 Psychotic disorder Pulmonary congestion Pulmonary  
 embolism Pulmonary fibrosis Pulmonary function test decreased  
 Pulmonary hypertension Pulmonary oedema Punctate keratitis  
 Pupils unequal Purpura Pyelonephritis Pyuria Rales  
 Rash erythematous Rash generalised Rash macular Rash  
 maculo-papular Rash morbilliform Rash papular Rash pustular  
 Rash scarlatiniform Rash vesicular Rectal haemorrhage  
 Rectal tenesmus Red blood cell abnormality Red blood cell  
 count decreased Red blood cell sedimentation rate increased  
 Reflux oesophagitis Regressive behaviour Renal failure

acute Renal impairment Renal pain Reproductive tract disorder  
Respiratory alkalosis Respiratory arrest Respiratory  
depression Respiratory disorder Respiratory distress Respiratory  
failure Respiratory tract congestion Respiratory tract infection  
Respiratory tract infection viral Restless legs syndrome  
Retching Retinal deposits Retinal detachment Retinal  
disorder Retinal haemorrhage Retinitis pigmentosa  
Rhabdomyolysis Rheumatoid arthritis Rhinitis Rhinitis  
allergic Rhinitis seasonal Rhinorrhoea Rhonchi Rosacea  
Salivary gland enlargement Salivary gland pain Salivary  
hypersecretion Salpingitis Sarcosinaemia Scab Schizoaffective  
disorder Schizophreniform disorder Sciatica Scleritis  
Scleroderma Scotoma Seasonal allergy Seborrhoeic dermatitis  
Sedation Sensation of heaviness Sensitisation Sensory  
loss Sepsis Septic shock Sexual dysfunction Shock  
Sialoadenitis Sicca syndrome Sinus arrest Sinus  
arrhythmia Sinus bradycardia Sinus congestion Sinus disorder Sinus  
headache Sinus tachycardia Sinusitis Skin discolouration Skin  
disorder Skin exfoliation Skin hypertrophy Skin irritation Skin  
odour abnormal Skin papilloma Skin ulcer Skin warm Sleep  
apnoea syndrome Sleep disorder Sleep paralysis Sleep talking  
Sluggishness Sneezing Social avoidant behaviour  
Somnambulism Somnolence Speech disorder Sputum increased  
Squamous cell carcinoma Status asthmaticus Status  
epilepticus Stevens-Johnson syndrome Sticky skin Stomatitis  
Strabismus Strangury Stridor Stupor Subarachnoid  
haemorrhage Subdural haematoma Sudden death Suicidal ideation  
Suicide attempt Sulphaemoglobinaemia Suppressed lactation  
Supraventricular extrasystoles Supraventricular tachycardia  
Surgery Suspiciousness Swelling Swelling face  
Swollen tongue Syncope Synovitis Systemic lupus  
erythematosus Tachyarrhythmia Tachycardia Tachypnoea Tardive  
dyskinesia Tearfulness Temperature intolerance Tenderness  
Tendon disorder Tendonitis Tenosynovitis Tension  
Tension headache Teratogenicity Testicular disorder  
Testicular pain Testicular swelling Tetanus Tetany  
Thinking abnormal Thirst Thought blocking Throat irritation  
Throat tightness Thrombocytopenia Thrombocytopenic purpura  
Thrombocytosis Thrombophlebitis Thrombosis Thyroiditis Tic  
Tinnitus Tongue coated Tongue discolouration Tongue  
disorder Tongue dry Tongue geographic Tongue oedema Tongue  
paralysis Tongue spasm Tongue ulceration Tonsillar hypertrophy  
Tooth abscess Tooth disorder Tooth impacted Tooth  
infection Tooth malformation Toothache Torsade de pointes  
Torticollis Toxic epidermal necrolysis Tracheal disorder  
Tracheostomy infection Transaminases increased Transient  
ischaemic attack Tremor Trismus Tuberculin test positive  
Tubulointerstitial nephritis Type I hypersensitivity Ulcer  
haemorrhage Ulcerative keratitis Unintended pregnancy Upper  
respiratory tract infection Urethral disorder Urethral pain  
Urethritis Urinary hesitation Urinary incontinence  
Urinary retention Urinary tract disorder Urinary tract  
infection Urine abnormality Urine analysis abnormal Urine flow  
decreased Urine odour abnormal Urine output increased Urogenital  
disorder Urosepsis Urticaria Uterine disorder Uterine

haemorrhage Uterine leiomyoma Uterine neoplasm Uterine spasm  
Uterovaginal prolapse VIIth nerve paralysis Vaginal discharge  
Vaginal haemorrhage Vaginal infection Vaginal inflammation  
Varicose vein Vascular headache Vascular purpura Vasculitis  
Vasoconstriction Vasodilation procedure Venous thrombosis  
Ventricular arrhythmia Ventricular extrasystoles Ventricular  
failure Ventricular fibrillation Ventricular flutter  
Ventricular tachycardia Vertigo Viral diarrhoea Viral  
infection Vision blurred Visual acuity reduced Visual impairment  
Vitreous detachment Vomiting Vulvovaginal candidiasis  
Vulvovaginal mycotic infection Vulvovaginal pain  
Vulvovaginal pruritus Vulvovaginitis Water intoxication  
Weight decreased Weight fluctuation Weight increased  
Wheezing White blood cell count decreased White blood cell  
count increased White blood cell disorder White blood cells  
urine positive Withdrawal syndrome Xerophthalmia Xerosis  
Yawning

\*\*\*\*\*  
\*\*\*\*\*

Glutamate receptor 4 - Group: Channel

Treated with:

l-glutamic acid: approved, nutraceutical small molecule (0  
associated side effects) Considered to be nature's "Brain food"  
by improving mental capacities; helps speed the healing of ulcers;  
gives a "lift" from fatigue; helps control alcoholism, schizophrenia  
and the craving for sugar.

known side effects mediated through drugs targeting this protein:

\*\*\*\*\*  
\*\*\*\*\*

Non-receptor tyrosine-protein kinase TYK2 - Group: Enzyme

Treated with:

2-(1,1-dimethylethyl)9-fluoro-3,6-dihydro-7h-benz[h]-imidaz[4,5-  
f]isoquinolin-7-one: experimental small molecule (0  
associated side effects)  
3-{(3r,4r)-4-methyl-3-[methyl(7h-pyrrolo[2,3-d]pyrimidin-4-  
yl)amino]piperidin-1-yl}-3-oxopropanenitrile: experimental small  
molecule (0 associated side effects)

known side effects mediated through drugs targeting this protein:

\*\*\*\*\*  
\*\*\*\*\*

Glucocorticoid receptor - Group: Receptor

Treated with:

flunisolide: approved small molecule (116 associated side  
effects) For the maintenance treatment of asthma as a prophylactic  
therapy.  
diflorasone: approved small molecule (0 associated side  
effects) For relief of the inflammatory and pruritic  
manifestations of corticosteroid responsive dermatoses.  
alclometasone: approved small molecule (13 associated side  
effects) For the relief of the inflammatory and pruritic  
manifestations of corticosteroid-responsive dermatoses.

medrysone: approved small molecule (26 associated side effects)

For the treatment of allergic conjunctivitis, vernal conjunctivitis, episcleritis, and epinephrine sensitivity.

amcinonide: approved small molecule (24 associated side effects)

For the relief of the inflammatory and pruritic manifestations of corticosteroid-responsive dermatoses.

fluorometholone: approved small molecule (27 associated side effects) For the ophthalmic treatment of corticosteroid-responsive inflammation of the palpebral and bulbar conjunctiva, cornea and anterior segment of the globe.

megestrol: approved small molecule (97 associated side effects)

For the treatment of anorexia, cachexia, or an unexplained, significant weight loss in patients with a diagnosis of acquired immunodeficiency syndrome (AIDS). Also used for the palliative management of recurrent, inoperable, or metastatic breast cancer, endometrial cancer, and prostate cancer in Canada and some other countries.

beclometasone dipropionate: approved small molecule (0 associated side effects) For the maintenance treatment of asthma as prophylactic therapy in patients 5 years of age and older. Also being investigated for oral treatment in mild-to-moderate Crohn's disease of ileal or ileal-right colonic localisation and for "topical" use mild-to-moderate graft versus host disease.

betamethasone: approved small molecule (0 associated side effects) <b>Topical use (cream, lotion and ointment):</b> for relief of the inflammatory and pruritic manifestations of corticosteroid-responsive dermatoses<br/><b>Topical use (foam):</b> relief of the inflammatory and pruritic manifestations of corticosteroid-responsive dermatoses of the scalp<br/><b>Systemic use:</b> for the treatment of endocrine disorders, rheumatic disorders, collagen diseases, dermatological diseases, allergic states, ophthalmic diseases, respiratory diseases, hematologic disorders, neoplastic diseases, edematous states, gastrointestinal diseases, tuberculous meningitis and trichinosis.

desoximetasone: approved small molecule (26 associated side effects) For the relief of the inflammatory and pruritic manifestations of corticosteroid-responsive dermatoses.

fluticasone propionate: approved small molecule (0 associated side effects) For the maintenance treatment of asthma as prophylactic therapy and for patients requiring oral corticosteroid therapy for asthma.

fluocinolone acetonide: approved small molecule (131 associated side effects) For the relief of the inflammatory and pruritic manifestations of corticosteroid-responsive dermatoses. Also for the treatment of chronic non-infectious uveitis affecting the posterior segment of the eye (Retisert).

halobetasol propionate: approved small molecule (0 associated side effects) For the relief of the inflammatory and pruritic manifestations of corticosteroid-responsive dermatoses.

triamcinolone: approved small molecule (235 associated side effects) For the treatment of perennial and seasonal allergic rhinitis.

prednisone: approved small molecule (162 associated side effects) For the treatment of drug-induced allergic reactions,

perennial or seasonal allergic rhinitis, serum sickness, giant cell arteritis acute rheumatic or nonrheumatic carditis, systemic dermatomyositis, systemic lupus erythematosus, atopic dermatitis, contact dermatitis, exfoliative dermatitis, bullous dermatitis herpetiformis, severe seborrheic dermatitis, severe (Stevens-Johnson syndrome) erythema multiforme, mycosis fungoides, pemphigus, severe psoriasis, acute adrenocortical insufficiency, Addison's disease, secondary adrenocortical insufficiency, congenital adrenal hyperplasia, hypercalcemia associated with neoplasms, nonsuppurative thyroiditis, ulcerative colitis, Crohn's disease, acquired hemolytic anemia, congenital hypoplastic anemia, erythroblastopenia, adult secondary thrombocytopenia, adult idiopathic thrombocytopenia purpura, acute or subacute bursitis, epicondylitis, acute nonspecific tenosynovitis, acute or chronic lymphocytic leukemia, Hodgkin's or non-Hodgkin's lymphomas, Waldenstrom's macroglobulinemia, primary brain tumors (adjunct), nephrotic syndrome, tuberculous meningitis, multiple sclerosis, myasthenia gravis. cerebral edema, chorioretinitis, diffuse posterior choroiditis, allergic conjunctivitis, Herpes zoster ophthalmicus, anterior segment inflammation, iridocyclitis, iritis, keratitis, optic neuritis, sympathetic ophthalmia, corneal marginal allergic ulcers, symptomatic sarcoidosis, Loeffler's syndrome not manageable by other means, berylliosis, fulminating or disseminated pulmonary tuberculosis when used concurrently with appropriate antituberculous chemotherapy and aspiration pneumonitis.

flumethasone pivalate: approved small molecule (0 associated side effects) For the treatment of contact dermatitis, atopic dermatitis, exczema, psoriasis, diaper rash and other skin conditions

fludrocortisone: approved small molecule (81 associated side effects) For partial replacement therapy for primary and secondary adrenocortical insufficiency in Addison's disease and for the treatment of salt-losing adrenogenital syndrome.

hydrocortisone: approved small molecule (0 associated side effects) For the relief of the inflammatory and pruritic manifestations of corticosteroid-responsive dermatoses. Also used to treat endocrine (hormonal) disorders (adrenal insufficiency, Addison's disease). It is also used to treat many immune and allergic disorders, such as arthritis, lupus, severe psoriasis, severe asthma, ulcerative colitis, and Crohn's disease.

mometasone: approved small molecule (97 associated side effects)

The inhaler is indicated for the maintenance treatment of asthma as prophylactic therapy. The nasal spray is indicated for the treatment of the nasal symptoms of seasonal allergic and perennial allergic rhinitis.

hydrocortamate: approved small molecule (0 associated side effects) Used topically as an antiinflammatory in the treatment of steroid-responsive dermatoses

mifepristone: approved small molecule (50 associated side effects) For the medical termination of intrauterine pregnancy through 49 days' pregnancy. Also indicated to control hyperglycemia secondary to hypercortisolism in adult patients with endogenous Cushing's syndrome who have type 2 diabetes mellitus or glucose intolerance.

clocortolone: approved small molecule (12 associated side effects) For short-term topical treatment of the inflammatory and pruritic manifestations of moderate to severe corticosteroid-responsive dermatoses of the scalp.

flurandrenolide: approved small molecule (0 associated side effects) For relief of the inflammatory and pruritic manifestations of corticosteroid-responsive dermatoses, particularly dry, scaling localized lesions

prednisolone: approved small molecule (127 associated side effects) For the treatment of primary or secondary adrenocortical insufficiency, such as congenital adrenal hyperplasia, thyroiditis. Also used to treat psoriatic arthritis, rheumatoid arthritis, ankylosing spondylitis, bursitis, acute gouty arthritis and epicondylitis. Also indicated for treatment of systemic lupus erythematosus, pemphigus and acute rheumatic carditis. Can be used in the treatment of leukemias, lymphomas, thrombocytopenia purpura and autoimmune hemolytic anemia. Can be used to treat celiac disease, insulin resistance, ulcerative colitis and liver disorders.

loteprednol: approved small molecule (25 associated side effects) As an ophthalmic it is used for the treatment of steroid responsive inflammatory conditions of the eye such as allergic conjunctivitis, uveitis, acne rosacea, superficial punctate keratitis, herpes zoster keratitis, iritis, cyclitis, and selected infective conjunctivitides. As a nasal spray, used for the treatment and management of seasonal allergic rhinitis.

rimexolone: approved small molecule (32 associated side effects) For the treatment of postoperative inflammation following ocular surgery and in the treatment of anterior uveitis.

methylprednisolone: approved small molecule (138 associated side effects) Adjunctive therapy for short-term administration in rheumatoid arthritis.

clobetasol: approved small molecule (67 associated side effects) For short-term topical treatment of the inflammatory and pruritic manifestations of moderate to severe corticosteroid-responsive dermatoses of the scalp.

fluocinonide: approved small molecule (32 associated side effects) A topical anti-inflammatory product for the relief of the inflammatory and pruritic manifestations of corticosteroid-responsive dermatoses.

prednicarbate: approved small molecule (21 associated side effects) For the relief of the inflammatory and pruritic manifestations of corticosteroid-responsive dermatoses.

fluoxymesterone: illicit, approved small molecule (35 associated side effects) In males, used as replacement therapy in conditions associated with symptoms of deficiency or absence of endogenous testosterone. In females, for palliation of androgen responsive recurrent mammary cancer in women who are more than one year but less than five years postmenopausal.

budesonide: approved small molecule (196 associated side effects) For the treatment of mild to moderate active Crohn's disease. Also for the treatment of asthma, non-infectious rhinitis (including hay fever and other allergies), and for treatment and prevention of nasal polyposis.

dexamethasone: approved small molecule (147 associated side effects)

cortisone acetate: approved small molecule (0 associated side effects) For the relief of the inflammatory and pruritic manifestations of corticosteroid-responsive dermatoses. Also used to treat endocrine (hormonal) disorders (adrenal insufficiency, Addison's disease). It is also used to treat many immune and allergic disorders.

paramethasone: approved small molecule (0 associated side effects) For the treatment of all conditions in which corticosteroid therapy is indicated except adrenal-deficiency states for which its lack of sodium-retaining properties makes it less suitable than hydrocortisone with supplementary fludrocortisone.

ciclesonide: approved small molecule (90 associated side effects) For the treatment of nasal symptoms associated with seasonal and perennial allergic rhinitis in adults and adolescents 12 years of age and older.

hexane-1,6-diol: experimental small molecule (0 associated side effects)

difluprednate: approved small molecule (0 associated side effects) For the treatment of inflammation and pain associated with ocular surgery.

546 known side effects mediated through drugs targeting this protein:

Abdominal discomfort Abdominal distension Abdominal pain  
Abdominal pain upper Abnormal sensation in eye Abscess  
Abscess sterile Acne Acute coronary syndrome Adrenal  
insufficiency Affect lability Ageusia Aggression Agitation  
Alanine aminotransferase increased Albuminuria Alkalosis  
hypokalaemic Alopecia Amblyopia Amenorrhoea Amnesia  
Anaemia Anaphylactic shock Anaphylactoid reaction  
Androgenetic alopecia Angioedema Angiopathy Anorectal  
disorder Anosmia Anxiety Aortic dissection Application site  
atrophy Application site reaction Arachnoiditis Arrhythmia  
Arthralgia Arthritis Arthropathy Asteatosis Asthenia  
Asthma Atopy Atrophy Azoospermia Back pain Bacterial  
infection Balance disorder Benign intracranial hypertension  
Bladder dysfunction Bladder pain Blepharitis Blindness  
Blindness cortical Blister Blood alkaline phosphatase  
increased Blood cholesterol increased Blood glucose decreased  
Blood lactate dehydrogenase increased Blood potassium  
decreased Blood potassium increased Body temperature increased  
Bone density decreased Bone disorder Bradycardia Breast  
cancer Breast disorder Breast feeding Bronchitis  
Bronchospasm Bronchospasm paradoxical Burkitt's  
lymphoma Burning sensation Calcinosis Candidiasis Capillary  
fragility Carbohydrate tolerance decreased Cardiac arrest  
Cardiac disorder Cardiac failure Cardiac failure congestive  
Cardiomegaly Cardiomyopathy Carpal tunnel syndrome  
Cataract cortical Cataract nuclear Cataract subcapsular  
Cerebrovascular accident Chest discomfort Chest pain  
Chills Chorioretinopathy Choroidal detachment Cleft  
palate Coagulopathy Cognitive disorder Coma Coma  
hepatic Compression fracture Condition aggravated Confusional  
state Congenital anomaly Congenital eye disorder  
Conjunctival haemorrhage Conjunctival hyperaemia

Conjunctival oedema      Conjunctivitis      Connective tissue  
 disorder      Constipation      Convulsion      Corneal erosion      Corneal  
 infection      Corneal oedema      Corneal staining      Cough      Cushing's  
 syndrome      Cushingoid      Cystitis      Cystitis noninfective      Deafness  
 Deafness neurosensory      Death      Decreased appetite      Deep vein  
 thrombosis      Delirium      Delusion      Dementia      Dental plaque  
 Dependence      Dermatitis      Dermatitis acneiform      Dermatitis atopic  
 Dermatitis bullous      Dermatitis contact      Dermatitis  
 infected      Developmental delay      Diabetes mellitus      Diarrhoea  
 Diplegia      Discomfort      Disease progression      Dissociation  
 Disturbance in sexual arousal      Dizziness      Dizziness  
 postural      Drug interaction      Dry eye      Dry mouth      Dry skin      Dry  
 throat      Dysgeusia      Dysmenorrhoea      Dyspepsia      Dysphonia  
 Dyspnoea      Dysuria      Ear discomfort      Ear disorder      Ear  
 infection      Ear pain      Ecchymosis      Ectopic pregnancy      Eczema  
 Elderly      Electroencephalogram abnormal      Electrolyte  
 imbalance      Embolism      Embolism venous      Emotional distress  
 Endocrine disorder      Endometritis      Enlarged clitoris  
 Enteritis      Epistaxis      Erectile dysfunction      Erythema  
 Erythema multiforme      Erythema of eyelid      Euphoric mood  
 Exophthalmos      External ear disorder      Extravasation      Eye  
 discharge      Eye disorder      Eye infection      Eye inflammation      Eye  
 irritation      Eye pain      Eye pruritus      Eye swelling      Eyelid  
 oedema      Eyelid ptosis      Face oedema      Fat embolism      Fatigue  
 Febrile neutropenia      Feeling abnormal      Fistula      Flatulence  
 Fluid retention      Flushing      Folliculitis      Food allergy  
 Food interaction      Fungal infection      Fungal skin infection  
 Furuncle      Gastric disorder      Gastric haemorrhage  
 Gastroenteritis      Gastrointestinal disorder      Gastrointestinal  
 fistula      Gastrointestinal pain      Genital discharge      Glaucoma  
 Glossitis      Glucose tolerance decreased      Glucose tolerance  
 impaired      Glycosuria      Gravitational oedema      Growth retardation  
 Gynaecomastia      HIV infection      Haematuria      Haemoglobin  
 Haemorrhage      Haemorrhoids      Hair growth abnormal  
 Hallucination      Headache      Hearing impaired      Heat rash  
 Hepatic function abnormal      Hepatomegaly      Herpes simplex  
 Herpes virus infection      Hiccups      Hirsutism      Hormone level  
 abnormal      Hot flush      Hydrocephalus      Hyperadrenocorticism  
 Hyperaemia      Hyperaesthesia      Hypercalcaemia      Hyperglycaemia  
 Hyperhidrosis      Hyperkeratosis      Hyperkinesia  
 Hypernatraemia      Hypersensitivity      Hypertension  
 Hyperthyroidism      Hypertonia      Hypertrichosis      Hypertrophic  
 cardiomyopathy      Hypertrophy      Hypoaesthesia      Hypoglycaemia  
 Hypokalaemia      Hypokinesia      Hypopyon      Hypotension  
 Hypothyroidism      Ill-defined disorder      Immune system disorder  
 Immunosuppression      Impaired healing      Incontinence      Increased  
 appetite      Increased tendency to bruise      Induration      Infarction  
 Infection      Infection susceptibility increased      Infestation  
 Inflammation      Inflammatory bowel disease      Influenza  
 Injection site haemorrhage      Injection site reaction  
 Insomnia      Interstitial lung disease      Intestinal obstruction  
 Intracranial pressure increased      Intraocular pressure  
 increased      Iridocyclitis      Irritability      Ischaemic neuropathy  
 Jaundice      Jaundice cholestatic      Joint swelling      Keratitis  
 Keratitis herpetic      Keratosis pilaris      Laboratory test



abnormal Lacrimation increased Laryngitis Lethargy  
 Leukocytosis Leukoderma Leukopenia Libido decreased Lip  
 swelling Lipids abnormal Lipoatrophy Lipohypertrophy Loss of  
 consciousness Lung disorder Lupus miliaris disseminatus faciei  
 Lymphadenopathy Macular oedema Maculopathy Malaise Mania  
 Mass Mediastinal disorder Menopausal symptoms Menorrhagia  
 Menstrual disorder Menstruation irregular Mental disability  
 Mental disorder Metabolic alkalosis Metrorrhagia  
 Migraine Monoplegia Mood swings Mucous membrane disorder  
 Multiple hereditary exostosis Muscle mass Muscle spasms  
 Muscular weakness Musculoskeletal chest pain Musculoskeletal  
 discomfort Musculoskeletal pain Myalgia Mydriasis Myocardial  
 infarction Myocardial rupture Myopathy Myringitis Nasal  
 congestion Nasal discomfort Nasal dryness Nasal septum disorder  
 Nasal septum perforation Nasal ulcer Nasopharyngitis  
 Nausea Neck pain Necrosis Necrosis ischaemic  
 Neoplasm malignant Nervous system disorder Nervousness  
 Neuritis Neuropathy peripheral Neutropenia Nitrogen balance  
 negative Nocturia Obstruction Obstructive airways disorder  
 Ochronosis Ocular hypertension Oedema Oedema peripheral  
 Oesophagitis Oesophagitis ulcerative Opportunistic  
 infection Optic nerve disorder Optic neuritis Oral candidiasis  
 Oral fungal infection Oropharyngeal candidiasis  
 Oropharyngeal discomfort Oropharyngeal pain  
 Osteoarthritis Osteonecrosis Osteopenia Osteoporosis  
 Otitis externa Otitis media acute Ovarian disorder Pain  
 Pain in extremity Palpitations Pancreatitis  
 Pancreatitis haemorrhagic Papilloedema Papule  
 Paraesthesia Parametritis Paraparesis Paraplegia  
 Pathological fracture Peliosis hepatis Pelvic inflammatory  
 disease Pelvic pain Peptic ulcer Personality change  
 Petechiae Pharyngeal disorder Pharyngeal oedema Pharyngitis  
 Pharyngitis streptococcal Photophobia Photopsia  
 Photosensitivity reaction Pigmentation disorder Pleurisy  
 Pneumonia Pollakiuria Polycythaemia Postmenopausal  
 haemorrhage Premature baby Prostatic dysplasia Pruritus  
 Psoriasis Psychiatric symptom Psychotic disorder  
 Pulmonary congestion Pulmonary embolism Pulmonary oedema  
 Purpura Pustular psoriasis Pyoderma Pyuria  
 Quadriplegia Rash Rash follicular Rash maculo-papular  
 Rash papular Rash pustular Red blood cell sedimentation  
 rate increased Respiratory disorder Respiratory tract congestion  
 Respiratory tract infection Retinal disorder Retinal  
 haemorrhage Retinitis pigmentosa Retinopathy of prematurity  
 Rhinitis Rhinitis perennial Rhinorrhoea Rosacea  
 Ruptured ectopic pregnancy Salivary hypersecretion  
 Salmonellosis Salpingitis Sarcoma Scab Schizophrenia  
 Scleral disorder Seborrhoeic dermatitis Secondary  
 adrenocortical insufficiency Sensation of foreign body Sensation  
 of pressure Sensitisation Sensory loss Shock Sinus congestion  
 Sinus headache Sinusitis Skin atrophy Skin bacterial  
 infection Skin depigmentation Skin discolouration Skin  
 disorder Skin exfoliation Skin hyperpigmentation Skin hypertrophy  
 Skin infection Skin irritation Skin striae Skin test  
 positive Skin tightness Skin warm Sleep disorder Small for

dates baby Sneezing Social avoidant behaviour Somnolence  
Spinal cord infarction Stillbirth Stomatitis Stridor  
Swelling Syncope Synovial cyst Tachycardia  
Telangiectasia Tenderness Tension Teratogenicity  
Thinking abnormal Throat irritation Thrombophlebitis Thrombosis  
Tongue disorder Tongue oedema Tooth disorder Toothache  
Toxic epidermal necrolysis Tremor Tumour flare  
Tumour invasion Type 1 diabetes mellitus Type IV  
hypersensitivity reaction Ulcer Ulcerative keratitis Upper  
respiratory tract infection Urethral disorder Urinary incontinence  
Urinary tract disorder Urinary tract infection Urticaria  
Uterine haemorrhage Uterine spasm Uterovaginal prolapse  
Uveitis Vaginal discharge Vaginal haemorrhage Vaginal  
infection Vaginal inflammation Varicella Vascular purpura  
Vasculitis Vasculitis necrotising Venous thrombosis Vertigo  
Viral diarrhoea Viral infection Virilism Vision blurred  
Visual acuity reduced Visual impairment Vitreous detachment  
Vitreous floaters Vitreous haemorrhage Vitreous opacities  
Vomiting Weight decreased Weight increased Wheezing White  
blood cell count increased Wound dehiscence

\*\*\*\*\*  
\*\*\*\*\*

Gamma-aminobutyric-acid receptor subunit alpha-6 - Group: Channel

Treated with:

lorazepam: approved small molecule (126 associated side effects) For the management of anxiety disorders, and for treatment of status epilepticus.

ethchlorvynol: illicit, approved small molecule (0 associated side effects) Used for short-term hypnotic therapy in the management of insomnia for periods of up to one week in duration; however, this medication generally has been replaced by other sedative-hypnotic agents.

temazepam: approved small molecule (35 associated side effects) For the short-term treatment of insomnia (generally 7-10 days).

butabarbital: illicit, approved small molecule (0 associated side effects) For short-term treatment of insomnia and anxiety disorders

butalbital: illicit, approved small molecule (0 associated side effects) Used in combination with acetaminophen or aspirin and caffeine for its sedative and relaxant effects in the treatment of tension headaches, migraines, and pain.

talbutal: illicit, approved small molecule (0 associated side effects) For use as a sedative and hypnotic.

pentobarbital: approved small molecule (38 associated side effects) For the short-term treatment of insomnia.

clobazam: illicit, approved small molecule (58 associated side effects) For treatment and management of epilepsy and anxiety disorder.

meprobamate: illicit, approved small molecule (54 associated side effects) For the management of anxiety disorders or for the short-term relief of the symptoms of anxiety.

alprazolam: illicit, approved small molecule (178 associated side effects) For the management of anxiety disorder or the short-term

relief of symptoms of anxiety and for the treatment of panic disorder, with or without agoraphobia.

secobarbital: approved small molecule (38 associated side effects) For the Short-term treatment of intractable insomnia for patients habituated to barbiturates

metharbital: approved small molecule (0 associated side effects) Metharbital is used for the treatment of epilepsy.

chlordiazepoxide: illicit, approved small molecule (20 associated side effects) For the management of anxiety disorders or for the short-term relief of symptoms of anxiety, withdrawal symptoms of acute alcoholism, and preoperative apprehension and anxiety.

thiopental: approved small molecule (0 associated side effects) For use as the sole anesthetic agent for brief (15 minute) procedures, for induction of anesthesia prior to administration of other anesthetic agents, to supplement regional anesthesia, to provide hypnosis during balanced anesthesia with other agents for analgesia or muscle relaxation, for the control of convulsive states during or following inhalation anesthesia or local anesthesia, in neurosurgical patients with increased intracranial pressure, and for narcoanalysis and narcosynthesis in psychiatric disorders.

clorazepate: illicit, approved small molecule (0 associated side effects) For the management of anxiety disorders or for the short-term relief of the symptoms of anxiety. Also used as adjunctive therapy in the management of partial seizures and for the symptomatic relief of acute alcohol withdrawal.

midazolam: illicit, approved small molecule (119 associated side effects) For use as a sedative perioperatively.

flurazepam: illicit, approved small molecule (62 associated side effects) For short-term and intermittent use in patients with recurring insomnia and poor sleeping habits

primidone: approved small molecule (16 associated side effects) For the treatment of epilepsy

oxazepam: approved small molecule (36 associated side effects) For the treatment of anxiety disorders and alcohol withdrawal.

methylphenobarbital: approved small molecule (37 associated side effects) For the relief of anxiety, tension, and apprehension, also used as an anticonvulsant for the treatment of epilepsy.

triazolam: illicit, approved, withdrawn small molecule (66 associated side effects) For the short-term treatment of insomnia.

amobarbital: illicit, approved small molecule (0 associated side effects)

aprobarbital: illicit, approved small molecule (0 associated side effects)

butethal: illicit, approved small molecule (0 associated side effects) For the treatment of insomnia.

heptabarbital: approved small molecule (0 associated side effects) Used mainly for sedation and hypnosis.

hexobarbital: approved small molecule (0 associated side effects) For the induction of anesthesia prior to the use of other general anesthetic agents and for induction of anesthesia for short surgical, diagnostic, or therapeutic procedures associated with minimal painful stimuli.

barbituric acid derivative: illicit,experimental small molecule  
(0 associated side effects)

flunitrazepam: illicit,approved small molecule (0 associated  
side effects) For short-term treatment of severe insomnias, that  
are not responsive to other hypnotics.

bromazepam: illicit,approved small molecule (47 associated side  
effects) For the short-term treatment of insomnia, short-term  
treatment of anxiety or panic attacks, if a benzodiazepine is  
required, and the alleviation of the symptoms of alcohol- and  
opiate-withdrawal.

361 known side effects mediated through drugs targeting this  
protein:

Abdominal discomfort Abdominal distension Abdominal pain  
Abnormal dreams Acidosis Affect lability Aggression  
Agitation Agranulocytosis Akathisia Alcohol poisoning  
Alopecia Altered state of consciousness Amnesia  
Anaemia Anaemia megaloblastic Anaphylactic shock  
Anaphylactoid reaction Anger Angioedema Angiopathy Anterograde  
amnesia Anuria Anxiety Aortic dissectionApathy  
Aplasia Aplastic anaemia Apnoea Arrhythmia Arterial  
spasm Arthralgia Aspartate aminotransferase increased Aspiration  
Asthma Asthma Ataxia Athetosis Atrioventricular  
block Back pain Balance disorder Bladder pain Blood alkaline  
phosphatase increased Blood bilirubin increased Blood disorder  
Blood glucose decreased Body temperature decreased Body  
temperature increased Borderline personality disorder Bradycardia  
Bradyphrenia Brain oedema Breast disorder Bronchitis  
Bronchospasm Carbon dioxide increased Cardiac arrest  
Cardiac disorder Cardiac failure Cardio-respiratory arrest  
Chest discomfort Chest pain Chills Choking sensation  
Clonic convulsionClonus Clumsiness Coagulopathy  
Cognitive disorder Coma Completed suicideConfusional state  
Connective tissue disorder Constipation Convulsion  
Coordination abnormal Cough Cystitis Cystitis noninfective  
Cytolytic hepatitis Death Decreased appetite Delirium  
Delirium tremens Delusion Dependence Depersonalisation  
Depressed level of consciousness Depressed mood Depression  
Derealisation Dermatitis Dermatitis bullous Dermatitis  
exfoliative Diarrhoea Diplopia Discomfort Disinhibition  
Disorientation Disturbance in attention Disturbance in  
sexual arousal Dizziness Drooling Drug abuse Drug dependence  
Drug eruption Drug intolerance Drug withdrawal convulsions  
Dry mouth Dysaesthesia Dysarthria Dysgeusia Dyskinesia  
Dysmenorrhoea Dyspepsia Dysphagia Dysphonia Dysphoria  
Dyspnoea Dysthymic disorder Dystonia Dysuria Ear  
pain Ecchymosis Effusion Emotional disorder Emotional  
distress Encephalopathy Energy increased Eosinophilia  
Epilepsy Epistaxis Erectile dysfunction Erythema  
Erythema multiforme Euphoric mood Extrapyrarnidal  
disorder Extrasystoles Eye disorder Eye irritation  
Fatigue Feeling abnormal Feeling cold Feeling drunk  
Feeling hot Feeling jittery Feeling of body temperature change  
Flat affect Flushing Gait disturbance Galactorrhoea  
Gangrene Gastric disorder Gastrointestinal disorder

Gastrointestinal haemorrhage Gastrointestinal pain Glossitis  
 Glossodynia Gynaecomastia Haematoma Haemoglobin Haemoglobin  
 decreased Haemorrhage Hallucination Hangover Headache  
 Hepatic enzyme increased Hepatic failure Hepatic function  
 abnormal Hepatitis Hepatocellular injury Hiccups Homicidal  
 ideation Hostility Hypercapnia Hyperhidrosis Hyperkinesia  
 Hyperprolactinaemia Hyperpyrexia Hypersensitivity  
 Hypersomnia Hypertension Hyperventilation Hypoaesthesia  
 Hypochromic anaemia Hypomania Hyponatraemia Hypopnoea  
 Hypotension Hypothermia Hypotonia Hypoventilation Hypoxia  
 Ill-defined disorder Inappropriate antidiuretic hormone  
 secretion Incontinence Increased appetite Induration  
 Infection Infestation Influenza Injection site pain  
 Injection site reaction Insomnia Intraocular pressure  
 increased Irritability Jaundice Laryngospasm Lethargy  
 Leukocytosis Leukopenia Libido decreased Libido increased  
 Liver function test abnormal Liver injury Logorrhoea Loss  
 of consciousness Lung disorder Lymphadenopathy Major depression  
 Malaise Mania Mean arterial pressure Mediastinal disorder  
 Memory impairment Menstrual disorder Menstruation irregular  
 Mental disability Mental disorder Mental retardation  
 Miosis Mood swings Muscle relaxant therapy Muscle  
 rigidity Muscle spasms Muscle spasticity Muscle twitching  
 Muscular weakness Musculoskeletal discomfort Musculoskeletal  
 stiffness Myalgia Mydriasis Myoclonus Nasal congestion  
 Nasopharyngitis Nausea Necrosis Nervous system  
 disorder Nervousness Neuroleptic malignant syndrome Neuropathy  
 peripheral Nightmare Nodal rhythm Nystagmus Obstruction  
 Obstructive airways disorder Oedema Oedema peripheral  
 Oliguria Oropharyngeal pain Osteoarthritis  
 Osteomalacia Pain Pain in extremity Palpitations  
 Pancytopenia Paraesthesia Paralysis Pericardial  
 effusion Personality disorder Petechiae Phaeochromocytoma  
 Phlebitis Phobia Photophobia Pneumonia Pneumothorax  
 Post-traumatic stress disorder Premenstrual syndrome  
 Presyncope Proctitis Pruritus Psychomotor retardation  
 Psychotic disorder Pulmonary function test decreased  
 Pulmonary haemorrhage Pulmonary hypertension Pulmonary oedema  
 Purpura non-thrombocytopenic Rash Rash maculo-papular  
 Respiratory arrest Respiratory depression Respiratory  
 disorder Respiratory failure Respiratory rate decreased  
 Respiratory tract infection Retching Retrograde amnesia  
 Rhinitis allergic Rhinorrhoea Rhonchi Salivary  
 hypersecretion Sedation Sexual dysfunction Shock Sinus  
 tachycardia Skin exfoliation Skin necrosis Sleep apnoea syndrome  
 Sleep disorder Sleep talking Sluggishness Sneezing  
 Somnambulism Somnolence Stevens-Johnson syndrome  
 Stomatitis Strabismus Stridor Stupor Substance abuse  
 Suicidal ideation Swelling Swollen tongue Syncope  
 Tachycardia Tachypnoea Tenderness Tension Therapeutic  
 response decreased Thinking abnormal Thirst Thrombocytopenia  
 Thrombocytopenic purpura Thrombocytosis Thrombophlebitis  
 Tinnitus Toothache Toxic epidermal necrolysis Tremor  
 Upper airway obstruction Upper respiratory tract infection  
 Urethral disorder Urinary incontinence Urinary retention

Urinary tract disorder Urinary tract infection Urticaria  
Vascular purpura Ventricular arrhythmia Ventricular  
extrasystoles Vertigo Vision blurred Visual impairment  
Vomiting Weight decreased Weight increased Wheezing  
Withdrawal syndrome Yawning

\*\*\*\*\*  
\*\*\*\*\*

Electrogenic sodium bicarbonate cotransporter 1 - Group: Transporter  
Treated with:

sodium bicarbonate: approved small molecule (10 associated  
side effects) Sodium bicarbonate is used for the treatment of  
metabolic acidosis which may occur in severe renal disease,  
uncontrolled diabetes, circulatory insufficiency due to shock or  
severe dehydration, extracorporeal circulation of blood, cardiac  
arrest and severe primary lactic acidosis. Also is indicated in  
severe diarrhea which is often accompanied by a significant loss of  
bicarbonate. Further indicated in the treatment of certain drug  
intoxications, including barbiturates (where dissociation of the  
barbiturateprotein complex is desired), in poisoning by salicylates  
or methyl alcohol and in hemolytic reactions requiring  
alkalinization of the urine to diminish nephrotoxicity of blood  
pigments.

10 known side effects mediated through drugs targeting this protein:  
Aggression Alkalosis Cellulitis Extravasation Hypernatraemia  
Irritability Metabolic alkalosis Necrosis Tetany  
Ulcer

\*\*\*\*\*  
\*\*\*\*\*

Acetylcholine receptor subunit alpha - Group: Channel

Treated with:

galantamine: approved small molecule (160 associated side  
effects) For the treatment of mild to moderate dementia of the  
Alzheimer's type. Has also been investigated in patients with mild  
cognitive impairment who did not meet the diagnostic criteria for  
Alzheimer's disease.

160 known side effects mediated through drugs targeting this  
protein:

Abdominal discomfort Abdominal pain Aggression Agitation  
Anaemia Anxiety Apathy Aphasia Apraxia  
Arrhythmia Arrhythmia supraventricular Arthralgia Arthritis  
Asthenia Ataxia Atrial fibrillation Atrioventricular  
block Back pain Bladder pain Blood alkaline phosphatase  
increased Blood urea increased Body temperature increased Bone  
pain Bradycardia Bronchitis Bundle branch block Cardiac failure  
Cardiac fibrillation Cardiovascular disorder Cataract  
Cerebrovascular accident Cerebrovascular disorder Chest  
pain Coagulopathy Completed suicide Confusional state  
Constipation Convulsion Cough Cystitis Cystitis  
noninfective Decreased appetite Dehydration Delirium  
Depression Dermatitis Diarrhoea Discomfort Disturbance in  
sexual arousal Diverticulitis Dizziness Dry mouth Dysgeusia  
Dyspepsia Dysphagia Electrocardiogram QT prolonged  
Electrocardiogram T wave inversion Epistaxis Eye disorder

Fatigue      Feeling abnormal   Flat affect   Flatulence   Gastric  
 disorder    Gastritis    Gastroenteritis   Gastrointestinal haemorrhage  
 Gastrointestinal pain   Gravitational oedema   Haematuria  
 Haemoglobin Haemorrhage   Hallucination    Headache    Hepatic  
 enzyme increased   Hepatitis    Hepatobiliary disease   Hiccups  
 Hyperglycaemia    Hyperkinesia      Hypersensitivity   Hypersomnia  
 Hypertension      Hypertonia    Hypokalaemia      Hypokinesia  
 Hypotension   Ill-defined disorder   Immune system disorder  
 Incontinence      Infarction    Infection    Insomnia    Ischaemia  
 Lethargy    Libido increased   Liver disorder    Loss of  
 consciousness    Lower gastrointestinal haemorrhage   Malaise  
 Melaena      Mental disorder   Muscle contractions involuntary  
 Muscle spasms    Musculoskeletal discomfort   Musculoskeletal  
 disorder    Myalgia    Myocardial ischaemia   Nausea  
 Nephrolithiasis   Nervous system disorder    Nervousness  
 Neuropathy peripheral   Nightmare    Nocturia    Oedema  
 Oedema peripheral   Oesophageal disorder    Oesophageal  
 perforation   Orthostatic hypotension    Pain in extremity  
 Palpitations      Paraesthesia      Paranoia    Pneumonia  
 Pollakiuria    Purpura    Rash    Rectal haemorrhage    Renal  
 failure    Respiratory disorder    Respiratory tract infection  
 Rhinitis    Salivary hypersecretion    Shock    Somnolence  
 Suicidal ideation    Suicide attempt    Supraventricular tachycardia  
 Syncope      Tachycardia    Tension      Thrombocytopenia  
 Thrombocytosis    Tinnitus      Transient ischaemic attack  
 Tremor      Upper respiratory tract infection    Urethral disorder  
 Urinary incontinence    Urinary retention    Urinary tract disorder  
 Urinary tract infection      Vascular dementia    Vascular purpura  
 Ventricular tachycardia      Vertigo      Vision blurred  
 Vomiting      Weight decreased

\*\*\*\*\*  
 \*\*\*\*\*

Gamma-aminobutyric-acid receptor subunit alpha-2 - Group: Channel  
 Treated with:

lorazepam: approved    small molecule    (126 associated side  
 effects)    For the management of anxiety disorders, and for  
 treatment of status epilepticus.

ethchlorvynol:    illicit, approved    small molecule    (0 associated  
 side effects)    Used for short-term hypnotic therapy in the  
 management of insomnia for periods of up to one week in duration;  
 however, this medication generally has been replaced by other  
 sedative-hypnotic agents.

temazepam: approved    small molecule    (35 associated side effects)  
 For the short-term treatment of insomnia (generally 7-10  
 days).

butabarbital:    illicit, approved    small molecule    (0 associated  
 side effects)    For short-term treatment of insomnia and anxiety  
 disorders

butalbital: illicit, approved    small molecule    (0 associated side  
 effects)    Used in combination with acetaminophen or aspirin and  
 caffeine for its sedative and relaxant effects in the treatment of  
 tension headaches, migraines, and pain.

talbutal:    illicit, approved    small molecule    (0 associated side  
 effects)    For use as a sedative and hypnotic.

pentobarbital: approved small molecule (38 associated side effects) For the short-term treatment of insomnia.

clobazam: illicit,approved small molecule (58 associated side effects) For treatment and management of epilepsy and anxiety disorder.

meprobamate: illicit,approved small molecule (54 associated side effects) For the management of anxiety disorders or for the short-term relief of the symptoms of anxiety.

eszopiclone: approved small molecule (0 associated side effects) For the treatment of insomnia

alprazolam:illicit,approved small molecule (178 associated side effects) For the management of anxiety disorder or the short-term relief of symptoms of anxiety and for the treatment of panic disorder, with or without agoraphobia.

secobarbital: approved small molecule (38 associated side effects) For the Short-term treatment of intractable insomnia for patients habituated to barbiturates

zolpidem: approved small molecule (282 associated side effects) For the short-term treatment of insomnia.

metharbital: approved small molecule (0 associated side effects) Metharbital is used for the treatment of epilepsy.

chlordiazepoxide:illicit,approved small molecule (20 associated side effects) For the management of anxiety disorders or for the short-term relief of symptoms of anxiety, withdrawal symptoms of acute alcoholism, and preoperative apprehension and anxiety.

adinazolam:approved small molecule (0 associated side effects) For the treatment of anxiety and status epilepticus.

thiopental:approved small molecule (0 associated side effects) For use as the sole anesthetic agent for brief (15 minute) procedures, for induction of anesthesia prior to administration of other anesthetic agents, to supplement regional anesthesia, to provide hypnosis during balanced anesthesia with other agents for analgesia or muscle relaxation, for the control of convulsive states during or following inhalation anesthesia or local anesthesia, in neurosurgical patients with increased intracranial pressure, and for narcoanalysis and narcosynthesis in psychiatric disorders.

clorazepate: illicit,approved small molecule (0 associated side effects) For the management of anxiety disorders or for the short-term relief of the symptoms of anxiety. Also used as adjunctive therapy in the management of partial seizures and for the symptomatic relief of acute alcohol withdrawal.

midazolam: illicit,approved small molecule (119 associated side effects) For use as a sedative perioperatively.

flurazepam:illicit,approved small molecule (62 associated side effects) For short-term and intermittent use in patients with recurring insomnia and poor sleeping habits

primidone: approved small molecule (16 associated side effects) For the treatment of epilepsy

halazepam: illicit,approved small molecule (0 associated side effects) Used to relieve anxiety, nervousness, and tension associated with anxiety disorders.

diazepam: illicit,approved small molecule (149 associated side effects) Used in the treatment of severe anxiety disorders, as a hypnotic in the short-term management of insomnia, as a sedative and



premedicant, as an anticonvulsant, and in the management of alcohol withdrawal syndrome.

oxazepam: approved small molecule (36 associated side effects)  
For the treatment of anxiety disorders and alcohol withdrawal.

methylphenobarbital: approved small molecule (37 associated side effects)  
For the relief of anxiety, tension, and apprehension, also used as an anticonvulsant for the treatment of epilepsy.

triazolam: illicit,approved,withdrawn small molecule (66 associated side effects)  
For the short-term treatment of insomnia.

clonazepam: illicit,approved small molecule (228 associated side effects)  
Used as an anticonvulsant in the treatment of the Lennox-Gastaut syndrome (petit mal variant), akinetic and myoclonic seizures.

flumazenil: approved small molecule (100 associated side effects)  
For the complete or partial reversal of the sedative effects of benzodiazepines in cases where general anesthesia has been induced and/or maintained with benzodiazepines, and where sedation has been produced with benzodiazepines for diagnostic and therapeutic procedures. Also for the management of benzodiazepine overdose as an adjunct for appropriate supportive and symptomatic measures.

estazolam: illicit,approved small molecule (131 associated side effects)  
For the short-term management of insomnia characterized by difficulty in falling asleep, frequent nocturnal awakenings, and/or early morning awakenings.

quinidine barbiturate: approved small molecule (0 associated side effects)

amobarbital: illicit,approved small molecule (0 associated side effects)

aprobarbital: illicit,approved small molecule (0 associated side effects)

butethal: illicit,approved small molecule (0 associated side effects)  
For the treatment of insomnia.

heptabarbital: approved small molecule (0 associated side effects)  
Used mainly for sedation and hypnosis.

hexobarbital: approved small molecule (0 associated side effects)  
For the induction of anesthesia prior to the use of other general anesthetic agents and for induction of anesthesia for short surgical, diagnostic, or therapeutic procedures associated with minimal painful stimuli.

barbituric acid derivative: illicit,experimental small molecule (0 associated side effects)

flunitrazepam: illicit,approved small molecule (0 associated side effects)  
For short-term treatment of severe insomnias, that are not responsive to other hypnotics.

bromazepam: illicit,approved small molecule (47 associated side effects)  
For the short-term treatment of insomnia, short-term treatment of anxiety or panic attacks, if a benzodiazepine is required, and the alleviation of the symptoms of alcohol- and opiate-withdrawal.

clotiazepam: illicit,approved small molecule (0 associated side effects)  
For the treatment of anxiety disorders.

fludiazepam: illicit, approved small molecule (0 associated side effects) Used for the short-term treatment of anxiety disorders.

prazepam: illicit, approved small molecule (0 associated side effects) For the treatment of anxiety disorders.

quazepam: illicit, approved small molecule (0 associated side effects) Used to treat insomnia.

cinolazepam: approved small molecule (0 associated side effects) For the management of anxiety disorders or for the short-term relief of the symptoms of anxiety or anxiety associated with depressive symptoms.

617 known side effects mediated through drugs targeting this protein:

Abdominal discomfort Abdominal distension Abdominal pain  
 Abdominal tenderness Abnormal dreams Abnormal faeces  
 Abscess Acidosis Acne Acute coronary syndrome  
 Affect lability Ageusia Aggression Agitation  
 Agranulocytosis Akathisia Akinesia Alanine  
 aminotransferase increased Alcohol poisoning Alopecia Altered  
 state of consciousness Amblyopia Amenorrhoea Amnesia Anaemia  
 Anaemia macrocytic Anaemia megaloblastic Anaphylactic  
 shock Anaphylactoid reaction Anger Angina pectoris Angioedema  
 Angiopathy Anorectal discomfort Anorectal disorder  
 Anterograde amnesia Anuria Anxiety Aortic dissection  
 Apathy Aphasia Aphonia Aplasia Aplastic anaemia  
 Apnoea Appetite disorder Arrhythmia Arterial spasm  
 Arteritis Arthralgia Arthritis Arthropathy Aspartate  
 aminotransferase increased Asphyxia Aspiration Asthenia  
 Asthenopia Asthma Ataxia Athetosis Atrioventricular  
 block Back pain Balance disorder Binge eating Bladder  
 dysfunction Bladder pain Blindness Blood alkaline phosphatase  
 increased Blood bilirubin increased Blood disorder Blood  
 glucose decreased Blood pressure increased Blood thromboplastin  
 decreased Blood urea increased Body temperature decreased Body  
 temperature increased Borderline personality disorder Bradycardia  
 Bradyphrenia Brain oedema Breast disorder Breast  
 engorgement Breast enlargement Breast feeding Breast neoplasm  
 Breast pain Breast swelling Breath odour Bronchitis  
 Bronchospasm Bulimia nervosa Burning sensation Bursitis  
 Candidiasis Carbon dioxide increased Cardiac arrest  
 Cardiac disorder Cardiac failure Cardio-respiratory arrest  
 Cardiovascular disorder Cellulitis Cerebellar syndrome  
 Cerebrovascular accident Cerebrovascular disorder Chest  
 discomfort Chest pain Chills Choking sensation Cholelithiasis  
 Chorea Chromaturia Clonic convulsion Clonus Clumsiness  
 Coagulopathy Cognitive disorder Colitis Coma  
 Completed suicide Confusional state Congenital skin disorder  
 Conjunctivitis Connective tissue disorder Constipation  
 Conversion disorder Convulsion Coordination abnormal Cough  
 Crying Cyanosis Cystitis Cystitis noninfective  
 Cytolytic hepatitis Deafness Death Decreased appetite  
 Dehydration Delirium Delirium tremens Delusion Dementia  
 Dental caries Dependence Depersonalisation Depressed level  
 of consciousness Depressed mood Depression Depressive symptom

Derealisation      Dermatitis      Dermatitis bullous      Dermatitis  
contact      Dermatitis exfoliative      Diarrhoea      Diplopia      Discomfort  
Disinhibition      Disorientation      Disturbance in attention  
Disturbance in sexual arousal      Dizziness      Dizziness  
postural      Drooling      Drug abuse      Drug dependence      Drug eruption  
Drug hypersensitivity      Drug intolerance      Drug withdrawal  
convulsions      Dry eye      Dry mouth      Dry skin      Dry throat  
Dysaesthesia      Dysarthria      Dysgeusia      Dyskinesia  
Dysmenorrhoea      Dyspepsia      Dysphagia      Dysphonia      Dysphoria  
Dyspnoea      Dysthymic disorder      Dystonia      Dysuria      Ear  
infection      Ear pain      Ecchymosis      Eczema      Effusion      Ejaculation  
delayed      Ejaculation failure      Elderly      Embolism      Emotional  
disorder      Emotional distress      Emotional poverty      Encephalopathy  
Encopresis      Endometrial sarcoma      Energy increased      Enteritis  
Enterocolitis      Enuresis      Eosinophilia      Epilepsy  
Epistaxis      Erectile dysfunction      Eructation      Erythema  
Erythema multiforme      Euphoric mood      Extrapyrarnidal  
disorder      Extrasystoles      Eye disorder      Eye irritation      Eye  
movement disorder      Eye pain      Eye swelling      Eyelid ptosis      Face  
oedema      Faecal incontinence      Fatigue      Fear      Feeling abnormal  
Feeling cold      Feeling drunk      Feeling hot      Feeling jittery  
Feeling of body temperature change      Fibroadenoma of breast      Flat  
affect      Flatulence      Floppy infant      Flushing      Frequent bowel  
movements      Fungal infection      Furuncle      Gait disturbance  
Galactorrhoea      Gangrene      Gastric disorder      Gastric ulcer  
Gastritis      Gastroenteritis      Gastrointestinal disorder  
Gastrointestinal haemorrhage      Gastrointestinal pain  
Gastrooesophageal reflux disease      Gingival pain      Glaucoma  
Glossitis      Glossodynia      Gout      Grand mal convulsion  
Gynaecomastia      Haematoma      Haematuria      Haemoglobin      Haemoglobin  
decreased      Haemoglobinaemia      Haemorrhage      Haemorrhage urinary tract  
Haemorrhoids      Hallucination      Hangover      Headache  
Hearing impaired      Heart rate irregular      Hemiparesis      Hepatic  
enzyme increased      Hepatic failure      Hepatic function abnormal  
Hepatitis      Hepatocellular injury      Hepatomegaly      Hernia  
Herpes simplex      Herpes virus infection      Herpes zoster  
Hiccups      Hirsutism      Homicidal ideation      Hordeolum  
Hostility      Hot flush      Hunger      Hyperacusis      Hyperaemia  
Hyperaesthesia      Hyperbilirubinaemia      Hypercapnia  
Hypercholesterolaemia      Hyperglycaemia      Hyperhidrosis  
Hyperkinesia      Hyperlipidaemia      Hyperprolactinaemia  
Hyperpyrexia      Hypersensitivity      Hypersomnia      Hypertension  
Hypertonia      Hypertrophy      Hyperventilation      Hypoaesthesia  
Hypochromic anaemia      Hypokalaemia      Hypokinesia      Hypomania  
Hyponatraemia      Hypopnoea      Hyporeflexia      Hypotension  
Hypothermia      Hypotonia      Hypoventilation      Hypoxia      Ill-defined  
disorder      Illusion      Inappropriate antidiuretic hormone secretion  
Incontinence      Increased appetite      Induration      Infarction  
Infection      Infectious mononucleosis      Infestation  
Inflammation      Influenza      Influenza like illness      Injection  
site pain      Injection site reaction      Insomnia      Intestinal  
obstruction      Intraocular pressure increased      Iritis  
Irritability      Jaundice      Joint swelling      Laboratory test  
abnormal      Labyrinthitis      Lacrimal disorder      Lacrimation increased  
Laryngitis      Laryngospasm      Lethargy      Leukocytosis

Leukopenia Libido decreased Libido increased Liver disorder  
 Liver function test abnormal Liver injury Local reaction  
 Logorrhoea Loss of consciousness Loss of libido Lower  
 respiratory tract infection Lung disorder Lymphadenopathy Major  
 depression Malaise Mania Mastitis Mean arterial pressure  
 Mediastinal disorder Melaena Memory impairment Menopausal  
 symptoms Menorrhagia Menstrual disorder Menstruation irregular  
 Mental disability Mental disorder Mental retardation  
 Metrorrhagia Micturition urgency Migraine Miosis  
 Mood swings Motion sickness Mouth ulceration Movement disorder  
 Muscle contractions involuntary Muscle relaxant therapy  
 Muscle rigidity Muscle spasms Muscle spasticity Muscle  
 twitching Muscular weakness Musculoskeletal discomfort  
 Musculoskeletal disorder Musculoskeletal stiffness  
 Myalgia Mydriasis Myocardial infarction Myoclonus  
 Myopathy Nasal congestion Nasopharyngitis Nausea Neck  
 pain Necrosis Neoplasm Nephrolithiasis Nervous system  
 disorder Nervousness Neuralgia Neuritis Neuroleptic malignant  
 syndrome Neuropathy peripheral Neurosis Neutropenia Nightmare  
 Nocturia Nodal arrhythmia Nodal rhythm Nodule  
 Nuchal rigidity Nystagmus Obstruction Obstructive airways  
 disorder Ocular hyperaemia Oedema Oedema peripheral Oesophageal  
 spasm Oliguria Oropharyngeal pain Orthostatic hypotension  
 Osteoarthritis Osteomalacia Otitis externa Otitis  
 media Pain Pain in extremity Pain in jaw Pallor Palpitations  
 Pancytopenia Panic attack Panic disorder Panic  
 reaction Paraesthesia Paraesthesia oral Paralysis Paranoia  
 Paresis Parosmia Pelvic pain Penile discharge Pericardial  
 effusion Periorbital oedema Personality disorder Petechiae  
 Phaeochromocytoma Pharyngitis Phlebitis Phobia Photophobia  
 Photopsia Photosensitivity reaction Pigmentation disorder  
 Platelet count decreased Pleurisy Pneumonia  
 Pneumothorax Pollakiuria Polyuria Post-traumatic stress  
 disorder Precocious puberty Premenstrual syndrome Presyncope  
 Proctalgia Proctitis Prothrombin level increased Pruritus  
 Psychiatric symptom Psychomotor retardation Psychotic  
 disorder Puberty Pulmonary congestion Pulmonary embolism  
 Pulmonary function test decreased Pulmonary haemorrhage  
 Pulmonary hypertension Pulmonary oedema Purpura non-  
 thrombocytopenic Pyelonephritis Rash Rash maculo-papular Rash  
 pustular Rectal haemorrhage Rectal tenesmus Red blood cell  
 sedimentation rate increased Renal failure acute Renal pain  
 Respiratory arrest Respiratory depression Respiratory  
 disorder Respiratory failure Respiratory moniliasis Respiratory  
 rate decreased Respiratory tract congestion Respiratory tract  
 infection Restless legs syndrome Retching Retrograde amnesia  
 Rhinitis allergic Rhinorrhoea Rhonchi Saliva altered  
 Salivary hypersecretion Sciatica Scleritis Scotoma  
 Sedation Sensation of heaviness Sexual dysfunction Shock  
 Sinus tachycardia Sinusitis Skin burning sensation Skin  
 discolouration Skin disorder Skin exfoliation Skin necrosis  
 Skin wrinkling Sleep apnoea syndrome Sleep disorder Sleep  
 talking Sluggishness Sneezing Somnambulism Somnolence  
 Speech disorder Stevens-Johnson syndrome Stomatitis  
 Strabismus Stress Stridor Stupor Substance abuse

Suicidal ideationSuicide attempt Swelling Swelling face  
 Swollen tongue Syncope TachycardiaTachypnoea Tenderness  
 Tendonitis Tension Tetany Therapeutic response  
 decreased Thinking abnormalThirst Throat irritation  
 Thrombocytopenia Thrombocytopenic purpura Thrombocytosis  
 Thrombophlebitis Thrombosis Thyroid neoplasm Tinnitus  
 Tongue coated Tongue disorder Tongue oedema Tooth  
 disorder Toothache Toxic epidermal necrolysis Transaminases  
 increased Tremor Tropical spastic paresis Ulcerative  
 keratitis Upper airway obstruction Upper respiratory tract  
 infection Urethral disorderUrethritis Urinary hesitation  
 Urinary incontinence Urinary retentionUrinary tract disorder  
 Urinary tract infection Urine colour abnormal Urine  
 output increased Urticaria Uterine haemorrhage Uterovaginal  
 prolapse Vaginal dischargeVaginal haemorrhage Vaginal infection  
 Vaginal inflammation Varicose vein Vascular purpura  
 Vasodilation procedure Venous thrombosisVentricular arrhythmia  
 Ventricular extrasystoles Ventricular tachycardia  
 Vertigo Vestibular disorder Viral infection Vision  
 blurred Visual acuity reduced Visual impairmentVomiting  
 Vulvovaginal disorder Weight decreased Weight increased  
 Wheezing Withdrawal syndrome Xeroderma Xerophthalmia  
 Yawning

\*\*\*\*\*  
 \*\*\*\*\*

Solute carrier family 2, facilitated glucose transporter member 1 -  
 Group: Transporter  
 Treated with:  
 etomidate: approved small molecule (27 associated side effects)  
 Used in the induction of general anesthesia.

27 known side effects mediated through drugs targeting this protein:  
 Analgesic therapyApnoea Arrhythmia Bradycardia Convulsion  
 Disinhibition Hiccups Hyperventilation Hypotension  
 Hypoventilation Hypoxia Injection site pain  
 Laryngospasm Myoclonus Nausea Obstruction Obstructive  
 airways disorder Pain Procedural nauseaRespiratory failure  
 Snoring TachycardiaThrombophlebitis Thrombosis Upper  
 airway obstruction Vein pain Vomiting

\*\*\*\*\*  
 \*\*\*\*\*

Retinoic acid receptor responder protein 1 - Group: Enzyme  
 Treated with:  
 tretinoin: approved,nutraceutical small molecule (0 associated  
 side effects) For the the induction of remission in patients with  
 acute promyelocytic leukemia (APL), French-American-British (FAB)  
 classification M3 (including the M3 variant); For the topical  
 treatment of acne vulgaris, flat warts and other skin conditions  
 (psoriasis, ichthyosis congenita, ichthyosis vulgaris, lamellar  
 ichthyosis, keratosis palmaris et plantaris, epidermolytic  
 hyperkeratosis, senile comedones, senile keratosis, keratosis  
 follicularis (Darier's disease), and basal cell carcinomas.); For  
 palliative therapy to improve fine wrinkling, mottled  
 hyperpigmentation, roughness associated with photodamage.

known side effects mediated through drugs targeting this protein:

\*\*\*\*\*  
\*\*\*\*\*

Nuclear receptor ROR-beta - Group: Receptor

Treated with:

melatonin: approved, nutraceutical small molecule (0 associated side effects) Used orally for jet lag, insomnia, shift-work disorder, circadian rhythm disorders in the blind (evidence for efficacy), and benzodiazepine and nicotine withdrawal. Evidence indicates that melatonin is likely effective for treating circadian rhythm sleep disorders in blind children and adults. It has received FDA orphan drug status as an oral medication for this use. A number of studies have shown that melatonin may be effective for treating sleep-wake cycle disturbances in children and adolescents with mental retardation, autism, and other central nervous system disorders. It appears to decrease the time to fall asleep in children with developmental disabilities, such as cerebral palsy, autism, and mental retardation. It may also improve secondary insomnia associated with various sleep-wake cycle disturbances. Other possible uses for which there is some evidence for include: benzodiazepine withdrawal, cluster headache, delayed sleep phase syndrome (DSPS), primary insomnia, jet lag, nicotine withdrawal, preoperative anxiety and sedation, prostate cancer, solid tumors (when combined with IL-2 therapy in certain cancers), sunburn prevention (topical use), tardive dyskinesia, thrombocytopenia associated with cancer, chemotherapy and other disorders.

known side effects mediated through drugs targeting this protein:

\*\*\*\*\*  
\*\*\*\*\*

TGF-beta receptor type-2 - Group: Enzyme

Treated with:

glycerol: experimental small molecule (0 associated side effects)

known side effects mediated through drugs targeting this protein:

\*\*\*\*\*  
\*\*\*\*\*

Ephrin type-A receptor 2 - Group: Enzyme

Treated with:

dasatinib: approved small molecule (251 associated side effects) For the treatment of adults with chronic, accelerated, or myeloid or lymphoid blast phase chronic myeloid leukemia with resistance or intolerance to prior therapy. Also indicated for the treatment of adults with Philadelphia chromosome-positive acute lymphoblastic leukemia with resistance or intolerance to prior therapy.

phosphoaminophosphonic acid-adenylate ester: experimental small molecule (0 associated side effects)

251 known side effects mediated through drugs targeting this protein:

Abdominal distension Abdominal pain Acne Acute coronary  
syndrome Acute febrile neutrophilic dermatosis Acute respiratory  
distress syndrome Affect lability Alanine aminotransferase increased  
Alopecia Amnesia Anaemia Anal fissure Angina  
pectoris Angiopathy Anxiety Aortic dissection Aplasia  
Aplasia pure red cell Arrhythmia Arthralgia Ascites  
Aspartate aminotransferase increased Asthenia Asthma  
Atrial fibrillation Atrial flutter Blood bilirubin  
increased Blood creatine phosphokinase increased Blood creatinine  
increased Blood uric acid increased Body temperature increased  
Breast disorder Bronchospasm Cardiac disorder Cardiac  
failure Cardiac failure acute Cardiac failure congestive  
Cardiac fibrillation Cardiac flutter Cardiomegaly  
Cardiomyopathy Cell death Cerebrovascular accident Chest  
pain Chills Cholecystitis Cholestasis Chronic myeloid  
leukaemia Coagulopathy Colitis Confusional state Congestive  
cardiomyopathy Conjunctival haemorrhage Conjunctivitis  
Connective tissue disorder Constipation Convulsion Cor  
pulmonale Cough Decreased appetite Deep vein thrombosis  
Dermatitis Diarrhoea Diastolic dysfunction Discomfort  
Disease progression Disturbance in sexual arousal  
Dizziness Drug eruption Dry eye Dry skin Dysgeusia  
Dyspepsia Dysphagia Dyspnoea Ear haemorrhage Ecchymosis  
Eczema Effusion Ejection fraction decreased Embolism  
Enterocolitis Epistaxis Erythema Erythema multiforme  
Erythema nodosum Eye disorder Eye haemorrhage Fatigue  
Febrile neutropenia Feeling abnormal Fluid retention  
Flushing Gastritis Gastrointestinal disorder  
Gastrointestinal haemorrhage Gastrointestinal pain  
Gastrointestinal ulcer Generalised oedema Genital rash  
Gingival bleeding Gynaecomastia Haematoma Haematuria  
Haemoglobin Haemoptysis Haemorrhage Headache Heat rash  
Hepatic function abnormal Hepatitis Hepatobiliary disease  
Herpes virus infection Hyperhidrosis Hypersensitivity  
Hypertension Hyperuricaemia Hypoalbuminaemia  
Hypocalcaemia Hypokalaemia Hypophosphataemia Hypotension  
Ileus Ill-defined disorder Immune system disorder Infarction  
Infection Infestation Inflammation Insomnia  
Interstitial lung disease Intra-abdominal haematoma Left  
ventricular dysfunction Left ventricular failure  
Leukoencephalopathy Libido decreased Livedo reticularis  
Liver function test abnormal Lividity Localised oedema Loss  
of consciousness Lung disorder Lung infiltration Malaise  
Mediastinal disorder Menstruation irregular Mental disorder  
Milia Mucosal inflammation Muscular weakness Musculoskeletal  
discomfort Musculoskeletal pain Musculoskeletal stiffness  
Myalgia Myocardial infarction Myocarditis Myositis Nail  
disorder Nausea Neoplasm Nervous system disorder  
Neuritis Neuropathy peripheral Neutropenia Neutropenic  
colitis Oedema Oesophagitis Optic neuritis Pain  
Palpitations Pancreatitis Pancytopenia  
Panniculitis Pericardial effusion Pericarditis  
Petechiae Photosensitivity reaction Pigmentation disorder  
Platelet aggregation abnormal Pleural disorder Pleural  
effusion Pneumonia Pollakiuria Posterior reversible

encephalopathy syndrome Protein urine present Protein-losing  
gastroenteropathyProteinuria Prurigo Pruritus Pulmonary  
arterial hypertension Pulmonary embolism Pulmonary hypertension  
Pulmonary oedema Rash erythematousRash follicular Rash  
generalisedRash macular Rash maculo-papular Rash papular  
Rash pustular Rash vesicular Renal failure Respiratory  
distress Respiratory tract infection Rhabdomyolysis Scleral  
haemorrhageSepsis Shock Skin discolouration Skin disorder  
Skin exfoliation Skin irritation Skin ulcer Soft tissue  
disorder Somnolence Stomatitis Syncope Systemic lupus  
erythematosus Systemic lupus erythematosus rash Tachycardia  
Temperature intolerance Tendonitis Thrombocytopenia  
Thrombophlebitis Thrombosis Tinnitus Toxic skin eruption  
Transient ischaemic attack Tremor Tumour lysis syndrome  
Ulcer Upper respiratory tract infection Urethral disorder  
Urinary tract disorder Urticaria Urticaria vesiculosa  
Uterine haemorrhage Vaginal haemorrhage Venous thrombosis  
Ventricular arrhythmia Ventricular dysfunction Ventricular  
failure Ventricular tachycardia Vertigo Viral infection  
Vision blurred Visual acuity reduced Visual impairment  
Vomiting Weight decreased Weight increased

\*\*\*\*\*  
\*\*\*\*\*

Potassium voltage-gated channel subfamily KQT member 2 - Group:  
Channel

Treated with:

amitriptyline: approved small molecule (109 associated side  
effects) For the treatment of depression, chronic pain, irritable  
bowel syndrome, sleep disorders, diabetic neuropathy, agitation and  
insomnia, and migraine prophylaxis.

diclofenac: approved small molecule (310 associated side  
effects) For the acute and chronic treatment of signs and symptoms  
of osteoarthritis and rheumatoid arthritis.

346 known side effects mediated through drugs targeting this  
protein:

Abdominal distension Abdominal pain upper Abscess Acne Acute  
coronary syndromeAgeusia Agitation Agranulocytosis Alanine  
aminotransferase increased Alopecia Amblyopia Anaemia  
Anaphylactic shock Anaphylactoid reaction Angina pectoris  
Angioedema Angiopathy Anorectal disorder Antinuclear  
antibody positiveAnxiety Aortic dissectionAphasia Aphthous  
stomatitis Aplastic anaemia Application site reaction Arrhythmia  
Arteriosclerosis Arthralgia Arthritis Aspartate  
aminotransferase increased Asthenia Asthma Ataxia  
Atrioventricular block Atrophy Azotaemia Back pain  
Bladder pain Bleeding time prolonged Blindness  
Blister Blood creatine phosphokinase increased Blood  
creatinine increased Body temperature increased Bone pain  
BradycardiaBreast disorder Breast enlargement Breath  
odour Bronchitis Burning sensationCardiac disorder Cardiac failure  
Cardiac failure congestive Cardiomyopathy Cardiovascular  
disorder Cerebrovascular accident Chest pain Chills  
Colitis ulcerative Coma Confusional stateConjunctival  
hyperaemia Conjunctivitis allergic Constipation Convulsion



Coordination abnormal Corneal deposits Corneal disorder  
 Corneal erosion Corneal infiltrates Corneal oedema  
 Corneal opacity Cough Cystitis Cystitis noninfective  
 Deafness Death Decreased appetite Delusion Dental  
 caries Dependence Dermatitis atopic Dermatitis bullous  
 Dermatitis contact Dermatitis exfoliative Diarrhoea  
 Diarrhoea haemorrhagic Diplopia Discomfort Disorientation  
 Disturbance in attention Disturbance in sexual arousal  
 Dizziness Drug dependence Drug ineffective Dry mouth Dry  
 skin Dysarthria Dysgeusia Dyskinesia Dyspepsia Dyspnoea  
 Dysthymic disorder Dysuria Ear pain Ecchymosis  
 Eczema Enterocolitis haemorrhagic Eosinophilia  
 Epistaxis Erectile dysfunction Eructation Erythema  
 multifforme Erythema of eyelid Extrapyrarnidal disorder Eye  
 allergy Eye disorder Eye inflammation Eye irritation Eye  
 pain Eye pruritus Eyelid oedema Eyelids pruritus Face oedema  
 Fatigue Feeling abnormal Flatulence Fluid retention  
 Flushing Furuncle Gait disturbance Galactorrhoea  
 Gastric pH decreased Gastritis Gastroenteritis  
 Gastrointestinal disorder Gastrointestinal haemorrhage  
 Gastrointestinal pain Gingivitis Glossitis Gout  
 Gynaecomastia Haematemesis Haematuria Haemoglobin  
 Haemolytic anaemia Haemorrhage Haemorrhoids Hair  
 disorder Hallucination Headache Hearing impaired Henoch-  
 Schonlein purpura Hepatic cirrhosis Hepatic enzyme increased  
 Hepatic failure Hepatic function abnormal Hepatic necrosis  
 Hepatitis Hepatitis fulminant Hepatobiliary disease  
 Hepatorenal syndrome Hereditary disorder Hernia  
 Herpes simplex Herpes virus infection Hyperaemia  
 Hyperaesthesia Hyperchlorhydria Hypercholesterolaemia  
 Hyperglycaemia Hyperhidrosis Hyperkinesia  
 Hyperpyrexia Hypertension Hypertonia Hypertrophy  
 Hyperventilation Hypoaesthesia Hypoglycaemia Hypokinesia  
 Hypomania Hypotension Ileus paralytic Ill-defined disorder  
 Immune system disorder Inappropriate antidiuretic hormone  
 secretion Infarction Infection Infestation Influenza Insomnia  
 Intestinal perforation Intraocular pressure increased  
 Iritis Irritability Jaundice Keratitis Lacrimal  
 disorder Lacrimation increased Laryngeal oedema Laryngitis  
 Laryngospasm Leukopenia Libido decreased Lip swelling  
 Loss of consciousness Lymphadenopathy Malaise Mania  
 Melaena Memory impairment Meningitis aseptic Mental  
 disability Mental disorder Mental status changes Migraine Mouth  
 ulceration Muscle rigidity Muscle spasms Muscular weakness  
 Musculoskeletal discomfort Musculoskeletal pain  
 Musculoskeletal stiffness Myalgia Mydriasis Myocardial  
 infarction Nail disorder Nausea Neck pain Necrosis  
 Neoplasm malignant Nephritis Nephropathy Nephrotic  
 syndrome Nervous system disorder Nervousness Neuritis  
 Neuroleptic malignant syndrome Neuropathy peripheral Night  
 blindness Nightmare Nocturia Nodule Nuchal rigidity  
 Ocular hyperaemia Oedema Oedema peripheral Oesophageal  
 disorder Oesophagitis Oliguria Orthostatic hypotension  
 Osteoarthritis Pain Palpitations Pancreatitis  
 Pancytopenia Papule Paraesthesia Parotid gland

enlargement Peptic ulcer Pharyngitis Phlebitis Photosensitivity  
 reaction Pneumonia Pollakiuria Polyuria Proctitis Prostatic  
 specific antigen increased Protein urine present Proteinuria  
 Pruritus Psychotic disorder Pulmonary function test  
 decreased Punctate keratitis Purpura Rash Rash maculo-  
 papular Rash pustular Rectal haemorrhage Renal failure  
 acute Renal impairment Renal papillary necrosis Respiratory  
 depression Respiratory disorder Rhinitis Scotoma Seborrhoeic  
 dermatitis Sensory loss Sepsis Shock Sinusitis Skin cancer  
 Skin discolouration Skin exfoliation Skin hypertrophy Skin  
 irritation Skin mass Skin odour abnormal Skin ulcer Sleep  
 disorder Social avoidant behaviour Somnolence Speech disorder  
 Stevens-Johnson syndrome Stomatitis Swelling Syncope  
 Systemic lupus erythematosus Tachycardia Tardive dyskinesia  
 Tension Testicular disorder Testicular swelling  
 Thinking abnormal Thirst Thrombocytopenia Tic Tinnitus  
 Tongue coated Tongue discolouration Tooth abscess Toxic  
 epidermal necrolysis Tremor Tubulointerstitial nephritis  
 Ulcerative keratitis Urethral disorder Urinary retention  
 Urinary tract disorder Urine output increased Urticaria  
 Vaginal haemorrhage Vascular purpura Vasculitis  
 Vasodilation procedure Ventricular extrasystoles Vertigo  
 Viral infection Vision blurred Visual acuity reduced  
 Visual impairment Vitreous floaters Vomiting Weight decreased  
 Weight increased

\*\*\*\*\*  
 \*\*\*\*\*

Delta-type opioid receptor - Group: Receptor

Treated with:

tramadol: approved small molecule (490 associated side  
 effects) Indicated in the treatment of moderate to severe pain.  
 Consider for those prone to constipation or respiratory depression.  
 Tramadol is used to treat postoperative, dental, cancer, and acute  
 musculoskeletal pain and as an adjuvant to NSAID therapy in patients  
 with osteoarthritis.

morphine: approved small molecule (208 associated side  
 effects) For the relief and treatment of severe pain.

codeine: illicit, approved small molecule (43 associated side  
 effects) For treatment and management of pain (Systemic), also  
 used as an Antidiarrheal and as a cough suppressant.

amitriptyline: approved small molecule (109 associated side  
 effects) For the treatment of depression, chronic pain, irritable  
 bowel syndrome, sleep disorders, diabetic neuropathy, agitation and  
 insomnia, and migraine prophylaxis.

hydromorphone: illicit, approved small molecule (355 associated  
 side effects) For the relief of moderate to severe pain such as  
 that due to surgery, cancer, trauma/injury, or burns.

methadone: approved small molecule (87 associated side effects)  
 For the treatment of dry cough, drug withdrawal syndrome,  
 opioid type drug dependence, and pain.

oxycodone: illicit, approved small molecule (215 associated side  
 effects) For the treatment of diarrhoea, pulmonary oedema and for  
 the relief of moderate to moderately severe pain.

butorphanol: illicit, approved small molecule (122 associated  
 side effects) For the relief of moderate to severe pain.

propoxyphene: illicit, approved small molecule (79 associated side effects) For the relief of mild to moderate pain

naltrexone: approved small molecule (238 associated side effects) Used as an adjunct to a medically supervised behaviour modification program in the maintenance of opiate cessation in individuals who were formerly physically dependent on opiates and who have successfully undergone detoxification. Also used for the management of alcohol dependence in conjunction with a behavioural modification program.

sufentanil: approved small molecule (38 associated side effects) Used as an analgesic adjunct in anesthesia and as a primary anesthetic drug in procedures requiring assisted ventilation and in the relief of pain.

fentanyl: illicit, approved small molecule (393 associated side effects) For the treatment of cancer patients with severe pain that breaks through their regular narcotic therapy.

loperamide: approved small molecule (41 associated side effects) For the control and symptomatic relief of acute nonspecific diarrhea and of chronic diarrhea associated with inflammatory bowel disease or gastroenteritis. Also used for reducing the volume of discharge from ileostomies.

nalbuphine: approved small molecule (68 associated side effects) For the relief of moderate to severe pain.

levorphanol: approved small molecule (0 associated side effects) For the management of moderate to severe pain or as a preoperative medication where an opioid analgesic is appropriate

remifentanyl: approved small molecule (134 associated side effects) For use during the induction and maintenance of general anesthesia.

buprenorphine: illicit, approved small molecule (170 associated side effects) For the treatment of moderate to severe pain, peri-operative analgesia, and opioid dependence.

hydrocodone: illicit, approved small molecule (0 associated side effects) For relief of moderate to moderately severe pain. Also used for the symptomatic relief of nonproductive cough, alone or in combination with other antitussives or expectorants.

diphenoxylate: illicit, approved small molecule (0 associated side effects) For as adjunctive therapy in the management of diarrhea

naloxone: approved small molecule (54 associated side effects) For the complete or partial reversal of narcotic depression, including respiratory depression, induced by opioids including natural and synthetic narcotics, propoxyphene, methadone and the narcotic-antagonist analgesics: nalbuphine, pentazocine and butorphanol.

oxymorphone: approved small molecule (0 associated side effects) For the treatment of moderate-to-severe pain.

3-methylthiofentanyl: illicit, experimental small molecule (0 associated side effects)

dimethylthiambutene: illicit, experimental small molecule (0 associated side effects) Dimethylthiambutene is an opioid analgesic previously used in moderate pain relief.

heroin: illicit, experimental small molecule (0 associated side effects) Used in the treatment of acute pain, myocardial infarction, acute pulmonary oedema, and chronic pain.

etorphine: illicit,experimental small molecule (0 associated side effects)  
 carfentanil: illicit,experimental small molecule (0 associated side effects) Carfentanil is similar (but more potent) to the opioid analgesic fentanyl. It is used as a tranquilizer for large animals.  
 diprenorphine: illicit,experimental small molecule (0 associated side effects) Diprenorphine is used to reverse the effects of the super-potent opioid analgesics such as etorphine and carfentanil that are used for tranquilizing large animals in veterinary medicine. Not used in humans.  
 dihydromorphine: illicit,experimental small molecule (0 associated side effects) Dihydromorphine is an opioid analgesic used for moderate to severe pain relief.  
 3-methylfentanyl:illicit,experimental small molecule (0 associated side effects)  
 alvimopan: approved small molecule (12 associated side effects)  
 Used to accelerate the time to upper and lower gastrointestinal recovery following partial large or small bowel resection surgery with primary anastomosis. Also investigated for use in the treatment of pain (acute or chronic).

830 known side effects mediated through drugs targeting this protein:

Abdominal discomfort Abdominal distension Abdominal pain lower  
 Abdominal pain upper Abdominal tenderness Abnormal  
 behaviour Abnormal dreams Abnormal faeces Abortion missed  
 Abscess Acidosis Acne Acute coronary syndrome Acute  
 myocardial infarction Adrenal insufficiency Affect lability  
 Ageusia Aggression Agitation Agranulocytosis Akathisia  
 Alanine aminotransferase decreasedAlanine aminotransferase  
 increased AlbuminuriaAlcohol abuse Alcohol poisoningAlcohol  
 withdrawal syndrome Alcoholism Alopecia Altered state of  
 consciousness Amblyopia AmenorrhoeaAmnesia Anaemia Anal  
 fissure Analgesic therapyAnaphylactic shock Anaphylactoid  
 reaction Aneurysm Angina pectoris Angina unstable Angioedema  
 Angiopathy Anogenital dysplasia Anorectal disorder  
 Anorgasmia Anosmia Antinuclear antibody positive  
 Anxiety Aortic aneurysm Aortic dissectionApathy  
 Aphasia Aphthous stomatitis Apnoea Appendicitis  
 Appetite disorderApplication site reaction Arrhythmia  
 Arterial occlusive disease Arteriosclerosis Arteriosclerosis  
 coronary artery Arthralgia Arthritis ArthropathyAscites  
 Aspartate aminotransferase increased Asthenia Asthma  
 Ataxia AtelectasisAtrial fibrillation Atrial flutter  
 Atrioventricular block Atrioventricular block complete  
 Atrioventricular block first degree Atrioventricular block  
 second degree Atrophy Azotaemia Back disorder Back pain  
 Bacterial infection Balance disorder Bedridden Benign  
 breast neoplasm Bezoar Biliary colic Biliary tract disorder  
 Bipolar I disorder Bipolar disorder Bladder pain  
 Bladder spasm Bleeding time prolonged Blepharitis  
 Blindness Blister Blood alkaline phosphatase increased  
 Blood amylase increased Blood bilirubin increased Blood  
 cholesterol increased Blood creatine phosphokinase increased Blood

creatinine increased Blood creatinine normal Blood glucose  
abnormal Blood glucose increased Blood lactate dehydrogenase  
increased Blood potassium abnormal Blood potassium decreased  
Blood potassium increased Blood pressure fluctuation Blood  
pressure increased Blood sodium increased Blood testosterone  
decreased Blood triglycerides increased Blood urea increased  
Blood uric acid increased Body temperature decreased Body  
temperature increased Bone disorder Bone pain Bradycardia Brain  
cancer metastatic Breast cancer Breast disorder Breast  
enlargement Breast neoplasm Breast pain Breath odour Breath  
sounds abnormal Bronchitis Bronchospasm Burning sensation  
Bursitis Cachexia Cancer in remission Cancer pain  
Candidiasis Carbon dioxide increased Cardiac arrest  
Cardiac disorder Cardiac failure Cardiac failure congestive  
Cardiac fibrillation Cardiac flutter Cardiac murmur  
Cardiac output decreased Cardio-respiratory arrest  
Cardiomegaly Cardiomyopathy Cardiovascular disorder  
Carpal tunnel syndrome Cataract Cellulitis Cerebral  
infarction Cerebral ischaemia Cerebrovascular accident  
Cerumen impaction Change of bowel habit Cheilitis Chest  
discomfort Chest pain Chills Choking Cholangitis  
Cholecystitis Cholecystitis acute Cholelithiasis  
Cholestasis Chronic hepatitis Chronic obstructive pulmonary  
disease Clonic convulsion Coagulopathy Cognitive disorder  
Cold sweat Colitis Colitis ulcerative Coma Completed  
suicide Compression fracture Confusional state Conjunctivitis  
Connective tissue disorder Constipation Convulsion  
Coordination abnormal Cough Cough decreased Crying  
Crystal urine Crystalluria Cyanosis Cystitis  
Cystitis noninfective Cytolytic hepatitis Deafness  
Deafness permanent Deafness transitory Death Decreased  
appetite Decubitus ulcer Deep vein thrombosis Deficiency  
anaemia Dehydration Delirium Delusion Dementia Dental  
caries Dependence Depersonalisation Depressed level of  
consciousness Depressed mood Depression Derealisation  
Dermal cyst Dermatitis atopic Dermatitis bullous Dermatitis  
contact Dermatitis exfoliative Dermoid cyst Diabetes mellitus  
Diarrhoea Diplopia Discomfort Disorientation Disturbance  
in attention Disturbance in sexual arousal Diverticulitis  
Diverticulum Dizziness Drug abuse Drug dependence Drug  
hypersensitivity Drug interaction Drug tolerance Drug withdrawal  
syndrome Drug withdrawal syndrome neonatal Dry eye Dry mouth  
Dry skin Dry throat Duodenitis Dysarthria Dyschezia  
Dysgeusia Dyskinesia Dysmenorrhoea Dyspepsia Dysphagia  
Dysphonia Dysphoria Dyspnoea Dyspnoea exertional  
Dystonia Dysuria Ear congestion Ear discomfort Ear  
disorder Ear infection Ear pain Early satiety Ecchymosis  
Eczema Effusion Ejaculation delayed Ejaculation  
disorder Electrocardiogram QT prolonged Electrocardiogram ST  
segment depression Electrocardiogram abnormal Electrocardiogram  
change Electrolyte imbalance Embolism Emotional disorder  
Emotional distress Encephalopathy Endocarditis  
Endocrine disorder Endometrial sarcoma Energy increased  
Enterocolitis Eosinophil count increased Eosinophilia  
Eosinophilic pneumonia Epistaxis Erectile dysfunction

Eructation Erysipelas Erythema Erythema multiforme  
 Euphoric mood Eustachian tube disorder Exostosis  
 Extrapyrarnidal disorder Extrasystoles Eye disorder  
 Eye haemorrhage Eye pain Eye swelling Eyelid disorder  
 Eyelid ptosis Face oedema Faecal incontinence Faecalith  
 Faecaloma Faeces discoloured Fasciitis Fatigue Fear  
 Feeling abnormal Feeling cold Feeling drunk Feeling hot  
 Feeling jittery Feeling of body temperature change Flank pain  
 Flat affect Flatulence Fluid retention Flushing Frequent  
 bowel movements Fungal infection Gait disturbance Galactorrhoea  
 Gamma-glutamyltransferase increased Gastric atony  
 Gastric disorder Gastritis Gastroenteritis Gastrointestinal  
 disorder Gastrointestinal haemorrhage Gastrointestinal infection  
 Gastrointestinal motility disorder Gastrointestinal pain  
 Gastrointestinal tract irritation Gastrooesophageal reflux  
 disease Generalised oedema Gingival bleeding Gingival pain  
 Gingival ulceration Gingivitis Glossitis Glossodynia Gout  
 Grand mal convulsion Granuloma Groin pain Gynaecomastia  
 HIV infection Haematemesis Haematochezia Haematocrit  
 decreased Haematocrit increased Haematoma Haematuria Haemoglobin  
 decreased Haemoglobin increased Haemolytic anaemia Haemoptysis  
 Haemorrhage Haemorrhoids Hair disorder Hallucination  
 Hangover Headache Hearing impaired Heat rash  
 Helicobacter infection Hemiplegia Hepatic enzyme increased  
 Hepatic failure Hepatic function abnormal Hepatic steatosis  
 Hepatitis Hepatitis C Hepatobiliary disease Hepatocellular  
 injury Hepatomegaly Hepatorenal syndrome Hernia  
 Herpes simplex Herpes virus infection Herpes zoster  
 Hiccups High density lipoprotein decreased Hordeolum  
 Hormone level abnormal Hostility Hot flush Hydronephrosis  
 Hyperacusis Hyperaesthesia Hypercalcaemia Hypercalciuria  
 Hypercapnia Hypercholesterolaemia Hyperglycaemia  
 Hyperhidrosis Hyperkalaemia Hyperkeratosis  
 Hyperkinesia Hyperlipidaemia Hyperpathia Hyperpyrexia  
 Hyperreflexia Hypersensitivity Hypertension Hypertonia  
 Hypertriglyceridaemia Hypertrophy Hyperuricaemia  
 Hyperventilation Hypoaesthesia Hypoalbuminaemia  
 Hypocalcaemia Hypoglycaemia Hypogonadism  
 Hypokalaemia Hypokinesia Hypomagnesaemia Hypomania  
 Hyponatraemia Hypophosphataemia Hypopnoea Hypoproteinaemia  
 Hyporeflexia Hypotension Hypothermia Hypothyroidism  
 Hypotonia Hypoventilation Hypovolaemia Hypovolaemic  
 shock Hypoxia Idiopathic thrombocytopenic purpura Ileus  
 paralytic Ill-defined disorder Immune system disorder Impaired  
 gastric emptying Impaired healing Inappropriate antidiuretic hormone  
 secretion Incontinence Increased appetite Increased  
 bronchial secretion Induration Infarction Infection Infestation  
 Inflammation Influenza Influenza like illness Infusion  
 site reaction Ingrowing nail Injection site haematoma  
 Injection site haemorrhage Injection site pain Injection  
 site reaction Injection site urticaria Insomnia  
 Interstitial lung disease Intestinal functional disorder  
 Intestinal obstruction Intestinal perforation Intra-uterine  
 death Intracranial aneurysm Intracranial pressure increased  
 Intraocular pressure increased Iron deficiency Iron

deficiency anaemia Irritability Irritable bowel syndrome  
 Ischaemia Ischaemic stroke Jaundice Jaundice cholestatic  
 Joint crepitation Joint stiffness Joint swelling  
 Labyrinthitis Lacrimal disorder Lacrimation increased Large  
 intestinal haemorrhage Large intestine perforation Laryngeal oedema  
 Laryngitis Laryngospasm Leiomyoma Lethargy  
 Leukocytosis Leukopenia Libido decreased Libido increased  
 Light anaesthesia Lip blister Lip pain Lip ulceration Liver  
 function test abnormal Liver injury Liver tenderness Localised  
 infection Loss of consciousness Low density lipoprotein increased  
 Lung disorder Lymphadenitis Lymphadenopathy Lymphocyte  
 count decreased Lymphocyte count increased Lymphoedema Lymphoma  
 Lymphopenia Malaise Mammogram abnormal Mania Mediastinal  
 disorder Megacolon Melaena Memory impairment Menometrorrhagia  
 Menopausal symptoms Menopause Menstrual disorder  
 Menstruation irregular Mental disability Mental disorder  
 Mental retardation Mental status changes Metabolic  
 acidosis Metastases to central nervous system Metastasis  
 Micturition disorder Micturition urgency Migraine  
 Miosis Monocyte count increased Mood swings Mouth  
 ulceration Mucosal inflammation Mucous membrane disorder  
 Muscle contractions involuntary Muscle relaxant therapy  
 Muscle rigidity Muscle spasms Muscle spasticity Muscle  
 twitching Muscular weakness Musculoskeletal chest pain  
 Musculoskeletal discomfort Musculoskeletal disorder  
 Musculoskeletal pain Musculoskeletal stiffness Myalgia  
 Mydriasis Myocardial infarction Myocardial ischaemia  
 Myoclonus Myopathy Nasal congestion Nasal discomfort Nasal  
 oedema Nasopharyngitis Nausea Neck pain Necrosis  
 Neoplasm Neoplasm malignant Nephrolithiasis Nervous  
 system disorder Nervousness Neuralgia Neuroleptic malignant  
 syndrome Neuropathy peripheral Neutropenia Neutrophil count  
 decreased Neutrophil count increased Night sweats Nightmare  
 Nocturia Nodule Nuchal rigidity Nystagmus Obsessive-  
 compulsive disorder Obstruction Obstructive airways disorder  
 Oculogyric crisis Oedema peripheral Oesophageal disorder  
 Oesophageal stenosis Oesophagitis Oliguria Oral  
 candidiasis Oral herpes Oral pain Oropharyngeal discomfort  
 Oropharyngeal pain Orthostatic hypotension  
 Osteoarthritis Osteopenia Osteoporosis Otitis externa  
 Otitis media Oxygen saturation decreased Pain in extremity  
 Pallor Palpitations Pancreatitis Pancreatitis  
 acute Pancytopenia Panic attack Panic reaction Papule  
 Paraesthesia Paralysis Paranoia Paresis Parosmia  
 Parotid gland enlargement Pathological fracture Pelvic pain  
 Pericarditis Peripheral coldness Peripheral ischaemia  
 Peripheral vascular disorder Perirectal abscess Peroneal  
 nerve palsy Persistent generalised lymphadenopathy Personality  
 disorder Petechiae Pharyngitis Pharyngitis streptococcal  
 Phlebitis Photophobia Photopsia Photosensitivity reaction  
 Piloerection Plantar fasciitis Platelet count decreased  
 Pleural disorder Pleural effusion Pneumonia Pneumothorax  
 Poisoning Pollakiuria Polyp Polyuria Poor peripheral  
 circulation Poor quality sleep Post procedural complication Post  
 procedural haemorrhage Post procedural infection Premenstrual

syndrome Presyncope Procedural pain Proctalgia Productive cough  
 Prolonged labour Prostatic disorder Prostatitis  
 Prostatomegaly Protein total decreased Protein urine  
 present Proteinuria Prurigo Pruritus Pruritus generalised  
 Pruritus genital Pseudolymphoma Psychomotor retardation  
 Psychotic disorder Pulmonary congestion Pulmonary  
 embolism Pulmonary function test decreased Pulmonary oedema  
 Purpura Pyelonephritis Rales Rash Rash erythematous Rash  
 maculo-papular Rash papular Rash pustular Rectal  
 haemorrhage Rectal prolapse Red blood cell count decreased Red  
 blood cell count increased Red blood cell sedimentation rate  
 increased Reflux oesophagitis Regurgitation Renal failure  
 Renal impairment Renal pain Respiration abnormal Respiratory  
 acidosis Respiratory arrest Respiratory depression Respiratory  
 disorder Respiratory distress Respiratory failure Respiratory  
 rate decreased Respiratory tract congestion Respiratory tract  
 infection viral Retching Retinal artery occlusion Rheumatoid  
 arthritis Rhinalgia Rhinitis Rhinitis allergic Rhinitis seasonal  
 Rhinorrhoea Rhonchi Rosacea Salivary hypersecretion  
 Scleral haemorrhage Scrotal oedema Seasonal allergy  
 Seborrhoeic dermatitis Sedation Sensory loss Sepsis  
 Sexual dysfunction Shock Sinus congestion Sinus headache  
 Sinus tachycardia Sinusitis Skin discolouration Skin  
 disorder Skin hyperpigmentation Skin lesion Skin reaction Skin  
 ulcer Sleep apnoea syndrome Sleep disorder Sluggishness Small  
 intestinal obstruction Sneezing Social avoidant behaviour  
 Somnolence Speech disorder Sputum increased Sticky skin  
 Stomatitis Strabismus Stridor Stupor Subdural  
 haematoma Suicidal ideation Suicide attempt Supraventricular  
 tachycardia Swelling Syncope Synovial cyst Synovitis  
 Systemic lupus erythematosus Tachycardia Tardive dyskinesia  
 Tearfulness Tenderness Tendon disorder Tendonitis Tension  
 Testicular swelling Thinking abnormal Thirst Thought  
 blocking Throat irritation Throat tightness Thrombocytopenia  
 Thrombocytopenic purpura Thrombocytosis Thrombophlebitis  
 Thrombosis Thyroid neoplasm Tinea pedis Tinnitus Tongue  
 discolouration Tongue disorder Tongue oedema Tooth abscess  
 Tooth disorder Tooth impacted Tooth infection Tooth loss  
 Toothache Torsade de pointes Toxic epidermal necrolysis  
 Tracheitis Tremor Tumour invasion Ulcer Upper respiratory  
 tract infection Upper-airway cough syndrome Urethral disorder  
 Urinary hesitation Urinary incontinence Urinary retention  
 Urinary tract disorder Urinary tract infection Urine  
 abnormality Urine analysis abnormal Urine output increased  
 Urogenital disorder Urticaria Uterine leiomyoma  
 Uterovaginal prolapse VIIIth nerve paralysis Vaginal cyst  
 Vaginal discharge Vaginal haemorrhage Vaginal infection  
 Vaginal inflammation Vascular insufficiency Vascular purpura  
 Vasodilation procedure Venous thrombosis Ventricular  
 extrasystoles Ventricular fibrillation Ventricular  
 tachycardia Vertigo Viral diarrhoea Viral infection Vision  
 blurred Visual acuity reduced Visual impairment Vomiting  
 Weight decreased Weight increased Wheezing White blood cell  
 count increased Withdrawal syndrome Wound haemorrhage Wound  
 infection Yawning



\*\*\*\*\*  
\*\*\*\*\*

Glycine receptor subunit alpha-2 - Group: Channel

Treated with:

glycine: approved, nutraceutical small molecule (38 associated side effects) Supplemental glycine may have antispastic activity. Very early findings suggest it may also have antipsychotic activity as well as antioxidant and anti-inflammatory activities.

lindane: approved small molecule (9 associated side effects)

For the treatment of patients infested with *Sarcoptes scabiei* or pediculosis capitis who have either failed to respond to adequate doses, or are intolerant of other approved therapies.

picROTOXIN: approved small molecule (0 associated side effects)

Used internally for relieving respiratory distress. Also for use as an antidote in poisoning by CNS depressants, especially barbiturates.

ethanol: approved small molecule (11 associated side effects)

For therapeutic neurolysis of nerves or ganglia for the relief of intractable chronic pain in such conditions as inoperable cancer and trigeminal neuralgia (tic douloureux), in patients for whom neurosurgical procedures are contraindicated.

52 known side effects mediated through drugs targeting this protein:

Acidosis Agitation Alopecia Angina pectoris Back pain  
Blindness Blindness transient Chills Coma Convulsion  
Cranial nerve paralysis Dehydration Dermatitis contact  
Diarrhoea Dizziness Dry mouth Electrolyte imbalance  
Encephalopathy Erectile dysfunction Fluid overload  
Headache Hyperaesthesia Hyperammonaemia Hyperkinesia  
Hypersensitivity Hyponatraemia Hypotension Incontinence  
Lung disorder Meningitis Nausea Neuritis Neuropathy  
peripheral Oedema Pain Paraesthesia Paralysis Polyuria  
Pruritus Pulmonary congestion Respiratory tract congestion  
Rhinitis Salivary hypersecretion Synovial cyst  
Tachycardia Thirst Thrombophlebitis Urinary retention  
Urticaria Vertigo Visual impairment Vomiting

\*\*\*\*\*  
\*\*\*\*\*

Sigma 1-type opioid receptor - Group: Receptor

Treated with:

remoxipride: approved, withdrawn small molecule (0 associated side effects) Remoxipride is an atypical antipsychotic once used for the treatment of schizophrenia.

dextromethorphan: approved small molecule (0 associated side effects) For treatment and relief of dry cough.

pentazocine: approved small molecule (51 associated side effects) For the relief of moderate to severe pain.

dimethyltryptamine: illicit, experimental small molecule (0 associated side effects) Some people use this compound as a psychedelically inducing agent.

phencyclidine: illicit, experimental small molecule (0 associated side effects)

51 known side effects mediated through drugs targeting this protein:

Agitation Apnoea Asthenia Chills Confusional state  
 Constipation Dependence Dermatitis Diarrhoea Diplopia  
 Disorientation Dizziness Drug dependence Dry mouth  
 Dysgeusia Dyspnoea Eosinophilia Euphoric mood Face  
 oedema Feeling abnormal Flushing Hallucination Headache  
 Hyperhidrosis Hypersensitivity Hypertension Induration  
 Insomnia Irritability Loss of consciousness Miosis  
 Muscle spasms Nausea Nodule Nystagmus Oedema  
 Paraesthesia Pruritus Pulmonary function test decreased  
 Respiratory depression Sedation Shock Syncope Tachycardia  
 Tinnitus Toxic epidermal necrolysis Tremor Ulcer  
 Urinary retention Vision blurred Vomiting

\*\*\*\*\*  
 \*\*\*\*\*

G protein-activated inward rectifier potassium channel 1 - Group:  
 Channel

Treated with:

halothane: approved small molecule (10 associated side effects)  
 For the induction and maintenance of general anesthesia

10 known side effects mediated through drugs targeting this protein:  
 Arrhythmia Cardiac arrest Chills Hepatic necrosis  
 Hyperpyrexia Hypotension Nausea Necrosis Respiratory  
 arrest Vomiting

\*\*\*\*\*  
 \*\*\*\*\*

Gamma-aminobutyric acid receptor subunit gamma-2 - Group: Channel

Treated with:

lorazepam: approved small molecule (126 associated side effects)  
 For the management of anxiety disorders, and for treatment of status epilepticus.

temazepam: approved small molecule (35 associated side effects)  
 For the short-term treatment of insomnia (generally 7-10

days).

clobazam: illicit, approved small molecule (58 associated side effects)  
 For treatment and management of epilepsy and anxiety disorder.

alprazolam: illicit, approved small molecule (178 associated side effects)  
 For the management of anxiety disorder or the short-term relief of symptoms of anxiety and for the treatment of panic disorder, with or without agoraphobia.

chlordiazepoxide: illicit, approved small molecule (20 associated side effects)  
 For the management of anxiety disorders or for the short-term relief of symptoms of anxiety, withdrawal symptoms of acute alcoholism, and preoperative apprehension and anxiety.

adinazolam: approved small molecule (0 associated side effects)  
 For the treatment of anxiety and status epilepticus.

clorazepate: illicit, approved small molecule (0 associated side effects)  
 For the management of anxiety disorders or for the short-term relief of the symptoms of anxiety. Also used as adjunctive therapy in the management of partial seizures and for the symptomatic relief of acute alcohol withdrawal.

midazolam: illicit, approved small molecule (119 associated side effects)  
 For use as a sedative perioperatively.

flurazepam: illicit,approved small molecule (62 associated side effects) For short-term and intermittent use in patients with recurring insomnia and poor sleeping habits

halazepam: illicit,approved small molecule (0 associated side effects) Used to relieve anxiety, nervousness, and tension associated with anxiety disorders.

diazepam: illicit,approved small molecule (149 associated side effects) Used in the treatment of severe anxiety disorders, as a hypnotic in the short-term management of insomnia, as a sedative and premedicant, as an anticonvulsant, and in the management of alcohol withdrawal syndrome.

oxazepam: approved small molecule (36 associated side effects) For the treatment of anxiety disorders and alcohol withdrawal.

triazolam: illicit,approved,withdrawn small molecule (66 associated side effects) For the short-term treatment of insomnia.

clonazepam: illicit,approved small molecule (228 associated side effects) Used as an anticonvulsant in the treatment of the Lennox-Gastaut syndrome (petit mal variant), akinetic and myoclonic seizures.

estazolam: illicit,approved small molecule (131 associated side effects) For the short-term management of insomnia characterized by difficulty in falling asleep, frequent nocturnal awakenings, and/or early morning awakenings.

ginkgo biloba: approved,nutraceutical small molecule (0 associated side effects) Appears to be effective in: alleviating age-related memory impairment in some elderly people with mild to moderate age-related memory or cognitive impairment; improving cognitive function in healthy young to middle-aged people; improving symptoms of Alzheimer's, vascular or mixed dementia; improving damage to the visual field in patients with normal tension glaucoma; decreasing the number of painful attacks in patients with Raynaud's syndrome; and may improve symptoms of vertigo and dizziness in some patients.

bromazepam: illicit,approved small molecule (47 associated side effects) For the short-term treatment of insomnia, short-term treatment of anxiety or panic attacks, if a benzodiazepine is required, and the alleviation of the symptoms of alcohol- and opiate-withdrawal.

clotiazepam: illicit,approved small molecule (0 associated side effects) For the treatment of anxiety disorders.

fludiazepam: illicit,approved small molecule (0 associated side effects) Used for the short-term treatment of anxiety disorders.

prazepam: illicit,approved small molecule (0 associated side effects) For the treatment of anxiety disorders.

quazepam: illicit,approved small molecule (0 associated side effects) Used to treat insomnia.

cinolazepam: approved small molecule (0 associated side effects) For the management of anxiety disorders or for the short-term relief of the symptoms of anxiety or anxiety associated with depressive symptoms.

nitrazepam: approved small molecule (44 associated side effects) Used to treat short-term sleeping problems (insomnia), such as

difficulty falling asleep, frequent awakenings during the night, and early-morning awakening.

486 known side effects mediated through drugs targeting this protein:

Abdominal discomfort Abdominal distension Abdominal pain  
Abnormal dreams Abnormal faeces Acidosis Acne Affect  
labiality Ageusia Aggression Agitation Agranulocytosis  
Akathisia Akinesia Alcohol poisoning Alopecia Altered  
state of consciousness Amblyopia Amnesia Anaemia  
Anaphylactic shock Anaphylactoid reaction Anger Angioedema  
Angiopathy Anorectal discomfort Anorectal disorder  
Anterograde amnesia Anxiety Aortic dissection Apathy  
Aphonia Apnoea Appetite disorder Arrhythmia Arterial  
spasm Arthralgia Arthritis Aspartate aminotransferase increased  
Aspiration Asthenia Asthma Ataxia Athetosis  
Atrioventricular block Back pain Balance disorder Bladder  
dysfunction Bladder pain Blindness Blood alkaline phosphatase  
increased Blood bilirubin increased Blood disorder Blood  
glucose decreased Blood thromboplastin decreased Body temperature  
decreased Body temperature increased Borderline personality  
disorder Bradycardia Bradyphrenia Brain oedema Breast  
disorder Breast pain Breast swelling Bronchitis Bronchospasm  
Candidiasis Carbon dioxide increased Cardiac arrest  
Cardiac disorder Cardiac failure Cardio-respiratory arrest  
Cardiovascular disorder Cellulitis Cerebellar syndrome  
Chest discomfort Chest pain Chills Choking sensation  
Chorea Chromaturia Clonic convulsion Clonus Clumsiness  
Coagulopathy Cognitive disorder Coma Completed suicide  
Confusional state Connective tissue disorder Constipation  
Conversion disorder Convulsion Coordination abnormal Cough  
Cyanosis Cystitis Cystitis noninfective Cytolytic  
hepatitis Deafness Death Decreased appetite Dehydration  
Delirium Delirium tremens Delusion Dependence  
Depersonalisation Depressed level of consciousness Depressed  
mood Depression Depressive symptom Derealisation Dermatitis  
Dermatitis contact Dermatitis exfoliative Diarrhoea  
Diplopia Discomfort Disinhibition Disorientation  
Disturbance in attention Disturbance in sexual arousal  
Dizziness Drooling Drug abuse Drug dependence Drug  
eruption Drug intolerance Drug withdrawal convulsions Dry mouth  
Dry skin Dysaesthesia Dysarthria Dysgeusia Dyskinesia  
Dysmenorrhoea Dyspepsia Dysphagia Dysphonia Dysphoria  
Dyspnoea Dysthymic disorder Dystonia Dysuria Ear  
infection Ear pain Ecchymosis Effusion Ejaculation delayed  
Ejaculation failure Emotional disorder Emotional  
distress Emotional poverty Encephalopathy Encopresis Endometrial  
sarcoma Energy increased Enterocolitis Enuresis  
Eosinophilia Epilepsy Epistaxis Erectile dysfunction  
Erythema Erythema multiforme Euphoric mood  
Extrapyramidal disorder Extrasystoles Eye disorder  
Eye irritation Eye movement disorder Eye pain Eye  
swelling Face oedema Faecal incontinence Fatigue Feeling  
abnormal Feeling cold Feeling drunk Feeling hot Feeling  
jittery Feeling of body temperature change Flat affect Flatulence

Floppy infant      Flushing      Fungal infection      Gait disturbance  
 Galactorrhoea      Gangrene      Gastric disorder      Gastritis  
 Gastrointestinal disorder      Gastrointestinal haemorrhage  
 Gastrointestinal pain      Gingival pain      Glossitis      Glossodynia  
 Gout      Grand mal convulsion      Gynaecomastia      Haematoma  
 Haematuria      Haemoglobin      Haemoglobin decreased      Haemorrhage  
 Haemorrhage urinary tract      Haemorrhoids      Hallucination  
 Hangover      Headache      Hearing impaired      Heart rate irregular  
 Hemiparesis      Hepatic enzyme increased      Hepatic failure  
 Hepatic function abnormal      Hepatitis      Hepatocellular injury  
 Hepatomegaly      Herpes simplex      Herpes virus infection  
 Hiccups      Hirsutism      Homicidal ideation      Hordeolum  
 Hostility      Hunger      Hypercapnia      Hyperhidrosis  
 Hyperkinesia      Hyperprolactinaemia      Hypersensitivity  
 Hypersomnia      Hypertension      Hypertonia      Hyperventilation  
 Hypoaesthesia      Hypochromic anaemia      Hypokinesia      Hypomania  
 Hyponatraemia      Hypopnoea      Hyporeflexia      Hypotension  
 Hypothermia      Hypotonia      Hypoventilation      Hypoxia      Ill-defined  
 disorder      Illusion      Inappropriate antidiuretic hormone secretion  
 Incontinence      Increased appetite      Induration      Infection  
 Infectious mononucleosis      Infestation      Inflammation  
 Influenza      Injection site pain      Injection site reaction  
 Insomnia      Intraocular pressure increased      Irritability  
 Jaundice      Joint swelling      Laryngitis      Laryngospasm  
 Lethargy      Leukocytosis      Leukopenia      Libido decreased  
 Libido increased      Liver function test abnormal      Liver injury  
 Local reaction      Logorrhoea      Loss of consciousness      Loss of  
 libido      Lung disorder      Lymphadenopathy      Major depression  
 Malaise      Mania      Mean arterial pressure      Mediastinal disorder  
 Melaena      Memory impairment      Menstrual disorder  
 Menstruation irregular      Mental disability      Mental disorder  
 Mental retardation      Micturition urgency      Migraine  
 Miosis      Mood swings      Motion sickness      Movement disorder  
 Muscle relaxant therapy      Muscle rigidity      Muscle spasms  
 Muscle spasticity      Muscle twitching      Muscular weakness  
 Musculoskeletal discomfort      Musculoskeletal disorder  
 Musculoskeletal stiffness      Myalgia      Mydriasis      Myoclonus  
 Nasal congestion      Nasopharyngitis      Nausea      Neck pain  
 Necrosis      Nervous system disorder      Nervousness      Neuritis  
 Neuroleptic malignant syndrome      Neuropathy peripheral  
 Neutropenia      Nightmare      Nocturia      Nodal rhythm      Nodule  
 Nystagmus      Obstruction      Obstructive airways disorder      Oedema  
 Oedema peripheral      Oliguria      Oropharyngeal pain      Orthostatic  
 hypotension      Osteoarthritis      Otitis media      Pain      Pain in extremity  
 Pain in jaw      Pallor      Palpitations      Pancytopenia  
 Paraesthesia      Paraesthesia oral      Paralysis      Paresis  
 Pelvic pain      Penile discharge      Pericardial effusion      Periorbital  
 oedema      Personality disorder      Phaeochromocytoma      Pharyngitis  
 Phlebitis      Photophobia      Photosensitivity reaction  
 Pigmentation disorder      Platelet count decreased      Pleurisy  
 Pneumonia      Pneumothorax      Pollakiuria      Polyuria      Post-  
 traumatic stress disorder      Precocious puberty      Premenstrual  
 syndrome      Presyncope      Proctalgia      Prothrombin level increased  
 Pruritus      Psychomotor retardation      Psychotic disorder  
 Puberty      Pulmonary congestion      Pulmonary function test

decreased Pulmonary haemorrhage Pulmonary hypertension Pulmonary  
 oedema Purpura Rash Rash maculo-papular Rectal  
 haemorrhage Rectal tenesmus Renal failure Respiratory arrest  
 Respiratory depression Respiratory disorder Respiratory  
 failure Respiratory moniliiasis Respiratory rate decreased  
 Respiratory tract congestion Respiratory tract infection  
 Retching Retrograde amnesia Rhinitis allergic Rhinorrhoea  
 Rhonchi Salivary hypersecretion Scotoma Sedation  
 Sexual dysfunction Shock Sinus tachycardia Sinusitis Skin  
 burning sensation Skin discolouration Skin disorder Skin  
 exfoliation Skin necrosis Sleep apnoea syndrome Sleep disorder  
 Sleep talking Sluggishness Sneezing Somnambulism  
 Somnolence Speech disorder Stevens-Johnson syndrome  
 Stomatitis Strabismus Stridor Stupor Substance abuse  
 Suicidal ideation Swelling Swelling face Swollen tongue  
 Syncope Tachycardia Tachypnoea Tenderness Tendonitis  
 Tension Therapeutic response decreased Thinking abnormal  
 Thirst Thrombocytopenia Thrombocytosis Thrombophlebitis  
 Thrombosis Thyroid neoplasm Tinnitus Tongue coated  
 Tongue disorder Tongue oedema Tooth disorder Toothache  
 Toxic epidermal necrolysis Transaminases increased  
 Tremor Tropical spastic paresis Ulcer Upper airway  
 obstruction Upper respiratory tract infection Urethral disorder  
 Urinary hesitation Urinary incontinence Urinary retention  
 Urinary tract disorder Urinary tract infection Urine  
 colour abnormal Urine output increased Urticaria Vaginal discharge  
 Vaginal infection Vaginal inflammation Vascular purpura  
 Vasodilation procedure Venous thrombosis Ventricular arrhythmia  
 Ventricular extrasystoles Vertigo Viral infection  
 Vision blurred Visual acuity reduced Visual impairment  
 Vomiting Weight decreased Weight increased Wheezing  
 Withdrawal syndrome Xeroderma Xerophthalmia Yawning

\*\*\*\*\*  
 \*\*\*\*\*

Voltage-dependent calcium channel gamma-1 subunit - Group: Channel  
 Treated with:  
 ibutilide: approved small molecule (53 associated side effects)  
 Indicated for the rapid conversion of atrial fibrillation or  
 atrial flutter of recent onset to sinus rhythm.  
 diltiazem: approved small molecule (213 associated side  
 effects) For the treatment of Hypertension  
 lercanidipine: approved small molecule (0 associated side  
 effects) For the treatment of Hypertension, management of angina  
 pectoris and Raynaud's syndrome  
 magnesium sulfate: approved small molecule (0 associated  
 side effects) Used for immediate control of life-threatening  
 convulsions in the treatment of severe toxemias (pre-eclampsia and  
 eclampsia) of pregnancy and in the treatment of acute nephritis in  
 children. Also indicated for replacement therapy in magnesium  
 deficiency, especially in acute hypomagnesemia accompanied by signs  
 of tetany similar to those of hypocalcemia. Also used in uterine  
 tetany as a myometrial relaxant.  
 nitrendipine: approved small molecule (0 associated side  
 effects) For the treatment of mild to moderate hypertension

fluspirilene: approved small molecule (0 associated side effects) Used for the treatment of schizophrenia.

229 known side effects mediated through drugs targeting this protein:

Abdominal distension Abdominal pain Abnormal dreams Acute coronary syndrome Acute generalised exanthematous pustulosis  
Albuminuria Alopecia Amblyopia Amnesia Anaemia  
Angioedema Angiopathy Aortic dissection Arthralgia Arthropathy  
Aspartate aminotransferase increased Asthenia  
Atrioventricular block first degree Atrioventricular block second degree  
Bladder pain Bleeding time prolonged Blood creatine phosphokinase increased  
Blood creatinine increased Blood urea increased Blood uric acid increased  
Body temperature increased Bone pain Bradycardia Bronchitis Bundle branch block  
Bursitis Cardiac arrest Cardiac disorder Cardiac failure Cardiac failure congestive  
Cardiac index Cerebrovascular accident Chest pain Colitis Conduction disorder Confusional state  
Conjunctivitis Constipation Cough Crystal urine Crystalluria Cystitis  
Cystitis noninfective Decreased appetite Dermatitis contact Dermatitis exfoliative  
Diarrhoea Diplopia Discomfort Dissociation Dizziness Drug interaction Dry mouth  
Dysgeusia Dysmenorrhoea Dyspepsia Dyspnoea Ear infection Ear pain Ecchymosis  
Electrocardiogram PR prolongation Electrocardiogram ST segment elevation  
Endophthalmitis Epistaxis Erectile dysfunction Eructation Erythema  
Erythema multiforme Extrapyrarnidal disorder Extrasystoles Eye disorder  
Eye haemorrhage Eye irritation Face oedema Fatigue Feeling abnormal Feeling jittery  
Flatulence Flushing Gait disturbance Gastric disorder Gastric ulcer  
Gastrointestinal disorder Gastrointestinal haemorrhage Gingival hyperplasia  
Gout Gynaecomastia Haemoglobin decreased Haemolytic anaemia Haemorrhage  
Hallucination Headache Hyperglycaemia Hyperhidrosis Hyperkeratosis  
Hyperplasia Hypersensitivity Hypertension Hypertonia Hypertrophy  
Hyperuricaemia Hypotension Ill-defined disorder Infarction Infection  
Influenza Injection site reaction Insomnia Ischaemia Joint swelling  
Left ventricular dysfunction Lethargy Leukocytoclastic vasculitis Leukocytosis  
Leukopenia Lichenoid keratosis Liver function test abnormal Local swelling  
Loss of consciousness Lymphadenopathy Malaise Mediastinal disorder  
Melanocytic naevus Mental disability Muscle rigidity Muscle spasms  
Musculoskeletal discomfort Musculoskeletal stiffness Myalgia Myocardial infarction  
Myocardial ischaemia Myopathy Nasal congestion Nasopharyngitis Nausea Neck pain  
Nephrolithiasis Nervous system disorder Nervousness Neuropathy peripheral  
Nocturia Nodal arrhythmia Nodal rhythm Nuchal rigidity Oedema Oedema peripheral  
Orthostatic hypotension Osteoarthritis Otitis media Pain Pallor Palpitations  
Panophthalmitis Paraesthesia Periorbital oedema Personality change  
Petechiae Pharyngitis Phlebitis Photosensitivity reaction Platelet disorder  
Pollakiuria Polyuria Prostatic disorder Pruritus Purpura Pyelonephritis  
Rash generalised Renal failure Respiratory

disorder    Respiratory distress    Respiratory tract infection  
             Retinal disorder Rhinitis    Rhythm idioventricular Shock Sick  
 sinus syndrome    Sinus arrest    Sinus arrhythmia Sinus bradycardia  
             Sinus congestion Sinus headache    Sinus tachycardia Sinusitis  
             Skin hyperpigmentation Skin hypertrophy Somnolence  
             Supraventricular extrasystoles    Supraventricular tachycardia  
             Swelling    Syncope    Tachyarrhythmia    Tension    Thinking  
 abnormal    Thirst    Thrombocytopenia Tinnitus    Tooth disorder  
             Toxic epidermal necrolysis    Tremor    Ulcer Unevaluable event  
             Upper respiratory tract infection Urethral disorder Urinary  
 tract disorder    Urinary tract infection    Urine output increased  
             Urticaria    Vaginal infection Vaginal inflammation    Vascular  
 purpura    Vascular resistance systemic Vasculitis    Vasodilation  
 procedure    Ventricular arrhythmia Ventricular dysfunction  
             Ventricular extrasystoles    Ventricular fibrillation  
             Ventricular tachycardia    Vertigo    Vision blurred  
             Vitreous floaters Vomiting    Weight increased

\*\*\*\*\*  
 \*\*\*\*\*

Retinoic acid receptor beta - Group: Receptor

Treated with:

adapalene: approved    small molecule    (35 associated side effects)  
             For the topical treatment of comedo, papular and pustular acne  
 (acne vulgaris) of the face, chest or back.  
 acitretin: approved    small molecule    (165 associated side  
 effects)    For the treatment of severe psoriasis in adults.  
 alitretinoin: approved    small molecule    (0 associated side  
 effects)    For topical treatment of cutaneous lesions in patients  
 with AIDS-related Kaposi's sarcoma.  
 tazarotene: approved    small molecule    (23 associated side effects)  
             Used to treat psoriasis, acne and sun damaged skin  
 (photodamage).  
 etretinate: withdrawn    small molecule    (0 associated side effects)  
             For the treatment of severe psoriasis in adults.  
 ttnpb:    experimental    small molecule    (0 associated side  
 effects)  
 tamibarotene: approved    small molecule    (0 associated side  
 effects)    Investigated for use/treatment in leukemia (unspecified).

195 known side effects mediated through drugs targeting this protein:

Abdominal pain    Acne    Ageusia    Alcohol intolerance    Alopecia  
             Angioedema    Anorectal discomfort    Anorectal disorder  
             Arthralgia    Arthritis    Arthropathy    Asthenia    Atopy    Atrophy  
             Back pain    Balanoposthitis    Benign intracranial hypertension  
             Bleeding time prolonged    Blepharitis    Blister    Blood  
 creatinine increased    Blood triglycerides increased    Blood uric  
 acid increased    Body temperature increased    Bone pain    Burning  
 sensation    Bursitis    Calcinosis    Candidiasis    Cataract    subcapsular  
             Cerumen impaction    Chapped lips    Cheilitis    Chest pain  
             Chills    Cold sweat    Congenital eye disorder  
             Conjunctivitis    Constipation    Convulsion    Corneal  
 neovascularisation    Cough    Crocodile tears syndrome    Deafness  
             Decreased appetite    Dermatitis atopic    Dermatitis bullous  
             Dermatitis contact    Diarrhoea    Discomfort    Dry eye    Dry



mouth Dry skin Dysgeusia Dyspepsia Dysphonia Dysuria Ear  
infection Ear pain Eczema Epistaxis Erectile dysfunction  
Erythema Exostosis Eye disorder Eye irritation Eye  
pain Eyelid oedema Face oedema Facial pain Fatigue Febrile  
neutropenia Feeling abnormal Flushing Foetal disorder Gait  
disturbance Gastrointestinal pain Genital discharge Gingival bleeding  
Gingivitis Glossitis Granuloma Haemoglobin Haemorrhage Hair  
texture abnormal Headache Hepatitis Herpes simplex Herpes  
virus infection High density lipoprotein decreased Hordeolum Hot  
flush Hyperaesthesia Hypercholesterolaemia Hyperhidrosis  
Hyperlipidaemia Hypersensitivity Hypertonia  
Hypertriglyceridaemia Hypertrophy Hypervitaminosis  
Hypervitaminosis A Hypoaesthesia Ill-defined disorder  
Impaired healing Increased appetite Infection  
Inflammation Insomnia Interstitial lung disease  
Iritis Jaundice Keratitis Lacrimation decreased  
Lacrimation increased Laryngitis Lip dry Lip swelling  
Liver function test abnormal Localised oedema Madarosis  
Malaise Mass Melaena Menopausal symptoms Mouth  
ulceration Muscle spasms Muscular weakness Musculoskeletal  
discomfort Myalgia Nasal dryness Nausea Nervousness  
Neutropenia Nodule Oedema Oedema peripheral Optic  
neuritis Osteoarthritis Otitis externa Pain Pancreatitis  
Pancytopenia Papilloedema Pharyngitis Photophobia  
Photosensitivity reaction Proctalgia Pruritus Purpura  
Pyogenic granuloma Rash Rash vesicular Rectal tenesmus  
Retinal haemorrhage Rhinitis Saliva altered Salivary  
hypersecretion Scab Scotoma Seborrhoeic dermatitis  
Sensitisation Sinusitis Skin atrophy Skin  
discolouration Skin disorder Skin exfoliation Skin fissures  
Skin hyperpigmentation Skin hypertrophy Skin irritation Skin  
mass Skin oedema Skin ulcer Somnolence Sticky skin Stomatitis  
Swelling Tension Thirst Tinnitus Tongue ulceration  
Ulcer Urinary tract infection Urine abnormality Urine  
analysis abnormal Urticaria Vascular purpura Vasculitis Vision  
blurred Visual acuity reduced Vulvovaginitis Weight decreased  
White blood cell count decreased Xerophthalmia

\*\*\*\*\*  
\*\*\*\*\*

Large neutral amino acids transporter small subunit 2 - Group:

Transporter

Treated with:

l-phenylalanine: approved, nutraceutical small molecule (0 associated side effects) L-phenylalanine may be helpful in some with depression. It may also be useful in the treatment of vitiligo. There is some evidence that L-phenylalanine may exacerbate tardive dyskinesia in some schizophrenic patients and in some who have used neuroleptic drugs.

l-glutamine: approved, nutraceutical small molecule (0 associated side effects) Used for nutritional supplementation, also for treating dietary shortage or imbalance.

l-alanine: approved, nutraceutical small molecule (0 associated side effects) Used for protein synthesis.

known side effects mediated through drugs targeting this protein:

\*\*\*\*\*  
\*\*\*\*\*

Choline transporter-like protein 2 - Group: Transporter

Treated with:

choline: approved, nutraceutical small molecule (0 associated side effects) For nutritional supplementation, also for treating dietary shortage or imbalance

known side effects mediated through drugs targeting this protein:

\*\*\*\*\*  
\*\*\*\*\*

Histamine H3 receptor - Group: Receptor

Treated with:

histamine phosphate: approved small molecule (0 associated side effects) Histamine phosphate is indicated as a diagnostic aid for evaluation of gastric acid secretory function.

betahistidine: approved small molecule (18 associated side effects) For the reduction of episodes of vertigo association with Ménière's disease.

18 known side effects mediated through drugs targeting this protein:

Abdominal discomfort Anaphylactic shock Angioedema Dermatitis  
Dermatitis atopic Emotional distress Extrasystoles  
Gastrointestinal disorder Headache Hypersensitivity  
Nausea Nervous system disorder Oedema Pruritus  
Rash Somnolence Urticaria Ventricular extrasystoles

\*\*\*\*\*  
\*\*\*\*\*

Somatostatin receptor type 1 - Group: Receptor

Treated with:

octreotide: approved small molecule (0 associated side effects)  
For treatment of acromegaly and reduction of side effects from cancer chemotherapy

known side effects mediated through drugs targeting this protein:

\*\*\*\*\*  
\*\*\*\*\*

Proton-coupled amino acid transporter 1 - Group: Transporter

Treated with:

glycine: approved, nutraceutical small molecule (38 associated side effects) Supplemental glycine may have antispastic activity. Very early findings suggest it may also have antipsychotic activity as well as antioxidant and anti-inflammatory activities.

L-alanine: approved, nutraceutical small molecule (0 associated side effects) Used for protein synthesis.

38 known side effects mediated through drugs targeting this protein:

Acidosis Agitation Angina pectoris Back pain Blindness  
Blindness transient Chills Coma Convulsion Dehydration  
Diarrhoea Dizziness Dry mouth Electrolyte imbalance  
Encephalopathy Fluid overload Hyperammonaemia  
Hyperkinesia Hypersensitivity Hyponatraemia Hypotension

Lung disorder      Nausea      Oedema      Pain      Polyuria  
Pulmonary congestion      Respiratory tract congestion      Rhinitis  
Salivary hypersecretion      Tachycardia      Thirst  
Thrombophlebitis      Urinary retention      Urticaria      Vertigo  
Visual impairment      Vomiting

\*\*\*\*\*  
\*\*\*\*\*

Trace amine-associated receptor 1 - Group: Receptor

Treated with:

amphetamine:      illicit, approved small molecule      (95 associated side effects)      For treatment of Attention Deficit Disorder with Hyperactivity (ADDH) and narcolepsy in children.

dextroamphetamine:      illicit, approved small molecule      (0 associated side effects)      Used to treat attention deficit hyperactivity disorder (ADHD).

methamphetamine:      illicit, approved small molecule      (30 associated side effects)      For the treatment of Attention Deficit Disorder with Hyperactivity (ADHD) and exogenous obesity.

propylhexedrine:      approved small molecule      (0 associated side effects)      It is used to provide temporary symptomatic relief of nasal congestion due to colds, allergies and allergic rhinitis.

105 known side effects mediated through drugs targeting this protein:

Abdominal pain      Abdominal pain upper      Acute coronary syndrome  
Affect lability      Aggression      Agitation      Anaphylactic shock  
Angina pectoris      Angioedema      Anxiety      Arrhythmia      Asthenia  
Attention deficit/hyperactivity disorder      Blood pressure increased  
Blood pressure systolic increased      Body temperature increased  
Cardiac arrest      Cardiac death      Cardio-respiratory arrest  
Cardiomyopathy      Cerebrovascular accident      Chest pain  
Chills      Coma      Confusional state      Constipation      Convulsion  
Death      Decreased appetite      Delirium      Dependence      Depression  
Dermatitis      Diarrhoea      Disturbance in sexual arousal  
Dizziness      Drug abuse      Drug dependence      Dry mouth      Dyskinesia  
Dysmenorrhoea      Dyspepsia      Dysphoria      Dyspnoea      Erectile dysfunction  
Erythema multiforme      Euphoric mood      Extrasystoles  
Fatigue      Feeling abnormal      Flushing      Gastrointestinal pain  
Hallucination      Headache      Hyperhidrosis      Hyperpyrexia  
Hypersensitivity      Hypertension      Hyperthermia      Hypotension  
Infarction      Infection      Insomnia      Irritability      Lethargy  
Libido decreased      Loss of consciousness      Mood swings      Muscle spasms  
Muscle twitching      Myocardial infarction      Nausea  
Nervousness      Pain      Pallor      Palpitations      Panic attack  
Panic reaction      Personality change      Photosensitivity  
Poisoning      Polyuria      Psychotic disorder      Rash  
Rhabdomyolysis      Schizophrenia      Sedation      Shock      Skin disorder  
Somnolence      Speech disorder      Stevens-Johnson syndrome  
Sudden death      Syncope      Tachycardia      Tension      Tic      Tooth disorder  
Toxic epidermal necrolysis      Tremor      Urinary tract infection  
Urticaria      Viral infection      Vomiting      Weight decreased

\*\*\*\*\*  
\*\*\*\*\*

Cannabinoid receptor 1 - Group: Receptor

Treated with:

dronabinol: illicit, approved small molecule (0 associated side effects) For the treatment of anorexia associated with weight loss in patients with AIDS, and nausea and vomiting associated with cancer chemotherapy in patients who have failed to respond adequately to conventional antiemetic treatments

nabilone: approved small molecule (133 associated side effects) Used for the control of nausea and vomiting, caused by chemotherapeutic agents used in the treatment of cancer, in patients who have failed to respond adequately to conventional antiemetic treatments.

rimonabant: approved small molecule (0 associated side effects) For use in conjunction with diet and exercise for patients with a body mass index greater than 30 kg/m<sup>2</sup>, or patients with a BMI greater than 27 kg/m<sup>2</sup>; with associated risk factors, such as type 2 diabetes or dyslipidaemia.

133 known side effects mediated through drugs targeting this protein:

Abdominal distension Abdominal pain Abnormal dreams Affect  
lability Agitation Akathisia Amblyopia Anaemia Anhidrosis  
Anxiety Apathy Aphthous stomatitis Arrhythmia  
Arthralgia Asthenia Ataxia Back pain Bacterial  
infection Blindness Body temperature increased Cerebrovascular  
accident Chest pain Chills Confusional state Constipation  
Convulsion Cough Decreased appetite Depersonalisation  
Depressed level of consciousness Dermatitis Diarrhoea  
Discomfort Disorientation Disturbance in attention  
Dizziness postural Dry eye Dry mouth Dry throat  
Dyspepsia Dysphoria Dyspnoea Dystonia Dysuria  
Emotional disorder Epistaxis Euphoric mood Eye  
disorder Eye irritation Eye swelling Eyelid disorder Face  
oedema Fatigue Feeling abnormal Flat affect Flushing  
Gastritis Gastrointestinal pain Hallucination Headache  
Hot flush Hyperhidrosis Hyperkinesia Hypersensitivity  
Hypertension Hypoaesthesia Hypotension Hypotonia Ill-  
defined disorder Illusion Increased appetite Infection  
Insomnia Irritability Leukopenia Loss of consciousness  
Malaise Memory impairment Menopausal symptoms Mental  
disability Mood swings Muscle relaxant therapy Muscle twitching  
Musculoskeletal discomfort Myalgia Mydriasis Nasal  
congestion Nasal dryness Neck pain Nervousness Neurosis  
Oedema Orthostatic hypotension Pain Palpitations  
Panic disorder Panic reaction Paraesthesia oral Paranoia  
Pharyngitis Phobia Photophobia Photosensitivity reaction  
Pollakiuria Pruritus Psychotic disorder Rash Scotoma  
Sedation Sensory loss Shock Sinus headache Sleep  
disorder Somnolence Speech disorder Stomatitis Stupor  
Swelling Syncope Tachycardia Tension Thinking abnormal  
Thirst Tinnitus Tongue disorder Tongue oedema  
Tremor Ulcer Urinary retention Vertigo Visual acuity  
reduced Visual impairment Wheezing

\*\*\*\*\*  
\*\*\*\*\*

Membrane copper amine oxidase - Group: Enzyme

Treated with:

phenelzine: approved small molecule (67 associated side effects)

For the treatment of major depressive disorder. Has also been used with some success in the management of bulimia nervosa.

hydralazine: approved small molecule (46 associated side effects) For the treatment of essential hypertension, alone or as an adjunct. Also for the management of severe hypertension when the drug cannot be given orally or when blood pressure must be lowered immediately, congestive heart failure (in combination with cardiac glycosides and diuretics and/or with isosorbide dinitrate), and hypertension secondary to pre-eclampsia/eclampsia.

6-hydroxydopa quinone: experimental small molecule (0 associated side effects)

99 known side effects mediated through drugs targeting this protein:

Acidosis Agitation Agranulocytosis Angina pectoris Anorgasmia  
Anxiety Arthralgia Asthenia Ataxia Blood creatine  
phosphokinase increased Blood disorder Body temperature  
increased Chills Coma Conjunctivitis Constipation  
Convulsion Cytolytic hepatitis Decreased appetite  
Delirium Dermatitis Diarrhoea Discomfort Disorientation  
Dizziness Dry mouth Dyspnoea Dysuria Eosinophilia  
Erectile dysfunction Euphoric mood Fatigue Feeling  
abnormal Feeling jittery Flushing Glaucoma Headache  
Hepatitis Hepatocellular injury Hyperhidrosis  
Hypernatraemia Hyperpyrexia Hyperreflexia  
Hypersensitivity Hypersomnia Hypertonia Hypoaesthesia  
Hypotension Hypoxia Ileus paralytic Ill-defined disorder  
Insomnia Jaundice Lacrimation increased Laryngeal oedema  
Leukopenia Liver injury Lymphadenopathy Malaise Mania  
Metabolic acidosis Muscle rigidity Muscle spasms  
Muscle twitching Musculoskeletal discomfort Nasal congestion  
Nausea Nervousness Neuritis Neuropathy peripheral  
Nightmare Nystagmus Oedema Orthostatic hypotension  
Palpitations Paradoxical pressor response Paraesthesia  
Pruritus Psychotic disorder Purpura Rash Repetitive  
speech Schizophrenia Sensory loss Shock Sleep disorder  
Somnolence Splenomegaly Systemic lupus erythematosus  
Tachycardia Tachypnoea Tremor Urinary retention Urticaria  
Vascular purpura Vision blurred Vomiting Weight increased  
Withdrawal syndrome

\*\*\*\*\*  
\*\*\*\*\*

Transferrin Receptor Protein - Group: Receptor

Treated with:

gallium nitrate: approved small molecule (0 associated side effects) For the treatment of hypercalcemia. Also intended for the treatment of non-hodgkin's lymphoma.

known side effects mediated through drugs targeting this protein:

\*\*\*\*\*  
\*\*\*\*\*

Monocarboxylate transporter 1 - Group: Transporter

Treated with:

pyruvic acid: approved, nutraceutical small molecule (0 associated side effects) For nutritional supplementation, also for treating dietary shortage or imbalance

l-glutamic acid: approved, nutraceutical small molecule (0 associated side effects) Considered to be nature's "Brain food" by improving mental capacities; helps speed the healing of ulcers; gives a "lift" from fatigue; helps control alcoholism, schizophrenia and the craving for sugar.

valproic acid: approved small molecule (272 associated side effects) For treatment and management of seizure disorders, mania, and prophylactic treatment of migraine headache.

aminohippurate: approved small molecule (0 associated side effects) Used to measure effective renal plasma flow (ERPF) and to determine the functional capacity of the tubular excretory mechanism.

foscarnet: approved small molecule (169 associated side effects) For the treatment of CMV retinitis in patients with acquired immunodeficiency syndrome (AIDS) and for treatment of acyclovir-resistant mucocutaneous HSV infections in immunocompromised patients.

methotrexate: approved small molecule (209 associated side effects) For the treatment of gestational choriocarcinoma, chorioadenoma destruens and hydatidiform mole. Also for the treatment of severe psoriasis and severe, active, classical or definite rheumatoid arthritis.

niacin: approved, nutraceutical small molecule (0 associated side effects) For the treatment of type IV and V hyperlipidemia. It is indicated as adjunctive therapy.

nateglinide: approved small molecule (32 associated side effects) For the treatment of non-insulin dependent-diabetes mellitus in conjunction with diet and exercise.

salicylic acid: approved small molecule (33 associated side effects) Key additive in many skin-care products for the treatment of acne, psoriasis, callouses, corns, keratosis pilaris and warts.

probenecid: approved small molecule (27 associated side effects) For the reduction of serum uric acid concentrations in chronic gouty arthritis and tophaceous gout in patients with frequent disabling gout attacks. Has also been effectively used to promote uric acid excretion in hyperuricemia secondary to the administration of thiazide and related diuretics.

gamma hydroxybutyric acid: illicit, approved small molecule (0 associated side effects) Used as a general anesthetic, to treat conditions such as insomnia, clinical depression, narcolepsy, and alcoholism, and to improve athletic performance.

acetoacetic acid: experimental small molecule (0 associated side effects)

d-lactic acid: experimental small molecule (0 associated side effects)

alpha-ketoisovalerate: experimental small molecule (0 associated side effects)

quercetin: experimental small molecule (0 associated side effects)

6-deoxyglucose: experimental small molecule (0 associated side effects)

taurocholic acid:experimental small molecule (0 associated side effects)  
niflumic acid: approved small molecule (0 associated side effects) Used in the treatment of rheumatoid arthritis.

456 known side effects mediated through drugs targeting this protein:

Abdominal discomfort Abdominal pain Abdominal pain upper  
Abnormal dreams Abscess Acidosis Acne Adenoma benign  
Affect lability Aggression Agitation Agranulocytosis  
Alanine aminotransferase increased Albuminuria Alopecia  
Alveolitis Alveolitis allergic Amblyopia Amenorrhoea Amino  
acid metabolism disorder Ammonia increased Amnesia Anaemia  
Anaphylactic shock Anaphylactoid reaction Anxiety  
Aphasia Aplastic anaemia Arrhythmia Arterial thrombosis  
Arthralgia Arthropathy Aspartate aminotransferase increased  
Assisted fertilisation Asterixis Asthenia Asthma  
Ataxia Atrioventricular block Atrioventricular block first  
degree Atrophy Aura Autism spectrum disorder Azoospermia  
Azotaemia Back pain Bacterial infection Bladder pain  
Bleeding time prolonged Blindness Blindness transient  
Blood albumin decreased Blood alkaline phosphatase  
increased Blood amylase increased Blood creatinine decreased  
Blood creatinine increased Blood fibrinogen decreased Blood  
lactate dehydrogenase increased Blood urea increased Blood uric  
acid increased Body temperature decreased Body temperature  
increased Bone disorder Bone pain Bradycardia Breast  
enlargement Breast feeding Bronchitis Bronchospasm Cachexia  
Candidiasis Cardiac arrest Catatonia Cell death Cerebral  
artery thrombosis Cerebral atrophy Cerebral thrombosis  
Cerebrovascular accident Cerebrovascular disorder Chest  
pain Chills Cluster headache Cognitive disorder Coma  
Confusional state Congenital anomaly Congenital eye  
disorder Conjunctivitis Constipation Convulsion  
Coordination abnormal Cough Cryptococcosis Cutaneous lupus  
erythematosus Cutaneous vasculitis Cyanosis Cystitis  
Cystitis noninfective Cytomegalovirus infection Deafness  
Death Decreased appetite Deep vein thrombosis Dehydration  
Dementia Dental plaque Depressed level of consciousness  
Dermatitis Dermatitis bullous Dermatitis exfoliative  
Developmental delay Diabetes insipidus Diabetes mellitus  
Diarrhoea Diplopia Discomfort Disease progression  
Dizziness Drug interaction Drug level increased Drug  
withdrawal syndrome Dry eye Dry mouth Dry skin Duodenal  
ulcer Dysarthria Dysgeusia Dyskinesia Dysmenorrhoea Dyspepsia  
Dysphagia Dysplasia Dyspnoea Dysuria Ear disorder  
Ear infection Ear pain Ecchymosis Effusion  
Electroencephalogram abnormal Electrolyte imbalance  
Embolism Emotional distress Encephalopathy Enteritis  
Enuresis Eosinophilia Epidermal necrosis Epistaxis  
Erectile dysfunction Eructation Erythema Erythema  
multiforme Erythema nodosum Euphoric mood Extravasation Eye  
disorder Eye pain Face oedema Factor I deficiency Faecal  
incontinence Fanconi syndrome Fasting Fatigue Febrile  
neutropenia Feeling abnormal Fibrosarcoma Fibrosis Flatulence

Flushing Foetor hepaticus Folate deficiencyFolliculitis  
 Fungal infection Furuncle Gait disturbance Galactorrhoea  
 Gamma-glutamyltransferase increased Gastric ulcer  
 Gastritis Gastroenteritis Gastrointestinal disorder  
 Gastrointestinal oedema Gastrointestinal pain  
 Gastrointestinal toxicity Gingival bleedingGingival pain  
 Gingivitis Glossitis Grand mal convulsion Growth  
 retardationGynaecomastia Haematemesis Haematocrit decreased  
 Haematoma Haematuria HaemoglobinHaemolytic anaemia  
 HaemoptysisHaemorrhageHallucination Headache Hearing  
 impaired HemiparesisHepatic cirrhosisHepatic enzyme increased  
 Hepatic failure Hepatic function abnormal Hepatic necrosis  
 Hepatitis Hepatitis acute Hepatitis cholestatic  
 Hepatobiliary disease Hepatocellular injury Herpes virus  
 infection Herpes zoster Hiccups Histoplasmosis  
 Hyperammonaemia Hyperbilirubinaemia Hyperhidrosis  
 Hyperphosphataemia Hyperreflexia Hypersensitivity  
 Hypertension Hypertonia HypertrophyHyperuricaemia  
 Hypoaesthesia Hypocalcaemia Hypocoagulable state  
 Hypogammaglobulinaemia Hypoglycaemia Hypokalaemia  
 HypokinesiaHypomagnesaemia Hyponatraemia Hypophosphataemia  
 Hypoproteinaemia HypotensionHypothermiaIll-defined disorder  
 Inappropriate antidiuretic hormone secretion Incontinence  
 Increased appetite Infection InfertilityInflammation  
 Influenza Influenza like illness Injection site inflammation  
 Injection site pain Injection site reaction Insomnia  
 Interstitial lung disease Intra-uterine death  
 Irritability Jaundice Lethargy Leukoencephalopathy  
 Leukopenia Liver disorder Liver function test abnormalLoss  
 of libido Lung disorder Lung infection Lung infiltration  
 Lymphadenopathy Lymphocytosis Lymphoma  
 Lymphoproliferative disorderMacrocytosis Maculopathy  
 Malaise Melaena Melkersson-Rosenthal syndrome  
 Meningitis Meningitis aseptic Menstrual disorder  
 Menstruation irregular Mental disabilityMetrorrhagia  
 Microsomia Migraine Mood swingsMouth ulceration Muscle  
 contractions involuntary Muscle rigidity Muscle spasms  
 Muscle twitching Muscular weaknessMusculoskeletal discomfort  
 Musculoskeletal stiffness Myalgia Myopathy Myositis  
 Nausea Neck pain Necrosis Neoplasm Neoplasm  
 malignant Nephrolithiasis NephropathyNephrotic syndrome Nerve  
 root lesionNervousnessNeural tube defect Neuropathy peripheral  
 NeutropeniaNocardiosisNocturia Nonketotic hyperglycinaemia  
 Nuchal rigidity Nystagmus ObstructionObstructive airways  
 disorder Oedema Oedema peripheralOesophagitis  
 Opportunistic infection Orthostatic hypotension  
 Osteoarthritis Osteonecrosis Osteoporosis Otitis  
 mediaOvarian disorder Pain Palpitations Pancreatic disorder  
 Pancreatitis acute Pancytopenia Paraesthesia  
 Paresis Pericardial effusion Pericarditis Personality  
 disorder Petechiae Petit mal epilepsy Pharyngitis Phlebitis  
 PhotophobiaPhotosensitivity reaction Platelet disorder  
 Pleural disorder Pleural effusion Pneumocystis jiroveci  
 pneumonia Pneumonia Pneumonia cytomegaloviral Pneumothorax  
 PollakiuriaPolycystic ovaries Polyuria Porphyria



Porphyria acute    Productive cough    Protein urine present  
 Proteinuria Pruritus    Pruritus generalised    Psychotic  
 disorder    Pulmonary embolism    Pulmonary fibrosis    Pulmonary  
 oedema    Pulmonary toxicity    Radiculopathy    Rales Rash    Rash  
 erythematous    Rash maculo-papular    Rash papular    Rash  
 pustular    Rectal haemorrhage    Renal colic Renal failure    Renal  
 failure acute    Renal impairment    Renal tubular disorder    Respiratory  
 disorder    Respiratory failure    Respiratory tract infection  
           Retinal vein thrombosis    Retinitis pigmentosa  
           Rhabdomyolysis    Rhinitis    Sarcoma    Seborrhoeic dermatitis  
           Sedation    Sepsis    Sinus tachycardia Sinusitis    Skin  
 burning sensation Skin discolouration    Skin exfoliation Skin  
 necrosis    Skin ulcer    Sleep disorder    Social avoidant behaviour  
           Soft tissue necrosis    Somnolence    Speech disorder    Spina  
 bifida    Spinal cord disorder    Stomatitis    Stridor    Stupor  
           Sudden death    Swelling    Systemic lupus erythematosus  
           Tachycardia Tardive dyskinesia    Telangiectasia    Tenderness  
           Tension    Teratogenicity    Testicular atrophy    Thinking  
 abnormal    Thirst    Thrombocytopenia    Thrombophlebitis    Thrombosis  
           Thyroid disorder    Thyroid function test abnormal    Tinnitus  
           Tooth abscess    Tooth disorder    Toxic epidermal necrolysis  
           Tremor    Tumour lysis syndrome    Ulcer Upper respiratory  
 tract infection    Ureteric obstruction    Urethral disorder Urinary  
 incontinence    Urinary retention Urinary tract infection    Urine  
 output increased    Urticaria    Vaginal discharge Vaginal haemorrhage  
           Vaginal infection Vaginal inflammation    Vascular anomaly  
           Vasculitis    Vasodilation procedure    Venous thrombosis Ventricular  
 arrhythmia    Vertigo    Viral infection    Vision blurred    Visual  
 acuity reduced    Visual impairment Vomiting    Weight decreased  
           Weight increased    White blood cell disorder    X-linked  
 lymphoproliferative syndrome

\*\*\*\*\*  
 \*\*\*\*\*

Granulocyte colony-stimulating factor receptor - Group: Receptor  
 Treated with:  
 pegfilgrastim: approved biotech (0 associated side effects)  
 Increases leukocyte production, for treatment in non-myeloid  
 cancer, neutropenia and bone marrow transplant

known side effects mediated through drugs targeting this protein:

\*\*\*\*\*  
 \*\*\*\*\*

Mitochondrial folate transporter/carrier - Group: Transporter  
 Treated with:  
 folic acid: approved, nutraceutical small molecule (0 associated  
 side effects) For treatment of folic acid deficiency,  
 megaloblastic anemia and in anemias of nutritional supplements,  
 pregnancy, infancy, or childhood.

known side effects mediated through drugs targeting this protein:

\*\*\*\*\*  
 \*\*\*\*\*

Solute carrier organic anion transporter family member 1A2 - Group:  
Transporter

Treated with:

cyclosporine: approved biotech (0 associated side effects)

For treatment of transplant rejection, rheumatoid arthritis,  
severe psoriasis

pravastatin: approved small molecule (147 associated side  
effects) For the treatment of hypercholesterolemia and to reduce  
the risk of cardiovascular disease.

erythromycin: approved small molecule (53 associated side  
effects) For use in the treatment of infections caused by  
susceptible strains of microorganisms in the following diseases:  
respiratory tract infections (upper and lower) of mild to moderate  
degree, pertussis (whooping cough), as adjunct to antitoxin in  
infections due to *Corynebacterium diphtheriae*, in  
the treatment of infections due to *Corynebacterium*  
*minutissimum*, intestinal amebiasis caused by  
*Entamoeba histolytica*, acute pelvic inflammatory  
disease caused by *Neisseria gonorrhoeae*, skin and  
soft tissue infections of mild to moderate severity caused by  
*Streptococcus pyogenes* and  
*Staphylococcus aureus*, primary syphilis caused by  
*Treponema pallidum*, infections caused by  
*Chlamydia trachomatis*, nongonococcal urethritis  
caused by *Ureaplasma urealyticum*, and  
Legionnaires' disease caused by *Legionella*  
*pneumophila*.

nelfinavir: approved small molecule (87 associated side effects)

Used in combination with other antiviral drugs in the  
treatment of HIV in both adults and children.

indinavir: approved small molecule (89 associated side effects)

Indinavir is an antiretroviral drug for the treatment of HIV  
infection.

lovastatin: approved small molecule (100 associated side  
effects) For management as an adjunct to diet to reduce elevated  
total-C, LDL-C, apo B, and TG levels in patients with primary  
hypercholesterolemia and mixed dyslipidemia. For primary prevention  
of coronary heart disease and to slow progression of coronary  
atherosclerosis in patients with coronary heart disease.

liothyronine: approved small molecule (0 associated side  
effects) Used as replacement or supplemental therapy in patients  
with hypothyroidism of any etiology, except transient hypothyroidism  
during the recovery phase of subacute thyroiditis.

conjugated estrogens: approved small molecule (219 associated  
side effects) For the treatment of moderate to severe vasomotor  
symptoms associated with the menopause, atrophic vaginitis,  
osteoporosis, hypoestrogenism due to hypogonadism, castration,  
primary ovarian failure, breast cancer (for palliation only), and  
Advanced androgen-dependent carcinoma of the prostate (for  
palliation only)

indomethacin: approved small molecule (164 associated side  
effects) For moderate to severe rheumatoid arthritis including  
acute flares of chronic disease, ankylosing spondylitis,  
osteoarthritis, acute painful shoulder (bursitis and/or tendinitis)  
and acute gouty arthritis.

aminohippurate: approved small molecule (0 associated side effects) Used to measure effective renal plasma flow (ERPF) and to determine the functional capacity of the tubular excretory mechanism.

digoxin: approved small molecule (56 associated side effects)

For the treatment and management of congestive cardiac insufficiency, arrhythmias and heart failure.

spironolactone: approved small molecule (34 associated side effects) Used primarily to treat low-renin hypertension, hypokalemia, and Conn's syndrome.

quinine: approved small molecule (0 associated side effects)

For the treatment of malaria and leg cramps

ritonavir: approved small molecule (297 associated side effects) Indicated in combination with other antiretroviral agents for the treatment of HIV-infection.

methotrexate: approved small molecule (209 associated side effects) For the treatment of gestational choriocarcinoma, chorioadenoma destruens and hydatidiform mole. Also for the treatment of severe psoriasis and severe, active, classical or definite rheumatoid arthritis.

enalapril: approved small molecule (0 associated side effects)

For the treatment of essential or renovascular hypertension and symptomatic congestive heart failure. It may be used alone or in combination with thiazide diuretics.

testosterone: approved small molecule (274 associated side effects) To be used as hormone replacement or substitution of diminished or absent endogenous testosterone. Use in males: For management of congenital or acquired hypogonadism, hypogonadism associated with HIV infection, and male climacteric (andopause). Use in females: For palliative treatment of androgen-responsive, advanced, inoperable, metastatic (skeletal) carcinoma of the breast in women who are 1-5 years postmenopausal; testosterone esters may be used in combination with estrogens in the management of moderate to severe vasomotor symptoms associated with menopause in women who do not respond to adequately to estrogen therapy alone.

prednisone: approved small molecule (162 associated side effects) For the treatment of drug-induced allergic reactions, perennial or seasonal allergic rhinitis, serum sickness, giant cell arteritis acute rheumatic or nonrheumatic carditis, systemic dermatomyositis, systemic lupus erythematosus, atopic dermatitis, contact dermatitis, exfoliative dermatitis, bullous dermatitis herpetiformis, severe seborrheic dermatitis, severe (Stevens-Johnson syndrome) erythema multiforme, mycosis fungoides, pemphigus, severe psoriasis, acute adrenocortical insufficiency, Addison's disease, secondary adrenocortical insufficiency, congenital adrenal hyperplasia, hypercalcemia associated with neoplasms, nonsuppurative thyroiditis, ulcerative colitis, Crohn's disease, acquired hemolytic anemia, congenital hypoplastic anemia, erythroblastopenia, adult secondary thrombocytopenia, adult idiopathic thrombocytopenia purpura, acute or subacute bursitis, epicondylitis, acute nonspecific tenosynovitis, acute or chronic lymphocytic leukemia, Hodgkin's or non-Hodgkin's lymphomas, Waldenstrom's macroglobulinemia, primary brain tumors (adjunct), nephrotic syndrome, tuberculous meningitis, multiple sclerosis, myasthenia gravis. cerebral edema, chorioretinitis, diffuse posterior

choroiditis, allergic conjunctivitis, Herpes zoster ophthalmicus, anterior segment inflammation, iridocyclitis, iritis, keratitis, optic neuritis, sympathetic ophthalmia, corneal marginal allergic ulcers, symptomatic sarcoidosis, Loeffler's syndrome not manageable by other means, berylliosis, fulminating or disseminated pulmonary tuberculosis when used concurrently with appropriate antituberculous chemotherapy and aspiration pneumonitis.

simvastatin: approved small molecule (116 associated side effects) For the treatment of hypercholesterolemia.

estrone: approved small molecule (0 associated side effects) For management of perimenopausal and postmenopausal symptoms.

verapamil: approved small molecule (113 associated side effects) For the treatment of hypertension, angina, and cluster headache prophylaxis.

sumatriptan: approved small molecule (317 associated side effects) For the treatment of migraine attacks with or without aura.

rocuronium: approved small molecule (25 associated side effects)

For inpatients and outpatients as an adjunct to general anesthesia to facilitate both rapid sequence and routine tracheal intubation, and to provide skeletal muscle relaxation during surgery or mechanical ventilation.

hydrocortisone: approved small molecule (0 associated side effects) For the relief of the inflammatory and pruritic manifestations of corticosteroid-responsive dermatoses. Also used to treat endocrine (hormonal) disorders (adrenal insufficiency, Addison's disease). It is also used to treat many immune and allergic disorders, such as arthritis, lupus, severe psoriasis, severe asthma, ulcerative colitis, and Crohn's disease.

estradiol: approved small molecule (315 associated side effects) For the treatment of urogenital symptoms associated with post-menopausal atrophy of the vagina (such as dryness, burning, pruritus and dyspareunia) and/or the lower urinary tract (urinary urgency and dysuria).

naproxen: approved small molecule (322 associated side effects) For the treatment of rheumatoid arthritis, osteoarthritis, ankylosing spondylitis, tendinitis, bursitis, and acute gout. Also for the relief of mild to moderate pain and the treatment of primary dysmenorrhea.

prednisolone: approved small molecule (127 associated side effects) For the treatment of primary or secondary adrenocortical insufficiency, such as congenital adrenal hyperplasia, thyroiditis. Also used to treat psoriatic arthritis, rheumatoid arthritis, ankylosing spondylitis, bursitis, acute gouty arthritis and epicondylitis. Also indicated for treatment of systemic lupus erythematosus, pemphigus and acute rheumatic carditis. Can be used in the treatment of leukemias, lymphomas, thrombocytopenia purpura and autoimmune hemolytic anemia. Can be used to treat celiac disease, insulin resistance, ulcerative colitis and liver disorders.

bumetanide: approved small molecule (50 associated side effects)

For the treatment of edema associated with congestive heart failure, hepatic and renal disease including the nephrotic syndrome.

quinidine: approved small molecule (146 associated side effects) For the treatment of ventricular pre-excitation and cardiac dysrhythmias

dinoprostone: approved small molecule (0 associated side effects) For the termination of pregnancy during the second trimester (from the 12th through the 20th gestational week as calculated from the first day of the last normal menstrual period), as well as for evacuation of the uterine contents in the management of missed abortion or intrauterine fetal death up to 28 weeks of gestational age as calculated from the first day of the last normal menstrual period. Also used in the management of nonmetastatic gestational trophoblastic disease (benign hydatidiform mole). Other indications include improving the cervical inducibility (cervical "ripening") in pregnant women at or near term with a medical or obstetrical need for labor induction, and the management of postpartum hemorrhage.

fexofenadine: approved small molecule (65 associated side effects) For management of Seasonal allergic rhinitis

ketoprofen: approved small molecule (126 associated side effects) For symptomatic treatment of acute and chronic rheumatoid arthritis, osteoarthritis, ankylosing spondylitis, primary dysmenorrhea and mild to moderate pain associated with musculoskeletal trauma (sprains and strains), postoperative (including dental surgery) or postpartum pain.

glyburide: approved small molecule (52 associated side effects)

Indicated as an adjunct to diet to lower the blood glucose in patients with NIDDM whose hyperglycemia cannot be satisfactorily controlled by diet alone.

ketoconazole: approved small molecule (59 associated side effects) For the treatment of the following systemic fungal

infections: candidiasis, chronic mucocutaneous candidiasis, oral thrush, candiduria, blastomycosis, coccidioidomycosis, histoplasmosis, chromomycosis, and paracoccidioidomycosis.

probenecid: approved small molecule (27 associated side effects)

For the reduction of serum uric acid concentrations in chronic gouty arthritis and tophaceous gout in patients with frequent disabling gout attacks. Has also been effectively used to promote uric acid excretion in hyperuricemia secondary to the administration of thiazide and related diuretics.

rifampin: approved small molecule (0 associated side effects)

For the treatment of Tuberculosis and Tuberculosis-related mycobacterial infections.

ibuprofen: approved small molecule (252 associated side effects)

atorvastatin: approved small molecule (195 associated side effects) May be used as primary prevention in individuals with multiple risk factors for coronary heart disease (CHD) and as secondary prevention in individuals with CHD to reduce the risk of myocardial infarction (MI), stroke, angina, and revascularization procedures. May be used to reduce the risk of cardiovascular events in patients with acute coronary syndrome (ACS). May be used in the treatment of primary hypercholesterolemia and mixed dyslipidemia, homozygous familial hypercholesterolemia, primary dysbetalipoproteinemia, and/or hypertriglyceridemia as an adjunct to dietary therapy to decrease serum total and low-density lipoprotein cholesterol (LDL-C), apolipoprotein B (apoB), and triglyceride concentrations, while increasing high-density lipoprotein cholesterol (HDL-C) levels.

ouabain: approved small molecule (0 associated side effects)  
For the treatment of atrial fibrillation and flutter and heart failure

tolbutamide: approved small molecule (0 associated side effects)  
For treatment of NIDDM (non-insulin-dependent diabetes mellitus) in conjunction with diet and exercise.

phenobarbital: approved small molecule (54 associated side effects)  
For the treatment of all types of seizures except absence seizures.

naloxone: approved small molecule (54 associated side effects)  
For the complete or partial reversal of narcotic depression, including respiratory depression, induced by opioids including natural and synthetic narcotics, propoxyphene, methadone and the narcotic-antagonist analgesics: nalbuphine, pentazocine and butorphanol.

saquinavir: approved small molecule (321 associated side effects)  
For the treatment of HIV-1 with advanced immunodeficiency together with antiretroviral nucleoside analogues.

dexamethasone: approved small molecule (147 associated side effects)

digitoxin: approved small molecule (0 associated side effects)  
For the treatment and management of congestive cardiac insufficiency, arrhythmias and heart failure.

liotrix: approved small molecule (0 associated side effects)  
May be used to treat primary, secondary or tertiary hypothyroidism. May also be used to suppress thyroid stimulating hormone (TSH) secretion in patients with simple (nontoxic) goiter, subacute or chronic lymphocytic thyroiditis multinodular goiter, and in the management of thyroid cancer. May be used in conjunction with other antithyroid agents to treat thyrotoxicosis to prevent goitrogenesis and hypothyroidism. May also be used for differential diagnosis of suspected mild hyperthyroidism or thyroid gland autonomy.

ursodeoxycholic acid: approved small molecule (210 associated side effects)  
The drug reduces cholesterol absorption and is used to dissolve (cholesterol) gallstones in patients who want an alternative to surgery.

glycochenodeoxycholic acid: experimental small molecule (0 associated side effects)

taurocholic acid: experimental small molecule (0 associated side effects)

estriol: approved small molecule (0 associated side effects)  
Used as a test to determine the general health of an unborn fetus.

aldosterone: experimental small molecule (0 associated side effects)

methyltestosterone: approved small molecule (29 associated side effects)  
Methyltestosterone is an anabolic steroid hormone used to treat men with a testosterone deficiency. It is also used in women to treat breast cancer, breast pain, swelling due to pregnancy, and with the addition of estrogen it can treat symptoms of menopause.

1202 known side effects mediated through drugs targeting this protein:

5q minus syndrome Abdominal discomfort Abdominal distension  
 Abdominal pain Abdominal pain upper Abdominal symptom  
 Abnormal dreams Abnormal faeces Abnormal labour Abscess  
 Abscess sterile Acidosis Acne Activated partial  
 thromboplastin time prolonged Acute coronary syndrome Acute  
 leukaemia Acute myeloid leukaemia Acute tonsillitis Adenoma  
 benign Adrenal insufficiency Affect lability Affective  
 disorder Ageusia Aggression Agitation Agranulocytosis  
 Akathisia Akinesia Alanine aminotransferase increased  
 Albuminuria Alcohol intolerance Alkalosis Alkalosis  
 hypokalaemic Alopecia Alveolitis Alveolitis allergic  
 Amblyopia Amenorrhoea Amnesia Amyloidosis Anaemia  
 Anaemia megaloblastic Anal pruritus Analgesic therapy  
 Anaphylactic shock Anaphylactoid reaction Androgenetic  
 alopecia Aneurysm Anger Angina pectoris Angioedema Angiopathy  
 Anorectal discomfort Anorectal disorder Antinuclear  
 antibody positive Anxiety Aortic aneurysm Aortic dissection  
 Aortic valve stenosis Apathy Aphasia Aphthous  
 stomatitis Aplastic anaemia Apnoea Appetite disorder Application  
 site oedema Application site reaction Arachnoiditis Arrhythmia  
 Arterial disorder Arterial occlusive disease Arterial  
 thrombosis Arteriosclerosis Arteriospasm coronary Arteritis  
 Arthralgia Arthritis Arthropathy Artificial menopause  
 Ascites Aspartate aminotransferase increased Aspiration  
 Asterixis Asthenia Asthma Ataxia Atelectasis Atopy  
 Atrial fibrillation Atrial tachycardia Atrioventricular  
 block complete Atrioventricular block first degree  
 Atrioventricular block second degree Atrioventricular  
 dissociation Atrophy Azoospermia Azotaemia Back pain  
 Bacteraemia Bacterial infection Balance disorder Basal cell  
 carcinoma Benign intracranial hypertension Benign neoplasm  
 Benign prostatic hyperplasia Benign vaginal neoplasm  
 Biliary colic Bladder disorder Bladder dysfunction  
 Bladder irritation Bladder pain Bleeding time  
 prolonged Blepharitis Blindness Blindness transient Blister  
 Blood albumin decreased Blood alkaline phosphatase  
 increased Blood bilirubin increased Blood cholesterol increased  
 Blood creatine phosphokinase increased Blood creatinine  
 decreased Blood creatinine increased Blood disorder Blood  
 glucose decreased Blood glucose increased Blood lactate  
 dehydrogenase increased Blood magnesium decreased Blood  
 potassium decreased Blood potassium increased Blood pressure  
 diastolic decreased Blood pressure increased Blood pressure  
 systolic increased Blood prolactin increased Blood  
 testosterone decreased Blood thyroid stimulating hormone increased  
 Blood triglycerides increased Blood urea increased Blood  
 uric acid increased Body temperature decreased Body temperature  
 increased Bone disorder Bone pain Bradycardia Breast cancer  
 Breast cancer in situ Breast cancer stage IV Breast discharge  
 Breast discomfort Breast disorder Breast engorgement  
 Breast enlargement Breast feeding Breast malformation  
 Breast mass Breast neoplasm Breast pain Breast swelling  
 Breast tenderness Bronchitis Bronchospasm Bruxism  
 Bundle branch block Bundle branch block right Burning  
 sensation Bursitis Cachexia Calcinosis Calculus urinary

Candidiasis Carbohydrate tolerance decreased Cardiac arrest  
Cardiac disorder Cardiac failure Cardiac failure congestive  
Cardiac fibrillation Cardiac murmur Cardiac valve disease  
Cardioactive drug level Cardiomegaly Cardiomyopathy  
Cardiovascular disorder Carpal tunnel syndrome Cataract  
Cataract subcapsular Cell death Cells in urine Cellulitis  
gangrenous Cerebral artery thrombosis Cerebral haemorrhage  
Cerebral ischaemia Cerebral thrombosis Cerebral venous  
thrombosis Cerebrovascular accident Cerebrovascular disorder  
Cervical discharge Cervix carcinoma Cervix disorder  
Chalazion Cheilitis Chest discomfort Chest pain Chills  
Chloasma Cholangitis Cholangitis sclerosing Cholecystitis  
Cholelithiasis Cholestasis Chorea Choreoathetosis  
Chorioretinopathy Coagulopathy Cognitive disorder Cold  
sweat Colitis Colitis ischaemic Colitis ulcerative Colorectal  
cancer Coma Coma hepatic Completed suicide Compression  
fracture Conduction disorder Confusional state Congenital cystic  
kidney disease Congenital generalised lipodystrophy  
Conjunctival haemorrhage Conjunctival hyperaemia  
Conjunctivitis Connective tissue disorder Constipation  
Contact lens intolerance Conversion disorder Convulsion  
Coordination abnormal Corneal deposits Corneal infection  
Corneal opacity Coronary artery disease Coronary artery  
thrombosis Cough Crohn's disease Cryptococcosis Crystal urine  
Crystalluria Cushing's syndrome Cushingoid Cutaneous  
vasculitis Cyanosis Cystitis Cystitis noninfective Cytolytic  
hepatitis Cytomegalovirus chorioretinitis Cytomegalovirus  
infection Dandruff Deafness Death Decreased appetite Deep  
vein thrombosis Deformity Dehydration Delirium Dementia  
Dental plaque Dependence Depersonalisation Depressed level  
of consciousness Depressed mood Depression Depression suicidal  
Depressive symptom Dermatitis Dermatitis acneiform  
Dermatitis atopic Dermatitis bullous Dermatitis contact  
Dermatitis exfoliative Dermatomyositis Diabetes mellitus  
Diarrhoea Diarrhoea haemorrhagic Diplegia Diplopia  
Discomfort Disorientation Disseminated intravascular  
coagulation Dissociation Disturbance in attention Disturbance  
in sexual arousal Diverticulitis Diverticulum Dizziness Drug  
abuse Drug dependence Drug eruption Drug hypersensitivity Drug  
interaction Drug rash with eosinophilia and systemic symptoms Drug  
tolerance Dry eye Dry mouth Dry skin Duodenal ulcer  
Dysaesthesia Dysarthria Dyschezia Dysentery Dysgeusia  
Dyskinesia Dysmenorrhoea Dyspepsia Dysphagia Dysphonia  
Dysphoria Dysplasia Dyspnoea Dysthymic disorder  
Dystonia Dysuria Ear discomfort Ear disorder Ear  
infection Ear pain Ecchymosis Ectropion of cervix Eczema  
Effusion Ejaculation disorder Elderly Electrocardiogram  
PR interval Electrocardiogram PR prolongation Electrocardiogram QT  
prolonged Electrocardiogram ST segment Electrocardiogram ST segment  
depression Electrocardiogram abnormal Electrocardiogram change  
Electrocardiogram normal Electroencephalogram abnormal  
Electrolyte imbalance Embolism Embolism venous Emotional  
disorder Emotional distress Encephalitis Encephalopathy  
Endocrine disorder Endometrial cancer Endometrial  
disorder Endometrial hypertrophy Endometrial sarcoma



Endometriosis      Enlarged clitoris      Enteritis      Enterocolitis  
 Enzyme abnormality      Eosinophilia      Epidermal necrosis  
 Epidermodysplasia verruciformis      Epidermolysis bullosa  
 Epididymitis      Epilepsy      Epistaxis      Erectile dysfunction  
 Eructation      Erythema      Erythema multiforme      Erythema nodosum  
 Erythropenia      Euphoric mood      Exophthalmos  
 Extrapyrarnidal disorder      Extrasystoles      Extravasation  
 Eye disorder      Eye haemorrhage      Eye infection      Eye  
 inflammation      Eye irritation      Eye oedema      Eye pain      Eye  
 pruritus      Eye swelling      Eyelid oedema      Eyelid ptosis      Face  
 oedema      Facial pain      Facial paresis      Factor VIII deficiency  
 Faecal incontinence      Faeces discoloured      Family stress  
 Fasciitis      Fasting      Fat embolism      Fat redistribution  
 Fat tissue increased      Fatigue      Febrile neutropenia  
 Feeling abnormal      Feeling cold      Feeling of body temperature  
 change      Fibrocystic breast disease      Fibrosis      Flank pain      Flat  
 affect      Flatulence      Fluid retention      Flushing      Foetal disorder  
 Foetor hepaticus      Folliculitis      Fontanelle bulging  
 Frequent bowel movements      Fungal infection      Fungal skin  
 infection      Furuncle      Gait disturbance      Galactorrhoea      Gallbladder  
 disorder      Gamma-glutamyltransferase increased      Gastric disorder  
 Gastric haemorrhage      Gastric perforation      Gastric ulcer  
 Gastritis      Gastroenteritis      Gastrointestinal disorder  
 Gastrointestinal haemorrhage      Gastrointestinal necrosis  
 Gastrointestinal oedema      Gastrointestinal pain  
 Gastrointestinal perforation      Gastrointestinal toxicity  
 Gastrointestinal ulcer      Gastrooesophageal reflux disease  
 Generalised oedema      Genital candidiasis      Genital discharge  
 Genital disorder female      Gingival bleeding      Gingival blister  
 Gingival erythema      Gingival hyperplasia      Gingival pain  
 Gingivitis      Glaucoma      Glomerular filtration rate decreased  
 Glomerulonephritis      Glossitis      Glossodynia      Glucose tolerance  
 decreased      Glucose tolerance impaired      Glycosuria      Goitre      Gout  
 Grand mal convulsion      Granulomatous liver disease      Growth  
 accelerated      Gynaecomastia      Haemangioma      Haemarthrosis  
 Haematemesis      Haematochezia      Haematocrit decreased  
 Haematocrit increased      Haematoma      Haematuria      Haemoglobin  
 Haemoglobin abnormal      Haemoglobin decreased      Haemoglobin  
 increased      Haemoglobinuria      Haemolysis      Haemolytic anaemia  
 Haemolytic uraemic syndrome      Haemoptysis      Haemorrhage      Haemorrhage  
 intracranial      Haemorrhage urinary tract      Haemorrhagic disorder  
 Haemorrhagic stroke      Haemorrhoids      Hair colour changes  
 Hair growth abnormal      Hair texture abnormal      Hallucination  
 Hangover      Headache      Hearing impaired      Heart rate irregular  
 Heat rash      Hemiparesis      Hemiplegia      Hepatic cirrhosis      Hepatic  
 enzyme increased      Hepatic failure      Hepatic function abnormal  
 Hepatic necrosis      Hepatic neoplasm malignant      Hepatic steatosis  
 Hepatitis acute      Hepatitis cholestatic      Hepatitis chronic  
 active      Hepatobiliary disease      Hepatocellular injury  
 Hepatomegaly      Hepatorenal syndrome      Hepatosplenomegaly  
 Hereditary angioedema      Hernia      Herpes simplex      Herpes  
 virus infection      Herpes zoster      Hiccups      High density  
 lipoprotein decreased      Hirsutism      Histoplasmosis      Hormone level  
 abnormal      Hostility      Hot flush      Hunger      Hydronephrosis  
 Hyperadrenocorticism      Hyperaemia      Hyperaesthesia

Hyperamylasaemia Hyperbilirubinaemia Hypercalcaemia  
Hypercholesterolaemia Hyperglycaemia Hyperhidrosis  
Hyperkalaemia Hyperkeratosis Hyperkinesia  
Hyperlactacidaemia Hyperlipidaemia Hypernatraemia  
Hyperphosphataemia Hyperplasia Hyperprolactinaemia  
Hyperreflexia Hypersensitivity Hypertension  
Hyperthyroidism Hypertonia Hypertonic bladder  
Hypertrichosis Hypertriglyceridaemia Hypertrophic  
cardiomyopathy Hypertrophy Hyperuricaemia Hyperventilation  
Hypervigilance Hypoaesthesia Hypoaesthesia facial  
Hypoaesthesia oral Hypoalbuminaemia Hypocalcaemia  
Hypochloraemia Hypogammaglobulinaemia Hypogeusia  
Hypoglycaemia Hypokalaemia Hypomagnesaemia  
Hyponatraemia Hypophosphataemia Hypopituitarism Hypopnoea  
Hypoproteinaemia Hypoprothrombinaemia Hyporeflexia  
Hypotension Hypothermia Hypothyroidism Hypoventilation  
Hypovitaminosis Hypoxia IIIrd nerve paralysis Ichthyosis  
acquired Idiopathic thrombocytopenic purpura Ileitis Ileus  
Ileus paralytic Ill-defined disorder Immune system disorder  
Immunosuppression Impaired healing Impatience Impetigo  
Inappropriate antidiuretic hormone secretion Incontinence  
Increased appetite Induration Infarction Infection  
Infection susceptibility increased Infertility Infertility  
female Infestation Inflammation Inflammatory bowel disease  
Influenza Influenza like illness Ingrowing nail Inguinal  
hernia Injection site inflammation Injection site pain  
Injection site reaction Insomnia Insulin resistance  
Intermittent claudication International normalised ratio  
increased Interstitial lung disease Intervertebral disc disorder  
Intestinal ischaemia Intestinal obstruction Intestinal ulcer  
Intra-uterine death Intracranial pressure increased  
Intraocular pressure increased Intraventricular haemorrhage  
Iridocyclitis Iritis Irritability Ischaemia  
Ischaemic neuropathy Ischaemic stroke Jaundice Jaundice  
cholestatic Joint swelling Keratitis Keratoconjunctivitis sicca  
Ketoacidosis Laboratory test abnormal Lacrimal disorder  
Lacrimation decreased Lacrimation increased Laryngeal  
disorder Laryngeal oedema Laryngitis Laryngospasm Left  
ventricular dysfunction Leiomyoma Lens disorder Lenticular  
opacities Lethargy Leukaemia Leukocytoclastic vasculitis  
Leukoderma Leukoencephalopathy Leukopenia Leukoplakia  
Libido decreased Libido increased Lichen planus Lip dry  
Lipids abnormal Lipids increased Lipoatrophy Lipodystrophy  
acquired Lipohypertrophy Liver disorder Liver function test  
abnormal Liver injury Loss of consciousness Loss of libido  
Lower respiratory tract infection Lung disorder Lung  
infection Lung infiltration Lung neoplasm Lupus miliaris  
disseminatus faciei Lymphadenopathy Lymphocytosis Lymphoma  
Lymphoproliferative disorder Macule Maculopathy Malaise  
Malignant melanoma Malnutrition Mammogram abnormal  
Mania Mantle cell lymphoma Mass Mediastinal disorder  
Medical device complication Melaena Memory impairment  
Meniere's disease Meningioma benign Meningitis Meningitis  
aseptic Menometrorrhagia Menopausal symptoms Menopause  
Menorrhagia Menstrual disorder Menstruation irregular

Mental disabilityMental disorder Mesenteric vascular  
 insufficiency Metabolic acidosis Metabolic alkalosis  
 Metrorrhagia Micturition disorder Micturition urgency  
 Migraine Molluscum contagiosum Monoplegia Mood swings Motor  
 dysfunctionMouth ulceration Movement disorderMucosal inflammation  
 Mucosal ulceration Mucous membrane disorder Multiple  
 hereditary exostosis Muscle atrophy Muscle contractions  
 involuntaryMuscle contracture Muscle fatigue Muscle mass  
 Muscle rigidity Muscle spasms Muscle tightness Muscle  
 twitching Muscular weaknessMusculoskeletal deformity  
 Musculoskeletal discomfort Musculoskeletal disorder  
 Musculoskeletal pain Musculoskeletal stiffness Myalgia  
 Mydriasis Myeloid leukaemiaMyeloproliferative disorder  
 Myocardial infarction Myocardial ischaemia Myocardial  
 rupture Myopathy Myositis Nail discolouration Nail  
 disorder Nail-patella syndrome Nasal congestion Nasal discomfort  
 Nasal inflammation Nasal oedema Nasopharyngitis  
 Nausea Neck pain Necrosis Necrotising colitis  
 Necrotising enterocolitis neonatalNecrotising fasciitis  
 Neoplasm malignant Neoplasm prostateNeoplasm skin  
 Nephritic syndrome Nephritis Nephrolithiasis Nephropathy  
 Nephropathy toxicNephrosclerosis Nephrotic syndrome Nerve  
 root lesionNervous system disorder NervousnessNeuralgia  
 Neuritis Neuropathy peripheral Neurosis NeutropeniaNight  
 blindness Night sweats Nightmare Nipple disorder Nipple pain  
 Nitrogen balance negative NocardiosisNocturia Nodule  
 Nuchal rigidity Nystagmus ObstructionObstructive airways  
 disorder Ocular hypertension Oedema Oedema genital  
 Oedema peripheralOesophageal achalasia Oesophageal disorder  
 Oesophageal spasmOesophageal ulcerOesophagitis  
 Oesophagitis ulcerative Oestrogenic effect  
 Oligomenorrhoea Oliguria Onycholysis Onychomycosis  
 Ophthalmoplegia Opportunistic infection Optic ischaemic  
 neuropathy Optic nerve disorder Optic neuritis Oral candidiasis  
 Oral disorder Oral pruritus Oropharyngeal candidiasis  
 Oropharyngeal discomfort Oropharyngeal pain Orthostatic  
 hypotensionOsteoarthritis Osteomalacia Osteonecrosis  
 Osteopenia Osteoporosis Otitis externa Otitis media  
 Ovarian cancer Ovarian cyst Pain Pain in extremityPain  
 in jaw Pain of skin Pallor Palpitations Pancreatic  
 disorder Pancreatitis Pancreatitis haemorrhagic  
 Pancytopenia Panic disorder Panic reaction  
 Papilloedema Papilloma Paraesthesia Paraesthesia oral  
 Paralysis Paranoia Paraparesis Paraplegia Paresis  
 Paronychia Parosmia Patent ductus arteriosus  
 Pathological fracture Peliosis hepatis Pelvic painPenile pain  
 Penis disorder Peptic ulcer Pericardial effusion  
 Pericarditis Perineal pain Peripheral sensory  
 neuropathy Peripheral vascular disorder Peritonsillar abscess  
 Personality change Personality disorder Petechiae  
 Pharyngeal haemorrhage Pharyngitis Phlebitis Phobia  
 Phonophobia Photophobia Photopsia Photosensitivity reaction  
 Pigmentation disorder Piloerection Pituitary tumour  
 Plasmodium falciparum infection Platelet aggregation  
 decreased Platelet count decreased Pleural disorder Pleural

effusion Pleural infection Pneumocystis jiroveci pneumonia  
 Pneumonia Pneumonia bacterial Pneumonia cytomegaloviral  
 Pneumothorax Poisoning Poliomyelitis Pollakiuria  
 Polyarteritis nodosa Polyarthritits Polycythaemia  
 Polydipsia Polymyalgia rheumatica Polyp Polyuria Porphyria  
 Porphyria non-acute Portal hypertension Postmenopausal  
 haemorrhage Precocious puberty Premature baby Premature  
 ejaculation Premature labour Presyncope Priapism Prinzmetal angina  
 Proctalgia Proctitis Productive cough Progressive multifocal  
 leukoencephalopathy Prostate cancer Prostatic adenoma Prostatic  
 disorder Prostatic specific antigen increased Prostatitis  
 Prostatomegaly Protein urine present Proteinuria Prothrombin  
 level increased Prurigo Pruritus Pruritus generalised  
 Pruritus genital Pseudomembranous colitis Pseudoporphyria  
 Psoriasis Psychiatric symptom Psychotic disorder  
 Puberty Pulmonary congestion Pulmonary embolism  
 Pulmonary eosinophilia Pulmonary fibrosis Pulmonary  
 function test decreased Pulmonary haemorrhage Pulmonary  
 hypertension Pulmonary oedema Pulmonary toxicity Pulse  
 abnormal Purpura Pyelonephritis Pyogenic granuloma  
 Pyuria Quadriparesis Radiculopathy Rales Rash Rash  
 erythematous Rash follicular Rash generalised Rash maculo-  
 papular Rash papular Rash pustular Raynaud's phenomenon  
 Rectal haemorrhage Rectal tenesmus Red blood cell  
 abnormality Red blood cell count increased Red blood cell  
 sedimentation rate increased Refraction disorder Regressive  
 behaviour Regurgitation Renal cancer Renal colic Renal  
 failure Renal failure acute Renal impairment Renal pain Renal  
 papillary necrosis Renal tubular disorder Renal tubular necrosis  
 Reproductive tract disorder Respiration abnormal Respiratory  
 depression Respiratory disorder Respiratory distress Respiratory  
 failure Respiratory tract congestion Respiratory tract infection  
 Retching Retinal artery occlusion Retinal disorder  
 Retinal haemorrhage Retinal vascular occlusion Retinal  
 vein thrombosis Retinitis pigmentosa Retinogram abnormal  
 Retinopathy of prematurity Reye's syndrome Rhabdomyolysis  
 Rhinitis Rhinitis allergic Rhinitis perennial Rhinorrhoea  
 Rhonchi Riley-Day syndrome Salivary gland disorder  
 Salivary gland enlargement Salivary hypersecretion  
 Sarcoma Sarcosinaemia Scar Schizophrenia Scleral  
 disorder Scleritis Scotoma Seborrhoeic dermatitis Secondary  
 adrenocortical insufficiency Sedation Sensation of foreign body  
 Sensation of pressure Sensitisation Sensory disturbance  
 Sensory loss Sepsis Serum sickness Sexual  
 dysfunction Shock Sialoadenitis Sicca syndrome Sinus arrest  
 Sinus arrhythmia Sinus bradycardia Sinus congestion Sinus  
 headache Sinus tachycardia Sinusitis Skin atrophy Skin  
 burning sensation Skin discolouration Skin disorder Skin  
 exfoliation Skin fragility Skin hyperpigmentation Skin hypertrophy  
 Skin irritation Skin lesion Skin mass Skin necrosis Skin  
 papilloma Skin striae Skin test positive Skin tightness Skin  
 ulcer Skin wrinkling Sleep apnoea syndrome Sleep disorder Small  
 for dates baby Smear cervix abnormal Sneezing Social avoidant  
 behaviour Soft tissue disorder Soft tissue necrosis Somnolence  
 Speech disorder Spinal cord disorder Splenomegaly

Staphylococcal infection      Stevens-Johnson syndrome  
 Sticky skin Stomatitis Stupor      Subarachnoid haemorrhage  
 Subcutaneous nodule      Subdural haematoma      Substance abuse  
 Sudden death      Sudden visual loss      Suicidal ideation  
 Suicide attempt      Supraventricular extrasystoles      Surgery  
 Swelling      Swelling face      Syncope      Systemic lupus  
 erythematosus      Tachycardia Telangiectasia      Temperature  
 intolerance Temporal arteritis      Tenderness Tendinous contracture  
 Tendon disorder      Tenosynovitis      Tension      Tension headache  
 Teratogenicity      Testicular atrophy      Tetany      Thinking  
 abnormal      Thirst      Thought blocking Throat irritation  
 Thrombocytopenia Thrombocytopenic purpura      Thrombocytosis  
 Thrombophlebitis superficial Thrombosis Thrombotic  
 thrombocytopenic purpura      Tinnitus      Tongue disorder      Tongue  
 oedema      Tooth abscess      Tooth disorder      Toothache      Torsade de  
 pointes      Torticollis Toxic epidermal necrolysis      Toxic shock  
 syndrome      Toxicity to various agents      Tracheobronchitis  
     Transaminases increased      Transient ischaemic attack  
     Tremor      Tubulointerstitial nephritis Tumour invasion  
     Tumour lysis syndrome Type 2 diabetes mellitus      Ulcer Ulcer  
 haemorrhage Ulcerative keratitis      Upper respiratory tract infection  
     Ureteric obstruction      Urethral disorder Urethritis Urinary  
 hesitation Urinary incontinence      Urinary retention Urinary tract  
 disorder      Urinary tract infection      Urine abnormality Urine  
 analysis abnormal Urine output increased Urogenital disorder  
     Urticaria      Uterine cancer      Uterine cervical erosion  
     Uterine enlargement      Uterine haemorrhage      Uterine leiomyoma  
     Uterine pain      Uterine spasm      Uterovaginal prolapse  
     Uveitis      VIIIth nerve paralysis      Vaginal discharge Vaginal  
 disorder      Vaginal haemorrhage      Vaginal infection Vaginal  
 inflammation      Vaginal neoplasm Vaginal ulceration      Vaginismus  
     Varicocele Varicose vein      Vascular anomaly Vascular  
 occlusion      Vascular purpura Vascular resistance pulmonary increased  
     Vascular resistance systemic Vasculitis Vasculitis necrotising  
     Vasoconstriction Vasodilatation      Vasodilation procedure  
     Vasospasm      Venous thrombosis Ventricular dysfunction  
     Ventricular extrasystoles      Ventricular fibrillation  
     Ventricular tachycardia      Vertigo      Vestibular disorder  
     Viral infection      Virilism      Vision blurred      Visual acuity  
 reduced      Visual impairment Vitreous detachment      Vitreous disorder  
     Vomiting      Vulval disorder      Vulvovaginal candidiasis  
     Vulvovaginal discomfort      Vulvovaginal mycotic infection  
     Vulvovaginal pain Vulvovaginal pruritus      Vulvovaginitis  
     Weight decreased Weight increased Wheezing      White blood cell  
 disorder      White blood cells urine positive      Withdrawal bleed  
     Withdrawal syndrome      Wound haemorrhage X-linked  
 lymphoproliferative syndrome Xanthomatosis      Xanthopsia Xeroderma  
     Xerophthalmia      Yawning

\*\*\*\*\*  
 \*\*\*\*\*

Voltage-dependent anion-selective channel protein 1 - Group: Channel  
 Treated with:  
 dihydroxyaluminium:      approved      small molecule      (0 associated  
 side effects)

known side effects mediated through drugs targeting this protein:

\*\*\*\*\*  
\*\*\*\*\*

Nicotinic acid receptor 2 - Group: Receptor

Treated with:

niacin: approved, nutraceutical small molecule (0 associated side effects) For the treatment of type IV and V hyperlipidemia. It is indicated as adjunctive therapy.

known side effects mediated through drugs targeting this protein:

\*\*\*\*\*  
\*\*\*\*\*

Reticulon-4 receptor - Group: Receptor

Treated with:

alpha-d-mannose: experimental small molecule (0 associated side effects)

known side effects mediated through drugs targeting this protein:

\*\*\*\*\*  
\*\*\*\*\*

Potassium voltage-gated channel subfamily E member 1 - Group: Channel

Treated with:

indapamide: approved small molecule (192 associated side effects) For the treatment of hypertension, alone or in combination with other antihypertensive drugs, as well as for the treatment of salt and fluid retention associated with congestive heart failure or edema from pregnancy (appropriate only in the management of edema of pathologic origin during pregnancy when clearly needed). Also used for the management of edema as a result of various causes.

192 known side effects mediated through drugs targeting this protein:

Abdominal discomfort Abdominal pain Abdominal pain upper Acne  
Agitation Agranulocytosis Amblyopia Amnesia Anaemia  
Anaphylactic shock Angina pectoris Angioedema Anxiety  
Aplastic anaemia Application site reaction Arrhythmia  
Arthralgia Arthritis Arthropathy Asthenia Ataxia  
Atrial fibrillation Atrial flutter Back pain Blister  
Blood uric acid increased Body temperature increased Bone  
disorder Bone pain Bradycardia Bronchitis Bundle branch block  
Candidiasis Cardiac fibrillation Cardiac flutter Cataract  
Cerebrovascular accident Chest pain Chondrodystrophy Coma  
Conjunctivitis Constipation Cough Decreased appetite  
Dermatitis bullous Dermatitis exfoliative Diabetes mellitus  
Diabetic hyperosmolar coma Diarrhoea Discomfort Disturbance  
in sexual arousal Dizziness Dry mouth Duodenitis Dysgeusia  
Dysmenorrhoea Dyspepsia Dysphagia Dyspnoea Dysuria  
Ear disorder Ear infection Ear pain Ecchymosis  
Electrocardiogram normal Electrolyte imbalance Erectile  
dysfunction Erythema Erythema multiforme Extrasystoles Face

oedema      Fatigue      Feeling abnormal      Flatulence      Flushing  
           Gastritis      Gastroenteritis      Gastrointestinal pain      Glycosuria  
           Gout      Headache      Heart rate irregular      Hepatic function  
 abnormal      Hepatitis      Hernia      Hyperaesthesia      Hyperglycaemia  
           Hyperhidrosis      Hypertonia      Hyperuricaemia      Hypoaesthesia  
           Hypochloraemia      Hypokalaemia      Hyponatraemia      Hypotension  
           Ill-defined disorder      Increased appetite      Infection  
           Influenza      Insomnia      Irritability      Jaundice      Jaundice  
 cholestatic      Laryngitis      Lethargy      Leukopenia      Libido decreased      Liver  
 function test abnormal      Loss of consciousness      Lung disorder  
           Malaise      Migraine      Muscle spasms      Muscle twitching  
           Muscular weakness      Musculoskeletal discomfort      Myalgia  
           Myopathy      Myopia      Nail disorder      Nasopharyngitis  
           Nausea      Neoplasm malignant      Nephritis      Nervousness  
           Neuritis      Neuropathy peripheral      Nocturia      Nodule  
           Oedema peripheral      Oesophagitis      Oliguria      Optic neuritis  
           Oral candidiasis      Orthostatic hypotension      Osteoarthritis  
           Pain      Palpitations      Pancreatitis      Paraesthesia oral  
           Pharyngitis      Photophobia      Photosensitivity reaction      Pneumonia  
           Pollakiuria      Polyuria      Proctitis      Prostatic disorder  
           Pruritus      Purpura      Rash      Renal failure      Renal pain  
           Respiratory distress      Rhabdomyolysis      Rhinitis      Rhinorrhoea  
           Sensory loss      Shock      Sialoadenitis      Sinus bradycardia  
           Sinusitis      Skin mass      Somnolence      Stomatitis      Supraventricular  
 tachycardia      Syncope      Tachycardia      Tension      Thrombocytopenia  
           Thyroid disorder      Tinnitus      Tooth disorder      Toxic epidermal  
 necrolysis      Tubulointerstitial nephritis      Urinary tract infection  
           Urine output increased      Urticaria      Vaginal infection      Vaginal  
 inflammation      Vascular purpura      Vasculitis      Vasculitis necrotising  
           Vasodilation procedure      Ventricular arrhythmia      Ventricular  
 extrasystoles      Vertigo      Vision blurred      Visual impairment  
           Vomiting      Weight decreased      Xanthopsia

\*\*\*\*\*  
 \*\*\*\*\*

Sodium channel subunit beta-1 - Group: Channel

Treated with:

zonisamide: approved      small molecule      (190 associated side  
 effects)      For use as adjunctive treatment of partial seizures in  
 adults with epilepsy.

190 known side effects mediated through drugs targeting this protein:

Abdominal pain      Abnormal dreams      Acne      Agitation      Alanine  
 aminotransferase increased      Albuminuria      Alopecia      Amblyopia  
           Amenorrhoea      Anaemia      Anxiety      Apnoea      Arthralgia  
           Arthritis      Aspartate aminotransferase increased      Asthenia  
           Ataxia      Atrial fibrillation      Bladder pain      Blood  
 lactate dehydrogenase increased      Bradycardia      Calculus bladder  
           Cardiac failure      Cardiac fibrillation      Cerebrovascular  
 accident      Chest pain      Cholangitis      Cholecystitis      Cholelithiasis  
           Cognitive disorder      Colitis      Confusional state  
           Conjunctivitis      Constipation      Convulsion      Coordination  
 abnormal      Cough      Deafness      Decreased appetite      Dehydration  
           Depressed level of consciousness      Dermatitis      Dermatitis  
 bullous      Diarrhoea      Diplopia      Discomfort      Disturbance in sexual

arousal      Dizziness    Dry mouth    Dry skin      Duodenal ulcer  
              Duodenitis    Dysarthria    Dysgeusia    Dyskinesia    Dyspepsia  
              Dysphagia    Dyspnoea     Dystonia     Dysuria       Ecchymosis  
              Eczema        Embolism     Encephalopathy    Enuresis     Erectile  
dysfunction Euphoric mood      Extrasystoles      Face oedema    Faecal  
incontinence      Fatigue      Feeling abnormal    Flank pain    Flatulence  
              Gait disturbance    Gastritis      Gastroenteritis    Gastrointestinal  
pain      Gingival bleeding    Gingival hyperplasia    Gingivitis    Glaucoma  
              Glossitis      Gynaecomastia      Haematemesis      Haematuria  
              Haemoglobin    Haemoptysis    Haemorrhage    Headache      Hirsutism  
              Hyperaesthesia    Hyperhidrosis      Hyperkinesia      Hyperplasia  
              Hyperreflexia    Hypersensitivity    Hypertension      Hypertonia  
              Hypoglycaemia    Hypokinesia    Hyponatraemia      Hypotension  
              Hypotonia      Ill-defined disorder    Immunodeficiency  
              Incontinence      Influenza      Insomnia      Iritis  
              Irritability      Jaundice      Jaundice cholestatic    Leukopenia  
              Libido decreased    Loss of consciousness    Lymphadenopathy  
              Malaise        Mastitis      Melaena      Menorrhagia    Microcytic  
anaemia      Micturition urgency      Mouth ulceration    Movement disorder  
              Muscle relaxant therapy      Muscle rigidity    Muscle spasms  
              Muscle twitching    Muscular weakness    Musculoskeletal discomfort  
              Musculoskeletal stiffness    Myalgia      Myoclonus      Nausea  
              Nervousness    Neuritis      Neuropathy peripheral    Nocturia  
              Nuchal rigidity    Nystagmus      Oculogyric crisis    Oedema  
              Oedema peripheral    Oesophagitis      Osteoarthritis      Pain  
              Palpitations      Paraesthesia oral    Paralysis      Parosmia  
              Petechiae      Pharyngitis    Photophobia    Pollakiuria    Polyuria  
              Pruritus        Psychotic disorder      Pulmonary embolism      Rash  
              Rash maculo-papular      Rash pustular      Rectal haemorrhage  
              Rhinitis        Scotoma        Shock      Somnolence    Speech disorder  
              Stomatitis    Syncope        Systemic lupus erythematosus    Tachycardia  
              Tension        Thirst        Thrombocytopenia    Thrombophlebitis  
              Tinnitus        Tremor        Ulcer      Urinary incontinence    Urinary  
retention    Urine output increased    Urticaria      VIIth nerve paralysis  
              Vascular insufficiency    Ventricular extrasystoles      Vertigo  
              Vomiting        Weight decreased    Weight increased

\*\*\*\*\*  
\*\*\*\*\*

Glutamate [NMDA] receptor subunit epsilon-2 - Group: Channel

Treated with:

l-glutamic acid: approved, nutraceutical small molecule (0 associated side effects) Considered to be nature's "Brain food" by improving mental capacities; helps speed the healing of ulcers; gives a "lift" from fatigue; helps control alcoholism, schizophrenia and the craving for sugar.

meperidine: approved small molecule (50 associated side effects)  
Used to control moderate to severe pain.

haloperidol: approved small molecule (79 associated side effects) For the management of psychotic disorders (eg. schizophrenia) and delirium, as well as to control tics and vocal utterances of Tourette's syndrome (Gilles de la Tourette's syndrome). Also used for the treatment of severe behavioural problems in children with disruptive behaviour disorder or ADHD (attention-deficit hyperactivity disorder). Haloperidol has been used in the prevention and control of severe nausea and vomiting.



felbamate: approved small molecule (249 associated side effects) For use only in those patients who respond inadequately to alternative treatments and whose epilepsy is so severe that a substantial risk of aplastic anemia and/or liver failure is deemed acceptable in light of the benefits conferred by its use.

memantine: approved small molecule (250 associated side effects) For the treatment of moderate to severe dementia of the Alzheimer's type.

tenocyclidine: illicit, experimental small molecule (0 associated side effects) Because of its high affinity for the phencyclidine binding site on the NMDA receptor, the 3H radiolabelled form of tenocyclidine is widely used in research into NMDA receptors.

405 known side effects mediated through drugs targeting this protein:

Abdominal pain Acne Acute coronary syndrome Acute leukaemia  
Affect lability Aggression Agitation Agranulocytosis  
Akathisia Alanine aminotransferase increased Alopecia  
Altered state of consciousness Amnesia Anaemia  
Anaphylactic shock Anaphylactoid reaction Anencephaly  
Angina pectoris Angiopathy Antinuclear antibody positive  
Anxiety Aortic dissection Apathy Aphasia Apnoea  
Argininosuccinate synthetase deficiency Arrhythmia Arrhythmia  
supraventricular Arthralgia Aspartate aminotransferase increased  
Aspiration Asthenia Asthma Ataxia Atrial  
fibrillation Atrioventricular block Azotaemia Back pain  
Blepharitis Blindness Blood alkaline phosphatase increased  
Blood creatinine increased Blood lactate dehydrogenase  
increased Body temperature decreased Body temperature increased  
Bradycardia Brain oedema Breast engorgement Breast  
feeding Breast pain Bronchitis Bronchospasm Cardiac arrest  
Cardiac disorder Cardiac failure Cardiac fibrillation  
Carpal tunnel syndrome Cataract Catatonia Cellulitis  
Cerebral haemorrhage Cerebral infarction Cerebrovascular  
accident Cerebrovascular disorder Chest pain Chills  
Cholelithiasis Choreoathetosis Coagulopathy Colitis  
Coma Completed suicide Confusional state Congenital anomaly  
Congenital genital malformation Conjunctival haemorrhage  
Conjunctivitis Connective tissue disorder Constipation  
Convulsion Coordination abnormal Corneal opacity Cough  
Crocodile tears syndrome Crying Deafness Death  
Decreased appetite Deep vein thrombosis Dehydration  
Delirium Delusion Depersonalisation Depressed level of  
consciousness Dermatitis Dermatitis bullous Developmental  
delay Diabetes mellitus Diarrhoea Diplopia Discomfort  
Disorientation Disseminated intravascular coagulation  
Dissociation Disturbance in attention Disturbance in  
sexual arousal Diverticulitis Dizziness Drug interaction Drug  
withdrawal syndrome Dry mouth Dysarthria Dysgeusia Dyskinesia  
Dyspepsia Dysphagia Dysphoria Dyspnoea Dystonia  
Dysuria Ear infection Eczema Effusion Elastosis  
perforans Electrocardiogram QT prolonged Electrocardiogram  
change Embolism Encephalocele Encephalopathy Endocrine  
disorder Enteritis Eosinophilia Epistaxis Erectile

dysfunction Erythema multiforme Euphoric mood Extrapyrarnidal  
disorder Eye pain Eyelid ptosis Face oedema Faecal  
incontinence Fatigue Feeling abnormal Flat affect Flatulence  
Flushing Foetal disorder Gait disturbance Gangrene  
Gastric dilatation Gastric ulcer Gastritis  
Gastroenteritis Gastrointestinal disorder Gastrointestinal  
haemorrhage Gastrointestinal pain Gastrooesophageal reflux disease  
Gingival bleeding Glaucoma Glossitis Grand mal convulsion  
Gynaecomastia Haematemesis Haematuria Haemoglobin  
Haemolytic anaemia Haemolytic uraemic syndrome Haemoptysis  
Haemorrhage Haemorrhage intracranial Hallucination  
Headache Hearing impaired Hemianopia Hemiplegia Hepatic  
failure Hepatic function abnormal Hepatitis Hepatitis  
cholestatic Hepatobiliary disease Hepatorenal syndrome Hiccups  
Hormone level abnormal Hyperaemia Hyperammonaemia  
Hyperglycaemia Hyperhidrosis Hyperkinesia  
Hyperlipidaemia Hypernatraemia Hyperpyrexia  
Hypersensitivity Hypertension Hypertonia Hypoaesthesia  
Hypocalcaemia Hypochromic anaemia Hypoglycaemia  
Hypokalaemia Hypokinesia Hypomagnesaemia Hyponatraemia  
Hypophosphataemia Hypotension Hypothermia Hypoxia Ileus Ill-  
defined disorder Inappropriate antidiuretic hormone secretion  
Incontinence Increased appetite Induration Infarction  
Infection Infestation Influenza Injection site pain  
Insomnia Intermittent claudication International  
normalised ratio increased Intestinal obstruction Intra-uterine  
death Irritability Ischaemia Jaundice Lacrimation increased  
Laryngospasm Lethargy Leukaemia Leukocytosis  
Leukopenia Libido increased Lichen planus Livedo  
reticularis Lividity Loss of consciousness Lymphadenopathy  
Lymphoma Lymphoproliferative disorder Macular degeneration  
Macule Malaise Mania Mean cell volume Mean cell volume  
increased Mediastinal disorder Megacolon Melaena Menstrual  
disorder Menstruation irregular Mental disability Mental disorder  
due to a general medical condition Microcephaly Migraine  
Miosis Mononeuritis Mood swings Mouth ulceration  
Mucous membrane disorder Muscle contractions involuntary  
Muscle spasms Muscle spasticity Muscle twitching Muscular  
weakness Musculoskeletal discomfort Myalgia Myeloid leukaemia  
Myocardial infarction Myoclonus Myopia Nasopharyngitis  
Nausea Necrosis Necrosis ischaemic Neoplasm  
Nephrotic syndrome Nervous system disorder Nervousness  
Neuralgia Neuroleptic malignant syndrome Neuropathy  
peripheral Neurosis Neutropenia Nightmare Nystagmus Obstruction  
Oculogyric crisis Oedema Oedema mucosal Oedema peripheral  
Oesophageal disorder Oesophageal ulcer Oesophagitis  
Opisthotonus Orthostatic hypotension Osteoarthritis  
Osteonecrosis Otitis media Pain Pain in extremity  
Palpitations Pancreatitis Pancreatitis acute  
Pancytopenia Paraesthesia Paralysis Paranoia  
Peripheral ischaemia Personality disorder Pharyngitis  
Phlebitis Photosensitivity allergic reaction Photosensitivity  
reaction Placental disorder Platelet disorder Pleural disorder  
Pleural effusion Pneumonia Pneumonia aspiration Priapism  
Prothrombin time shortened Protrusion tongue Pruritus

Psychotic disorder      Pulmonary embolism      Pulmonary  
 function test decreased      Pulmonary haemorrhage      Pulmonary oedema  
 Purpura      Rash      Rash erythematous      Rash papular      Rectal  
 haemorrhage      Renal failure acute      Renal function test abnormal      Renal  
 impairment      Respiratory arrest      Respiratory depression      Respiratory  
 failure      Respiratory tract infection      Retinal detachment  
 Retinal disorder      Retinal haemorrhage      Rhabdomyolysis  
 Rhinitis      Salivary hypersecretion      Sedation      Sepsis  
 Shock      Sinusitis      Skin disorder      Skin odour abnormal      Skin  
 ulcer      Sleep disorder      Somnolence      Status epilepticus      Stevens-  
 Johnson syndrome      Stomach dilation procedure      Stomatitis      Stupor  
 Sudden death      Sudden infant death syndrome      Suicidal ideation  
 Suicide attempt      Supraventricular tachycardia      Swelling  
 Syncope      Tachycardia      Tardive dyskinesia      Tension  
 Thinking abnormal      Throat tightness      Thrombocytopenia  
 Thrombocytopenic purpura      Thrombophlebitis      Thrombosis  
 Thrombotic thrombocytopenic purpura      Tinnitus      Torsade de  
 pointes      Toxic epidermal necrolysis      Transient ischaemic attack  
 Tremor      Ulcer      Upper respiratory tract infection      Urethral  
 disorder      Urinary incontinence      Urinary retention      Urinary tract  
 disorder      Urinary tract infection      Urticaria      Uterovaginal  
 prolapse      Vaginal haemorrhage      Vascular dementia      Vascular purpura  
 Vasculitis      Venous thrombosis      Vertigo      Vision blurred  
 Visual acuity reduced      Visual impairment      Vomiting      Weight  
 decreased      Weight increased      X-linked lymphoproliferative syndrome  
 Xerophthalmia

\*\*\*\*\*  
 \*\*\*\*\*

Sodium channel protein type 1 subunit alpha - Group: Channel

Treated with:

phenytoin: approved      small molecule      (247 associated side  
 effects)      For the control of generalized tonic-clonic (grand mal)  
 and complex partial (psychomotor, temporal lobe) seizures and  
 prevention and treatment of seizures occurring during or following  
 neurosurgery.

topiramate: approved      small molecule      (365 associated side  
 effects)      Used for the treatment and control of partial seizures  
 and severe tonic-clonic (grand mal) seizures and also for the  
 prevention of migraine headaches. In children it is also used for  
 treatment of Lennox-Gastaut syndrome.

zonisamide: approved      small molecule      (190 associated side  
 effects)      For use as adjunctive treatment of partial seizures in  
 adults with epilepsy.

phenacemide:      approved      small molecule      (0 associated side  
 effects)      Used to control certain seizures in the treatment of  
 epilepsy.

phenazopyridine: approved      small molecule      (20 associated side  
 effects)      For the symptomatic relief of pain, burning, urgency,  
 frequency, and other discomforts arising from irritation of the  
 lower urinary tract mucosa caused by infection, trauma, surgery,  
 endoscopic procedures, or the passage of sounds or catheters.

nitrazepam: approved      small molecule      (44 associated side effects)

Used to treat short-term sleeping problems (insomnia), such as  
 difficulty falling asleep, frequent awakenings during the night, and  
 early-morning awakening.

permethrin: approved small molecule (17 associated side effects)  
For the treatment of infestation with <i>Sarcoptes scabiei</i> (scabies).

508 known side effects mediated through drugs targeting this protein:

Abdominal discomfort Abdominal distension Abdominal pain  
Abnormal dreams Acidosis Acne Affect lability Ageusia  
Aggression Agitation Agranulocytosis Akathisia Alanine  
aminotransferase increased Albuminuria Alcohol intolerance  
Alkalosis Alopecia Amblyopia Amenorrhoea Amnesia  
Anaemia Anaemia megaloblastic Anaphylactic shock  
Anaphylactoid reaction Anger Angina pectoris Angiopathy Angle  
closure glaucoma Anorectal discomfort Anxiety Apathy  
Aphasia Apnoea Apraxia Arrhythmia Arthralgia  
Arthritis Arthropathy Aspartate aminotransferase increased  
Aspiration Asterixis Asthenia Asthma Ataxia  
Atelectasis Atrial fibrillation Atrial flutter  
Atrioventricular block Autonomic neuropathy Back pain Basal  
cell carcinoma Bipolar I disorder Bipolar disorder Bladder  
disorder Bladder pain Blindness Blister Blood alkaline  
phosphatase increased Blood creatinine increased Blood lactate  
dehydrogenase increased Body temperature decreased Body  
temperature increased Bone pain Bradycardia Brain oedema  
Breast discharge Breast disorder female Breast pain Breath  
odour Bronchitis Bronchospasm Bundle branch block Cachexia  
Calculus bladder Candidiasis Cardiac arrest Cardiac failure  
Cardiac failure congestive Cardiac fibrillation Cardiac  
flutter Cardiomegaly Cardiovascular disorder Cataract  
Cerebellar syndrome Cerebral haemorrhage Cerebral  
infarction Cerebrovascular accident Chest pain Chills  
Chloasma Cholangitis Cholecystitis Cholelithiasis  
Chorea Coagulopathy Cognitive disorder Colitis  
Collagen disorder Colour blindness Coma Completed suicide  
Confusional state Congenital eye disorder Conjunctivitis  
Connective tissue disorder Constipation Convulsion  
Coordination abnormal Cough Cryptococcosis Cyanosis  
Cystitis Cystitis noninfective Cytolytic hepatitis  
Deafness Death Decreased appetite Deep vein thrombosis  
Dehydration Delirium Delirium tremens Delusion Dental  
caries Depersonalisation Depressed level of consciousness  
Depression Dermatitis bullous Dermatitis contact  
Diabetes insipidus Diabetes mellitus Diabetic neuropathy  
Diarrhoea Diplopia Discomfort Disorientation Disturbance  
in attention Disturbance in sexual arousal Dizziness Drug  
interaction Drug rash with eosinophilia and systemic symptoms Drug  
withdrawal syndrome Dry mouth Dry skin Duodenal ulcer  
Duodenitis Dysarthria Dysgeusia Dyskinesia Dysmenorrhoea  
Dyspepsia Dysphagia Dysphonia Dyspnoea Dystonia  
Dysuria Ear infection Ear pain Ecchymosis Eczema  
Ejaculation disorder Electroencephalogram abnormal  
Embolism Emotional disorder Emotional distress  
Encephalitis Encephalopathy Endocrine disorder  
Enuresis Eosinophilia Epidermodysplasia verruciformis  
Epilepsy Epistaxis Erectile dysfunction Eructation

Erythema multiforme Euphoric mood Expressive language  
 disorder Extensor plantar response Extrapyrarnidal disorder  
 Extrasystoles Extravasation Eye disorder Eye pain  
 Eyelid ptosis Face oedema Faecal incontinence Fatigue  
 Feeling abnormal Flank pain Flat affect Flatulence Fluid  
 retention Flushing Folliculitis Gait disturbance Gallbladder  
 disorder Gastric disorder Gastritis Gastroenteritis  
 Gastrointestinal disorder Gastrointestinal haemorrhage  
 Gastrointestinal pain Gastrooesophageal reflux disease  
 Generalised oedema Genital candidiasis Genital discharge  
 Gingival bleeding Gingival hyperplasia Gingivitis Glaucoma  
 Glossitis Goitre Grand mal convulsion Gynaecomastia  
 Haematemesia Haematoma Haematuria Haemoglobin Haemolytic  
 anaemia Haemoptysis Haemorrhage Haemorrhoids Hair texture  
 abnormal Hallucination Hangover Headache Hearing impaired  
 Hemiplegia Hepatic enzyme increased Hepatic failure  
 Hepatic function abnormal Hepatitis Hepatocellular injury  
 Hiccups Hirsutism Hormone level abnormal Hostility Hot  
 flush Hyperacusis Hyperaesthesia Hyperammonaemia Hyperchloraemia  
 Hyperglycaemia Hyperhidrosis Hyperkalaemia  
 Hyperkinesia Hyperlipidaemia Hypernatraemia Hyperplasia  
 Hyperreflexia Hypersensitivity Hypertension  
 Hyperthermia Hypertonia Hypertrichosis Hypertrophy  
 Hyperventilation Hypoaesthesia Hypocalcaemia  
 Hypocholesterolaemia Hypochromic anaemia Hypoglycaemia  
 Hypohidrosis Hypokalaemia Hypokinesia Hyponatraemia  
 Hypophosphataemia Hyporeflexia Hypotension Hypothermia  
 Hypotonia Hypoxia Ileus Ill-defined disorder  
 Immunodeficiency Incontinence Increased appetite  
 Increased bronchial secretion Infarction Infection  
 Inflammation Influenza Insomnia Intracranial pressure  
 increased Iritis Irritability Jaundice Jaundice  
 cholestatic Ketosis Lacrimal disorder Lacrimation increased  
 Laryngospasm Lethargy Leukocytosis Leukopenia  
 Libido decreased Libido increased Liver function test abnormal  
 Liver injury Loss of consciousness Lymphadenopathy  
 Lymphocytosis Lymphoma Lymphopenia Macrocytosis  
 Maculopathy Malaise Mania Mastitis Melaena Memory  
 impairment Meningitis Meningitis aseptic Menopausal symptoms  
 Menorrhagia Menstrual disorder Mental disability Mental  
 disorder Metabolic acidosis Methaemoglobinaemia  
 Metrorrhagia Microcytic anaemia Micturition urgency  
 Migraine Mood swings Mouth ulceration Movement disorder  
 Muscle contractions involuntary Muscle relaxant therapy  
 Muscle rigidity Muscle spasms Muscle spasticity Muscle  
 twitching Muscular weakness Musculoskeletal discomfort  
 Musculoskeletal disorder Musculoskeletal pain  
 Musculoskeletal stiffness Myalgia Mydriasis Myoclonus  
 Myopathy Myopia Nail disorder Nausea Necrosis  
 Neoplasm Neoplasm malignant Nephrolithiasis Nervous  
 system disorder Nervousness Neuritis Neuropathy peripheral  
 Neurosis Neutropenia Nightmare Nocturia Nodule  
 Nuchal rigidity Nystagmus Obesity Oculogyric crisis  
 Oedema genital Oedema peripheral Oesophagitis Oliguria  
 Orthostatic hypotension Osteoarthritis Osteoarthropathy

Osteomalacia      Osteoporosis      Otitis media      Pain Pain  
 in extremity      Pallor      Palpitations      Pancreatitis  
 Pancytopenia      Paraesthesia oralParalysis      Paranoia  
 Parosmia      Pelvic pain Pemphigus      Personality disorder  
 Petechiae      Pharyngitis Phlebitis      Photophobia Photosensitivity  
 reaction      Pneumonia aspiration      Pneumothorax      Poisoning  
 Pollakiuria Polyarteritis nodosa      Polycythaemia  
 Polyneuropathy      Polyuria      Premature ejaculation      Proctalgia  
 Prostatic disorder      Prothrombin level increased      Pruritus  
 Pseudolymphoma      Psychotic disorder      Pulmonary embolism  
 Purpura      Rash Rash erythematousRash maculo-papular      Rash  
 morbilliform      Rash pustular      Rectal haemorrhage      Rectal  
 tenesmus      Renal failure      Renal pain      Renal tubular acidosis Renal  
 tubular disorder      Respiratory disorder      Respiratory tract infection  
 Rhinitis      Road traffic accident      Salivary hypersecretion  
 Scotoma      Seborrhoeic dermatitis      Sedation      Sensory  
 disturbance Sensory loss      Sepsis      Shock Sinus bradycardia  
 Sinusitis      Skin discolouration      Skin disorder      Skin mass  
 Skin odour abnormal      Sleep disorder      Somnolence Speech  
 disorder      Sputum increased      Stomatitis      Strabismus Stupor  
 Subdural haematoma      Sudden death      Suicidal behaviour  
 Suicidal ideationSuicide attempt      Sulphaemoglobinaemia  
 Syncope      Systemic lupus erythematosus Tachycardia Temperature  
 intoleranceTenderness Tension      Testicular disorder      Thinking  
 abnormal      Thirst      Thrombocytopenia Thrombocytosis  
 Thrombophlebitis Thrombosis Thyroid disorder Tinnitus  
 Tongue disorder      Tongue oedema      Tongue paralysis Tooth  
 disorder      Toothache      Toxic epidermal necrolysis      Tremor      Ulcer  
 Unintended pregnancy      Upper motor neurone lesion      Upper  
 respiratory tract infection      Urethral disorderUrethral pain  
 Urinary incontinence      Urinary retentionUrinary tract disorder  
 Urinary tract infection      Urine abnormalityUrine analysis  
 abnormal      Urine output increased      Urticaria      Uterovaginal prolapse  
 VIIth nerve paralysis      Vaginal haemorrhage      Vaginal infection  
 Vaginal inflammation      Vascular insufficiency Vascular purpura  
 Vasodilation procedure Vasospasm      Venous thrombosisVentricular  
 extrasystoles      Ventricular fibrillation      Vertigo      Viral  
 infection      Vision blurred      Visual acuity reduced      Visual impairment  
 Vomiting      Vulvovaginal candidiasis      Vulvovaginal mycotic  
 infection      Weight decreased      Weight increased      Xerophthalmia

\*\*\*\*\*  
 \*\*\*\*\*

Solute carrier organic anion transporter family member 1B3 - Group:  
 Transporter

Treated with:  
 valsartan: approved      small molecule      (80 associated side effects)  
 May be used as a first line agent to treat uncomplicated  
 hypertension, isolated systolic hypertension and left ventricular  
 hypertrophy. May be used as a first line agent to delay progression  
 of diabetic nephropathy. Losartan may be also used as a second line  
 agent in the treatment of congestive heart failure, systolic  
 dysfunction, myocardial infarction and coronary artery disease in  
 those intolerant of ACE inhibitors.  
 olmesartan: approved      small molecule      (0 associated side effects)  
 For the treatment of hypertension.

liothyronine: approved small molecule (0 associated side effects) Used as replacement or supplemental therapy in patients with hypothyroidism of any etiology, except transient hypothyroidism during the recovery phase of subacute thyroiditis.

conjugated estrogens: approved small molecule (219 associated side effects) For the treatment of moderate to severe vasomotor symptoms associated with the menopause, atrophic vaginitis, osteoporosis, hypoestrogenism due to hypogonadism, castration, primary ovarian failure, breast cancer (for palliation only), and Advanced androgen-dependent carcinoma of the prostate (for palliation only)

digoxin: approved small molecule (56 associated side effects) For the treatment and management of congestive cardiac insufficiency, arrhythmias and heart failure.

casopfungin: approved small molecule (76 associated side effects) For the treatment of esophageal candidiasis and invasive aspergillosis in patients who are refractory to or intolerant of other therapies.

methotrexate: approved small molecule (209 associated side effects) For the treatment of gestational choriocarcinoma, chorioadenoma destruens and hydatidiform mole. Also for the treatment of severe psoriasis and severe, active, classical or definite rheumatoid arthritis.

rifampin: approved small molecule (0 associated side effects) For the treatment of Tuberculosis and Tuberculosis-related mycobacterial infections.

ouabain: approved small molecule (0 associated side effects) For the treatment of atrial fibrillation and flutter and heart failure

pioglitazone: approved small molecule (36 associated side effects) Treatment of Type II diabetes mellitus

liotrix: approved small molecule (0 associated side effects) May be used to treat primary, secondary or tertiary hypothyroidism. May also be used to suppress thyroid stimulating hormone (TSH) secretion in patients with simple (nontoxic) goiter, subacute or chronic lymphocytic thyroiditis multinodular goiter, and in the management of thyroid cancer. May be used in conjunction with other antithyroid agents to treat thyrotoxicosis to prevent goitrogenesis and hypothyroidism. May also be used for differential diagnosis of suspected mild hyperthyroidism or thyroid gland autonomy.

cholic acid: experimental small molecule (0 associated side effects)

taurocholic acid: experimental small molecule (0 associated side effects)

445 known side effects mediated through drugs targeting this protein:

5q minus syndrome  
Abdominal discomfort Abdominal distension  
Abdominal pain Abdominal pain upper Abscess Acne Acute coronary syndrome  
Acute interstitial pneumonitis Acute respiratory distress syndrome  
Affect lability Aggression Agitation  
Agranulocytosis Alanine aminotransferase increased Alopecia  
Alveolitis Alveolitis allergic Alveolitis fibrosing  
Amenorrhoea Anaemia Anaphylactic shock Anaphylactoid

reaction Angioedema Angiopathy Anxiety Apathy Aphasia  
 Aplastic anaemia Arrhythmia Arterial thrombosis Arthralgia  
 Arthropathy Aspartate aminotransferase increased Asthenia  
 Asthma Ataxia Atrial fibrillation Atrial  
 tachycardia Atrioventricular block complete Atrioventricular block  
 first degree Atrioventricular block second degree  
 Atrioventricular dissociation Azoospermia Azotaemia Back  
 pain Benign neoplasm Bladder cancer Bladder neoplasm Bladder  
 pain Blindness Blindness transient Blood albumin decreased  
 Blood alkaline phosphatase increased Blood bicarbonate  
 decreased Blood bilirubin increased Blood creatine phosphokinase  
 increased Blood creatinine increased Blood glucose decreased  
 Blood glucose increased Blood phosphorus increased Blood  
 potassium decreased Blood potassium increased Blood pressure  
 increased Blood triglycerides increased Blood urea increased  
 Blood uric acid increased Body temperature increased Bone  
 disorder Bone pain Bradycardia Breast discharge Breast discomfort  
 Breast disorder Breast enlargement Breast mass Breast  
 neoplasm Breast pain Breast swelling Breast tenderness Bronchitis  
 Bronchospasm Candidiasis Carbohydrate tolerance decreased  
 Cardiac arrest Cardiac disorder Cardiac fibrillation  
 Cardioactive drug level Cell death Cerebral artery  
 thrombosis Cerebral thrombosis Cerebrovascular accident  
 Cervical discharge Cervix disorder Chest pain Chills  
 Chloasma Chorea Cognitive disorder Colitis ischaemic  
 Coma Conduction disorder Confusional state Conjunctivitis  
 Connective tissue disorder Constipation Convulsion  
 Coronary artery thrombosis Cough Cryptococcosis Cyanosis  
 Cystitis Cystitis noninfective Cytomegalovirus infection  
 Death Decreased appetite Deep vein thrombosis Delirium  
 Dementia Dental plaque Depression Dermatitis Dermatitis  
 exfoliative Diabetes mellitus Diabetic retinal oedema Diarrhoea  
 Discomfort Disease progression Dissociation Dizziness  
 Drug interaction Dry eye Dry mouth Dysarthria  
 Dysmenorrhoea Dyspepsia Dysplasia Dyspnoea Dysuria  
 Ear pain Ecchymosis Ectropion of cervix Effusion  
 Electrocardiogram PR prolongation Electrocardiogram ST segment  
 Electrocardiogram ST segment depression Electrocardiogram  
 abnormal Electrocardiogram change Embolism Embolism venous  
 Encephalopathy Endometrial cancer Endometrial  
 hypertrophy Endometriosis Enteritis Eosinophilia Epilepsy  
 Epistaxis Erectile dysfunction Erythema Erythema  
 multiforme Erythema nodosum Extrasystoles Extravasation Eye  
 disorder Fatigue Febrile neutropenia Feeling abnormal  
 Feeling hot Fibrocystic breast disease Fibrosis Flat affect  
 Flatulence Fluid retention Flushing Folliculitis  
 Furuncle Galactorrhoea Gallbladder disorder Gamma-  
 glutamyltransferase decreased Gastritis Gastrointestinal  
 disorder Gastrointestinal necrosis Gastrointestinal pain  
 Gastrointestinal toxicity Generalised oedema Genital  
 discharge Gingivitis Glossitis Glucose tolerance decreased  
 Glucose tolerance impaired Gynaecomastia Haemangioma  
 Haematemesis Haematocrit decreased Haematological  
 malignancy Haematuria Haemoglobin decreased Haemoptysis Haemorrhage  
 Haemorrhagic disorder Hallucination Headache Hemiparesis



Hepatic cirrhosis Hepatic enzyme increased Hepatic failure  
 Hepatic function abnormal Hepatitis Hepatitis acute  
 Hepatobiliary disease Herpes virus infection Herpes zoster  
 Hirsutism Histoplasmosis Hyperbilirubinaemia  
 Hypercalcaemia Hyperglycaemia Hyperhidrosis  
 Hyperkalaemia Hyperlipidaemia Hypernatraemia  
 Hypersensitivity Hypertension Hypertonia  
 Hypertriglyceridaemia Hypertrophy Hyperuricaemia  
 Hypoaesthesia Hypocalcaemia Hypogammaglobulinaemia  
 Hypokalaemia Hypomagnesaemia Hypotension Hypothyroidism  
 Idiopathic pulmonary fibrosis Ill-defined disorder  
 Induration Infarction Infection Infertility Inflammation  
 Influenza Injection site pain Insomnia Interstitial lung  
 disease Intestinal ischaemia Intra-uterine death  
 Irritability Ischaemia Jaundice Jaundice cholestatic  
 Lacrimal disorder Lacrimation increased Laryngitis Leiomyoma  
 Lethargy Leukoencephalopathy Leukopenia Liver function  
 test abnormal Loss of consciousness Loss of libido Lung  
 disorder Lung infection Lymphadenopathy Lymphoma  
 Lymphoproliferative disorder Maculopathy Malaise Mass  
 Melaena Meningioma benign Meningitis Meningitis aseptic  
 Menorrhagia Menstrual disorder Mental disorder Mesenteric  
 vascular insufficiency Metrorrhagia Microcytic anaemia  
 Migraine Mood swings Mouth ulceration Muscle rigidity  
 Muscle spasms Muscular weakness Musculoskeletal discomfort  
 Musculoskeletal pain Musculoskeletal stiffness Myalgia  
 Myocardial infarction Myocardial ischaemia Myositis  
 Nausea Neck pain Necrosis Neoplasm Neoplasm  
 malignant Nephropathy Nerve root lesion Nervous system disorder  
 Nervousness Neuritis Neuropathy peripheral Neutropenia  
 Nipple pain Nocardiosis Nodule Nuchal rigidity Obstruction  
 Obstructive airways disorder Oedema Oedema peripheral  
 Opportunistic infection Optic neuritis Oropharyngeal  
 candidiasis Osteoarthritis Osteonecrosis Osteoporosis  
 Ovarian cancer Pain Pain in extremity Palpitations  
 Pancreatic disorder Pancreatitis Pancytopenia  
 Paraesthesia Paresis Pelvic pain Pericardial effusion  
 Pericarditis Petechiae Pharyngitis Phlebitis  
 Photosensitivity reaction Pigmentation disorder Pleural  
 disorder Pleural effusion Pneumocystis jiroveci pneumonia  
 Pneumonia Pneumonia cytomegaloviral Poisoning Pollakiuria  
 Polyuria Porphyria Precocious puberty Productive cough  
 Protein urine present Proteinuria Pruritus Pruritus genital  
 Psychotic disorder Puberty Pulmonary embolism  
 Pulmonary fibrosis Pulmonary function test decreased  
 Pulmonary oedema Pulmonary toxicity Purpura  
 Radiculopathy Rales Rash Rash generalised Rash maculo-  
 papular Renal failure Renal failure acute Renal impairment  
 Renal tubular disorder Respiratory depression Respiratory  
 distress Respiratory failure Respiratory tract infection  
 Retinal vein thrombosis Retinitis pigmentosa  
 Rhabdomyolysis Rhinitis Sensory loss Sepsis Shock  
 Sinus bradycardia Sinusitis Skin burning sensation Skin  
 exfoliation Skin necrosis Skin ulcer Smear cervix abnormal  
 Social avoidant behaviour Soft tissue necrosis Somnolence

Speech disorder Spinal cord disorder Stomatitis  
Subcutaneous nodule Sudden death Swelling Swelling  
face Syncope Tachycardia Tachypnoea Telangiectasia Tenderness  
Tension Thrombocytopenia Thrombophlebitis superficial  
Thrombosis Tinnitus Tooth abscess Tooth disorder Toxic  
epidermal necrolysis Tremor Tumour lysis syndrome Ulcer Upper  
respiratory tract infection Ureteric obstruction Urethral disorder  
Urinary tract disorder Urinary tract infection Urine  
output increased Urticaria Uterine cancer Uterine cervical  
erosion Uterine leiomyoma Uterine spasm Vaginal discharge  
Vaginal haemorrhage Varicose vein Vasculitis  
Vasodilation procedure Venous thrombosis Ventricular  
extrasystoles Ventricular fibrillation Ventricular  
tachycardia Vertigo Viral infection Vision blurred Visual  
acuity reduced Visual impairment Vomiting Vulvovaginal  
candidiasis Vulvovaginal mycotic infection Vulvovaginal pruritus  
Weight increased Withdrawal bleed X-linked lymphoproliferative  
syndrome Xanthopsia

\*\*\*\*\*  
\*\*\*\*\*

Activin receptor type 1B - Group: Enzyme

Treated with:

adenosine triphosphate: approved, nutraceutical small molecule  
(0 associated side effects) For nutritional supplementation,  
also for treating dietary shortage or imbalance

known side effects mediated through drugs targeting this protein:

\*\*\*\*\*  
\*\*\*\*\*

47 kDa membrane antigen - Group: Other

Treated with:

2,3-di-o-sulfo-alpha-d-gluco-pyranose: experimental small  
molecule (0 associated side effects)

known side effects mediated through drugs targeting this protein:

\*\*\*\*\*  
\*\*\*\*\*

Insulin receptor - Group: Enzyme

Treated with:

insulin recombinant: approved biotech (0 associated side  
effects) For treatment of Type I and II diabetes mellitus.

insulin lispro: approved biotech (49 associated side effects)

For the treatment of Type 1 or 2 diabetes mellitus. To be used  
in conjunction with an intermediate or long-acting insulin except  
when used in a continuous insulin infusion pump.

insulin glargine: approved biotech (54 associated side effects)

For the treatment of Type 1 or 2 diabetes mellitus in patients  
over 17 years old who require a long-acting (basal) insulin for the  
control of hyperglycemia. May be used in pediatric patients with  
Type 1 diabetes mellitus who require a long-acting (basal) insulin  
for glycemic control.

insulin, porcine: approved biotech (0 associated side effects)

For the treatment of type I and II diabetes mellitus.

mecasermin: approved biotech (0 associated side effects) For the long-term treatment of growth failure in pediatric patients with Primary IGFD or with GH gene deletion who have developed neutralizing antibodies to GH. It is not indicated to treat Secondary IGFD resulting from GH deficiency, malnutrition, hypothyroidism or other causes; it is not a substitute for GH therapy.

insulin aspart: approved biotech (42 associated side effects) For the treatment of Type 1 or 2 diabetes mellitus. Should normally be used in conjunction with an intermediate or long-acting insulin.

insulin detemir: approved biotech (0 associated side effects) For the treatment of type 1 or 2 diabetes mellitus. May be used in combination with oral anti-diabetic agents in type 2 diabetic patients who are not in adequate metabolic control with oral anti-diabetic agents alone.

insulin glulisine: approved biotech (0 associated side effects) For the treatment of Type 1 and 2 diabetes mellitus. Should be used in regimens including a long-acting or basal insulin analogue unless it is used in a continuous infusion pump. May be used with oral antidiabetic agents.

adenosine-5'-[beta, gamma-methylene]triphosphate: experimental small molecule (0 associated side effects)

[4-({5-(aminocarbonyl)-4-[(3-methylphenyl)amino]pyrimidin-2-yl}amino)phenyl]acetic acid: experimental small molecule (0 associated side effects)

81 known side effects mediated through drugs targeting this protein:

Abdominal pain Anaphylactic shock Angioedema Angiopathy  
Arthralgia Asthenia Back pain Body temperature increased  
Bone pain Bronchitis Bronchospasm Cataract Chest pain  
Coma Cough Death Dermatitis Diabetic retinopathy Diarrhoea  
Disease progression Drug hypersensitivity Dysmenorrhoea  
Dyspepsia Dyspnoea Erythema Gastrointestinal pain  
Glycosuria Headache Hyperhidrosis Hypernatraemia  
Hypersensitivity Hypertension Hypertrophy Hypoglycaemia  
Hypokalaemia Hyporeflexia Hypotension Infection  
Inflammation Influenza Infusion site reaction Injection  
site pain Injection site reaction Ketosis Lipoatrophy  
Lipodystrophy acquired Lipohypertrophy Loss of consciousness  
Musculoskeletal discomfort Myalgia Nausea Neuropathy  
peripheral Normal pressure hydrocephalus Obstruction Oedema  
Oedema peripheral Onychomycosis Pain Pain in extremity  
Pharyngitis Polyarteritis nodosa Pruritus Rash Refraction  
disorder Respiratory tract infection Retinal disorder Retinal  
vascular disorder Rhinitis Sensory disturbance Shock Sinusitis  
Skin disorder Swelling Tachycardia Type 1 diabetes  
mellitus Type 2 diabetes mellitus Upper respiratory tract  
infection Urinary tract infection Urticaria Weight increased  
Wheezing

\*\*\*\*\*  
\*\*\*\*\*

Low affinity immunoglobulin gamma Fc region receptor III-B - Group:  
Receptor  
Treated with:

cetuximab: approved biotech (0 associated side effects) For treatment of EGFR-expressing metastatic colorectal cancer in patients who are refractory to other irinotecan-based chemotherapy regimens. Cetuximab is also indicated for treatment of squamous cell carcinoma of the head and neck in conjunction with radiation therapy.

etanercept: approved biotech (0 associated side effects) For treatment of severe active rheumatoid arthritis in adults, severe juvenile idiopathic arthritis, ankylosing spondylitis, and severe plaque psoriasis.

intravenous immunoglobulin: approved biotech (0 associated side effects) IVIg is used in the treatment of immunodeficiencies, as well as autoimmune and inflammatory disorders. These indications includes idiopathic thrombocytopenic purpura, Kawasaki disease, hypogammaglobulinemia, B cell chronic lymphocytic leukemia, bone marrow transplant complications, Guillain-Barré syndrome, chronic inflammatory demyelinating polyneuropathy (CIDP), multiple sclerosis, rheumatoid arthritis, myesthesia gravis, Wiskott-Aldrich syndrome and inflammatory skin diseases.

adalimumab: approved biotech (0 associated side effects) For treatment of rheumatoid arthritis, psoriatic arthritis, ankylosing spondylitis, and Crohn's disease.

abciximab: approved biotech (0 associated side effects)  
gemtuzumab ozogamicin: approved biotech (0 associated side effects) For treatment of CD33-positive acute myeloid leukemia in patients 60 and over who are not candidates for other chemotherapy.

trastuzumab: approved biotech (0 associated side effects)  
For treatment of early stage HER2-positive breast cancer, or metastatic breast cancer that substantially overexpress HER2.

rituximab: approved biotech (0 associated side effects) For treatment of CD20-positive non-Hodgkins lymphoma, chronic lymphocytic leukemia, and rheumatoid arthritis.

basiliximab: approved biotech (0 associated side effects)  
For prophylactic treatment of kidney transplant rejection

muromonab: approved biotech (0 associated side effects) For treatment of organ transplant recipients, prevention of organ rejection

ibrutumomab: approved biotech (0 associated side effects)  
For treatment of non-Hodgkin's lymphoma

tositumomab: approved biotech (0 associated side effects)  
For treatment of non-Hodgkin's lymphoma (CD20 positive, follicular)

alemtuzumab: approved biotech (0 associated side effects)  
Alemtuzumab (Campath) is a monoclonal antibody therapy used for treatment of B-cell chronic lymphocytic leukemia.

alefacept: approved biotech (0 associated side effects) As an immunosuppressive drug, Alefacept can be used for treatment of moderate to severe chronic plaque psoriasis

efalizumab: approved biotech (0 associated side effects) For the treatment of adult patients with moderate to severe chronic plaque psoriasis, who are candidates for phototherapy or systemic therapy.

natalizumab: approved biotech (0 associated side effects)  
For treatment of multiple sclerosis.

palivizumab: approved biotech (0 associated side effects)  
For prophylaxis of respiratory diseases caused by respiratory syncytial virus.

daclizumab: approved biotech (0 associated side effects)  
Zenapax is a humanized monoclonal antibody used for prevention of renal transplant rejection

bevacizumab: approved biotech (0 associated side effects)  
As part of combination therapy for metastatic colorectal cancer and HER2-negative metastatic breast cancer.

known side effects mediated through drugs targeting this protein:

\*\*\*\*\*  
\*\*\*\*\*

Glutamate [NMDA] receptor subunit epsilon-4 - Group: Channel  
Treated with:

l-glutamic acid: approved, nutraceutical small molecule (0 associated side effects) Considered to be nature's "Brain food" by improving mental capacities; helps speed the healing of ulcers; gives a "lift" from fatigue; helps control alcoholism, schizophrenia and the craving for sugar.

meperidine: approved small molecule (50 associated side effects)  
Used to control moderate to severe pain.

orphenadrine: approved small molecule (28 associated side effects) Indicated for the treatment of Parkinson's disease.

tenocyclidine: illicit, experimental small molecule (0 associated side effects) Because of its high affinity for the phencyclidine binding site on the NMDA receptor, the 3H radiolabelled form of tenocyclidine is widely used in research into NMDA receptors.

60 known side effects mediated through drugs targeting this protein:

Abdominal discomfort Abdominal distension Affect lability  
Agitation Anaemia Anaphylactic shock Aplastic anaemia  
Asthenia Bradycardia Cardiac arrest Confusional state  
Constipation Convulsion Coordination abnormal Delirium  
Dermatitis Disorientation Dizziness Dry mouth Dyskinesia  
Dysphoria Euphoric mood Feeling abnormal Flushing  
Hallucination Headache Hyperhidrosis Hypersensitivity  
Hypotension Induration Injection site pain Loss of  
consciousness Mood swings Muscle spasms Muscle twitching  
Mydriasis Myoclonus Nausea Palpitations Paralysis  
Phlebitis Pruritus Pulmonary function test decreased Rash  
Respiratory arrest Respiratory depression Sedation Shock  
Skin disorder Somnolence Syncope Tachycardia Tension  
Tremor Urinary hesitation Urinary retention Urticaria  
Vision blurred Visual impairment Vomiting

\*\*\*\*\*  
\*\*\*\*\*

Melatonin receptor type 1B - Group: Receptor

Treated with:

ramelteon: approved small molecule (20 associated side effects)  
For the treatment of insomnia characterized by difficulty with sleep onset.

melatonin: approved, nutraceutical small molecule (0 associated side effects) Used orally for jet lag, insomnia, shift-work disorder, circadian rhythm disorders in the blind (evidence for efficacy), and benzodiazepine and nicotine withdrawal. Evidence indicates that melatonin is likely effective for treating circadian rhythm sleep disorders in blind children and adults. It has received FDA orphan drug status as an oral medication for this use. A number of studies have shown that melatonin may be effective for treating sleep-wake cycle disturbances in children and adolescents with mental retardation, autism, and other central nervous system disorders. It appears to decrease the time to fall asleep in children with developmental disabilities, such as cerebral palsy, autism, and mental retardation. It may also improve secondary insomnia associated with various sleep-wake cycle disturbances. Other possible uses for which there is some evidence for include: benzodiazepine withdrawal, cluster headache, delayed sleep phase syndrome (DSPS), primary insomnia, jet lag, nicotine withdrawal, preoperative anxiety and sedation, prostate cancer, solid tumors (when combined with IL-2 therapy in certain cancers), sunburn prevention (topical use), tardive dyskinesia, thrombocytopenia associated with cancer, chemotherapy and other disorders.

agomelatine: approved small molecule (0 associated side effects) Agomelatine is indicated for the treatment of major depressive episodes in adults.

20 known side effects mediated through drugs targeting this protein:  
 Anaphylactic shock Anaphylactoid reaction Arthralgia Asthenia  
 Diarrhoea Dizziness Dysgeusia Fatigue Headache  
 Infection Influenza Insomnia Mental disability  
 Musculoskeletal discomfort Myalgia Nausea Respiratory  
 tract infection Somnolence Thinking abnormal Upper respiratory  
 tract infection

\*\*\*\*\*  
 \*\*\*\*\*

Solute carrier organic anion transporter family member 2A1 - Group:  
 Transporter

Treated with:

pyruvic acid: approved, nutraceutical small molecule (0 associated side effects) For nutritional supplementation, also for treating dietary shortage or imbalance

furosemide: approved small molecule (112 associated side effects) For the treatment of edema associated with congestive heart failure, cirrhosis of the liver, and renal disease, including the nephrotic syndrome. Also for the treatment of hypertension alone or in combination with other antihypertensive agents.

alprostadiol: approved small molecule (0 associated side effects) For palliative, not definitive, therapy to temporarily maintain the patency of the ductus arteriosus until corrective or palliative surgery can be performed in neonates who have congenital heart defects and who depend upon the patent ductus for survival. Also for the treatment of erectile dysfunction due to neurogenic, vasculogenic, psychogenic, or mixed etiology.

dinoprostone: approved small molecule (0 associated side effects) For the termination of pregnancy during the second trimester (from the 12th through the 20th gestational week as

calculated from the first day of the last normal menstrual period), as well as for evacuation of the uterine contents in the management of missed abortion or intrauterine fetal death up to 28 weeks of gestational age as calculated from the first day of the last normal menstrual period. Also used in the management of nonmetastatic gestational trophoblastic disease (benign hydatidiform mole). Other indications include improving the cervical inducibility (cervical "ripening") in pregnant women at or near term with a medical or obstetrical need for labor induction, and the management of postpartum hemorrhage.

iloprost: approved small molecule (46 associated side effects)

Used for the treatment of pulmonary arterial hypertension.

phosphoenolpyruvate: experimental small molecule (0 associated side effects)

glyceraldehyde-3-phosphate: experimental small molecule (0 associated side effects)

glucose-6-phosphate: experimental small molecule (0 associated side effects)

lactic acid: experimental small molecule (0 associated side effects)

fructose-1,6-diphosphate: experimental small molecule (0 associated side effects)

arachidonic acid: experimental small molecule (0 associated side effects)

145 known side effects mediated through drugs targeting this protein:

Abdominal discomfort Abdominal distension Abdominal pain Acute generalised exanthematous pustulosis Agitation Agranulocytosis Alkalosis Anaemia Anaphylactic shock Anaphylactoid reaction Angiopathy Aplastic anaemia Asthenia Back pain Benign prostatic hyperplasia Bladder pain Bladder spasm Blood alkaline phosphatase increased Blood uric acid increased Body temperature increased Bronchospasm Cardiac failure Cardiac failure congestive Chest pain Confusional state Constipation Cough Deafness permanent Decreased appetite Dehydration Dermatitis bullous Dermatitis exfoliative Diabetes mellitus Diarrhoea Discomfort Disturbance in attention Dizziness Drug eruption Dysgeusia Dyspnoea Electrolyte depletion Encephalopathy Eosinophilia Epidermolysis bullosa Epistaxis Erythema Erythema multiforme Eye disorder Feeling abnormal Flatulence Flushing Gamma-glutamyltransferase increased Gastrointestinal disorder Gastrointestinal pain Gingival bleeding Glossitis Glossodynia Glucose tolerance impaired Glycosuria Gout Haemoglobin Haemolytic anaemia Haemoptysis Haemorrhage Headache Hearing impaired Hepatic encephalopathy Hepatic enzyme increased Hepatobiliary disease Hydronephrosis Hypercoagulation Hyperglycaemia Hyperhidrosis Hypersensitivity Hypertrophy Hyperuricaemia Hypoproteinaemia Hypotension Hypovolaemia Immune system disorder Influenza Injection site pain Insomnia Jaundice Jaundice cholestatic Laboratory test abnormal Lethargy Leukopenia Loss of consciousness Mental disability Metabolic alkalosis Muscle spasms Muscular weakness Nausea Nephrocalcinosis

Nephrolithiasis Nervous system disorder Obstruction  
 Oedema Oedema peripheral Orthostatic hypotension  
 Orthostatic intolerance Pain Palpitations  
 Pancreatitis acute Paraesthesia Patent ductus  
 arteriosus Pemphigoid Photosensitivity reaction Pneumonia  
 Pollakiuria Polydipsia Polyuria Pruritus Purpura Rash  
 Renal failure Shock Social avoidant behaviour Somnolence  
 Supraventricular tachycardia Syncope Tachycardia Tetany  
 Thirst Thrombocytopenia Thrombophlebitis Tinnitus Toxic  
 epidermal necrolysis Trismus Tubulointerstitial nephritis  
 Urethral disorder Urinary retention Urinary tract disorder Urine  
 output increased Urticaria Vascular purpura Vasculitis Vasculitis  
 necrotising Vasodilation procedure Vertigo Vision blurred  
 Vomiting Wheezing Xanthopsia

\*\*\*\*\*  
 \*\*\*\*\*

Glutamate receptor 1 - Group: Channel

Treated with:

l-glutamic acid: approved, nutraceutical small molecule (0  
 associated side effects) Considered to be nature's "Brain food"  
 by improving mental capacities; helps speed the healing of ulcers;  
 gives a "lift" from fatigue; helps control alcoholism, schizophrenia  
 and the craving for sugar.

enflurane: approved small molecule (15 associated side effects)  
 Used for the induction and maintenance of general anaesthesia  
 during surgery and cesarean section and also used for analgesia  
 during vaginal delivery.

isoflurane: approved small molecule (31 associated side effects)  
 For induction and maintenance of general anaesthesia.

methoxyflurane: approved small molecule (0 associated side  
 effects) For use in the induction and maintenance of general  
 anaesthesia

phenobarbital: approved small molecule (54 associated side  
 effects) For the treatment of all types of seizures except absence  
 seizures.

desflurane: approved small molecule (110 associated side  
 effects) For use as an inhalation agent for induction and/or  
 maintenance of anaesthesia for inpatient and outpatient surgery in  
 adults.

sevoflurane: approved small molecule (107 associated side  
 effects) Used for induction and maintenance of general anaesthesia  
 in adult and pediatric patients for inpatient and outpatient  
 surgery.

200 known side effects mediated through drugs targeting this  
 protein:

Abdominal pain Acidosis Acute coronary syndrome Agitation  
 Alanine aminotransferase increased Albuminuria Amblyopia  
 Ammonia increased Anaemia Anaemia megaloblastic  
 Anaphylactic shock Anaphylactoid reaction Angioedema  
 Angiopathy Anxiety Aortic dissection Apnoea Arrhythmia  
 Arrhythmia supraventricular Arthralgia Aspartate  
 aminotransferase increased Asthenia Asthma Ataxia  
 Atrial fibrillation Atrioventricular block Atrioventricular  
 block complete Atrioventricular block second degree Blindness



Blindness transient      Blood creatinine increased      Body  
 temperature decreased      Body temperature increased      Bone disorder  
 Bradycardia      Breath holding      Bronchospasm      Burning sensation  
 Cardiac arrest      Cardiac disorder      Cardiac fibrillation  
 Chills      Cholestasis      Coagulopathy      Confusional state  
 Conjunctival hyperaemia      Conjunctivitis      Constipation  
 Convulsion      Cough      Cytolytic hepatitis      Delirium      Depressed  
 level of consciousness      Dermatitis      Dermatitis exfoliative      Discomfort  
 Dizziness      Drug administration error      Dry mouth      Dysgeusia  
 Dyspnoea      Dysuria      Electrocardiogram QT prolonged  
 Electrocardiogram T wave inversion      Electrocardiogram abnormal  
 Emotional disorder      Encephalopathy      Erythema  
 Extrasystoles      Eye disorder      Eye inflammation      Eye  
 irritation      Eye pain      Eyelid oedema      Fatigue      Feeling abnormal  
 Foetor hepaticus      Gastrointestinal disorder      Gastrointestinal  
 pain      Glycosuria      Haemoglobin      Haemoptysis      Haemorrhage      Hallucination  
 Hangover      Headache      Hepatic failure      Hepatic function  
 abnormal      Hepatic necrosis      Hepatitis      Hepatobiliary disease  
 Hepatocellular injury      Hiccups      Hyperaemia  
 Hyperbilirubinaemia      Hyperglycaemia      Hyperkalaemia  
 Hyperkinesia      Hypersensitivity      Hypertension  
 Hyperthermia malignant      Hypertonia      Hyperventilation      Hypocapnia  
 Hypokalaemia      Hypokinesia      Hypophosphataemia      Hypotension  
 Hypothermia      Hypoventilation      Hypoxia      Ileus      Ill-defined  
 disorder      Increased bronchial secretion      Infarction      Injection  
 site reaction      Insomnia      Irritability      Ischaemia      Jaundice  
 Keratitis      Laryngospasm      Lethargy      Leukocytosis      Liver  
 disorder      Liver injury      Loss of consciousness      Malaise  
 Malignant hypertension      Mediastinal disorder      Metabolic  
 acidosis      Migraine      Muscle rigidity      Musculoskeletal discomfort  
 Myalgia      Mycobacterium avium complex infection  
 Mycobacterium test      Myocardial infarction      Myocardial  
 ischaemia      Nausea      Necrosis      Nephritis      Nervous system  
 disorder      Nervousness      Nightmare      Nodal arrhythmia      Obstruction  
 Obstructive airways disorder      Ocular hyperaemia      Oedema  
 Oliguria      Osteomalacia      Pain      Palpitations  
 Pancreatitis acute      Pharyngitis      Phobia      Pruritus  
 Pulmonary function test decreased      Rash      Renal failure  
 Respiratory arrest      Respiratory depression      Respiratory  
 distress      Respiratory failure      Rhabdomyolysis      Salivary  
 hypersecretion      Shock      Skin burning sensation      Skin disorder  
 Somnolence      Sputum increased      Stridor      Supraventricular  
 extrasystoles      Swelling      Syncope      Tachyarrhythmia      Tachycardia  
 Tension      Thrombocytopenia      Torsade de pointes      Toxic  
 epidermal necrolysis      Tubulointerstitial nephritis      Ulcerative  
 keratitis      Urethral disorder      Urinary retention      Urinary tract disorder  
 Urine abnormality      Urine analysis abnormal      Urticaria  
 Vasodilation procedure      Ventricular extrasystoles      Ventricular  
 failure      Ventricular fibrillation      Ventricular hypokinesia  
 Ventricular tachycardia      Vertigo      Visual acuity reduced  
 Vomiting      Wheezing

\*\*\*\*\*  
 \*\*\*\*\*

Sodium- and chloride-dependent glycine transporter 2 - Group:  
 Transporter

Treated with:

glycine: approved, nutraceutical small molecule (38 associated side effects) Supplemental glycine may have antispastic activity. Very early findings suggest it may also have antipsychotic activity as well as antioxidant and anti-inflammatory activities.

38 known side effects mediated through drugs targeting this protein:

Acidosis Agitation Angina pectoris Back pain Blindness  
Blindness transient Chills Coma Convulsion Dehydration  
Diarrhoea Dizziness Dry mouth Electrolyte imbalance  
Encephalopathy Fluid overload Hyperammonaemia  
Hyperkinesia Hypersensitivity Hyponatraemia Hypotension  
Lung disorder Nausea Oedema Pain Polyuria  
Pulmonary congestion Respiratory tract congestion Rhinitis  
Salivary hypersecretion Tachycardia Thirst  
Thrombophlebitis Urinary retention Urticaria Vertigo  
Visual impairment Vomiting

\*\*\*\*\*  
\*\*\*\*\*

Voltage-dependent L-type calcium channel subunit alpha-1C - Group:  
Channel

Treated with:

isradipine: approved small molecule (0 associated side effects)

For the management of mild to moderate essential hypertension. It may be used alone or concurrently with thiazide-type diuretics.

ibutilide: approved small molecule (53 associated side effects)

Indicated for the rapid conversion of atrial fibrillation or atrial flutter of recent onset to sinus rhythm.

amlodipine: approved small molecule (136 associated side effects) For the treatment of hypertension and chronic stable angina.

nimodipine: approved small molecule (47 associated side effects)

For use as an adjunct to improve neurologic outcome following subarachnoid hemorrhage (SAH) from ruptured intracranial berry aneurysms by reducing the incidence and severity of ischemic deficits.

nisoldipine: approved small molecule (161 associated side effects) For the treatment of hypertension. It may be used alone or in combination with other antihypertensive agents.

cinnarizine: approved small molecule (0 associated side effects) For the treatment of vertigo/meniere's disease, nausea and vomiting, motion sickness and also useful for vestibular symptoms of other origins.

nicardipine: approved small molecule (107 associated side effects) Used for the management of patients with chronic stable angina and for the treatment of hypertension.

magnesium sulfate: approved small molecule (0 associated side effects) Used for immediate control of life-threatening convulsions in the treatment of severe toxemias (pre-eclampsia and eclampsia) of pregnancy and in the treatment of acute nephritis in children. Also indicated for replacement therapy in magnesium deficiency, especially in acute hypomagnesemia accompanied by signs of tetany similar to those of hypocalcemia. Also used in uterine tetany as a myometrial relaxant.

verapamil: approved small molecule (113 associated side effects) For the treatment of hypertension, angina, and cluster headache prophylaxis.

felodipine: approved small molecule (96 associated side effects) For the treatment of mild to moderate essential hypertension.

nitrendipine: approved small molecule (0 associated side effects) For the treatment of mild to moderate hypertension

nifedipine: approved small molecule (217 associated side effects) For the management of vasospastic angina, chronic stable angina, hypertension, and Raynaud's phenomenon. May be used as a first line agent for left ventricular hypertrophy and isolated systolic hypertension (long-acting agents).

calcium: experimental small molecule (31 associated side effects) Calcium plays a vital role in the anatomy, physiology and biochemistry of organisms and of the cell, particularly in signal transduction pathways. It is vital in cell signaling, muscular contractions, bone health, and signalling cascades.

mibefradil: withdrawn small molecule (0 associated side effects) For the treatment of angina and high blood pressure.

nilvadipine: approved small molecule (0 associated side effects) For the management of vasospastic angina, chronic stable angina and hypertension.

drotaverine: approved small molecule (0 associated side effects) Used in the treatment of functional bowel disorders and alleviating pain in renal colic.

390 known side effects mediated through drugs targeting this protein:

Abdominal discomfort Abdominal pain Abnormal dreams Abscess  
 Accommodation disorder Acidosis Acne Acute coronary  
 syndrome Acute generalised exanthematous pustulosis Affect  
 lability Agitation Alanine aminotransferase increased Alopecia  
 Amblyopia Amnesia Anaemia Anaphylactic shock  
 Angina pectoris Angioedema Angiopathy Anxiety Anxiety  
 disorder Apathy Arrhythmia Arteriosclerosis Arthralgia  
 Arthritis Arthropathy Asthenia Asthma Ataxia  
 Atrial fibrillation Atrioventricular block complete  
 Atrioventricular block first degree Atrioventricular block  
 second degree Atrioventricular dissociation Back pain  
 Balance disorder Bezoar Blepharitis Blindness Blindness  
 transient Blister Blood alkaline phosphatase increased Blood  
 creatine phosphokinase increased Blood creatinine increased Blood  
 lactate dehydrogenase increased Blood pressure increased Blood  
 prolactin increased Blood urea increased Blood uric acid Body  
 temperature increased Bradycardia Breast engorgement Breast pain  
 Bronchitis Bronchospasm Bundle branch block Calcinosis  
 Cardiac arrest Cardiac disorder Cardiac failure Cardiac  
 failure congestive Cardiac fibrillation Cardiac murmur  
 Cardiogenic shock Cardiomyopathy Cellulitis Cerebral  
 ischaemia Cerebrovascular accident Chest discomfort Chest pain  
 Chills Cholestasis Chronic obstructive pulmonary disease  
 Cold sweat Colitis Coma Confusional state Conjunctivitis  
 Constipation Convulsion Coombs direct test positive Cough  
 Crocodile tears syndrome Decreased appetite Deep vein  
 thrombosis Delirium Depersonalisation Depressed level of

consciousness Depressive symptom Dermatitis Dermatitis  
bullous Dermatitis exfoliative Diabetes mellitus Diarrhoea  
Diplopia Discomfort Disease progression Disseminated  
intravascular coagulation Dissociation Disturbance in  
attention Disturbance in sexual arousal Dizziness Dizziness  
postural Dry mouth Dry skin Dysgeusia Dyspepsia Dysphagia  
Dyspnoea Dysuria Ear disorder Ear infection Ear  
pain Ecchymosis Effusion Electrocardiogram ST segment  
Electrocardiogram ST segment depression Electrocardiogram T  
wave inversion Electrocardiogram abnormal Eosinophilia  
Epistaxis Erectile dysfunction Eructation Erythema  
Erythema multiforme Erythema nodosum Erythromelalgia  
Extrapyramidal disorder Extrasystoles Eye disorder  
Eye haemorrhage Eye pain Eye pruritus Face oedema  
Fasting Fatigue Feeling abnormal Feeling cold  
Feeling hot Feeling jittery Flat affect Flatulence Fluid  
retention Flushing Fungal skin infection Galactorrhoea  
Gamma-glutamyltransferase increased Gastritis  
Gastrointestinal disorder Gastrointestinal haemorrhage  
Gastrointestinal obstruction Gastrointestinal pain  
Gastrointestinal tract irritation Gastroesophageal reflux  
disease Gingival bleeding Gingival disorder Gingival hyperplasia  
Glaucoma Glomerulonephritis membranous Glossitis Gout  
Gynaecomastia Haematoma Haematuria Haemoglobin decreased  
Haemolysis Haemolytic anaemia Haemorrhage Haemorrhage  
intracranial Headache Hepatic enzyme increased Hepatic  
function abnormal Hepatitis Hepatitis cholestatic Hepatomegaly  
Herpes simplex Herpes virus infection Herpes zoster Hot  
flush Hyperaemia Hypercalcaemia Hyperglycaemia Hyperhidrosis  
Hyperkeratosis Hyperkinesia Hyperplasia  
Hyperprolactinaemia Hypersensitivity Hypertension  
Hypertonia Hypertrophic cardiomyopathy Hypertrophy  
Hypoaesthesia Hypokalaemia Hyponatraemia  
Hypophosphataemia Hypotension Hypoxia Ileus paralytic Ill-  
defined disorder Incontinence Increased appetite Infarction  
Infection Inflammation Influenza Injection site pain  
Injection site reaction Insomnia Intermittent  
claudication Irritability Ischaemia Jaundice Joint  
stiffness Joint swelling Keratitis Laboratory test abnormal  
Lacrimation increased Laryngitis Laryngospasm Lethargy  
Leukocytoclastic vasculitis Leukocytosis Leukopenia  
Libido decreased Liver function test abnormal Loss of  
consciousness Lung disorder Lymphadenopathy Macule  
Malaise Melaena Menopausal symptoms Menstrual  
disorder Mental disability Metabolic acidosis Micturition  
disorder Micturition urgency Migraine Mood swings Mouth  
ulceration Muscle fatigue Muscle spasms Muscle twitching  
Muscular weakness Musculoskeletal discomfort Musculoskeletal  
stiffness Myalgia Myocardial infarction Myocardial ischaemia  
Myositis Nasal congestion Nasopharyngitis Nausea Neck  
pain Necrosis Nephrolithiasis Nervousness Neuropathy peripheral  
Nightmare Nocturia Nodal arrhythmia Nystagmus Obstruction  
Obstructive airways disorder Oedema Oedema peripheral  
Oesophagitis Oligomenorrhoea Oliguria Oropharyngeal  
discomfort Oropharyngeal pain Orthostatic hypotension

Osteoarthritis Otitis media Pain Pain in extremity  
 Palpitations Pancreatitis Paraesthesia Paralysis  
 Paranoia Parosmia Pelvic pain Pericardial haemorrhage  
 Pericarditis Periorbital oedema Peripheral ischaemia  
 Peripheral vascular disorder Petechiae Pharyngitis Phlebitis  
 Photosensitivity reaction Platelet count decreased  
 Platelet disorder Pleural disorder Pleural effusion Poisoning  
 Pollakiuria Polyuria Pruritus Psychotic disorder  
 Pulmonary congestion Pulmonary oedema Purpura  
 Quadripareisis Rales Rash Rash erythematous Rash maculo-  
 papular Rash pustular Regurgitation Renal failure Renal  
 failure chronic Renal impairment Respiratory disorder Respiratory  
 failure Respiratory tract congestion Respiratory tract infection  
 Retinal detachment Rhinitis Rhinorrhoea Rhythm  
 idioventricular Salivary gland enlargement Sense of oppression  
 Sensory loss Sexual dysfunction Shock Sinus arrest  
 Sinus arrhythmia Sinus bradycardia Sinus tachycardia Sinusitis  
 Skin discolouration Skin ulcer Sleep disorder Sneezing  
 Somnolence Sticky skin Stomatitis Stridor Stupor  
 Supraventricular extrasystoles Supraventricular tachycardia  
 Syncope Tachyarrhythmia Tachycardia Tenderness  
 Tenosynovitis Tension Thinking abnormal Thirst  
 Thrombocytopenia Thrombophlebitis Thrombosis Thyroiditis  
 Tinnitus Toxic epidermal necrolysis Tremor Ulcer Upper  
 respiratory tract infection Urinary incontinence Urinary tract  
 infection Urine output increased Urogenital disorder Urticaria  
 Vaginal haemorrhage Vaginal infection Vaginal inflammation  
 Vascular purpura Vasculitis Vasodilation procedure Vasospasm  
 Venous insufficiency Venous thrombosis Ventricular arrhythmia  
 Ventricular extrasystoles Ventricular tachycardia  
 Vertigo Vision blurred Visual acuity reduced Visual  
 impairment Vitreous floaters Vomiting Weight decreased Weight  
 increased Wheezing Xerophthalmia

\*\*\*\*\*  
 \*\*\*\*\*

Outer membrane protein X precursor - Group: Other

Treated with:

(hydroxyethyloxy)tri(ethyloxy)octane: experimental small  
 molecule (0 associated side effects)

known side effects mediated through drugs targeting this protein:

\*\*\*\*\*  
 \*\*\*\*\*

Thiamine transporter 2 - Group: Transporter

Treated with:

l-cysteine: approved, nutraceutical small molecule (0 associated  
 side effects) For the prevention of liver damage and kidney  
 damage associated with overdoses of acetaminophen

known side effects mediated through drugs targeting this protein:

\*\*\*\*\*  
 \*\*\*\*\*

Canalicular multispecific organic anion transporter 1 - Group:  
Transporter

Treated with:

vasopressin: approved biotech (0 associated side effects)

For the treatment of enuresis, polyuria, diabetes insipidus, polydipsia and oesophageal varices with bleeding

cyclosporine: approved biotech (0 associated side effects)

For treatment of transplant rejection, rheumatoid arthritis, severe psoriasis

tetrahydrofolic acid: approved, nutraceutical small molecule (0 associated side effects) For nutritional supplementation, also for treating dietary shortage or imbalance.

glutathione: approved, nutraceutical small molecule (0 associated side effects) For nutritional supplementation, also for treating dietary shortage or imbalance

adenosine triphosphate: approved, nutraceutical small molecule (0 associated side effects) For nutritional supplementation, also for treating dietary shortage or imbalance

pravastatin: approved small molecule (147 associated side effects) For the treatment of hypercholesterolemia and to reduce the risk of cardiovascular disease.

reserpine: approved small molecule (44 associated side effects)

For the treatment of hypertension

indinavir: approved small molecule (89 associated side effects)

Indinavir is an antiretroviral drug for the treatment of HIV infection.

phenytoin: approved small molecule (247 associated side effects) For the control of generalized tonic-clonic (grand mal) and complex partial (psychomotor, temporal lobe) seizures and prevention and treatment of seizures occurring during or following neurosurgery.

clotrimazole: approved small molecule (28 associated side effects) For the local treatment of oropharyngeal candidiasis and vaginal yeast infections, also used in fungal infections of the skin such as ringworm, athlete's foot, and jock itch.

olmesartan: approved small molecule (0 associated side effects)

For the treatment of hypertension.

conjugated estrogens: approved small molecule (219 associated side effects) For the treatment of moderate to severe vasomotor symptoms associated with the menopause, atrophic vaginitis, osteoporosis, hypoestrogenism due to hypogonadism, castration, primary ovarian failure, breast cancer (for palliation only), and Advanced androgen-dependent carcinoma of the prostate (for palliation only)

indomethacin: approved small molecule (164 associated side effects) For moderate to severe rheumatoid arthritis including acute flares of chronic disease, ankylosing spondylitis, osteoarthritis, acute painful shoulder (bursitis and/or tendinitis) and acute gouty arthritis.

aminohippurate: approved small molecule (0 associated side effects) Used to measure effective renal plasma flow (ERPF) and to determine the functional capacity of the tubular excretory mechanism.

grepafloxacin: approved, withdrawn small molecule (0 associated side effects) For treatment of adults with mild to

moderate infections caused by susceptible strains of <i>Haemophilus influenzae</i>, <i>Streptococcus pneumoniae</i>, or <i>Moraxella catarrhalis</i>. sorafenib: approved small molecule (130 associated side effects) For the treatment of patients with advanced renal cell carcinoma.

spironolactone: approved small molecule (34 associated side effects) Used primarily to treat low-renin hypertension, hypokalemia, and Conn's syndrome.

streptozocin: approved small molecule (0 associated side effects) For the treatment of malignant neoplasms of pancreas (metastatic islet cell carcinoma).

cerivastatin: withdrawn small molecule (118 associated side effects) Used as an adjunct to diet for the reduction of elevated total and LDL cholesterol levels in patients with primary hypercholesterolemia and mixed dyslipidemia (Fredrickson Types IIa and IIb) when the response to dietary restriction of saturated fat and cholesterol and other non-pharmacological measures alone has been inadequate.

ritonavir: approved small molecule (297 associated side effects) Indicated in combination with other antiretroviral agents for the treatment of HIV-infection.

cisplatin: approved small molecule (111 associated side effects) For the treatment of metastatic testicular tumors, metastatic ovarian tumors and advanced bladder cancer.

vincristine: approved small molecule (118 associated side effects) For treatment of acute leukaemia, malignant lymphoma, Hodgkin's disease, acute erythraemia, acute panmyelosis

methotrexate: approved small molecule (209 associated side effects) For the treatment of gestational choriocarcinoma, chorioadenoma destruens and hydatidiform mole. Also for the treatment of severe psoriasis and severe, active, classical or definite rheumatoid arthritis.

vinblastine: approved small molecule (0 associated side effects) For treatment of breast cancer, testicular cancer, lymphomas, neuroblastoma, Hodgkin's and non-Hodgkin's lymphomas, mycosis fungoides, histiocytosis, and Kaposi's sarcoma.

ivermectin: approved small molecule (47 associated side effects) For the treatment of intestinal (i.e., nondisseminated) strongyloidiasis due to the nematode parasite <i>Strongyloides stercoralis</i>. Also for the treatment of onchocerciasis (river blindness) due to the nematode parasite <i>Onchocerca volvulus</i>. Can be used to treat scabies caused by <i>Sarcoptes scabiei</i>.

leucovorin: approved small molecule (34 associated side effects) For the treatment of osteosarcoma (after high dose methotrexate therapy). Used to diminish the toxicity and counteract the effects of impaired methotrexate elimination and of inadvertent overdoses of folic acid antagonists, and to treat megaloblastic anemias due to folic acid deficiency. Also used in combination with 5-fluorouracil to prolong survival in the palliative treatment of patients with advanced colorectal cancer.

verapamil: approved small molecule (113 associated side effects) For the treatment of hypertension, angina, and cluster headache prophylaxis.

daunorubicin: approved small molecule (55 associated side effects) For remission induction in acute nonlymphocytic leukemia (myelogenous, monocytic, erythroid) of adults and for remission induction in acute lymphocytic leukemia of children and adults.

furosemide: approved small molecule (112 associated side effects) For the treatment of edema associated with congestive heart failure, cirrhosis of the liver, and renal disease, including the nephrotic syndrome. Also for the treatment of hypertension alone or in combination with other antihypertensive agents.

etoposide: approved small molecule (109 associated side effects) For use in combination with other chemotherapeutic agents in the treatment of refractory testicular tumors and as first line treatment in patients with small cell lung cancer. Also used to treat other malignancies such as lymphoma, non-lymphocytic leukemia, and glioblastoma multiforme.

sulfasalazine: approved small molecule (114 associated side effects) For the treatment of Crohn's disease and rheumatoid arthritis as a second-line agent.

eprosartan: approved small molecule (146 associated side effects) For the management of hypertension alone or in combination with other classes of antihypertensive agents. Also used as a first-line agent in the treatment of diabetic nephropathy, as well as a second-line agent in the treatment of congestive heart failure (only in those intolerant of ACE inhibitors).

quinidine: approved small molecule (146 associated side effects) For the treatment of ventricular pre-excitation and cardiac dysrhythmias

norgestimate: approved small molecule (0 associated side effects) For the prevention of pregnancy

telmisartan: approved small molecule (174 associated side effects) Used alone or in combination with other classes of antihypertensives for the treatment of hypertension. Also used in the treatment of diabetic nephropathy in hypertensive patients with type 2 diabetes mellitus, as well as the treatment of congestive heart failure (only in patients who cannot tolerate ACE inhibitors).

ezetimibe: approved small molecule (52 associated side effects) For use as adjunctive therapy to diet for the reduction of elevated total-C, LDL-C, and Apo B in patients with primary (heterozygous familial and non-familial) hypercholesterolemia.

ethinyl estradiol: approved small molecule (0 associated side effects) For treatment of moderate to severe vasomotor symptoms associated with the menopause, female hypogonadism, prostatic carcinoma-palliative therapy of advanced disease, breast cancer, as an oral contraceptive, and as emergency contraceptive.

lomefloxacin: approved small molecule (204 associated side effects) For the treatment of bacterial infections of the respiratory tract (chronic bronchitis) and urinary tract, and as a pre-operative prophylactic to prevent urinary tract infection caused by: <i>S.pneumoniae</i>;, <i>H.influenzae</i>;, <i>S.aureus</i>;, <i>P.aeruginosa</i>;, <i>E. cloacae</i>;, <i>P. mirabilis</i>;, <i>C. civersus</i>;, <i>S. asprphyticus</i>;, <i>E.coli</i>;, and <i>K.pneumoniae</i>.



glyburide: approved small molecule (52 associated side effects)

Indicated as an adjunct to diet to lower the blood glucose in patients with NIDDM whose hyperglycemia cannot be satisfactorily controlled by diet alone.

probenecid: approved small molecule (27 associated side effects)

For the reduction of serum uric acid concentrations in chronic gouty arthritis and tophaceous gout in patients with frequent disabling gout attacks. Has also been effectively used to promote uric acid excretion in hyperuricemia secondary to the administration of thiazide and related diuretics.

rifampin: approved small molecule (0 associated side effects)

For the treatment of Tuberculosis and Tuberculosis-related mycobacterial infections.

nifedipine: approved small molecule (217 associated side effects) For the management of vasospastic angina, chronic stable angina, hypertension, and Raynaud's phenomenon. May be used as a first line agent for left ventricular hypertrophy and isolated systolic hypertension (long-acting agents).

sulfipyrazone: approved small molecule (0 associated side effects) For the treatment of gout and gouty arthritis.

ofloxacin: approved small molecule (407 associated side effects) For the treatment of infections (respiratory tract, kidney, skin, soft tissue, UTI), urethral and cervical gonorrhoea.

arsenic trioxide: approved small molecule (172 associated side effects) For induction of remission and consolidation in patients with acute promyelocytic leukemia (APL), and whose APL is characterized by the presence of the t(15;17) translocation or PML/RAR-alpha gene expression

phenobarbital: approved small molecule (54 associated side effects) For the treatment of all types of seizures except absence seizures.

levetiracetam: approved small molecule (157 associated side effects) Used as adjunctive therapy in the treatment of partial onset seizures in adults and children 4 years of age and older with epilepsy.

sparfloxacin: approved small molecule (0 associated side effects) For the treatment of adults with the following infections caused by susceptible strains microorganisms: community-acquired pneumonia (caused by *Chlamydia pneumoniae*, *Haemophilus influenzae*, *Haemophilus parainfluenzae*, *Moraxella catarrhalis*, *Mycoplasma pneumoniae*, or *Streptococcus pneumoniae*) and acute bacterial exacerbations of chronic bronchitis (caused by *Chlamydia pneumoniae*, *Enterobacter cloacae*, *Haemophilus influenzae*, *Haemophilus parainfluenzae*, *Klebsiella pneumoniae*, *Moraxella catarrhalis*, *Staphylococcus aureus*, or *Streptococcus pneumoniae*).

saquinavir: approved small molecule (321 associated side effects) For the treatment of HIV-1 with advanced immunodeficiency together with antiretroviral nucleoside analogues.

dexamethasone: approved small molecule (147 associated side effects)

sunitinib: approved small molecule (198 associated side effects) For the treatment of advanced renal cell carcinoma as well as the treatment of gastrointestinal stromal tumor after disease progression on or intolerance to imatinib mesylate.

pranlukast: approved small molecule (0 associated side effects)  
Used as an adjunct to the standard therapy of inhaled steroids with inhaled long- and/or short-acting beta-agonists.

ursodeoxycholic acid: approved small molecule (210 associated side effects) The drug reduces cholesterol absorption and is used to dissolve (cholesterol) gallstones in patients who want an alternative to surgery.

hyperforin: nutraceutical small molecule (0 associated side effects)

fusidic acid: approved small molecule (0 associated side effects) For the treatment of bacterial infections.

(1,10 phenanthroline)-(tri-carbon monoxide) rhenium (i):  
experimental small molecule (0 associated side effects)

quercetin: experimental small molecule (0 associated side effects)

taurocholic acid: experimental small molecule (0 associated side effects)

5-methyltetrahydrofolate: experimental small molecule (0 associated side effects)

1164 known side effects mediated through drugs targeting this protein:

5q minus syndrome Abdominal discomfort Abdominal distension  
Abdominal pain Abdominal pain upper Abdominal tenderness  
Abnormal behaviour Abnormal dreams Abnormal faeces  
Abnormal sensation in eye Abscess Abscess sterile  
Acidosis Acne Acute abdomen Acute coronary syndrome  
Acute generalised exanthematous pustulosis Acute  
interstitial pneumonitis Acute leukaemia Acute myeloid  
leukaemia Acute respiratory distress syndrome Acute tonsillitis  
Adrenal disorder Adrenal insufficiency Affect lability  
Ageusia Aggression Agitation Agranulocytosis Akathisia  
Alanine aminotransferase increased Albuminuria Alcohol  
intolerance Alkalosis Alkalosis hypokalaemic Alopecia Altered  
state of consciousness Alveolitis Alveolitis allergic Alveolitis  
fibrosing Amblyopia Amenorrhoea Amnesia Amyloidosis Anaemia  
Anaemia megaloblastic Anal pruritus Anaphylactic shock  
Anaphylactoid reaction Angina pectoris Angioedema Angiopathy  
Anorectal discomfort Anorectal disorder Anosmia  
Antinuclear antibody positive Antisocial behaviour  
Antisocial personality disorder Anuria Anxiety  
Aortic dissection Apathy Aphasia Aphthous stomatitis  
Aplastic anaemia Apnoea Apoptosis Application site  
reaction Arachnoiditis Arrhythmia Arrhythmia supraventricular  
Arterial disorder Arterial stenosis Arterial thrombosis  
Arteritis Arthralgia Arthritis Arthropathy Ascites  
Asocial behaviour Aspartate aminotransferase increased  
Aspiration Asterixis Asthenia Asthma Ataxia  
Atelectasis Atonic urinary bladder Atopy Atrial fibrillation  
Atrial flutter Atrioventricular block Atrioventricular block  
complete Atrioventricular dissociation Atrophy Autonomic

neuropathy Azoospermia Azotaemia Back pain Bacteraemia Bacterial  
 infection Balance disorder Benign intracranial hypertension  
 Benign neoplasm Benign prostatic hyperplasia Bezoar  
 Biliary colic Bladder dysfunction Bladder pain  
 Bladder spasm Blepharitis Blindness Blindness cortical  
 Blindness transient Blister Blood albumin decreased  
 Blood albumin increased Blood alkaline phosphatase  
 increased Blood amylase increased Blood bilirubin increased  
 Blood cholesterol increased Blood creatine phosphokinase  
 increased Blood creatinine increased Blood disorder Blood  
 electrolytes abnormal Blood glucose abnormal Blood glucose  
 decreased Blood glucose increased Blood lactate dehydrogenase  
 increased Blood magnesium decreased Blood phosphorus decreased  
 Blood potassium decreased Blood potassium increased Blood  
 pressure increased Blood prolactin increased Blood sodium  
 increased Blood thyroid stimulating hormone increased Blood  
 triglycerides increased Blood urea increased Blood uric acid  
 increased Body temperature decreased Body temperature increased  
 Bone disorder Bone pain Bradycardia Brain oedema  
 Breast cancer Breast discharge Breast discomfort Breast  
 disorder Breast engorgement Breast enlargement Breast mass  
 Breast neoplasm Breast pain Breast swelling Breast tenderness  
 Breath odour Breath sounds abnormal Bronchitis  
 Bronchospasm Bundle branch block Bundle branch block  
 right Burning sensation Bursitis Cachexia Caecitis Calcinosis  
 Calculus urinary Cancer in remission Candidiasis Candiduria  
 Capillary leak syndrome Carbohydrate tolerance decreased  
 Cardiac arrest Cardiac disorder Cardiac failure Cardiac  
 failure congestive Cardiac fibrillation Cardiac flutter  
 Cardiac murmur Cardiac valve disease Cardio-respiratory  
 arrest Cardiogenic shock Cardiomegaly Cardiomyopathy  
 Cardiovascular disorder Cataract Cataract subcapsular  
 Cauda equina syndrome Cell death Cellulitis gangrenous  
 Cerebral arteritis Cerebral artery thrombosis Cerebral  
 haemorrhage Cerebral infarction Cerebral ischaemia Cerebral  
 thrombosis Cerebral venous thrombosis Cerebrovascular accident  
 Cerebrovascular disorder Cervical discharge Cervix  
 disorder Chalazion Cheilitis Chemical eye injury Chest  
 discomfort Chest pain Chills Chloasma Cholangitis Cholangitis  
 sclerosing Cholecystitis Cholelithiasis Cholestasis Chorea  
 Choreoathetosis Chorioretinitis Choroiditis Chromaturia  
 Chronic obstructive pulmonary disease Clonus  
 Coagulopathy Cognitive disorder Colitis ischaemic  
 Colitis ulcerative Colorectal cancer Coma Coma hepatic  
 Completed suicide Compression fracture Condition aggravated  
 Confusional state Congenital generalised lipodystrophy  
 Congenital skin disorder Conjunctival haemorrhage  
 Conjunctival hyperaemia Conjunctival oedema  
 Conjunctivitis Connective tissue disorder Constipation  
 Convulsion Coombs direct test positive Coordination abnormal  
 Corneal deposits Corneal erosion Coronary artery disease  
 Coronary artery thrombosis Cough Crocodile tears syndrome  
 Crohn's disease Cryptococcosis Crystal urine  
 Crystalluria Cushing's syndrome Cushingoid Cutaneous  
 vasculitis Cyanosis Cystitis Cystitis noninfective Cytolytic

hepatitis Cytomegalovirus chorioretinitis Cytomegalovirus  
 infection Deafness Deafness bilateral Deafness permanent  
 Death Decreased appetite Deep vein thrombosis Dehydration  
 Delirium Dementia Dental plaque Dependence  
 Depersonalisation Depressed level of consciousness Depressed  
 mood Depression Depressive symptom Dermatitis Dermatitis  
 acneiform Dermatitis bullous Dermatitis contact Dermatitis  
 exfoliative Dermatitis psoriasiform Dermatomyositis Diabetes  
 insipidus Diabetes mellitus Diarrhoea Diarrhoea haemorrhagic  
 Diplegia Diplopia Discomfort Disease progression  
 Disorientation Disseminated intravascular coagulation  
 Dissociation Disturbance in attention Disturbance in  
 sexual arousal Diverticulum Dizziness Drug abuse Drug  
 eruption Drug hypersensitivity Drug interaction Drug level  
 increased Drug rash with eosinophilia and systemic symptoms Drug  
 withdrawal convulsions Dry eye Dry mouth Dry skin Duodenal  
 ulcer Dysaesthesia Dysarthria Dyschezia Dysentery Dysgeusia  
 Dyskinesia Dysmenorrhoea Dyspepsia Dysphagia Dysphonia  
 Dysplasia Dyspnoea Dystonia Dysuria Ear disorder  
 Ear haemorrhage Ear infection Ear pain Ecchymosis  
 Ectropion of cervix Eczema Effusion Ejaculation  
 failure Ejection fraction Ejection fraction decreased Elderly  
 Electrocardiogram PR interval Electrocardiogram QT  
 prolonged Electrocardiogram abnormal Electrocardiogram change  
 Electrocardiogram normal Electroencephalogram abnormal  
 Electrolyte depletion Electrolyte imbalance Embolism  
 Embolism venous Emotional disorder Emotional distress  
 Emphysema Encephalitis Encephalopathy Endocarditis  
 Endocrine disorder Endometrial cancer Endometrial  
 hypertrophy Endometriosis Enteritis Enterocolitis Enuresis  
 Enzyme abnormality Eosinophilia Eosinophilic  
 myocarditis Epidermolysis bullosa Epididymitis Epilepsy  
 Epistaxis Erectile dysfunction Eructation Erythema  
 Erythema multiforme Erythema nodosum Erythromelalgia  
 Erythropenia Euphoric mood Exophthalmos Extensor  
 plantar response Extrapyrmidal disorder Extrasystoles  
 Extravasation Eye disorder Eye haemorrhage Eye  
 infection Eye inflammation Eye irritation Eye pain Eye  
 pruritus Eyelid oedema Eyelid ptosis Face oedema Facial  
 nerve disorder Facial pain Facial paresis Factor VIII deficiency  
 Faecal incontinence Faeces discoloured Fasciitis  
 Fasting Fat embolism Fat redistribution Fat tissue  
 increased Fatigue Febrile neutropenia Feeling abnormal  
 Feeling cold Feeling hot Feeling jittery Fibrocystic  
 breast disease Fibrosis Fistula Flank pain Flat affect  
 Flatulence Fluid overload Fluid retention Flushing  
 Foetor hepaticus Folliculitis Frequent bowel movements  
 Fungal infection Fungal skin infection Furuncle Gait  
 disturbance Galactorrhoea Gallbladder disorder Gamma-  
 glutamyltransferase increased Gangrene Gastric disorder  
 Gastric haemorrhage Gastric perforation Gastric ulcer  
 Gastritis Gastroenteritis Gastrointestinal disorder  
 Gastrointestinal haemorrhage Gastrointestinal necrosis  
 Gastrointestinal obstruction Gastrointestinal pain  
 Gastrointestinal toxicity Gastrointestinal tract irritation

Gastrointestinal ulcer Gastrooesophageal reflux disease  
 Generalised oedema Genital candidiasis Genital discharge  
 Gingival bleedingGingival disorderGingival hyperplasia  
 Gingival pain Gingivitis Glaucoma Glomerulonephritis  
 Glossitis Glossodynia Glucose tolerance decreased Glucose  
 tolerance impaired Glycosuria Goitre Gout Grand mal  
 convulsion Granulomatous liver disease Gravitational oedema  
 Gynaecomastia Haemangioma Haemarthrosis Haematemesis  
 Haematochezia Haematocrit decreased Haematoma Haematuria  
 Haemoglobin decreased Haemoglobinuria Haemolysis Haemolytic  
 anaemia Haemolytic uraemic syndrome Haemoptysis Haemorrhage  
 Haemorrhage intracranial Haemorrhage urinary tract  
 Haemorrhagic disorder Haemorrhoids Hair colour changes  
 Hallucination Hangover Headache Hearing impaired Heat  
 rash Hemiparesis Hemiplegia Hepatic cirrhosisHepatic encephalopathy  
 Hepatic enzyme increased Hepatic failure Hepatic function  
 abnormal Hepatic necrosis Hepatic neoplasm malignant Hepatic  
 steatosis Hepatitis acute Hepatitis chronic active Hepatitis  
 fulminant Hepatobiliary disease Hepatocellular injury  
 Hepatomegaly Hepatosplenomegaly Herpes simplex  
 Herpes virus infection Herpes zoster Hiccups Hirsutism  
 Histoplasmosis Hormone level abnormalHostility Hot flush  
 Hydronephrosis Hyperacusis Hyperaemia Hyperaesthesia  
 Hyperamylasaemia Hyperbilirubinaemia Hypercalcaemia  
 Hypercholesterolaemia Hypercoagulation Hyperglycaemia  
 Hyperhidrosis Hyperkalaemia Hyperkeratosis  
 Hyperkinesia Hyperlactacidaemia Hyperlipidaemia  
 Hypernatraemia Hyperphosphataemia Hyperplasia  
 Hyperprolactinaemia Hyperreflexia Hypersensitivity  
 Hypersomnia Hypertension Hypertensive crisis  
 Hyperthyroidism Hypertonia Hypertrichosis  
 Hypertriglyceridaemia Hypertrophic cardiomyopathy Hypertrophy  
 Hyperuricaemia Hyperventilation Hypoaesthesia  
 Hypoaesthesia facial Hypoalbuminaemia Hypocalcaemia  
 Hypochromic anaemia Hypogammaglobulinaemia Hypogeusia  
 Hypoglycaemia Hypokalaemia Hypokinesia Hypomagnesaemia  
 Hyponatraemia HypophosphataemiaHypopituitarism  
 Hypoproteinaemia Hypoprothrombinaemia Hyporeflexia  
 Hyposthenuria Hypotension Hypothermia Hypothyroidism  
 Hypotonia Hypoventilation Hypovitaminosis Hypovolaemia  
 Hypoxia IIIrd nerve paralysis Ichthyosis acquired  
 Idiopathic pulmonary fibrosis Idiopathic thrombocytopenic  
 purpura Ileitis Ileus Ileus paralytic Ill-defined disorder  
 Immune system disorder Impaired healing Inappropriate  
 antidiuretic hormone secretion Incontinence Increased  
 appetite Increased bronchial secretion Induration Infantile  
 genetic agranulocytosis Infarction Infection Infertility  
 Infestation Inflammation Inflammatory bowel disease  
 Influenza Influenza like illness Ingrowing nail Injection  
 site inflammationInjection site pain Injection site reaction  
 Inner ear disorder Insomnia Insulin resistance  
 Intermittent claudication Interstitial lung disease  
 Intestinal obstruction Intestinal perforation Intestinal ulcer  
 Intra-uterine death Intracranial pressure increased  
 Intraocular pressure increased Iridocyclitis Iritis

Irritability      Ischaemia      Jaundice      Jaundice cholestatic  
 Joint stiffness      Joint swelling      Keratitis      Keratoacanthoma  
 Keratoconjunctivitis sicca      Ketoacidosis      Ketosis  
 Laboratory test abnormal      Lacrimal disorder      Lacrimation  
 decreased      Lacrimation increased      Large intestine carcinoma  
 Laryngeal disorder      Laryngeal oedema      Laryngitis  
 Laryngospasm      Left ventricular dysfunction      Leiomyoma      Lens  
 disorder      Lenticular opacities      Lethargy      Leukaemia  
 Leukocytoclastic vasculitis      Leukocytosis      Leukoderma  
 Leukoencephalopathy      Leukopenia      Libido decreased      Lip dry  
 Lipase increased      Lipodystrophy acquired      Lipohypertrophy      Liver  
 disorder      Liver function test abnormal      Liver injury      Local  
 reaction      Loss of consciousness      Loss of libido      Lung disorder  
 Lung infection      Lung infiltration      Lung neoplasm malignant  
 Lupus miliaris disseminatus faciei      Lymphadenopathy  
 Lymphocytosis      Lymphoma      Lymphopenia      Lymphoproliferative  
 disorder      Macrocytosis      Macule      Maculopathy      Major depression  
 Malaise      Malignant melanoma      Malnutrition      Mania      Mass  
 Mediastinal disorder      Melaena      Memory impairment      Meningioma  
 benign      Meningitis      Meningitis aseptic      Menopausal symptoms  
 Menorrhagia      Menstrual disorder      Menstruation irregular  
 Mental disability      Mental disorder      Mental retardation  
 Metabolic acidosis      Metabolic alkalosis      Metastasis  
 Metastatic renal cell carcinoma      Methaemoglobinaemia  
 Metrorrhagia      Microangiopathy      Micturition disorder  
 Migraine      Molluscum contagiosum      Monocytosis      Monoplegia      Mood  
 swings      Mouth ulceration      Mucosal dryness      Mucosal inflammation  
 Mucosal ulceration      Multi-organ failure      Muscle atrophy  
 Muscle contractions involuntary      Muscle fatigue      Muscle mass  
 Muscle relaxant therapy      Muscle rigidity      Muscle spasms  
 Muscle twitching      Muscular weakness      Musculoskeletal discomfort  
 Musculoskeletal disorder      Musculoskeletal pain  
 Musculoskeletal stiffness      Myalgia      Myasthenia gravis  
 Mydriasis      Myelitis      Myelitis transverse      Myelodysplastic  
 syndrome      Myeloid leukaemia      Myeloproliferative disorder      Myocardial  
 infarction      Myocardial ischaemia      Myocardial rupture      Myocarditis  
 Myoclonus      Myoglobinuria      Myopathy      Myositis      Nail  
 disorder      Nasal congestion      Nasal discomfort      Nasopharyngitis  
 Nausea      Neck pain      Necrosis      Necrotising colitis  
 Necrotising enterocolitis neonatal      Necrotising fasciitis  
 Neoplasm      Neoplasm malignant      Nephritic syndrome  
 Nephritis      Nephrocalcinosis      Nephrolithiasis      Nephropathy toxic  
 Nephrotic syndrome      Nerve root lesion      Nervous system  
 disorder      Nervousness      Neuralgia      Neuritis      Neurological symptom  
 Neuropathy peripheral      Neurosis      Neutropenia      Neutropenic  
 colitis      Neutrophilia      Night blindness      Night sweats  
 Nightmare      Nipple pain      Nitrogen balance negative      Nocardiosis  
 Nocturia      Nodule      Nuchal rigidity      Nystagmus      Obstruction  
 Obstructive airways disorder      Ocular hyperaemia      Ocular  
 hypertension      Oedema      Oedema genital      Oedema peripheral  
 Oesophageal disorder      Oesophageal ulcer      Oesophagitis  
 Oesophagitis ulcerative      Oligohydramnios      Oligomenorrhoea  
 Oliguria      Onychomycosis      Ophthalmoplegia      Opportunistic  
 infection      Optic atrophy      Optic nerve disorder      Optic neuritis  
 Oral candidiasis      Oral pain      Orchitis noninfective      Organ

failure      Oropharyngeal discomfort      Oropharyngeal pain  
                Orthostatic hypotension      Orthostatic intolerance  
                Osteoarthritis      Osteoarthropathy      Osteomalacia  
                Osteomyelitis      Osteonecrosis      Osteoporosis      Otitis  
externa      Otitis media      Ovarian cancer      Pain      Pain in extremity  
                Pain in jaw      Pallor      Palmar-plantar erythrodysesthesia  
syndrome      Palpitations      Pancreatic disorder      Pancreatitis  
                Pancreatitis acute      Pancytopenia      Panniculitis  
                Papilloedema      Papilloma      Paraesthesia      Paraesthesia oral  
                Paralysis      Paranoia      Paraparesis      Paraplegia      Parapsoriasis  
                Paresis      Paronychia      Parosmia      Parotitis      Partial seizures  
                Patent ductus arteriosus      Pathological fracture      Pelvic pain  
                Pemphigoid      Penis disorder      Peptic ulcer      Pericardial  
effusion      Pericarditis      Perineal pain      Periodontitis  
                Periorbital oedema      Peripheral ischaemia      Peripheral  
sensory neuropathy      Peripheral vascular disorder      Peritonsillar  
abscess      Peroneal nerve palsy      Personality change      Personality  
disorder      Petechiae      Pharyngitis      Phlebitis      Phobia      Photophobia  
                Photosensitivity reaction      Pigmentation disorder      Pityriasis  
lichenoides et varioliformis acuta      Plantar erythema      Plantar fasciitis  
                Plasmodium falciparum infection      Platelet aggregation  
decreased      Platelet count decreased      Platelet disorder      Pleural  
disorder      Pleural effusion      Pleurisy      Pneumocystis jirovecii  
pneumonia      Pneumonia aspiration      Pneumonia cytomegaloviral  
                Pneumothorax      Poisoning      Poliomyelitis      Pollakiuria  
                Polyarteritis nodosa      Polyarthritides      Polydipsia      Polymyalgia  
rheumatica      Polyneuropathy      Polyp      Polyuria      Porphyria      Porphyria  
non-acute      Portal hypertension      Posterior reversible  
encephalopathy syndrome      Postmenopausal haemorrhage      Precocious  
puberty      Premature baby      Primary hypothyroidism      Proctalgia  
                Proctitis      Productive cough      Progressive multifocal  
leukoencephalopathy      Prostatic disorder      Prostatomegaly  
                Protein urine present      Proteinuria      Prothrombin level decreased  
                Prothrombin level increased      Prurigo      Pruritus      Pruritus  
genital      Pseudolymphoma      Pseudomembranous colitis      Psoriasis  
                Psychiatric symptom      Psychotic disorder      Puberty  
                Pulmonary congestion      Pulmonary embolism      Pulmonary  
fibrosis      Pulmonary function test decreased      Pulmonary haemorrhage  
                Pulmonary hypertension      Pulmonary oedema      Pulmonary toxicity  
                Purpura      Pyelonephritis      Pyuria      Quadriparesis  
                Radiculopathy      Rales      Rash      Rash erythematous      Rash follicular  
                Rash generalised      Rash macular      Rash maculo-papular      Rash  
morbilliform      Rash papular      Rash pustular      Raynaud's  
phenomenon      Recall phenomenon      Rectal haemorrhage      Rectal tenesmus  
                Reflux oesophagitis      Regressive behaviour      Regurgitation  
                Renal artery stenosis      Renal colic      Renal failure      Renal  
failure acute      Renal failure chronic      Renal impairment      Renal pain  
                Renal tubular disorder      Respiratory arrest      Respiratory  
depression      Respiratory disorder      Respiratory distress      Respiratory  
failure      Respiratory tract congestion      Respiratory tract infection  
                Retinal disorder      Retinal pigmentation      Retinal vein  
thrombosis      Retinitis pigmentosa      Retinogram abnormal      Retinoic  
acid syndrome      Retinopathy of prematurity      Rhabdomyolysis  
                Rhinitis      Rhinitis allergic      Rhinorrhoea      Rhonchi      Salivary  
gland disorder      Salivary gland enlargement      Salivary

hypersecretion    Sarcoma    Sciatica    Scleral disorder    Scleral  
hyperaemia    Scotoma    Seborrhoeic dermatitis    Secondary  
adrenocortical insufficiency    Sedation    Sensation of foreign body  
Sensitisation    Sensory loss    Sepsis    Serum sickness  
Sexual dysfunction    Shock    Sialoadenitis    Sicca syndrome  
Sinus arrest    Sinus bradycardia    Sinusitis    Skin atrophy  
Skin burning sensation    Skin cancer    Skin discolouration    Skin  
disorder    Skin exfoliation    Skin hyperpigmentation    Skin hypertrophy  
Skin irritation    Skin mass    Skin necrosis    Skin papilloma  
Skin striae    Skin test positive    Skin ulcer    Sleep disorder  
Small for dates baby    Smear cervix abnormal    Social avoidant  
behaviour    Soft tissue necrosis    Somnolence    Speech disorder  
Spinal cord disorder    Splenomegaly    Splinter haemorrhages  
Sputum increased    Squamous cell carcinoma    Staphylococcal  
infection    Status epilepticus    Stickler's syndrome    Stomatitis  
Strabismus    Strangury    Stridor    Stupor    Subcutaneous  
nodule    Subdural haematoma    Sudden death    Sudden visual  
loss    Suicidal behaviour    Suicidal ideation    Suicide attempt  
Supraventricular tachycardia    Swelling    Swelling face  
Swollen tongue    Syncope    Synovitis    Systemic lupus  
erythematosus    Tachycardia    Tachypnoea    Telangiectasia    Tenderness  
Tendon disorder    Tendon pain    Tendonitis    Tenosynovitis  
Tension    Testicular pain    Tetany    Thinking abnormal  
Thirst    Thought blocking    Throat irritation    Throat tightness  
Thrombocytopenia    Thrombocytopenic purpura    Thrombocytosis  
Thrombophlebitis    Thrombophlebitis superficial    Thrombosis  
Thrombotic microangiopathy    Thrombotic thrombocytopenic  
purpura    Thyroid disorder    Thyroiditis    Tinnitus    Tongue  
discolouration    Tongue disorder    Tongue oedema    Tongue ulceration  
Tooth abscess    Tooth disorder    Tooth impacted    Toothache  
Torsade de pointes    Toxic epidermal necrolysis    Toxic skin  
eruption    Toxicity to various agents    Tracheobronchitis  
Transaminases increased    Transient ischaemic attack  
Tremor    Tubulointerstitial nephritis    Tumour lysis syndrome  
Tumour necrosis    Tumour pain    Ulcer    Ulcer haemorrhage    Upper  
respiratory tract infection    Upper-airway cough syndrome    Ureteric  
obstruction    Urethral disorder    Urethral pain    Urethritis    Urinary  
incontinence    Urinary retention    Urinary tract disorder    Urinary  
tract infection    Urine abnormality    Urine analysis abnormal    Urine  
colour abnormal    Urine output increased    Urogenital disorder  
Urticaria    Uterine cancer    Uterine cervical erosion  
Uterine leiomyoma    Uterine spasm    Uterovaginal prolapse  
Uveitis    VIIIth nerve paralysis    Vaginal discharge    Vaginal  
haemorrhage    Vaginal infection    Vaginal inflammation    Varices  
oesophageal    Varicose vein    Vascular purpura    Vascular resistance  
systemic    Vasculitis    Vasculitis necrotising    Vasoconstriction  
Vasodilatation    Vasodilation procedure    Vasospasm    Venous  
thrombosis    Ventricular arrhythmia    Ventricular dysfunction  
Ventricular extrasystoles    Ventricular fibrillation  
Ventricular tachycardia    Vertigo    Vestibular disorder  
Viral infection    Vision blurred    Visual acuity reduced  
Visual impairment    Vitreous detachment    Vitreous disorder  
Vitreous floaters    Vocal cord paralysis    Vocal cord paresis  
Vomiting    Vulvovaginal burning sensation    Vulvovaginal  
candidiasis    Vulvovaginal mycotic infection    Vulvovaginal pruritus



Weight decreased Weight increased Wheezing White blood cell  
count decreased White blood cell disorder White blood cells  
urine positive Withdrawal bleed Withdrawal syndrome Wound  
haemorrhage X-linked lymphoproliferative syndrome Xanthomatosis  
Xanthopsia Xeroderma Xerophthalmia Yellow skin

\*\*\*\*\*  
\*\*\*\*\*

Tyrosine-protein phosphatase non-receptor type 4 - Group: Enzyme

Treated with:

alendronate: approved small molecule (52 associated side  
effects) For the treatment and prevention of osteoporosis in women  
and Paget's disease of bone in both men and women.

52 known side effects mediated through drugs targeting this protein:

Alopecia Anaemia Anastomotic ulcerAngioedema Asthenia Body  
temperature increased Calcinosis Discomfort Duodenal ulcer  
Endometrial sarcoma Episcleritis Erosive oesophagitis  
Feeling abnormal Gastric ulcer Gastrointestinal disorder  
Gastroesophageal reflux disease Haemoglobin Haemorrhage  
Hypersensitivity Hypocalcaemia Ill-defined disorder  
Impaired healing Infection Influenza Joint swelling  
Leukaemia Lymphopenia Malaise Melaena Musculoskeletal  
discomfort Musculoskeletal pain Myalgia Neoplasm malignant  
Oedema Oedema peripheral Oesophageal stenosis  
Oesophagitis Oral disorder Osteogenesis imperfecta  
Osteomalacia Osteomyelitis Osteonecrosis of jaw  
Peptic ulcer Photosensitivity reaction Pruritus  
Scleritis Swelling Toxic epidermal necrolysis  
Transaminases increased Urticaria Uveitis Vertigo

\*\*\*\*\*  
\*\*\*\*\*

Vascular endothelial growth factor receptor 2 - Group: Enzyme

Treated with:

sorafenib: approved small molecule (130 associated side  
effects) For the treatment of patients with advanced renal cell  
carcinoma.

sunitinib: approved small molecule (198 associated side  
effects) For the treatment of advanced renal cell carcinoma as  
well as the treatment of gastrointestinal stromal tumor after  
disease progression on or intolerance to imatinib mesylate.

n-(4-{4-amino-6-[4-(methoxy)phenyl]furo[2,3-d]pyrimidin-5-  
yl}phenyl)-n'-[2-fluoro-5-(trifluoromethyl)phenyl]urea:

experimental small molecule (0 associated side effects)

4-[[2-[[4-chloro-3-(trifluoromethyl)phenyl]amino]-3h-benzimidazol-5-  
yl]oxy]-n-methyl-pyridine-2-carboxamide: experimental small  
molecule (0 associated side effects)

n-(4-phenoxyphenyl)-2-[(pyridin-4-ylmethyl)amino]nicotinamide:  
experimental small molecule (0 associated side effects)

n-cyclopropyl-6-[(6,7-dimethoxyquinolin-4-yl)oxy]naphthalene-1-  
carboxamide: experimental small molecule (0 associated  
side effects)

6-chloro-n-pyrimidin-5-yl-3-[[3-(trifluoromethyl)phenyl]amino]-1,2-  
benzisoxazole-7-carboxamide: experimental small molecule (0  
associated side effects)

CN(C1CC1)C2=CC=C(C=C2)C(=O)N3C=CC=CC3 n-(cyclopropylmethyl)-4-(methoxy)-3-({5-[3-(3-pyridinyl)phenyl]-1,3-oxazol-2-yl}amino)benzenesulfonamide: experimental small molecule (0 associated side effects)  
CN(C1CC1)C2=CC=C(C=C2)C(=O)N3C=CC=CC3 n-[5-(ethylsulfonyl)-2-methoxyphenyl]-5-[3-(2-pyridinyl)phenyl]-1,3-oxazol-2-amine: experimental small molecule (0 associated side effects)  
CN(C1CC1)C2=CC=C(C=C2)C(=O)N3C=CC=CC3 3-(2-aminoquinazolin-6-yl)-1-(3,3-dimethylindolin-6-yl)-4-methylpyridin-2(1h)-one: experimental small molecule (0 associated side effects)  
CN(C1CC1)C2=CC=C(C=C2)C(=O)N3C=CC=CC3 3-(2-aminoquinazolin-6-yl)-4-methyl-1-[3-(trifluoromethyl)phenyl]pyridin-2(1h)-one: experimental small molecule (0 associated side effects)  
CN(C1CC1)C2=CC=C(C=C2)C(=O)N3C=CC=CC3 n'-(6-aminopyridin-3-yl)-n-(2-cyclopentylethyl)-4-methyl-benzene-1,3-dicarboxamide: experimental small molecule (0 associated side effects)  
CN(C1CC1)C2=CC=C(C=C2)C(=O)N3C=CC=CC3 n~4~-methyl-n~4~-(3-methyl-1h-indazol-6-yl)-n~2~-(3,4,5-trimethoxyphenyl)pyrimidine-2,4-diamine: experimental small molecule (0 associated side effects)

251 known side effects mediated through drugs targeting this protein:

Abdominal discomfort Abdominal pain Abdominal pain upper Acne  
 Acute coronary syndrome Adrenal insufficiency Ageusia  
 Alanine aminotransferase increased Alopecia Anaemia  
 Angioedema Angiopathy Aortic dissection Aphthous stomatitis  
 Apoptosis Arrhythmia Arthralgia Ascites Aspartate  
 aminotransferase increased Asthenia Back pain Blindness  
 Blindness cortical Blister Blood albumin decreased  
 Blood alkaline phosphatase increased Blood amylase  
 increased Blood bilirubin increased Blood creatinine increased  
 Blood glucose decreased Blood glucose increased Blood  
 magnesium decreased Blood phosphorus decreased Blood potassium  
 decreased Blood potassium increased Blood sodium increased Blood  
 thyroid stimulating hormone increased Blood uric acid increased  
 Body temperature increased Bradycardia Breast disorder  
 Cardiac disorder Cardiac failure Cardiac failure congestive  
 Cell death Cerebral haemorrhage Cerebral infarction  
 Cerebrovascular accident Chest pain Chills Cholangitis  
 Cholecystitis Completed suicide Congenital skin disorder  
 Connective tissue disorder Constipation Convulsion Cough  
 Decreased appetite Deep vein thrombosis Dehydration  
 Depressed mood Dermatitis Dermatitis bullous Dermatitis  
 exfoliative Dermatitis psoriasiform Diarrhoea Discomfort  
 Dizziness Dry mouth Dry skin Dysgeusia Dyspepsia  
 Dysphagia Dysphonia Dyspnoea Eczema Effusion  
 Ejection fraction Ejection fraction decreased Electrocardiogram  
 PR interval Embolism Embolism venous Endocrine disorder  
 Epistaxis Erectile dysfunction Erythema Erythema  
 multiforme Eye disorder Fatigue Febrile neutropenia  
 Fistula Flank pain Flatulence Flushing Folliculitis  
 Gastric haemorrhage Gastritis Gastrointestinal disorder  
 Gastrointestinal pain Gastroesophageal reflux disease  
 Gingival pain Gingivitis Glossitis Glossodynia  
 Gynaecomastia Haematemesis Haematochezia Haematoma  
 Haemoglobin decreased Haemoptysis Haemorrhage Haemorrhoids

Hair colour changes      Headache      Hepatic failure      Hepatic  
 function abnormal      Hepatic neoplasm malignant      Hepatobiliary disease  
 Hormone level abnormal      Hypercalcaemia      Hyperglycaemia  
 Hyperkalaemia      Hypernatraemia      Hypersensitivity  
 Hypertension      Hypertensive crisis      Hyperthyroidism  
 Hyperuricaemia      Hypoalbuminaemia      Hypocalcaemia      Hypogeusia  
 Hypoglycaemia      Hypokalaemia      Hyponatraemia  
 Hypophosphataemia      Hypothyroidism      Immune system disorder  
 Infarction      Infection      Infestation      Inflammation      Influenza  
 Influenza like illness      Insomnia      Ischaemia      Jaundice  
 Keratoacanthoma      Lacrimation increased      Left ventricular  
 dysfunction      Leukoderma      Leukoencephalopathy      Leukopenia      Lipase  
 increased      Loss of consciousness      Lung neoplasm malignant  
 Lymphopenia      Malaise      Mediastinal disorder      Melaena  
 Mental disorder      Metastasis      Metastatic renal cell carcinoma  
 Metrorrhagia      Microangiopathy      Mood swings      Mouth ulceration  
 Mucosal dryness      Mucosal inflammation      Musculoskeletal  
 discomfort      Myalgia      Myocardial ischaemia      Myopathy  
 Nasopharyngitis      Nausea      Necrosis      Neoplasm malignant  
 Nephritis      Nephrotic syndrome      Nervous system disorder  
 Neuropathy peripheral      Neutropenia      Oedema      Oedema peripheral  
 Oesophageal disorder      Oesophagitis      Oral pain      Pain  
 in extremity      Palmar-plantar erythrodysesthesia syndrome  
 Pancreatic disorder      Pancreatitis      Periorbital oedema  
 Peripheral sensory neuropathy      Platelet count decreased  
 Pleural disorder      Pleural effusion      Posterior reversible  
 encephalopathy syndrome      Primary hypothyroidism      Protein urine  
 present      Proteinuria      Prurigo      Pruritus      Pulmonary embolism  
 Pulmonary haemorrhage      Rash      Rash erythematous      Rash follicular  
 Rash papular      Reflux oesophagitis      Regressive behaviour  
 Renal failure      Renal failure acute      Renal impairment  
 Respiratory tract infection      Rhabdomyolysis      Rhinorrhoea      Shock  
 Skin cancer      Skin discolouration      Skin exfoliation      Social  
 avoidant behaviour      Splinter haemorrhages      Squamous cell  
 carcinoma      Stomatitis      Syncope      Thrombocytopenia      Thrombosis  
 Thrombotic microangiopathy      Thyroid disorder      Thyroiditis  
 Tinnitus      Tongue ulceration      Transient ischaemic attack  
 Tubulointerstitial nephritis      Tumour lysis syndrome      Tumour  
 necrosis      Tumour pain      Ulcer      Upper respiratory tract infection  
 Urticaria      Varices oesophageal      Varicose vein      Venous  
 thrombosis      Ventricular dysfunction      Visual acuity reduced  
 Visual impairment      Vomiting      Weight decreased      Wound haemorrhage  
 Yellow skin

\*\*\*\*\*  
 \*\*\*\*\*

High affinity immunoglobulin epsilon receptor subunit alpha - Group:  
 Receptor

Treated with:

omalizumab: approved      biotech      (0 associated side effects)      For  
 treatment of asthma caused by allergies  
 benzylpenicilloyl polylysine:      approved      small molecule      (0  
 associated side effects)      For use as a adjunct in assessing the  
 risk of administering penicillin (benzylpenicillin or penicillin G).  
 alpha-d-mannose: experimental      small molecule      (0 associated  
 side effects)

known side effects mediated through drugs targeting this protein:

\*\*\*\*\*  
\*\*\*\*\*

Interferon-gamma receptor alpha chain - Group: Receptor

Treated with:

interferon gamma-1b: approved biotech (0 associated side effects) Interferon gamma-1b is used for the treatment of Chronic granulomatous disease and Osteopetrosis.

known side effects mediated through drugs targeting this protein:

\*\*\*\*\*  
\*\*\*\*\*

Solute carrier organic anion transporter family member 2B1 - Group: Transporter

Treated with:

pravastatin: approved small molecule (147 associated side effects) For the treatment of hypercholesterolemia and to reduce the risk of cardiovascular disease.

conjugated estrogens: approved small molecule (219 associated side effects) For the treatment of moderate to severe vasomotor symptoms associated with the menopause, atrophic vaginitis, osteoporosis, hypoestrogenism due to hypogonadism, castration, primary ovarian failure, breast cancer (for palliation only), and Advanced androgen-dependent carcinoma of the prostate (for palliation only)

digoxin: approved small molecule (56 associated side effects) For the treatment and management of congestive cardiac insufficiency, arrhythmias and heart failure.

montelukast: approved small molecule (104 associated side effects) For the treatment of asthma

niacin: approved, nutraceutical small molecule (0 associated side effects) For the treatment of type IV and V hyperlipidemia. It is indicated as adjunctive therapy.

latanoprost: approved small molecule (54 associated side effects) For the reduction of elevated intraocular pressure in patients with open-angle glaucoma or ocular hypertension.

estrone: approved small molecule (0 associated side effects) For management of perimenopausal and postmenopausal symptoms.

alprostadil: approved small molecule (0 associated side effects) For palliative, not definitive, therapy to temporarily maintain the patency of the ductus arteriosus until corrective or palliative surgery can be performed in neonates who have congenital heart defects and who depend upon the patent ductus for survival. Also for the treatment of erectile dysfunction due to neurogenic, vasculogenic, psychogenic, or mixed etiology.

estradiol: approved small molecule (315 associated side effects) For the treatment of urogenital symptoms associated with post-menopausal atrophy of the vagina (such as dryness, burning, pruritus and dyspareunia) and/or the lower urinary tract (urinary urgency and dysuria).

dinoprostone: approved small molecule (0 associated side effects) For the termination of pregnancy during the second

trimester (from the 12th through the 20th gestational week as calculated from the first day of the last normal menstrual period), as well as for evacuation of the uterine contents in the management of missed abortion or intrauterine fetal death up to 28 weeks of gestational age as calculated from the first day of the last normal menstrual period. Also used in the management of nonmetastatic gestational trophoblastic disease (benign hydatidiform mole). Other indications include improving the cervical inducibility (cervical "ripening") in pregnant women at or near term with a medical or obstetrical need for labor induction, and the management of postpartum hemorrhage.

salicylic acid: approved small molecule (33 associated side effects) Key additive in many skin-care products for the treatment of acne, psoriasis, callouses, corns, keratosis pilaris and warts.

fexofenadine: approved small molecule (65 associated side effects) For management of Seasonal allergic rhinitis

glyburide: approved small molecule (52 associated side effects) Indicated as an adjunct to diet to lower the blood glucose in patients with NIDDM whose hyperglycemia cannot be satisfactorily controlled by diet alone.

rifampin: approved small molecule (0 associated side effects) For the treatment of Tuberculosis and Tuberculosis-related mycobacterial infections.

ergoloid mesylate: approved small molecule (0 associated side effects) For use as an adjunct therapy for patients with dementia

ibuprofen: approved small molecule (252 associated side effects)

penicillin G: approved small molecule (0 associated side effects) For use in the treatment of severe infections caused by penicillin G-susceptible microorganisms when rapid and high penicillin levels are required such as in the treatment of septicemia, meningitis, pericarditis, endocarditis and severe pneumonia.

iloprost: approved small molecule (46 associated side effects) Used for the treatment of pulmonary arterial hypertension.

tolbutamide: approved small molecule (0 associated side effects) For treatment of NIDDM (non-insulin-dependent diabetes mellitus) in conjunction with diet and exercise.

phthalic acid: experimental small molecule (0 associated side effects)

acetic acid: approved small molecule (0 associated side effects) Used to treat infections in the ear canal.

naringenin: experimental small molecule (0 associated side effects)

benzoic acid: experimental small molecule (0 associated side effects)

oxalic acid: experimental small molecule (0 associated side effects)

quercetin: experimental small molecule (0 associated side effects)

citric acid: experimental small molecule (0 associated side effects)

taurocholic acid: experimental small molecule (0 associated side effects)

lactic acid: experimental small molecule (0 associated side effects)

629 known side effects mediated through drugs targeting this protein:

5q minus syndrome Abdominal discomfort Abdominal distension  
Abdominal pain Abdominal pain upper Abnormal dreams  
Abnormal faeces Abscess Acidosis Acne Acute coronary  
syndrome Adrenal insufficiency Affect lability Aggression  
Agitation Agranulocytosis Alanine aminotransferase increased  
Allergic granulomatous angiitis Alopecia Amblyopia  
Amenorrhoea Amnesia Anaemia Anal pruritus  
Anaphylactic shock Anaphylactoid reaction Angina pectoris  
Angioedema Angiopathy Anorectal discomfort Antinuclear  
antibody positive Anxiety Aortic dissection Apathy Aplastic  
anaemia Apnoea Application site reaction Arrhythmia  
Arthralgia Arthritis Arthropathy Artificial menopause  
Aspartate aminotransferase increased Aspiration Asthenia  
Asthma Atelectasis Atopy Atrial fibrillation Atrial  
tachycardia Atrioventricular block complete Atrioventricular block  
first degree Atrioventricular block second degree  
Atrioventricular dissociation Azotaemia Back pain  
Bacteraemia Bacterial infection Balance disorder Basal cell  
carcinoma Benign intracranial hypertension Benign neoplasm  
Benign prostatic hyperplasia Benign vaginal neoplasm  
Bladder disorder Bladder pain Bleeding time prolonged  
Blepharitis Blindness Blood alkaline phosphatase increased  
Blood cholesterol increased Blood creatine phosphokinase  
increased Blood creatinine decreased Blood creatinine increased  
Blood glucose decreased Blood glucose increased Blood  
lactate dehydrogenase increased Blood pressure increased Blood  
triglycerides increased Blood urea increased Body temperature  
increased Bone disorder Bone pain Bradycardia Breast cancer in  
situ Breast cancer stage IV Breast discharge Breast discomfort  
Breast disorder Breast engorgement Breast enlargement  
Breast feeding Breast malformation Breast mass Breast  
neoplasm Breast pain Breast swelling Breast tenderness Bronchitis  
Bronchospasm Bruxism Candidiasis Carbohydrate tolerance  
decreased Cardiac arrest Cardiac disorder Cardiac failure  
Cardiac failure congestive Cardiac fibrillation  
Cardioactive drug level Carpal tunnel syndrome Cataract  
Cellulitis gangrenous Cerebrovascular accident  
Cerebrovascular disorder Cervical discharge Cervix  
carcinoma Cervix disorder Chest discomfort Chest pain Chills  
Chloasma Cholecystitis Cholelithiasis Cholestasis  
Chorea Cognitive disorder Cold sweat Colitis ischaemic  
Colorectal cancer Coma Completed suicide Conduction disorder  
Confusional state Conjunctival hyperaemia Conjunctivitis  
Connective tissue disorder Constipation Contact lens  
intolerance Convulsion Corneal oedema Coronary artery thrombosis  
Cough Cystitis Cystitis noninfective Cystoid macular oedema  
Deafness Death Decreased appetite Deep vein thrombosis  
Delirium Depressed level of consciousness Depression  
Dermatitis Dermatitis atopic Dermatitis contact Dermatitis  
exfoliative Dermatomyositis Diabetic retinopathy Diarrhoea

Diplopia    Discomfort    Dissociation    Disturbance in sexual  
 arousal    Diverticulitis    Dizziness    Drug interaction    Drug rash  
 with eosinophilia and systemic symptoms    Dry eye    Dry mouth    Dry  
 skin    Duodenal ulcer    Dysarthria    Dysgeusia    Dysmenorrhoea  
 Dyspepsia    Dysphagia    Dysphonia    Dysplasia    Dyspnoea  
 Dysuria    Ear disorder    Ear infection    Ear pain  
 Ecchymosis    Ectropion of cervix    Eczema    Elderly  
 Electrocardiogram PR prolongation    Electrocardiogram ST segment  
 Electrocardiogram ST segment depression    Electrocardiogram  
 change    Embolism    Embolism venous    Emotional disorder  
 Encephalitis    Endocrine disorder    Endometrial cancer  
 Endometrial disorder    Endometrial hypertrophy  
 Endometriosis    Enterocolitis    Eosinophilia    Epidermal  
 necrosis    Epidermodysplasia verruciformis    Epilepsy    Epistaxis  
 Erectile dysfunction    Eructation    Erythema    Erythema  
 multiforme    Erythema nodosum    Erythropenia    Euphoric mood  
 Extrasystoles    Eye discharge    Eye disorder    Eye  
 infection    Eye inflammation    Eye irritation    Eye pain    Eyelid  
 oedema    Facial paresis    Family stress    Fasciitis    Fatigue  
 Feeling abnormal    Fibrocystic breast disease    Flat affect  
 Flatulence    Fluid retention    Flushing    Foetal disorder  
 Foetor hepaticus    Fungal infection    Galactorrhoea    Gallbladder  
 disorder    Gamma-glutamyltransferase increased    Gastric disorder  
 Gastric ulcer    Gastritis    Gastroenteritis    Gastrointestinal  
 disorder    Gastrointestinal haemorrhage    Gastrointestinal necrosis  
 Gastrointestinal pain    Gastrointestinal perforation  
 Gastrooesophageal reflux disease    Generalised oedema  
 Genital candidiasis    Genital discharge    Genital disorder  
 female    Gingival bleeding    Glomerular filtration rate decreased  
 Glomerulonephritis    Glossitis    Glossodynia    Glucose tolerance  
 decreased    Glucose tolerance impaired    Glycosuria    Goitre  
 Gynaecomastia    Haemangioma    Haematemesis    Haematoma  
 Haematuria    Haemoglobin    Haemoglobin decreased    Haemolytic  
 anaemia    Haemoptysis    Haemorrhage    Haemorrhagic disorder  
 Haemorrhoids    Hallucination    Headache    Hearing impaired  
 Heart rate irregular    Hemiparesis    Hepatic cirrhosis    Hepatic  
 enzyme increased    Hepatic failure    Hepatic function abnormal  
 Hepatic necrosis    Hepatic neoplasm malignant    Hepatic steatosis  
 Hepatitis cholestatic    Hepatitis chronic active  
 Hepatobiliary disease    Hepatocellular injury    Hepatorenal  
 syndrome    Hereditary angioedema    Hernia    Herpes simplex  
 Herpes virus infection    Herpes zoster    Hiccups    Hirsutism  
 Hormone level abnormal    Hot flush    Hyperaemia    Hyperaesthesia  
 Hypercalcaemia    Hyperglycaemia    Hyperhidrosis  
 Hyperkinesia    Hyperlipidaemia    Hypernatraemia    Hyperplasia  
 Hypersensitivity    Hypertension    Hypertonia  
 Hypertriglyceridaemia    Hypertrophy    Hypoaesthesia  
 Hypoalbuminaemia    Hypocalcaemia    Hypoglycaemia  
 Hypokalaemia    Hyponatraemia    Hypopituitarism    Hypopnoea  
 Hypoproteinaemia    Hypotension    Hypothyroidism    IIIrd nerve  
 paralysis    Ichthyosis acquired    Ileus    Ill-defined disorder  
 Immune system disorder    Inappropriate antidiuretic hormone  
 secretion    Incontinence    Increased appetite    Infarction  
 Infection    Infestation    Inflammation    Influenza    Influenza  
 like illness    Inguinal hernia    Injection site pain    Injection

site reaction      Insomnia      Interstitial lung disease      Intestinal  
 ischaemia      Intestinal obstruction      Intraventricular haemorrhage  
     Iritis      Irritability      Ischaemia      Ischaemic stroke  
     Jaundice      Jaundice cholestatic      Keratitis herpetic  
     Keratopathy      Laboratory test abnormal      Lacrimal disorder  
     Lacrimation increased      Laryngitis      Leiomyoma      Lens disorder  
     Lenticular opacities      Lethargy      Leukocytoclastic vasculitis  
     Leukopenia      Libido decreased      Libido increased      Lip swelling  
     Liver disorder      Liver function test abnormal      Loss of  
 consciousness      Loss of libido      Lung infection      Lymphadenopathy  
     Macular oedema      Malaise      Malnutrition      Mammogram  
 abnormal      Mantle cell lymphoma      Mass      Mediastinal disorder  
     Medical device complication      Melaena      Memory impairment  
     Meningioma benign      Meningitis      Meningitis aseptic      Menopausal  
 symptoms      Menopause      Menorrhagia      Menstrual disorder  
     Menstruation irregular      Mental disorder      Mesenteric vascular  
 insufficiency      Metabolic acidosis      Metrorrhagia      Migraine  
     Mood swings      Mouth ulceration      Muscle contractions involuntary  
     Muscle rigidity      Muscle spasms      Muscular weakness  
     Musculoskeletal discomfort      Musculoskeletal pain  
     Musculoskeletal stiffness      Myalgia      Mydriasis      Myocardial  
 infarction      Myopathy      Myopia      Nail disorder      Nasal congestion  
     Nasopharyngitis      Nausea      Neck pain      Necrosis      Necrotising  
 colitis      Necrotising enterocolitis neonatal      Necrotising fasciitis  
     Neoplasm      Nephritis      Nephropathy      Nephropathy toxic      Nervous  
 system disorder      Nervousness      Neuralgia      Neuritis      Neuropathy  
 peripheral      Neutropenia      Nightmare      Nipple pain      Nocturia      Nodule  
     Nuchal rigidity      Obstruction      Oedema      Oedema genital  
     Oedema peripheral      Oesophageal disorder      Oesophageal spasm  
     Oesophagitis      Oestrogenic effect      Oliguria  
     Ophthalmoplegia      Optic neuritis      Oropharyngeal pain  
     Osteoarthritis      Otitis media      Ovarian cancer      Ovarian  
 cyst      Pain      Pain in extremity      Palpitations      Pancreatitis  
     Pancytopenia      Paraesthesia      Paralysis      Paranoia  
     Paresis      Pathological fracture      Pelvic pain      Perineal pain  
     Pharyngitis      Phlebitis      Photophobia      Photosensitivity reaction  
     Pigmentation disorder      Pleural disorder      Pleural infection  
     Pneumonia      Pneumonia bacterial      Poisoning      Pollakiuria  
     Polyarteritis nodosa      Polymyalgia rheumatica      Polyuria  
     Porphyria      Porphyria non-acute      Postmenopausal haemorrhage  
     Precocious puberty      Protein urine present      Proteinuria  
     Prurigo      Pruritus      Pruritus generalised      Pruritus genital  
     Psychotic disorder      Puberty      Pulmonary congestion  
     Pulmonary embolism      Pulmonary function test decreased  
     Purpura      Pyuria      Rash      Rash erythematous      Rash generalised  
     Rash maculo-papular      Rectal haemorrhage      Regressive  
 behaviour      Renal cancer      Renal failure      Renal failure acute  
     Renal impairment      Renal papillary necrosis      Renal tubular  
 disorder      Renal tubular necrosis      Reproductive tract disorder  
     Respiratory depression      Respiratory disorder      Respiratory  
 failure      Respiratory tract congestion      Respiratory tract infection  
     Retinal artery embolism      Retinal detachment      Retinal  
 disorder      Reye's syndrome      Rhabdomyolysis      Rhinitis      Rhinitis  
 perennial      Rhinorrhoea      Sarcosinaemia      Scab      Scotoma      Sensation  
 of foreign body      Sensory loss      Sepsis      Serum sickness



Sexual dysfunction Shock Sinus bradycardia Sinus congestion  
 Sinus headache Sinus tachycardia Sinusitis Skin disorder  
 Skin exfoliation Skin hypertrophy Skin infection Skin  
 irritation Skin lesion Skin reaction Skin ulcer Sleep disorder  
 Smear cervix abnormal Somnolence Stevens-Johnson syndrome  
 Sticky skin Stomatitis Subcutaneous nodule Supraventricular  
 tachycardia Swelling Syncope Systemic lupus erythematosus  
 Tachycardia Tenderness Tension Tension headache Thirst  
 Throat irritation Thrombocytopenia Thrombocytosis  
 Thrombophlebitis superficial Thrombosis Tinnitus Tonsillitis  
 Tooth abscess Tooth disorder Tooth infection Toothache  
 Toxic epidermal necrolysis Toxic shock syndrome  
 Tracheobronchitis Transaminases increased Tremor  
 Trismus Tubulointerstitial nephritis Ulcer Upper respiratory  
 tract infection Urethral disorder Urinary incontinence Urinary  
 retention Urinary tract disorder Urinary tract infection Urine  
 output increased Urticaria Uterine cancer Uterine cervical  
 erosion Uterine enlargement Uterine haemorrhage Uterine  
 leiomyoma Uterine pain Uterine spasm Uveitis VIIth nerve  
 paralysis Vaginal discharge Vaginal disorder Vaginal haemorrhage  
 Vaginal infection Vaginal neoplasm Vaginal ulceration  
 Vaginismus Varicella Varicose vein Vascular purpura  
 Vasculitis Vasodilation procedure Venous thrombosis Ventricular  
 extrasystoles Ventricular fibrillation Ventricular  
 tachycardia Vertigo Viral infection Vision blurred Visual  
 acuity reduced Visual impairment Vitreous haemorrhage Vomiting  
 Vulval disorder Vulvovaginal candidiasis Vulvovaginal  
 discomfort Vulvovaginal mycotic infection Vulvovaginal pain  
 Vulvovaginal pruritus Vulvovaginitis Weight decreased  
 Weight increased Wheezing Withdrawal bleed Wound haemorrhage  
 Xanthopsia

\*\*\*\*\*  
 \*\*\*\*\*

Potassium voltage-gated channel subfamily KQT member 1 - Group:  
 Channel

Treated with:

indapamide: approved small molecule (192 associated side effects)  
 For the treatment of hypertension, alone or in combination with other antihypertensive drugs, as well as for the treatment of salt and fluid retention associated with congestive heart failure or edema from pregnancy (appropriate only in the management of edema of pathologic origin during pregnancy when clearly needed). Also used for the management of edema as a result of various causes.

bepridil: approved small molecule (0 associated side effects)  
 For the treatment of chronic stable angina (classic effort-associated angina).

192 known side effects mediated through drugs targeting this protein:

Abdominal discomfort Abdominal pain Abdominal pain upper Acne  
 Agitation Agranulocytosis Amblyopia Amnesia Anaemia  
 Anaphylactic shock Angina pectoris Angioedema Anxiety  
 Aplastic anaemia Application site reaction Arrhythmia  
 Arthralgia Arthritis Arthropathy Asthenia Ataxia

Atrial fibrillation    Atrial flutter    Back pain    Blister  
 Blood uric acid increased    Body temperature increased    Bone  
 disorder    Bone pain    Bradycardia    Bronchitis    Bundle branch block  
 Candidiasis    Cardiac fibrillation    Cardiac flutter    Cataract  
 Cerebrovascular accident    Chest pain    Chondrodystrophy    Coma  
 Conjunctivitis    Constipation    Cough    Decreased appetite  
 Dermatitis bullous    Dermatitis exfoliative    Diabetes mellitus  
 Diabetic hyperosmolar coma    Diarrhoea    Discomfort    Disturbance  
 in sexual arousal    Dizziness    Dry mouth    Duodenitis    Dysgeusia  
 Dysmenorrhoea    Dyspepsia    Dysphagia    Dyspnoea    Dysuria  
 Ear disorder    Ear infection    Ear pain    Ecchymosis  
 Electrocardiogram normal    Electrolyte imbalance    Erectile  
 dysfunction    Erythema    Erythema multiforme    Extrasystoles    Face  
 oedema    Fatigue    Feeling abnormal    Flatulence    Flushing  
 Gastritis    Gastroenteritis    Gastrointestinal pain    Glycosuria  
 Gout    Headache    Heart rate irregular    Hepatic function  
 abnormal    Hepatitis    Hernia    Hyperaesthesia    Hyperglycaemia  
 Hyperhidrosis    Hypertonia    Hyperuricaemia    Hypoaesthesia  
 Hypochloroemia    Hypokalaemia    Hyponatraemia    Hypotension  
 Ill-defined disorder    Increased appetite    Infection  
 Influenza    Insomnia    Irritability    Jaundice    Jaundice  
 cholestatic    Laryngitis    Lethargy    Leukopenia    Libido decreased    Liver  
 function test abnormal    Loss of consciousness    Lung disorder  
 Malaise    Migraine    Muscle spasms    Muscle twitching  
 Muscular weakness    Musculoskeletal discomfort    Myalgia  
 Myopathy    Myopia    Nail disorder    Nasopharyngitis  
 Nausea    Neoplasm malignant    Nephritis    Nervousness  
 Neuritis    Neuropathy peripheral    Nocturia    Nodule  
 Oedema peripheral    Oesophagitis    Oliguria    Optic neuritis  
 Oral candidiasis    Orthostatic hypotension    Osteoarthritis  
 Pain    Palpitations    Pancreatitis    Paraesthesia oral  
 Pharyngitis    Photophobia    Photosensitivity reaction    Pneumonia  
 Pollakiuria    Polyuria    Proctitis    Prostatic disorder  
 Pruritus    Purpura    Rash    Renal failure    Renal pain  
 Respiratory distress    Rhabdomyolysis    Rhinitis    Rhinorrhoea  
 Sensory loss    Shock    Sialoadenitis    Sinus bradycardia  
 Sinusitis    Skin mass    Somnolence    Stomatitis    Supraventricular  
 tachycardia    Syncope    Tachycardia    Tension    Thrombocytopenia  
 Thyroid disorder    Tinnitus    Tooth disorder    Toxic epidermal  
 necrolysis    Tubulointerstitial nephritis    Urinary tract infection  
 Urine output increased    Urticaria    Vaginal infection    Vaginal  
 inflammation    Vascular purpura    Vasculitis    Vasculitis necrotising  
 Vasodilation procedure    Ventricular arrhythmia    Ventricular  
 extrasystoles    Vertigo    Vision blurred    Visual impairment  
 Vomiting    Weight decreased    Xanthopsia

\*\*\*\*\*  
 \*\*\*\*\*

Sodium/bile acid cotransporter - Group: Transporter

Treated with:

cyclosporine:    approved    biotech    (0 associated side effects)

For treatment of transplant rejection, rheumatoid arthritis,  
 severe psoriasis

liothyronine:    approved    small molecule    (0 associated side  
 effects)    Used as replacement or supplemental therapy in patients

with hypothyroidism of any etiology, except transient hypothyroidism during the recovery phase of subacute thyroiditis.

conjugated estrogens: approved small molecule (219 associated side effects) For the treatment of moderate to severe vasomotor symptoms associated with the menopause, atrophic vaginitis, osteoporosis, hypoestrogenism due to hypogonadism, castration, primary ovarian failure, breast cancer (for palliation only), and Advanced androgen-dependent carcinoma of the prostate (for palliation only)

indomethacin: approved small molecule (164 associated side effects) For moderate to severe rheumatoid arthritis including acute flares of chronic disease, ankylosing spondylitis, osteoarthritis, acute painful shoulder (bursitis and/or tendinitis) and acute gouty arthritis.

progesterone: approved small molecule (256 associated side effects) For progesterone supplementation or replacement as part of an Assisted Reproductive Technology (ART) treatment for infertile women with progesterone deficiency and for the treatment of secondary amenorrhea. Also used for the reduction of the incidence of endometrial hyperplasia and the attendant risk of endometrial carcinoma in postmenopausal women receiving estrogen replacement therapy, as well as treatment of abnormal uterine bleeding due to hormonal imbalance in the absence of organic pathology such as fibroids or uterine cancer.

testosterone: approved small molecule (274 associated side effects) To be used as hormone replacement or substitution of diminished or absent endogenous testosterone. Use in males: For management of congenital or acquired hypogonadism, hypogonadism associated with HIV infection, and male climacteric (andropause). Use in females: For palliative treatment of androgen-responsive, advanced, inoperable, metastatic (skeletal) carcinoma of the breast in women who are 1-5 years postmenopausal; testosterone esters may be used in combination with estrogens in the management of moderate to severe vasomotor symptoms associated with menopause in women who do not respond to adequately to estrogen therapy alone.

bumetanide: approved small molecule (50 associated side effects) For the treatment of edema associated with congestive heart failure, hepatic and renal disease including the nephrotic syndrome.

ethinyl estradiol: approved small molecule (0 associated side effects) For treatment of moderate to severe vasomotor symptoms associated with the menopause, female hypogonadism, prostatic carcinoma-palliative therapy of advanced disease, breast cancer, as an oral contraceptive, and as emergency contraceptive.

probenecid: approved small molecule (27 associated side effects) For the reduction of serum uric acid concentrations in chronic gouty arthritis and tophaceous gout in patients with frequent disabling gout attacks. Has also been effectively used to promote uric acid excretion in hyperuricemia secondary to the administration of thiazide and related diuretics.

phenobarbital: approved small molecule (54 associated side effects) For the treatment of all types of seizures except absence seizures.

liotrix: approved small molecule (0 associated side effects) May be used to treat primary, secondary or tertiary hypothyroidism. May also be used to suppress thyroid stimulating

hormone (TSH) secretion in patients with simple (nontoxic) goiter, subacute or chronic lymphocytic thyroiditis multinodular goiter, and in the management of thyroid cancer. May be used in conjunction with other antithyroid agents to treat thyrotoxicosis to prevent goitrogenesis and hypothyroidism. May also be used for differential diagnosis of suspected mild hyperthyroidism or thyroid gland autonomy.

ursodeoxycholic acid: approved small molecule (210 associated side effects) The drug reduces cholesterol absorption and is used to dissolve (cholesterol) gallstones in patients who want an alternative to surgery.

glycochenodeoxycholic acid: experimental small molecule (0 associated side effects)

taurocholic acid: experimental small molecule (0 associated side effects)

626 known side effects mediated through drugs targeting this protein:

5q minus syndrome  
Abdominal discomfort Abdominal distension  
Abdominal pain Abdominal pain upper Abdominal symptom  
Abnormal dreams Abortion spontaneous Abscess Acidosis  
Acne Activated partial thromboplastin time prolonged Acute coronary syndrome  
Adenoma benign Affect lability Affective disorder Aggression Agitation Agranulocytosis Alanine aminotransferase increased Alcohol poisoning Alkalosis Alopecia  
Amblyopia Amenorrhoea Amnesia Amyloidosis Anaemia  
Anaemia megaloblastic Anaphylactic shock Anaphylactoid reaction  
Androgenetic alopecia Anger Angina pectoris Angioedema  
Angiopathy Anorectal discomfort Anorectal disorder  
Anxiety Aortic dissection Apathy Aplastic anaemia  
Apnoea Appetite disorder Application site oedema  
Application site reaction Arrhythmia Arterial disorder  
Arthralgia Arthritis Arthropathy Aspartate aminotransferase increased  
Asterixis Asthenia Asthma Ataxia Atrial fibrillation  
Atrioventricular block Atrioventricular block complete  
Atrophy Autonomic neuropathy Azoospermia Azotaemia  
Back pain Benign neoplasm Benign prostatic hyperplasia  
Biliary colic Bladder irritation Bladder pain  
Blindness Blister Blood bilirubin increased Blood cholesterol increased  
Blood creatinine increased Blood glucose decreased Blood glucose increased  
Blood potassium increased Blood pressure diastolic decreased Blood pressure increased  
Blood pressure systolic increased Blood testosterone decreased  
Blood triglycerides increased Blood uric acid increased  
Body temperature increased Bone disorder Bone pain  
Bradycardia Breast cancer Breast discharge Breast discomfort  
Breast disorder Breast enlargement Breast mass Breast neoplasm  
Breast pain Breast swelling Breast tenderness  
Bromsulphthalein test abnormal Bronchitis Candidiasis  
Carbohydrate tolerance decreased Cardiac disorder Cardiac failure  
Cardiac failure congestive Cardiac fibrillation  
Cardiac septal defect Cardiomegaly Cardiomyopathy  
Cardiovascular disorder Cataract Cellulitis gangrenous  
Cerebral artery thrombosis Cerebral haemorrhage Cerebral thrombosis  
Cerebrovascular accident Cervical discharge

Cervix disorder Chest pain Chills Chloasma Choking  
 Cholecystitis Cholestasis Chorea Cleft lip Cleft  
 palate Coagulopathy Cognitive disorder Colitis ischaemic  
 Colitis ulcerative Coma Confusional state Congenital cystic  
 kidney disease Conjunctivitis Connective tissue disorder  
 Constipation Convulsion Corneal deposits Coronary artery  
 disease Coronary artery thrombosis Cough Crohn's disease  
 Crying Cystitis Cystitis noninfective Cytolytic  
 hepatitis Deafness Death Decreased appetite Deep vein  
 thrombosis Dehydration Delirium Dependence Depersonalisation  
 Depressed level of consciousness Depressed mood Depression  
 Depression suicidal Dermatitis Dermatitis acneiform  
 Dermatitis atopic Dermatitis bullous Dermatitis contact  
 Dermatitis exfoliative Diabetes mellitus Diaphragmatic hernia  
 Diarrhoea Diplopia Discomfort Disorientation  
 Disseminated intravascular coagulation Dissociation  
 Disturbance in attention Disturbance in sexual arousal  
 Diverticulum Dizziness Drug abuse Drug dependence Drug  
 hypersensitivity Drug interaction Drug tolerance Dry eye Dry  
 mouth Dry skin Duodenal ulcer Dysarthria Dysgeusia Dyskinesia  
 Dysmenorrhoea Dyspareunia Dyspepsia Dysphagia Dysplasia  
 Dyspnoea Dysuria Ear discomfort Ear disorder Ear  
 infection Ear pain Ecchymosis Ectropion of cervix Effusion  
 Electrolyte imbalance Embolism Embolism venous Emotional  
 disorder Emotional distress Encephalopathy Endocrine  
 disorder Endometrial cancer Endometrial hypertrophy  
 Endometrial sarcoma Endometriosis Enlarged clitoris  
 Enterocolitis Epidermal necrosis Epididymitis  
 Epilepsy Epistaxis Erectile dysfunction Eructation  
 Erythema Erythema multiforme Erythema nodosum Eye  
 disorder Face oedema Fasciitis Fasting Fatigue Feeling  
 abnormal Feeling drunk Fibrocystic breast disease Fibrosis  
 Flat affect Flatulence Fluid retention Flushing Foetor  
 hepatic Folliculitis Fungal infection Gait disturbance  
 Galactorrhoea Gallbladder disorder Gamma-  
 glutamyltransferase increased Gastric disorder Gastric  
 perforation Gastric ulcer Gastritis Gastroenteritis  
 Gastrointestinal disorder Gastrointestinal haemorrhage  
 Gastrointestinal pain Gastrooesophageal reflux disease  
 Generalised oedema Genital candidiasis Genital discharge  
 Gingival blister Gingival erythema Gingival pain Gingivitis  
 Glucose tolerance decreased Glucose tolerance impaired  
 Glycosuria Granuloma Growth accelerated Gynaecomastia  
 Haemangioma Haemarthrosis Haematocrit increased Haematuria  
 Haemoglobin Haemoglobin abnormal Haemoglobin increased  
 Haemolytic anaemia Haemoptysis Haemorrhage intracranial  
 Haemorrhagic disorder Hair colour changes Hair growth  
 abnormal Hallucination Hangover Headache Hearing impaired  
 Heart disease congenital Heat rash Hepatic enzyme  
 increased Hepatic failure Hepatic function abnormal Hepatic  
 necrosis Hepatic neoplasm Hepatic neoplasm malignant Hepatitis  
 Hepatitis cholestatic Hepatobiliary disease Hepatocellular  
 injury Hereditary disorder Hernia Herpes simplex  
 Herpes virus infection High density lipoprotein decreased  
 Hirsutism Hormone level abnormal Hostility Hot flush

Hyperaesthesia    Hypercalcaemia    Hypercholesterolaemia  
 Hyperglycaemia    Hyperhidrosis    Hyperkalaemia  
 Hyperkinesia    Hyperlipidaemia    Hypernatraemia    Hyperplasia  
 Hypersensitivity    Hypertension    Hypertonia    Hypertonic  
 bladder    Hypertriglyceridaemia    Hypertrophy    Hyperuricaemia  
 Hyperventilation    Hypoaesthesia    Hypocalcaemia  
 Hypochloraemia    Hypogeusia    Hypoglycaemia    Hypokalaemia  
 Hyponatraemia    Hypotension    Hypothyroidism    Hypoventilation  
 Hypoxia    Ileitis    Ileus    Ill-defined disorder    Immune  
 system disorder    Impatience    Incontinence    Increased appetite  
 Induration    Infarction    Infection    Infestation    Inflammation  
 Influenza    Influenza like illness    Injection site inflammation  
 Injection site pain    Injection site reaction    Insomnia  
 International normalised ratio increased    Interstitial lung  
 disease    Intestinal ulcer    Irritability    Jaundice    Jaundice  
 cholestatic    Laboratory test abnormal    Lacrimal disorder    Lacrimation  
 increased    Laryngeal oedema    Laryngitis    Leiomyoma    Lethargy  
 Leukaemia    Leukopenia    Leukoplakia    Libido decreased    Libido  
 increased    Lipids abnormal    Lipids increased    Liver disorder    Liver  
 function test abnormal    Liver injury    Loss of consciousness    Lung  
 disorder    Lung infection    Lung infiltration    Lung neoplasm  
 Lymphadenopathy    Macule    Malaise    Mass    Mediastinal  
 disorder    Melaena    Memory impairment    Meningioma benign    Menopausal  
 symptoms    Menorrhagia    Menstrual disorder    Menstruation irregular  
 Mental disability    Mental disorder    Metrorrhagia    Micturition  
 urgency    Migraine    Mood swings    Mouth ulceration    Muscle rigidity  
 Muscle spasms    Muscular weakness    Musculoskeletal discomfort  
 Musculoskeletal disorder    Musculoskeletal pain  
 Musculoskeletal stiffness    Myalgia    Myocardial infarction  
 Myopathy    Nasal congestion    Nasal discomfort    Nasal oedema  
 Nasopharyngitis    Nausea    Neck pain    Necrosis    Necrotising  
 colitis    Necrotising enterocolitis neonatal    Necrotising fasciitis  
 Neoplasm    Neoplasm malignant    Neoplasm prostate    Nephritic  
 syndrome    Nephritis    Nephropathy    Nephrotic syndrome    Nervous  
 system disorder    Nervousness    Neuritis    Neuropathy peripheral    Night  
 sweats    Nightmare    Nipple disorder    Nipple pain    Nocturia  
 Nodule    Nuchal rigidity    Obstruction    Oedema    Oedema  
 peripheral    Oesophageal disorder    Oesophagitis    Oliguria    Optic  
 neuritis    Oral disorder    Orthostatic hypotension  
 Osteoarthritis    Osteomalacia    Otitis media    Ovarian  
 cancer    Ovarian cyst    Ovarian failure    Ovarian  
 hyperstimulation syndrome    Pain in extremity    Palpitations  
 Pancreatitis    Pancreatitis acute    Pancytopenia  
 Paraesthesia    Parosmia    Patent ductus arteriosus  
 Pathological fracture    Peliosis hepatis    Pelvic pain    Penile pain  
 Penis disorder    Peptic ulcer    Pericardial effusion  
 Pericarditis    Perineal pain    Peripheral vascular disorder  
 Personality disorder    Petechiae    Pharyngitis    Phlebitis  
 Phobia    Photosensitivity reaction    Pigmentation disorder  
 Pituitary tumour    Platelet aggregation decreased    Platelet  
 count decreased    Pleural disorder    Pleural effusion    Pneumonia  
 Pneumothorax    Pollakiuria    Polycythaemia    Polyp    Polyuria  
 Porphyria    Precocious puberty    Premature ejaculation  
 Premenstrual syndrome    Presyncope    Priapism    Proctalgia  
 Proctitis    Prostate cancer    Prostatic adenoma    Prostatic

disorder Prostatic specific antigen increased Prostatitis  
 Prostatomegaly Protein urine present Proteinuria Prothrombin  
 level increased Pruritus genital Psoriasis Psychotic disorder  
 Puberty Pulmonary embolism Pulmonary fibrosis  
 Pulmonary function test decreased Pulmonary haemorrhage  
 Pulmonary hypertension Pulmonary oedema Purpura Rash  
 generalised Rash papular Rectal haemorrhage Rectal tenesmus  
 Red blood cell count increased Renal colic Renal failure  
 Renal impairment Respiratory depression Respiratory disorder  
 Respiratory failure Respiratory tract infection Retinal  
 disorder Retinopathy of prematurity Rhinitis Salivary gland  
 enlargement Scar Seborrhoeic dermatitis Sedation Sensitisation  
 Sensory loss Serum sickness Shock Sinusitis Skin  
 discolouration Skin disorder Skin exfoliation Skin hypertrophy  
 Skin irritation Skin mass Skin papilloma Skin tightness  
 Skin ulcer Sleep apnoea syndrome Sleep disorder Smear  
 cervix abnormal Soft tissue disorder Somnolence Speech disorder  
 Stomatitis Stupor Subcutaneous nodule Suicidal ideation  
 Surgery Swelling Swollen tongue Syncope Tachycardia  
 Tenderness Tension Testicular atrophy Thirst  
 Throat tightness Thrombocytopenia Thrombocytopenic purpura  
 Thrombophlebitis superficial Thrombosis Tinnitus Tooth  
 abscess Tooth disorder Toothache Toxic epidermal necrolysis  
 Transaminases increased Transient ischaemic attack  
 Tremor Tubulointerstitial nephritis Ulcer Ulcer haemorrhage  
 Upper respiratory tract infection Urethral disorder Urinary  
 hesitation Urinary incontinence Urinary retention Urinary tract  
 disorder Urinary tract infection Urine output increased  
 Urogenital disorder Urticaria Uterine cancer Uterine  
 cervical erosion Uterine leiomyoma Uterine spasm Vaginal discharge  
 Vaginal haemorrhage Vaginal infection Vaginal inflammation  
 Varicocele Varicose vein Vascular purpura Vasculitis  
 Vasodilation procedure Venous thrombosis Ventricular septal  
 defect Vertigo Viral infection Virilism Vision blurred  
 Visual acuity reduced Visual impairment Vitreous detachment  
 Vomiting Vulvovaginal candidiasis Vulvovaginal  
 discomfort Vulvovaginal dryness Vulvovaginal mycotic infection  
 Vulvovaginal pruritus Weight decreased Weight increased  
 Withdrawal bleed Xerophthalmia

\*\*\*\*\*  
 \*\*\*\*\*

Glutamate receptor 3 - Group: Channel

Treated with:

l-glutamic acid: approved, nutraceutical small molecule (0  
 associated side effects) Considered to be nature's "Brain food"  
 by improving mental capacities; helps speed the healing of ulcers;  
 gives a "lift" from fatigue; helps control alcoholism, schizophrenia  
 and the craving for sugar.

lithium: approved small molecule (141 associated side  
 effects) Lithium is used as a mood stabilizer, and is used for  
 treatment of depression and mania. It is often used in bipolar  
 disorder treatment.

aniracetam: experimental small molecule (0 associated side  
 effects)

141 known side effects mediated through drugs targeting this protein:

Abdominal discomfort Abdominal pain Acne Agitation Albuminuria  
Alopecia Anaemia Angioedema Arrhythmia Arthralgia  
Asthenia Ataxia Atrophy Benign intracranial  
hypertension Blindness Blood creatinine decreased Blood  
thyroid stimulating hormone increased Body temperature increased  
Bradycardia Brugada syndrome Chest discomfort Clonus  
Cogwheel rigidity Coma Confusional state Convulsion  
Coordination abnormal Death Decreased appetite Dehydration  
Dental caries Depressed level of consciousness Dermatitis  
Diabetes insipidus Diabetes mellitus Diarrhoea Discomfort  
Disorientation Dizziness Dry mouth Dry skin Dysarthria  
Dysgeusia Dyspepsia Dystonia Electrocardiogram change  
Electrolyte imbalance Encephalopathy Erectile dysfunction  
Exophthalmos Extrapyrarnidal disorder Faecal  
incontinence Fatigue Feeling abnormal Feeling cold  
Flatulence Folliculitis Gastritis Gastrointestinal pain  
Glycosuria Goitre Hallucination Headache  
Hypercalcaemia Hyperglycaemia Hyperparathyroidism  
Hyperreflexia Hypersensitivity Hyperthyroidism Hypertonia  
Hypertrophy Hyperventilation Hypotension Hypothyroidism  
Incontinence Infection Intracranial pressure increased  
Lethargy Leukocytoclastic vasculitis Leukocytosis  
Leukopenia Lip swelling Loss of consciousness Mass  
Memory impairment Mental disorder due to a general medical  
condition Muscle contractions involuntary Muscle rigidity  
Muscle twitching Muscular weakness Musculoskeletal discomfort  
Myasthenia gravis Myxoedema Nausea Nephrogenic diabetes  
insipidus Nephropathy toxic Nystagmus Oedema Oedema peripheral  
Oliguria Optic atrophy Optic neuritis Pain  
Papilloedema Parathyroid disorder Peripheral coldness  
Poisoning Polydipsia Polyuria Pruritus Pruritus  
generalised Psoriasis Psychomotor retardation Rash Raynaud's  
phenomenon Salivary gland enlargement Salivary hypersecretion  
Scotoma Sexual dysfunction Shock Sinus arrhythmia Skin  
ulcer Sluggishness Somnolence Stupor Swelling Syncope  
Thirst Tic Tinnitus Tremor Ulcer Urinary  
incontinence Urine output increased Vasculitis Vertigo  
Vision blurred Vomiting Weight decreased Weight increased  
Xerosis

\*\*\*\*\*  
\*\*\*\*\*

Small conductance calcium-activated potassium channel protein 2 -  
Group: Channel

Treated with:

miconazole: approved small molecule (33 associated side effects)

For topical application in the treatment of tinea pedis  
(athlete's foot), tinea cruris, and tinea corporis caused  
by *Trichophyton rubrum*, *Trichophyton*  
*mentagrophytes*, and *Epidermophyton*  
*floccosum*, in the treatment of cutaneous candidiasis  
(moniliasis), and in the treatment of tinea versicolor.

33 known side effects mediated through drugs targeting this protein:



Abdominal pain Anaphylactic shock Anaphylactoid reaction  
 Angioedema Breast disorder Burning sensation Cardiac disorder  
 Dermatitis Dermatitis contact Erythema Gastrointestinal  
 pain Genital burning sensation Genital discharge Headache  
 Immune system disorder Muscle spasms Nausea Nervous  
 system disorder Oedema Pain Pelvic pain Pruritus genital Rash  
 Respiratory disorder Respiratory tract infection Upper  
 respiratory tract infection Urethral disorder Urinary tract disorder  
 Urinary tract infection Urticaria Vaginal discharge  
 Vulvovaginal discomfort Vulvovaginal erythema

\*\*\*\*\*  
 \*\*\*\*\*

Lutropin-choriogonadotropic hormone receptor - Group: Receptor

Treated with:

goserelin: approved small molecule (0 associated side effects)

Used to treat hormone-sensitive cancers of the breast (in pre- and peri-menopausal women) and prostate, and some benign gynaecological disorders (endometriosis, uterine fibroids and endometrial thinning). In addition, goserelin is used in assisted reproduction and in the treatment of precocious puberty.

menotropins: approved biotech (0 associated side effects)

For the treatment of female infertility

lutropin alfa: approved biotech (0 associated side effects)

For treatment of female infertility

cetrorelix: approved small molecule (30 associated side effects)

For the inhibition of premature LH surges in women undergoing controlled ovarian stimulation

choriogonadotropin alfa: approved biotech (0 associated side effects) For the treatment of female infertility

buserelin: approved biotech (0 associated side effects)

30 known side effects mediated through drugs targeting this protein:

Anaphylactic shock Anaphylactoid reaction Anencephaly Ascites  
 Assisted fertilisation Cardiac septal defect Congenital  
 anomaly Developmental delay Developmental glaucoma  
 Diaphragmatic hernia Erythema Glaucoma Headache  
 Hernia Hypersensitivity Hypovolaemia Imperforate hymen  
 Klinefelter's syndrome Melanocytic naevus Nausea  
 Oliguria Ovarian hyperstimulation syndrome Pruritus  
 Stillbirth Strabismus Supernumerary nipple Swelling  
 Trisomy 18 Trisomy 21 Ventricular septal defect

\*\*\*\*\*  
 \*\*\*\*\*

Mast/stem cell growth factor receptor - Group: Enzyme

Treated with:

sorafenib: approved small molecule (130 associated side effects) For the treatment of patients with advanced renal cell carcinoma.

imatinib: approved small molecule (248 associated side effects) For the treatment Philadelphia chromosome positive chronic myeloid leukemia (CML) and malignant gastrointestinal stromal tumors (GIST).

dasatinib: approved small molecule (251 associated side effects) For the treatment of adults with chronic, accelerated, or myeloid or lymphoid blast phase chronic myeloid leukemia with

resistance or intolerance to prior therapy. Also indicated for the treatment of adults with Philadelphia chromosome-positive acute lymphoblastic leukemia with resistance or intolerance to prior therapy.

sunitinib: approved small molecule (198 associated side effects) For the treatment of advanced renal cell carcinoma as well as the treatment of gastrointestinal stromal tumor after disease progression on or intolerance to imatinib mesylate.

phosphotyrosine: experimental small molecule (0 associated side effects)

adenosine-5'-diphosphate: experimental small molecule (0 associated side effects)

nilotinib: approved small molecule (223 associated side effects) For the potential treatment of various leukemias, including chronic myeloid leukemia (CML).

518 known side effects mediated through drugs targeting this protein:

Abdominal discomfort Abdominal distension Abdominal pain  
Abdominal pain upper Acne Acute coronary syndrome Acute febrile neutrophilic dermatosis Acute generalised exanthematous pustulosis Acute hepatic failure Acute respiratory distress syndrome Adrenal insufficiency Affect lability Ageusia  
Alanine aminotransferase increased Alopecia Alveolar proteinosis Amnesia Anaemia Anal fissure Angina pectoris  
Angioedema Angiopathy Anxiety Aortic dissection Aphagia  
Apthous stomatitis Aplasia Aplasia pure red cell  
Aplastic anaemia Apoptosis Arrhythmia Arterial disorder  
Arthralgia Arthritis Ascites Aspartate aminotransferase increased Assisted fertilisation Asthenia Asthma Atrial fibrillation Atrial flutter Back pain Blepharitis Blindness  
Blindness cortical Blister Blood albumin decreased  
Blood alkaline phosphatase increased Blood amylase increased  
Blood bilirubin increased Blood bilirubin unconjugated increased  
Blood creatine phosphokinase increased Blood creatinine increased  
Blood disorder Blood glucose decreased Blood glucose increased  
Blood lactate dehydrogenase increased Blood magnesium decreased  
Blood phosphorus decreased Blood potassium decreased  
Blood potassium increased Blood sodium increased Blood thyroid stimulating hormone increased  
Blood urea increased Blood uric acid increased Body temperature increased Bone marrow necrosis  
Bone pain Bradycardia Brain oedema Breast disorder Breast enlargement Breast feeding Breast pain  
Bronchitis Bronchospasm Calcinosis Candidiasis Cardiac disorder Cardiac failure  
Cardiac failure acute Cardiac failure congestive Cardiac fibrillation Cardiac flutter Cardiac hypertrophy  
Cardiac murmur Cardiac tamponade Cardiogenic shock Cardiomegaly Cardiomyopathy Cell death  
Cerebral haemorrhage Cerebral infarction Cerebrovascular accident Chest pain Chills  
Cholangitis Cholecystitis Cholestasis Chronic myeloid leukaemia Coagulopathy Colitis Completed suicide  
Confusional state Congenital skin disorder Congestive cardiomyopathy Conjunctival haemorrhage  
Conjunctivitis Connective tissue disorder Constipation Convulsion Cor pulmonale  
Coronary artery disease Cough Cytogenetic

abnormality Deafness Death Decreased appetite Deep vein  
thrombosis Dehydration Delirium tremens Depressed mood Dermatitis  
Dermatitis bullous Dermatitis exfoliative Dermatitis  
psoriasiform Diabetes mellitus Diarrhoea Diastolic dysfunction  
Diplopia Discomfort Disease progression Disorientation  
Disturbance in sexual arousal Diverticulitis Dizziness  
Drug eruption Drug interaction Dry eye Dry mouth Dry  
skin Dysgeusia Dyspepsia Dysphagia Dysphonia Dyspnoea  
Dyspnoea exertional Dysuria Ear haemorrhage Ear pain  
Ecchymosis Eczema Effusion Ehlers-Danlos syndrome  
Ejection fraction decreased Electrocardiogram PR interval  
Electrocardiogram QT prolonged Embolism Embolism venous  
Endocrine disorder Enterocolitis Eosinophilia  
Epistaxis Erectile dysfunction Erythema Erythema  
multiforme Erythema nodosum Extrasystoles Eye disorder Eye  
haemorrhage Eye irritation Eye oedema Eye pain Eye swelling  
Face oedema Fatigue Febrile neutropenia Feeling abnormal  
Feeling cold Fibrosis Fistula Flank pain Flatulence  
Fluid retention Flushing Folliculitis Gastric  
haemorrhage Gastric ulcer Gastritis Gastroenteritis  
Gastrointestinal disorder Gastrointestinal haemorrhage  
Gastrointestinal neoplasm Gastrointestinal pain  
Gastrointestinal perforation Gastrointestinal tract irritation  
Gastrointestinal ulcer Gastrooesophageal reflux disease  
Generalised oedema Genital rash Gingival bleeding  
Gingival pain Gingivitis Glaucoma Glossitis Glossodynia  
Gout Gravitational oedema Gynaecomastia Haematemesis  
Haematochezia Haematological malignancy Haematoma  
Haematuria Haemoglobin decreased Haemoptysis Haemorrhage  
Haemorrhage intracranial Haemorrhoids Hair colour  
changes Headache Hearing impaired Heat rash Hepatic enzyme  
increased Hepatic failure Hepatic function abnormal Hepatic  
necrosis Hepatic neoplasm malignant Hepatitis Hepatobiliary  
disease Hepatomegaly Herpes simplex Herpes virus infection  
Herpes zoster Hormone level abnormal Hyperaesthesia  
Hypercalcaemia Hyperglycaemia Hyperhidrosis  
Hyperkalaemia Hypernatraemia Hyperphosphataemia  
Hyperplasia Hypersensitivity Hypertension Hypertensive  
crisis Hyperthyroidism Hypertrophy Hyperuricaemia  
Hypoaesthesia Hypoalbuminaemia Hypocalcaemia Hypogeusia  
Hypoglycaemia Hypokalaemia Hypomagnesaemia  
Hyponatraemia Hypophosphataemia Hypotension Hypothyroidism  
Ileus Ill-defined disorder Immune system disorder  
Immunosuppression Incontinence Increased appetite  
Infarction Infection Infestation Inflammation Influenza  
Influenza like illness Insomnia Interstitial lung disease  
Intestinal obstruction Intra-abdominal haematoma  
Intracranial pressure increased Ischaemia Jaundice Joint  
swelling Keratoacanthoma Lacrimation increased Left ventricular  
dysfunction Left ventricular failure Leukocytosis Leukoderma  
Leukoencephalopathy Leukopenia Libido decreased Lipase  
increased Livedo reticularis Liver disorder Liver function  
test abnormal Lividity Localised oedema Loss of consciousness  
Lower respiratory tract infection Lung disorder Lung  
infiltration Lung neoplasm malignant Lymphoma Lymphopenia

Macular oedema Malaise Mastocytic leukaemia Mastocytoma  
 Mediastinal disorder Melaena Memory impairment Menorrhagia  
 Menstruation irregular Mental disorder Metastasis Metastatic  
 neoplasm Metastatic renal cell carcinoma Metrorrhagia  
 Microangiopathy Micturition urgency Migraine Milia Mood  
 swings Mouth ulceration Mucosal dryness Mucosal inflammation  
 Muscle spasms Muscular weakness Musculoskeletal chest pain  
 Musculoskeletal discomfort Musculoskeletal disorder  
 Musculoskeletal pain Musculoskeletal stiffness Myalgia  
 Myelodysplastic syndrome Myeloproliferative disorder  
 Myocardial infarction Myocardial ischaemia Myocarditis  
 Myopathy Myositis Nail disorder Nasopharyngitis  
 Nausea Necrosis Necrosis ischaemic Neoplasm  
 malignant Nephritis Nephropathy Nephropathy toxic Nephrotic  
 syndrome Nervous system disorder Neuritis Neuropathy  
 peripheral Neutropenia Neutropenic colitis Night sweats  
 Nocturia Obstruction Oedema Oedema peripheral Oesophageal  
 disorder Oesophagitis Oesophagitis ulcerative  
 Opportunistic infection Optic neuritis Oral pain  
 Oropharyngeal discomfort Oropharyngeal pain  
 Osteonecrosis Ovarian disorder Pain Pain in extremity  
 Palmar-plantar erythrodysaesthesia syndrome Palpitations  
 Pancreatic disorder Pancreatitis Pancytopenia  
 Panniculitis Papilloedema Papilloma Paraesthesia  
 Parity Pericardial effusion Pericarditis Periorbital  
 oedema Peripheral coldness Peripheral sensory neuropathy  
 Petechiae Pharyngitis Photophobia Photosensitivity reaction  
 Pigmentation disorder Platelet aggregation abnormal  
 Platelet count decreased Pleural disorder Pleural effusion  
 Pleurisy Pleuritic pain Pneumonia Pollakiuria Posterior  
 reversible encephalopathy syndrome Primary hypothyroidism Protein  
 urine present Protein-losing gastroenteropathy Proteinuria  
 Prurigo Pruritus Psoriasis Pulmonary arterial  
 hypertension Pulmonary embolism Pulmonary fibrosis  
 Pulmonary haemorrhage Pulmonary hypertension Pulmonary oedema  
 Purpura Rash Rash erythematous Rash follicular Rash  
 generalised Rash macular Rash maculo-papular Rash papular  
 Rash pustular Rash vesicular Reflux oesophagitis  
 Regressive behaviour Renal failure Renal failure acute  
 Renal impairment Renal tubular disorder Respiratory distress  
 Respiratory tract infection Retinal haemorrhage  
 Retroperitoneal haemorrhage Rhabdomyolysis Rhinitis  
 Rhinorrhoea Sciatica Scleral haemorrhage Sepsis  
 Sexual dysfunction Sexually active Shock Shock  
 haemorrhagic Sinusitis Skin cancer Skin discolouration Skin  
 disorder Skin exfoliation Skin irritation Skin ulcer Social  
 avoidant behaviour Soft tissue disorder Somnolence Splinter  
 haemorrhages Squamous cell carcinoma Stomatitis Sibileus  
 Swelling Swelling face Syncope Systemic lupus  
 erythematosus Systemic lupus erythematosus rash Systemic  
 mastocytosis Tachycardia Temperature intolerance Tenderness  
 Tendonitis Testicular disorder Throat irritation  
 Thrombocytopenia Thrombocytosis Thrombophlebitis Thrombosis  
 Thrombotic microangiopathy Thyroid disorder Thyroiditis  
 Tinnitus Tongue ulceration Torsade de pointes Toxic

epidermal necrolysis Toxic skin eruption Transient ischaemic  
 attack Tremor Tubulointerstitial nephritis Tumour lysis  
 syndrome Tumour necrosis Tumour pain Ulcer Upper respiratory  
 tract infection Urethral disorder Urinary incontinence Urinary  
 tract disorder Urinary tract infection Urticaria Urticaria  
 vesiculosa Uterine haemorrhage Vaginal discharge Vaginal  
 haemorrhage Varicella Varices oesophageal Varicose vein  
 Vascular purpura Venous thrombosis Ventricular arrhythmia  
 Ventricular dysfunction Ventricular failure Ventricular  
 tachycardia Vertigo Viral infection Vision blurred Visual  
 acuity reduced Visual impairment Vitreous haemorrhage Vomiting  
 Weight decreased Weight increased Wound haemorrhage Yellow skin  
 \*\*\*\*\*  
 \*\*\*\*\*

Ephrin type-B receptor 4 - Group: Enzyme

Treated with:

n-(5-chloro-1,3-benzodioxol-4-yl)-6-methoxy-7-(3-piperidin-1-ylpropoxy)quinazolin-4-amine: experimental small molecule  
 (0 associated side effects)  
 n'-(5-chloro-1,3-benzodioxol-4-yl)-n-(3,4,5-trimethoxyphenyl)pyrimidine-2,4-diamine: experimental small molecule  
 (0 associated side effects)  
 n'-(3-chloro-4-methoxy-phenyl)-n-(3,4,5-trimethoxyphenyl)-1,3,5-triazine-2,4-diamine: experimental small molecule (0 associated side effects)  
 3-({4-[(5-chloro-1,3-benzodioxol-4-yl)amino]pyrimidin-2-yl}amino)benzenesulfonamide: experimental small molecule (0 associated side effects)  
 n'-(5-chloro-1,3-benzodioxol-4-yl)-n-(3-methylsulfonylphenyl)pyrimidine-2,4-diamine: experimental small molecule (0 associated side effects)  
 n-[3-[[4-[(5-chloro-1,3-benzodioxol-4-yl)amino]pyrimidin-2-yl]amino]phenyl]methanesulfonamide: experimental small molecule (0 associated side effects)  
 n'-(5-chloro-1,3-benzodioxol-4-yl)-n-(3-morpholin-4-ylphenyl)pyrimidine-2,4-diamine: experimental small molecule (0 associated side effects)  
 3-({4-[(5-chloro-1,3-benzodioxol-4-yl)amino]pyrimidin-2-yl}amino)benzamide: experimental small molecule (0 associated side effects)

known side effects mediated through drugs targeting this protein:

\*\*\*\*\*  
 \*\*\*\*\*

Outer-membrane lipoprotein lolB - Group: Receptor

Treated with:

1-methoxy-2-[2-(2-methoxy-ethoxy)-ethane]: experimental small molecule  
 (0 associated side effects)

known side effects mediated through drugs targeting this protein:

\*\*\*\*\*  
 \*\*\*\*\*

Gamma-aminobutyric acid receptor subunit epsilon - Group: Channel

Treated with:

lorazepam: approved small molecule (126 associated side effects) For the management of anxiety disorders, and for treatment of status epilepticus.

temazepam: approved small molecule (35 associated side effects) For the short-term treatment of insomnia (generally 7-10 days).

clobazam: illicit,approved small molecule (58 associated side effects) For treatment and management of epilepsy and anxiety disorder.

alprazolam: illicit,approved small molecule (178 associated side effects) For the management of anxiety disorder or the short-term relief of symptoms of anxiety and for the treatment of panic disorder, with or without agoraphobia.

chlordiazepoxide:illicit,approved small molecule (20 associated side effects) For the management of anxiety disorders or for the short-term relief of symptoms of anxiety, withdrawal symptoms of acute alcoholism, and preoperative apprehension and anxiety.

adinazolam: approved small molecule (0 associated side effects) For the treatment of anxiety and status epilepticus.

clorazepate: illicit,approved small molecule (0 associated side effects) For the management of anxiety disorders or for the short-term relief of the symptoms of anxiety. Also used as adjunctive therapy in the management of partial seizures and for the symptomatic relief of acute alcohol withdrawal.

midazolam: illicit,approved small molecule (119 associated side effects) For use as a sedative perioperatively.

flurazepam: illicit,approved small molecule (62 associated side effects) For short-term and intermittent use in patients with recurring insomnia and poor sleeping habits

halazepam: illicit,approved small molecule (0 associated side effects) Used to relieve anxiety, nervousness, and tension associated with anxiety disorders.

diazepam: illicit,approved small molecule (149 associated side effects) Used in the treatment of severe anxiety disorders, as a hypnotic in the short-term management of insomnia, as a sedative and premedicant, as an anticonvulsant, and in the management of alcohol withdrawal syndrome.

oxazepam: approved small molecule (36 associated side effects) For the treatment of anxiety disorders and alcohol withdrawal.

triazolam: illicit,approved,withdrawn small molecule (66 associated side effects) For the short-term treatment of insomnia.

clonazepam: illicit,approved small molecule (228 associated side effects) Used as an anticonvulsant in the treatment of the Lennox-Gastaut syndrome (petit mal variant), akinetic and myoclonic seizures.

estazolam: illicit,approved small molecule (131 associated side effects) For the short-term management of insomnia characterized by difficulty in falling asleep, frequent nocturnal awakenings, and/or early morning awakenings.

bromazepam:illicit,approved small molecule (47 associated side effects) For the short-term treatment of insomnia, short-term treatment of anxiety or panic attacks, if a benzodiazepine is

required, and the alleviation of the symptoms of alcohol- and opiate-withdrawal.

clotiazepam: illicit, approved small molecule (0 associated side effects) For the treatment of anxiety disorders.

fludiazepam: illicit, approved small molecule (0 associated side effects) Used for the short-term treatment of anxiety disorders.

ketazolam: approved small molecule (0 associated side effects)

Ketazolam could be used for the treatment of anxiety. In approved countries, it is indicated for the treatment of anxiety, tension, irritability and similar stress related symptoms.

prazepam: illicit, approved small molecule (0 associated side effects) For the treatment of anxiety disorders.

quazepam: illicit, approved small molecule (0 associated side effects) Used to treat insomnia.

cinolazepam: approved small molecule (0 associated side effects) For the management of anxiety disorders or for the short-term relief of the symptoms of anxiety or anxiety associated with depressive symptoms.

nitrazepam: approved small molecule (44 associated side effects)

Used to treat short-term sleeping problems (insomnia), such as difficulty falling asleep, frequent awakenings during the night, and early-morning awakening.

486 known side effects mediated through drugs targeting this protein:

Abdominal discomfort Abdominal distension Abdominal pain  
Abnormal dreams Abnormal faeces Acidosis Acne Affect  
labiality Ageusia Aggression Agitation Agranulocytosis  
Akathisia Akinesia Alcohol poisoning Alopecia Altered  
state of consciousness Amblyopia Amnesia Anaemia  
Anaphylactic shock Anaphylactoid reaction Anger Angioedema  
Angiopathy Anorectal discomfort Anorectal disorder  
Anterograde amnesia Anxiety Aortic dissection Apathy  
Aphonia Apnoea Appetite disorder Arrhythmia Arterial  
spasm Arthralgia Arthritis Aspartate aminotransferase increased  
Aspiration Asthenia Asthma Ataxia Athetosis  
Atrioventricular block Back pain Balance disorder Bladder  
dysfunction Bladder pain Blindness Blood alkaline phosphatase  
increased Blood bilirubin increased Blood disorder Blood  
glucose decreased Blood thromboplastin decreased Body temperature  
decreased Body temperature increased Borderline personality  
disorder Bradycardia Bradyphrenia Brain oedema Breast  
disorder Breast pain Breast swelling Bronchitis Bronchospasm  
Candidiasis Carbon dioxide increased Cardiac arrest  
Cardiac disorder Cardiac failure Cardio-respiratory arrest  
Cardiovascular disorder Cellulitis Cerebellar syndrome  
Chest discomfort Chest pain Chills Choking sensation  
Chorea Chromaturia Clonic convulsion Clonus Clumsiness  
Coagulopathy Cognitive disorder Coma Completed suicide  
Confusional state Connective tissue disorder Constipation  
Conversion disorder Convulsion Coordination abnormal Cough  
Cyanosis Cystitis Cystitis noninfective Cytolytic  
hepatitis Deafness Death Decreased appetite Dehydration  
Delirium Delirium tremens Delusion Dependence

Depersonalisation Depressed level of consciousness Depressed  
 mood Depression Depressive symptom Derealisation Dermatitis  
 Dermatitis contact Dermatitis exfoliative Diarrhoea  
 Diplopia Discomfort Disinhibition Disorientation  
 Disturbance in attention Disturbance in sexual arousal  
 Dizziness Drooling Drug abuse Drug dependence Drug  
 eruption Drug intolerance Drug withdrawal convulsions Dry mouth  
 Dry skin Dysaesthesia Dysarthria Dysgeusia Dyskinesia  
 Dysmenorrhoea Dyspepsia Dysphagia Dysphonia Dysphoria  
 Dyspnoea Dysthymic disorder Dystonia Dysuria Ear  
 infection Ear pain Ecchymosis Effusion Ejaculation delayed  
 Ejaculation failure Emotional disorder Emotional  
 distress Emotional poverty Encephalopathy Encopresis Endometrial  
 sarcoma Energy increased Enterocolitis Enuresis  
 Eosinophilia Epilepsy Epistaxis Erectile dysfunction  
 Erythema Erythema multiforme Euphoric mood  
 Extrapyrarnidal disorder Extrasystoles Eye disorder  
 Eye irritation Eye movement disorder Eye pain Eye  
 swelling Face oedema Faecal incontinence Fatigue Feeling  
 abnormal Feeling cold Feeling drunk Feeling hot Feeling  
 jittery Feeling of body temperature change Flat affect Flatulence  
 Floppy infant Flushing Fungal infection Gait disturbance  
 Galactorrhoea Gangrene Gastric disorder Gastritis  
 Gastrointestinal disorder Gastrointestinal haemorrhage  
 Gastrointestinal pain Gingival pain Glossitis Glossodynia  
 Gout Grand mal convulsion Gynaecomastia Haematoma  
 Haematuria Haemoglobin Haemoglobin decreased Haemorrhage  
 Haemorrhage urinary tract Haemorrhoids Hallucination  
 Hangover Headache Hearing impaired Heart rate irregular  
 Hemiparesis Hepatic enzyme increased Hepatic failure  
 Hepatic function abnormal Hepatitis Hepatocellular injury  
 Hepatomegaly Herpes simplex Herpes virus infection  
 Hiccups Hirsutism Homicidal ideation Hordeolum  
 Hostility Hunger Hypercapnia Hyperhidrosis  
 Hyperkinesia Hyperprolactinaemia Hypersensitivity  
 Hypersomnia Hypertension Hypertonia Hyperventilation  
 Hypoaesthesia Hypochromic anaemia Hypokinesia Hypomania  
 Hyponatraemia Hypopnoea Hyporeflexia Hypotension  
 Hypothermia Hypotonia Hypoventilation Hypoxia Ill-defined  
 disorder Illusion Inappropriate antidiuretic hormone secretion  
 Incontinence Increased appetite Induration Infection  
 Infectious mononucleosis Infestation Inflammation  
 Influenza Injection site pain Injection site reaction  
 Insomnia Intraocular pressure increased Irritability  
 Jaundice Joint swelling Laryngitis Laryngospasm  
 Lethargy Leukocytosis Leukopenia Libido decreased  
 Libido increased Liver function test abnormal Liver injury  
 Local reaction Logorrhoea Loss of consciousness Loss of  
 libido Lung disorder Lymphadenopathy Major depression  
 Malaise Mania Mean arterial pressure Mediastinal disorder  
 Melaena Memory impairment Menstrual disorder  
 Menstruation irregular Mental disability Mental disorder  
 Mental retardation Micturition urgency Migraine  
 Miosis Mood swings Motion sickness Movement disorder  
 Muscle relaxant therapy Muscle rigidity Muscle spasms



Muscle spasticityMuscle twitching Muscular weakness  
 Musculoskeletal discomfort Musculoskeletal disorder  
 Musculoskeletal stiffness Myalgia Mydriasis Myoclonus  
 Nasal congestion Nasopharyngitis Nausea Neck pain  
 Necrosis Nervous system disorder Nervousness Neuritis  
 Neuroleptic malignant syndrome Neuropathy peripheral  
 Neutropenia Nightmare Nocturia Nodal rhythm Nodule  
 Nystagmus Obstruction Obstructive airways disorder Oedema  
 Oedema peripheral Oliguria Oropharyngeal pain Orthostatic  
 hypotension Osteoarthritis Otitis media Pain Pain in extremity  
 Pain in jaw Pallor Palpitations Pancytopenia  
 Paraesthesia Paraesthesia oral Paralysis Paresis  
 Pelvic pain Penile discharge Pericardial effusion Periorbital  
 oedema Personality disorder Phaeochromocytoma Pharyngitis  
 Phlebitis Photophobia Photosensitivity reaction  
 Pigmentation disorder Platelet count decreased Pleurisy  
 Pneumonia Pneumothorax Pollakiuria Polyuria Post-  
 traumatic stress disorder Precocious puberty Premenstrual  
 syndrome Presyncope Proctalgia Prothrombin level increased  
 Pruritus Psychomotor retardation Psychotic disorder  
 Puberty Pulmonary congestion Pulmonary function test  
 decreased Pulmonary haemorrhage Pulmonary hypertension Pulmonary  
 oedema Purpura Rash Rash maculo-papular Rectal  
 haemorrhage Rectal tenesmus Renal failure Respiratory arrest  
 Respiratory depression Respiratory disorder Respiratory  
 failure Respiratory moniliasis Respiratory rate decreased  
 Respiratory tract congestion Respiratory tract infection  
 Retching Retrograde amnesia Rhinitis allergic Rhinorrhoea  
 Rhonchi Salivary hypersecretion Scotoma Sedation  
 Sexual dysfunction Shock Sinus tachycardia Sinusitis Skin  
 burning sensation Skin discolouration Skin disorder Skin  
 exfoliation Skin necrosis Sleep apnoea syndrome Sleep disorder  
 Sleep talking Sluggishness Sneezing Somnambulism  
 Somnolence Speech disorder Stevens-Johnson syndrome  
 Stomatitis Strabismus Stridor Stupor Substance abuse  
 Suicidal ideation Swelling Swelling face Swollen tongue  
 Syncope Tachycardia Tachypnoea Tenderness Tendonitis  
 Tension Therapeutic response decreased Thinking abnormal  
 Thirst Thrombocytopenia Thrombocytosis Thrombophlebitis  
 Thrombosis Thyroid neoplasm Tinnitus Tongue coated  
 Tongue disorder Tongue oedema Tooth disorder Toothache  
 Toxic epidermal necrolysis Transaminases increased  
 Tremor Tropical spastic paresis Ulcer Upper airway  
 obstruction Upper respiratory tract infection Urethral disorder  
 Urinary hesitation Urinary incontinence Urinary retention  
 Urinary tract disorder Urinary tract infection Urine  
 colour abnormal Urine output increased Urticaria Vaginal discharge  
 Vaginal infection Vaginal inflammation Vascular purpura  
 Vasodilation procedure Venous thrombosis Ventricular arrhythmia  
 Ventricular extrasystoles Vertigo Viral infection  
 Vision blurred Visual acuity reduced Visual impairment  
 Vomiting Weight decreased Weight increased Wheezing  
 Withdrawal syndrome Xeroderma Xerophthalmia Yawning

\*\*\*\*\*  
 \*\*\*\*\*

Nuclear receptor coactivator 2 - Group: Other

Treated with:

genistein: experimental      small molecule      (0 associated side effects)

methyltrienolone: experimental      small molecule      (0 associated side effects)

17-methyl-17-alpha-dihydroequilenin:      experimental      small molecule      (0 associated side effects)

4-(2-amino-1-methyl-1h-imidazo[4,5-b]pyridin-6-yl)phenol: experimental      small molecule      (0 associated side effects)

n-(2,2,2-trifluoroethyl)-n-{4-[2,2,2-trifluoro-1-hydroxy-1-(trifluoromethyl)ethyl]phenyl}benzenesulfonamide: experimental      small molecule      (0 associated side effects)

4-[(1s,2s,5s)-5-(hydroxymethyl)-8-methyl-3-oxabicyclo[3.3.1]non-7-en-2-yl]phenol: experimental      small molecule      (0 associated side effects)

4-[(1s,2s,5s,9r)-5-(hydroxymethyl)-8,9-dimethyl-3-oxabicyclo[3.3.1]non-7-en-2-yl]phenol: experimental      small molecule      (0 associated side effects)

4-[(1s,2s,5s)-5-(hydroxymethyl)-6,8,9-trimethyl-3-oxabicyclo[3.3.1]non-7-en-2-yl]phenol: experimental      small molecule      (0 associated side effects)

(9alpha,13beta,17beta)-2-[(1z)-but-1-en-1-yl]estra-1,3,5(10)-triene-3,17-diol: experimental      small molecule      (0 associated side effects)

(9beta,11alpha,13alpha,14beta,17alpha)-11-(methoxymethyl)estra-1(10),2,4-triene-3,17-diol: experimental      small molecule      (0 associated side effects)

3-chloro-2-(4-hydroxyphenyl)-2h-indazol-5-ol: experimental      small molecule      (0 associated side effects)

3-ethyl-2-(4-hydroxyphenyl)-2h-indazol-5-ol: experimental      small molecule      (0 associated side effects)

2-chloro-5-nitro-n-phenylbenzamide:      experimental      small molecule      (0 associated side effects)

dimethyl (1r,4s)-5,6-bis(4-hydroxyphenyl)-7-oxabicyclo[2.2.1]hept-2,5-diene-2,3-dicarboxylate: experimental      small molecule      (0 associated side effects)

4-[1-allyl-7-(trifluoromethyl)-1h-indazol-3-yl]benzene-1,3-diol: experimental      small molecule      (0 associated side effects)

4-(6-hydroxy-1h-indazol-3-yl)benzene-1,3-diol:      experimental      small molecule      (0 associated side effects)

(2e,4e)-11-methoxy-3,7,11-trimethyldodeca-2,4-dienoic acid: experimental      small molecule      (0 associated side effects)

diethyl (1r,2s,3r,4s)-5,6-bis(4-hydroxyphenyl)-7-oxabicyclo[2.2.1]hept-5-ene-2,3-dicarboxylate: experimental      small molecule      (0 associated side effects)

2-amino-1-methyl-6-phenylimidazo[4,5-b]pyridine: experimental      small molecule      (0 associated side effects)

2-[(2,4-dichlorobenzoyl)amino]-5-(pyrimidin-2-yloxy)benzoic acid: experimental      small molecule      (0 associated side effects)

4-[(1s,2r,5s)-4,4,8-trimethyl-3-oxabicyclo[3.3.1]non-7-en-2-yl]phenol: experimental      small molecule      (0 associated side effects)

tributylstannanyl:      experimental      small molecule      (0 associated side effects)

raloxifene core: experimental small molecule (0 associated side effects)

known side effects mediated through drugs targeting this protein:

\*\*\*\*\*  
\*\*\*\*\*

Monocarboxylate transporter 3 - Group: Transporter

Treated with:

pyruvic acid: approved, nutraceutical small molecule (0 associated side effects) For nutritional supplementation, also for treating dietary shortage or imbalance

known side effects mediated through drugs targeting this protein:

\*\*\*\*\*  
\*\*\*\*\*

Cannabinoid receptor 2 - Group: Receptor

Treated with:

dronabinol: illicit, approved small molecule (0 associated side effects) For the treatment of anorexia associated with weight loss in patients with AIDS, and nausea and vomiting associated with cancer chemotherapy in patients who have failed to respond adequately to conventional antiemetic treatments

nabilone: approved small molecule (133 associated side effects) Used for the control of nausea and vomiting, caused by chemotherapeutic agents used in the treatment of cancer, in patients who have failed to respond adequately to conventional antiemetic treatments.

133 known side effects mediated through drugs targeting this protein:

Abdominal distension Abdominal pain Abnormal dreams Affect  
lability Agitation Akathisia Amblyopia Anaemia Anhidrosis  
Anxiety Apathy Aphthous stomatitis Arrhythmia  
Arthralgia Asthenia Ataxia Back pain Bacterial  
infection Blindness Body temperature increased Cerebrovascular  
accident Chest pain Chills Confusional state Constipation  
Convulsion Cough Decreased appetite Depersonalisation  
Depressed level of consciousness Dermatitis Diarrhoea  
Discomfort Disorientation Disturbance in attention  
Dizziness postural Dry eye Dry mouth Dry throat  
Dyspepsia Dysphoria Dyspnoea Dystonia Dysuria  
Emotional disorder Epistaxis Euphoric mood Eye  
disorder Eye irritation Eye swelling Eyelid disorder Face  
oedema Fatigue Feeling abnormal Flat affect Flushing  
Gastritis Gastrointestinal pain Hallucination Headache  
Hot flush Hyperhidrosis Hyperkinesia Hypersensitivity  
Hypertension Hypoaesthesia Hypotension Hypotonia Ill-  
defined disorder Illusion Increased appetite Infection  
Insomnia Irritability Leukopenia Loss of consciousness  
Malaise Memory impairment Menopausal symptoms Mental  
disability Mood swings Muscle relaxant therapy Muscle twitching  
Musculoskeletal discomfort Myalgia Mydriasis Nasal  
congestion Nasal dryness Neck pain Nervousness Neurosis

Oedema           Orthostatic hypotension           Pain   Palpitations  
Panic disorder   Panic reaction           Paraesthesia oralParanoia  
Pharyngitis Phobia           Photophobia Photosensitivity reaction  
Pollakiuria Pruritus           Psychotic disorder           Rash   Scotoma  
Sedation       Sensory loss           Shock Sinus headache       Sleep  
disorder       Somnolence Speech disorder       Stomatitis Stupor  
Swelling       Syncope           Tachycardia Tension       Thinking abnormal  
Thirst         Tinnitus       Tongue disorder   Tongue oedema  
Tremor         Ulcer Urinary retentionVertigo       Visual acuity  
reduced       Visual impairmentWheezing

\*\*\*\*\*  
\*\*\*\*\*

Voltage-dependent L-type calcium channel subunit beta-2 - Group:  
Channel

Treated with:

isradipine: approved   small molecule   (0 associated side effects)

For the management of mild to moderate essential hypertension.  
It may be used alone or concurrently with thiazide-type diuretics.

amlodipine: approved   small molecule   (136 associated side effects)  
For the treatment of hypertension and chronic stable angina.

nimodipine: approved   small molecule   (47 associated side effects)

For use as an adjunct to improve neurologic outcome following subarachnoid hemorrhage (SAH) from ruptured intracranial berry aneurysms by reducing the incidence and severity of ischemic deficits.

nisoldipine:   approved   small molecule   (161 associated side effects)  
For the treatment of hypertension. It may be used alone or in combination with other antihypertensive agents.

nicardipine:   approved   small molecule   (107 associated side effects)  
Used for the management of patients with chronic stable angina and for the treatment of hypertension.

magnesium sulfate:   approved   small molecule   (0 associated side effects)  
Used for immediate control of life-threatening convulsions in the treatment of severe toxemias (pre-eclampsia and eclampsia) of pregnancy and in the treatment of acute nephritis in children. Also indicated for replacement therapy in magnesium deficiency, especially in acute hypomagnesemia accompanied by signs of tetany similar to those of hypocalcemia. Also used in uterine tetany as a myometrial relaxant.

verapamil: approved   small molecule   (113 associated side effects)  
For the treatment of hypertension, angina, and cluster headache prophylaxis.

felodipine: approved   small molecule   (96 associated side effects)

For the treatment of mild to moderate essential hypertension.

nitrendipine:   approved   small molecule   (0 associated side effects)  
For the treatment of mild to moderate hypertension

nifedipine: approved   small molecule   (217 associated side effects)  
For the management of vasospastic angina, chronic stable angina, hypertension, and Raynaud's phenomenon. May be used as a first line agent for left ventricular hypertrophy and isolated systolic hypertension (long-acting agents).

mibefradil: withdrawn   small molecule   (0 associated side effects)

For the treatment of angina and high blood pressure.

nilvadipine: approved small molecule (0 associated side effects) For the management of vasospastic angina, chronic stable angina and hypertension.

367 known side effects mediated through drugs targeting this protein:

Abdominal discomfort Abdominal pain Abnormal dreams  
Accommodation disorder Acidosis Acne Acute coronary  
syndrome Acute generalised exanthematous pustulosis Affect  
lability Agitation Alanine aminotransferase increased Alopecia  
Amblyopia Amnesia Anaemia Anaphylactic shock  
Angina pectoris Angioedema Angiopathy Anxiety Anxiety  
disorder Apathy Arrhythmia Arteriosclerosis Arthralgia  
Arthritis Arthropathy Asthenia Asthma Ataxia  
Atrial fibrillation Atrioventricular block complete  
Atrioventricular block first degree Atrioventricular  
dissociation Back pain Balance disorder Bezoar Blepharitis  
Blindness Blindness transient Blister Blood alkaline  
phosphatase increased Blood lactate dehydrogenase increased Blood  
pressure increased Blood prolactin increased Blood urea  
increased Blood uric acid Body temperature increased Bradycardia  
Breast engorgement Breast pain Bronchitis Bronchospasm  
Cardiac arrest Cardiac disorder Cardiac failure congestive  
Cardiac fibrillation Cardiac murmur Cardiogenic shock  
Cardiomyopathy Cellulitis Cerebral ischaemia  
Cerebrovascular accident Chest discomfort Chest pain  
Chills Cholestasis Chronic obstructive pulmonary disease  
Cold sweat Colitis Coma Confusional state Conjunctivitis  
Constipation Convulsion Coombs direct test positive Cough  
Crocodile tears syndrome Decreased appetite Deep vein  
thrombosis Depersonalisation Depressive symptom Dermatitis  
Dermatitis bullous Dermatitis exfoliative Diabetes mellitus  
Diarrhoea Diplopia Discomfort Disease progression  
Disseminated intravascular coagulation Dissociation  
Disturbance in attention Disturbance in sexual arousal  
Dizziness postural Dry mouth Dry skin Dysgeusia  
Dyspepsia Dysphagia Dyspnoea Dysuria Ear disorder  
Ear infection Ear pain Ecchymosis Effusion  
Electrocardiogram ST segment Electrocardiogram ST segment  
depression Electrocardiogram T wave inversion Electrocardiogram  
abnormal Eosinophilia Epistaxis Erectile dysfunction  
Eructation Erythema Erythema multiforme Erythema nodosum  
Erythromelalgia Extrapyrarnidal disorder Extrasystoles  
Eye disorder Eye haemorrhage Eye pain Eye pruritus  
Face oedema Fasting Fatigue Feeling abnormal Feeling  
cold Feeling hot Feeling jittery Flat affect Flatulence Fluid  
retention Flushing Fungal skin infection Galactorrhoea  
Gamma-glutamyltransferase increased Gastritis  
Gastrointestinal disorder Gastrointestinal haemorrhage  
Gastrointestinal obstruction Gastrointestinal pain  
Gastrointestinal tract irritation Gastrooesophageal reflux  
disease Gingival bleeding Gingival disorder Gingival hyperplasia  
Glaucoma Glomerulonephritis membranous Glossitis Gout  
Gynaecomastia Haematoma Haematuria Haemoglobin Haemolysis  
Haemolytic anaemia Haemorrhage Haemorrhage intracranial

Headache Hepatic enzyme increased Hepatic function  
 abnormal Hepatitis Hepatitis cholestatic Hepatomegaly  
 Herpes simplex Herpes virus infection Herpes zoster Hot  
 flush Hyperaemia Hyperglycaemia Hyperhidrosis Hyperkeratosis  
 Hyperkinesia Hyperplasia Hyperprolactinaemia  
 Hypersensitivity Hypertension Hypertonia Hypertrophic  
 cardiomyopathy Hypertrophy Hypoaesthesia Hypokalaemia  
 Hyponatraemia Hypophosphataemia Hypotension Hypoxia Ileus  
 paralytic Ill-defined disorder Incontinence Increased  
 appetite Infarction Infection Inflammation Influenza  
 Injection site pain Injection site reaction Insomnia  
 Intermittent claudication Irritability Ischaemia  
 Jaundice Joint stiffness Joint swelling Keratitis  
 Laboratory test abnormal Lacrimation increased Laryngitis  
 Laryngospasm Lethargy Leukocytoclastic vasculitis  
 Leukopenia Libido decreased Liver function test abnormal Loss  
 of consciousness Lung disorder Lymphadenopathy Macule  
 Malaise Melaena Menopausal symptoms Menstrual  
 disorder Mental disability Metabolic acidosis Micturition  
 disorder Micturition urgency Migraine Mood swings Mouth  
 ulceration Muscle fatigue Muscle spasms Muscle twitching  
 Muscular weakness Musculoskeletal discomfort Musculoskeletal  
 stiffness Myalgia Myocardial infarction Myocardial ischaemia  
 Myositis Nasal congestion Nasopharyngitis Nausea Neck  
 pain Nephrolithiasis Nervousness Neuropathy peripheral Nightmare  
 Nocturia Nystagmus Obstruction Obstructive airways disorder  
 Oedema Oedema peripheral Oesophagitis Oligomenorrhoea  
 Oliguria Oropharyngeal discomfort Oropharyngeal pain  
 Orthostatic hypotension Osteoarthritis Otitis media  
 Pain Pain in extremity Palpitations Pancreatitis  
 Paraesthesia Paralysis Paranoia Parosmia Pelvic pain  
 Pericardial haemorrhage Pericarditis Periorbital  
 oedema Peripheral ischaemia Peripheral vascular disorder  
 Petechiae Pharyngitis Phlebitis Photosensitivity reaction  
 Platelet count decreased Pleural disorder Pleural effusion  
 Poisoning Pollakiuria Polyuria Pruritus Psychotic  
 disorder Pulmonary congestion Pulmonary oedema Purpura  
 Quadripareisis Rales Rash Rash erythematous Rash maculo-  
 papular Rash pustular Regurgitation Renal failure Renal  
 failure chronic Renal impairment Respiratory disorder Respiratory  
 failure Respiratory tract congestion Respiratory tract infection  
 Retinal detachment Rhinitis Rhinorrhoea Salivary gland  
 enlargement Sensory loss Sexual dysfunction Shock Sinus  
 arrest Sinus arrhythmia Sinusitis Skin discolouration Skin  
 ulcer Sleep disorder Sneezing Somnolence Sticky skin Stomatitis  
 Stridor Supraventricular tachycardia Syncope Tachycardia  
 Tenderness Tenosynovitis Tension Thinking abnormal  
 Thirst Thrombocytopenia Thrombophlebitis Thrombosis  
 Thyroiditis Tinnitus Toxic epidermal necrolysis Tremor  
 Ulcer Upper respiratory tract infection Urinary incontinence  
 Urine output increased Urogenital disorder Urticaria  
 Vaginal haemorrhage Vaginal infection Vaginal inflammation  
 Vascular purpura Vasculitis Vasodilation procedure Vasospasm  
 Venous insufficiency Venous thrombosis Ventricular arrhythmia  
 Ventricular extrasystoles Ventricular tachycardia

Vertigo Vision blurred Visual acuity reduced Visual  
impairment Vitreous floaters Vomiting Weight decreased Weight  
increased Wheezing Xerophthalmia  
\*\*\*\*\*  
\*\*\*\*\*

Voltage-dependent T-type calcium channel subunit alpha-1H - Group:  
Channel

Treated with:

isradipine: approved small molecule (0 associated side effects)

For the management of mild to moderate essential hypertension.  
It may be used alone or concurrently with thiazide-type diuretics.

cinnarizine: approved small molecule (0 associated side  
effects) For the treatment of vertigo/meniere's disease, nausea  
and vomiting, motion sickness and also useful for vestibular  
symptoms of other origins.

zonisamide: approved small molecule (190 associated side  
effects) For use as adjunctive treatment of partial seizures in  
adults with epilepsy.

felodipine: approved small molecule (96 associated side effects)  
For the treatment of mild to moderate essential hypertension.

nitrendipine: approved small molecule (0 associated side  
effects) For the treatment of mild to moderate hypertension

nifedipine: approved small molecule (217 associated side  
effects) For the management of vasospastic angina, chronic stable  
angina, hypertension, and Raynaud's phenomenon. May be used as a  
first line agent for left ventricular hypertrophy and isolated  
systolic hypertension (long-acting agents).

amiodarone: approved small molecule (192 associated side  
effects) Intravenously, for initiation of treatment and  
prophylaxis of frequently recurring ventricular fibrillation and  
hemodynamically unstable ventricular tachycardia in patients  
refractory to other therapy. Orally, for the treatment of life-  
threatening recurrent ventricular arrhythmias such as recurrent  
ventricular fibrillation and recurrent hemodynamically unstable  
ventricular tachycardia.

bepridil: approved small molecule (0 associated side effects)  
For the treatment of chronic stable angina (classic effort-  
associated angina).

mibefradil: withdrawn small molecule (0 associated side effects)  
For the treatment of angina and high blood pressure.

flunarizine: approved small molecule (0 associated side  
effects) Used in the prophylaxis of migraine, occlusive peripheral  
vascular disease, vertigo of central and peripheral origin, and as  
an adjuvant in the therapy of epilepsy.

418 known side effects mediated through drugs targeting this  
protein:

Abdominal discomfort Abdominal pain Abnormal dreams Acidosis  
Acne Acute coronary syndrome Acute generalised  
exanthematous pustulosis Acute interstitial pneumonitis Acute  
respiratory distress syndrome Affect lability Agitation  
Agranulocytosis Akinesia Alanine aminotransferase increased  
Albuminuria Alopecia Alveolitis fibrosing Amblyopia  
Amenorrhoea Amnesia Anaemia Anaphylactic shock  
Anaphylactoid reaction Angina pectoris Angioedema Anxiety

Anxiety disorder Aplastic anaemia Apnoea Arrhythmia  
 Arthralgia Arthritis Arthropathy Aspartate aminotransferase  
 increased Asthenia Ataxia Atrial fibrillation  
 Atrioventricular block Atrioventricular block second degree  
 Back pain Benign intracranial hypertension Bezoar  
 Bladder pain Blindness Blindness transient Blister  
 Blood lactate dehydrogenase increased Blood pressure  
 increased Blood uric acid Body temperature increased Bradycardia  
 Bradykinesia Breast engorgement Breast pain  
 Bronchiolitis Bronchitis Bronchospasm Bundle branch  
 block Bundle branch block left Calculus bladder Cardiac arrest  
 Cardiac disorder Cardiac failure Cardiac failure congestive  
 Cardiac fibrillation Cardiogenic shock Cellulitis  
 Cerebrovascular accident Chest pain Chills Cholangitis  
 Cholecystitis Cholelithiasis Cholestasis Cognitive  
 disorder Colitis Coma Conduction disorder Confusional state  
 Congenital cardiovascular anomaly Conjunctivitis  
 Constipation Convulsion Coombs direct test positive  
 Coordination abnormal Corneal degeneration Corneal deposits  
 Cough Crocodile tears syndrome Deafness Decreased  
 appetite Dehydration Delirium Demyelinating polyneuropathy  
 Depressed level of consciousness Dermatitis Dermatitis  
 bullous Dermatitis exfoliative Diarrhoea Diplopia Discomfort  
 Disorientation Dissociation Disturbance in attention  
 Disturbance in sexual arousal Dizziness Drug eruption  
 Dry eye Dry mouth Dry skin Duodenal ulcer Duodenitis  
 Dysarthria Dysgeusia Dyskinesia Dyspepsia Dysphagia  
 Dyspnoea Dystonia Dysuria Ecchymosis Eczema  
 Effusion Electrocardiogram QT prolonged Embolism  
 Encephalopathy Enuresis Eosinophilia Eosinophilic  
 pneumonia Epididymitis Epistaxis Erectile dysfunction  
 Eructation Erythema Erythema multiforme Erythema nodosum  
 Erythromelalgia Euphoric mood Extrasystoles Eye  
 disorder Eye haemorrhage Face oedema Faecal incontinence  
 Fasting Fatigue Feeling abnormal Feeling hot Feeling  
 jittery Fibrosis Flank pain Flatulence Flushing Foetor  
 hepaticus Gait disturbance Gamma-glutamyltransferase increased  
 Gastritis Gastroenteritis Gastrointestinal disorder  
 Gastrointestinal haemorrhage Gastrointestinal obstruction  
 Gastrointestinal pain Gastrointestinal tract irritation  
 Gastrooesophageal reflux disease Gingival bleeding Gingival  
 disorder Gingival hyperplasia Gingivitis Glaucoma  
 Glomerulonephritis membranous Glossitis Goitre Gout  
 Granuloma Gynaecomastia Haematemesis Haematuria  
 Haemoglobin Haemolysis Haemolytic anaemia Haemoptysis  
 Haemorrhage Hallucination Headache Hepatic cirrhosis  
 Hepatic enzyme increased Hepatic function abnormal  
 Hepatitis cholestatic Hepatocellular injury Hepatomegaly  
 Hirsutism Hot flush Hyperaemia Hyperaesthesia  
 Hyperglycaemia Hyperhidrosis Hyperkeratosis  
 Hyperkinesia Hyperplasia Hyperreflexia Hypersensitivity  
 Hypertension Hyperthyroidism Hypertonia Hypertrophy  
 Hypoaesthesia Hypoglycaemia Hypokinesia Hyponatraemia  
 Hypotension Hypothyroidism Hypotonia Hypoxia Idiopathic  
 pulmonary fibrosis Ill-defined disorder Immunodeficiency



Inappropriate antidiuretic hormone secretion Incontinence  
 Increased tendency to bruise Infarction Infection  
 Inflammation Influenza Injection site reaction  
 Insomnia Iritis Irritability Jaundice Jaundice  
 cholestatic Joint stiffness Laboratory test abnormal Lacrimation  
 increased Lens disorder Lenticular opacities Leukocytoclastic  
 vasculitis Leukopenia Libido decreased Liver disorder Liver  
 function test abnormal Loss of consciousness Lung disorder Lung  
 infiltration Lymphadenopathy Macular degeneration Malaise  
 Mass Mastitis Melaena Menopausal symptoms Menorrhagia  
 Menstrual disorder Mental disability Metabolic acidosis  
 Microcytic anaemia Micturition urgency Migraine Mood  
 swings Mouth ulceration Movement disorder Muscle relaxant  
 therapy Muscle rigidity Muscle spasms Muscle twitching  
 Muscular weakness Musculoskeletal discomfort Musculoskeletal  
 stiffness Myalgia Myocardial infarction Myocardial ischaemia  
 Myoclonus Myopathy Nasal congestion Nasopharyngitis  
 Nausea Neck pain Necrosis Neoplasm malignant  
 Nephrolithiasis Nervousness Neuritis Neuropathy peripheral  
 Notropenia Nightmare Nocturia Nodal arrhythmia Nodule  
 Nuchal rigidity Nystagmus Obliterative bronchiolitis  
 Obstruction Oculogyric crisis Oedema Oedema peripheral  
 Oesophagitis Oliguria Onycholysis Optic nerve disorder  
 Optic neuritis Organising pneumonia Oropharyngeal  
 discomfort Oropharyngeal pain Orthostatic hypotension  
 Osteoarthritis Pain Pain in extremity Palpitations  
 Pancreatitis Pancytopenia Papilloedema  
 Paraesthesia oral Paralysis Paranoia Parosmia Pelvic pain  
 Periorbital oedema Petechiae Pharyngitis Phlebitis  
 Photodermatitis Photophobia Photosensitivity reaction  
 Pigmentation disorder Pleural disorder Pleural effusion  
 Pleurisy Pneumonia Poisoning Pollakiuria Polyneuropathy  
 Polyserositis Polyuria Pruritus Psoriasis Psychotic  
 disorder Pulmonary congestion Pulmonary embolism Pulmonary  
 fibrosis Pulmonary oedema Pulmonary toxicity Pulse absent  
 Pulseless electrical activity Purpura Pustular  
 psoriasis Rales Rash Rash erythematous Rash maculo-papular Rash  
 pustular Rectal haemorrhage Regurgitation Renal failure  
 Renal failure acute Renal failure chronic Renal impairment  
 Respiratory disorder Respiratory tract congestion Respiratory  
 tract infection Rhabdomyolysis Rhinitis Rhinorrhoea Salivary  
 gland enlargement Salivary hypersecretion Scotoma Sexual  
 dysfunction Shock Sinus arrest Sinus bradycardia Sinusitis Skin  
 cancer Skin discolouration Skin disorder Skin exfoliation  
 Skin necrosis Sleep disorder Sneezing Somnolence  
 Speech disorder Stomatitis Stridor Syncope Systemic  
 lupus erythematosus Tachycardia Tenderness Tension Thirst  
 Thrombocytopenia Thrombophlebitis Thrombosis Thyroid cancer  
 Thyroid disorder Thyroid neoplasm Tinnitus Torsade de  
 pointes Toxic epidermal necrolysis Tremor Ulcer Upper  
 respiratory tract infection Urinary incontinence Urinary retention  
 Urine output increased Urogenital disorder Urticaria VIIth  
 nerve paralysis Vascular insufficiency Vascular purpura Vasculitis  
 Vasodilation procedure Venous thrombosis Ventricular arrhythmia  
 Ventricular extrasystoles Ventricular tachycardia

Vertigo Vision blurred Visual acuity reduced Visual impairment Vomiting Weight decreased Weight increased Wheezing  
\*\*\*\*\*  
\*\*\*\*\*

Toll-like receptor 4 - Group: Receptor

Treated with:

3-hydroxy-myristic acid: experimental small molecule (0 associated side effects)

known side effects mediated through drugs targeting this protein:

\*\*\*\*\*  
\*\*\*\*\*

Organic solute transporter subunit beta - Group: Transporter

Treated with:

conjugated estrogens: approved small molecule (219 associated side effects) For the treatment of moderate to severe vasomotor symptoms associated with the menopause, atrophic vaginitis, osteoporosis, hypoestrogenism due to hypogonadism, castration, primary ovarian failure, breast cancer (for palliation only), and Advanced androgen-dependent carcinoma of the prostate (for palliation only)

digoxin: approved small molecule (56 associated side effects)

For the treatment and management of congestive cardiac insufficiency, arrhythmias and heart failure.

dinoprostone: approved small molecule (0 associated side effects) For the termination of pregnancy during the second trimester (from the 12th through the 20th gestational week as calculated from the first day of the last normal menstrual period), as well as for evacuation of the uterine contents in the management of missed abortion or intrauterine fetal death up to 28 weeks of gestational age as calculated from the first day of the last normal menstrual period. Also used in the management of nonmetastatic gestational trophoblastic disease (benign hydatidiform mole). Other indications include improving the cervical inducibility (cervical "ripening") in pregnant women at or near term with a medical or obstetrical need for labor induction, and the management of postpartum hemorrhage.

taurocholic acid: experimental small molecule (0 associated side effects)

257 known side effects mediated through drugs targeting this protein:

5q minus syndrome Abdominal discomfort Abdominal distension  
Abdominal pain Abscess Acne Acute coronary syndrome  
Affect lability Agitation Alopecia Amenorrhoea  
Anaphylactic shock Anaphylactoid reaction Angioedema  
Angiopathy Anxiety Apathy Arrhythmia Arthralgia  
Arthropathy Asthenia Asthma Atrial tachycardia  
Atrioventricular block complete Atrioventricular block first degree  
Atrioventricular block second degree Atrioventricular dissociation  
Back pain Benign neoplasm Bladder pain  
Blindness Blood glucose decreased Blood glucose increased  
Blood pressure increased Blood triglycerides increased  
Body temperature increased Bone disorder Bone pain

Bradycardia Breast discharge Breast discomfort Breast disorder  
 Breast enlargement Breast mass Breast neoplasm Breast pain  
 Breast swelling Breast tenderness Bronchitis Candidiasis  
 Carbohydrate tolerance decreased Cardiac arrest Cardiac  
 disorder Cardioactive drug level Cerebrovascular accident  
 Cervical discharge Cervix disorder Chest pain Chills  
 Chloasma Chorea Colitis ischaemic Conduction disorder  
 Confusional state Conjunctivitis Connective tissue disorder  
 Constipation Coronary artery thrombosis Cough Cystitis  
 Cystitis noninfective Death Decreased appetite Deep vein  
 thrombosis Delirium Depression Dermatitis Diarrhoea Discomfort  
 Dissociation Dizziness Drug interaction Dry eye  
 Dysmenorrhoea Dyspepsia Dysplasia Dyspnoea Dysuria  
 Ear pain Ecchymosis Ectropion of cervix Electrocardiogram  
 PR prolongation Electrocardiogram ST segment Electrocardiogram ST  
 segment depression Electrocardiogram change Embolism  
 Embolism venous Endometrial cancer Endometrial  
 hypertrophy Endometriosis Epilepsy Erythema Erythema  
 multiforme Erythema nodosum Extrasystoles Eye disorder  
 Fatigue Feeling abnormal Fibrocystic breast disease Flat  
 affect Flatulence Fluid retention Galactorrhoea Gallbladder  
 disorder Gastrointestinal disorder Gastrointestinal necrosis  
 Gastrointestinal pain Generalised oedema Genital discharge  
 Glucose tolerance decreased Glucose tolerance impaired  
 Gynaecomastia Haemangioma Haemoptysis Haemorrhagic disorder  
 Hallucination Headache Hepatic function abnormal  
 Hepatobiliary disease Hirsutism Hypercalcaemia  
 Hyperglycaemia Hyperlipidaemia Hypernatraemia  
 Hypersensitivity Hypertension Hypertonia  
 Hypertriglyceridaemia Hypertrophy Hypoaesthesia  
 Hypocalcaemia Hypotension Hypothyroidism Infarction  
 Infection Influenza Injection site pain Insomnia  
 Intestinal ischaemia Irritability Ischaemia Jaundice  
 Jaundice cholestatic Lacrimal disorder Lacrimation increased  
 Laryngitis Leiomyoma Loss of consciousness Mass Meningioma  
 benign Menorrhagia Menstrual disorder Mental disorder  
 Mesenteric vascular insufficiency Metrorrhagia Migraine  
 Mood swings Mouth ulceration Muscle rigidity Muscle spasms  
 Musculoskeletal discomfort Musculoskeletal pain  
 Musculoskeletal stiffness Myalgia Myocardial infarction  
 Nausea Neck pain Necrosis Neoplasm Nervous system  
 disorder Nervousness Neuritis Neuropathy peripheral Nipple pain  
 Nodule Nuchal rigidity Oedema Oedema peripheral Optic  
 neuritis Osteoarthritis Ovarian cancer Pain in extremity  
 Palpitations Pancreatitis Paraesthesia Pelvic pain  
 Pharyngitis Phlebitis Pigmentation disorder Poisoning  
 Pollakiuria Porphyria Precocious puberty Pruritus genital  
 Psychotic disorder Puberty Pulmonary embolism  
 Pulmonary function test decreased Purpura Rash generalised  
 Rash maculo-papular Respiratory depression Respiratory tract  
 infection Rhinitis Sensory loss Shock Sinus bradycardia  
 Sinusitis Smear cervix abnormal Somnolence Stomatitis  
 Subcutaneous nodule Swelling Syncope Tachycardia  
 Tenderness Tension Thrombocytopenia Thrombophlebitis  
 superficial Thrombosis Tooth abscess Ulcer Upper respiratory

tract infection Urethral disorder Urinary tract disorder Urticaria  
Uterine cancer Uterine cervical erosion Uterine leiomyoma  
Uterine spasm Vaginal haemorrhage Varicose vein  
Vasodilation procedure Venous thrombosis Ventricular  
extrasystoles Ventricular fibrillation Ventricular  
tachycardia Vertigo Visual acuity reduced Visual impairment  
Vomiting Vulvovaginal candidiasis Vulvovaginal mycotic  
infection Vulvovaginal pruritus Weight increased Withdrawal bleed  
Xanthopsia

\*\*\*\*\*  
\*\*\*\*\*

Gamma-aminobutyric acid receptor subunit gamma-3 - Group: Channel  
Treated with:

lorazepam: approved small molecule (126 associated side effects) For the management of anxiety disorders, and for treatment of status epilepticus.

temazepam: approved small molecule (35 associated side effects) For the short-term treatment of insomnia (generally 7-10 days).

clobazam: illicit, approved small molecule (58 associated side effects) For treatment and management of epilepsy and anxiety disorder.

alprazolam: illicit, approved small molecule (178 associated side effects) For the management of anxiety disorder or the short-term relief of symptoms of anxiety and for the treatment of panic disorder, with or without agoraphobia.

chlordiazepoxide: illicit, approved small molecule (20 associated side effects) For the management of anxiety disorders or for the short-term relief of symptoms of anxiety, withdrawal symptoms of acute alcoholism, and preoperative apprehension and anxiety.

adinazolam: approved small molecule (0 associated side effects) For the treatment of anxiety and status epilepticus.

clorazepate: illicit, approved small molecule (0 associated side effects) For the management of anxiety disorders or for the short-term relief of the symptoms of anxiety. Also used as adjunctive therapy in the management of partial seizures and for the symptomatic relief of acute alcohol withdrawal.

midazolam: illicit, approved small molecule (119 associated side effects) For use as a sedative perioperatively.

flurazepam: illicit, approved small molecule (62 associated side effects) For short-term and intermittent use in patients with recurring insomnia and poor sleeping habits

halazepam: illicit, approved small molecule (0 associated side effects) Used to relieve anxiety, nervousness, and tension associated with anxiety disorders.

diazepam: illicit, approved small molecule (149 associated side effects) Used in the treatment of severe anxiety disorders, as a hypnotic in the short-term management of insomnia, as a sedative and premedicant, as an anticonvulsant, and in the management of alcohol withdrawal syndrome.

oxazepam: approved small molecule (36 associated side effects) For the treatment of anxiety disorders and alcohol withdrawal.

triazolam: illicit, approved, withdrawn small molecule (66 associated side effects) For the short-term treatment of insomnia.

clonazepam: illicit, approved small molecule (228 associated side effects) Used as an anticonvulsant in the treatment of the Lennox-Gastaut syndrome (petit mal variant), akinetic and myoclonic seizures.

estazolam: illicit, approved small molecule (131 associated side effects) For the short-term management of insomnia characterized by difficulty in falling asleep, frequent nocturnal awakenings, and/or early morning awakenings.

bromazepam: illicit, approved small molecule (47 associated side effects) For the short-term treatment of insomnia, short-term treatment of anxiety or panic attacks, if a benzodiazepine is required, and the alleviation of the symptoms of alcohol- and opiate-withdrawal.

clotiazepam: illicit, approved small molecule (0 associated side effects) For the treatment of anxiety disorders.

fludiazepam: illicit, approved small molecule (0 associated side effects) Used for the short-term treatment of anxiety disorders.

prazepam: illicit, approved small molecule (0 associated side effects) For the treatment of anxiety disorders.

quazepam: illicit, approved small molecule (0 associated side effects) Used to treat insomnia.

cinolazepam: approved small molecule (0 associated side effects) For the management of anxiety disorders or for the short-term relief of the symptoms of anxiety or anxiety associated with depressive symptoms.

nitrazepam: approved small molecule (44 associated side effects) Used to treat short-term sleeping problems (insomnia), such as difficulty falling asleep, frequent awakenings during the night, and early-morning awakening.

486 known side effects mediated through drugs targeting this protein:

Abdominal discomfort Abdominal distension Abdominal pain  
 Abnormal dreams Abnormal faeces Acidosis Acne Affect  
 lability Ageusia Aggression Agitation Agranulocytosis  
 Akathisia Akinesia Alcohol poisoning Alopecia Altered  
 state of consciousness Amblyopia Amnesia Anaemia  
 Anaphylactic shock Anaphylactoid reaction Anger Angioedema  
 Angiopathy Anorectal discomfort Anorectal disorder  
 Anterograde amnesia Anxiety Aortic dissection Apathy  
 Aphonia Apnoea Appetite disorder Arrhythmia Arterial  
 spasm Arthralgia Arthritis Aspartate aminotransferase increased  
 Aspiration Asthenia Asthma Ataxia Athetosis  
 Atrioventricular block Back pain Balance disorder Bladder  
 dysfunction Bladder pain Blindness Blood alkaline phosphatase  
 increased Blood bilirubin increased Blood disorder Blood  
 glucose decreased Blood thromboplastin decreased Body temperature  
 decreased Body temperature increased Borderline personality  
 disorder Bradycardia Bradyphrenia Brain oedema Breast  
 disorder Breast pain Breast swelling Bronchitis Bronchospasm  
 Candidiasis Carbon dioxide increased Cardiac arrest  
 Cardiac disorder Cardiac failure Cardio-respiratory arrest  
 Cardiovascular disorder Cellulitis Cerebellar syndrome  
 Chest discomfort Chest pain Chills Choking sensation

Chorea Chromaturia Clonic convulsion Clonus Clumsiness  
 Coagulopathy Cognitive disorder Coma Completed suicide  
 Confusional state Connective tissue disorder Constipation  
 Conversion disorder Convulsion Coordination abnormal Cough  
 Cyanosis Cystitis Cystitis noninfective Cytolytic  
 hepatitis Deafness Death Decreased appetite Dehydration  
 Delirium Delirium tremens Delusion Dependence  
 Depersonalisation Depressed level of consciousness Depressed  
 mood Depression Depressive symptom Derealisation Dermatitis  
 Dermatitis contact Dermatitis exfoliative Diarrhoea  
 Diplopia Discomfort Disinhibition Disorientation  
 Disturbance in attention Disturbance in sexual arousal  
 Dizziness Drooling Drug abuse Drug dependence Drug  
 eruption Drug intolerance Drug withdrawal convulsions Dry mouth  
 Dry skin Dysaesthesia Dysarthria Dysgeusia Dyskinesia  
 Dysmenorrhoea Dyspepsia Dysphagia Dysphonia Dysphoria  
 Dyspnoea Dysthymic disorder Dystonia Dysuria Ear  
 infection Ear pain Ecchymosis Effusion Ejaculation delayed  
 Ejaculation failure Emotional disorder Emotional  
 distress Emotional poverty Encephalopathy Encopresis Endometrial  
 sarcoma Energy increased Enterocolitis Enuresis  
 Eosinophilia Epilepsy Epistaxis Erectile dysfunction  
 Erythema Erythema multiforme Euphoric mood  
 Extrapyrarnidal disorder Extrasystoles Eye disorder  
 Eye irritation Eye movement disorder Eye pain Eye  
 swelling Face oedema Faecal incontinence Fatigue Feeling  
 abnormal Feeling cold Feeling drunk Feeling hot Feeling  
 jittery Feeling of body temperature change Flat affect Flatulence  
 Floppy infant Flushing Fungal infection Gait disturbance  
 Galactorrhoea Gangrene Gastric disorder Gastritis  
 Gastrointestinal disorder Gastrointestinal haemorrhage  
 Gastrointestinal pain Gingival pain Glossitis Glossodynia  
 Gout Grand mal convulsion Gynaecomastia Haematoma  
 Haematuria Haemoglobin Haemoglobin decreased Haemorrhage  
 Haemorrhage urinary tract Haemorrhoids Hallucination  
 Hangover Headache Hearing impaired Heart rate irregular  
 Hemiparesis Hepatic enzyme increased Hepatic failure  
 Hepatic function abnormal Hepatitis Hepatocellular injury  
 Hepatomegaly Herpes simplex Herpes virus infection  
 Hiccups Hirsutism Homicidal ideation Hordeolum  
 Hostility Hunger Hypercapnia Hyperhidrosis  
 Hyperkinesia Hyperprolactinaemia Hypersensitivity  
 Hypersomnia Hypertension Hypertonia Hyperventilation  
 Hypoaesthesia Hypochromic anaemia Hypokinesia Hypomania  
 Hyponatraemia Hypopnoea Hyporeflexia Hypotension  
 Hypothermia Hypotonia Hypoventilation Hypoxia Ill-defined  
 disorder Illusion Inappropriate antidiuretic hormone secretion  
 Incontinence Increased appetite Induration Infection  
 Infectious mononucleosis Infestation Inflammation  
 Influenza Injection site pain Injection site reaction  
 Insomnia Intraocular pressure increased Irritability  
 Jaundice Joint swelling Laryngitis Laryngospasm  
 Lethargy Leukocytosis Leukopenia Libido decreased  
 Libido increased Liver function test abnormal Liver injury  
 Local reaction Logorrhoea Loss of consciousness Loss of

libido Lung disorder Lymphadenopathy Major depression  
 Malaise Mania Mean arterial pressure Mediastinal disorder  
 Melaena Memory impairment Menstrual disorder  
 Menstruation irregular Mental disability Mental disorder  
 Mental retardation Micturition urgency Migraine  
 Miosis Mood swings Motion sickness Movement disorder  
 Muscle relaxant therapy Muscle rigidity Muscle spasms  
 Muscle spasticity Muscle twitching Muscular weakness  
 Musculoskeletal discomfort Musculoskeletal disorder  
 Musculoskeletal stiffness Myalgia Mydriasis Myoclonus  
 Nasal congestion Nasopharyngitis Nausea Neck pain  
 Necrosis Nervous system disorder Nervousness Neuritis  
 Neuroleptic malignant syndrome Neuropathy peripheral  
 Neutropenia Nightmare Nocturia Nodal rhythm Nodule  
 Nystagmus Obstruction Obstructive airways disorder Oedema  
 Oedema peripheral Oliguria Oropharyngeal pain Orthostatic  
 hypotension Osteoarthritis Otitis media Pain Pain in extremity  
 Pain in jaw Pallor Palpitations Pancytopenia  
 Paraesthesia Paraesthesia oral Paralysis Paresis  
 Pelvic pain Penile discharge Pericardial effusion Periorbital  
 oedema Personality disorder Phaeochromocytoma Pharyngitis  
 Phlebitis Photophobia Photosensitivity reaction  
 Pigmentation disorder Platelet count decreased Pleurisy  
 Pneumonia Pneumothorax Pollakiuria Polyuria Post-  
 traumatic stress disorder Precocious puberty Premenstrual  
 syndrome Presyncope Proctalgia Prothrombin level increased  
 Pruritus Psychomotor retardation Psychotic disorder  
 Puberty Pulmonary congestion Pulmonary function test  
 decreased Pulmonary haemorrhage Pulmonary hypertension Pulmonary  
 oedema Purpura Rash Rash maculo-papular Rectal  
 haemorrhage Rectal tenesmus Renal failure Respiratory arrest  
 Respiratory depression Respiratory disorder Respiratory  
 failure Respiratory moniliasis Respiratory rate decreased  
 Respiratory tract congestion Respiratory tract infection  
 Retching Retrograde amnesia Rhinitis allergic Rhinorrhoea  
 Rhonchi Salivary hypersecretion Scotoma Sedation  
 Sexual dysfunction Shock Sinus tachycardia Sinusitis Skin  
 burning sensation Skin discolouration Skin disorder Skin  
 exfoliation Skin necrosis Sleep apnoea syndrome Sleep disorder  
 Sleep talking Sluggishness Sneezing Somnambulism  
 Somnolence Speech disorder Stevens-Johnson syndrome  
 Stomatitis Strabismus Stridor Stupor Substance abuse  
 Suicidal ideation Swelling Swelling face Swollen tongue  
 Syncope Tachycardia Tachypnoea Tenderness Tendonitis  
 Tension Therapeutic response decreased Thinking abnormal  
 Thirst Thrombocytopenia Thrombocytosis Thrombophlebitis  
 Thrombosis Thyroid neoplasm Tinnitus Tongue coated  
 Tongue disorder Tongue oedema Tooth disorder Toothache  
 Toxic epidermal necrolysis Transaminases increased  
 Tremor Tropical spastic paresis Ulcer Upper airway  
 obstruction Upper respiratory tract infection Urethral disorder  
 Urinary hesitation Urinary incontinence Urinary retention  
 Urinary tract disorder Urinary tract infection Urine  
 colour abnormal Urine output increased Urticaria Vaginal discharge  
 Vaginal infection Vaginal inflammation Vascular purpura

Vasodilation procedure Venous thrombosis Ventricular arrhythmia  
Ventricular extrasystoles Vertigo Viral infection  
Vision blurred Visual acuity reduced Visual impairment  
Vomiting Weight decreased Weight increased Wheezing  
Withdrawal syndrome Xeroderma Xerophthalmia Yawning

\*\*\*\*\*  
\*\*\*\*\*

Schistosome Calcium (Ca 2+) Channel - Group: Channel

Treated with:

praziquantel: approved small molecule (39 associated side effects) For the treatment of infections due to all species of schistosoma.

39 known side effects mediated through drugs targeting this protein:

Abdominal discomfort Abdominal pain Arrhythmia Asthenia  
Atrioventricular block Body temperature increased Bradycardia  
Cardiac disorder Cardiac fibrillation Convulsion Death  
Decreased appetite Diarrhoea Diarrhoea haemorrhagic  
Discomfort Dizziness Eosinophilia Feeling abnormal  
Gastrointestinal disorder Gastrointestinal pain Headache  
Hypersensitivity Ill-defined disorder Immune system disorder  
Infestation Liver disorder Malaise Musculoskeletal  
discomfort Myalgia Nausea Nervous system disorder  
Obstruction Pain Polyserositis Somnolence Urticaria  
Ventricular fibrillation Vertigo Vomiting

\*\*\*\*\*  
\*\*\*\*\*

Gamma-aminobutyric acid receptor subunit delta - Group: Channel

Treated with:

lorazepam: approved small molecule (126 associated side effects) For the management of anxiety disorders, and for treatment of status epilepticus.

temazepam: approved small molecule (35 associated side effects) For the short-term treatment of insomnia (generally 7-10

days).

clobazam: illicit, approved small molecule (58 associated side effects) For treatment and management of epilepsy and anxiety disorder.

alprazolam: illicit, approved small molecule (178 associated side effects) For the management of anxiety disorder or the short-term relief of symptoms of anxiety and for the treatment of panic disorder, with or without agoraphobia.

chlordiazepoxide: illicit, approved small molecule (20 associated side effects) For the management of anxiety disorders or for the short-term relief of symptoms of anxiety, withdrawal symptoms of acute alcoholism, and preoperative apprehension and anxiety.

adinazolam: approved small molecule (0 associated side effects) For the treatment of anxiety and status epilepticus.

clorazepate: illicit, approved small molecule (0 associated side effects) For the management of anxiety disorders or for the short-term relief of the symptoms of anxiety. Also used as adjunctive therapy in the management of partial seizures and for the symptomatic relief of acute alcohol withdrawal.

midazolam: illicit, approved small molecule (119 associated side effects) For use as a sedative perioperatively.



flurazepam: illicit, approved small molecule (62 associated side effects) For short-term and intermittent use in patients with recurring insomnia and poor sleeping habits

halazepam: illicit, approved small molecule (0 associated side effects) Used to relieve anxiety, nervousness, and tension associated with anxiety disorders.

diazepam: illicit, approved small molecule (149 associated side effects) Used in the treatment of severe anxiety disorders, as a hypnotic in the short-term management of insomnia, as a sedative and premedicant, as an anticonvulsant, and in the management of alcohol withdrawal syndrome.

oxazepam: approved small molecule (36 associated side effects) For the treatment of anxiety disorders and alcohol withdrawal.

triazolam: illicit, approved, withdrawn small molecule (66 associated side effects) For the short-term treatment of insomnia.

clonazepam: illicit, approved small molecule (228 associated side effects) Used as an anticonvulsant in the treatment of the Lennox-Gastaut syndrome (petit mal variant), akinetic and myoclonic seizures.

estazolam: illicit, approved small molecule (131 associated side effects) For the short-term management of insomnia characterized by difficulty in falling asleep, frequent nocturnal awakenings, and/or early morning awakenings.

bromazepam: illicit, approved small molecule (47 associated side effects) For the short-term treatment of insomnia, short-term treatment of anxiety or panic attacks, if a benzodiazepine is required, and the alleviation of the symptoms of alcohol- and opiate-withdrawal.

clotiazepam: illicit, approved small molecule (0 associated side effects) For the treatment of anxiety disorders.

fludiazepam: illicit, approved small molecule (0 associated side effects) Used for the short-term treatment of anxiety disorders.

ketazolam: approved small molecule (0 associated side effects) Ketazolam could be used for the treatment of anxiety. In approved countries, it is indicated for the treatment of anxiety, tension, irritability and similar stress related symptoms.

prazepam: illicit, approved small molecule (0 associated side effects) For the treatment of anxiety disorders.

quazepam: illicit, approved small molecule (0 associated side effects) Used to treat insomnia.

cinolazepam: approved small molecule (0 associated side effects) For the management of anxiety disorders or for the short-term relief of the symptoms of anxiety or anxiety associated with depressive symptoms.

nitrazepam: approved small molecule (44 associated side effects) Used to treat short-term sleeping problems (insomnia), such as difficulty falling asleep, frequent awakenings during the night, and early-morning awakening.

486 known side effects mediated through drugs targeting this protein:

|                      |                      |                |
|----------------------|----------------------|----------------|
| Abdominal discomfort | Abdominal distension | Abdominal pain |
| Abnormal dreams      | Abnormal faeces      | Acidosis       |
|                      | Acne                 | Affect         |

lability Ageusia Aggression Agitation Agranulocytosis  
 Akathisia Akinesia Alcohol poisoning Alopecia Altered  
 state of consciousness Amblyopia Amnesia Anaemia  
 Anaphylactic shock Anaphylactoid reaction Anger Angioedema  
 Angiopathy Anorectal discomfort Anorectal disorder  
 Anterograde amnesia Anxiety Aortic dissection Apathy  
 Aphonia Apnoea Appetite disorder Arrhythmia Arterial  
 spasm Arthralgia Arthritis Aspartate aminotransferase increased  
 Aspiration Asthenia Asthma Ataxia Athetosis  
 Atrioventricular block Back pain Balance disorder Bladder  
 dysfunction Bladder pain Blindness Blood alkaline phosphatase  
 increased Blood bilirubin increased Blood disorder Blood  
 glucose decreased Blood thromboplastin decreased Body temperature  
 decreased Body temperature increased Borderline personality  
 disorder Bradycardia Bradyphrenia Brain oedema Breast  
 disorder Breast pain Breast swelling Bronchitis Bronchospasm  
 Candidiasis Carbon dioxide increased Cardiac arrest  
 Cardiac disorder Cardiac failure Cardio-respiratory arrest  
 Cardiovascular disorder Cellulitis Cerebellar syndrome  
 Chest discomfort Chest pain Chills Choking sensation  
 Chorea Chromaturia Clonic convulsion Clonus Clumsiness  
 Coagulopathy Cognitive disorder Coma Completed suicide  
 Confusional state Connective tissue disorder Constipation  
 Conversion disorder Convulsion Coordination abnormal Cough  
 Cyanosis Cystitis Cystitis noninfective Cytolytic  
 hepatitis Deafness Death Decreased appetite Dehydration  
 Delirium Delirium tremens Delusion Dependence  
 Depersonalisation Depressed level of consciousness Depressed  
 mood Depression Depressive symptom Derealisation Dermatitis  
 Dermatitis contact Dermatitis exfoliative Diarrhoea  
 Diplopia Discomfort Disinhibition Disorientation  
 Disturbance in attention Disturbance in sexual arousal  
 Dizziness Drooling Drug abuse Drug dependence Drug  
 eruption Drug intolerance Drug withdrawal convulsions Dry mouth  
 Dry skin Dysaesthesia Dysarthria Dysgeusia Dyskinesia  
 Dysmenorrhoea Dyspepsia Dysphagia Dysphonia Dysphoria  
 Dyspnoea Dysthymic disorder Dystonia Dysuria Ear  
 infection Ear pain Ecchymosis Effusion Ejaculation delayed  
 Ejaculation failure Emotional disorder Emotional  
 distress Emotional poverty Encephalopathy Encopresis Endometrial  
 sarcoma Energy increased Enterocolitis Enuresis  
 Eosinophilia Epilepsy Epistaxis Erectile dysfunction  
 Erythema Erythema multiforme Euphoric mood  
 Extrapiramidal disorder Extrasystoles Eye disorder  
 Eye irritation Eye movement disorder Eye pain Eye  
 swelling Face oedema Faecal incontinence Fatigue Feeling  
 abnormal Feeling cold Feeling drunk Feeling hot Feeling  
 jittery Feeling of body temperature change Flat affect Flatulence  
 Floppy infant Flushing Fungal infection Gait disturbance  
 Galactorrhoea Gangrene Gastric disorder Gastritis  
 Gastrointestinal disorder Gastrointestinal haemorrhage  
 Gastrointestinal pain Gingival pain Glossitis Glossodynia  
 Gout Grand mal convulsion Gynaecomastia Haematoma  
 Haematuria Haemoglobin Haemoglobin decreased Haemorrhage  
 Haemorrhage urinary tract Haemorrhoids Hallucination

Hangover    Headache    Hearing impaired    Heart rate irregular  
 Hemiparesis    Hepatic enzyme increased    Hepatic failure  
 Hepatic function abnormal    Hepatitis    Hepatocellular injury  
 Hepatomegaly    Herpes simplex    Herpes virus infection  
 Hiccups    Hirsutism    Homicidal ideation    Hordeolum  
 Hostility    Hunger    Hypercapnia    Hyperhidrosis  
 Hyperkinesia    Hyperprolactinaemia    Hypersensitivity  
 Hypersomnia    Hypertension    Hypertonia    Hyperventilation  
 Hypoaesthesia    Hypochromic anaemia    Hypokinesia    Hypomania  
 Hyponatraemia    Hypopnoea    Hyporeflexia    Hypotension  
 Hypothermia    Hypotonia    Hypoventilation    Hypoxia    Ill-defined  
 disorder    Illusion    Inappropriate antidiuretic hormone secretion  
 Incontinence    Increased appetite    Induration    Infection  
 Infectious mononucleosis    Infestation    Inflammation  
 Influenza    Injection site pain    Injection site reaction  
 Insomnia    Intraocular pressure increased    Irritability  
 Jaundice    Joint swelling    Laryngitis    Laryngospasm  
 Lethargy    Leukocytosis    Leukopenia    Libido decreased  
 Libido increased    Liver function test abnormal    Liver injury  
 Local reaction    Logorrhoea    Loss of consciousness    Loss of  
 libido    Lung disorder    Lymphadenopathy    Major depression  
 Malaise    Mania    Mean arterial pressure    Mediastinal disorder  
 Melaena    Memory impairment    Menstrual disorder  
 Menstruation irregular    Mental disability    Mental disorder  
 Mental retardation    Micturition urgency    Migraine  
 Miosis    Mood swings    Motion sickness    Movement disorder  
 Muscle relaxant therapy    Muscle rigidity    Muscle spasms  
 Muscle spasticity    Muscle twitching    Muscular weakness  
 Musculoskeletal discomfort    Musculoskeletal disorder  
 Musculoskeletal stiffness    Myalgia    Mydriasis    Myoclonus  
 Nasal congestion    Nasopharyngitis    Nausea    Neck pain  
 Necrosis    Nervous system disorder    Nervousness    Neuritis  
 Neuroleptic malignant syndrome    Neuropathy peripheral  
 Neutropenia    Nightmare    Nocturia    Nodal rhythm    Nodule  
 Nystagmus    Obstruction    Obstructive airways disorder    Oedema  
 Oedema peripheral    Oliguria    Oropharyngeal pain    Orthostatic  
 hypotension    Osteoarthritis    Otitis media    Pain    Pain in extremity  
 Pain in jaw    Pallor    Palpitations    Pancytopenia  
 Paraesthesia    Paraesthesia oral    Paralysis    Paresis  
 Pelvic pain    Penile discharge    Pericardial effusion    Periorbital  
 oedema    Personality disorder    Phaeochromocytoma    Pharyngitis  
 Phlebitis    Photophobia    Photosensitivity reaction  
 Pigmentation disorder    Platelet count decreased    Pleurisy  
 Pneumonia    Pneumothorax    Pollakiuria    Polyuria    Post-  
 traumatic stress disorder    Precocious puberty    Premenstrual  
 syndrome    Presyncope    Proctalgia    Prothrombin level increased  
 Pruritus    Psychomotor retardation    Psychotic disorder  
 Puberty    Pulmonary congestion    Pulmonary function test  
 decreased    Pulmonary haemorrhage    Pulmonary hypertension    Pulmonary  
 oedema    Purpura    Rash    Rash maculo-papular    Rectal  
 haemorrhage    Rectal tenesmus    Renal failure    Respiratory arrest  
 Respiratory depression    Respiratory disorder    Respiratory  
 failure    Respiratory moniliasis    Respiratory rate decreased  
 Respiratory tract congestion    Respiratory tract infection  
 Retching    Retrograde amnesia    Rhinitis allergic    Rhinorrhoea

Rhonchi Salivary hypersecretion Scotoma Sedation  
 Sexual dysfunction Shock Sinus tachycardia Sinusitis Skin  
 burning sensation Skin discolouration Skin disorder Skin  
 exfoliation Skin necrosis Sleep apnoea syndrome Sleep disorder  
 Sleep talking Sluggishness Sneezing Somnambulism  
 Somnolence Speech disorder Stevens-Johnson syndrome  
 Stomatitis Strabismus Stridor Stupor Substance abuse  
 Suicidal ideation Swelling Swelling face Swollen tongue  
 Syncope Tachycardia Tachypnoea Tenderness Tendonitis  
 Tension Therapeutic response decreased Thinking abnormal  
 Thirst Thrombocytopenia Thrombocytosis Thrombophlebitis  
 Thrombosis Thyroid neoplasm Tinnitus Tongue coated  
 Tongue disorder Tongue oedema Tooth disorder Toothache  
 Toxic epidermal necrolysis Transaminases increased  
 Tremor Tropical spastic paresis Ulcer Upper airway  
 obstruction Upper respiratory tract infection Urethral disorder  
 Urinary hesitation Urinary incontinence Urinary retention  
 Urinary tract disorder Urinary tract infection Urine  
 colour abnormal Urine output increased Urticaria Vaginal discharge  
 Vaginal infection Vaginal inflammation Vascular purpura  
 Vasodilation procedure Venous thrombosis Ventricular arrhythmia  
 Ventricular extrasystoles Vertigo Viral infection  
 Vision blurred Visual acuity reduced Visual impairment  
 Vomiting Weight decreased Weight increased Wheezing  
 Withdrawal syndrome Xeroderma Xerophthalmia Yawning

\*\*\*\*\*  
 \*\*\*\*\*

Retinoic acid receptor RXR-alpha - Group: Receptor

Treated with:

adapalene: approved small molecule (35 associated side effects)

For the topical treatment of comedo, papular and pustular acne (acne vulgaris) of the face, chest or back.

bexarotene: approved small molecule (153 associated side effects) Used orally for the treatment of skin manifestations of cutaneous T-cell lymphoma (CTCL) in patients who are refractory to at least one prior systemic therapy. Also used topically for the treatment of skin lesions in early (stage IA and IB) CTCL in patients who experience refractory or persistent disease with the use of other therapies or are intolerant of other therapies.

acitretin: approved small molecule (165 associated side effects) For the treatment of severe psoriasis in adults.

alitretinoin: approved small molecule (0 associated side effects) For topical treatment of cutaneous lesions in patients with AIDS-related Kaposi's sarcoma.

etodolac: approved small molecule (167 associated side effects) For acute and long-term management of signs and symptoms of osteoarthritis and rheumatoid arthritis, as well as for the management of pain.

etretinate: withdrawn small molecule (0 associated side effects) For the treatment of severe psoriasis in adults.

(5beta)-pregnane-3,20-dione: experimental small molecule (0 associated side effects)

2-chloro-5-nitro-n-phenylbenzamide: experimental small molecule (0 associated side effects)

1-benzyl-3-(4-methoxyphenylamino)-4-phenylpyrrole-2,5-dione:  
 experimental small molecule (0 associated side effects)  
 2-[(2,4-dichlorobenzoyl)amino]-5-(pyrimidin-2-yl)oxy)benzoic acid:  
 experimental small molecule (0 associated side effects)  
 tributylstannanyl: experimental small molecule (0  
 associated side effects)

336 known side effects mediated through drugs targeting this  
 protein:

Abdominal discomfort Abdominal distension Abdominal infection  
 Abdominal pain Abdominal pain upper Abnormal faeces Acne  
 Acute coronary syndrome Ageusia Agitation  
 Agranulocytosis Alanine aminotransferase increased Albuminuria  
 Alcohol intolerance Alopecia Anaemia Anaphylactic  
 shock Anaphylactoid reaction Angina pectoris Angioedema Anorectal  
 discomfort Anorectal disorder Anxiety Aplastic anaemia  
 Arrhythmia Arthralgia Arthritis Arthropathy Aspartate  
 aminotransferase increased Asthenia Asthma Ataxia Atopy  
 Atrophy Back pain Bacterial infection Balanoposthitis  
 Benign intracranial hypertension Bladder pain Bleeding  
 time prolonged Blepharitis Blood amylase increased Blood  
 creatinine increased Blood lactate dehydrogenase increased Blood  
 triglycerides increased Blood urea increased Blood uric acid  
 increased Body temperature increased Bone pain Breast pain  
 Bronchitis Bronchospasm Burning sensation Bursitis  
 Calcinosis Candidiasis Cardiac failure Cardiac failure  
 congestive Cataract Cataract subcapsular Cellulitis  
 Cerebrovascular accident Cerumen impaction Chapped lips  
 Cheilitis Chest pain Chills Coagulation time prolonged  
 Cold sweat Colitis Coma Confusional state Congenital eye  
 disorder Conjunctivitis Constipation Convulsion Corneal  
 lesion Corneal neovascularisation Cough Crocodile tears  
 syndrome Cutaneous vasculitis Cystitis Cystitis noninfective  
 Deafness Death Decreased appetite Dermatitis atopic  
 Dermatitis bullous Dermatitis contact Dermatitis  
 exfoliative Diarrhoea Discomfort Dizziness Dry eye Dry mouth  
 Dry skin Duodenitis Dysgeusia Dyspepsia Dysphonia  
 Dyspnoea Dysuria Ear infection Ear pain Ecchymosis  
 Eczema Effusion Eosinophilia Epidermal necrosis  
 Epistaxis Erectile dysfunction Eructation Erythema  
 Erythema multiforme Exostosis Eye disorder Eye  
 irritation Eye pain Eyelid oedema Face oedema Fasting  
 Fatigue Febrile neutropenia Feeling abnormal Flatulence  
 Flushing Foetal disorder Gait disturbance Gastric ulcer  
 Gastritis Gastroenteritis Gastrointestinal haemorrhage  
 Gastrointestinal pain Genital discharge Gingival bleeding  
 Gingivitis Glossitis Granuloma Haematemesi Haematoma  
 Haematuria Haemoglobin Haemolytic anaemia Haemoptysis  
 Haemorrhage Hair texture abnormal Hallucination Headache  
 Hearing impaired Hepatic enzyme increased Hepatic failure  
 Hepatic necrosis Hepatitis Hepatitis cholestatic Herpes  
 simplex Herpes virus infection High density lipoprotein decreased  
 Hordeolum Hot flush Hyperaesthesia Hyperbilirubinaemia  
 Hypercholesterolaemia Hyperglycaemia Hyperhidrosis  
 Hyperkalaemia Hyperlipidaemia Hypernatraemia

Hypersensitivity Hypertension Hypertonia  
 Hypertriglyceridaemia Hypertrophy Hypervitaminosis  
 Hypervitaminosis A Hypoaesthesia Hypocalcaemia  
 Hypochromic anaemia Hyponatraemia Hypoproteinaemia  
 Hypotension Hypothyroidism Hypoxia Ill-defined disorder  
 Impaired healing Incontinence Increased appetite  
 Infarction Infection Inflammation Influenza Insomnia  
 Interstitial lung disease Intestinal ulcer Iritis  
 Irritability Jaundice Jaundice cholestatic Keratitis  
 Lacrimation decreased Lacrimation increased Laryngitis  
 Lethargy Leukocytoclastic vasculitis Leukopenia Lip dry  
 Lip swelling Liver function test abnormal Loss of  
 consciousness Lung infiltration Lymphadenopathy Lymphocytosis  
 Madarosis Malaise Mass Melaena Meningitis Menopausal  
 symptoms Micturition urgency Mouth ulceration Muscle spasms  
 Muscular weakness Musculoskeletal discomfort Myalgia  
 Myocardial infarction Nasal dryness Nausea Necrosis  
 Nephritis Nephrolithiasis Nervousness Neuropathy peripheral  
 Neutropenia Nodule Oedema Oedema peripheral Oesophageal  
 achalasia Oesophagitis Oliguria Optic neuritis  
 Osteoarthritis Otitis externa Pain Palpitations  
 Pancreatic disorder Pancreatitis acute Pancytopenia  
 Papilloedema Paraesthesia Peptic ulcer Pharyngitis  
 Photophobia Photosensitivity reaction Pleural disorder  
 Pleural effusion Pneumonia Pollakiuria Polyuria Proctalgia  
 Protein urine present Proteinuria Pruritus Pulmonary  
 function test decreased Pulmonary oedema Purpura Pyogenic  
 granuloma Rash Rash maculo-papular Rash papular Rash  
 pustular Rash vesicular Rectal haemorrhage Rectal tenesmus  
 Renal failure Renal impairment Renal papillary necrosis  
 Respiratory depression Retinal haemorrhage Rhinitis Right  
 ventricular failure Saliva altered Salivary hypersecretion  
 Scab Scotoma Seborrhoeic dermatitis Sepsis Shock  
 Sinusitis Skin atrophy Skin discolouration Skin  
 disorder Skin exfoliation Skin fissures Skin hyperpigmentation  
 Skin hypertrophy Skin irritation Skin mass Skin oedema Skin  
 ulcer Somnolence Sticky skin Stomatitis Subdural haematoma  
 Swelling Syncope Tachycardia Tension Thirst  
 Thrombocytopenia Thrombocytosis Tinnitus Tongue ulceration  
 Toxic epidermal necrolysis Tremor Tubulointerstitial  
 nephritis Type 2 diabetes mellitus Ulcer Urinary incontinence  
 Urinary tract infection Urine abnormality Urine analysis  
 abnormal Urine output increased Urticaria Uterine haemorrhage  
 Vascular purpura Vasculitis Vertigo Vision blurred  
 Visual acuity reduced Visual impairment Vomiting  
 Vulvovaginitis Weight decreased Weight increased White blood  
 cell count decreased White blood cell disorder Xerophthalmia

\*\*\*\*\*  
 \*\*\*\*\*

Fibroblast growth factor receptor 2 - Group: Enzyme

Treated with:

palifermin: approved biotech (0 associated side effects) For  
 treatment of oral mucositis associated with chemotherapy and  
 radiation therapy.

thalidomide: approved,withdrawn small molecule (339 associated side effects) For the acute treatment of the cutaneous manifestations of moderate to severe erythema nodosum leprosum (ENL). Also for use as maintenance therapy for prevention and suppression of the cutaneous manifestations of ENL recurrence.

su4984: experimental small molecule (0 associated side effects)

4-[4-(1-amino-1-methylethyl)phenyl]-5-chloro-n-[4-(2-morpholin-4-ylethyl)phenyl]pyrimidin-2-amine: experimental small molecule (0 associated side effects)

338 known side effects mediated through drugs targeting this protein:

Abdominal discomfort Abdominal distension Abdominal pain Acne  
 Acute coronary syndrome Acute leukaemia Affect lability  
 Agitation Agranulocytosis Alanine aminotransferase increased  
 Albuminuria Alopecia Amblyopia Amenorrhoea Amnesia  
 Amyloidosis Anaemia Anaemia macrocytic Anaemia  
 megaloblastic Angina pectoris Angioedema Angiopathy Anxiety  
 Aphthous stomatitis Aplastic anaemia Apnoea Arrhythmia  
 Arterial thrombosis Arthralgia Arthritis Arthropathy  
 Ascites Aspartate aminotransferase increased Asthenia  
 Ataxia Atrial fibrillation Back pain Benign neoplasm  
 of skin Bladder pain Blood alkaline phosphatase increased  
 Blood creatinine decreased Blood creatinine increased Blood  
 glucose decreased Blood glucose increased Blood lactate  
 dehydrogenase increased Blood phosphorus decreased Blood  
 pressure increased Blood urea increased Blood uric acid  
 increased Body temperature increased Bone disorder Bone pain  
 Bradycardia Breast discomfort Breast swelling Bronchitis  
 Burning sensation Candidiasis Cardiac arrest Cardiac failure  
 Cardiac failure congestive Cardiac fibrillation Cell death  
 Cellulitis Cerebral ischaemia Cerebrovascular accident  
 Chills Chloasma Cholangitis Cholestasis Chronic myeloid  
 leukaemia Colitis Completed suicide Complex regional pain  
 syndrome Confusional state Conjunctivitis Constipation  
 Convulsion Coordination abnormal Coronary artery thrombosis  
 Cough Cyanosis Cystitis Cystitis noninfective Deafness  
 Death Decreased appetite Deep vein thrombosis Dehydration  
 Dementia Demyelination Depressed level of consciousness  
 Depression Dermatitis Dermatitis bullous Dermatitis  
 exfoliative Diabetes mellitus Diarrhoea Diplopia Disability  
 Discomfort Disease progression Disturbance in sexual  
 arousal Dizziness Dry eye Dry mouth Dry skin  
 Dyaesthesia Dysgeusia Dyskinesia Dysmenorrhoea  
 Dyspareunia Dyspepsia Dysphagia Dysphonia Dysuria  
 Eczema Effusion Electrolyte imbalance Emphysema  
 Endocrine disorder Endometriosis Enuresis  
 Eosinophilia Epistaxis Erectile dysfunction Eructation  
 Erythema multiforme Erythroleukaemia Euphoric mood Eye  
 disorder Eye pain Face oedema Fatigue Febrile neutropenia  
 Feeling abnormal Flatulence Fluid retention Flushing  
 Fungal skin infection Gait disturbance Galactorrhoea  
 Gallbladder disorder Gastric disorder Gastric ulcer  
 Gastroenteritis Gastrointestinal disorder Gastrointestinal

haemorrhage Gastrointestinal pain Gingival disorder Glossitis  
 Glucose tolerance decreased Grand mal convulsion  
 Gynaecomastia Haematuria Haemoptysis Hangover Headache  
 Hepatic function abnormal Hepatitis Hepatomegaly  
 Hernia Herpes simplex Herpes virus infection Hirsutism  
 Hormone level abnormal Hostility Hyperaesthesia  
 Hyperbilirubinaemia Hypercalcaemia Hypercholesterolaemia  
 Hyperglycaemia Hyperhidrosis Hyperkalaemia  
 Hyperkinesia Hyperlipidaemia Hypernatraemia  
 Hypertension Hypertonia Hypertrophy Hyperuricaemia  
 Hypoaesthesia Hypocalcaemia Hypochromic anaemia  
 Hypoglycaemia Hypokalaemia Hypomagnesaemia  
 Hyponatraemia Hypoproteinaemia Hyporeflexia  
 Hypothyroidism Hypovitaminosis Ichthyosis acquired Ill-  
 defined disorder Inappropriate antidiuretic hormone secretion  
 Increased appetite Infarction Infection Influenza  
 Insomnia Intestinal obstruction Intestinal perforation  
 Irritability Ischaemia Jaundice Jaundice cholestatic  
 Lacrimal disorder Lacrimation increased Lethargy Leukaemia  
 Leukocytosis Leukopenia Libido decreased Limb reduction  
 defect Lipase increased Liver function test abnormal Loss of  
 consciousness Lung disorder Lymphocytosis Lymphoedema  
 Lymphopenia Malaise Mean cell volume Meningitis Mental  
 disability Metrorrhagia Microcytic anaemia Migraine Mood  
 swings Multiple congenital abnormalities Muscle rigidity  
 Muscle spasms Muscular weakness Musculoskeletal discomfort  
 Musculoskeletal pain Musculoskeletal stiffness Myalgia  
 Myeloid leukaemia Myocardial infarction Myxoedema Nail  
 disorder Nausea Neck pain Necrosis Neoplasm Neoplasm  
 skin Nervous system disorder Nervousness Neuralgia Nuchal  
 rigidity Nystagmus Obstruction Oedema peripheral Oesophagitis  
 Oliguria Optic neuritis Oral candidiasis Orchitis  
 noninfective Osteoarthritis Pain in extremity Palpitations  
 Pancreatitis Pancytopenia Paraesthesia oral Parotid  
 gland enlargement Pericarditis Periodontitis Peripheral  
 sensory neuropathy Peripheral vascular disorder Peroneal nerve  
 palsy Petechiae Pharyngitis Photosensitivity reaction Pleural  
 disorder Pleural effusion Pneumocystis jiroveci pneumonia  
 Pneumonia Pollakiuria Protein urine present Proteinuria  
 Pruritus Psoriasis Psychotic disorder Pulmonary oedema  
 Purpura Pyuria Rales Rash Rash pustular Raynaud's  
 phenomenon Renal failure acute Respiratory tract infection  
 Retinitis Rhinitis Sarcoma Seborrhoeic dermatitis  
 Sepsis Shock Sick sinus syndrome Sinus bradycardia  
 Sinusitis Skin discolouration Skin disorder Skin  
 exfoliation Skin necrosis Skin ulcer Spleen palpable Stomatitis  
 Stupor Suicide attempt Syncope Tachycardia Tenderness  
 Tension Thinking abnormal Thrombocytopenia Tinnitus  
 Tongue discolouration Tooth disorder Toothache Toxic  
 epidermal necrolysis Tremor Tumour lysis syndrome Ulcer Upper  
 respiratory tract infection Urticaria Uterine cervical erosion  
 Vaginal haemorrhage Varicose vein Vascular purpura  
 Vasodilation procedure Vertigo Viral infection Visual  
 impairment Vomiting Vulvovaginal pruritus Weight decreased  
 Weight increased



\*\*\*\*\*  
\*\*\*\*\*

Acetylcholine receptor subunit beta - Group: Channel

Treated with:

galantamine: approved small molecule (160 associated side effects) For the treatment of mild to moderate dementia of the Alzheimer's type. Has also been investigated in patients with mild cognitive impairment who did not meet the diagnostic criteria for Alzheimer's disease.

160 known side effects mediated through drugs targeting this protein:

Abdominal discomfort Abdominal pain Aggression Agitation  
Anaemia Anxiety Apathy Aphasia Apraxia  
Arrhythmia Arrhythmia supraventricular Arthralgia Arthritis  
Asthenia Ataxia Atrial fibrillation Atrioventricular  
block Back pain Bladder pain Blood alkaline phosphatase  
increased Blood urea increased Body temperature increased Bone  
pain Bradycardia Bronchitis Bundle branch block Cardiac failure  
Cardiac fibrillation Cardiovascular disorder Cataract  
Cerebrovascular accident Cerebrovascular disorder Chest  
pain Coagulopathy Completed suicide Confusional state  
Constipation Convulsion Cough Cystitis Cystitis  
noninfective Decreased appetite Dehydration Delirium  
Depression Dermatitis Diarrhoea Discomfort Disturbance in  
sexual arousal Diverticulitis Dizziness Dry mouth Dysgeusia  
Dyspepsia Dysphagia Electrocardiogram QT prolonged  
Electrocardiogram T wave inversion Epistaxis Eye disorder  
Fatigue Feeling abnormal Flat affect Flatulence Gastric  
disorder Gastritis Gastroenteritis Gastrointestinal haemorrhage  
Gastrointestinal pain Gravitational oedema Haematuria  
Haemoglobin Haemorrhage Hallucination Headache Hepatic  
enzyme increased Hepatitis Hepatobiliary disease Hiccups  
Hyperglycaemia Hyperkinesia Hypersensitivity Hypersomnia  
Hypertension Hypertonia Hypokalaemia Hypokinesia  
Hypotension Ill-defined disorder Immune system disorder  
Incontinence Infarction Infection Insomnia Ischaemia  
Lethargy Libido increased Liver disorder Loss of  
consciousness Lower gastrointestinal haemorrhage Malaise  
Melaena Mental disorder Muscle contractions involuntary  
Muscle spasms Musculoskeletal discomfort Musculoskeletal  
disorder Myalgia Myocardial ischaemia Nausea  
Nephrolithiasis Nervous system disorder Nervousness  
Neuropathy peripheral Nightmare Nocturia Oedema  
Oedema peripheral Oesophageal disorder Oesophageal  
perforation Orthostatic hypotension Pain in extremity  
Palpitations Paraesthesia Paranoia Pneumonia  
Pollakiuria Purpura Rash Rectal haemorrhage Renal  
failure Respiratory disorder Respiratory tract infection  
Rhinitis Salivary hypersecretion Shock Somnolence  
Suicidal ideation Suicide attempt Supraventricular tachycardia  
Syncope Tachycardia Tension Thrombocytopenia  
Thrombocytosis Tinnitus Transient ischaemic attack  
Tremor Upper respiratory tract infection Urethral disorder  
Urinary incontinence Urinary retention Urinary tract disorder

Urinary tract infection      Vascular dementiaVascular purpura  
Ventricular tachycardia      Vertigo      Vision blurred  
Vomiting      Weight decreased

\*\*\*\*\*  
\*\*\*\*\*

Nuclear receptor ROR-alpha - Group: Receptor

Treated with:

cholesterol-sulfate:    experimental      small molecule      (0  
associated side effects)

known side effects mediated through drugs targeting this protein:

\*\*\*\*\*  
\*\*\*\*\*

Choline transporter-like protein 3 - Group: Transporter

Treated with:

choline:    approved,nutraceutical small molecule      (0 associated  
side effects)      For nutritional supplementation, also for treating  
dietary shortage or imbalance

known side effects mediated through drugs targeting this protein:

\*\*\*\*\*  
\*\*\*\*\*

Outer membrane protein A precursor - Group: Other

Treated with:

(hydroxyethyloxy)tri(ethyloxy)octane:    experimental      small  
molecule      (0 associated side effects)

known side effects mediated through drugs targeting this protein:

\*\*\*\*\*  
\*\*\*\*\*

FL cytokine receptor - Group: Enzyme

Treated with:

sorafenib: approved      small molecule      (130 associated side  
effects)      For the treatment of patients with advanced renal cell  
carcinoma.

sunitinib: approved      small molecule      (198 associated side  
effects)      For the treatment of advanced renal cell carcinoma as  
well as the treatment of gastrointestinal stromal tumor after  
disease progression on or intolerance to imatinib mesylate.

251 known side effects mediated through drugs targeting this  
protein:

Abdominal discomfort    Abdominal pain    Abdominal pain upper    Acne  
Acute coronary syndrome      Adrenal insufficiency    Ageusia  
Alanine aminotransferase increased    Alopecia    Anaemia  
Angioedema    Angiopathy    Aortic dissection    Aphthous stomatitis  
Apoptosis    Arrhythmia    Arthralgia    Ascites    Aspartate  
aminotransferase increased    Asthenia    Back pain    Blindness  
Blindness cortical      Blister      Blood albumin decreased  
Blood alkaline phosphatase increased      Blood amylase  
increased    Blood bilirubin increased      Blood creatinine increased  
Blood glucose decreased      Blood glucose increased      Blood

magnesium decreased    Blood phosphorus decreased    Blood potassium  
 decreased    Blood potassium increased    Blood sodium increased    Blood  
 thyroid stimulating hormone increased    Blood uric acid increased  
 Body temperature increased    Bradycardia    Breast disorder  
 Cardiac disorder    Cardiac failure    Cardiac failure congestive  
 Cell death    Cerebral haemorrhage    Cerebral infarction  
 Cerebrovascular accident    Chest pain    Chills    Cholangitis  
 Cholecystitis    Completed suicide    Congenital skin disorder  
 Connective tissue disorder    Constipation    Convulsion    Cough  
 Decreased appetite    Deep vein thrombosis    Dehydration  
 Depressed mood    Dermatitis    Dermatitis bullous    Dermatitis  
 exfoliative    Dermatitis psoriasiform    Diarrhoea    Discomfort  
 Dizziness    Dry mouth    Dry skin    Dysgeusia    Dyspepsia  
 Dysphagia    Dysphonia    Dyspnoea    Eczema    Effusion  
 Ejection fraction    Ejection fraction decreased    Electrocardiogram  
 PR interval    Embolism    Embolism venous    Endocrine disorder  
 Epistaxis    Erectile dysfunction    Erythema    Erythema  
 multiforme    Eye disorder    Fatigue    Febrile neutropenia  
 Fistula    Flank pain    Flatulence    Flushing    Folliculitis  
 Gastric haemorrhage    Gastritis    Gastrointestinal disorder  
 Gastrointestinal pain    Gastroesophageal reflux disease  
 Gingival pain    Gingivitis    Glossitis    Glossodynia  
 Gynaecomastia    Haematemesis    Haematochezia    Haematoma  
 Haemoglobin decreased    Haemoptysis    Haemorrhage    Haemorrhoids  
 Hair colour changes    Headache    Hepatic failure    Hepatic  
 function abnormal    Hepatic neoplasm malignant    Hepatobiliary disease  
 Hormone level abnormal    Hypercalcaemia    Hyperglycaemia  
 Hyperkalaemia    Hypernatraemia    Hypersensitivity  
 Hypertension    Hypertensive crisis    Hyperthyroidism  
 Hyperuricaemia    Hypoalbuminaemia    Hypocalcaemia    Hypogeusia  
 Hypoglycaemia    Hypokalaemia    Hyponatraemia  
 Hypophosphataemia    Hypothyroidism    Immune system disorder  
 Infarction    Infection    Infestation    Inflammation    Influenza  
 Influenza like illness    Insomnia    Ischaemia    Jaundice  
 Keratoacanthoma    Lacrimation increased    Left ventricular  
 dysfunction    Leukoderma    Leukoencephalopathy    Leukopenia    Lipase  
 increased    Loss of consciousness    Lung neoplasm malignant  
 Lymphopenia    Malaise    Mediastinal disorder    Melaena  
 Mental disorder    Metastasis    Metastatic renal cell carcinoma  
 Metrorrhagia    Microangiopathy    Mood swings    Mouth ulceration  
 Mucosal dryness    Mucosal inflammation    Musculoskeletal  
 discomfort    Myalgia    Myocardial ischaemia    Myopathy  
 Nasopharyngitis    Nausea    Necrosis    Neoplasm malignant  
 Nephritis    Nephrotic syndrome    Nervous system disorder  
 Neuropathy peripheral    Neutropenia    Oedema    Oedema peripheral  
 Oesophageal disorder    Oesophagitis    Oral pain    Pain    Pain  
 in extremity    Palmar-plantar erythrodysesthesia syndrome  
 Pancreatic disorder    Pancreatitis    Periorbital oedema  
 Peripheral sensory neuropathy    Platelet count decreased  
 Pleural disorder    Pleural effusion    Posterior reversible  
 encephalopathy syndrome    Primary hypothyroidism    Protein urine  
 present    Proteinuria    Prurigo    Pruritus    Pulmonary embolism  
 Pulmonary haemorrhage    Rash    Rash erythematous    Rash follicular  
 Rash papular    Reflux oesophagitis    Regressive behaviour  
 Renal failure    Renal failure acute    Renal impairment

Respiratory tract infection Rhabdomyolysis Rhinorrhoea Shock  
 Skin cancer Skin discolouration Skin exfoliation Social  
 avoidant behaviour Splinter haemorrhages Squamous cell  
 carcinoma Stomatitis Syncope Thrombocytopenia Thrombosis  
 Thrombotic microangiopathy Thyroid disorder Thyroiditis  
 Tinnitus Tongue ulceration Transient ischaemic attack  
 Tubulointerstitial nephritis Tumour lysis syndrome Tumour  
 necrosis Tumour pain Ulcer Upper respiratory tract infection  
 Urticaria Varices oesophageal Varicose vein Venous  
 thrombosis Ventricular dysfunction Visual acuity reduced  
 Visual impairment Vomiting Weight decreased Wound haemorrhage  
 Yellow skin

\*\*\*\*\*  
 \*\*\*\*\*

Neuronal acetylcholine receptor subunit alpha-5 - Group: Channel

Treated with:

nicotine: approved small molecule (98 associated side effects)

For the relief of nicotine withdrawal symptoms and as an aid to smoking cessation.

galantamine: approved small molecule (160 associated side effects) For the treatment of mild to moderate dementia of the Alzheimer's type. Has also been investigated in patients with mild cognitive impairment who did not meet the diagnostic criteria for Alzheimer's disease.

213 known side effects mediated through drugs targeting this protein:

Abdominal discomfort Abdominal pain Acne Affect lability  
 Aggression Agitation Amnesia Anaemia Anxiety  
 Apathy Aphasia Apraxia Arrhythmia Arrhythmia  
 supraventricular Arthralgia Arthritis Asthenia Ataxia  
 Atrial fibrillation Atrioventricular block Back pain  
 Bladder pain Blindness Blister Blood alkaline  
 phosphatase increased Blood urea increased Body temperature  
 increased Bone pain Bradycardia Bronchitis Bronchospasm  
 Bundle branch block Cardiac failure Cardiac fibrillation  
 Cardiovascular disorder Cataract Cerebrovascular  
 accident Cerebrovascular disorder Chest discomfort Chest pain  
 Coagulopathy Completed suicide Confusional state  
 Constipation Convulsion Coordination abnormal Cough  
 Cystitis Cystitis noninfective Decreased appetite  
 Dehydration Delirium Dependence Depression Dermatitis  
 Dermatitis bullous Diarrhoea Discomfort Disturbance in  
 attention Disturbance in sexual arousal Diverticulitis  
 Dizziness Drug abuse Drug dependence Dry mouth Dysgeusia  
 Dysmenorrhoea Dyspepsia Dysphagia Dysphonia Dyspnoea  
 Ear pain Electrocardiogram QT prolonged Electrocardiogram  
 T wave inversion Epistaxis Eye disorder Eye irritation  
 Fatigue Feeling abnormal Flat affect Flatulence Flushing  
 Gastric disorder Gastritis Gastroenteritis Gastrointestinal  
 haemorrhage Gastrointestinal pain Gravitational oedema Haematuria  
 Haemoglobin Haemorrhage Hallucination Headache Hepatic  
 enzyme increased Hepatitis Hepatobiliary disease Hiccups  
 Hyperglycaemia Hyperhidrosis Hyperkinesia  
 Hypersensitivity Hypersomnia Hypertension Hypertonia

Hypoaesthesia Hypokalaemia Hypokinesia Hypotension Ill-  
 defined disorder Immune system disorder Incontinence Increased  
 appetite Increased bronchial secretion Infarction Infection  
 Influenza Insomnia Irritability Ischaemia Lacrimation  
 increased Lethargy Libido increased Liver disorder Loss of  
 consciousness Lower gastrointestinal haemorrhage Malaise  
 Melaena Menstrual disorder Mental disability Mental  
 disorder Migraine Mood swings Muscle contractions involuntary  
 Muscle spasms Musculoskeletal discomfort Musculoskeletal  
 disorder Myalgia Myocardial ischaemia Nasal congestion Nasal  
 discomfort Nasal ulcer Nasopharyngitis Nausea Nephrolithiasis  
 Nervous system disorder Nervousness Neuropathy peripheral  
 Nightmare Nocturia Oedema Oedema peripheral Oesophageal  
 disorder Oesophageal perforation Orthostatic hypotension  
 Pain Pain in extremity Pain in jaw Palpitations  
 Paraesthesia Paranoia Pharyngitis Pneumonia Pollakiuria  
 Pruritus Purpura Rash Rectal haemorrhage Renal  
 failure Respiratory disorder Respiratory tract infection  
 Rhinitis Rhinorrhoea Salivary hypersecretion Sensory  
 loss Shock Sinusitis Sleep disorder Sneezing Somnolence  
 Sputum increased Stomatitis Suicidal ideation Suicide attempt  
 Supraventricular tachycardia Syncope Tachycardia Tension  
 Throat irritation Thrombocytopenia Thrombocytosis Tinnitus  
 Tobacco user Tooth disorder Transient ischaemic attack  
 Tremor Ulcer Upper respiratory tract infection Urethral  
 disorder Urinary incontinence Urinary retention Urinary tract  
 disorder Urinary tract infection Vascular dementia Vascular  
 purpura Ventricular tachycardia Vertigo Vision blurred  
 Visual acuity reduced Visual impairment Vomiting Weight  
 decreased Weight increased Withdrawal syndrome

\*\*\*\*\*  
 \*\*\*\*\*

Ryanodine receptor 1 - Group: Channel

Treated with:

caffeine: approved small molecule (32 associated side effects)

For management of fatigue, orthostatic hypotension, and for the short term treatment of apnea of prematurity in infants.

dantrolene: approved small molecule (91 associated side effects)

For use, along with appropriate supportive measures, for the management of the fulminant hypermetabolism of skeletal muscle characteristic of malignant hyperthermia crises in patients of all ages. Also used preoperatively, and sometimes postoperatively, to prevent or attenuate the development of clinical and laboratory signs of malignant hyperthermia in individuals judged to be malignant hyperthermia susceptible.

suramin: approved small molecule (0 associated side effects)

For treatment of human sleeping sickness, onchocerciasis and other diseases caused by trypanosomes and worms.

114 known side effects mediated through drugs targeting this protein:

Abdominal discomfort Abdominal pain Acidosis Acne Agitation  
 Anaemia Anaphylactic shock Aplastic anaemia Asphyxia  
 Asthenia Back pain Blood creatinine increased Blood  
 sodium increased Body temperature increased Cardiac failure

Cerebral haemorrhage Cerebrovascular accident Chills  
 Choking sensation Chronic lymphocytic leukaemia  
 Coagulopathy Confusional state Constipation Convulsion  
 Crystal urine Crystalluria Death Decreased appetite  
 Depression Dermatitis Diarrhoea Diplopia Discomfort  
 Disseminated intravascular coagulation Dizziness Drooling  
 Dry skin Dysgeusia Dysphagia Dyspnoea Effusion  
 Enterocolitis Eosinophilia Erythema Extravasation  
 Fatigue Feeling abnormal Feeling jittery Gastritis  
 Gastrointestinal haemorrhage Gastrointestinal pain Haematuria  
 Haemoglobin Haemorrhage Hair growth abnormal Headache  
 Hepatic failure Hepatitis Hyperglycaemia Hyperhidrosis  
 Hypersensitivity Hypoglycaemia Ill-defined disorder  
 Impaired healing Incontinence Injection site reaction  
 Insomnia Intestinal obstruction Irritability Lacrimation  
 increased Leukopenia Lymphoma Malaise Muscle spasms  
 Musculoskeletal discomfort Myalgia Nausea Necrosis  
 Necrotising colitis Necrotising enterocolitis neonatal  
 Nervousness Neuroleptic malignant syndrome Nocturia  
 Obstruction Oedema Pain Pericarditis Phlebitis  
 Pleural disorder Pleural effusion Pollakiuria Pruritus  
 Pulmonary function test decreased Pulmonary oedema Rash Renal  
 failure Respiratory depression Retinal disorder Retinopathy of  
 prematurity Sepsis Skin disorder Social avoidant behaviour  
 Somnolence Speech disorder Swelling Tachycardia Tension  
 Thrombocytopenia Thrombophlebitis Urinary incontinence  
 Urinary retention Urticaria Visual impairment Vomiting

\*\*\*\*\*  
 \*\*\*\*\*

Glutamate [NMDA] receptor subunit zeta-1 - Group: Channel

Treated with:

l-glutamic acid: approved, nutraceutical small molecule (0 associated side effects) Considered to be nature's "Brain food" by improving mental capacities; helps speed the healing of ulcers; gives a "lift" from fatigue; helps control alcoholism, schizophrenia and the craving for sugar.

meperidine: approved small molecule (50 associated side effects) Used to control moderate to severe pain.

orphenadrine: approved small molecule (28 associated side effects) Indicated for the treatment of Parkinson's disease.

dcka, 5,7-dichlorokynurenic acid: experimental small molecule (0 associated side effects)

d-serine: experimental small molecule (0 associated side effects)

cycloleucine: experimental small molecule (0 associated side effects)

60 known side effects mediated through drugs targeting this protein:

Abdominal discomfort Abdominal distension Affect lability  
 Agitation Anaemia Anaphylactic shock Aplastic anaemia  
 Asthenia Bradycardia Cardiac arrest Confusional state  
 Constipation Convulsion Coordination abnormal Delirium  
 Dermatitis Disorientation Dizziness Dry mouth Dyskinesia  
 Dysphoria Euphoric mood Feeling abnormal Flushing  
 Hallucination Headache Hyperhidrosis Hypersensitivity

Hypotension Induration Injection site pain Loss of  
consciousness Mood swings Muscle spasms Muscle twitching  
Mydriasis Myoclonus Nausea Palpitations Paralysis  
Phlebitis Pruritus Pulmonary function test decreased Rash  
Respiratory arrest Respiratory depression Sedation Shock  
Skin disorder Somnolence Syncope Tachycardia Tension  
Tremor Urinary hesitation Urinary retention Urticaria  
Vision blurred Visual impairment Vomiting

\*\*\*\*\*  
\*\*\*\*\*

Urea Transporter 1 - Group: Transporter

Treated with:

urea: experimental small molecule (2 associated side effects)

1 known side effects mediated through drugs targeting this protein:

Pruritus

\*\*\*\*\*  
\*\*\*\*\*

Outer membrane protein C - Group: Channel

Treated with:

dodecane: experimental small molecule (0 associated side effects)

known side effects mediated through drugs targeting this protein:

\*\*\*\*\*  
\*\*\*\*\*

Nuclear receptor coactivator 5 - Group: Other

Treated with:

(16alpha,17alpha)-estra-1,3,5(10)-triene-3,16,17-triol:  
experimental small molecule (0 associated side effects)

known side effects mediated through drugs targeting this protein:

\*\*\*\*\*  
\*\*\*\*\*

Glutamate receptor, ionotropic kainate 3 - Group: Channel

Treated with:

l-glutamic acid: approved, nutraceutical small molecule (0 associated side effects) Considered to be nature's "Brain food" by improving mental capacities; helps speed the healing of ulcers; gives a "lift" from fatigue; helps control alcoholism, schizophrenia and the craving for sugar.

known side effects mediated through drugs targeting this protein:

\*\*\*\*\*  
\*\*\*\*\*

5-hydroxytryptamine 1B receptor - Group: Receptor

Treated with:

eletriptan: approved small molecule (242 associated side effects) For the acute treatment of migraine with or without aura in adults.

ziprasidone: approved small molecule (251 associated side effects) For the treatment of schizophrenia and related psychotic disorders.

cabergoline: approved small molecule (96 associated side effects) For the treatment of hyperprolactinemic disorders, either idiopathic or due to prolactinoma (prolactin-secreting adenomas). May also be used to manage symptoms of Parkinsonian Syndrome as monotherapy during initial symptomatic management or as an adjunct to levodopa therapy during advanced stages of disease.

ropinirole: approved small molecule (631 associated side effects) For the treatment of the signs and symptoms of idiopathic Parkinson's disease. Also used for the treatment of restless legs syndrome.

zolmitriptan: approved small molecule (241 associated side effects) For the acute treatment of adult migraine with or without auras.

dihydroergotamine: approved small molecule (128 associated side effects) For the acute treatment of migraine headaches with or without aura and the acute treatment of cluster headache episodes.

olanzapine: approved small molecule (393 associated side effects) For the acute and maintenance treatment of schizophrenia and related psychotic disorders, as well as acute treatment of manic or mixed episodes of bipolar 1 disorder. Intramuscular olanzapine is indicated for the rapid control of agitated patients.

clozapine: approved small molecule (228 associated side effects) For use in patients with treatment-resistant schizophrenia.

pramipexole: approved small molecule (620 associated side effects) For the treatment of signs and symptoms of idiopathic Parkinson's disease

propranolol: approved small molecule (96 associated side effects) For the prophylaxis of migraine.

lisuride: approved small molecule (0 associated side effects) For the management of Parkinson's Disease

sumatriptan: approved small molecule (317 associated side effects) For the treatment of migraine attacks with or without aura.

apomorphine: approved small molecule (45 associated side effects) For the acute, intermittent treatment of hypomobility, off episodes (end-of-dose wearing off and unpredictable on/off episodes) associated with advanced Parkinson's disease.

ondansetron: approved small molecule (122 associated side effects) For the prevention of nausea and vomiting associated with emetogenic cancer chemotherapy, postoperation, and radiation. Also used for the treatment of postoperative nausea and vomiting.

almotriptan: approved small molecule (135 associated side effects) For the treatment of acute migraine headache in adults

naratriptan: approved small molecule (185 associated side effects) For the acute treatment of migraine attacks with or without aura in adults.

rizatriptan: approved small molecule (170 associated side effects) For treatment of acute migraine attacks with or without aura.



pindolol: approved small molecule (95 associated side effects)  
For the management of hypertension, edema, ventricular tachycardias, and atrial fibrillation.

frovatriptan: approved small molecule (148 associated side effects)  
For the acute treatment of migraine attacks with or without aura in adults.

pergolide: approved, withdrawn small molecule (354 associated side effects)  
Indicated as adjunctive treatment to levodopa/carbidopa in the management of the signs and symptoms of Parkinson's disease. It was withdrawn from the US and Canadian markets in 2007 due to an increased risk of cardiac valvulopathy.

bromocriptine: approved small molecule (120 associated side effects)  
For the treatment of galactorrhea due to hyperprolactinemia, prolactin-dependent menstrual disorders and infertility, prolactin-secreting adenomas, prolactin-dependent male hypogonadism, as adjunct therapy to surgery or radiotherapy for acromegaly or as monotherapy in special cases, as monotherapy in early Parkinsonian Syndrome or as an adjunct with levodopa in advanced cases with motor complications. Bromocriptine has also been used off-label to treat restless legs syndrome and neuroleptic malignant syndrome.

quetiapine: approved small molecule (359 associated side effects)  
For the treatment of schizophrenia and related psychotic disorders.

aripiprazole: approved small molecule (630 associated side effects)  
For the treatment of schizophrenia and related psychotic disorders.

yohimbine: approved small molecule (0 associated side effects)  
Indicated as a sympatholytic and mydriatic. Impotence has been successfully treated with yohimbine in male patients with vascular or diabetic origins and psychogenic origins.

bopindolol: approved small molecule (0 associated side effects)  
For the management of hypertension, edema, ventricular tachycardias, and atrial fibrillation.

1292 known side effects mediated through drugs targeting this protein:

|        |                     |                      |                      |                    |                |                      |                      |                      |                    |                 |                 |                      |         |                        |          |      |                   |               |                         |                             |                             |                 |                   |                |                |          |                  |                 |         |            |           |             |                 |           |          |                                    |                    |             |                     |           |          |                                |                 |           |             |         |         |                    |                       |                    |                        |          |       |                 |                 |            |                |            |                        |                      |                    |            |
|--------|---------------------|----------------------|----------------------|--------------------|----------------|----------------------|----------------------|----------------------|--------------------|-----------------|-----------------|----------------------|---------|------------------------|----------|------|-------------------|---------------|-------------------------|-----------------------------|-----------------------------|-----------------|-------------------|----------------|----------------|----------|------------------|-----------------|---------|------------|-----------|-------------|-----------------|-----------|----------|------------------------------------|--------------------|-------------|---------------------|-----------|----------|--------------------------------|-----------------|-----------|-------------|---------|---------|--------------------|-----------------------|--------------------|------------------------|----------|-------|-----------------|-----------------|------------|----------------|------------|------------------------|----------------------|--------------------|------------|
| Abasia | Abdominal adhesions | Abdominal discomfort | Abdominal distension | Abdominal neoplasm | Abdominal pain | Abdominal pain lower | Abdominal pain upper | Abdominal tenderness | Abnormal behaviour | Abnormal dreams | Abnormal faeces | Abortion spontaneous | Abscess | Accommodation disorder | Acidosis | Acne | Actinic keratosis | Acute abdomen | Acute coronary syndrome | Acute lymphocytic leukaemia | Acute myocardial infarction | Acute psychosis | Acute tonsillitis | Adenocarcinoma | Adenoma benign | Adhesion | Adverse reaction | Affect lability | Ageusia | Aggression | Agitation | Agoraphobia | Agranulocytosis | Akathisia | Akinesia | Alanine aminotransferase increased | Albright's disease | Albuminuria | Alcohol intolerance | Alkalosis | Alopecia | Altered state of consciousness | Amaurosis fugax | Amblyopia | Amenorrhoea | Amnesia | Anaemia | Anaemia macrocytic | Anaemia megaloblastic | Anaphylactic shock | Anaphylactoid reaction | Aneurysm | Anger | Angina pectoris | Angina unstable | Angioedema | Angiomyolipoma | Angiopathy | Angle closure glaucoma | Anorectal discomfort | Anorectal disorder | Anorgasmia |
|--------|---------------------|----------------------|----------------------|--------------------|----------------|----------------------|----------------------|----------------------|--------------------|-----------------|-----------------|----------------------|---------|------------------------|----------|------|-------------------|---------------|-------------------------|-----------------------------|-----------------------------|-----------------|-------------------|----------------|----------------|----------|------------------|-----------------|---------|------------|-----------|-------------|-----------------|-----------|----------|------------------------------------|--------------------|-------------|---------------------|-----------|----------|--------------------------------|-----------------|-----------|-------------|---------|---------|--------------------|-----------------------|--------------------|------------------------|----------|-------|-----------------|-----------------|------------|----------------|------------|------------------------|----------------------|--------------------|------------|

Antibody test positive Antisocial behaviour Antisocial  
 personality disorder Anxiety Aortic aneurysm Aortic dissection  
 Apathy Aphasia Aphonia Aphthous stomatitis  
 Apnoea Appendicitis Application site reaction  
 Arrhythmia Arrhythmia supraventricular Arterial disorder  
 Arterial insufficiency Arterial occlusive disease Arterial  
 stenosis Arterial thrombosis Arteriosclerosis Arteriospasm  
 coronary Arteritis Arthralgia Arthritis Arthropathy Ascites  
 Asocial behaviour Aspartate aminotransferase increased  
 Asphyxia Aspiration Asthenia Asthma Ataxia  
 Atelectasis Atrial fibrillation Atrial flutter Atrial  
 septal defect Atrioventricular block Atrioventricular block first  
 degree Atrioventricular block second degree Atrophy Aura  
 Azotaemia Back pain Bacterial infection Balance disorder  
 Balanoposthitis Basal cell carcinoma Basophilia Benign  
 intracranial hypertension Benign neoplasm Benign neoplasm of  
 skin Benign prostatic hyperplasia Biliary colic Binge eating  
 Bladder cancer Bladder disorder Bladder pain Blepharitis  
 Blepharospasm Blindness Blindness transient Blister  
 Blood alkaline phosphatase increased Blood amylase  
 increased Blood bilirubin abnormal Blood bilirubin increased  
 Blood cholesterol increased Blood creatine phosphokinase  
 increased Blood creatinine increased Blood disorder Blood  
 electrolytes abnormal Blood glucose decreased Blood glucose  
 increased Blood insulin increased Blood iron decreased Blood  
 lactate dehydrogenase increased Blood phosphorus increased Blood  
 potassium decreased Blood potassium increased Blood pressure  
 abnormal Blood pressure diastolic decreased Blood pressure  
 fluctuation Blood pressure increased Blood pressure systolic  
 decreased Blood prolactin increased Blood triglycerides  
 increased Blood triglycerides normal Blood urea increased Blood  
 uric acid increased Blood urine Blood urine present Blunted  
 affect Body temperature decreased Body temperature increased  
 Bone disorder Bone neoplasm Bone pain Bone sarcoma  
 Bradycardia Bradykinesia Bradyphrenia Brain neoplasm  
 Brain neoplasm benign Brain oedema Breast cancer  
 Breast cyst Breast discharge Breast disorder Breast disorder  
 female Breast engorgement Breast enlargement Breast  
 feeding Breast neoplasm Breast pain Breast swelling Breath  
 odour Bronchiolitis Bronchitis Bronchopneumonia  
 Bronchopneumopathy Bronchospasm Bruxism  
 Buccoglossal syndrome Bulimia nervosa Bundle branch block  
 Burning sensation Bursitis Cachexia Calculus bladder  
 Calculus urinary Candidiasis Carbohydrate tolerance decreased  
 Cardiac arrest Cardiac disorder Cardiac failure Cardiac  
 failure congestive Cardiac fibrillation Cardiac flutter  
 Cardiac murmur Cardiac output decreased Cardiac septal  
 defect Cardiac valve disease Cardio-respiratory arrest  
 Cardiomegaly Cardiomyopathy Cardiopulmonary failure  
 Cardiovascular disorder Carotid artery occlusion  
 Carpal tunnel syndrome Cataplexy Cataract Catatonia Cells  
 in urine Cellulitis Cerebral artery embolism Cerebral atrophy  
 Cerebral haemorrhage Cerebral infarction Cerebral  
 ischaemia Cerebrospinal fluid rhinorrhoea Cerebrovascular  
 accident Cerebrovascular disorder Cervicitis Cervix carcinoma

Change of bowel habit Chapped lips Cheilitis Chest  
 discomfort Chest pain Chills Choking Choking sensation  
 Cholecystitis Cholecystitis chronic Cholelithiasis  
 Cholestasis Chorea Choreoathetosis Chromaturia Chronic  
 lymphocytic leukaemia Chronic obstructive pulmonary disease  
 Coagulopathy Coccydynia Cognitive disorder Cogwheel  
 rigidity Cold sweat Colitis ischaemic Colitis ulcerative Colon  
 cancer Colorectal cancer Coma Completed suicide Compulsions  
 Condition aggravated Confusional state Congenital anomaly  
 Congenital eye disorder Congenital foot malformation  
 Congenital genitourinary abnormality Conjunctival  
 haemorrhage Conjunctivitis Connective tissue disorder  
 Constipation Conversion disorder Convulsion  
 Coordination abnormal Corneal lesion Coronary artery  
 disease Coronary artery insufficiency Coronary artery  
 occlusion Costochondritis Cough Crocodile tears syndrome  
 Cyanosis Cystitis Cystitis noninfective Cytolytic  
 hepatitis Deafness Death Decreased appetite Decubitus ulcer  
 Deep vein thrombosis Deficiency anaemia Deformity  
 Dehydration Delirium Delusion Dementia Dental caries  
 Dependence Depersonalisation Depressed level of consciousness  
 Depressed mood Depression Depressive symptom  
 Derealisation Dermal cyst Dermatitis Dermatitis atopic  
 Dermatitis bullous Dermatitis contact Dermatitis  
 exfoliative Dermatitis infected Dermoid cyst Developmental  
 delay Diabetes mellitus Diabetic coma Diabetic hyperglycaemic coma  
 Diabetic hyperosmolar coma Diabetic ketoacidosis  
 Diaphragmatic hernia Diarrhoea Diarrhoea haemorrhagic  
 Diplegia Diplopia Discomfort Disorientation  
 Disseminated intravascular coagulation Dissociation  
 Disturbance in attention Disturbance in sexual arousal  
 Diverticulitis Dizziness Dizziness exertional Dizziness  
 postural Drooling Drug abuse Drug dependence Drug eruption  
 Drug hypersensitivity Drug ineffective Drug interaction Drug  
 level increased Drug withdrawal syndrome Dry eye Dry mouth  
 Dry skin Dry throat Duodenal ulcer Duodenal ulcer  
 haemorrhage Duodenitis Dysaesthesia Dysarthria Dysentery  
 Dysgeusia Dysgraphia Dyskinesia Dysmenorrhoea Dyspepsia  
 Dysphagia Dysphemia Dysphonia Dysphoria Dyspnoea  
 Dyspnoea exertional Dysthymic disorder Dystonia  
 Dysuria Ear disorder Ear infection Ear pain  
 Ecchymosis Eclampsia Eczema Effusion Ejaculation  
 disorder Ejaculation failure Elastosis perforans  
 Electrocardiogram PR interval Electrocardiogram PR  
 prolongation Electrocardiogram QT prolonged Electrocardiogram  
 ST segment Electrocardiogram ST segment depression Electrocardiogram  
 ST segment elevation Electrocardiogram T wave inversion  
 Electrocardiogram abnormal Electrocardiogram change  
 Electroencephalogram abnormal Electrolyte imbalance  
 Embolism Emotional distress Emphysema Encephalopathy  
 Endocrine disorder Endometrial cancer Endometrial  
 neoplasm Endometriosis Energy increased Enteritis Enuresis  
 Enzyme abnormality Eosinophilia Epicondylitis  
 Epididymitis Epilepsy Epistaxis Erectile dysfunction  
 Eructation Erythema Erythema multiforme Erythromelalgia

Euphoric mood      Exfoliative rash      Exostosis      Extrapyrarnidal  
 disorder      Extrasystoles      Eye discharge      Eye disorder      Eye  
 haemorrhage      Eye infection      Eye inflammation      Eye irritation      Eye  
 oedema      Eye pain      Eye pruritus      Eye swelling      Eyelid  
 disorder      Eyelid function disorder      Eyelid oedema      Eyelid  
 ptosis      Face oedema      Facial pain      Facial paresis      Faecal  
 incontinence      Faecalith      Faecaloma      Faeces hard      Fallopiian tube  
 disorder      Fasciitis      Fasting      Fatigue      Fear      Feeling abnormal  
     Feeling cold      Feeling hot      Feeling jittery      Feeling of body  
 temperature change      Female sexual dysfunction      Fibroadenoma of  
 breast      Fibrocystic breast disease      Fibrosis      Flank pain      Flat  
 affect      Flatulence      Fluid overload      Fluid retention      Flushing  
     Foetor hepaticus      Folliculitis      Formication      Fungal infection  
 Fungal skin infection      Furuncle      Gait disturbance  
 Galactorrhoea      Gallbladder cancer      Gallbladder disorder  
     Gamma-glutamyltransferase increased      Gangrene      Gastric  
 cancer      Gastric disorder      Gastric haemorrhage      Gastric pH  
 decreased      Gastric polyps      Gastric ulcer      Gastric ulcer  
 haemorrhage      Gastritis      Gastritis haemorrhagic      Gastroenteritis  
     Gastrointestinal carcinoma      Gastrointestinal disorder  
     Gastrointestinal haemorrhage      Gastrointestinal infection  
     Gastrointestinal neoplasm      Gastrointestinal pain  
     Gastrointestinal stromal tumour      Gastrooesophageal reflux  
 disease      Generalised oedema      Genital candidiasis      Genital  
 discharge      Genital disorder female      Genitourinary tract neoplasm  
     Gestational hypertension      Gingival bleeding      Gingival  
 infection      Gingival pain      Gingivitis      Glaucoma      Glossitis  
     Glossodynia      Glucose tolerance decreased      Glucose tolerance  
 impaired      Glycosuria      Glycosylated haemoglobin increased      Goitre  
     Gout      Grand mal convulsion      Gravitational oedema      Groin pain  
     Growth hormone deficiency      Gynaecomastia      Haemangioma  
     Haematemesis      Haematochezia      Haematocrit decreased  
     Haematoma      Haematuria      Haemoglobin      Haemoglobin decreased  
     Haemoglobin increased      Haemolysis      Haemolytic anaemia  
     Haemoptysis      Haemorrhage      Haemorrhage intracranial      Haemorrhage  
 urinary tract      Haemorrhoids      Haemothorax      Hair disorder  
     Hallucination      Hallucination, auditory      Hallucination,  
 visual      Hangover      Head discomfort      Headache      Hearing impaired  
     Heart disease congenital      Heart rate irregular      Hemianopia  
     Hemiparesis      Hemiplegia      Hepatic enzyme increased      Hepatic  
 failure      Hepatic function abnormal      Hepatic necrosis      Hepatic  
 neoplasm      Hepatic neoplasm malignant      Hepatic steatosis      Hepatitis  
     Hepatobiliary disease      Hepatocellular injury      Hepatomegaly  
     Hereditary disorder      Hernia      Herpes simplex      Herpes  
 virus infection      Herpes zoster      Hiccups      Hirsutism      Homicidal  
 ideation      Hordeolum      Hormone level abnormal      Hostility      Hot flush  
     Hunger      Hydrocephalus      Hyperacusis      Hyperaemia  
     Hyperaesthesia      Hyperbilirubinaemia      Hyperchloraemia  
     Hyperchlorhydria      Hypercholesterolaemia      Hyperglycaemia  
     Hyperhidrosis      Hyperinsulinism      Hyperkalaemia  
     Hyperkeratosis      Hyperkinesia      Hyperlipidaemia  
     Hypernatraemia      Hyperparathyroidism      Hyperpathia      Hyperphagia  
     Hyperphosphataemia      Hyperplasia      Hyperreflexia  
     Hypersensitivity      Hypersexuality      Hypersomnia      Hypertension  
     Hypertensive crisis      Hyperthermia      Hyperthyroidism

Hypertonia Hypertonic bladder Hypertriglyceridaemia  
 Hypertrophy Hyperuricaemia Hyperuricosuria Hyperventilation  
 Hypervigilance Hypoaesthesia Hypoaesthesia oral  
 Hypocalcaemia Hypochloraemia Hypocholesterolaemia  
 Hypochromic anaemia Hypoglycaemia Hypogonadism  
 Hypokalaemia Hypokinesia Hypomagnesaemia Hypomania  
 Hypomenorrhoea Hyponatraemia Hypophagia Hypoproteinaemia  
 Hyporeflexia Hypotension Hypothermia Hypothyroidism  
 Hypotonia Hypoventilation Hypovitaminosis Hypoxia  
 Idiopathic thrombocytopenic purpura Ileus Ileus paralytic  
 Ill-defined disorder Illusion Immune system disorder  
 Impaired healing Inappropriate antidiuretic hormone secretion  
 Incontinence Increased appetite Increased bronchial  
 secretion Induration Infarction Infected cyst Infection  
 Infestation Inflammation Influenza Inguinal hernia  
 Initial insomnia Injection site mass Injection site pain  
 Injection site reaction Inner ear disorder Insomnia  
 Intention tremor Intentional self-injury Intermittent  
 claudication Interstitial lung disease Intervertebral disc  
 degeneration Intervertebral disc disorder Intervertebral disc  
 protrusion Intervertebral discitis Intestinal functional  
 disorder Intestinal obstruction Intestinal perforation  
 Intracranial pressure increased Iron deficiency Iron  
 deficiency anaemia Irritability Irritable bowel syndrome  
 Ischaemia Ischaemic hepatitis Ischaemic stroke Jaundice  
 Jaundice cholestatic Joint contracture Joint effusion Joint  
 range of motion decreased Joint stiffness Joint swelling  
 Judgement impaired Keratitis Keratoconjunctivitis sicca  
 Ketoacidosis Ketonuria Ketosis Laboratory test  
 abnormal Labyrinthitis Lacrimal disorder Lacrimation increased  
 Lactose intolerance Laryngeal cancer Laryngeal disorder  
 Laryngeal neoplasm Laryngeal oedema Laryngitis  
 Laryngospasm Left ventricular failure Leiomyoma Lens  
 disorder Lenticular opacities Lenticular pigmentation  
 Lethargy Leukaemia Leukocytoclastic vasculitis  
 Leukocytosis Leukoderma Leukopenia Leukoplakia oral  
 Libido decreased Libido increased Lichenoid keratosis Lip  
 and/or oral cavity cancer Lip dry Lipoatrophy Lipohypertrophy  
 Lipoma Livedo reticularis Liver disorder Liver  
 function test abnormal Liver injury Lividity Lobar pneumonia  
 Local reaction Localised infection Localised oedema  
 Logorrhoea Loss of consciousness Loss of libido Lower  
 respiratory tract infection Lung cancer metastatic Lung disorder  
 Lung infiltration Lung neoplasm malignant Lymphadenitis  
 Lymphadenopathy Lymphatic disorder Lymphocytic leukaemia  
 Lymphocytosis Lymphoedema Lymphoma Lymphopenia Macular  
 degeneration Macule Maculopathy Major depression Malaise  
 Male sexual dysfunction Malignant melanoma Mania  
 Masked facies Mass Mastitis Mediastinal disorder  
 Melaena Melanocytic naevus Memory impairment Meniere's  
 disease Meningitis Menopausal symptoms Menopause Menorrhagia  
 Menstrual disorder Menstruation irregular Mental disability  
 Mental disorder Mental retardation Mental status changes  
 Mesenteric artery thrombosis Metabolic alkalosis Metastasis  
 Metastatic neoplasm Metrorrhagia Micturition disorder

Micturition urgency Middle ear disorder Middle ear  
effusion Middle insomnia Migraine with aura Migraine without  
aura Miosis Mitral valve incompetence Mobility decreased  
Monarthritits Monocytosis Monoplegia Mood swings Motion  
sickness Motor dysfunction Mouth ulceration Movement disorder  
Multiple myeloma Muscle atrophy Muscle contractions  
involuntary Muscle contracture Muscle enzyme increased  
Muscle fatigue Muscle relaxant therapy Muscle rigidity  
Muscle spasms Muscle tightness Muscle twitching Muscular  
weakness Musculoskeletal chest pain Musculoskeletal deformity  
Musculoskeletal discomfort Musculoskeletal pain  
Musculoskeletal stiffness Myalgia Myasthenic syndrome  
Mydriasis Myelitis Myocardial infarction Myocardial  
ischaemia Myocarditis Myoclonus Myopathy Myopia Myositis  
Nail disorder Nail infection Narcolepsy Nasal congestion  
Nasal disorder Nasal dryness Nasal inflammation Nasal  
polyps Nasopharyngitis Nausea Neck pain Necrosis  
Necrosis ischaemic Neoplasm Neoplasm malignant  
Neoplasm prostate Neoplasm recurrence Neoplasm skin  
Nephritis Nephrolithiasis Nephrotic syndrome Nerve root  
lesion Nervous system disorder Nervousness Neuralgia  
Neuritis Neurodermatitis Neurogenic bladder Neuroleptic  
malignant syndrome Neurological symptom Neuroma Neuropathy  
peripheral Neurosis Neutropenia Neutrophil count decreased  
Neutrophil count increased Night sweats Nightmare  
Nocturia Nodal arrhythmia Nodule Normochromic  
normocytic anaemia Nuchal rigidity Nystagmus Obesity  
Obsessive thoughts Obstruction Obstructive airways disorder  
Ocular hyperaemia Oculogyric crisis Oculomucocutaneous syndrome  
Oedema Oedema mouth Oedema peripheral Oesophageal  
carcinoma Oesophageal disorder Oesophageal spasm Oesophageal  
stenosis Oesophageal ulcer Oesophagitis Oliguria  
Onychomycosis Opisthotonus Optic ischaemic neuropathy  
Optic nerve disorder Oral candidiasis Oral neoplasm benign  
Oral pain Oral pruritus Orchitis noninfective  
Oropharyngeal discomfort Oropharyngeal pain  
Oropharyngeal spasm Orthostatic hypotension  
Osteoarthritis Osteomyelitis Osteonecrosis Osteopenia  
Osteoporosis Otitis externa Otitis media Ovarian  
cancer Ovarian cyst Pain Pain in extremity Pain in jaw Pain  
of skin Pallor Palpitations Pancreatitis acute  
Pancytopenia Panic attack Panic disorder Panic  
disorder with agoraphobia Panic reaction Papilloma  
Paraesthesia Paraesthesia oral Paralysis Paranoia  
Parasomnia Parathyroid disorder Parathyroid tumour  
Paresis Parkinsonian gait Parkinsonism Paronychia  
Parosmia Pathological fracture Pathological gambling  
Pelvic inflammatory disease Pelvic pain Penis disorder  
Peptic ulcer Pericardial effusion Pericarditis  
constrictive Perineal pain Periodontitis Periorbital  
oedema Peripheral coldness Peripheral ischaemia Peripheral  
vascular disorder Peritoneal adhesions Personality change  
Personality disorder Petechiae Pharyngeal disorder  
Pharyngeal erythema Pharyngeal haemorrhage Pharyngeal oedema  
Pharyngitis Phlebitis Phlebitis superficial Phobia

Phonological disorder Phonophobia Photophobia Photopsia  
 Photosensitivity allergic reaction Photosensitivity reaction  
 Pituitary tumour Plasmacytoma Platelet count decreased  
 Pleural disorder Pleural effusion Pleural fibrosis Pleurisy  
 Pleuritic pain Pneumonia Pneumonia aspiration  
 Pneumothorax Poisoning Poliomyelitis Pollakiuria  
 Polycythaemia Polydipsia Polymyalgia rheumatica Polyp  
 Polyuria Post procedural infection Postmenopausal  
 haemorrhage Pre-eclampsia Premature ejaculation Premenstrual  
 syndrome Presyncope Priapism Prinzmetal angina Proctalgia  
 Productive cough Prolactinoma Prostate cancer Prostatic  
 adenoma Prostatic disorder Prostatitis Protein urine present  
 Proteinuria Protrusion tongue Prurigo Pruritus Pruritus  
 genital Pseudolymphoma Psoriasis Psychiatric symptom  
 Psychomotor retardation Psychotic disorder Pulmonary  
 congestion Pulmonary embolism Pulmonary fibrosis Pulmonary  
 hypertension Pulmonary oedema Pulse abnormal Pulse absent  
 Purpura Purpura non-thrombocytopenic Pyelonephritis  
 Pyoderma Pyuria Radiculopathy Rash Rash erythematous  
 Rash maculo-papular Rash papular Rash pustular Rash  
 vesicular Raynaud's phenomenon Rectal cancer Rectal  
 haemorrhage Rectal tenesmus Red blood cell count decreased Red  
 blood cell sedimentation rate increased Reflexes abnormal Reflux  
 oesophagitis Regressive behaviour Regurgitation Renal  
 artery stenosis Renal colic Renal cyst Renal failure acute Renal  
 impairment Renal neoplasm Renal pain Respiration abnormal  
 Respiratory alkalosis Respiratory arrest Respiratory  
 disorder Respiratory distress Respiratory failure Respiratory  
 tract congestion Respiratory tract infection Respiratory tract  
 infection viral Restless legs syndrome Retching Retinal artery  
 occlusion Retinal detachment Retinal disorder Retinal vascular  
 disorder Retinal vascular occlusion Retinal vein thrombosis  
 Retinitis pigmentosa Retroperitoneal fibrosis  
 Rhabdomyolysis Rheumatoid arthritis Rhinitis Rhinitis  
 allergic Rhinitis seasonal Rhinorrhoea Rhonchi Rosacea  
 Rotator cuff syndrome Sacroiliitis Saliva altered  
 Salivary duct obstruction Salivary gland enlargement  
 Salivary gland pain Salivary hypersecretion Salpingitis  
 Sarcoma Scab Schizoaffective disorder Schizophreniform  
 disorder Sciatica Scleral disorder Scotoma Seasonal allergy  
 Seborrhoeic dermatitis Seborrhoeic keratosis Sedation  
 Sensation of heaviness Sensation of pressure Sensory  
 disturbance Sensory loss Sepsis Septic shock Sexual  
 dysfunction Shock Sialoadenitis Sicca syndrome Sick sinus  
 syndrome Sinus arrhythmia Sinus bradycardia Sinus congestion Sinus  
 disorder Sinus headache Sinus tachycardia Sinusitis Skin  
 burning sensation Skin cancer Skin discolouration Skin disorder  
 Skin exfoliation Skin hyperpigmentation Skin hypertrophy Skin  
 infection Skin irritation Skin lesion Skin mass Skin odour  
 abnormal Skin papilloma Skin tightness Skin ulcer Skin  
 wrinkling Sleep apnoea syndrome Sleep attacks Sleep disorder  
 Sleep talking Sluggishness Sneezing Snoring  
 Social avoidant behaviour Somnambulism Somnolence  
 Speech disorder Spinal osteoarthritis Spine malformation  
 Splenic infarction Splenomegaly Spondylitis Sputum

increased Squamous cell carcinoma Status epilepticus  
 Stevens-Johnson syndrome Sticky skin Stomatitis Stress  
 Stridor Stupor Subarachnoid haemorrhage  
 Subcutaneous nodule Subdural haematoma Substance abuse  
 Sudden death Suicidal ideation Suicide attempt Superior  
 sagittal sinus thrombosis Supraventricular extrasystoles  
 Supraventricular tachycardia Suspiciousness Swelling  
 Swelling face Swollen tongue Syncope Synovitis  
 Systemic lupus erythematosus Tachyarrhythmia Tachycardia  
 Tachypnoea Talipes Tardive dyskinesia Temperature  
 intolerance Temporal arteritis Tenderness Tendonitis  
 Tenosynovitis Tension Tension headache Terminal insomnia  
 Testicular disorder Testicular pain Tetany Therapeutic  
 response decreased Therapeutic response increased Thinking  
 abnormal Thirst Thought blocking Throat irritation Throat  
 tightness Thrombocytopenia Thrombocytopenic purpura  
 Thrombocytosis Thrombophlebitis Thrombosis Thyroid adenoma  
 Thyroid cancer Thyroid neoplasm Thyroiditis Tic Tinnitus  
 Tongue discolouration Tongue disorder Tongue dry Tongue  
 oedema Tongue paralysis Tongue spasm Tongue ulceration  
 Tonsillar hypertrophy Tonsillitis Tooth abscess Tooth  
 disorder Tooth impacted Tooth infection Toothache Torsade de  
 pointes Torticollis Toxic epidermal necrolysis Tracheitis  
 Tracheobronchitis Transaminases increased Transient  
 ischaemic attack Tremor Trismus Tuberculin test positive  
 Tubulointerstitial nephritis Type I hypersensitivity Ulcer  
 Ulcer haemorrhage Umbilical hernia Unevaluable event Unintended  
 pregnancy Upper respiratory tract infection Upper-airway cough  
 syndrome Urethral disorder Urethral pain Urethritis Urinary  
 hesitation Urinary incontinence Urinary retention Urinary tract  
 disorder Urinary tract infection Urine abnormality Urine  
 analysis abnormal Urine output increased Urogenital disorder  
 Urosepsis Urticaria Uterine disorder Uterine haemorrhage  
 Uterine leiomyoma Uterine neoplasm Uterovaginal prolapse VIIth  
 nerve paralysis Vaginal discharge Vaginal haemorrhage Vaginal  
 infection Vaginal inflammation Varicose vein Vascular headache  
 Vascular occlusion Vascular purpura Vasculitis  
 Vasoconstriction Vasodilation procedure Vasospasm Vein  
 disorder Venous thrombosis Ventricular arrhythmia Ventricular  
 extrasystoles Ventricular failure Ventricular fibrillation  
 Ventricular hypertrophy Ventricular tachycardia  
 Vertigo Vestibular ataxia Vestibular disorder Viral  
 diarrhoea Viral infection Vision blurred Visual acuity reduced  
 Visual impairment Vitamin B12 deficiency Vitreous detachment  
 Vitreous floaters Vocal cord paralysis Vomiting  
 Vulvovaginal candidiasis Vulvovaginal mycotic infection  
 Vulvovaginal pruritus Vulvovaginitis Water intoxication  
 Weight decreased Weight fluctuation Weight increased  
 Wheezing White blood cell count decreased White blood cell  
 count increased White blood cells urine positive Withdrawal bleed  
 Withdrawal syndrome Wound infection Xerophthalmia  
 Xerosis Yawning

\*\*\*\*\*  
 \*\*\*\*\*



Canalicular multispecific organic anion transporter 2 - Group:  
Transporter

Treated with:

cyclosporine: approved biotech (0 associated side effects)

For treatment of transplant rejection, rheumatoid arthritis,  
severe psoriasis

glutathione: approved, nutraceutical small molecule (0  
associated side effects) For nutritional supplementation, also  
for treating dietary shortage or imbalance

folic acid: approved, nutraceutical small molecule (0 associated  
side effects) For treatment of folic acid deficiency,  
megaloblastic anemia and in anemias of nutritional supplements,  
pregnancy, infancy, or childhood.

clotrimazole: approved small molecule (28 associated side  
effects) For the local treatment of oropharyngeal candidiasis and  
vaginal yeast infections, also used in fungal infections of the skin  
such as ringworm, athlete's foot, and jock itch.

conjugated estrogens: approved small molecule (219 associated  
side effects) For the treatment of moderate to severe vasomotor  
symptoms associated with the menopause, atrophic vaginitis,  
osteoporosis, hypoestrogenism due to hypogonadism, castration,  
primary ovarian failure, breast cancer (for palliation only), and  
Advanced androgen-dependent carcinoma of the prostate (for  
palliation only)

indomethacin: approved small molecule (164 associated side  
effects) For moderate to severe rheumatoid arthritis including  
acute flares of chronic disease, ankylosing spondylitis,  
osteoarthritis, acute painful shoulder (bursitis and/or tendinitis)  
and acute gouty arthritis.

omeprazole: approved small molecule (261 associated side  
effects) For the treatment of acid-reflux disorders (GERD), peptic  
ulcer disease, H. pylori eradication, and prevention of  
gastrointestinal bleeds with NSAID use.

cisplatin: approved small molecule (111 associated side  
effects) For the treatment of metastatic testicular tumors,  
metastatic ovarian tumors and advanced bladder cancer.

vincristine: approved small molecule (118 associated side  
effects) For treatment of acute leukaemia, malignant lymphoma,  
Hodgkin's disease, acute erythraemia, acute panmyelosis

methotrexate: approved small molecule (209 associated side  
effects) For the treatment of gestational choriocarcinoma,  
chorioadenoma destruens and hydatidiform mole. Also for the  
treatment of severe psoriasis and severe, active, classical or  
definite rheumatoid arthritis.

leucovorin: approved small molecule (34 associated side effects)  
For the treatment of osteosarcoma (after high dose

methotrexate therapy). Used to diminish the toxicity and counteract  
the effects of impaired methotrexate elimination and of inadvertent  
overdosages of folic acid antagonists, and to treat megaloblastic  
anemias due to folic acid deficiency. Also used in combination with  
5-fluorouracil to prolong survival in the palliative treatment of  
patients with advanced colorectal cancer.

verapamil: approved small molecule (113 associated side  
effects) For the treatment of hypertension, angina, and cluster  
headache prophylaxis.

etoposide: approved small molecule (109 associated side effects) For use in combination with other chemotherapeutic agents in the treatment of refractory testicular tumors and as first line treatment in patients with small cell lung cancer. Also used to treat other malignancies such as lymphoma, non-lymphocytic leukemia, and glioblastoma multiforme.

doxorubicin: approved small molecule (362 associated side effects) For the treatment of Kaposi's sarcoma connected to AIDS.

metoprolol: approved small molecule (14 associated side effects) Used as a diagnostic drug for testing hypothalamic-pituitary ACTH function. Occasionally used in Cushing's syndrome.

glyburide: approved small molecule (52 associated side effects) Indicated as an adjunct to diet to lower the blood glucose in patients with NIDDM whose hyperglycemia cannot be satisfactorily controlled by diet alone.

probenecid: approved small molecule (27 associated side effects) For the reduction of serum uric acid concentrations in chronic gouty arthritis and tophaceous gout in patients with frequent disabling gout attacks. Has also been effectively used to promote uric acid excretion in hyperuricemia secondary to the administration of thiazide and related diuretics.

rifampin: approved small molecule (0 associated side effects) For the treatment of Tuberculosis and Tuberculosis-related mycobacterial infections.

nifedipine: approved small molecule (217 associated side effects) For the management of vasospastic angina, chronic stable angina, hypertension, and Raynaud's phenomenon. May be used as a first line agent for left ventricular hypertrophy and isolated systolic hypertension (long-acting agents).

sulfinpyrazone: approved small molecule (0 associated side effects) For the treatment of gout and gouty arthritis.

phenobarbital: approved small molecule (54 associated side effects) For the treatment of all types of seizures except absence seizures.

cholic acid: experimental small molecule (0 associated side effects)

taurocholic acid: experimental small molecule (0 associated side effects)

794 known side effects mediated through drugs targeting this protein:

5q minus syndrome Abdominal discomfort Abdominal distension  
Abdominal mass Abdominal pain Abdominal pain upper  
Abscess Acidosis Acne Acute abdomen Acute coronary  
syndrome Acute generalised exanthematous pustulosis Acute  
leukaemia Acute lymphocytic leukaemia Acute myeloid leukaemia  
Adrenal disorder Affect lability Ageusia Aggression  
Agitation Agranulocytosis Alanine aminotransferase increased  
Albuminuria Alkalosis Alopecia Alveolitis Alveolitis  
allergic Amblyopia Amenorrhoea Amnesia Anaemia Anaemia  
megaloblastic Anal pruritus Anaphylactic shock  
Anaphylactoid reaction Angina pectoris Angioedema Angiopathy  
Anorectal discomfort Anorectal disorder Anxiety  
Aortic dissection Apathy Aphasia Aphthous stomatitis  
Aplastic anaemia Apnoea Application site reaction

Arrhythmia Arterial disorder Arterial thrombosis Arteritis  
 Arthralgia Arthritis Arthropathy Ascites Aspartate  
 aminotransferase increased Aspiration Asthenia Asthma  
 Ataxia Atonic urinary bladder Atrial fibrillation  
 Atrioventricular block Atrioventricular block complete  
 Atrioventricular dissociation Atrophy Autonomic  
 neuropathy Azoospermia Azotaemia Back pain Balance disorder  
 Balanitis Benign neoplasm Bezoar Bladder pain  
 Blepharitis Blindness Blindness cortical Blindness  
 transient Blister Blood albumin decreased Blood alkaline  
 phosphatase increased Blood amylase increased Blood bilirubin  
 increased Blood creatinine increased Blood disorder Blood  
 gastrin increased Blood glucose decreased Blood glucose  
 increased Blood potassium increased Blood pressure increased  
 Blood prolactin increased Blood triglycerides increased  
 Blood uric acid increased Body temperature decreased Body  
 temperature increased Bone disorder Bone pain Bradycardia  
 Breast cancer stage IV Breast discharge Breast discomfort  
 Breast disorder Breast engorgement Breast enlargement  
 Breast mass Breast neoplasm Breast pain Breast swelling  
 Breast tenderness Bronchitis Bronchospasm Bundle branch  
 block Burning sensation Cachexia Cancer in remission Candidiasis  
 Carbohydrate tolerance decreased Carcinoid tumour Cardiac  
 arrest Cardiac disorder Cardiac failure Cardiac failure  
 congestive Cardiac fibrillation Cardiogenic shock Cardiomegaly  
 Cardiomyopathy Cardiovascular disorder Cell death  
 Cellulitis gangrenous Cerebral arteritis Cerebral artery  
 thrombosis Cerebral thrombosis Cerebrovascular accident  
 Cervical discharge Cervix disorder Chest discomfort Chest  
 pain Chills Chloasma Cholangitis Cholangitis sclerosing  
 Cholestasis Chorea Clonus Coagulopathy Cognitive  
 disorder Colitis ischaemic Colitis ulcerative Colorectal cancer  
 Coma Confusional state Conjunctivitis Connective tissue  
 disorder Constipation Convulsion Coombs direct test positive  
 Coordination abnormal Corneal deposits Coronary artery  
 disease Coronary artery thrombosis Cough Crocodile tears  
 syndrome Crohn's disease Cryptococcosis Cyanosis Cystitis  
 Cystitis noninfective Cytolytic hepatitis Cytomegalovirus  
 infection Deafness Deafness bilateral Death Decreased  
 appetite Deep vein thrombosis Dehydration Delirium Dementia  
 Dental plaque Depersonalisation Depressed level of  
 consciousness Depression Depressive symptom Dermatitis  
 Dermatitis atopic Dermatitis bullous Dermatitis contact  
 Dermatitis exfoliative Diabetes mellitus Diarrhoea Diplopia  
 Discomfort Disease progression Disseminated intravascular  
 coagulation Dissociation Disturbance in attention Disturbance  
 in sexual arousal Diverticulum Dizziness Drug abuse Drug  
 hypersensitivity Drug interaction Dry eye Dry mouth Dry skin  
 Duodenitis Dysaesthesia Dysarthria Dysgeusia Dyskinesia  
 Dysmenorrhoea Dyspepsia Dysphagia Dysphonia Dysplasia  
 Dyspnoea Dysuria Ear infection Ear pain Ecchymosis  
 Ectropion of cervix Effusion Ejection fraction Elderly  
 Electrocardiogram abnormal Electrocardiogram change  
 Electrolyte imbalance Embolism Embolism venous Emotional  
 disorder Encephalopathy Endometrial cancer Endometrial

hypertrophy Endometriosis Enteritis Enterocolitis  
 Eosinophilia Epilepsy Epistaxis Erectile dysfunction  
 Eructation Erythema Erythema multiforme Erythema nodosum  
 Erythromelalgia Erythropenia Extrapyrarnidal disorder  
 Extrasystoles Extravasation Eye disorder Eye  
 haemorrhage Eye irritation Eye pain Eyelid ptosis Face oedema  
 Facial nerve disorder Faecalith Faecaloma Faeces  
 discoloured Fasciitis Fatigue Febrile neutropenia Feeling  
 abnormal Feeling cold Feeling hot Feeling jittery Fibrocystic  
 breast disease Fibromyalgia Fibrosis Flat affect Flatulence  
 Fluid retention Flushing Foetor hepaticus Folliculitis  
 Fungal infection Fungal skin infection Furuncle Gait  
 disturbance Galactorrhoea Gallbladder disorder Gamma-  
 glutamyltransferase increased Gastric disorder Gastric  
 perforation Gastric polyps Gastric ulcer Gastrinoma Gastritis  
 Gastritis erosive Gastroenteritis Gastrointestinal candidiasis  
 Gastrointestinal disorder Gastrointestinal haemorrhage  
 Gastrointestinal necrosis Gastrointestinal obstruction  
 Gastrointestinal oedema Gastrointestinal pain  
 Gastrointestinal toxicity Gastrointestinal tract irritation  
 Gastrooesophageal reflux disease Generalised oedema  
 Genital candidiasis Genital discharge Gingival bleeding  
 Gingival disorder Gingival hyperplasia Gingival pain  
 Gingivitis Glossitis Glucose tolerance decreased Glucose  
 tolerance impaired Glycosuria Goitre Gout Gynaecomastia  
 Haemangioma Haematemesis Haematocrit decreased Haematuria  
 Haemoglobin Haemolysis Haemolytic anaemia Haemolytic  
 uraemic syndrome Haemoptysis Haemorrhage Haemorrhage intracranial  
 Haemorrhagic disorder Hallucination Hand and foot syndrome  
 secondary to sickle cell anaemia Hangover Headache Hearing  
 impaired Hemiparesis Hemiplegia Hepatic cirrhosis Hepatic  
 encephalopathy Hepatic enzyme increased Hepatic failure  
 Hepatic function abnormal Hepatic necrosis Hepatitis  
 Hepatitis acute Hepatobiliary disease Hepatocellular injury  
 Hepatosplenomegaly Hernia Herpes simplex Herpes  
 virus infection Herpes zoster Hiccups Hirsutism  
 Histoplasmosis Hot flush Hydronephrosis Hyperaemia  
 Hyperaesthesia Hyperbilirubinaemia Hypercalcaemia  
 Hyperglycaemia Hyperhidrosis Hyperkalaemia  
 Hyperkeratosis Hyperkinesia Hyperlipidaemia  
 Hypermagnesaemia Hypernatraemia Hyperplasia  
 Hyperprolactinaemia Hypersensitivity Hypertension  
 Hypertonia Hypertriglyceridaemia Hypertrophic cardiomyopathy  
 Hypertrophy Hyperuricaemia Hyperventilation Hypoaesthesia  
 Hypocalcaemia Hypochloraemia Hypochromic anaemia  
 Hypogammaglobulinaemia Hypoglycaemia Hypokalaemia  
 Hypokinesia Hypolipidaemia Hypomagnesaemia Hyponatraemia  
 Hypophosphataemia Hypopituitarism Hypoproteinaemia Hypotension  
 Hypothermia Hypothyroidism Hypotonia Hypoventilation  
 Hypoxia Ichthyosis acquired Ileitis Ileus Ileus  
 paralytic Ill-defined disorder Immune system disorder  
 Inappropriate antidiuretic hormone secretion Incontinence  
 Increased appetite Infarction Infection Infertility  
 Infestation Inflammation Influenza Injection site  
 haemorrhage Injection site infection Injection site inflammation

Injection site pain Injection site reaction Inner ear  
disorder Insomnia Intermittent claudication Interstitial lung  
disease Intestinal functional disorder Intestinal obstruction  
Intestinal ulcer Intra-uterine death Irritability  
Irritable bowel syndrome Jaundice Jaundice cholestatic  
Joint stiffness Joint swelling Kaposi's sarcoma AIDS  
related Keratitis Keratoconjunctivitis sicca Ketosis  
Laboratory test abnormal Lacrimal disorderLacrimation  
decreased Lacrimation increased Large intestine carcinoma  
Laryngeal disorder Laryngeal oedema Laryngitis  
Laryngospasm Leiomyoma Lethargy Leukaemia  
Leukocytoclastic vasculitis Leukocytosis  
Leukoencephalopathy Leukopenia Leukoplakia oral Libido  
decreased Liver disorder Liver function test abnormalLiver  
injury Loss of consciousness Loss of libido Lung disorder  
Lung infection Lymphadenopathy Lymphangitis Lymphocytic  
leukaemia LymphoedemaLymphoma LymphopeniaLymphoproliferative  
disorder Macule MaculopathyMalaise Malnutrition Mass  
Mastitis Mediastinal disorder Melaena Meningioma benign  
Meningitis Meningitis aseptic Menopausal symptoms  
MenorrhagiaMenstrual disorder Mental disabilityMental  
disorder Metabolic acidosis Metrorrhagia Microangiopathy  
Micturition urgency Migraine Mood swingsMouth ulceration  
Mucosal inflammation Mucous membrane disorder Muscle  
atrophy Muscle fatigue Muscle relaxant therapy Muscle  
rigidity Muscle spasms Muscle twitching Muscular weakness  
Musculoskeletal discomfort Musculoskeletal pain  
Musculoskeletal stiffness Myalgia Myelodysplastic  
syndrome Myeloid leukaemiaMyocardial infarction Myocardial  
ischaemia MyocarditisMyoclonus Myositis Nail disorder Nasal  
congestion Nasopharyngitis Nausea Neck pain Necrosis  
Necrotising colitis Necrotising enterocolitis neonatal  
Necrotising fasciitis Neoplasm Neoplasm malignant  
Nephritic syndrome Nephritis Nephrolithiasis Nephropathy  
toxic Nephrotic syndrome Nerve root lesionNervous system  
disorder NervousnessNeuralgia Neuritis Neurological symptom  
Neuropathy peripheral NeutropeniaNightmare Nipple pain  
NocardiosisNocturia Nodule Nuchal rigidity Nystagmus  
ObstructionObstructive airways disorderOedema Oedema  
genital Oedema peripheralOesophageal candidiasis Oesophageal  
disorder Oesophageal stenosis Oesophageal ulcerOesophagitis  
Oligomenorrhoea Oliguria Onycholysis Opportunistic  
infection Optic atrophy Optic ischaemic neuropathy Optic nerve  
disorder Optic neuritis Oral candidiasis Oral disorder  
Oropharyngeal discomfort Oropharyngeal pain Orthostatic  
hypotensionOsteoarthritis Osteomalacia Osteonecrosis  
Osteoporosis Otitis media Ovarian cancer Pain Pain  
in extremity Pain in jawPain of skin Pallor Palmar-  
plantar erythrodysesthesia syndrome Palpitations Pancreatic  
disorder Pancreatitis Pancytopenia Papilloedema  
Paraesthesia Paralysis Paranoia Paresis Parosmia  
Parotitis Pathological fracture Pelvic painPeptic ulcer  
Pericardial effusion Pericarditis Periorbital oedema  
Peripheral motor neuropathy Peripheral sensory neuropathy  
Peroneal nerve palsy Petechiae Pharyngeal disorder

Pharyngitis Phlebitis Phlebosclerosis Phobia  
 Photosensitivity reaction Pigmentation disorder Plantar  
 erythema Platelet aggregation decreased Platelet count  
 decreased Pleural disorder Pleural effusion Pneumocystis jiroveci  
 pneumonia Pneumonia Pneumonia cytomegaloviral Pneumothorax  
 Poisoning Pollakiuria Polymyalgia rheumatica Polyneuropathy  
 Polyp Polyuria Porphyria Porphyria non-acute Posterior  
 reversible encephalopathy syndrome Precocious puberty Premature  
 menopause Proctalgia Proctitis Proctitis ulcerative Productive  
 cough Protein urine present Proteinuria Prothrombin level increased  
 Prurigo Pruritus Pruritus genital Psoriasis Psychotic  
 disorder Puberty Pulmonary congestion Pulmonary embolism  
 Pulmonary fibrosis Pulmonary function test decreased  
 Pulmonary haemorrhage Pulmonary hypertension Pulmonary oedema  
 Pulmonary toxicity Purpura Pyuria Quadripareisis  
 Radiculopathy Rales Rash Rash erythematous Rash generalised  
 Rash macular Rash maculo-papular Rash pustular  
 Raynaud's phenomenon Recall phenomenon Rectal haemorrhage  
 Rectal tenesmus Reflux oesophagitis Regurgitation Renal  
 colic Renal failure Renal failure acute Renal failure chronic  
 Renal impairment Renal tubular disorder Respiratory depression  
 Respiratory disorder Respiratory failure Respiratory tract  
 congestion Respiratory tract infection Retinal pigmentation  
 Retinal vein thrombosis Retinitis pigmentosa Retinopathy  
 of prematurity Rhinitis Rhinorrhoea Salivary hypersecretion  
 Scotoma Sedation Sensitisation Sensory loss  
 Sepsis Septic shock Shock Sinus arrest Sinus  
 tachycardia Sinusitis Skin burning sensation Skin candida Skin  
 discolouration Skin disorder Skin exfoliation Skin  
 hyperpigmentation Skin irritation Skin mass Skin necrosis Skin  
 ulcer Sleep disorder Smear cervix abnormal Soft tissue necrosis  
 Somnolence Speech disorder Spinal cord disorder Stevens-  
 Johnson syndrome Stomatitis Strabismus Stridor Subcutaneous  
 nodule Sudden death Swelling Swollen tongue Syncope  
 Tachyarrhythmia Tachycardia Tachypnoea Telangiectasia  
 Tenderness Tension Testicular pain Tetany Thinking  
 abnormal Thirst Throat tightness Thrombocytopenia  
 Thrombocytopenic purpura Thrombophlebitis superficial  
 Thrombosis Thrombotic microangiopathy Tinnitus Tongue  
 atrophy Tongue discolouration Tongue disorder Tongue oedema  
 Tooth abscess Tooth impacted Toxic epidermal necrolysis  
 Toxoplasmosis Transaminases increased Tremor  
 Tubulointerstitial nephritis Tumour lysis syndrome Ulcer Upper  
 respiratory tract infection Ureteric obstruction Urethral disorder  
 Urethral obstruction Urinary incontinence Urinary retention  
 Urinary tract disorder Urinary tract infection Urine  
 abnormality Urine analysis abnormal Urine output increased  
 Urogenital disorder Urticaria Uterine cancer Uterine  
 cervical erosion Uterine leiomyoma Uterine spasm Uterovaginal  
 prolapse VIIth nerve paralysis Vaginal discharge Vaginal  
 haemorrhage Vaginal infection Vaginal inflammation Varices  
 oesophageal Varicose vein Vascular purpura Vasculitis  
 Vasodilation procedure Venous thrombosis Ventricular arrhythmia  
 Vertigo Viral infection Vision blurred Visual acuity  
 reduced Visual impairment Vitamin B12 deficiency Vocal cord

paralysis Vocal cord paresis Vomiting Vulvovaginal burning  
sensation Vulvovaginal candidiasis Vulvovaginal mycotic  
infection Vulvovaginal pruritus Weight decreased Weight increased  
Wheezing White blood cell count decreased Withdrawal bleed  
X-linked lymphoproliferative syndrome

\*\*\*\*\*  
\*\*\*\*\*

Beta platelet-derived growth factor receptor - Group: Enzyme

Treated with:

becaplermin: approved biotech (0 associated side effects)

For topical treatment of skin ulcers (from diabetes)

sorafenib: approved small molecule (130 associated side effects) For the treatment of patients with advanced renal cell carcinoma.

imatinib: approved small molecule (248 associated side effects) For the treatment Philadelphia chromosome positive chronic myeloid leukemia (CML) and malignant gastrointestinal stromal tumors (GIST).

dasatinib: approved small molecule (251 associated side effects) For the treatment of adults with chronic, accelerated, or myeloid or lymphoid blast phase chronic myeloid leukemia with resistance or intolerance to prior therapy. Also indicated for the treatment of adults with Philadelphia chromosome-positive acute lymphoblastic leukemia with resistance or intolerance to prior therapy.

sunitinib: approved small molecule (198 associated side effects) For the treatment of advanced renal cell carcinoma as well as the treatment of gastrointestinal stromal tumor after disease progression on or intolerance to imatinib mesylate.

471 known side effects mediated through drugs targeting this protein:

Abdominal discomfort Abdominal distension Abdominal pain  
Abdominal pain upper Acne Acute coronary syndrome Acute  
febrile neutrophilic dermatosis Acute generalised exanthematous  
pustulosis Acute hepatic failure Acute respiratory distress  
syndrome Adrenal insufficiency Affect lability Ageusia  
Alanine aminotransferase increased Alopecia Alveolar  
proteinosis Amnesia Anaemia Anal fissure Angina pectoris  
Angioedema Angiopathy Anxiety Aortic dissection Aphagia  
Apthous stomatitis Aplasia Aplasia pure red cell  
Aplastic anaemia Apoptosis Arrhythmia Arthralgia Ascites  
Aspartate aminotransferase increased Assisted fertilisation  
Asthenia Asthma Atrial fibrillation Atrial flutter  
Back pain Blindness Blindness cortical Blister Blood  
albumin decreased Blood alkaline phosphatase increased Blood  
amylase increased Blood bilirubin increased Blood creatine  
phosphokinase increased Blood creatinine increased Blood  
disorder Blood glucose decreased Blood glucose increased  
Blood lactate dehydrogenase increased Blood magnesium  
decreased Blood phosphorus decreased Blood potassium decreased  
Blood potassium increased Blood sodium increased Blood  
thyroid stimulating hormone increased Blood urea increased Blood  
uric acid increased Body temperature increased Bone marrow  
necrosis Bone pain Bradycardia Brain oedema Breast disorder

Breast enlargement Breast feeding Bronchospasm  
 Calcinosis Cardiac disorder Cardiac failure Cardiac failure  
 acute Cardiac failure congestive Cardiac fibrillation Cardiac  
 flutter Cardiac hypertrophy Cardiac tamponade Cardiogenic shock  
 Cardiomegaly Cardiomyopathy Cell death Cerebral  
 haemorrhage Cerebral infarction Cerebrovascular accident Chest  
 pain Chills Cholangitis Cholecystitis Cholestasis Chronic  
 myeloid leukaemia Coagulopathy Colitis Completed suicide  
 Confusional state Congenital skin disorder Congestive  
 cardiomyopathy Conjunctival haemorrhage Conjunctivitis  
 Connective tissue disorder Constipation Convulsion Cor  
 pulmonale Cough Cytogenetic abnormality Death Decreased  
 appetite Deep vein thrombosis Dehydration Delirium tremens  
 Depressed mood Dermatitis Dermatitis bullous Dermatitis  
 exfoliative Dermatitis psoriasiform Diarrhoea Diastolic  
 dysfunction Discomfort Disease progression Disturbance in sexual  
 arousal Diverticulitis Dizziness Drug eruption Drug  
 interaction Dry eye Dry mouth Dry skin Dysgeusia Dyspepsia  
 Dysphagia Dysphonia Dyspnoea Dyspnoea exertional Ear  
 haemorrhage Ecchymosis Eczema Effusion Ehlers-Danlos syndrome  
 Ejection fraction decreased Electrocardiogram PR interval  
 Embolism Embolism venous Endocrine disorder  
 Enterocolitis Eosinophilia Epistaxis Erectile  
 dysfunction Erythema Erythema multiforme Erythema nodosum Eye  
 disorder Eye haemorrhage Eye oedema Face oedema Fatigue  
 Febrile neutropenia Feeling abnormal Feeling cold  
 Fibrosis Fistula Flank pain Flatulence Fluid retention  
 Flushing Folliculitis Gastric haemorrhage Gastric  
 ulcer Gastritis Gastroenteritis Gastrointestinal disorder  
 Gastrointestinal haemorrhage Gastrointestinal neoplasm  
 Gastrointestinal pain Gastrointestinal perforation  
 Gastrointestinal tract irritation Gastrointestinal ulcer  
 Gastrooesophageal reflux disease Generalised oedema  
 Genital rash Gingival bleeding Gingival pain Gingivitis  
 Glaucoma Glossitis Glossodynia Gout Gynaecomastia  
 Haematemesis Haematochezia Haematological malignancy  
 Haematoma Haematuria Haemoglobin decreased Haemoptysis  
 Haemorrhage Haemorrhoids Hair colour changes Headache  
 Heat rash Hepatic enzyme increased Hepatic failure  
 Hepatic function abnormal Hepatic necrosis Hepatic neoplasm  
 malignant Hepatitis Hepatobiliary disease Herpes simplex  
 Herpes virus infection Herpes zoster Hormone level abnormal  
 Hypercalcaemia Hyperglycaemia Hyperhidrosis  
 Hyperkalaemia Hypernatraemia Hyperplasia Hypersensitivity  
 Hypertension Hypertensive crisis Hyperthyroidism  
 Hypertrophy Hyperuricaemia Hypoalbuminaemia Hypocalcaemia  
 Hypogeusia Hypoglycaemia Hypokalaemia Hyponatraemia  
 Hypophosphataemia Hypotension Hypothyroidism Ileus Ill-defined  
 disorder Immune system disorder Immunosuppression Infarction  
 Infection Infestation Inflammation Influenza Influenza  
 like illness Insomnia Interstitial lung disease Intestinal  
 obstruction Intra-abdominal haematoma Intracranial pressure  
 increased Ischaemia Jaundice Joint swelling Keratoacanthoma  
 Lacrimation increased Left ventricular dysfunction Left  
 ventricular failure Leukoderma Leukoencephalopathy Leukopenia



Libido decreased Lipase increased Livedo reticularis Liver  
 disorder Liver function test abnormal Lividity Localised oedema  
 Loss of consciousness Lower respiratory tract infection Lung  
 disorder Lung infiltration Lung neoplasm malignant Lymphoma  
 Lymphopenia Macular oedema Malaise Mastocytic leukaemia  
 Mastocytoma Mediastinal disorder Melaena Memory impairment  
 Menorrhagia Menstruation irregular Mental disorder Metastasis  
 Metastatic neoplasm Metastatic renal cell carcinoma  
 Metrorrhagia Microangiopathy Migraine Milia Mood swings  
 Mouth ulceration Mucosal dryness Mucosal inflammation  
 Muscle spasms Muscular weakness Musculoskeletal discomfort  
 Musculoskeletal disorder Musculoskeletal pain  
 Musculoskeletal stiffness Myalgia Myelodysplastic  
 syndrome Myeloproliferative disorder Myocardial infarction  
 Myocardial ischaemia Myocarditis Myopathy Myositis Nail  
 disorder Nasopharyngitis Nausea Necrosis Necrosis  
 ischaemic Neoplasm malignant Nephritis Nephropathy Nephropathy  
 toxic Nephrotic syndrome Nervous system disorder Neuritis  
 Neuropathy peripheral Neutropenia Neutropenic colitis Night  
 sweats Obstruction Oedema Oedema peripheral Oesophageal  
 disorder Oesophagitis Opportunistic infection Optic  
 neuritis Oral pain Oropharyngeal discomfort Oropharyngeal  
 pain Osteonecrosis Ovarian disorder Pain Pain in extremity  
 Palmar-plantar erythrodysesthesia syndrome Palpitations  
 Pancreatic disorder Pancreatitis Pancytopenia  
 Panniculitis Papilloedema Papilloma Paraesthesia  
 Parity Pericardial effusion Pericarditis Periorbital  
 oedema Peripheral coldness Peripheral sensory neuropathy  
 Petechiae Pharyngitis Photosensitivity reaction  
 Pigmentation disorder Platelet aggregation abnormal  
 Platelet count decreased Pleural disorder Pleural effusion  
 Pneumonia Pollakiuria Posterior reversible encephalopathy  
 syndrome Primary hypothyroidism Protein urine present Protein-  
 losing gastroenteropathy Proteinuria Prurigo Pruritus  
 Psoriasis Pulmonary arterial hypertension Pulmonary  
 embolism Pulmonary fibrosis Pulmonary haemorrhage Pulmonary  
 hypertension Pulmonary oedema Purpura Rash Rash erythematous  
 Rash follicular Rash generalised Rash macular Rash  
 maculo-papular Rash papular Rash pustular Rash vesicular  
 Reflux oesophagitis Regressive behaviour Renal failure  
 Renal failure acute Renal impairment Renal tubular disorder  
 Respiratory distress Respiratory tract infection Retinal  
 haemorrhage Rhabdomyolysis Rhinitis Rhinorrhoea Sciatica  
 Scleral haemorrhage Sepsis Sexual dysfunction  
 Sexually active Shock Sinusitis Skin cancer Skin  
 discolouration Skin disorder Skin exfoliation Skin irritation  
 Skin ulcer Social avoidant behaviour Soft tissue disorder  
 Somnolence Splinter haemorrhages Squamous cell carcinoma  
 Stomatitis Swelling Syncope Systemic lupus erythematosus  
 Systemic lupus erythematosus rash Systemic mastocytosis  
 Tachycardia Temperature intolerance Tenderness Tendonitis  
 Testicular disorder Thrombocytopenia Thrombophlebitis  
 Thrombosis Thrombotic microangiopathy Thyroid disorder  
 Thyroiditis Tinnitus Tongue ulceration Toxic epidermal  
 necrolysis Toxic skin eruption Transient ischaemic attack

Tremor Tubulointerstitial nephritis Tumour lysis syndrome  
 Tumour necrosis Tumour pain Ulcer Upper respiratory tract  
 infection Urethral disorder Urinary tract disorder Urticaria  
 Urticaria vesiculosa Uterine haemorrhage Vaginal discharge  
 Vaginal haemorrhage Varicella Varices oesophageal  
 Varicose vein Vascular purpura Venous thrombosis Ventricular  
 arrhythmia Ventricular dysfunction Ventricular failure  
 Ventricular tachycardia Vertigo Viral infection  
 Vision blurred Visual acuity reduced Visual impairment  
 Vitreous haemorrhage Vomiting Weight decreased Weight  
 increased Wound haemorrhage Yellow skin

\*\*\*\*\*  
 \*\*\*\*\*

Potassium voltage-gated channel subfamily KQT member 3 - Group:  
 Channel

Treated with:

diclofenac: approved small molecule (310 associated side  
 effects) For the acute and chronic treatment of signs and symptoms  
 of osteoarthritis and rheumatoid arthritis.

310 known side effects mediated through drugs targeting this  
 protein:

Abdominal distension Abdominal pain upper Abscess Acne Acute  
 coronary syndrome Agitation Agranulocytosis Alanine  
 aminotransferase increased Alopecia Amblyopia Anaemia  
 Anaphylactic shock Anaphylactoid reaction Angina pectoris  
 Angioedema Angiopathy Anorectal disorder Anxiety  
 Aortic dissection Aphasia Aphthous stomatitis Aplastic  
 anaemia Application site reaction Arrhythmia Arteriosclerosis  
 Arthralgia Aspartate aminotransferase increased Asthenia  
 Asthma Atrophy Azotaemia Back pain Bladder pain  
 Bleeding time prolonged Blindness Blister Blood  
 creatine phosphokinase increased Blood creatinine increased Body  
 temperature increased Bone pain Bradycardia Breast disorder  
 Breath odour Bronchitis Burning sensation Cardiac disorder  
 Cardiac failure Cardiac failure congestive Cardiovascular  
 disorder Cerebrovascular accident Chest pain Chills  
 Colitis ulcerative Coma Confusional state Conjunctival  
 hyperaemia Conjunctivitis allergic Constipation Convulsion  
 Coordination abnormal Corneal deposits Corneal disorder  
 Corneal erosion Corneal infiltrates Corneal oedema  
 Corneal opacity Cough Cystitis Cystitis noninfective  
 Deafness Death Decreased appetite Dental caries  
 Dermatitis bullous Dermatitis contact Dermatitis  
 exfoliative Diarrhoea Diarrhoea haemorrhagic Diplopia Discomfort  
 Disorientation Disturbance in attention Dizziness Drug  
 ineffective Dry mouth Dry skin Dysgeusia Dyspepsia Dyspnoea  
 Dysthymic disorder Dysuria Ear pain Ecchymosis  
 Eczema Enterocolitis haemorrhagic Eosinophilia  
 Epistaxis Erectile dysfunction Eructation Erythema  
 multiforme Erythema of eyelid Eye allergy Eye disorder Eye  
 inflammation Eye irritation Eye pain Eye pruritus  
 Eyelid oedema Eyelids pruritus Face oedema Fatigue  
 Feeling abnormal Flatulence Fluid retention Flushing  
 Furuncle Gait disturbance Gastric pH decreased Gastritis

Gastroenteritis Gastrointestinal disorder Gastrointestinal  
 haemorrhage Gastrointestinal pain Gingivitis Glossitis Gout  
 Haematemesis Haematuria Haemoglobin Haemolytic anaemia  
 Haemorrhage Haemorrhoids Hair disorder Hallucination  
 Headache Hearing impaired Henoch-Schonlein purpura  
 Hepatic cirrhosis Hepatic enzyme increased Hepatic failure  
 Hepatic function abnormal Hepatic necrosis Hepatitis  
 Hepatitis fulminant Hepatobiliary disease Hepatorenal  
 syndrome Hereditary disorder Hernia Herpes simplex  
 Herpes virus infection Hyperaemia Hyperaesthesia  
 Hyperchlorhydria Hypercholesterolaemia Hyperglycaemia  
 Hyperhidrosis Hyperkinesia Hypertension Hypertonia  
 Hypertrophy Hyperventilation Hypoaesthesia Hypoglycaemia  
 Hypokinesia Hypotension Ill-defined disorder Immune system  
 disorder Infarction Infection Infestation Influenza Insomnia  
 Intestinal perforation Intraocular pressure increased  
 Iritis Irritability Jaundice Keratitis Lacrimal  
 disorder Lacrimation increased Laryngeal oedema Laryngitis  
 Laryngospasm Leukopenia Lip swelling Loss of  
 consciousness Lymphadenopathy Malaise Melaena Memory  
 impairment Meningitis aseptic Mental disability Mental disorder  
 Migraine Mouth ulceration Muscle rigidity Muscle spasms  
 Muscular weakness Musculoskeletal discomfort Musculoskeletal  
 pain Musculoskeletal stiffness Myalgia Myocardial infarction  
 Nail disorder Nausea Neck pain Necrosis Neoplasm  
 malignant Nephritis Nephropathy Nephrotic syndrome Nervous  
 system disorder Nervousness Neuritis Neuropathy peripheral Night  
 blindness Nightmare Nocturia Nodule Nuchal rigidity  
 Ocular hyperaemia Oedema peripheral Oesophageal disorder  
 Oesophagitis Oliguria Osteoarthritis Pain  
 Palpitations Pancreatitis Pancytopenia Papule  
 Paraesthesia Peptic ulcer Pharyngitis Phlebitis  
 Photosensitivity reaction Pneumonia Pollakiuria Polyuria  
 Proctitis Prostatic specific antigen increased Protein  
 urine present Proteinuria Pruritus Psychotic disorder  
 Pulmonary function test decreased Punctate keratitis  
 Purpura Rash Rash maculo-papular Rash pustular  
 Rectal haemorrhage Renal failure acute Renal impairment  
 Renal papillary necrosis Respiratory depression Respiratory  
 disorder Rhinitis Scotoma Seborrhoeic dermatitis Sepsis  
 Shock Sinusitis Skin cancer Skin discolouration Skin  
 exfoliation Skin hypertrophy Skin irritation Skin mass Skin odour  
 abnormal Skin ulcer Sleep disorder Social avoidant behaviour  
 Somnolence Speech disorder Stevens-Johnson syndrome  
 Stomatitis Swelling Syncope Tachycardia Tension  
 Testicular disorder Thinking abnormal Thirst  
 Thrombocytopenia Tic Tinnitus Tongue coated Tooth  
 abscess Toxic epidermal necrolysis Tremor  
 Tubulointerstitial nephritis Ulcerative keratitis Urethral  
 disorder Urinary tract disorder Urine output increased Urticaria  
 Vaginal haemorrhage Vascular purpura Vasculitis  
 Vasodilation procedure Ventricular extrasystoles Vertigo  
 Viral infection Vision blurred Visual acuity reduced  
 Visual impairment Vitreous floaters Vomiting Weight decreased

\*\*\*\*\*  
\*\*\*\*\*

Amiloride-sensitive cation channel 1, neuronal - Group: Channel

Treated with:

amiloride: approved small molecule (85 associated side effects)

For use as adjunctive treatment with thiazide diuretics or other kaliuretic-diuretic agents in congestive heart failure or hypertension.

85 known side effects mediated through drugs targeting this protein:

Abdominal distension Abdominal pain Agitation Alopecia  
Anaemia Angina pectoris Aplastic anaemia Arthralgia  
Asthenia Atrioventricular block Atrioventricular block  
complete Back pain Bladder pain Bladder spasm Blood  
potassium increased Bradycardia Chest pain Coma Confusional state  
Constipation Cough Decreased appetite Dehydration  
Dermatitis Diarrhoea Disturbance in sexual arousal  
Dizziness Dry mouth Dyspepsia Dyspnoea Dysuria  
Encephalopathy Erectile dysfunction Fatigue Feeling  
abnormal Flatulence Foetor hepaticus Gastrointestinal haemorrhage  
Gastrointestinal pain Gynaecomastia Haemoglobin Haemorrhage  
Headache Hepatic encephalopathy Hepatic function abnormal  
Hepatocellular injury Hyperkinesia Hyponatraemia  
Hypotension Insomnia Intraocular pressure increased  
Jaundice Libido decreased Liver disorder Muscle spasms  
Muscular weakness Musculoskeletal discomfort Nasal congestion  
Nausea Neck pain Nervousness Neutropenia Oral pruritus  
Orthostatic hypotension Pain Pain in extremity  
Palpitations Paraesthesia Paralysis flaccid Peptic  
ulcer Pollakiuria Polyuria Pruritus Rash Shock Somnolence  
Tension Thirst Tinnitus Tremor Ulcer Urine  
output increased Vertigo Visual impairment Vomiting

\*\*\*\*\*  
\*\*\*\*\*

Adenosine A2b receptor - Group: Receptor

Treated with:

theophylline: approved small molecule (60 associated side effects) For the treatment of the symptoms and reversible airflow obstruction associated with chronic asthma and other chronic lung diseases, such as emphysema and chronic bronchitis.

adenosine: approved small molecule (32 associated side effects)

Used as an initial treatment for the termination of paroxysmal supraventricular tachycardia (PVST), including that associated with accessory bypass tracts, and is a drug of choice for terminating stable, narrow-complex supraventricular tachycardias (SVT). Also used as an adjunct to thallous chloride TI 201 myocardial perfusion scintigraphy (thallium stress test) in patients who are unable to exercise adequately, as well as an adjunct to vagal maneuvers and clinical assessment to establish a specific diagnosis of undefined, stable, narrow-complex SVT.

enprofylline: approved small molecule (0 associated side effects) Used in the management of symptoms of asthma. Also used in the treatment of peripheral vascular diseases and in the management of cerebrovascular insufficiency, sickle cell disease, and diabetic neuropathy.

defibrotide: approved biotech (0 associated side effects)  
Defibrotide is used to treat or prevent a failure of normal blood flow (occlusive venous disease, OVD) in the liver of patients who have had bone marrow transplants or received certain drugs such as oral estrogens, mercaptopurine, and many others.

83 known side effects mediated through drugs targeting this protein:  
Abdominal discomfort Abdominal pain Agitation Anaphylactic  
shock Anaphylactoid reaction Anxiety Arrhythmia Atrial  
fibrillation Atrial tachycardia Back pain Blood pressure  
increased Blood uric acid increased Bradycardia Bronchospasm  
Burning sensation Cardiac arrest Cardiac fibrillation  
Cardiac flutter Chest discomfort Chest pain Chronic  
obstructive pulmonary disease Clonic convulsion Convulsion Death  
Dermatitis Diarrhoea Disorientation Dizziness Dysgeusia  
Dyspnoea Extrasystoles Extravasation Fluid overload  
Flushing Gastrointestinal pain Gastrooesophageal reflux  
disease Grand mal convulsion Haematemesis Haemodynamic  
instability Headache Hypercalcaemia Hyperglycaemia  
Hyperhidrosis Hyperuricaemia Hyperventilation  
Hypoaesthesia Hypokalaemia Hypotension Hypoxia  
Infection Insomnia Irritability Loss of consciousness  
Nausea Nervous system disorder Nervousness Pain  
Palpitations Paraesthesia Phlebitis Poisoning  
Polyuria Pruritus Rash Rhabdomyolysis Sensory loss  
Shock Sinus tachycardia Supraventricular tachycardia Tachycardia  
Tension Throat tightness Thrombosis Torsade de pointes  
Tremor Urinary retention Urticaria Venous thrombosis  
Ventricular extrasystoles Ventricular fibrillation  
Ventricular tachycardia Vision blurred Vomiting

\*\*\*\*\*  
\*\*\*\*\*

Transporter - Group: Transporter

Treated with:

imipramine: approved small molecule (100 associated side effects)  
For the relief of symptoms of depression and as temporary adjunctive therapy in reducing enuresis in children aged 6 years and older. May also be used to manage panic disorders, with or without agoraphobia, as a second line agent in ADHD, management of eating disorders, for short-term management of acute depressive episodes in bipolar disorder and schizophrenia, and for symptomatic treatment of postherpetic neuralgia.

desipramine: approved small molecule (120 associated side effects)  
For relief of symptoms in various depressive syndromes, especially endogenous depression. It has also been used to manage chronic peripheral neuropathic pain, as a second line agent for the management of anxiety disorders (e.g. panic disorder, generalized anxiety disorder), and as a second or third line agent in the ADHD management.

clomipramine: approved small molecule (349 associated side effects)

(3r)-n-methyl-3-phenyl-3-[4-(trifluoromethyl)phenoxy]propan-1-amine:  
experimental small molecule (0 associated side effects)

(3s)-n-methyl-3-phenyl-3-[4-(trifluoromethyl)phenoxy]propan-1-amine:  
experimental small molecule (0 associated side effects)

(1s,4s)-4-(3,4-dichlorophenyl)-n-methyl-1,2,3,4-tetrahydronaphthalen-1-amine: experimental small molecule  
(0 associated side effects)

391 known side effects mediated through drugs targeting this protein:

5q minus syndrome Abdominal distension Abdominal pain Acne Acute coronary syndrome Affect lability Ageusia Aggression Agitation Agranulocytosis Albuminuria Alopecia Amenorrhoea Amyotrophic lateral sclerosis Anaemia Aneurysm Anxiety Apathy Aphasia Apraxia Arrhythmia Arthralgia Arthropathy Asthenia Ataxia Atrial flutter Atrioventricular block Back pain Bladder dilatation Bladder pain Blepharitis Blepharospasm Blindness Blood alkaline phosphatase increased Blood uric acid increased Body temperature increased Bradycardia Breast engorgement Breast enlargement Breast feeding Breast pain Breath odour Bronchitis Bronchospasm Bundle branch block Cardiac arrest Cardiac failure Cardiac failure congestive Cardiac fibrillation Cardiac flutter Cellulitis Cerebral haemorrhage Cerebrovascular accident Cervical dysplasia Cheilitis Chest pain Chills Chloasma Cholinergic syndrome Choreoathetosis Chromatopsia Colitis Coma Completed suicide Confusional state Conjunctival haemorrhage Conjunctivitis Constipation Convulsion Coordination abnormal Cough Crocodile tears syndrome Cyanosis Cystitis Cystitis noninfective Deafness Death Decreased appetite Dehydration Delirium Delusion Dental caries Dependence Depersonalisation Depressed level of consciousness Depression Dermatitis Diabetes mellitus Diarrhoea Diplopia Discomfort Disorientation Disturbance in attention Disturbance in sexual arousal Dizziness Drug dependence Dry mouth Dry skin Duodenitis Dysgeusia Dyskinesia Dysmenorrhoea Dyspepsia Dysphagia Dysphonia Dysplasia Dyspnoea Dystonia Dysuria Ear infection Ear pain Eczema Ejaculation failure Electrocardiogram abnormal Electroencephalogram abnormal Encephalopathy Endometrial hyperplasia Endometriosis Enteritis Eosinophilia Epididymitis Epistaxis Erectile dysfunction Eructation Euphoric mood Exophthalmos Exostosis Extrapyrarnidal disorder Extrasystoles Eye allergy Eye pain Faeces discoloured Fat intolerance Fatigue Feeling abnormal Fibroadenoma of breast Flat affect Flatulence Flushing Folliculitis Gait disturbance Galactorrhoea Gastric dilatation Gastric ulcer Gastritis Gastrointestinal disorder Gastrointestinal pain Gastrooesophageal reflux disease Genital discharge Gingival bleeding Gingivitis Glaucoma Glossitis Glycosuria Goitre Gout Grand mal convulsion Gravitational oedema Gynaecomastia Haematochezia Haematuria Haemoglobin Haemoptysis Haemorrhage Haemorrhoids Hallucination Headache Hemiparesis Hepatic function abnormal Hepatitis Hiccups Hostility Hot flush Hyperacusis Hyperaemia Hyperaesthesia Hypercholesterolaemia Hyperglycaemia Hyperhidrosis Hyperkinesia Hyperplasia Hyperreflexia Hypersensitivity Hypertension Hyperthyroidism Hypertonia

Hypertrichosis Hypertrophy Hyperuricaemia Hyperventilation  
 Hypnagogic hallucination Hypoaesthesia Hypokalaemia  
 Hypokinesia Hypomania Hypotension Hypothyroidism  
 Hypoventilation Hypoxia IIIrd nerve paralysis Ileus  
 paralytic Ill-defined disorder Illusion Inappropriate  
 antidiuretic hormone secretion Incontinence Increased  
 appetite Infarction Infection susceptibility increased  
 Inflammation Inner ear disorder Insomnia Intestinal  
 functional disorder Intestinal obstruction Intraocular pressure  
 increased Irritability Irritable bowel syndrome Ischaemia  
 Jaundice Keratitis Lacrimation increased Laryngitis  
 Laryngospasm Leukaemoid reaction Libido decreased Liver  
 function test abnormal Loss of consciousness Lymphadenitis  
 Lymphadenopathy Lymphoma Malaise Mania Memory impairment  
 Menopausal symptoms Menstrual disorder Mental disability  
 Mental disorder Micturition disorder Migraine Mood swings  
 Mouth ulceration Muscle spasms Muscle twitching Muscular  
 weakness Musculoskeletal discomfort Mutism Myalgia  
 Mydriasis Myocardial infarction Myocardial ischaemia  
 Myoclonus Myopathy Myositis Nausea Nephrolithiasis  
 Nervousness Neuralgia Neuroleptic malignant syndrome  
 Neuropathy peripheral Night blindness Nightmare Nocturia  
 Nodal arrhythmia Nystagmus Obstruction Oculogyric crisis  
 Oedema Oesophagitis Oliguria Orthostatic  
 hypotension Osteoarthritis Otitis media Ovarian cyst Pain  
 Pallor Palpitations Pancytopenia Panic reaction  
 Paraesthesia Paralysis Paranoia Paresis Parosmia  
 Parotid gland enlargement Peptic ulcer Perineal pain  
 Peripheral ischaemia Petechiae Pharyngeal oedema Pharyngitis  
 Phobia Photophobia Photosensitivity reaction  
 Piloerection Pneumonia Poisoning Pollakiuria  
 Polyarteritis nodosa Polyuria Premature ejaculation  
 Pressure of speech Prostatic disorder Pruritus  
 Pruritus genital Psoriasis Psychosomatic disease Psychotic  
 disorder Pupils unequal Purpura Pyelonephritis Pyuria  
 Rash Rash erythematous Rash maculo-papular Rash pustular  
 Rectal haemorrhage Renal cyst Renal pain Respiratory  
 failure Retinal disorder Rhinitis Salivary gland enlargement  
 Salivary hypersecretion Schizophreniform disorder  
 Scleritis Scotoma Seborrhoeic dermatitis Sensation of  
 foreign body Sensory disturbance Sensory loss Shock  
 Sinusitis Skin discolouration Skin hypertrophy Skin odour  
 abnormal Skin ulcer Sleep disorder Somnambulism Somnolence  
 Speech disorder Stomach dilation procedure Stomatitis  
 Strabismus Stupor Sudden death Suicidal ideation  
 Suicide attempt Swelling Syncope Systemic lupus  
 erythematous Tachycardia Tension Testicular swelling  
 Thinking abnormal Thirst Thrombocytopenia Thrombophlebitis  
 Tinnitus Tongue discolouration Tongue ulceration Tooth  
 disorder Torticollis Tremor Ulcer Urethral disorder Urinary  
 incontinence Urinary retention Urinary tract infection Urine  
 output increased Urticaria Uterine haemorrhage Uterine  
 inflammation Vaginal haemorrhage Vaginal infection Vaginal  
 inflammation Vascular purpura Vasospasm Ventricular  
 extrasystoles Ventricular fibrillation Ventricular

tachycardia Vertigo Vestibular disorder Vision blurred  
Visual acuity reduced Visual impairment Vomiting Vulval  
disorder Waxy flexibility Weight decreased Weight increased  
Withdrawal syndrome Yawning

\*\*\*\*\*  
\*\*\*\*\*

Potassium voltage-gated channel subfamily A member 4 - Group:  
Channel

Treated with:

arginineamide: experimental small molecule (0 associated  
side effects)

known side effects mediated through drugs targeting this protein:

\*\*\*\*\*  
\*\*\*\*\*

Potassium channel subfamily K member 1 - Group: Channel

Treated with:

ibutilide: approved small molecule (53 associated side effects)

Indicated for the rapid conversion of atrial fibrillation or  
atrial flutter of recent onset to sinus rhythm.

quinidine: approved small molecule (146 associated side  
effects) For the treatment of ventricular pre-excitation and  
cardiac dysrhythmias

quinidine barbiturate: approved small molecule (0 associated  
side effects)

172 known side effects mediated through drugs targeting this  
protein:

Abdominal discomfort Abdominal pain Agitation Agranulocytosis  
Anaemia Angina pectoris Angioedema Anxiety Aphasia  
Aplastic anaemia Arthralgia Asthenia Asthma Ataxia  
Atrial fibrillation Atrioventricular block first degree  
Atrioventricular block second degree Azotaemia Blindness  
Blood creatine phosphokinase increased Blood creatinine  
increased Blood urea increased Body temperature increased  
Bradycardia Bronchospasm Bundle branch block Cardiac  
arrest Cardiac failure Cardiac failure congestive Cardiac  
fibrillation Cerebral ischaemia Cerebrovascular accident  
Chest pain Chills Coagulopathy Coma Completed suicide  
Confusional state Constipation Convulsion Cutaneous  
vasculitis Deafness Decreased appetite Delirium Dermatitis  
bullous Dermatitis contact Dermatitis exfoliative Diarrhoea  
Diplopia Disorientation Disseminated intravascular  
coagulation Dizziness Drug eruption Drug interaction Dyspepsia  
Dyspnoea Dystonia Ecchymosis Electrocardiogram abnormal  
Electrocardiogram normal Erythema Erythema multiforme  
Extrasystoles Fatigue Feeling abnormal Flushing  
Gastrointestinal pain Granulomatous liver disease Haemoglobin  
decreased Haemoglobinuria Haemolytic anaemia Haemolytic  
uraemic syndrome Haemorrhage Headache Hearing impaired Hepatic  
function abnormal Hepatitis Hyperhidrosis Hypersensitivity  
Hypertension Hypocalcaemia Hypoglycaemia  
Hypokalaemia Hypomagnesaemia Hypoprothrombinaemia  
Hypotension Idiopathic thrombocytopenic purpura Ileus



Infection Insomnia Ischaemia Jaundice Leukocytosis  
 Leukopenia Liver function test abnormal Loss of consciousness  
 Lymphadenopathy Mental disorder Muscle spasms Muscular  
 weakness Musculoskeletal discomfort Myalgia Mydriasis  
 Nausea Necrosis Nephritis Nervousness Neuritis  
 Neuropathy peripheral Neutropenia Night blindness Nodal  
 arrhythmia Nodule Oedema Oesophagitis Optic neuritis  
 Orthostatic hypotension Pain Palpitations  
 Pancytopenia Petechiae Photophobia Photosensitivity  
 reaction Pigmentation disorder Plasmodium falciparum infection  
 Platelet disorder Pneumonia Pruritus Pulmonary oedema  
 Purpura Rash Renal failure Renal impairment Rhythm  
 idioventricular Scotoma Shock Sicca syndrome Sinus bradycardia  
 Sinus tachycardia Social avoidant behaviour Sudden visual  
 loss Supraventricular extrasystoles Supraventricular tachycardia  
 Syncope Systemic lupus erythematosus Tachyarrhythmia  
 Tachycardia Tension Thought blocking Thrombocytopenia  
 Thrombocytopenic purpura Thrombotic thrombocytopenic  
 purpura Tinnitus Torsade de pointes Toxic epidermal  
 necrolysis Tremor Tubulointerstitial nephritis Urinary tract  
 infection Urticaria Uveitis Vascular purpura Vascular  
 resistance systemic Vasculitis Vasodilation procedure Ventricular  
 arrhythmia Ventricular extrasystoles Ventricular fibrillation  
 Ventricular tachycardia Vertigo Vision blurred  
 Visual impairment Vomiting

\*\*\*\*\*  
 \*\*\*\*\*

Opioid receptor, sigma 1 - Group: Receptor

Treated with:

dextromethorphan: approved small molecule (0 associated side effects) For treatment and relief of dry cough.

naltrexone: approved small molecule (238 associated side effects) Used as an adjunct to a medically supervised behaviour modification program in the maintenance of opiate cessation in individuals who were formerly physically dependent on opiates and who have successfully undergone detoxification. Also used for the management of alcohol dependence in conjunction with a behavioural modification program.

238 known side effects mediated through drugs targeting this protein:

Abdominal discomfort Abdominal pain Abdominal pain lower  
 Abdominal pain upper Abnormal dreams Abortion missed  
 Abscess Acne Acute coronary syndrome Agitation  
 Alanine aminotransferase increased Alcohol withdrawal syndrome  
 Alopecia Anaphylactic shock Aneurysm Angina pectoris  
 Angina unstable Angioedema Angiopathy Anxiety Aortic  
 dissection Appetite disorder Arterial occlusive disease  
 Arteriosclerosis Arteriosclerosis coronary artery Arthralgia  
 Arthritis Aspartate aminotransferase increased Asthenia  
 Atrial fibrillation Back pain Blood creatinine normal  
 Blood pressure fluctuation Blood pressure increased Body  
 temperature increased Bronchitis Cardiac disorder Cardiac failure  
 Cardiac failure congestive Cardiac fibrillation Cellulitis  
 Cerebrovascular accident Chest discomfort Chest pain

Chills Cholecystitis Cholecystitis acute  
 Cholelithiasis Chronic obstructive pulmonary disease  
 Colitis Completed suicide Confusional state Conjunctivitis  
 Connective tissue disorder Constipation Convulsion Cough  
 Crying Cytolytic hepatitis Death Decreased appetite  
 Deep vein thrombosis Dehydration Delirium Depressed mood  
 Dermatitis Diarrhoea Discomfort Disorientation Disturbance  
 in attention Disturbance in sexual arousal Dizziness Dry  
 mouth Dysgeusia Dysphonia Dyspnoea Ecchymosis Ejaculation  
 delayed Embolism Emotional distress Energy increased  
 Eosinophilic pneumonia Epistaxis Euphoric mood Eye  
 disorder Face oedema Fatigue Feeling abnormal Flatulence  
 Flushing Frequent bowel movements Gastric disorder  
 Gastroenteritis Gastrointestinal disorder Gastrointestinal  
 haemorrhage Gastrointestinal pain Gastrointestinal tract irritation  
 Gastrooesophageal reflux disease Groin pain HIV infection  
 Haemoglobin Haemorrhage Haemorrhoids Hallucination  
 Headache Heat rash Hepatic enzyme increased Hepatic  
 function abnormal Hepatitis C Hepatobiliary disease Hepatocellular  
 injury Hot flush Hypercholesterolaemia Hyperhidrosis  
 Hyperkinesia Hypersensitivity Hypertension Idiopathic  
 thrombocytopenic purpura Ileus paralytic Ill-defined disorder  
 Immune system disorder Increased appetite Induration  
 Infarction Infection Infestation Influenza Injection site  
 haematoma Injection site haemorrhage Injection site pain  
 Injection site reaction Insomnia Intracranial aneurysm  
 Irritability Ischaemic stroke Joint stiffness Laryngitis  
 Lethargy Libido decreased Liver injury Loss of  
 consciousness Lung disorder Lymphadenitis Lymphadenopathy  
 Malaise Mediastinal disorder Menopausal symptoms  
 Mental disability Mental disorder Mental retardation  
 Migraine Muscle rigidity Muscle spasms Muscle twitching  
 Musculoskeletal discomfort Musculoskeletal stiffness  
 Myalgia Myocardial infarction Nasal congestion  
 Nasopharyngitis Nausea Nervous system disorder  
 Nervousness Night sweats Nightmare Nodule Obsessive-  
 compulsive disorder Obstructive airways disorder Oedema Oral  
 herpes Oropharyngeal discomfort Oropharyngeal pain Pain  
 Pain in extremity Palpitations Pancreatitis acute Panic  
 attack Panic reaction Paraesthesia Paranoia Peripheral  
 coldness Perirectal abscess Persistent generalised  
 lymphadenopathy Pharyngitis Pharyngitis streptococcal Phlebitis  
 Platelet count decreased Pneumonia Poor quality sleep  
 Pruritus Psychotic disorder Pulmonary embolism  
 Purpura Rash papular Respiratory tract infection  
 Retinal artery occlusion Rhinitis seasonal Rhinorrhoea  
 Seasonal allergy Seborrhoeic dermatitis Sedation Shock Sinus  
 congestion Sinus headache Sinusitis Sleep disorder  
 Sluggishness Sneezing Somnolence Suicidal ideation  
 Suicidal attempt Swelling Syncope Tachycardia Tearfulness  
 Tenderness Tension Thinking abnormal Thirst  
 Thrombocytopenic purpura Thrombosis Tinnitus Tooth  
 abscess Toothache Tremor Ulcer Upper respiratory tract  
 infection Urinary tract infection Urticaria Vascular purpura  
 Venous thrombosis Vision blurred Vomiting Weight decreased

Weight increased White blood cell count increased Withdrawal syndrome Yawning

\*\*\*\*\*  
\*\*\*\*\*

B2 bradykinin receptor - Group: Receptor

Treated with:

icatibant: approved small molecule (0 associated side effects)

Approved for use in hereditary angioedema. Investigated for use/treatment in angioedema, liver disease, and burns and burn infections.

known side effects mediated through drugs targeting this protein:

\*\*\*\*\*  
\*\*\*\*\*

Toll-like receptor 2 - Group: Receptor

Treated with:

ospa lipoprotein: approved biotech (0 associated side effects)

For prophylactic treatment of Lyme Disease

s-(dimethylarsenic)cysteine: experimental small molecule (0 associated side effects)

known side effects mediated through drugs targeting this protein:

\*\*\*\*\*  
\*\*\*\*\*

Atrial natriuretic peptide receptor A - Group: Enzyme

Treated with:

nitroprusside: approved small molecule (0 associated side effects) For immediate reduction of blood pressure of patients in hypertensive crises, reduce bleeding during surgery, and for the treatment of acute congestive heart failure

nitroglycerin: approved small molecule (59 associated side effects) For the prevention of angina

isosorbide dinitrate: approved small molecule (11 associated side effects) For the prevention of angina pectoris due to coronary artery disease.

amyl nitrite: approved small molecule (16 associated side effects) For the rapid relief of angina pectoris.

erythrityl tetranitrate: approved small molecule (0 associated side effects) For the prevention of angina.

nesiritide: approved biotech (0 associated side effects) For the intravenous treatment of patients with acutely decompensated congestive heart failure who have dyspnea at rest or with minimal activity.

61 known side effects mediated through drugs targeting this protein:

Abdominal pain Agitation Anaphylactic shock Anaphylactoid reaction Angina pectoris Angina unstable Angiopathy Aortic dissection Asthenia Burning sensation Cardiac disorder Cerebral ischaemia Cold sweat Dermatitis Dermatitis contact Dermatitis exfoliative Discomfort Dizziness Drug eruption Dyspnoea Eczema Erythema Flushing Gastrointestinal disorder Gastrointestinal pain Headache Hyperhidrosis Hypersensitivity Hypertension Hypotension Immobile

Infection Infestation Ischaemia Loss of consciousness  
Mediastinal disorder Mental disorder Methaemoglobinaemia  
Nausea Nervous system disorder Oedema Oedema  
peripheral Orthostatic hypotension Pallor Palpitations  
Paraesthesia Pharyngitis Pruritus Rash Renal failure  
acute Rhinitis Shock Skin reaction Stomatitis Syncope  
Tachycardia Vasodilation procedure Vertigo Vision blurred  
Vomiting Withdrawal hypertension

\*\*\*\*\*  
\*\*\*\*\*

Neurotensin receptor type 2 - Group: Receptor

Treated with:

levocabastine: approved small molecule (19 associated side effects) As an ophthalmic for the temporary relief of the signs and symptoms of seasonal allergic conjunctivitis. Also used as a nasal spray for allergic rhinitis.

19 known side effects mediated through drugs targeting this protein:

Asthenia Cough Dermatitis Dry mouth Dyspnoea Erythema Eye pain  
Eyelid oedema Fatigue Headache Lacrimation increased  
Nausea Ocular hyperaemia Oedema Pain Pharyngitis Rash  
Somnolence Visual impairment

\*\*\*\*\*  
\*\*\*\*\*

Poliovirus receptor - Group: Receptor

Treated with:

sphingosine: experimental small molecule (0 associated side effects)  
myristic acid: experimental small molecule (0 associated side effects)

known side effects mediated through drugs targeting this protein:

\*\*\*\*\*  
\*\*\*\*\*

Interphotoreceptor retinoid-binding protein - Group: Receptor

Treated with:

vitamin a: approved, nutraceutical small molecule (18 associated side effects) For the treatment of vitamin A deficiency.

18 known side effects mediated through drugs targeting this protein:

Agitation Anaphylactic shock Anaphylactoid reaction Angioedema  
Anxiety Death Dermatitis Diplopia Dizziness Dyspnoea  
Erythema Headache Hypersensitivity Pruritus Rash Shock  
Urticaria Wheezing

\*\*\*\*\*  
\*\*\*\*\*

Peroxisome proliferator-activated receptor gamma - Group: Receptor

Treated with:

icosapent: approved, nutraceutical small molecule (0 associated side effects) EPA can be used for lowering elevated triglycerides in those who are hyperglyceridemic. In addition, EPA may play a therapeutic role in patients with cystic fibrosis by reducing disease severity and may play a similar role in type 2 diabetics in slowing the progression of diabetic nephropathy.

troglitazone: withdrawn small molecule (32 associated side effects) For the treatment of Type II diabetes mellitus. It is used alone or in combination with a sulfonylurea, metformin, or insulin as an adjunct to diet and exercise.

mesalazine: approved small molecule (309 associated side effects) For the treatment of active ulcerative proctitis.

indomethacin: approved small molecule (164 associated side effects) For moderate to severe rheumatoid arthritis including acute flares of chronic disease, ankylosing spondylitis, osteoarthritis, acute painful shoulder (bursitis and/or tendinitis) and acute gouty arthritis.

rosiglitazone: approved small molecule (57 associated side effects) For the treatment of Type II diabetes mellitus

nateglinide: approved small molecule (32 associated side effects) For the treatment of non-insulin dependent-diabetes mellitus in conjunction with diet and exercise.

sulfasalazine: approved small molecule (114 associated side effects) For the treatment of Crohn's disease and rheumatoid arthritis as a second-line agent.

repaglinide: approved small molecule (51 associated side effects) For the treatment of non-insulin dependent-diabetes mellitus in conjunction with diet and exercise.

telmisartan: approved small molecule (174 associated side effects) Used alone or in combination with other classes of antihypertensives for the treatment of hypertension. Also used in the treatment of diabetic nephropathy in hypertensive patients with type 2 diabetes mellitus, as well as the treatment of congestive heart failure (only in patients who cannot tolerate ACE inhibitors).

balsalazide: approved small molecule (61 associated side effects) For the treatment of mildly to moderately active ulcerative colitis.

glipizide: approved small molecule (80 associated side effects)  
For use as an adjunct to diet for the control of hyperglycemia and its associated symptomatology in patients with non-insulin-dependent diabetes mellitus (NIDDM; type II), formerly known as maturity-onset diabetes, after an adequate trial of dietary therapy has proved unsatisfactory.

pioglitazone: approved small molecule (36 associated side effects) Treatment of Type II diabetes mellitus

mitiglinide: approved small molecule (0 associated side effects) For the treatment of type 2 diabetes.

bezafibrate: approved small molecule (57 associated side effects) For the treatment of primary hyperlipidaemia types IIa, IIb, III, IV and V (Fredrickson classification) corresponding to groups I, II and III of the European Atherosclerosis Society guidelines - when diet alone or improvements in lifestyle such as increased exercise or weight reduction do not lead to an adequate response. Also for the treatment of secondary hyperlipidaemias, e.g. severe hypertriglyceridemias, when sufficient improvement does not occur after correction of the underlying disorder (e.g. diabetes mellitus).

(s)-3-(4-(2-carbazol-9-yl-ethoxy)-phenyl)-2-ethoxy-propionic acid:  
experimental small molecule (0 associated side effects)

2-{5-[3-(6-benzoyl-1-propylnaphthalen-2-yloxy)propoxy]indol-1-yl}ethanoic acid: experimental      small molecule      (0 associated side effects)  
 (2s)-3-(1-{[2-(2-chlorophenyl)-5-methyl-1,3-oxazol-4-yl]methyl}-1h-indol-5-yl)-2-ethoxypropanoic acid:      experimental      small molecule      (0 associated side effects)  
 (9z,11e,13s)-13-hydroxyoctadeca-9,11-dienoic acid: experimental      small molecule      (0 associated side effects)  
 2-{5-[3-(7-propyl-3-trifluoromethylbenzo[d]isoxazol-6-yloxy)propoxy]indol-1-yl}ethanoic acid: experimental      small molecule      (0 associated side effects)  
 (4s,5e,7z,10z,13z,16z,19z)-4-hydroxydocosa-5,7,10,13,16,19-hexaenoic acid: experimental      small molecule      (0 associated side effects)  
 (5r,6e,8z,11z,14z,17z)-5-hydroxyicosa-6,8,11,14,17-pentaenoic acid: experimental      small molecule      (0 associated side effects)  
 (8e,10s,12z)-10-hydroxy-6-oxooctadeca-8,12-dienoic acid: experimental      small molecule      (0 associated side effects)  
 (8r,9z,12z)-8-hydroxy-6-oxooctadeca-9,12-dienoic acid: experimental      small molecule      (0 associated side effects)  
 (9s,10e,12z)-9-hydroxyoctadeca-10,12-dienoic acid: experimental      small molecule      (0 associated side effects)  
 difluoro(5-{2-[(5-octyl-1h-pyrrol-2-yl-kappa)methylidene]-2h-pyrrol-5-yl-kappa}pentanoato)boron:      experimental      small molecule      (0 associated side effects)  
 (2s)-2-ethoxy-3-{4-[2-(10h-phenoxazin-10-yl)ethoxy]phenyl}propanoic acid: experimental      small molecule      (0 associated side effects)  
 3-(5-methoxy-1h-indol-3-yl)propanoic acid:      experimental      small molecule      (0 associated side effects)  
 3-{5-methoxy-1-[(4-methoxyphenyl)sulfonyl]-1h-indol-3-yl}propanoic acid: experimental      small molecule      (0 associated side effects)  
 (2s)-2-(4-ethylphenoxy)-3-phenylpropanoic acid:      experimental      small molecule      (0 associated side effects)  
 2-chloro-5-nitro-n-phenylbenzamide:      experimental      small molecule      (0 associated side effects)  
 (2s)-2-(biphenyl-4-yloxy)-3-phenylpropanoic acid:      experimental      small molecule      (0 associated side effects)  
 3-[5-(2-nitropent-1-en-1-yl)furan-2-yl]benzoic acid: experimental      small molecule      (0 associated side effects)  
 2-[(2,4-dichlorobenzoyl)amino]-5-(pyrimidin-2-yloxy)benzoic acid: experimental      small molecule      (0 associated side effects)  
 (5e,14e)-11-oxoprostanoic acid: experimental      small molecule      (0 associated side effects)  
 (2s)-2-methoxy-3-{4-[2-(5-methyl-2-phenyl-1,3-oxazol-4-yl)ethoxy]-1-benzothiophen-7-yl}propanoic acid: experimental      small molecule      (0 associated side effects)  
 3-fluoro-n-[1-(4-fluorophenyl)-3-(2-thienyl)-1h-pyrazol-5-yl]benzenesulfonamide: experimental      small molecule      (0 associated side effects)  
 (2s)-2-(4-chlorophenoxy)-3-phenylpropanoic acid:      experimental      small molecule      (0 associated side effects)

495 known side effects mediated through drugs targeting this protein:

Abdominal discomfort      Abdominal distension      Abdominal pain  
                                          Abdominal pain lower      Abdominal pain upper      Abnormal dreams

Abscess      Acidosis      Acne      Acute coronary syndrome      Acute febrile neutrophilic dermatosis      Acute interstitial pneumonitis  
 Affect lability      Agranulocytosis      Alanine aminotransferase increased      Albuminuria      Alkalosis      Alopecia      Alveolitis allergic  
 Alveolitis fibrosing      Amblyopia      Amenorrhoea      Anaemia  
 Anaemia megaloblastic      Anaphylactic shock      Anaphylactoid reaction      Angina pectoris      Angioedema      Angiopathy      Anorectal discomfort      Anorectal disorder      Anuria      Anxiety      Aortic dissection      Apathy      Aplastic anaemia      Apnoea      Arrhythmia  
 Arterial disorder      Arthralgia      Arthritis      Arthropathy      Aspartate aminotransferase increased      Aspiration      Asthenia      Asthma  
 Ataxia      Atrial fibrillation      Autonomic neuropathy  
 Azoospermia      Azotaemia      Back pain      Bladder cancer      Bladder neoplasm      Bladder pain      Blindness      Blood alkaline phosphatase increased      Blood amylase increased      Blood bilirubin increased  
 Blood creatine phosphokinase increased      Blood creatinine increased      Blood disorder      Blood lactate dehydrogenase increased  
 Blood potassium increased      Blood pressure increased      Blood uric acid increased      Body temperature increased      Bone disorder  
 Bradycardia      Breast pain      Bronchiolitis      Bronchitis  
 Bronchospasm      Burning sensation      Bursitis      Candidiasis  
 Cardiac disorder      Cardiac failure      Cardiac failure congestive  
 Cardiac fibrillation      Cardiac flutter      Cardiovascular disorder      Cauda equina syndrome      Cellulitis gangrenous  
 Cerebrovascular disorder      Chest pain      Chills  
 Cholecystitis      Cholelithiasis      Cholestasis      Chromaturia  
 Coagulopathy      Colitis      Colitis ulcerative      Coma  
 Condition aggravated      Confusional state      Conjunctivitis  
 Connective tissue disorder      Constipation      Convulsion  
 Corneal deposits      Coronary artery disease      Cough      Crohn's disease  
 Crystal urine      Crystalluria      Cyanosis      Cystitis  
 Cystitis noninfective      Cytolytic hepatitis      Deafness      Death  
 Decreased appetite      Defaecation urgency      Delirium  
 Depersonalisation      Depression      Dermatitis      Dermatitis exfoliative  
 Dermatitis infected      Diabetes mellitus      Diabetic retinal oedema  
 Diarrhoea haemorrhagic      Diplopia      Discomfort      Disease progression      Disorientation      Disseminated intravascular coagulation  
 Disturbance in sexual arousal      Diverticulum      Dizziness  
 Drug eruption      Dry eye      Dry mouth      Dry skin      Duodenal ulcer  
 Dysarthria      Dyschezia      Dysgeusia      Dyskinesia      Dysmenorrhoea  
 Dyspepsia      Dysphagia      Dyspnoea      Dysuria      Ear congestion  
 Ear disorder      Ear infection      Ear pain      Eating disorder  
 Ecchymosis      Eczema      Effusion      Elderly      Electrocardiogram abnormal  
 Electrolyte imbalance      Emotional distress      Endocrine disorder  
 Enteritis      Enterocolitis      Eosinophilia  
 Eosinophilic myocarditis      Eosinophilic pneumonia  
 Epididymitis      Epilepsy      Epistaxis      Erectile dysfunction  
 Eructation      Erythema      Erythema multiforme      Erythema nodosum  
 Eye pain      Face oedema      Faecal incontinence      Faeces discoloured  
 Fasciitis      Fatigue      Feeling abnormal      Feeling hot  
 Fibrosis      Flat affect      Flatulence      Fluid retention      Flushing  
 Foetor hepaticus      Fungal infection      Gait disturbance      Gamma-glutamyltransferase decreased      Gamma-glutamyltransferase increased  
 Gastric disorder      Gastric perforation      Gastritis  
 Gastroenteritis      Gastrointestinal disorder      Gastrointestinal

haemorrhage Gastrointestinal pain Gastrointestinal tract irritation  
 Gastrooesophageal reflux disease Generalised oedema  
 Genital candidiasis Glomerulonephritis minimal lesion  
 Glossodynia Glycosuria Goitre Gout Gravitational oedema  
 Gynaecomastia Haematochezia Haematocrit decreased  
 Haematuria Haemoglobin Haemolytic anaemia Haemorrhage  
 Haemorrhage intracranial Haemorrhoids Hallucination  
 Headache Hearing impaired Hepatic cirrhosis Hepatic enzyme  
 increased Hepatic failure Hepatic function abnormal Hepatic  
 necrosis Hepatitis Hepatitis cholestatic Hepatitis fulminant  
 Hepatobiliary disease Hepatocellular injury Hirsutism  
 Hormone level abnormal Hyperaesthesia Hyperbilirubinaemia  
 Hypercholesterolaemia Hyperglycaemia Hyperhidrosis  
 Hyperkalaemia Hyperkeratosis Hypersensitivity  
 Hypertension Hypertonia Hypertrophy Hyperuricaemia  
 Hypoaesthesia Hypocalcaemia Hypoglycaemia  
 Hypokalaemia Hypomagnesaemia Hypomenorrhoea  
 Hyponatraemia Hypoprothrombinaemia Hypotension Idiopathic  
 pulmonary fibrosis Ileitis Ileus Ill-defined disorder  
 Inappropriate antidiuretic hormone secretion Incontinence  
 Increased appetite Infantile genetic agranulocytosis  
 Infarction Infection Infertility Infestation Inflammatory  
 bowel disease Influenza like illness Insomnia Intermittent  
 claudication Interstitial lung disease Intestinal obstruction  
 Intestinal ulcer Ischaemia Jaundice Jaundice cholestatic  
 Ketonuria Kidney fibrosis Laboratory test abnormal  
 Lacrimal disorder Lacrimation increased Lethargy Leukaemia  
 Leukocytosis Leukopenia Libido decreased Lichen planus  
 Lichenoid keratosis Liver disorder Liver function test  
 abnormal Liver injury Local reaction Loss of consciousness  
 Lung disorder Lung infection Lung infiltration  
 Lymphadenopathy Macular oedema Macule Malabsorption  
 Malaise Mediastinal disorder Melaena Meningitis  
 Menorrhagia Mental disorder Methaemoglobinaemia  
 Metrorrhagia Micturition disorder Micturition urgency  
 Migraine Mood swings Mouth ulceration Muscle contractions  
 involuntary Muscle spasms Muscular weakness Musculoskeletal  
 discomfort Musculoskeletal disorder Musculoskeletal pain  
 Musculoskeletal stiffness Myalgia Myelitis Myelitis  
 transverse Myelodysplastic syndrome Myocardial infarction  
 Myocardial ischaemia Myocarditis Myositis Nail disorder  
 Nasopharyngitis Nausea Neck pain Necrosis Necrotising  
 colitis Necrotising enterocolitis neonatal Necrotising fasciitis  
 Neoplasm malignant Nephritic syndrome Nephritis  
 Nephropathy Nephrotic syndrome Nervous system disorder  
 Nervousness Neuropathy peripheral Neutropenia Neutropenic  
 colitis Normal pressure hydrocephalus Obliterative  
 bronchiolitis Obstruction Oedema Oedema peripheral Oesophageal  
 disorder Oesophageal ulcer Oligohydramnios Oliguria Oral  
 candidiasis Oropharyngeal discomfort Oropharyngeal pain  
 Orthostatic hypotension Osteoarthritis Otitis media  
 Pain Pain in extremity Palpitations Pancreatitis acute  
 Pancytopenia Paraesthesia Parapsoriasis Parosmia  
 Peptic ulcer perforation Pericardial effusion  
 Pericarditis constrictive Periorbital oedema Petechiae



Pharyngitis Photosensitivity reaction Pityriasis lichenoides  
 et varioliformis acuta Plantar fasciitis Platelet aggregation  
 decreased Platelet count decreased Pleural disorder Pleural  
 effusion Pleurisy Pneumonia Pneumonia aspiration  
 Pneumothorax Pollakiuria Polyarteritis nodosa Polyp  
 Polyuria Porphyria Porphyria non-acute Proctalgia  
 Proctitis Prostatic disorder Protein urine present  
 Proteinuria Prurigo Pruritus Psoriasis Psychotic  
 disorder Pulmonary eosinophilia Pulmonary fibrosis Pulmonary  
 haemorrhage Pulmonary hypertension Pulmonary oedema Purpura  
 Pyoderma gangrenosum Rash erythematous Rash generalised Rash  
 papular Rash pustular Rectal discharge Rectal haemorrhage  
 Rectal polyp Rectal spasm Rectal tenesmus Renal  
 failure Renal failure acute Renal failure chronic Renal  
 impairment Respiratory disorder Respiratory tract infection  
 Retching Retinal haemorrhage Retinopathy of prematurity  
 Rhabdomyolysis Rheumatoid arthritis Rhinitis Rhinorrhoea  
 Sciatica Scleral hyperaemia Scotoma Serum sickness  
 Shock Sinus tachycardia Sinusitis Skin discoloration Skin  
 disorder Skin exfoliation Skin necrosis Skin ulcer Social  
 avoidant behaviour Somnolence Steatorrhoea Stomatitis  
 Syncope Systemic lupus erythematosus Tachycardia Tenderness  
 Tendon pain Tendonitis Tenosynovitis Tension Thirst  
 Thrombocytopenia Thrombocytopenic purpura Thrombocytosis  
 Thrombophlebitis Thrombosis Tinnitus Tongue discoloration  
 Tongue disorder Tongue oedema Tooth disorder Toothache  
 Toxic epidermal necrolysis Toxic skin eruption  
 Transaminases increased Tremor Tubulointerstitial  
 nephritis Ulcer Upper respiratory tract infection Urethral disorder  
 Urinary tract disorder Urinary tract infection Urine  
 abnormality Urine analysis abnormal Urine colour abnormal Urine  
 output increased Urticaria Vaginal haemorrhage Vaginal infection  
 Vaginal inflammation Vascular purpura Vasculitis  
 Vasodilation procedure Vertigo Vision blurred Visual  
 acuity reduced Visual impairment Volume blood increased Vomiting  
 Vulvovaginal candidiasis Vulvovaginal mycotic infection  
 Weight decreased Weight increased

\*\*\*\*\*  
 \*\*\*\*\*

Voltage-dependent anion-selective channel protein 3 - Group: Channel  
 Treated with:  
 dihydroxyaluminium: approved small molecule (0 associated  
 side effects)

known side effects mediated through drugs targeting this protein:

\*\*\*\*\*  
 \*\*\*\*\*

Outer membrane protein II - Group: Channel  
 Treated with:  
 lauryl dimethylamine-n-oxide: experimental small molecule  
 (0 associated side effects)

known side effects mediated through drugs targeting this protein:

\*\*\*\*\*  
\*\*\*\*\*

Toll-like receptor 9 - Group: Receptor

Treated with:

chloroquine: approved small molecule (59 associated side effects) For the suppressive treatment and for acute attacks of malaria due to *P. vivax*, *P. malariae*, *P. ovale*, and susceptible strains of *P. falciparum*, Second-line agent in treatment of Rheumatoid Arthritis

hydroxychloroquine: approved small molecule (67 associated side effects) For the suppressive treatment and treatment of acute attacks of malaria due to *Plasmodium vivax*, *P. malariae*, *P. ovale*, and susceptible strains of *P. falciparum*. It is also indicated for the treatment of discoid and systemic lupus erythematosus, and rheumatoid arthritis.

95 known side effects mediated through drugs targeting this protein:

Abdominal pain Acute generalised exanthematous pustulosis Acute hepatic failure Agitation Agranulocytosis Alopecia Anaemia Anaphylactic shock Anaphylactoid reaction Angioedema Anxiety Aplastic anaemia Asthenia Ataxia Atrophy Blindness Blood disorder Bronchospasm Cardiomyopathy Confusional state Convulsion Corneal deposits Corneal opacity Deafness Deafness neurosensory Decreased appetite Delirium Dermatitis exfoliative Diarrhoea Dizziness Electrocardiogram QRS complex Electrocardiogram change Erythema Erythema annulare Erythema multiforme Fatigue Feeling abnormal Gastrointestinal disorder Haemolysis Hallucination Halo vision Headache Hearing impaired Hepatic enzyme increased Hepatic failure Hepatic function abnormal Hepatitis Hypersensitivity Hypotension Insomnia Irritability Leukopenia Lichen planus Loss of consciousness Macule Muscle spasms Myopathy Nausea Nervousness Neuromyopathy Neutropenia Night blindness Nightmare Nystagmus Oedema Pallor Pancytopenia Paralysis Personality change Photophobia Photosensitivity reaction Pigmentation disorder Polyneuropathy Porphyria Pruritus Psoriasis Psychotic disorder Rash Rash papular Retinal disorder Retinal injury Retinal pigmentation Scotoma Skin exfoliation Tension Thrombocytopenia Tinnitus Toxic epidermal necrolysis Urticaria Vertigo Vision blurred Visual acuity reduced Visual impairment Vomiting Weight decreased

\*\*\*\*\*  
\*\*\*\*\*

Receptor-type tyrosine-protein phosphatase beta - Group: Enzyme

Treated with:

{4-[2-benzyl-3-methoxy-2-(methoxycarbonyl)-3-oxopropyl]phenyl}sulfamic acid: experimental small molecule (0 associated side effects)

(4-{4-[(tert-butoxycarbonyl)amino]-2,2-bis(ethoxycarbonyl)butyl}phenyl)sulfamic acid: experimental small molecule (0 associated side effects)

{4-[2,2-bis(5-methyl-1,2,4-oxadiazol-3-yl)-3-phenylpropyl]phenyl}sulfamic acid: experimental small molecule  
(0 associated side effects)  
(4-ethylphenyl)sulfamic acid: experimental small molecule  
(0 associated side effects)

known side effects mediated through drugs targeting this protein:

\*\*\*\*\*  
\*\*\*\*\*

Hyaluronan mediated motility receptor - Group: Receptor

Treated with:

hyaluronan: approved small molecule (0 associated side effects)

Used to treat knee pain in patients with joint inflammation (osteoarthritis). It is usually used in patients who have not responded to other treatments such as acetaminophen, exercise, or physical therapy. Sodium hyaluronate may also be used in plastic surgery to reduce wrinkles on the face or as a filler in other parts of the body. May be used in ophthalmology to assist in the extraction of cataracts, the implantation of intraocular lenses, corneal transplants, glaucoma filtration, retinal attachment and in the treatment of dry eyes. Finally, Sodium hyaluronate is also used to coat the bladder lining in treating interstitial cystitis.

known side effects mediated through drugs targeting this protein:

\*\*\*\*\*  
\*\*\*\*\*

Chloride channel protein ClC-Ka - Group: Channel

Treated with:

niflumic acid: approved small molecule (0 associated side effects) Used in the treatment of rheumatoid arthritis.

known side effects mediated through drugs targeting this protein:

\*\*\*\*\*  
\*\*\*\*\*

Ferrichrome-iron receptor - Group: Transporter

Treated with:

2-tridecanoyloxy-pentadecanoic acid: experimental small molecule (0 associated side effects)

beta-d-glucose: experimental small molecule (0 associated side effects)

n-octyl-2-hydroxyethyl sulfoxide: experimental small molecule (0 associated side effects)

decylamine-n,n-dimethyl-n-oxide: experimental small molecule (0 associated side effects)

phenylferricrocin-iron: experimental small molecule (0 associated side effects)

3-deoxy-d-glucosamine: experimental small molecule (0 associated side effects)

delta-2-albomycin a1: experimental small molecule (0 associated side effects)

3-hydroxy-myristic acid: experimental small molecule (0 associated side effects)

glucosamine 4-phosphate: experimental small molecule (0 associated side effects)  
 2-amino-vinyl-phosphate: experimental small molecule (0 associated side effects)  
 glucosamine 1-phosphate: experimental small molecule (0 associated side effects)  
 3-deoxy-d-manno-oct-2-ulosonic acid: experimental small molecule (0 associated side effects)  
 3-oxo-pentadecanoic acid: experimental small molecule (0 associated side effects)  
 diphosphate: experimental small molecule (0 associated side effects)  
 rifamycin cgp 4832: experimental small molecule (0 associated side effects)  
 1-glycero-d-manno-heptopyranose: experimental small molecule (0 associated side effects)

known side effects mediated through drugs targeting this protein:

\*\*\*\*\*  
 \*\*\*\*\*

Electrogenic sodium bicarbonate cotransporter 4 - Group: Transporter  
 Treated with:

sodium bicarbonate: approved small molecule (10 associated side effects) Sodium bicarbonate is used for the treatment of metabolic acidosis which may occur in severe renal disease, uncontrolled diabetes, circulatory insufficiency due to shock or severe dehydration, extracorporeal circulation of blood, cardiac arrest and severe primary lactic acidosis. Also is indicated in severe diarrhea which is often accompanied by a significant loss of bicarbonate. Further indicated in the treatment of certain drug intoxications, including barbiturates (where dissociation of the barbiturateprotein complex is desired), in poisoning by salicylates or methyl alcohol and in hemolytic reactions requiring alkalinization of the urine to diminish nephrotoxicity of blood pigments.

10 known side effects mediated through drugs targeting this protein:

Aggression Alkalosis Cellulitis Extravasation Hypernatraemia  
 Irritability Metabolic alkalosis Necrosis Tetany  
 Ulcer

\*\*\*\*\*  
 \*\*\*\*\*

Peroxisome proliferator-activated receptor alpha - Group: Receptor  
 Treated with:

clofibrate: approved small molecule (0 associated side effects)

For Primary Dysbetalipoproteinemia (Type III hyperlipidemia) that does not respond adequately to diet. This helps control high cholesterol and high triglyceride levels.

fenofibrate: approved small molecule (180 associated side effects) For use as adjunctive therapy to diet to reduce elevated LDL-C, Total-C, Triglycerides and Apo B, and to increase HDL-C in adult patients with primary hypercholesterolemia or mixed dyslipidemia (Fredrickson Types IIa and IIb)

gemfibrozil: approved small molecule (91 associated side effects) For treatment of adult patients with very high elevations of serum triglyceride levels (types IV and V hyperlipidemia) who are at risk of developing pancreatitis (inflammation of the pancreas) and who do not respond adequately to a strict diet.

bezafibrate: approved small molecule (57 associated side effects) For the treatment of primary hyperlipidaemia types IIa, IIb, III, IV and V (Fredrickson classification) corresponding to groups I, II and III of the European Atherosclerosis Society guidelines - when diet alone or improvements in lifestyle such as increased exercise or weight reduction do not lead to an adequate response. Also for the treatment of secondary hyperlipidaemias, e.g. severe hypertriglyceridemias, when sufficient improvement does not occur after correction of the underlying disorder (e.g. diabetes mellitus).

deoxy-bigchap: experimental small molecule (0 associated side effects)

2-methyl-2-(4-{{(4-methyl-2-[4-(trifluoromethyl)phenyl]-1,3-thiazol-5-yl}carbonyl)amino}methyl}phenoxy)propanoic acid:

experimental small molecule (0 associated side effects)

3-{5-methoxy-1-[4-methoxyphenyl)sulfonyl]-1h-indol-3-yl}propanoic acid:experimental small molecule (0 associated side effects)

(2s)-2-methoxy-3-{4-[2-(5-methyl-2-phenyl-1,3-oxazol-4-yl)ethoxy]-1-benzothiophen-7-yl}propanoic acid:experimental small molecule (0 associated side effects)

223 known side effects mediated through drugs targeting this protein:

Abdominal pain Abdominal pain upper Acne Acute coronary syndrome Alanine aminotransferase increased Alopecia Alveolitis Amblyopia Anaemia Anaphylactic shock Angina pectoris Angioedema Angiopathy Anorectal disorder Antinuclear antibody positive Anxiety Appendicitis Arrhythmia Arthralgia Arthritis Arthropathy Aspartate aminotransferase increased Assisted fertilisation Asthenia Asthma Atrial fibrillation Back pain Bacterial infection Bladder pain Blindness Blood alkaline phosphatase increased Blood bilirubin increased Blood creatine phosphokinase increased Blood creatinine increased Blood disorder Blood lactate dehydrogenase increased Blood urea increased Blood uric acid increased Body temperature increased Bronchitis Bursitis Calculus urinary Candidiasis Cardiac fibrillation Cardiovascular disorder Cataract Cerebral haemorrhage Chest pain Cholecystitis Cholelithiasis Cholestasis Colitis Confusional state Conjunctivitis Constipation Convulsion Coronary artery disease Cough Cystitis Cystitis noninfective Decreased appetite Deep vein thrombosis Dermatitis contact Dermatitis exfoliative Diarrhoea Discomfort Disturbance in sexual arousal Dizziness Drug interaction Dry mouth Duodenal ulcer Dysgeusia Dyspepsia Dysplasia Dyspnoea Dysuria Ear infection Ear pain Ecchymosis Eczema Electrocardiogram abnormal Embolism Eosinophilia Erectile dysfunction Eructation Erythema Extrasystoles Eye disorder Fatigue Feeling abnormal Flatulence Fungal skin infection Gamma-glutamyltransferase increased Gastritis

Gastroenteritis Gastrointestinal disorder Gastrointestinal  
 pain Gout Gynaecomastia HaemoglobinHaemolysis Haemorrhage  
 Haptoglobin decreased Headache Hepatic cirrhosisHepatic  
 function abnormalHepatic neoplasm malignant Hepatic steatosis  
 Hepatitis Hernia Herpes simplex Herpes virus infection  
 Herpes zoster Hyperhidrosis Hypersensitivity Hypertonia  
 Hyperuricaemia Hypoaesthesia Hypoglycaemia Hypotension  
 Ill-defined disorder Increased appetite Infarction  
 Infection Infertility male Influenza Insomnia Jaundice  
 Jaundice cholestatic Laboratory test abnormal Laryngeal  
 oedema Laryngitis Leukopenia Libido decreased Liver function  
 test abnormal Loss of consciousness Lupus-like syndrome  
 Lymphadenopathy Malaise Migraine Multiple hereditary  
 exostosis Muscle spasms Muscular weaknessMusculoskeletal  
 discomfort Myalgia Myocardial infarction Myopathy Myositis  
 Nail disorder Nasopharyngitis Nausea Nervousness  
 Neuralgia Neuritis Neuropathy peripheral Oedema  
 Oedema peripheralOesophagitis Osteoarthritis Otitis  
 media Pain Palpitations Pancytopenia Paraesthesia  
 Peptic ulcer Peripheral vascular disorder Pharyngitis  
 Phlebitis Photosensitivity reaction Pneumonia Pollakiuria  
 Prostatic disorder Pruritus Pulmonary embolism  
 Purpura Rash Rash maculo-papular Rectal haemorrhage  
 Refraction disorder Renal failure Renal failure acute  
 Renal impairment Respiratory disorder Retinal oedema  
 Rhabdomyolysis Rhinitis Shock Sinusitis Skin disorder  
 Skin ulcer Social avoidant behaviour Somnolence Syncope  
 Synovitis Systemic lupus erythematosus Tachycardia  
 Tenosynovitis Tension Thrombocytopenia Thrombosis Tooth  
 disorder Toxic epidermal necrolysis Transaminases increased  
 Ulcer Unintended pregnancy Urethral disorderUrinary tract  
 disorder Urinary tract infection Urticaria Varicose vein  
 Vascular purpura Vasculitis Vasodilation procedure Venous  
 thrombosis Ventricular extrasystoles Vertigo Vision blurred  
 Visual acuity reduced Visual impairmentVomiting  
 Vulvovaginal candidiasis Vulvovaginal mycotic infection  
 Weight increased

\*\*\*\*\*  
 \*\*\*\*\*

Voltage-gated potassium channel - Group: Channel

Treated with:

tetrabutylammonium ion: experimental small molecule (0  
 associated side effects)  
 (2s)-2-(butyryloxy)-3-hydroxypropyl nonanoate: experimental  
 small molecule (0 associated side effects)

known side effects mediated through drugs targeting this protein:

\*\*\*\*\*  
 \*\*\*\*\*

Kappa-type opioid receptor - Group: Receptor

Treated with:

tramadol: approved small molecule (490 associated side  
 effects) Indicated in the treatment of moderate to severe pain.  
 Consider for those prone to constipation or respiratory depression.

Tramadol is used to treat postoperative, dental, cancer, and acute musculoskeletal pain and as an adjuvant to NSAID therapy in patients with osteoarthritis.

morphine: approved small molecule (208 associated side effects) For the relief and treatment of severe pain.

codeine: illicit,approved small molecule (43 associated side effects) For treatment and management of pain (Systemic), also used as an Antidiarrheal and as a cough suppressant.

amitriptyline: approved small molecule (109 associated side effects) For the treatment of depression, chronic pain, irritable bowel syndrome, sleep disorders, diabetic neuropathy, agitation and insomnia, and migraine prophylaxis.

hydromorphone: illicit,approved small molecule (355 associated side effects) For the relief of moderate to severe pain such as that due to surgery, cancer, trauma/injury, or burns.

mirtazapine: approved small molecule (272 associated side effects) For the treatment of major depressive disorder.

meperidine: approved small molecule (50 associated side effects) Used to control moderate to severe pain.

oxycodone: illicit,approved small molecule (215 associated side effects) For the treatment of diarrhoea, pulmonary oedema and for the relief of moderate to moderately severe pain.

butorphanol: illicit,approved small molecule (122 associated side effects) For the relief of moderate to severe pain.

propoxyphene: illicit,approved small molecule (79 associated side effects) For the relief of mild to moderate pain

pentazocine: approved small molecule (51 associated side effects) For the relief of moderate to severe pain.

naltrexone: approved small molecule (238 associated side effects) Used as an adjunct to a medically supervised behaviour modification program in the maintenance of opiate cessation in individuals who were formerly physically dependent on opiates and who have successfully undergone detoxification. Also used for the management of alcohol dependence in conjunction with a behavioural modification program.

sufentanil: approved small molecule (38 associated side effects) Used as an analgesic adjunct in anesthesia and as a primary anesthetic drug in procedures requiring assisted ventilation and in the relief of pain.

fentanyl: illicit,approved small molecule (393 associated side effects) For the treatment of cancer patients with severe pain that breaks through their regular narcotic therapy.

menthol: approved small molecule (0 associated side effects) Used to treat occasional minor irritation, pain, sore mouth, and sore throat as well as cough associated with a cold or inhaled irritants.

loperamide: approved small molecule (41 associated side effects) For the control and symptomatic relief of acute nonspecific diarrhea and of chronic diarrhea associated with inflammatory bowel disease or gastroenteritis. Also used for reducing the volume of discharge from ileostomies.

nalbuphine: approved small molecule (68 associated side effects) For the relief of moderate to severe pain.

levorphanol: approved small molecule (0 associated side effects) For the management of moderate to severe pain or as a preoperative medication where an opioid analgesic is appropriate

remifentanyl: approved small molecule (134 associated side effects) For use during the induction and maintenance of general anaesthesia.

buprenorphine: illicit,approved small molecule (170 associated side effects) For the treatment of moderate to severe pain, peri-operative analgesia, and opioid dependence.

naloxone: approved small molecule (54 associated side effects) For the complete or partial reversal of narcotic depression, including respiratory depression, induced by opioids including natural and synthetic narcotics, propoxyphene, methadone and the narcotic-antagonist analgesics: nalbuphine, pentazocine and butorphanol.

dezocine: approved small molecule (0 associated side effects) Indicated in the treatment of moderate to severe pain.

3-methylthiofentanyl: illicit,experimental small molecule (0 associated side effects)

heroin: illicit,experimental small molecule (0 associated side effects) Used in the treatment of acute pain, myocardial infarction, acute pulmonary oedema, and chronic pain.

etorphine: illicit,experimental small molecule (0 associated side effects)

carfentanil: illicit,experimental small molecule (0 associated side effects) Carfentanil is similar (but more potent) to the opioid analgesic fentanyl. It is used as a tranquilizer for large animals.

diprenorphine: illicit,experimental small molecule (0 associated side effects) Diprenorphine is used to reverse the effects of the super-potent opioid analgesics such as etorphine and carfentanil that are used for tranquilizing large animals in veterinary medicine. Not used in humans.

dihydromorphine: illicit,experimental small molecule (0 associated side effects) Dihydromorphine is an opioid analgesic used for moderate to severe pain relief.

3-methylfentanyl:illicit,experimental small molecule (0 associated side effects)

alvimopan: approved small molecule (12 associated side effects) Used to accelerate the time to upper and lower gastrointestinal recovery following partial large or small bowel resection surgery with primary anastomosis. Also investigated for use in the treatment of pain (acute or chronic).

859 known side effects mediated through drugs targeting this protein:

Abdominal discomfort Abdominal distension Abdominal pain lower  
 Abdominal pain upper Abdominal tenderness Abnormal  
 behaviour Abnormal dreams Abnormal faeces Abortion missed  
 Abscess Accommodation disorder Acidosis Acne Acute  
 abdomen Acute coronary syndrome Acute myocardial infarction  
 Adrenal insufficiency Affect lability Ageusia Aggression  
 Agitation Agranulocytosis Akathisia Alanine  
 aminotransferase decreased Alanine aminotransferase increased  
 Albuminuria Alcohol abuse Alcohol poisoningAlcohol



withdrawal syndrome    Alcoholism    Alopecia    Altered state of  
consciousness    Amblyopia    Amenorrhoea    Amnesia    Amyotrophic  
lateral sclerosis    Anaemia    Anal fissure    Analgesic therapy  
Anaphylactic shock    Anaphylactoid reaction    Aneurysm  
Angina pectoris    Angina unstable    Angioedema    Angiopathy  
Anogenital dysplasia    Anorectal disorder    Anorgasmia  
Anosmia    Antinuclear antibody positive    Anxiety  
Aortic aneurysm    Aortic dissection    Apathy    Aphasia  
Apthous stomatitis    Aplastic anaemia    Apnoea  
Appendicitis    Appetite disorder    Application site reaction  
Arrhythmia    Arrhythmia supraventricular    Arterial occlusive  
disease    Arteriosclerosis    Arteriosclerosis coronary artery  
Arthralgia    Arthritis    Arthropathy    Ascites    Aspartate  
aminotransferase increased    Asphyxia    Asthenia    Asthma  
Ataxia    Atelectasis    Atrial fibrillation    Atrial flutter  
Atrioventricular block    Atrioventricular block complete  
Atrioventricular block first degree    Atrioventricular block  
second degree    Atrophy    Azotaemia    Back disorder    Back pain  
Bacterial infection    Balance disorder    Bedridden    Benign  
breast neoplasm    Bezoar    Biliary colic    Biliary tract disorder  
Bipolar I disorder    Bipolar disorder    Bladder pain  
Bladder spasm    Bleeding time prolonged    Blepharitis  
Blindness    Blister    Blood acid phosphatase increased    Blood  
alkaline phosphatase increased    Blood amylase increased    Blood  
bilirubin increased    Blood cholesterol increased    Blood creatine  
phosphokinase increased    Blood creatinine increased    Blood  
creatinine normal    Blood glucose abnormal    Blood glucose increased  
Blood lactate dehydrogenase increased    Blood potassium  
abnormal    Blood potassium decreased    Blood potassium increased  
Blood pressure fluctuation    Blood pressure increased    Blood  
sodium increased    Blood testosterone decreased    Blood triglycerides  
increased    Blood urea increased    Blood uric acid increased    Body  
temperature decreased    Body temperature increased    Bone disorder  
Bone pain    Bradycardia    Brain cancer metastatic    Breast  
cancer    Breast disorder    Breast engorgement    Breast  
enlargement    Breast neoplasm    Breast pain    Breath odour    Breath  
sounds abnormal    Bronchitis    Bronchospasm    Burning sensation  
Bursitis    Cachexia    Cancer in remission    Cancer pain  
Candidiasis    Carbon dioxide increased    Cardiac arrest  
Cardiac disorder    Cardiac failure    Cardiac failure congestive  
Cardiac fibrillation    Cardiac flutter    Cardiac murmur  
Cardiac output decreased    Cardio-respiratory arrest  
Cardiomegaly    Cardiomyopathy    Cardiovascular disorder  
Carpal tunnel syndrome    Cataract    Cellulitis    Cerebral artery  
embolism    Cerebral infarction    Cerebral ischaemia  
Cerebrovascular accident    Cerumen impaction    Change of bowel  
habit    Cheilitis    Chest discomfort    Chest pain    Chills    Choking  
Cholangitis    Cholecystitis    Cholecystitis acute  
Cholelithiasis    Cholestasis    Chronic obstructive pulmonary  
disease    Clonic convulsion    Clonus    Coagulopathy    Cognitive  
disorder    Cold sweat    Colitis    Colitis ulcerative    Coma  
Completed suicide    Compression fracture    Confusional state  
Conjunctivitis    Connective tissue disorder    Constipation  
Convulsion    Coordination abnormal    Cough    Cough decreased  
Crying    Crystal urine    Crystalluria    Cyanosis

Cystitis Cystitis noninfective Cytolytic hepatitis  
 Deafness Deafness permanent Deafness transitory Death  
 Decreased appetite Decubitus ulcer Deep vein thrombosis  
 Deficiency anaemia Dehydration Delirium Delusion  
 Dementia Dental caries Dependence Depersonalisation  
 Depressed level of consciousness Depressed mood Depression  
 Derealisation Dermal cyst Dermatitis atopic Dermatitis  
 bullous Dermatitis contact Dermatitis exfoliative Dermoid  
 cyst Diabetes mellitus Diarrhoea Diplopia Discomfort  
 Disorientation Disturbance in attention Disturbance in  
 sexual arousal Diverticulitis Diverticulum Dizziness Drug  
 abuse Drug dependence Drug hypersensitivity Drug interaction Drug  
 tolerance Drug withdrawal syndrome Drug withdrawal syndrome  
 neonatal Dry eye Dry mouth Dry skin Dry throat Duodenitis  
 Dysarthria Dyschezia Dysgeusia Dyskinesia Dysmenorrhoea  
 Dyspepsia Dysphagia Dysphonia Dysphoria Dyspnoea  
 Dyspnoea exertional Dystonia Dysuria Ear congestion  
 Ear discomfort Ear disorder Ear infection Ear pain  
 Early satiety Ecchymosis Eczema Effusion Ejaculation  
 delayed Ejaculation disorder Electrocardiogram QT prolonged  
 Electrocardiogram ST segment depression Electrocardiogram  
 abnormal Electrocardiogram change Electrolyte imbalance  
 Embolism Emotional disorder Emotional distress  
 Encephalopathy Endocarditis Endocrine disorder  
 Endometrial sarcoma Energy increased Enterocolitis  
 Eosinophil count increased Eosinophilia Eosinophilic  
 pneumonia Epistaxis Erectile dysfunction Eructation Erysipelas  
 Erythema Erythema multiforme Euphoric mood Eustachian  
 tube disorder Exostosis Extrapyrarnidal disorder  
 Extrasystoles Eye disorder Eye haemorrhage Eye pain  
 Eye swelling Eyelid disorder Eyelid ptosis Face oedema  
 Faecal incontinence Faecalith Faecaloma Faeces  
 discoloured Fasciitis Fasting Fatigue Fear Feeling abnormal  
 Feeling cold Feeling drunk Feeling hot Feeling jittery  
 Feeling of body temperature change Flank pain Flat affect  
 Flatulence Fluid retention Flushing Frequent bowel  
 movements Fungal infection Gait disturbance Galactorrhoea  
 Gamma-glutamyltransferase increased Gastric atony  
 Gastric disorder Gastritis Gastroenteritis Gastrointestinal  
 disorder Gastrointestinal haemorrhage Gastrointestinal infection  
 Gastrointestinal motility disorder Gastrointestinal pain  
 Gastrointestinal tract irritation Gastrooesophageal reflux  
 disease Generalised oedema Genital discharge Gingival bleeding  
 Gingival pain Gingival ulceration Gingivitis Glaucoma  
 Glossitis Glossodynia Goitre Gout Grand mal convulsion  
 Granuloma Groin pain Gynaecomastia HIV infection  
 Haematemesis Haematochezia Haematocrit decreased  
 Haematocrit increased Haematoma Haematuria Haemoglobin  
 decreased Haemoglobin increased Haemolytic anaemia Haemoptysis  
 Haemorrhage Haemorrhoids Hair disorder Hallucination  
 Hangover Headache Hearing impaired Heat rash  
 Helicobacter infection Hemiplegia Hepatic cirrhosis Hepatic  
 enzyme increased Hepatic failure Hepatic function abnormal  
 Hepatic steatosis Hepatitis Hepatitis C Hepatobiliary disease  
 Hepatocellular injury Hepatomegaly Hepatorenal syndrome

Hernia            Herpes simplex    Herpes virus infection    Herpes  
 zoster            Hiccups            High density lipoprotein decreased    Hordeolum  
 Hormone level abnormal    Hostility    Hot flush    Hydronephrosis  
 Hyperacusis    Hyperaemia    Hyperaesthesia    Hypercalcaemia  
 Hypercalciuria    Hypercapnia    Hypercholesterolaemia  
 Hyperglycaemia    Hyperhidrosis    Hyperkalaemia  
 Hyperkeratosis    Hyperkinesia    Hyperlipidaemia    Hyperpathia  
 Hyperpyrexia    Hyperreflexia    Hypersensitivity  
 Hypertension    Hypertonia    Hypertriglyceridaemia    Hypertrophy  
 Hyperuricaemia    Hyperventilation    Hypoaesthesia  
 Hypoalbuminaemia    Hypocalcaemia    Hypoglycaemia  
 Hypogonadism    Hypokalaemia    Hypokinesia    Hypomagnesaemia  
 Hypomania    Hyponatraemia    Hypophosphataemia    Hypopnoea  
 Hypoproteinaemia    Hyporeflexia    Hypotension    Hypothermia  
 Hypothyroidism    Hypotonia    Hypoventilation    Hypovolaemia  
 Hypovolaemic shock    Hypoxia    Idiopathic thrombocytopenic  
 purpura    Ileus paralytic    Ill-defined disorder    Immune system  
 disorder    Impaired gastric emptying    Impaired healing  
           Inappropriate antidiuretic hormone secretion    Incontinence  
           Increased appetite    Increased bronchial secretion  
           Induration    Infarction    Infection    Infestation    Inflammation  
           Influenza    Influenza like illness    Infusion site reaction  
           Ingrowing nail    Injection site haematoma    Injection site  
 haemorrhage    Injection site pain    Injection site reaction  
           Injection site urticaria    Insomnia    Interstitial lung  
 disease    Intestinal functional disorder    Intestinal obstruction  
           Intestinal perforation    Intra-uterine death    Intracranial  
 aneurysm    Intracranial pressure increased    Intraocular pressure  
 increased    Iron deficiency    Iron deficiency anaemia  
           Irritability    Irritable bowel syndrome    Ischaemia  
           Ischaemic stroke    Jaundice    Jaundice cholestatic    Joint  
 crepitation    Joint stiffness    Joint swelling    Keratitis  
           Labyrinthitis    Lacrimal disorder    Lacrimation increased    Large  
 intestinal haemorrhage    Large intestine perforation    Laryngeal oedema  
           Laryngitis    Laryngospasm    Left ventricular failure  
           Leiomyoma    Lethargy    Leukocytosis    Leukopenia    Libido  
 decreased    Libido increased    Light anaesthesia    Lip blister    Lip pain  
           Lip ulceration    Liver function test abnormal    Liver injury  
           Liver tenderness    Localised infection    Loss of consciousness  
           Low density lipoprotein increased    Lung disorder  
           Lymphadenitis    Lymphadenopathy    Lymphocyte count decreased  
           Lymphocyte count increased    Lymphocytosis    Lymphoedema  
           Lymphoma    Lymphopenia    Major depression    Malaise    Mammogram  
 abnormal    Mania    Mediastinal disorder    Megacolon    Melaena  
           Memory impairment    Menometrorrhagia    Menopausal symptoms  
           Menopause    Menorrhagia    Menstrual disorder    Menstruation  
 irregular    Mental disability    Mental disorder    Mental retardation  
           Mental status changes    Metabolic acidosis    Metastases to  
 central nervous system    Metastasis    Metrorrhagia    Micturition  
 disorder    Micturition urgency    Migraine    Miosis    Monocyte  
 count increased    Mood swings    Mouth ulceration    Mucosal inflammation  
           Mucous membrane disorder    Muscle contractions involuntary  
           Muscle relaxant therapy    Muscle rigidity    Muscle spasms  
           Muscle spasticity    Muscle twitching    Muscular weakness  
           Musculoskeletal chest pain    Musculoskeletal discomfort

Musculoskeletal disorder      Musculoskeletal pain  
Musculoskeletal stiffness      Myalgia      Mydriasis      Myocardial  
infarction Myocardial ischaemia      Myoclonus      Myopathy      Myositis  
Nasal congestion      Nasal discomfort      Nasal oedema  
Nasopharyngitis      Nausea      Neck pain      Necrosis      Neoplasm  
Neoplasm malignant      Nephrolithiasis      Nervous system  
disorder      Nervousness      Neuralgia      Neuroleptic malignant syndrome  
Neuropathy peripheral      Neurosis      Neutropenia      Neutrophil count  
decreased      Neutrophil count increased      Night sweats      Nightmare  
Nocturia      Nodule      Nuchal rigidity      Nystagmus      Obsessive-  
compulsive disorder      Obstruction      Obstructive airways disorder  
Oculogyric crisis      Oedema peripheral      Oesophageal disorder  
Oesophageal stenosis      Oesophagitis      Oliguria      Oral  
candidiasis      Oral herpes      Oral pain      Oropharyngeal discomfort  
Oropharyngeal pain      Orthostatic hypotension  
Osteoarthritis      Osteopenia      Osteoporosis      Osteoporotic  
fracture      Otitis externa      Otitis media      Oxygen saturation  
decreased      Pain in extremity      Pallor      Palpitations  
Pancreatitis      Pancreatitis acute      Pancytopenia      Panic  
attack      Panic reaction      Papule      Paraesthesia      Paralysis  
Paranoia      Paresis      Parosmia      Parotid gland enlargement  
Pathological fracture      Pelvic pain      Pericarditis      Peripheral  
coldness      Peripheral ischaemia      Peripheral vascular disorder  
Perirectal abscess      Peroneal nerve palsy      Persistent  
generalised lymphadenopathy      Personality disorder      Petechiae  
Pharyngitis      Pharyngitis streptococcal      Phlebitis      Photophobia  
Photopsia      Photosensitivity reaction      Piloerection  
Plantar fasciitis      Platelet count decreased      Pleural disorder  
Pleural effusion      Pneumonia      Pneumothorax      Poisoning  
Pollakiuria      Polyp      Polyuria      Poor peripheral circulation      Poor  
quality sleep      Post procedural complication      Post procedural  
haemorrhage      Post procedural infection      Premenstrual syndrome  
Presyncope      Procedural pain      Proctalgia      Productive cough  
Prolonged labour      Prostatic disorder      Prostatitis  
Prostatomegaly      Protein total decreased      Protein urine  
present      Proteinuria      Prurigo      Pruritus      Pruritus generalised  
Pruritus genital      Pseudolymphoma      Psychomotor retardation  
Psychotic disorder      Pulmonary congestion      Pulmonary  
embolism      Pulmonary function test decreased      Pulmonary oedema  
Purpura      Pyelonephritis      Rales      Rash      Rash erythematous      Rash  
maculo-papular      Rash papular      Rash pustular      Rectal  
haemorrhage      Rectal prolapse      Red blood cell count decreased      Red  
blood cell count increased      Red blood cell sedimentation rate  
increased      Reflux oesophagitis      Regurgitation      Renal failure  
Renal impairment      Renal pain      Respiration abnormal      Respiratory  
acidosis      Respiratory arrest      Respiratory depression      Respiratory  
disorder      Respiratory distress      Respiratory failure      Respiratory  
rate decreased      Respiratory tract congestion      Respiratory tract  
infection viral      Retching      Retinal artery occlusion      Rheumatoid  
arthritis      Rhinalgia      Rhinitis      Rhinitis allergic      Rhinitis seasonal  
Rhinorrhoea      Rhonchi      Rosacea      Salivary gland enlargement  
Salivary hypersecretion      Scleral haemorrhage      Scrotal  
oedema      Seasonal allergy      Seborrhoeic dermatitis      Sedation  
Sensory loss      Sepsis      Sexual dysfunction      Shock      Sinus  
congestion      Sinus headache      Sinus tachycardia      Sinusitis      Skin

discolouration Skin disorder Skin hyperpigmentation Skin  
 hypertrophy Skin lesion Skin reaction Skin ulcer Sleep apnoea  
 syndrome Sleep disorder Sluggishness Small intestinal  
 obstruction Sneezing Somnolence Speech disorder Sputum increased  
 Sticky skin Stomatitis Strabismus Stridor Stupor  
 Subdural haematoma Suicidal ideation Suicide attempt  
 Supraventricular tachycardia Swelling Syncope Synovial  
 cyst Synovitis Systemic lupus erythematosus Tachycardia Tardive  
 dyskinesia Tearfulness Tenderness Tendon disorder Tendonitis  
 Tenosynovitis Tension Testicular swelling Thinking  
 abnormal Thirst Thought blocking Throat irritation Throat  
 tightness Thrombocytopenia Thrombocytopenic purpura  
 Thrombocytosis Thrombophlebitis Thrombosis Thyroid neoplasm  
 Tinea pedis Tinnitus Tongue discolouration Tongue disorder  
 Tongue oedema Tooth abscess Tooth disorder Tooth  
 impacted Tooth infection Tooth loss Toothache Torsade de  
 pointes Toxic epidermal necrolysis Tracheitis Tremor  
 Tumour invasion Ulcer Upper respiratory tract infection  
 Upper-airway cough syndrome Urethral disorder Urethritis  
 Urinary hesitation Urinary incontinence Urinary retention  
 Urinary tract disorder Urinary tract infection Urine  
 abnormality Urine analysis abnormal Urine output increased  
 Urogenital disorder Urticaria Uterine leiomyoma  
 Uterovaginal prolapse VIIth nerve paralysis Vaginal cyst  
 Vaginal discharge Vaginal haemorrhage Vaginal infection  
 Vaginal inflammation Vascular headache Vascular insufficiency  
 Vascular purpura Vasodilation procedure Venous thrombosis  
 Ventricular arrhythmia Ventricular extrasystoles Ventricular  
 fibrillation Ventricular tachycardia Vertigo Viral  
 diarrhoea Viral infection Vision blurred Visual acuity reduced  
 Visual impairment Vomiting Weight decreased Weight increased  
 Wheezing White blood cell count increased Withdrawal  
 syndrome Wound haemorrhage Wound infection Yawning

\*\*\*\*\*  
 \*\*\*\*\*

Voltage-dependent anion-selective channel protein 2 - Group: Channel  
 Treated with:  
 dihydroxyaluminium: approved small molecule (0 associated  
 side effects)

known side effects mediated through drugs targeting this protein:

\*\*\*\*\*  
 \*\*\*\*\*

Glutamate receptor delta-1 subunit - Group: Channel  
 Treated with:  
 l-glutamic acid: approved, nutraceutical small molecule (0  
 associated side effects) Considered to be nature's "Brain food"  
 by improving mental capacities; helps speed the healing of ulcers;  
 gives a "lift" from fatigue; helps control alcoholism, schizophrenia  
 and the craving for sugar.

known side effects mediated through drugs targeting this protein:

\*\*\*\*\*  
\*\*\*\*\*

Sodium-dependent dopamine transporter - Group: Transporter

Treated with:

amphetamine: illicit, approved small molecule (95 associated side effects) For treatment of Attention Deficit Disorder with Hyperactivity (ADDH) and narcolepsy in children.

phentermine: illicit, approved small molecule (21 associated side effects) For the treatment and management of obesity.

benzatropine: approved small molecule (0 associated side effects) For use as an adjunct in the therapy of all forms of parkinsonism and also for use in the control of extrapyramidal disorders due to neuroleptic drugs.

venlafaxine: approved small molecule (507 associated side effects) For the management of major depressive disorder (MDD), generalized anxiety disorder (GAD), social anxiety disorder (social phobia), panic disorder with or without agoraphobia, and vasomotor symptoms in women with breast cancer and in postmenopausal women.

methylphenidate: approved small molecule (262 associated side effects) For use as an integral part of a total treatment program which typically includes other remedial measures (psychological, educational, social) for a stabilizing effect in children with a behavioral syndrome characterized by the following group of developmentally inappropriate symptoms: moderate-to-severe distractibility, short attention span, hyperactivity, emotional lability, and impulsivity.

duloxetine: approved small molecule (269 associated side effects) For the acute and maintenance treatment of major depressive disorder (MDD), as well as acute management of generalized anxiety disorder. Also used for the management of neuropathic pain associated with diabetic peripheral neuropathy, and fibromyalgia. Has been used in the management of moderate to severe stress urinary incontinence (SUI) in women.

mazindol: approved small molecule (0 associated side effects)  
Used in short-term (a few weeks) treatment of exogenous obesity in conjunction with a regimen of weight reduction based on caloric restriction, exercise, and behavior modification in patients with a body mass index of 30 kg of body weight per height in meters squared (kg/m<sup>2</sup>) or in patients with a body mass index of 27 kg/m<sup>2</sup>; in the presence of risk factors such as hypertension, diabetes, or hyperlipidemia.

procaine: approved small molecule (43 associated side effects)

Used as a local anesthetic primarily in oral surgery

trimipramine: approved small molecule (0 associated side effects) For the treatment of depression and depression accompanied by anxiety, agitation or sleep disturbance

modafinil: approved small molecule (170 associated side effects) To improve wakefulness in patients with excessive daytime sleepiness (EDS) associated with narcolepsy.

phenmetrazine: illicit, approved small molecule (0 associated side effects) Used as an anorectic in the treatment of obesity.

pseudoephedrine: approved small molecule (0 associated side effects) For the treatment of nasal congestion, sinus congestion, Eustachian tube congestion, and vasomotor rhinitis, and as an adjunct to other agents in the optimum treatment of allergic

rhinitis, croup, sinusitis, otitis media, and tracheobronchitis. Also used as first-line therapy of priapism.

benzphetamine: illicit,approved small molecule (0 associated side effects) For the management of exogenous obesity as a short term adjunct (a few weeks) in a regimen of weight reduction based on caloric restriction

cocaine: illicit,approved small molecule (13 associated side effects) For the introduction of local (topical) anesthesia of accessible mucous membranes of the oral, laryngeal and nasal cavities.

diethylpropion: illicit,approved small molecule (62 associated side effects) Used in the management of exogenous obesity as a short-term adjunct (a few weeks) in a regimen of weight reduction based on caloric restriction.

dopamine: approved small molecule (23 associated side effects) For the correction of hemodynamic imbalances present in the shock syndrome due to myocardial infarction, trauma, endotoxic septicemia, open-heart surgery, renal failure, and chronic cardiac decompensation as in congestive failure

sertraline: approved small molecule (319 associated side effects) For the management of major depressive disorder, posttraumatic stress disorder, obsessive-compulsive disorder, panic disorder with or without agoraphobia, premenstrual dysphoric disorder, social phobia, premature ejaculation, and vascular headaches.

sibutramine: illicit,approved,withdrawn small molecule (80 associated side effects) For the treatment of obesity.

chlorpheniramine: approved small molecule (47 associated side effects) For the treatment of rhinitis, urticaria, allergy, common cold, asthma and hay fever.

diphenylpyraline: approved small molecule (0 associated side effects) For use in the treatment of allergic rhinitis, hay fever, and allergic skin disorders.

nefazodone: approved,withdrawn small molecule (246 associated side effects) For the treatment of depression.

bupropion: approved small molecule (441 associated side effects) For the treatment of depression and as aid to smoking cessation.

chloroprocaine: approved small molecule (34 associated side effects) For the production of local anesthesia by infiltration and peripheral nerve block. They are not to be used for lumbar or caudal epidural anesthesia.

escitalopram: approved small molecule (0 associated side effects) Labeled indications include major depressive disorder (MDD) and generalized anxiety disorder (GAD). Unlabeled indications include treatment of mild dementia-associated agitation in nonpsychotic patients.

lisdexamfetamine: approved small molecule (0 associated side effects) For the treatment of Attention Deficit/Hyperactivity Disorder (ADHD) in pediatric populations aged 6 to 12 years.

ephedra: approved,withdrawn,nutraceutical small molecule (0 associated side effects) Ephedra is widely used by athletes, despite a lack of evidence that it enhances athletic performance. Ephedra has also been used for weight loss.

mmda: illicit,experimental small molecule (0 associated side effects) MDMA is a recreational drug. It has no current medical uses and is a Schedule I controlled substance in the USA at present.

3,4-methylenedioxymethamphetamine: illicit,experimental small molecule (0 associated side effects) Clinical trials are now testing the therapeutic potential of MDMA for post-traumatic stress disorder (PTSD) and anxiety associated with terminal cancer. MDMA is one of the four most widely used illicit drugs in the U.S.

fencamfamine: illicit,approved,withdrawn small molecule (0 associated side effects) For the the treatment of depressive fatigue in convalescence and other debilitated states as well as in the treatment of depressive day-time fatigue, lack of concentration and lethargy.

4-methoxyamphetamine: illicit,experimental small molecule (0 associated side effects)

dextroamphetamine: illicit,approved small molecule (0 associated side effects) Used to treat attention deficit hyperactivity disorder (ADHD).

nomifensine: withdrawn small molecule (0 associated side effects)

dexmethylphenidate: approved small molecule (262 associated side effects) Dexmethylphenidate is used as a treatment for ADHD, ideally in conjunction with psychological, educational, behavioral or other forms of treatment.

887 known side effects mediated through drugs targeting this protein:

Abdominal discomfort Abdominal distension Abdominal pain  
 Abdominal pain lower Abdominal pain upper Abdominal  
 tenderness Abnormal behaviour Abnormal dreams Abscess  
 Accommodation disorder Acidosis Acne Acute coronary  
 syndrome Adjustment disorder Adverse reaction Affect lability  
 Ageusia Aggression Agitation Agranulocytosis Akathisia  
 Akinesia Alanine aminotransferase increased Albuminuria  
 Alcohol abuse Alcohol intolerance Alcohol poisoning  
 Alopecia Altered state of consciousness Amblyopia  
 Amenorrhoea Amnesia Anaemia Anaphylactic shock  
 Anaphylactoid reaction Aneurysm Anger Angina pectoris  
 Angioedema Angiopathy Angle closure glaucoma Anorectal  
 discomfort Anorectal disorder Anorgasmia Anuria Anxiety  
 Aortic aneurysm Aortic dissection Apathy Aphasia  
 Aphthous stomatitis Aplastic anaemia Apnoea  
 Appendicitis Application site reaction Arachnoiditis  
 Arrhythmia Arrhythmia supraventricular Arterial disorder  
 Arteritis Arthralgia Arthritis Arthropathy Aspartate  
 aminotransferase increased Asthenia Asthma Ataxia  
 Atelectasis Atrial fibrillation Atrioventricular block  
 Atrioventricular block complete Atrioventricular block first  
 degree Atrophic vulvovaginitis Atrophy Attention  
 deficit/hyperactivity disorder Auricular swelling Autonomic  
 neuropathy Azotaemia Back pain Bacteraemia Balanitis  
 Balanoposthitis Basal cell carcinoma Basophilia Benign  
 neoplasm Benign neoplasm of skin Biliary colic Bipolar I  
 disorder Bipolar disorder Bladder pain Bleeding time  
 prolonged Blepharitis Blindness Blood alkaline phosphatase



increased Blood bilirubin increased Blood cholesterol increased  
 Blood creatine phosphokinase increased Blood creatinine  
 increased Blood lactate dehydrogenase increased Blood pressure  
 diastolic decreased Blood pressure fluctuation Blood pressure  
 increased Blood pressure systolic increased Blood prolactin  
 increased Blood triglycerides increased Blood urea increased  
 Blood uric acid increased Body temperature decreased Body  
 temperature increased Bone disorder Bone pain Bradycardia  
 Bradykinesia Breast calcifications Breast cancer  
 Breast discharge Breast disorder Breast disorder female  
 Breast engorgement Breast enlargement Breast pain  
 Breast tenderness Breath odour Bronchitis Bronchospasm  
 Bruxism Buccoglossal syndrome Bundle branch block  
 Bundle branch block right Bursitis Calculus urinary  
 Candidiasis Capillary fragility Cardiac arrest Cardiac  
 death Cardiac disorder Cardiac failure Cardiac failure congestive  
 Cardiac fibrillation Cardiac flutter Cardiac murmur  
 Cardiac output decreased Cardiac valve disease Cardio-  
 respiratory arrest Cardiomyopathy Cardiovascular disorder  
 Carpal tunnel syndrome Cataract Catatonia Cellulitis  
 Cerebral arteritis Cerebral haemorrhage Cerebral  
 ischaemia Cerebrovascular accident Cerebrovascular disorder  
 Cervicitis Cheilitis Chest discomfort Chest pain Chills  
 Cholecystitis Cholelithiasis Choreoathetosis  
 Chromatopsia Chronic obstructive pulmonary disease  
 Circumoral oedema Cold sweat Colitis Colitis ulcerative  
 Coma Coma hepatic Completed suicide Conduction disorder  
 Confusional state Congenital anomaly Conjunctival  
 haemorrhage Conjunctival oedema Conjunctivitis Conjunctivitis  
 infective Connective tissue disorder Constipation Conversion  
 disorder Convulsion Coordination abnormal Corneal lesion  
 Coronary artery disease Cough Crocodile tears syndrome  
 Crying Crystal urine Crystalluria Cyanosis  
 Cystitis Cystitis noninfective Cytolytic hepatitis  
 Deafness Death Decreased appetite Deep vein thrombosis  
 Defaecation urgency Dehydration Delirium Delusion  
 Dementia Dental caries Dependence Depersonalisation  
 Depressed level of consciousness Depressed mood Depression  
 Depressive symptom Derealisation Dermal cyst Dermatitis  
 Dermatitis atopic Dermatitis bullous Dermatitis contact  
 Dermatitis exfoliative Developmental delay Diabetes mellitus  
 Diarrhoea Diplopia Discomfort Disorientation  
 Dissociation Disturbance in attention Disturbance in  
 sexual arousal Diverticulitis Dizziness Dizziness postural  
 Drug abuse Drug dependence Drug effect decreased Drug  
 eruption Drug hypersensitivity Drug interaction Dry eye Dry  
 mouth Dry skin Duodenal ulcer Duodenal ulcer haemorrhage  
 Duodenitis Dysarthria Dysgeusia Dyskinesia Dyslexia  
 Dyslipidaemia Dysmenorrhoea Dyspareunia Dyspepsia  
 Dysphagia Dysphonia Dysphoria Dyspnoea Dystonia  
 Dysuria Ear disorder Ear infection Ear pain  
 Ecchymosis Eczema Ejaculation delayed Ejaculation  
 disorder Ejaculation failure Electrocardiogram PR interval  
 Electrocardiogram QRS complex Electrocardiogram abnormal  
 Electrocardiogram change Electroencephalogram abnormal

Elevated mood      Embolism      Emotional distress      Endocrine  
 disorder      Endometriosis      Energy increased      Enuresis  
 Eosinophilia      Epicondylitis      Epidermal necrosis  
 Epilepsy      Epistaxis      Erectile dysfunction      Eructation  
 Erythema multiforme      Erythema nodosum      Euphoric mood  
 Exophthalmos      Exostosis      Extrapyrmidal disorder  
 Extrasystoles      Eye disorder      Eye haemorrhage      Eye pain  
 Eyelid ptosis      Face oedema      Faecal incontinence      Fasciitis  
 Fasting      Fatigue      Feeling abnormal      Feeling cold  
 Feeling drunk      Feeling hot      Feeling jittery      Feeling of  
 despair      Female sexual arousal disorder      Female sexual  
 dysfunction      Fibrocystic breast disease      Flank pain      Flat affect  
 Flatulence      Fluid retention      Flushing      Folliculitis      Food  
 allergy      Frequent bowel movements      Fungal infection      Furuncle  
 Gait disturbance      Galactorrhoea      Gangrene      Gastric disorder  
 Gastric pH decreased      Gastric ulcer      Gastritis      Gastritis  
 viral      Gastroenteritis      Gastrointestinal disorder      Gastrointestinal  
 haemorrhage      Gastrointestinal obstruction      Gastrointestinal pain  
 Gastrointestinal ulcer      Gastrooesophageal reflux disease  
 Generalised oedema      Genital discharge      Genital rash  
 Gingival bleeding      Gingival hyperplasia      Gingival pain  
 Gingivitis      Glaucoma      Glossitis      Glycosuria      Goitre      Gout  
 Grand mal convulsion      Granuloma      Gravitational oedema  
 Growth retardation      Gynaecomastia      Haematemesis  
 Haematochezia      Haematocrit decreased      Haematoma      Haematuria  
 Haemochromatosis      Haemoglobin      Haemolytic anaemia      Haemoptysis  
 Haemorrhage      Haemorrhoids      Hair colour changes      Hair  
 texture abnormal      Hallucination      Hallucination, auditory  
 Hallucination, tactile      Hallucination, visual      Hangover  
 Headache      Hearing impaired      Heart rate irregular      Heat rash  
 Hepatic cirrhosis      Hepatic enzyme increased      Hepatic failure  
 Hepatic function abnormal      Hepatic necrosis      Hepatic steatosis  
 Hepatitis      Hepatitis C      Hepatitis fulminant      Hepatocellular  
 injury      Hepatomegaly      Hernia      Herpes simplex      Herpes  
 virus infection      Herpes zoster      Hiccups      High density  
 lipoprotein decreased      Hirsutism      Homicidal ideation      Hordeolum  
 Hormone level abnormal      Hostility      Hot flush      Hunger  
 Hyperacusis      Hyperaemia      Hyperaesthesia      Hyperbilirubinaemia  
 Hypercalciuria      Hyperchlorhydria      Hypercholesterolaemia  
 Hyperglycaemia      Hyperhidrosis      Hyperkalaemia  
 Hyperkeratosis      Hyperkinesia      Hyperlipidaemia  
 Hyperphosphataemia      Hyperplasia      Hyperprolactinaemia  
 Hyperpyrexia      Hyperreflexia      Hypersensitivity  
 Hypertension      Hypertensive crisis      Hyperthermia  
 Hyperthyroidism      Hypertonia      Hypertonic bladder  
 Hypertrichosis      Hypertriglyceridaemia      Hypertrophy  
 Hyperuricaemia      Hyperventilation      Hypervigilance      Hypaema  
 Hypoaesthesia      Hypocholesterolaemia      Hypoglycaemia  
 Hypohidrosis      Hypokalaemia      Hypokinesia      Hypomania  
 Hypomenorrhoea      Hyponatraemia      Hypophosphataemia  
 Hypoproteinaemia      Hyporeflexia      Hypotension      Hypothermia  
 Hypothyroidism      Hypotonia      Hypotrichosis      Hypouricaemia  
 Hypoventilation      Hypoxia      Ileitis      Ill-defined disorder  
 Illusion      Immune system disorder      Impaired gastric emptying  
 Impaired healing      Inappropriate antidiuretic hormone secretion

Incontinence      Increased appetite      Increased bronchial  
 secretion      Increased tendency to bruise      Induration      Infarction  
 Infection      Infestation      Inflammation      Influenza      Influenza  
 like illness      Infrequent bowel movements      Inguinal hernia  
 Initial insomnia      Inner ear disorder      Insomnia  
 Interstitial lung disease      Intestinal functional disorder  
 Intestinal obstruction      Intestinal perforation      Intraocular  
 pressure increased      Irritability      Irritable bowel syndrome  
 Ischaemia      Jaundice      Joint stiffness      Joint swelling  
 Keratitis      Keratoconjunctivitis sicca      Labyrinthitis  
 Lacrimation decreased      Lacrimation increased      Laryngeal  
 disorder      Laryngeal oedema      Laryngitis      Laryngospasm      Latex  
 allergy      Leiomyoma      Lethargy      Leukocytosis      Leukoderma  
 Leukopenia      Libido decreased      Libido increased      Lichenoid  
 keratosis      Lip dry      Liver disorder      Liver function test abnormal  
 Liver injury      Liver tenderness      Local reaction      Localised  
 infection      Loss of consciousness      Loss of libido      Low density  
 lipoprotein increased      Lung disorder      Lymphadenopathy  
 Lymphocytosis      Macular degeneration      Maculopathy      Major  
 depression      Malaise      Male sexual dysfunction      Mania      Mastitis  
 Mediastinal disorder      Melaena      Memory impairment      Meningism  
 Menopausal symptoms      Menopause      Menorrhagia      Menstrual  
 disorder      Menstruation irregular      Mental disability      Mental disorder  
 Metrorrhagia      Micturition disorder      Micturition urgency  
 Middle insomnia      Migraine      Miosis      Mitral valve disease  
 Mood swings      Motion sickness      Mouth ulceration      Mucous membrane  
 disorder      Multiple myeloma      Muscle contractions involuntary  
 Muscle contracture      Muscle relaxant therapy      Muscle  
 rigidity      Muscle spasms      Muscle tightness      Muscle twitching  
 Muscular weakness      Musculoskeletal chest pain      Musculoskeletal  
 discomfort      Musculoskeletal disorder      Musculoskeletal pain  
 Musculoskeletal stiffness      Myalgia      Mydriasis      Myocardial  
 infarction      Myoclonus      Myopathy      Nail disorder      Nasal congestion  
 Nasal dryness      Nasopharyngitis      Nausea      Neck pain  
 Necrosis      Neoplasm malignant      Nephrolithiasis      Nephropathy  
 Nervous system disorder      Nervousness      Neuralgia      Neuritis  
 Neuroleptic malignant syndrome      Neuropathy peripheral  
 Neurosis      Neutropenia      Night blindness      Night sweats  
 Nightmare      Nipple pain      Nocturia      Nodule      Nuchal rigidity  
 Nystagmus      Obstruction      Oculogyric crisis      Oedema      Oedema  
 mouth      Oedema peripheral      Oesophageal disorder      Oesophageal spasm  
 Oesophageal stenosis      Oesophagitis      Oliguria  
 Onychoclasia      Optic neuritis      Oral candidiasis      Oral pain  
 Orchitis noninfective      Orgasm abnormal      Oropharyngeal pain  
 Orthostatic hypotension      Osteoarthritis      Osteoarthropathy  
 Osteoporosis      Osteosclerosis      Otitis externa      Otitis  
 media      Ovarian cyst      Ovarian disorder      Pain      Pain in extremity      Pain  
 in jaw      Painful erection      Pallor      Palpitations  
 Pancreatitis      Pancytopenia      Panic attack      Panic  
 reaction      Papilloedema      Papule      Paraesthesia oral      Paralysis  
 Paranoia      Paresis      Parkinsonism      Parosmia      Parotitis  
 Pathological fracture      Pelvic infection      Pelvic pain      Penis  
 disorder      Peptic ulcer      Periodontitis      Periorbital oedema  
 Peripheral coldness      Peripheral ischaemia      Peripheral  
 vascular disorder      Perseveration      Personality change      Personality

disorder    Petechiae    Pharyngeal oedema Pharyngitis Pharyngitis  
 streptococcal    Phlebitis    Photophobia Photopsia    Photosensitivity  
 reaction    Piloerection    Plantar fasciitis Plasmacytoma  
     Platelet count decreased    Pleurisy    Pleuritic pain  
     Pneumonia    Poisoning    Pollakiuria Polycythaemia vera    Polyp  
     Polyuria    Premenstrual syndrome    Pressure of speech  
     Priapism    Procedural pain    Proctalgia Proctitis    Prostate  
 infection    Prostatic disorder    Prostatitis Prostatomegaly  
     Prurigo    Pruritus    Pruritus generalised  
     Pseudocholinesterase deficiency    Psoriasis    Psychomotor  
 retardation Psychotic disorder    Pulmonary arterial hypertension  
     Pulmonary congestion    Pulmonary embolism    Pulmonary  
 eosinophilia    Pulmonary hypertension Purpura    Pyelonephritis  
     Pyuria    Rash    Rash erythematous Rash follicular    Rash  
 macular    Rash maculo-papular    Rash pustular    Raynaud's  
 phenomenon    Rectal haemorrhage    Rectal tenesmus    Renal failure  
     Renal failure acute    Renal impairment    Renal pain    Respiration  
 abnormal    Respiratory arrest    Respiratory disorder    Respiratory  
 failure    Respiratory rate decreased    Respiratory tract congestion  
     Respiratory tract infection    Restless legs syndrome    Retinal  
 detachment    Retinal haemorrhage    Retinitis pigmentosa    Reversible  
 ischaemic neurological deficit    Rhabdomyolysis    Rheumatoid  
 arthritis    Rhinitis    Rhinitis seasonal Rhinorrhoea Salivary gland  
 enlargement    Salivary hypersecretion    Salpingitis Scab  
     Schizophrenia    Sciatica    Scleritis    Scotoma    Seasonal  
 allergy    Sebaceous gland disorder    Seborrhoeic dermatitis  
     Sedation    Sensation of heaviness    Sensitisation    Sensory  
 disturbance    Serum sickness    Sexual dysfunction    Shock Sicca  
 syndrome    Sinus arrhythmia    Sinus bradycardia Sinus congestion    Sinus  
 disorder    Sinus headache    Sinusitis    Skin atrophy    Skin  
 discolouration    Skin disorder    Skin exfoliation    Skin  
 hyperpigmentation    Skin hypertrophy    Skin irritation    Skin odour  
 abnormal    Skin striae    Skin ulcer    Sleep apnoea syndrome    Sleep  
 disorder    Sluggishness    Sneezing    Snoring    Social avoidant  
 behaviour    Somnambulism    Somnolence    Speech disorder    Sputum  
 increased    Stevens-Johnson syndrome    Sticky skin Stomatitis  
     Strangury    Stress    Stridor    Stupor    Sudden cardiac  
 death    Sudden death    Suicidal behaviour    Suicide attempt  
     Supraventricular tachycardia    Swelling    Swelling face  
     Syncope    Systemic lupus erythematosus    Tachycardia Tardive  
 dyskinesia    Tearfulness    Tenderness    Tendinous contracture    Tendon  
 disorder    Tendonitis    Tenosynovitis    Tension    Tension headache  
     Terminal insomnia    Testicular pain    Testicular swelling  
     Therapeutic response decreased    Thinking abnormal Thirst  
     Throat irritation    Throat tightness    Thrombocytopenia  
     Thrombocytopenic purpura    Thrombocytosis    Thrombophlebitis  
     Thrombosis    Thyroid neoplasm    Thyroiditis Tic    Tinea infection  
     Tinea pedis    Tinnitus    Tobacco user    Tongue discolouration  
     Tongue disorder    Tongue oedema    Tongue ulceration    Tonsillitis  
     Tooth abscess    Tooth disorder    Tooth infection    Toothache  
     Torsade de pointes    Torticollis    Toxic epidermal necrolysis  
     Tremor    Trichotillomania    Trismus    Type IV  
 hypersensitivity reaction    Ulcer    Ulcer haemorrhage    Unintended  
 pregnancy    Upper respiratory tract infection    Urethral disorder  
     Urethral pain    Urinary hesitation    Urinary incontinence

Urinary retention Urinary tract disorder Urinary tract  
infection Urine abnormality Urine analysis abnormal Urine flow  
decreased Urine odour abnormal Urine output increased Urticaria  
Uterine haemorrhage Uterine leiomyoma Uterine spasm  
Uterovaginal prolapse Uveitis VIIth nerve paralysis  
Vaginal haemorrhage Vaginal infection Vaginal inflammation  
Vaginitis bacterial Varicose vein Vascular purpura  
Vasculitis Vasculitis necrotising Vasoconstriction  
Vasodilation procedure Venous insufficiency Venous thrombosis  
Ventricular arrhythmia Ventricular extrasystoles Ventricular  
fibrillation Ventricular tachycardia Vertigo Viral  
diarrhoea Viral infection Vision blurred Visual acuity reduced  
Visual impairment Vitreous disorder Vitreous floaters Vocal cord  
disorder Vomiting Vulvovaginal discomfort Vulvovaginal  
dryness Weight decreased Weight increased Wheezing White blood  
cell count abnormal White blood cell count increased Withdrawal  
syndrome Wound infection Xerophthalmia Yawning

\*\*\*\*\*  
\*\*\*\*\*

Gamma-aminobutyric acid receptor subunit rho-3 - Group: Channel

Treated with:

- lorazepam: approved small molecule (126 associated side effects) For the management of anxiety disorders, and for treatment of status epilepticus.
- temazepam: approved small molecule (35 associated side effects) For the short-term treatment of insomnia (generally 7-10 days).
- clobazam: illicit, approved small molecule (58 associated side effects) For treatment and management of epilepsy and anxiety disorder.
- alprazolam: illicit, approved small molecule (178 associated side effects) For the management of anxiety disorder or the short-term relief of symptoms of anxiety and for the treatment of panic disorder, with or without agoraphobia.
- chlordiazepoxide: illicit, approved small molecule (20 associated side effects) For the management of anxiety disorders or for the short-term relief of symptoms of anxiety, withdrawal symptoms of acute alcoholism, and preoperative apprehension and anxiety.
- adinazolam: approved small molecule (0 associated side effects) For the treatment of anxiety and status epilepticus.
- clorazepate: illicit, approved small molecule (0 associated side effects) For the management of anxiety disorders or for the short-term relief of the symptoms of anxiety. Also used as adjunctive therapy in the management of partial seizures and for the symptomatic relief of acute alcohol withdrawal.
- midazolam: illicit, approved small molecule (119 associated side effects) For use as a sedative perioperatively.
- flurazepam: illicit, approved small molecule (62 associated side effects) For short-term and intermittent use in patients with recurring insomnia and poor sleeping habits
- halazepam: illicit, approved small molecule (0 associated side effects) Used to relieve anxiety, nervousness, and tension associated with anxiety disorders.
- diazepam: illicit, approved small molecule (149 associated side effects) Used in the treatment of severe anxiety disorders, as a

hypnotic in the short-term management of insomnia, as a sedative and premedicant, as an anticonvulsant, and in the management of alcohol withdrawal syndrome.

oxazepam: approved small molecule (36 associated side effects)

For the treatment of anxiety disorders and alcohol withdrawal.

triazolam: illicit,approved,withdrawn small molecule (66 associated side effects) For the short-term treatment of insomnia.

clonazepam: illicit,approved small molecule (228 associated side effects) Used as an anticonvulsant in the treatment of the Lennox-Gastaut syndrome (petit mal variant), akinetic and myoclonic seizures.

estazolam: illicit,approved small molecule (131 associated side effects) For the short-term management of insomnia characterized by difficulty in falling asleep, frequent nocturnal awakenings, and/or early morning awakenings.

bromazepam: illicit,approved small molecule (47 associated side effects) For the short-term treatment of insomnia, short-term treatment of anxiety or panic attacks, if a benzodiazepine is required, and the alleviation of the symptoms of alcohol- and opiate-withdrawal.

clotiazepam: illicit,approved small molecule (0 associated side effects) For the treatment of anxiety disorders.

fludiazepam: illicit,approved small molecule (0 associated side effects) Used for the short-term treatment of anxiety disorders.

prazepam: illicit,approved small molecule (0 associated side effects) For the treatment of anxiety disorders.

quazepam: illicit,approved small molecule (0 associated side effects) Used to treat insomnia.

cinolazepam: approved small molecule (0 associated side effects) For the management of anxiety disorders or for the short-term relief of the symptoms of anxiety or anxiety associated with depressive symptoms.

nitrazepam: approved small molecule (44 associated side effects)

Used to treat short-term sleeping problems (insomnia), such as difficulty falling asleep, frequent awakenings during the night, and early-morning awakening.

486 known side effects mediated through drugs targeting this protein:

|                        |                           |                    |                            |                 |
|------------------------|---------------------------|--------------------|----------------------------|-----------------|
| Abdominal discomfort   | Abdominal distension      | Abdominal pain     |                            |                 |
| Abnormal dreams        | Abnormal faeces           | Acidosis           | Acne                       | Affect          |
| labiality              | Ageusia                   | Aggression         | Agitation                  | Agranulocytosis |
| Akathisia              | Akinesia                  | Alcohol poisoning  | Alopecia                   | Altered         |
| state of consciousness | Amblyopia                 | Amnesia            | Anaemia                    |                 |
| Anaphylactic shock     | Anaphylactoid reaction    | Anger              | Angioedema                 |                 |
| Angiopathy             | Anorectal discomfort      | Anorectal disorder |                            |                 |
| Anterograde amnesia    | Anxiety                   | Aortic dissection  | Apathy                     |                 |
| Aphonia                | Apnoea                    | Appetite disorder  | Arrhythmia                 | Arterial        |
| spasm                  | Arthralgia                | Arthritis          | Aspartate aminotransferase | increased       |
| Aspiration             | Asthenia                  | Asthma             | Ataxia                     | Athetosis       |
| Atrioventricular block | Back pain                 | Balance disorder   | Bladder                    |                 |
| dysfunction            | Bladder pain              | Blindness          | Blood alkaline phosphatase |                 |
| increased              | Blood bilirubin increased | Blood disorder     | Blood                      |                 |

glucose decreased Blood thromboplastin decreased Body temperature  
 decreased Body temperature increased Borderline personality  
 disorder Bradycardia Bradyphrenia Brain oedema Breast  
 disorder Breast pain Breast swelling Bronchitis Bronchospasm  
 Candidiasis Carbon dioxide increased Cardiac arrest  
 Cardiac disorder Cardiac failure Cardio-respiratory arrest  
 Cardiovascular disorder Cellulitis Cerebellar syndrome  
 Chest discomfort Chest pain Chills Choking sensation  
 Chorea Chromaturia Clonic convulsion Clonus Clumsiness  
 Coagulopathy Cognitive disorder Coma Completed suicide  
 Confusional state Connective tissue disorder Constipation  
 Conversion disorder Convulsion Coordination abnormal Cough  
 Cyanosis Cystitis Cystitis noninfective Cytolytic  
 hepatitis Deafness Death Decreased appetite Dehydration  
 Delirium Delirium tremens Delusion Dependence  
 Depersonalisation Depressed level of consciousness Depressed  
 mood Depression Depressive symptom Derealisation Dermatitis  
 Dermatitis contact Dermatitis exfoliative Diarrhoea  
 Diplopia Discomfort Disinhibition Disorientation  
 Disturbance in attention Disturbance in sexual arousal  
 Dizziness Drooling Drug abuse Drug dependence Drug  
 eruption Drug intolerance Drug withdrawal convulsions Dry mouth  
 Dry skin Dysaesthesia Dysarthria Dysgeusia Dyskinesia  
 Dysmenorrhoea Dyspepsia Dysphagia Dysphonia Dysphoria  
 Dyspnoea Dysthymic disorder Dystonia Dysuria Ear  
 infection Ear pain Ecchymosis Effusion Ejaculation delayed  
 Ejaculation failure Emotional disorder Emotional  
 distress Emotional poverty Encephalopathy Encopresis Endometrial  
 sarcoma Energy increased Enterocolitis Enuresis  
 Eosinophilia Epilepsy Epistaxis Erectile dysfunction  
 Erythema Erythema multiforme Euphoric mood  
 Extrapyrimal disorder Extrasystoles Eye disorder  
 Eye irritation Eye movement disorder Eye pain Eye  
 swelling Face oedema Faecal incontinence Fatigue Feeling  
 abnormal Feeling cold Feeling drunk Feeling hot Feeling  
 jittery Feeling of body temperature change Flat affect Flatulence  
 Floppy infant Flushing Fungal infection Gait disturbance  
 Galactorrhoea Gangrene Gastric disorder Gastritis  
 Gastrointestinal disorder Gastrointestinal haemorrhage  
 Gastrointestinal pain Gingival pain Glossitis Glossodynia  
 Gout Grand mal convulsion Gynaecomastia Haematoma  
 Haematuria Haemoglobin Haemoglobin decreased Haemorrhage  
 Haemorrhage urinary tract Haemorrhoids Hallucination  
 Hangover Headache Hearing impaired Heart rate irregular  
 Hemiparesis Hepatic enzyme increased Hepatic failure  
 Hepatic function abnormal Hepatitis Hepatocellular injury  
 Hepatomegaly Herpes simplex Herpes virus infection  
 Hiccups Hirsutism Homicidal ideation Hordeolum  
 Hostility Hunger Hypercapnia Hyperhidrosis  
 Hyperkinesia Hyperprolactinaemia Hypersensitivity  
 Hypersomnia Hypertension Hypertonia Hyperventilation  
 Hypoaesthesia Hypochromic anaemia Hypokinesia Hypomania  
 Hyponatraemia Hypopnoea Hyporeflexia Hypotension  
 Hypothermia Hypotonia Hypoventilation Hypoxia Ill-defined  
 disorder Illusion Inappropriate antidiuretic hormone secretion

Incontinence      Increased appetite      Induration      Infection  
 Infectious mononucleosis      Infestation      Inflammation  
 Influenza      Injection site pain      Injection site reaction  
 Insomnia      Intraocular pressure increased      Irritability  
 Jaundice      Joint swelling      Laryngitis      Laryngospasm  
 Lethargy      Leukocytosis      Leukopenia      Libido decreased  
 Libido increased      Liver function test abnormal      Liver injury  
 Local reaction      Logorrhoea      Loss of consciousness      Loss of  
 libido      Lung disorder      Lymphadenopathy      Major depression  
 Malaise      Mania      Mean arterial pressure      Mediastinal disorder  
 Melaena      Memory impairment      Menstrual disorder  
 Menstruation irregular      Mental disability      Mental disorder  
 Mental retardation      Micturition urgency      Migraine  
 Miosis      Mood swings      Motion sickness      Movement disorder  
 Muscle relaxant therapy      Muscle rigidity      Muscle spasms  
 Muscle spasticity      Muscle twitching      Muscular weakness  
 Musculoskeletal discomfort      Musculoskeletal disorder  
 Musculoskeletal stiffness      Myalgia      Mydriasis      Myoclonus  
 Nasal congestion      Nasopharyngitis      Nausea      Neck pain  
 Necrosis      Nervous system disorder      Nervousness      Neuritis  
 Neuroleptic malignant syndrome      Neuropathy peripheral  
 Neutropenia      Nightmare      Nocturia      Nodal rhythm      Nodule  
 Nystagmus      Obstruction      Obstructive airways disorder      Oedema  
 Oedema peripheral      Oliguria      Oropharyngeal pain      Orthostatic  
 hypotension      Osteoarthritis      Otitis media      Pain      Pain in extremity  
 Pain in jaw      Pallor      Palpitations      Pancytopenia  
 Paraesthesia      Paraesthesia oral      Paralysis      Paresis  
 Pelvic pain      Penile discharge      Pericardial effusion      Periorbital  
 oedema      Personality disorder      Phaeochromocytoma      Pharyngitis  
 Phlebitis      Photophobia      Photosensitivity reaction  
 Pigmentation disorder      Platelet count decreased      Pleurisy  
 Pneumonia      Pneumothorax      Pollakiuria      Polyuria      Post-  
 traumatic stress disorder      Precocious puberty      Premenstrual  
 syndrome      Presyncope      Proctalgia      Prothrombin level increased  
 Pruritus      Psychomotor retardation      Psychotic disorder  
 Puberty      Pulmonary congestion      Pulmonary function test  
 decreased      Pulmonary haemorrhage      Pulmonary hypertension      Pulmonary  
 oedema      Purpura      Rash      Rash maculo-papular      Rectal  
 haemorrhage      Rectal tenesmus      Renal failure      Respiratory arrest  
 Respiratory depression      Respiratory disorder      Respiratory  
 failure      Respiratory moniliiasis      Respiratory rate decreased  
 Respiratory tract congestion      Respiratory tract infection  
 Retching      Retrograde amnesia      Rhinitis allergic      Rhinorrhoea  
 Rhonchi      Salivary hypersecretion      Scotoma      Sedation  
 Sexual dysfunction      Shock      Sinus tachycardia      Sinusitis      Skin  
 burning sensation      Skin discolouration      Skin disorder      Skin  
 exfoliation      Skin necrosis      Sleep apnoea syndrome      Sleep disorder  
 Sleep talking      Sluggishness      Sneezing      Somnambulism  
 Somnolence      Speech disorder      Stevens-Johnson syndrome  
 Stomatitis      Strabismus      Stridor      Stupor      Substance abuse  
 Suicidal ideation      Swelling      Swelling face      Swollen tongue  
 Syncope      Tachycardia      Tachypnoea      Tenderness      Tendonitis  
 Tension      Therapeutic response decreased      Thinking abnormal  
 Thirst      Thrombocytopenia      Thrombocytosis      Thrombophlebitis  
 Thrombosis      Thyroid neoplasm      Tinnitus      Tongue coated



Tongue disorder Tongue oedema Tooth disorder Toothache  
 Toxic epidermal necrolysis Transaminases increased  
 Tremor Tropical spastic paresis Ulcer Upper airway  
 obstruction Upper respiratory tract infection Urethral disorder  
 Urinary hesitation Urinary incontinence Urinary retention  
 Urinary tract disorder Urinary tract infection Urine  
 colour abnormal Urine output increased Urticaria Vaginal discharge  
 Vaginal infection Vaginal inflammation Vascular purpura  
 Vasodilation procedure Venous thrombosis Ventricular arrhythmia  
 Ventricular extrasystoles Vertigo Viral infection  
 Vision blurred Visual acuity reduced Visual impairment  
 Vomiting Weight decreased Weight increased Wheezing  
 Withdrawal syndrome Xeroderma Xerophthalmia Yawning

\*\*\*\*\*  
 \*\*\*\*\*

Gram positive bacteria cell membranes - Group: Other

Treated with:

daptomycin: approved biotech (0 associated side effects) For  
 the treatment of complicated skin and skin structure infections  
 caused by susceptible strains of Gram-positive microorganisms.

known side effects mediated through drugs targeting this protein:

\*\*\*\*\*  
 \*\*\*\*\*

Excitatory amino acid transporter 5 - Group: Transporter

Treated with:

l-glutamic acid: approved, nutraceutical small molecule (0  
 associated side effects) Considered to be nature's "Brain food"  
 by improving mental capacities; helps speed the healing of ulcers;  
 gives a "lift" from fatigue; helps control alcoholism, schizophrenia  
 and the craving for sugar.

known side effects mediated through drugs targeting this protein:

\*\*\*\*\*  
 \*\*\*\*\*

Amiloride-sensitive sodium channel subunit delta - Group: Channel

Treated with:

triamterene: approved small molecule (25 associated side  
 effects) For the treatment of edema associated with congestive  
 heart failure, cirrhosis of the liver, and the nephrotic syndrome;  
 also in steroid-induced edema, idiopathic edema, and edema due to  
 secondary hyperaldosteronism.

amiloride: approved small molecule (85 associated side effects)

For use as adjunctive treatment with thiazide diuretics or  
 other kaliuretic-diuretic agents in congestive heart failure or  
 hypertension.

98 known side effects mediated through drugs targeting this protein:

Abdominal distension Abdominal pain Agitation Alopecia  
 Anaemia Anaemia megaloblastic Anaphylactic shock  
 Angina pectoris Aplastic anaemia Arthralgia Asthenia  
 Atrioventricular block Atrioventricular block complete  
 Azotaemia Back pain Bladder pain Bladder spasm Blood

potassium increased Blood urea increased Bradycardia Chest pain  
Coma Confusional state Constipation Cough Decreased  
appetite Dehydration Dermatitis Diarrhoea Disturbance in sexual  
arousal Dizziness Dry mouth Dyspepsia Dyspnoea Dysuria  
Encephalopathy Erectile dysfunction Fatigue Feeling  
abnormal Flatulence Foetor hepaticus Gastrointestinal haemorrhage  
Gastrointestinal pain Gynaecomastia Haemoglobin Haemorrhage  
Headache Hepatic encephalopathy Hepatic function abnormal  
Hepatocellular injury Hyperkalaemia Hyperkinesia  
Hypersensitivity Hypokalaemia Hyponatraemia Hypotension  
Insomnia Intraocular pressure increased Jaundice  
Libido decreased Liver disorder Muscle spasms Muscular  
weakness Musculoskeletal discomfort Nasal congestion Nausea  
Neck pain Nephritis Nephrolithiasis Nervousness Neutropenia  
Oral pruritus Orthostatic hypotension Pain Pain in  
extremity Palpitations Paraesthesia Paralysis flaccid  
Peptic ulcer Photosensitivity reaction Pollakiuria  
Polyuria Pruritus Rash Renal failure acute Shock  
Somnolence Tension Thirst Thrombocytopenia Tinnitus  
Tremor Tubulointerstitial nephritis Ulcer Urine output  
increased Vertigo Visual impairment Vomiting

\*\*\*\*\*  
\*\*\*\*\*

G protein-activated inward rectifier potassium channel 4 - Group:  
Channel

Treated with:

glyburide: approved small molecule (52 associated side effects)  
Indicated as an adjunct to diet to lower the blood glucose in  
patients with NIDDM whose hyperglycemia cannot be satisfactorily  
controlled by diet alone.

52 known side effects mediated through drugs targeting this protein:

Abdominal distension Abdominal pain Agranulocytosis Anaemia  
Angioedema Aplastic anaemia Arthralgia Asthenia Cholestasis  
Diarrhoea Dyspepsia Dyspnoea Erythema Erythropenia  
Gastrointestinal disorder Gastrointestinal pain Haemolytic  
anaemia Hepatic failure Hepatic function abnormal Hepatitis  
Hypersensitivity Hyponatraemia Hypopituitarism Hypotension  
Inappropriate antidiuretic hormone secretion Jaundice  
Jaundice cholestatic Leukocytoclastic vasculitis Leukopenia  
Liver disorder Malnutrition Musculoskeletal discomfort  
Myalgia Nausea Nephropathy Nervous system disorder  
Pain Pancytopenia Photosensitivity reaction Porphyria  
Porphyria non-acute Pruritus Purpura Rash Shock  
Thrombocytopenia Urticaria Vascular purpura Vasculitis  
Vision blurred Visual impairment Vomiting

\*\*\*\*\*  
\*\*\*\*\*

Glutamate [NMDA] receptor subunit epsilon-3 - Group: Channel

Treated with:

l-glutamic acid: approved, nutraceutical small molecule (0  
associated side effects) Considered to be nature's "Brain food"  
by improving mental capacities; helps speed the healing of ulcers;  
gives a "lift" from fatigue; helps control alcoholism, schizophrenia  
and the craving for sugar.

glycine: approved, nutraceutical small molecule (38 associated side effects) Supplemental glycine may have antispastic activity. Very early findings suggest it may also have antipsychotic activity as well as antioxidant and anti-inflammatory activities.

meperidine: approved small molecule (50 associated side effects)  
Used to control moderate to severe pain.

tenocyclidine: illicit, experimental small molecule (0 associated side effects) Because of its high affinity for the phencyclidine binding site on the NMDA receptor, the 3H radiolabelled form of tenocyclidine is widely used in research into NMDA receptors.

76 known side effects mediated through drugs targeting this protein:  
Acidosis Affect lability Agitation Anaphylactic shock  
Angina pectoris Asthenia Back pain Blindness Blindness  
transient Bradycardia Cardiac arrest Chills Coma Confusional  
state Constipation Convulsion Coordination abnormal Dehydration  
Delirium Dermatitis Diarrhoea Disorientation Dizziness  
Dry mouth Dyskinesia Dysphoria Electrolyte imbalance  
Encephalopathy Euphoric mood Feeling abnormal Fluid  
overload Flushing Hallucination Headache Hyperammonaemia  
Hyperhidrosis Hyperkinesia Hypersensitivity  
Hyponatraemia Hypotension Induration Injection site pain  
Loss of consciousness Lung disorder Mood swings Muscle  
spasms Muscle twitching Myoclonus Nausea Oedema Pain  
Palpitations Paralysis Phlebitis Polyuria Pruritus  
Pulmonary congestion Pulmonary function test decreased Rash  
Respiratory arrest Respiratory depression Respiratory tract  
congestion Rhinitis Salivary hypersecretion Sedation Shock  
Syncope Tachycardia Thirst Thrombophlebitis Tremor  
Urinary retention Urticaria Vertigo Visual impairment  
Vomiting

\*\*\*\*\*  
\*\*\*\*\*

Transient receptor potential cation channel subfamily M member 8 -  
Group: Channel

Treated with:

menthol: approved small molecule (0 associated side effects)  
Used to treat occasional minor irritation, pain, sore mouth,  
and sore throat as well as cough associated with a cold or inhaled  
irritants.

known side effects mediated through drugs targeting this protein:

\*\*\*\*\*  
\*\*\*\*\*

Insulin-like growth factor 1 receptor - Group: Enzyme

Treated with:

insulin recombinant: approved biotech (0 associated side effects)  
For treatment of Type I and II diabetes mellitus.

insulin lispro: approved biotech (49 associated side effects)  
For the treatment of Type 1 or 2 diabetes mellitus. To be used  
in conjunction with an intermediate or long-acting insulin except  
when used in a continuous insulin infusion pump.

insulin glargine:approved biotech (54 associated side effects)

For the treatment of Type 1 or 2 diabetes mellitus in patients over 17 years old who require a long-acting (basal) insulin for the control of hyperglycemia. May be used in pediatric patients with Type 1 diabetes mellitus who require a long-acting (basal) insulin for glycemic control.

insulin, porcine:approved biotech (0 associated side effects)

For the treatment of type I and II diabetes mellitus.

mecasermin:approved biotech (0 associated side effects) For the long-term treatment of growth failure in pediatric patients with Primary IGF1 deficiency or with GH gene deletion who have developed neutralizing antibodies to GH. It is not indicated to treat Secondary IGF1 deficiency resulting from GH deficiency, malnutrition, hypothyroidism or other causes; it is not a substitute for GH therapy.

alpha-d-mannose: experimental small molecule (0 associated side effects)

phosphoaminophosphonic acid-adenylate ester: experimental small molecule (0 associated side effects)

(4z)-6-bromo-4-({[4-(pyrrolidin-1-ylmethyl)phenyl]amino}methylidene)isoquinoline-1,3(2h,4h)-dione: experimental small molecule (0 associated side effects)

3-[5-(1h-imidazol-1-yl)-7-methyl-1h-benzimidazol-2-yl]-4-[(pyridin-2-ylmethyl)amino]pyridin-2(1h)-one: experimental small molecule (0 associated side effects)

71 known side effects mediated through drugs targeting this protein:

Abdominal pain Anaphylactic shock Angioedema Angiopathy  
Arthralgia Asthenia Back pain Body temperature increased  
Bronchitis Bronchospasm Cataract Coma Cough Death  
Dermatitis Diabetic retinopathy Diarrhoea Disease  
progression Drug hypersensitivity Dysmenorrhoea Dyspnoea  
Erythema Gastrointestinal pain Glycosuria Headache  
Hyperhidrosis Hypernatraemia Hypersensitivity  
Hypertension Hypertrophy Hypoglycaemia Hypokalaemia  
Hypotension Infection Inflammation Influenza Infusion  
site reaction Injection site pain Injection site reaction  
Lipoatrophy Lipodystrophy acquired Lipohypertrophy Loss of  
consciousness Musculoskeletal discomfort Myalgia Nausea  
Neuropathy peripheral Normal pressure hydrocephalus  
Obstruction Oedema Oedema peripheral Pain Pain in extremity  
Pharyngitis Polyarteritis nodosa Pruritus Rash Refraction  
disorder Respiratory tract infection Retinal disorder Retinal  
vascular disorder Rhinitis Shock Sinusitis Swelling Tachycardia  
Upper respiratory tract infection Urinary tract infection  
Urticaria Weight increased Wheezing

\*\*\*\*\*  
\*\*\*\*\*

Metabotropic glutamate receptor 5 - Group: Receptor

Treated with:

acamprosate: approved small molecule (212 associated side effects) For the maintenance of abstinence from alcohol in patients with alcohol dependence who are abstinent at treatment initiation

212 known side effects mediated through drugs targeting this protein:

Abdominal distension Abdominal pain Abnormal dreams Abscess  
Acne Acute coronary syndrome Agitation Alanine  
aminotransferase increased Alcoholism Alopecia Amblyopia  
Amnesia Anaemia Angina pectoris Anxiety Apathy  
Arterial occlusive disease Arthralgia Arthritis Ascites  
Aspartate aminotransferase increased Asthenia Asthma  
Back pain Blindness Blister Blood alkaline phosphatase  
increased Blood creatinine increased Blood lactate dehydrogenase  
increased Blood uric acid increased Body temperature increased  
Bronchitis Cardiac failure Cardiomyopathy Chest pain  
Chills Cholecystitis Colitis Completed suicide  
Confusional stateConstipation Convulsion Cough Deafness  
Death Decreased appetite Deep vein thrombosis  
DepersonalisationDermatitis Dermatitis bullous Dermatitis  
exfoliativeDiabetes mellitusDiarrhoea Diplopia Discomfort  
Disturbance in sexual arousal Dizziness Dry mouth Dry  
skin Duodenal ulcer Dysgeusia Dyspepsia Dysphagia Dyspnoea  
Ecchymosis Eczema Ejaculation disorder Embolism  
Encephalopathy Endophthalmitis Eosinophilia Epistaxis  
Erectile dysfunction Eructation Face oedemaFeeling abnormal  
Flat affectFlatulence Gastric disorder Gastric ulcer  
Gastritis Gastroenteritis Gastrointestinal haemorrhage  
Gastrointestinal pain Goitre Gout Haematemesis  
Haematuria Haemoglobin Haemorrhage Hallucination Headache  
Hepatic cirrhosisHepatic neoplasm malignant Hepatitis  
Hernia Hostility Hyperbilirubinaemia Hyperglycaemia  
Hyperhidrosis Hyperkinesia Hypersensitivity  
Hypertension Hyperuricaemia Hypoaesthesia  
Hyponatraemia Hypotension Hypothyroidism Hypovitaminosis  
Ill-defined disorder Incontinence Increased appetite  
Infarction Infection Influenza Insomnia Laryngospasm  
Leukopenia Libido decreased Libido increased Liver function  
test abnormal Loss of consciousness Lymphadenopathy  
Lymphocytosis Malaise Mania Melaena Menorrhagia  
Mental disabilityMesenteric occlusion Metrorrhagia  
Micturition urgency Migraine Monocytosis Mouth ulceration  
Muscle spasms Muscle twitching Musculoskeletal discomfort  
Myalgia Myocardial infarction Myopathy Nausea Neck  
pain Neoplasm malignant Nephrolithiasis Nervousness Neuralgia  
Neurosis Nocturia Oedema Oedema peripheral  
Oesophagitis Orthostatic hypotension Pain  
Palpitations Pancreatitis Panophthalmitis  
Paraesthesia Paranoia Pharyngitis Phlebitis Photophobia  
Photosensitivity reaction Pneumonia Pollakiuria Polyuria  
Pruritus Psoriasis Psychotic disorder Pulmonary  
embolism Rash Rash maculo-papular Rash pustular Rectal  
haemorrhage Renal failure Renal failure acute Rheumatoid  
arthritis Rhinitis Salivary hypersecretion Sexual  
dysfunction Shock Somnolence Stomatitis Sudden death Suicidal  
ideation Suicide attempt Syncope Tachycardia Tension  
Thinking abnormalThirst Thrombocytopenia Thrombophlebitis  
Tinnitus Torticollis Tremor Ulcer Urinary incontinence  
Urinary tract infection Urine output increased Urticaria

Vaginal infection Vaginal inflammation Varicose vein  
Vasodilation procedure Vertigo Visual acuity reduced  
Visual impairment Vomiting Weight decreased Weight increased  
Withdrawal syndrome

\*\*\*\*\*  
\*\*\*\*\*

Glutamate [NMDA] receptor subunit epsilon-1 - Group: Channel

Treated with:

l-glutamic acid: approved, nutraceutical small molecule (0 associated side effects) Considered to be nature's "Brain food" by improving mental capacities; helps speed the healing of ulcers; gives a "lift" from fatigue; helps control alcoholism, schizophrenia and the craving for sugar.

glycine: approved, nutraceutical small molecule (38 associated side effects) Supplemental glycine may have antispastic activity. Very early findings suggest it may also have antipsychotic activity as well as antioxidant and anti-inflammatory activities.

meperidine: approved small molecule (50 associated side effects)  
Used to control moderate to severe pain.

felbamate: approved small molecule (249 associated side effects) For use only in those patients who respond inadequately to alternative treatments and whose epilepsy is so severe that a substantial risk of aplastic anemia and/or liver failure is deemed acceptable in light of the benefits conferred by its use.

memantine: approved small molecule (250 associated side effects) For the treatment of moderate to severe dementia of the Alzheimer's type.

halothane: approved small molecule (10 associated side effects)  
For the induction and maintenance of general anesthesia

tenocyclidine: illicit, experimental small molecule (0 associated side effects) Because of its high affinity for the phencyclidine binding site on the NMDA receptor, the 3H radiolabelled form of tenocyclidine is widely used in research into NMDA receptors.

396 known side effects mediated through drugs targeting this protein:

Abdominal pain Acidosis Acne Acute coronary syndrome Acute leukaemia Affect lability Aggression Agitation Agranulocytosis Alanine aminotransferase increased Alopecia Altered state of consciousness Amnesia Anaemia Anaphylactic shock Anaphylactoid reaction Anencephaly Angina pectoris Angiopathy Antinuclear antibody positive Anxiety Aortic dissection Apathy Aphasia Apnoea Arrhythmia Arrhythmia supraventricular Arthralgia Aspartate aminotransferase increased Aspiration Asthenia Asthma Ataxia Atrial fibrillation Atrioventricular block Azotaemia Back pain Blepharitis Blindness Blindness transient Blood alkaline phosphatase increased Blood creatinine increased Blood lactate dehydrogenase increased Body temperature decreased Body temperature increased Bradycardia Brain oedema Bronchitis Cardiac arrest Cardiac disorder Cardiac failure Cardiac fibrillation Carpal tunnel syndrome Cataract Cellulitis Cerebral haemorrhage Cerebral infarction Cerebrovascular accident Cerebrovascular disorder Chest pain Chills

Cholelithiasis    Choreoathetosis    Coagulopathy    Colitis  
 Coma    Completed suicide    Confusional state    Congenital anomaly  
 Congenital genital malformation    Conjunctival haemorrhage  
 Conjunctivitis    Connective tissue disorder    Constipation  
 Convulsion    Coordination abnormal    Corneal opacity    Cough  
 Crocodile tears syndrome    Crying    Deafness    Death  
 Decreased appetite    Deep vein thrombosis    Dehydration  
 Delirium    Delusion    Depersonalisation    Depressed level of  
 consciousness    Dermatitis    Dermatitis bullous    Developmental  
 delay    Diabetes mellitus    Diarrhoea    Diplopia    Discomfort  
 Disorientation    Disseminated intravascular coagulation  
 Dissociation    Disturbance in attention    Disturbance in  
 sexual arousal    Diverticulitis    Dizziness    Drug interaction    Dry  
 mouth    Dysarthria    Dysgeusia    Dyskinesia    Dyspepsia    Dysphagia  
 Dysphoria    Dyspnoea    Dystonia    Dysuria    Ear infection  
 Eczema    Effusion    Electrocardiogram QT prolonged  
 Electrocardiogram change    Electrolyte imbalance    Embolism  
 Encephalocele    Encephalopathy    Endocrine disorder  
 Eritis    Eosinophilia    Epistaxis    Erectile dysfunction  
 Erythema multiforme    Euphoric mood    Extrapyrmidal  
 disorder    Eye pain    Eyelid ptosis    Face oedema    Faecal  
 incontinence    Fatigue    Feeling abnormal    Flat affect    Flatulence  
 Fluid overload    Flushing    Foetal disorder    Gait disturbance  
 Gangrene    Gastric dilatation    Gastric ulcer    Gastritis  
 Gastroenteritis    Gastrointestinal disorder    Gastrointestinal  
 haemorrhage    Gastrointestinal pain    Gastrooesophageal reflux disease  
 Gingival bleeding    Glaucoma    Glossitis    Grand mal convulsion  
 Haematemesis    Haematuria    Haemoglobin    Haemolytic anaemia  
 Haemolytic uraemic syndrome    Haemoptysis    Haemorrhage    Haemorrhage  
 intracranial    Hallucination    Headache    Hearing impaired  
 Hemianopia    Hemiplegia    Hepatic failure    Hepatic function  
 abnormal    Hepatic necrosis    Hepatitis    Hepatitis cholestatic  
 Hepatobiliary disease    Hepatorenal syndrome    Hiccups  
 Hormone level abnormal    Hyperammonaemia    Hyperglycaemia  
 Hyperhidrosis    Hyperkinesia    Hyperlipidaemia  
 Hypernatraemia    Hyperpyrexia    Hypersensitivity  
 Hypertension    Hypertonia    Hypoaesthesia    Hypocalcaemia  
 Hypochromic anaemia    Hypoglycaemia    Hypokalaemia  
 Hypokinesia    Hypomagnesaemia    Hyponatraemia    Hypophosphataemia  
 Hypotension    Hypothermia    Hypoxia    Ileus    Ill-defined disorder  
 Inappropriate antidiuretic hormone secretion    Incontinence  
 Increased appetite    Induration    Infarction    Infection  
 Infestation    Influenza    Injection site pain    Insomnia  
 Intermittent claudication    International normalised ratio  
 increased    Intestinal obstruction    Intra-uterine death  
 Irritability    Ischaemia    Jaundice    Lacrimation increased  
 Lethargy    Leukaemia    Leukocytosis    Leukopenia    Libido  
 increased    Lichen planus    Livedo reticularis    Lividity    Loss  
 of consciousness    Lung disorder    Lymphadenopathy    Lymphoma  
 Lymphoproliferative disorder    Macular degeneration    Macule  
 Malaise    Mania    Mean cell volume    Mean cell volume increased  
 Mediastinal disorder    Megacolon    Melaena    Menstrual  
 disorder    Mental disability    Mental disorder due to a general  
 medical condition    Microcephaly    Migraine    Miosis  
 Mononeuritis    Mood swings    Mouth ulceration    Mucous membrane

disorder    Muscle contractions involuntary    Muscle spasms  
             Muscle spasticityMuscle twitching Muscular weakness  
             Musculoskeletal discomfort    Myalgia        Myeloid leukaemia  
             Myocardial infarction Myoclonus    Myopia        Nasopharyngitis  
             Nausea        Necrosis    Necrosis ischaemic    Neoplasm  
             Nephrotic syndrome        Nervous system disorder        Nervousness  
             Neuralgia    Neuroleptic malignant syndrome    Neuropathy  
 peripheral Neurosis    Neutropenia Nightmare    Nystagmus    Obstruction  
             Oedema        Oedema mucosal    Oedema peripheralOesophageal  
 disorder    Oesophageal ulcerOesophagitis        Orthostatic  
 hypotension Osteoarthritis    Osteonecrosis    Otitis media    Pain  
             Pain in extremityPalpitations        Pancreatitis  
             Pancreatitis acute        Pancytopenia        Paraesthesia  
             Paralysis    Paranoia    Peripheral ischaemia    Personality  
 disorder    Pharyngitis Phlebitis    Photosensitivity allergic reaction  
             Photosensitivity reaction    Placental disorder    Platelet  
 disorder    Pleural disorder Pleural effusion Pneumonia    Pneumonia  
 aspiration Polyuria    Prothrombin time shortened    Pruritus  
             Psychotic disorder        Pulmonary congestion    Pulmonary  
 embolism    Pulmonary function test decreased Pulmonary haemorrhage  
             Pulmonary oedema Purpura        Rash Rash erythematousRash  
 papular    Rectal haemorrhage        Renal failure acute    Renal  
 function test abnormal Renal impairment Respiratory arrest  
             Respiratory depression Respiratory failure        Respiratory tract  
 congestion Respiratory tract infection Retinal detachment  
             Retinal haemorrhage        Rhabdomyolysis        Rhinitis        Salivary  
 hypersecretion    Sedation    Sepsis        Shock Sinusitis    Skin  
 disorder    Skin odour abnormal        Skin ulcer Sleep disorder  
             Somnolence Status epilepticus        Stevens-Johnson syndrome  
             Stomach dilation procedure Stomatitis Stupor        Sudden  
 death Sudden infant death syndrome Suicidal ideationSuicide attempt  
             Supraventricular tachycardia Swelling        Syncope        Tachycardia  
             Tardive dyskinesia        Tension        Thinking abnormalThirst  
             Thrombocytopenia Thrombocytopenic purpura        Thrombophlebitis  
             Thrombosis Thrombotic thrombocytopenic purpura        Tinnitus  
             Torsade de pointes        Toxic epidermal necrolysis    Transient  
 ischaemic attack Tremor        Ulcer Upper respiratory tract infection  
             Urethral disorderUrinary incontinence    Urinary retention  
             Urinary tract disorder Urinary tract infection        Urticaria  
             Uterovaginal prolapse Vaginal haemorrhage        Vascular dementia  
             Vascular purpura Vasculitis Venous thrombosisVertigo  
             Vision blurred        Visual acuity reduced    Visual impairment  
             Vomiting        Weight decreased Weight increased X-linked  
 lymphoproliferative syndrome Xerophthalmia

\*\*\*\*\*  
 \*\*\*\*\*

Voltage-dependent L-type calcium channel subunit alpha-1S - Group:  
 Channel

Treated with:

isradipine: approved    small molecule    (0 associated side effects)  
             For the management of mild to moderate essential hypertension.  
 It may be used alone or concurrently with thiazide-type diuretics.  
 amlodipine: approved    small molecule    (136 associated side  
 effects)    For the treatment of hypertension and chronic stable  
 angina.



nimodipine: approved small molecule (47 associated side effects)  
For use as an adjunct to improve neurologic outcome following subarachnoid hemorrhage (SAH) from ruptured intracranial berry aneurysms by reducing the incidence and severity of ischemic deficits.

nisoldipine: approved small molecule (161 associated side effects) For the treatment of hypertension. It may be used alone or in combination with other antihypertensive agents.

cinnarizine: approved small molecule (0 associated side effects) For the treatment of vertigo/meniere's disease, nausea and vomiting, motion sickness and also useful for vestibular symptoms of other origins.

magnesium sulfate: approved small molecule (0 associated side effects) Used for immediate control of life-threatening convulsions in the treatment of severe toxemias (pre-eclampsia and eclampsia) of pregnancy and in the treatment of acute nephritis in children. Also indicated for replacement therapy in magnesium deficiency, especially in acute hypomagnesemia accompanied by signs of tetany similar to those of hypocalcemia. Also used in uterine tetany as a myometrial relaxant.

verapamil: approved small molecule (113 associated side effects) For the treatment of hypertension, angina, and cluster headache prophylaxis.

felodipine: approved small molecule (96 associated side effects)  
For the treatment of mild to moderate essential hypertension.

nitrendipine: approved small molecule (0 associated side effects) For the treatment of mild to moderate hypertension

nifedipine: approved small molecule (217 associated side effects) For the management of vasospastic angina, chronic stable angina, hypertension, and Raynaud's phenomenon. May be used as a first line agent for left ventricular hypertrophy and isolated systolic hypertension (long-acting agents).

mibefradil: withdrawn small molecule (0 associated side effects)  
For the treatment of angina and high blood pressure.

nilvadipine: approved small molecule (0 associated side effects) For the management of vasospastic angina, chronic stable angina and hypertension.

353 known side effects mediated through drugs targeting this protein:

|                                      |                                            |                                    |
|--------------------------------------|--------------------------------------------|------------------------------------|
| Abdominal discomfort                 | Abdominal pain                             | Abnormal dreams                    |
| Accommodation disorder               | Acidosis                                   | Acne                               |
| Acute coronary syndrome              | Acute generalised exanthematous pustulosis | Affect                             |
| labiality                            | Agitation                                  | Alanine aminotransferase increased |
| Alopecia                             | Amblyopia                                  | Amnesia                            |
| Anaemia                              | Anaphylactic shock                         | Angina pectoris                    |
| Angioedema                           | Angiopathy                                 | Anxiety                            |
| Anxiety                              | disorder                                   | Apathy                             |
| Arrhythmia                           | Arthralgia                                 | Arthritis                          |
| Arthropathy                          | Asthma                                     | Asthenia                           |
| Ataxia                               | Atrial fibrillation                        | Atrioventricular block complete    |
| Atrioventricular block first degree  | Atrioventricular dissociation              | Back pain                          |
| Balance disorder                     | Bezoar                                     | Blepharitis                        |
| Blindness                            | Blindness transient                        | Blister                            |
| Blood alkaline phosphatase increased | Blood lactate dehydrogenase increased      | Blood pressure increased           |
| Blood prolactin increased            | Blood urea increased                       | Blood uric acid                    |
| Body temperature increased           | Bradycardia                                | Breast engorgement                 |
| Breast pain                          |                                            |                                    |

Bronchitis Bronchospasm Cardiac arrest Cardiac disorder  
 Cardiac failure congestive Cardiac fibrillation Cardiac  
 murmur Cardiogenic shock Cardiomyopathy Cellulitis Cerebral  
 ischaemia Cerebrovascular accident Chest discomfort Chest pain  
 Chills Cholestasis Chronic obstructive pulmonary disease  
 Cold sweat Colitis Coma Confusional state Conjunctivitis  
 Constipation Convulsion Coombs direct test positive Cough  
 Crocodile tears syndrome Decreased appetite Deep vein  
 thrombosis Depersonalisation Depressive symptom Dermatitis  
 Dermatitis bullous Dermatitis exfoliative Diabetes mellitus  
 Diarrhoea Diplopia Discomfort Disseminated intravascular  
 coagulation Dissociation Disturbance in attention Disturbance  
 in sexual arousal Dizziness postural Dry mouth Dry skin  
 Dysgeusia Dyspepsia Dysphagia Dyspnoea Dysuria Ear  
 infection Ear pain Ecchymosis Effusion Electrocardiogram  
 abnormal Eosinophilia Epistaxis Erectile dysfunction  
 Eructation Erythema Erythema multiforme Erythema nodosum  
 Erythromelalgia Extrapyrarnidal disorder Extrasystoles  
 Eye disorder Eye haemorrhage Eye pain Eye pruritus  
 Face oedema Fasting Fatigue Feeling abnormal Feeling  
 cold Feeling hot Feeling jittery Flat affect Flatulence Fluid  
 retention Flushing Fungal skin infection Galactorrhoea  
 Gamma-glutamyltransferase increased Gastritis  
 Gastrointestinal disorder Gastrointestinal haemorrhage  
 Gastrointestinal obstruction Gastrointestinal pain  
 Gastrointestinal tract irritation Gastrooesophageal reflux  
 disease Gingival bleeding Gingival disorder Gingival hyperplasia  
 Glaucoma Glomerulonephritis membranous Glossitis Gout  
 Gynaecomastia Haematoma Haematuria Haemoglobin Haemolysis  
 Haemolytic anaemia Haemorrhage Headache Hepatic enzyme  
 increased Hepatic function abnormal Hepatitis Hepatitis  
 cholestatic Hepatomegaly Herpes simplex Herpes virus infection  
 Herpes zoster Hot flush Hyperaemia Hyperglycaemia  
 Hyperhidrosis Hyperkeratosis Hyperkinesia Hyperplasia  
 Hyperprolactinaemia Hypersensitivity Hypertension  
 Hypertonia Hypertrophic cardiomyopathy Hypertrophy  
 Hypoaesthesia Hypokalaemia Hyponatraemia Hypotension  
 Hypoxia Ileus paralytic Ill-defined disorder  
 Incontinence Increased appetite Infarction Infection  
 Inflammation Influenza Insomnia Intermittent  
 claudication Irritability Ischaemia Jaundice Joint  
 stiffness Joint swelling Keratitis Laboratory test abnormal  
 Lacrimation increased Laryngitis Laryngospasm Lethargy  
 Leukocytoclastic vasculitis Leukopenia Libido decreased Liver  
 function test abnormal Loss of consciousness Lung disorder  
 Lymphadenopathy Macule Malaise Melaena Menopausal  
 symptoms Menstrual disorder Mental disability Metabolic  
 acidosis Micturition disorder Micturition urgency Migraine  
 Mood swings Mouth ulceration Muscle fatigue Muscle spasms  
 Muscle twitching Muscular weakness Musculoskeletal discomfort  
 Musculoskeletal stiffness Myalgia Myocardial infarction  
 Myocardial ischaemia Myositis Nasal congestion  
 Nasopharyngitis Nausea Neck pain Nephrolithiasis  
 Nervousness Neuropathy peripheral Nightmare Nocturia  
 Nystagmus Obstruction Obstructive airways disorder Oedema

Oedema peripheral Oesophagitis Oligomenorrhoea Oliguria  
 Oropharyngeal discomfort Oropharyngeal pain Orthostatic  
 hypotension Osteoarthritis Otitis media Pain Pain in extremity  
 Palpitations Pancreatitis Paraesthesia Paralysis  
 Paranoia Parosmia Pelvic pain Periorbital oedema  
 Peripheral ischaemia Peripheral vascular disorder Petechiae  
 Pharyngitis Phlebitis Photosensitivity reaction Platelet  
 count decreased Pleural disorder Pleural effusion Poisoning  
 Pollakiuria Polyuria Pruritus Psychotic disorder  
 Pulmonary congestion Pulmonary oedema Purpura  
 Quadripareisis Rales Rash Rash erythematous Rash maculo-  
 papular Rash pustular Regurgitation Renal failure Renal  
 failure chronic Renal impairment Respiratory disorder Respiratory  
 failure Respiratory tract congestion Respiratory tract infection  
 Retinal detachment Rhinitis Rhinorrhoea Salivary gland  
 enlargement Sensory loss Sexual dysfunction Shock Sinus  
 arrest Sinusitis Skin discolouration Skin ulcer Sleep  
 disorder Sneezing Somnolence Sticky skin Stomatitis Stridor  
 Supraventricular tachycardia Syncope Tachycardia Tenderness  
 Tenosynovitis Tension Thinking abnormal Thirst  
 Thrombocytopenia Thrombosis Thyroiditis Tinnitus Toxic  
 epidermal necrolysis Tremor Ulcer Upper respiratory tract  
 infection Urinary incontinence Urine output increased Urogenital  
 disorder Urticaria Vaginal haemorrhage Vaginal infection  
 Vaginal inflammation Vascular purpura Vasculitis  
 Vasodilation procedure Vasospasm Venous insufficiency  
 Venous thrombosis Ventricular arrhythmia Ventricular  
 extrasystoles Ventricular tachycardia Vertigo Vision  
 blurred Visual acuity reduced Visual impairment Vitreous floaters  
 Vomiting Weight decreased Weight increased Wheezing  
 Xerophthalmia

\*\*\*\*\*  
 \*\*\*\*\*

Prostaglandin E2 receptor, EP2 subtype - Group: Receptor

Treated with:

alprostadil: approved small molecule (0 associated side  
 effects) For palliative, not definitive, therapy to temporarily  
 maintain the patency of the ductus arteriosus until corrective or  
 palliative surgery can be performed in neonates who have congenital  
 heart defects and who depend upon the patent ductus for survival.  
 Also for the treatment of erectile dysfunction due to neurogenic,  
 vasculogenic, psychogenic, or mixed etiology.

dinoprostone: approved small molecule (0 associated side  
 effects) For the termination of pregnancy during the second  
 trimester (from the 12th through the 20th gestational week as  
 calculated from the first day of the last normal menstrual period),  
 as well as for evacuation of the uterine contents in the management  
 of missed abortion or intrauterine fetal death up to 28 weeks of  
 gestational age as calculated from the first day of the last normal  
 menstrual period. Also used in the management of nonmetastatic  
 gestational trophoblastic disease (benign hydatidiform mole). Other  
 indications include improving the cervical inducibility (cervical  
 "ripening") in pregnant women at or near term with a medical or  
 obstetrical need for labor induction, and the management of  
 postpartum hemorrhage.

misoprostol: approved small molecule (102 associated side effects)

102 known side effects mediated through drugs targeting this protein:

Abdominal pain Acute coronary syndrome Alopecia Anaemia  
Anaphylactic shock Anorectal disorder Anxiety  
Arrhythmia Arterial thrombosis Arthralgia Asthenia Back  
pain Blindness Blood alkaline phosphatase increased Body  
temperature increased Breast pain Bronchitis Bronchospasm  
Cardiac enzymes increased Cerebrovascular accident Chest  
pain Chills Confusional state Conjunctivitis Constipation  
Deafness Dehydration Dermatitis Diarrhoea Dizziness  
Dysgeusia Dysmenorrhoea Dyspepsia Dysphagia Dyspnoea  
Dysuria Ear pain Embolism Epistaxis Erectile  
dysfunction Fatigue Feeling abnormal Flatulence Gastrointestinal  
disorder Gastrointestinal haemorrhage Gastrointestinal pain  
Gastroesophageal reflux disease Genital disorder female  
Gingivitis Glycosuria Gout Haematuria Haemoglobin Haemorrhage  
Headache Hyperhidrosis Hypersensitivity Hypertension  
Hypotension Infarction Infection Inflammation  
Inflammatory bowel disease Loss of consciousness Loss of  
libido Menorrhagia Menstrual disorder Metrorrhagia  
Muscle spasms Musculoskeletal discomfort Musculoskeletal  
stiffness Myalgia Myocardial infarction Nausea Neuropathy  
peripheral Neurosis Oedema Pain Pallor Phlebitis  
Pneumonia Polyuria Pulmonary embolism Purpura Rash  
Red blood cell sedimentation rate increased Respiratory tract  
infection Shock Somnolence Syncope Thirst Thrombocytopenia  
Thrombosis Tinnitus Upper respiratory tract infection  
Urinary tract infection Urine output increased Vaginal  
haemorrhage Vascular purpura Visual acuity reduced Visual impairment  
Vomiting

\*\*\*\*\*  
\*\*\*\*\*

Glycine receptor subunit alpha-1 - Group: Channel

Treated with:

glycine: approved, nutraceutical small molecule (38 associated side effects) Supplemental glycine may have antispastic activity. Very early findings suggest it may also have antipsychotic activity as well as antioxidant and anti-inflammatory activities.

enflurane: approved small molecule (15 associated side effects)

Used for the induction and maintenance of general anaesthesia during surgery and cesarean section and also used for analgesia during vaginal delivery.

lindane: approved small molecule (9 associated side effects)

For the treatment of patients infested with *Sarcoptes scabiei* or pediculosis capitis who have either failed to respond to adequate doses, or are intolerant of other approved therapies.

isoflurane: approved small molecule (31 associated side effects)

For induction and maintenance of general anaesthesia.

ethanol: approved small molecule (11 associated side effects)

For therapeutic neurolysis of nerves or ganglia for the relief of intractable chronic pain in such conditions as inoperable cancer

and trigeminal neuralgia (tic douloureux), in patients for whom neurosurgical procedures are contraindicated.

methoxyflurane: approved small molecule (0 associated side effects) For use in the induction and maintenance of general anesthesia

halothane: approved small molecule (10 associated side effects) For the induction and maintenance of general anesthesia

desflurane: approved small molecule (110 associated side effects) For use as an inhalation agent for induction and/or maintenance of anesthesia for inpatient and outpatient surgery in adults.

sevoflurane: approved small molecule (107 associated side effects) Used for induction and maintenance of general anesthesia in adult and pediatric patients for inpatient and outpatient surgery.

ginkgo biloba: approved, nutraceutical small molecule (0 associated side effects) Appears to be effective in: alleviating age-related memory impairment in some elderly people with mild to moderate age-related memory or cognitive impairment; improving cognitive function in healthy young to middle-aged people; improving symptoms of Alzheimer's, vascular or mixed dementia; improving damage to the visual field in patients with normal tension glaucoma; decreasing the number of painful attacks in patients with Raynaud's syndrome; and may improve symptoms of vertigo and dizziness in some patients.

d-serine: experimental small molecule (0 associated side effects)

208 known side effects mediated through drugs targeting this protein:

Abdominal pain Acidosis Acute coronary syndrome Agitation  
Alanine aminotransferase increased Albuminuria Alopecia  
Amblyopia Ammonia increased Anaphylactic shock  
Anaphylactoid reaction Angina pectoris Angiopathy Aortic  
dissection Apnoea Arrhythmia Arrhythmia supraventricular  
Aspartate aminotransferase increased Asthenia Asthma  
Atrial fibrillation Atrioventricular block Atrioventricular  
block complete Atrioventricular block second degree Back pain  
Blindness Blindness transient Blood creatinine increased  
Body temperature decreased Body temperature increased Bone  
disorder Bradycardia Breath holding Bronchospasm Burning  
sensation Cardiac arrest Cardiac disorder Cardiac fibrillation  
Chills Cholestasis Coagulopathy Coma Confusional state  
Conjunctival hyperaemia Conjunctivitis Convulsion Cough  
Cranial nerve paralysis Dehydration Delirium Dermatitis  
contact Diarrhoea Discomfort Dizziness Drug administration  
error Dry mouth Dysgeusia Dyspnoea Dysuria Electrocardiogram  
QT prolonged Electrocardiogram T wave inversion Electrocardiogram  
abnormal Electrolyte imbalance Encephalopathy Erectile  
dysfunction Erythema Extrasystoles Eye disorder Eye  
inflammation Eye irritation Eye pain Eyelid oedema  
Fatigue Feeling abnormal Fluid overload Foetor hepaticus  
Gastrointestinal disorder Gastrointestinal pain Glycosuria  
Haemoglobin Haemoptysis Haemorrhage Hallucination Headache  
Hepatic failure Hepatic function abnormal Hepatic necrosis

Hepatitis Hepatobiliary disease Hepatocellular injury  
 Hiccups Hyperaemia Hyperaesthesia Hyperammonaemia  
 Hyperbilirubinaemia Hyperglycaemia Hyperkalaemia  
 Hyperkinesia Hyperpyrexia Hypersensitivity  
 Hypertension Hyperthermia malignant Hypertonia  
 Hyperventilation Hypocapnia Hypokalaemia Hypokinesia  
 Hyponatraemia Hypophosphataemia Hypotension Hypothermia  
 Hypoventilation Hypoxia Ileus Ill-defined disorder  
 Incontinence Increased bronchial secretion Infarction  
 Insomnia Ischaemia Jaundice Keratitis Laryngospasm  
 Leukocytosis Liver disorder Loss of consciousness Lung  
 disorder Malaise Malignant hypertension Mediastinal disorder  
 Meningitis Metabolic acidosis Migraine Muscle rigidity  
 Musculoskeletal discomfort Myalgia Mycobacterium avium  
 complex infection Mycobacterium test Myocardial infarction  
 Myocardial ischaemia Nausea Necrosis Nephritis  
 Nervous system disorder Nervousness Neuritis Neuropathy  
 peripheral Nodal arrhythmia Obstruction Obstructive airways disorder  
 Ocular hyperaemia Oedema Oliguria Pain Palpitations  
 Pancreatitis acute Paraesthesia Paralysis Pharyngitis  
 Polyuria Pruritus Pulmonary congestion Pulmonary  
 function test decreased Rash Renal failure Respiratory  
 arrest Respiratory depression Respiratory distress Respiratory  
 failure Respiratory tract congestion Rhabdomyolysis Rhinitis  
 Salivary hypersecretion Shock Skin burning sensation Skin  
 disorder Somnolence Sputum increased Stridor Supraventricular  
 extrasystoles Syncope Synovial cyst Tachyarrhythmia  
 Tachycardia Tension Thirst Thrombocytopenia  
 Thrombophlebitis Torsade de pointes Tubulointerstitial  
 nephritis Ulcerative keratitis Urethral disorder Urinary retention  
 Urinary tract disorder Urine abnormality Urine analysis  
 abnormal Urticaria Vasodilation procedure Ventricular  
 extrasystoles Ventricular failure Ventricular fibrillation  
 Ventricular hypokinesia Ventricular tachycardia  
 Vertigo Visual acuity reduced Visual impairment Vomiting  
 Wheezing

\*\*\*\*\*  
\*\*\*\*\*

Toll-like receptor 7 - Group: Receptor

Treated with:

imiquimod: approved small molecule (146 associated side effects) For the topical treatment of clinically typical, nonhyperkeratotic, nonhypertrophic actinic keratoses on the face or scalp in immunocompetent adults. Also indicated for the treatment of external genital and perianal warts/condyloma acuminata in individuals 12 years old and above.

hydroxychloroquine: approved small molecule (67 associated side effects) For the suppressive treatment and treatment of acute attacks of malaria due to *Plasmodium vivax*, *P. malariae*, and susceptible strains of *P. falciparum*. It is also indicated for the treatment of discoid and systemic lupus erythematosus, and rheumatoid arthritis.

190 known side effects mediated through drugs targeting this protein:

Abdominal pain Acute coronary syndrome Acute generalised  
exanthematous pustulosis Acute hepatic failure Agitation  
Agranulocytosis Alopecia Anaemia Angioedema Anxiety  
Aplastic anaemia Application site reaction Arrhythmia  
Arthralgia Arthritis Asthenia Ataxia Atrial  
fibrillation Atrophy Back pain Blindness Blood disorder  
Body temperature increased Bone pain Bronchitis  
Bronchospasm Capillary leak syndrome Cardiac failure  
Cardiac fibrillation Cardiomyopathy Cardiovascular  
disorder Cellulitis Cerebrovascular accident Cheilitis Chest  
pain Chills Completed suicide Congenital eye disorder  
Conjunctivitis Convulsion Corneal deposits Cough Crying  
Cyst Deafness Deafness neurosensory Decreased appetite  
Dermatitis Dermatitis exfoliative Diarrhoea Dizziness  
Dyspepsia Dyspnoea Dysuria Eczema Erythema  
Erythema annulare Erythema multiforme Eye disorder Eye  
infection Fatigue Febrile convulsion Fungal infection  
Gastrointestinal disorder Gastrointestinal pain  
Gastroesophageal reflux disease Gout Haemoglobin Haemolysis  
Haemorrhage Halo vision Headache Hepatic failure Hepatic  
function abnormal Hernia Herpes simplex Herpes virus infection  
Herpes zoster Hypercholesterolaemia Hyperkeratosis  
Hypersensitivity Hypertension Hypertrophic scar Hypertrophy  
Idiopathic thrombocytopenic purpura Induration Infarction  
Infection Infestation Influenza like illness Insomnia  
Irritability Ischaemia Lethargy Leukoderma Leukopenia  
Local reaction Loss of consciousness Lymphadenopathy  
Lymphoma Macule Malaise Mental disorder Multiple  
sclerosis Muscle spasms Musculoskeletal discomfort Myalgia  
Myocardial infarction Myopathy Nausea Nervous system  
disorder Nervousness Neuromyopathy Neuropathy peripheral  
Nightmare Nystagmus Oedema Oral herpes Osteoarthropathy  
Pain Pallor Palpitations Pancytopenia Papule  
Paraesthesia Paralysis Paresis Pharyngitis Photophobia  
Photosensitivity reaction Pigmentation disorder Porphyria  
Protein urine present Proteinuria Pruritus Psoriasis  
Psychotic disorder Pulmonary congestion Pulmonary oedema  
Purpura Rash Respiratory disorder Respiratory tract  
congestion Retinal disorder Retinal pigmentation Rhinitis Scab  
Scar Scotoma Scrotal erythema Scrotal oedema Scrotal  
pain Scrotal ulcer Sensitisation Shock Sinusitis Skin  
disorder Skin exfoliation Skin hyperpigmentation Squamous cell  
carcinoma Supraventricular tachycardia Swelling Syncope  
Tachycardia Tearfulness Tenderness Tension Thrombocytopenia  
Thrombocytopenic purpura Thyroiditis Tinea cruris Tinea  
infection Tinnitus Tooth disorder Ulcer Upper respiratory  
tract infection Urethral disorder Urinary retention Urinary tract  
disorder Urinary tract infection Urticaria Vaginal infection  
Vaginal inflammation Vaginitis bacterial Vascular purpura  
Vertigo Vision blurred Visual acuity reduced Vomiting  
Weight decreased

\*\*\*\*\*  
\*\*\*\*\*

Gamma-aminobutyric-acid receptor subunit alpha-4 - Group: Channel  
Treated with:

lorazepam: approved small molecule (126 associated side effects) For the management of anxiety disorders, and for treatment of status epilepticus.

ethchlorvynol: illicit,approved small molecule (0 associated side effects) Used for short-term hypnotic therapy in the management of insomnia for periods of up to one week in duration; however, this medication generally has been replaced by other sedative-hypnotic agents.

temazepam: approved small molecule (35 associated side effects)  
For the short-term treatment of insomnia (generally 7-10 days).

butabarbital: illicit,approved small molecule (0 associated side effects) For short-term treatment of insomnia and anxiety disorders

butalbital: illicit,approved small molecule (0 associated side effects) Used in combination with acetaminophen or aspirin and caffeine for its sedative and relaxant effects in the treatment of tension headaches, migraines, and pain.

talbutal: illicit,approved small molecule (0 associated side effects) For use as a sedative and hypnotic.

pentobarbital: approved small molecule (38 associated side effects) For the short-term treatment of insomnia.

clobazam: illicit,approved small molecule (58 associated side effects) For treatment and management of epilepsy and anxiety disorder.

meprobamate: illicit,approved small molecule (54 associated side effects) For the management of anxiety disorders or for the short-term relief of the symptoms of anxiety.

alprazolam: illicit,approved small molecule (178 associated side effects) For the management of anxiety disorder or the short-term relief of symptoms of anxiety and for the treatment of panic disorder, with or without agoraphobia.

secobarbital: approved small molecule (38 associated side effects) For the Short-term treatment of intractable insomnia for patients habituated to barbiturates

metharbital: approved small molecule (0 associated side effects) Metharbital is used for the treatment of epilepsy.

chlordiazepoxide: illicit,approved small molecule (20 associated side effects) For the management of anxiety disorders or for the short-term relief of symptoms of anxiety, withdrawal symptoms of acute alcoholism, and preoperative apprehension and anxiety.

thiopental: approved small molecule (0 associated side effects)

For use as the sole anesthetic agent for brief (15 minute) procedures, for induction of anesthesia prior to administration of other anesthetic agents, to supplement regional anesthesia, to provide hypnosis during balanced anesthesia with other agents for analgesia or muscle relaxation, for the control of convulsive states during or following inhalation anesthesia or local anesthesia, in neurosurgical patients with increased intracranial pressure, and for narcoanalysis and narcosynthesis in psychiatric disorders.

clorazepate: illicit,approved small molecule (0 associated side effects) For the management of anxiety disorders or for the short-term relief of the symptoms of anxiety. Also used as



adjunctive therapy in the management of partial seizures and for the symptomatic relief of acute alcohol withdrawal.

midazolam: illicit,approved small molecule (119 associated side effects) For use as a sedative perioperatively.

flurazepam: illicit,approved small molecule (62 associated side effects) For short-term and intermittent use in patients with recurring insomnia and poor sleeping habits

primidone: approved small molecule (16 associated side effects) For the treatment of epilepsy

oxazepam: approved small molecule (36 associated side effects) For the treatment of anxiety disorders and alcohol withdrawal.

methylphenobarbital: approved small molecule (37 associated side effects) For the relief of anxiety, tension, and apprehension, also used as an anticonvulsant for the treatment of epilepsy.

triazolam: illicit,approved,withdrawn small molecule (66 associated side effects) For the short-term treatment of insomnia.

clonazepam: illicit,approved small molecule (228 associated side effects) Used as an anticonvulsant in the treatment of the Lennox-Gastaut syndrome (petit mal variant), akinetic and myoclonic seizures.

amobarbital: illicit,approved small molecule (0 associated side effects)

aprobarbital: illicit,approved small molecule (0 associated side effects)

butethal: illicit,approved small molecule (0 associated side effects) For the treatment of insomnia.

heptabarbital: approved small molecule (0 associated side effects) Used mainly for sedation and hypnosis.

hexobarbital: approved small molecule (0 associated side effects) For the induction of anesthesia prior to the use of other general anesthetic agents and for induction of anesthesia for short surgical, diagnostic, or therapeutic procedures associated with minimal painful stimuli.

barbituric acid derivative: illicit,experimental small molecule (0 associated side effects)

flunitrazepam: illicit,approved small molecule (0 associated side effects) For short-term treatment of severe insomnias, that are not responsive to other hypnotics.

bromazepam: illicit,approved small molecule (47 associated side effects) For the short-term treatment of insomnia, short-term treatment of anxiety or panic attacks, if a benzodiazepine is required, and the alleviation of the symptoms of alcohol- and opiate-withdrawal.

444 known side effects mediated through drugs targeting this protein:

Abdominal discomfort Abdominal distension Abdominal pain  
Abnormal dreams Acidosis Acne Affect lability Ageusia  
Aggression Agitation Agranulocytosis Akathisia Akinesia  
Alcohol poisoningAlopecia Altered state of consciousness  
Amnesia Anaemia Anaemia megaloblastic Anaphylactic  
shock Anaphylactoid reaction Anger Angioedema Angiopathy Anterograde  
amnesia Anuria Anxiety Aortic dissectionApathy

Aponia      Aplasia      Aplastic anaemia      Apnoea      Appetite  
 disorder      Arrhythmia      Arterial spasm      Arthralgia      Aspartate  
 aminotransferase increased      Aspiration      Asthenia      Asthma  
 Ataxia      Athetosis      Atrioventricular block      Back pain  
 Balance disorder      Bladder dysfunction      Bladder pain      Blood  
 alkaline phosphatase increased      Blood bilirubin increased      Blood  
 disorder      Blood glucose decreased      Body temperature decreased  
 Body temperature increased      Borderline personality disorder  
 Bradycardia      Bradyphrenia      Brain oedema      Breast disorder  
 Breast pain      Bronchitis      Bronchospasm      Candidiasis      Carbon  
 dioxide increased      Cardiac arrest      Cardiac disorder      Cardiac failure  
 Cardio-respiratory arrest      Cardiovascular disorder  
 Cellulitis      Cerebellar syndrome      Chest discomfort      Chest pain  
 Chills      Choking sensation      Chorea      Chromaturia      Clonic  
 convulsion      Clonus      Clumsiness      Coagulopathy      Cognitive  
 disorder      Coma      Completed suicide      Confusional state      Connective tissue  
 disorder      Constipation      Conversion disorder      Convulsion  
 Coordination abnormal      Cough      Cystitis      Cystitis noninfective  
 Cytolytic hepatitis      Death      Decreased appetite      Dehydration  
 Delirium      Delirium tremens      Delusion      Dependence  
 Depersonalisation      Depressed level of consciousness      Depressed  
 mood      Depression      Depressive symptom      Derealisation      Dermatitis  
 Dermatitis bullous      Dermatitis contact      Dermatitis  
 exfoliative      Diarrhoea      Diplopia      Discomfort      Disinhibition  
 Disorientation      Disturbance in attention      Disturbance in  
 sexual arousal      Dizziness      Drooling      Drug abuse      Drug dependence  
 Drug eruption      Drug intolerance      Drug withdrawal      convulsions  
 Dry mouth      Dysaesthesia      Dysarthria      Dysgeusia      Dyskinesia  
 Dysmenorrhoea      Dyspepsia      Dysphagia      Dysphonia      Dysphoria  
 Dyspnoea      Dysthymic disorder      Dystonia      Dysuria      Ear  
 infection      Ear pain      Ecchymosis      Effusion      Ejaculation delayed  
 Ejaculation failure      Emotional disorder      Emotional  
 distress      Encephalopathy      Encopresis      Endometrial sarcoma  
 Energy increased      Enuresis      Eosinophilia      Epilepsy  
 Epistaxis      Erectile dysfunction      Erythema      Erythema  
 multiforme      Euphoric mood      Extrapyrmidal disorder  
 Extrasystoles      Eye disorder      Eye irritation      Eye  
 movement disorder      Face oedema      Fatigue      Feeling abnormal      Feeling  
 cold      Feeling drunk      Feeling hot      Feeling jittery      Feeling of body  
 temperature change      Flat affect      Flatulence      Flushing      Fungal  
 infection      Gait disturbance      Galactorrhoea      Gangrene      Gastric  
 disorder      Gastritis      Gastrointestinal disorder      Gastrointestinal  
 haemorrhage      Gastrointestinal pain      Gingival pain      Glossitis  
 Glossodynia      Gout      Gynaecomastia      Haematoma      Haemoglobin  
 Haemoglobin decreased      Haemorrhage      Haemorrhage urinary tract  
 Haemorrhoids      Hallucination      Hangover      Headache  
 Hemiparesis      Hepatic enzyme increased      Hepatic failure  
 Hepatic function abnormal      Hepatitis      Hepatocellular injury  
 Hepatomegaly      Herpes simplex      Herpes virus infection  
 Hiccups      Hirsutism      Homicidal ideation      Hordeolum  
 Hostility      Hunger      Hypercapnia      Hyperhidrosis  
 Hyperkinesia      Hyperprolactinaemia      Hyperpyrexia  
 Hypersensitivity      Hypersomnia      Hypertension      Hypertonia  
 Hyperventilation      Hypoaesthesia      Hypochromic anaemia  
 Hypomania      Hyponatraemia      Hypopnoea      Hypotension      Hypothermia

Hypotonia Hypoventilation Hypoxia Ill-defined disorder  
 Illusion Inappropriate antidiuretic hormone secretion  
 Incontinence Increased appetite Induration Infection  
 Infectious mononucleosis Infestation Inflammation  
 Influenza Injection site pain Injection site reaction  
 Insomnia Intraocular pressure increased Irritability  
 Jaundice Joint swelling Laryngospasm Lethargy  
 Leukocytosis Leukopenia Libido decreased Libido increased  
 Liver function test abnormal Liver injury Logorrhoea Loss  
 of consciousness Loss of libido Lung disorder Lymphadenopathy  
 Major depression Malaise Mania Mean arterial pressure  
 Mediastinal disorder Memory impairment Menstrual disorder  
 Menstruation irregular Mental disability Mental disorder  
 Mental retardation Migraine Miosis Mood swings  
 Motion sickness Muscle relaxant therapy Muscle rigidity  
 Muscle spasms Muscle spasticity Muscle twitching Muscular  
 weakness Musculoskeletal discomfort Musculoskeletal disorder  
 Musculoskeletal stiffness Myalgia Mydriasis Myoclonus  
 Nasal congestion Nasopharyngitis Nausea Necrosis  
 Nervous system disorder Nervousness Neuroleptic malignant  
 syndrome Neuropathy peripheral Nightmare Nocturia Nodal  
 rhythm Nystagmus Obstruction Obstructive airways disorder  
 Oedema Oedema peripheral Oliguria Oropharyngeal pain  
 Orthostatic hypotension Osteoarthritis Osteomalacia  
 Pain Pain in extremity Pain in jaw Palpitations  
 Pancytopenia Paraesthesia Paralysis Paresis  
 Pelvic pain Pericardial effusion Periorbital oedema  
 Personality disorder Petechiae Phaeochromocytoma Pharyngitis  
 Phlebitis Phobia Photophobia Pigmentation disorder  
 Platelet count decreased Pleurisy Pneumonia  
 Pneumothorax Pollakiuria Polyuria Post-traumatic stress  
 disorder Precocious puberty Premenstrual syndrome Presyncope  
 Proctitis Pruritus Psychomotor retardation Psychotic  
 disorder Puberty Pulmonary congestion Pulmonary function  
 test decreased Pulmonary haemorrhage Pulmonary hypertension  
 Pulmonary oedema Purpura non-thrombocytopenic Rash Rash  
 maculo-papular Respiratory arrest Respiratory depression  
 Respiratory disorder Respiratory failure Respiratory  
 moniliasis Respiratory rate decreased Respiratory tract congestion  
 Respiratory tract infection Retching Retrograde amnesia  
 Rhinitis allergic Rhinorrhoea Rhonchi Salivary  
 hypersecretion Scotoma Sedation Sexual dysfunction Shock  
 Sinus tachycardia Sinusitis Skin burning sensation Skin  
 disorder Skin exfoliation Skin necrosis Sleep apnoea syndrome  
 Sleep disorder Sleep talking Sluggishness Sneezing  
 Somnambulism Somnolence Stevens-Johnson syndrome  
 Stomatitis Strabismus Stridor Stupor Substance abuse  
 Suicidal ideation Swelling Swelling face Swollen tongue  
 Syncope Tachycardia Tachypnoea Tenderness Tendinitis  
 Tension Therapeutic response decreased Thinking abnormal  
 Thirst Thrombocytopenia Thrombocytopenic purpura  
 Thrombocytosis Thrombophlebitis Tinnitus Tongue coated  
 Tongue disorder Tongue oedema Tooth disorder Toothache  
 Toxic epidermal necrolysis Tremor Tropical spastic  
 paresis Upper airway obstruction Upper respiratory tract

infection Urethral disorder Urinary incontinence Urinary retention  
Urinary tract disorder Urinary tract infection Urine  
colour abnormal Urine output increased Urticaria Vaginal infection  
Vaginal inflammation Vascular purpura Ventricular arrhythmia  
Ventricular extrasystoles Vertigo Viral infection  
Vision blurred Visual impairment Vomiting Weight decreased  
Weight increased Wheezing Withdrawal syndrome Xeroderma  
Xerophthalmia Yawning

\*\*\*\*\*  
\*\*\*\*\*

Multidrug-efflux transporter 1 regulator - Group: Transporter

Treated with:

tetraphenylphosphonium: experimental small molecule (0  
associated side effects)

known side effects mediated through drugs targeting this protein:

\*\*\*\*\*  
\*\*\*\*\*

Type-1 angiotensin II receptor - Group: Receptor

Treated with:

valsartan: approved small molecule (80 associated side effects)

May be used as a first line agent to treat uncomplicated hypertension, isolated systolic hypertension and left ventricular hypertrophy. May be used as a first line agent to delay progression of diabetic nephropathy. Losartan may be also used as a second line agent in the treatment of congestive heart failure, systolic dysfunction, myocardial infarction and coronary artery disease in those intolerant of ACE inhibitors.

olmesartan: approved small molecule (0 associated side effects)

For the treatment of hypertension.

losartan: approved small molecule (164 associated side effects) May be used as a first line agent to treat uncomplicated hypertension, isolated systolic hypertension and left ventricular hypertrophy. May be used as a first line agent to delay progression of diabetic nephropathy. Losartan may be also used as a second line agent in the treatment of congestive heart failure, systolic dysfunction, myocardial infarction and coronary artery disease in those intolerant of ACE inhibitors.

candesartan: approved small molecule (148 associated side effects) May be used as a first line agent to treat uncomplicated hypertension, isolated systolic hypertension and left ventricular hypertrophy. May be used as a first line agent to delay progression of diabetic nephropathy. Candesartan may be also used as a second line agent in the treatment of congestive heart failure, systolic dysfunction, myocardial infarction and coronary artery disease in those intolerant of ACE inhibitors.

eprosartan: approved small molecule (146 associated side effects) For the management of hypertension alone or in combination with other classes of antihypertensive agents. Also used as a first-line agent in the treatment of diabetic nephropathy, as well as a second-line agent in the treatment of congestive heart failure (only in those intolerant of ACE inhibitors).

telmisartan: approved small molecule (174 associated side effects) Used alone or in combination with other classes of

antihypertensives for the treatment of hypertension. Also used in the treatment of diabetic nephropathy in hypertensive patients with type 2 diabetes mellitus, as well as the treatment of congestive heart failure (only in patients who cannot tolerate ACE inhibitors).

irbesartan: approved small molecule (109 associated side effects) For the treatment of hypertension, as well as diabetic nephropathy with an elevated serum creatinine and proteinuria (&gt;300 mg/day) in patients with type 2 diabetes and hypertension. Irbesartan is also used as a second line agent in the treatment of congestive heart failure.

forasartan: approved small molecule (0 associated side effects) For the treatment of hypertension.

saprisartan: approved small molecule (0 associated side effects) Saprisartan is used in the treatment of hypertension and heart failure.

tasosartan: approved small molecule (0 associated side effects) Tasosartan is infrequently in the treatment of hypertension and heart failure.

340 known side effects mediated through drugs targeting this protein:

Abdominal discomfort Abdominal distension Abdominal pain  
 Abdominal pain upper Abscess Acute coronary syndrome  
 Acute interstitial pneumonitis Agitation Agranulocytosis  
 Alanine aminotransferase increased Albuminuria Alcohol  
 intolerance Alopecia Alveolitis Alveolitis fibrosing Anaemia  
 Anaphylactic shock Angina pectoris Angioedema Angiopathy  
 Anuria Anxiety Anxiety disorder Aplastic anaemia  
 Arrhythmia Arterial disorder Arterial stenosis Arthralgia  
 Arthritis Arthropathy Aspartate aminotransferase increased  
 Assisted fertilisation Asthenia Asthma Ataxia  
 Atrial fibrillation Atrioventricular block Atrioventricular  
 block second degree Autonomic neuropathy Azotaemia Back pain  
 Bladder pain Blindness Blood bilirubin increased Blood  
 creatine phosphokinase increased Blood creatinine increased Blood  
 disorder Blood pressure increased Blood triglycerides  
 increased Blood urea increased Blood uric acid increased Body  
 temperature increased Bone pain Bradycardia Bronchitis  
 Bronchospasm Bursitis Candidiasis Cardiac arrest  
 Cardiac failure congestive Cardiac fibrillation Cardiac  
 murmur Cardiovascular disorder Cataract Cellulitis  
 Cerebrovascular accident Cerebrovascular disorder Chest  
 pain Chills Cholelithiasis Coagulopathy Conduction  
 disorder Confusional state Conjunctivitis Constipation  
 Coronary artery disease Cough Cutaneous vasculitis  
 Cystitis Cystitis noninfective Death Decreased appetite  
 Dehydration Dermatitis Dermatitis exfoliative Diabetes mellitus  
 Diabetic neuropathy Diabetic vascular disorder Diarrhoea  
 Discomfort Disturbance in sexual arousal Dizziness  
 Dizziness postural Drug eruption Drug interaction Dry  
 mouth Dry skin Dysgeusia Dyspepsia Dyspnoea Dysuria Ear  
 infection Ear pain Ecchymosis Eczema Elderly  
 Electrocardiogram abnormal Electrolyte imbalance Emotional  
 disorder Emotional distress Endocrine disorder Enteritis  
 Eosinophilia Epistaxis Erectile dysfunction Erythema

Erythema multiforme    Extrasystoles    Face oedema    Fasciitis  
 Fatigue    Feeling abnormal    Fibromyalgia    Flatulence  
 Flushing    Foetor hepaticus    Fungal infection    Furuncle  
 Gastric disorder    Gastritis    Gastroenteritis    Gastrointestinal  
 disorder    Gastrointestinal pain    Gastrooesophageal reflux disease  
 Genital candidiasis    Gingivitis    Glycosuria    Gout  
 Gravitational oedema    Growth retardation    Haematuria  
 HaemoglobinHaemolysis    Haemolytic anaemia    Haemorrhage  
 Haemorrhoids    Headache    Hepatic enzyme increased  
 Hepatic failure    Hepatic function abnormal    Hepatitis  
 Hepatitis A    Hepatocellular injury    Herpes simplex    Herpes  
 virus infection    Hormone level abnormal    Hot flush  
 Hypercholesterolaemia    Hyperglycaemia    Hyperhidrosis  
 Hyperkalaemia    Hyperkinesia    Hypersensitivity  
 Hypertension    Hypertensive crisis    Hypertonia  
 Hypertriglyceridaemia    Hyperuricaemia    Hypoaesthesia  
 Hypoglycaemia    Hypokalaemia    Hyponatraemia    Hypotension  
 Idiopathic pulmonary fibrosis    Ill-defined disorder  
 Incontinence    Increased appetite    Infarction    Infection  
 Influenza    Insomnia    Intermittent claudication    Ischaemia  
 Jaundice    Jaundice cholestatic    Joint stiffness    Joint  
 swelling    Laryngeal disorder    Laryngitis    Leukopenia    Libido  
 decreased    Lip swelling    Liver disorder    Liver function test  
 abnormal    Loss of consciousness    Lymphopenia    Malaise    Melaena  
 Memory impairment    Menopausal symptoms    Menopause    Mental  
 disorder    Microcytic anaemia    Microsomia    Micturition disorder  
 Migraine    Muscle contractions involuntary    Muscle  
 contracture    Muscle spasms    Muscular weakness    Musculoskeletal chest  
 pain    Musculoskeletal discomfort    Musculoskeletal disorder  
 Musculoskeletal pain    Musculoskeletal stiffness    Myalgia  
 Myocardial infarction    Myopathy    Myositis    Nasal congestion  
 Nausea    Neoplasm malignant    Nephritis    Nephrolithiasis  
 Nephropathy    Nervous system disorder    Nervousness    Neuritis  
 Neuropathy peripheral    Neurosis    Neutropenia    Nocturia  
 Obstruction    Obstructive airways disorder    Oedema    Oedema  
 peripheral    Oesophagitis    Oligohydramnios    Oliguria    Oral  
 disorder    Orthostatic hypotension    Osteoarthritis  
 Osteoarthropathy    Otitis externa    Otitis media    Pain    Pain  
 in extremity    Palpitations    Pancreatitis    Panic disorder  
 Panic reaction    Paraesthesia    Patent ductus arteriosus  
 Periodontitis    Peripheral ischaemia    Pharyngitis  
 Photosensitivity reaction    Plantar fasciitis    Pneumonia  
 Pollakiuria    Polyuria    Premature baby    Prostatic disorder  
 Pruritus    Pulmonary congestion    Pulmonary oedema    Purpura  
 Rash    Rash maculo-papular    Renal artery stenosis    Renal  
 failure    Renal failure acute    Renal impairment    Respiratory  
 arrest    Respiratory disorder    Respiratory distress    Respiratory  
 tract congestion    Respiratory tract infection    Rhabdomyolysis  
 Rhinitis    Sciatica    Sensory loss    Sexual dysfunction  
 Shock    Sialoadenitis    Sinus bradycardia    Sinus disorder  
 Sinusitis    Skin disorder    Skin exfoliation    Skin ulcer    Sleep  
 disorder    Social avoidant behaviour    Somnolence    Swelling  
 Swelling face    Syncope    Tachycardia    Tendon disorder  
 Tendon pain    Tendonitis    Tenosynovitis    Tension  
 Thrombocytopenia    Thrombophlebitis    Tinnitus    Toothache    Toxic

epidermal necrolysis Toxic skin eruption Tracheobronchitis  
Transaminases increased Transient ischaemic attack  
Tremor Tubulointerstitial nephritis Ulcer Upper respiratory  
tract infection Urethral disorder Urinary incontinence Urinary  
tract disorder Urinary tract infection Urine abnormality Urine  
analysis abnormal Urine output increased Urticaria Vaginal infection  
Vaginal inflammation Vascular purpura Vasculitis necrotising  
Ventricular fibrillation Ventricular tachycardia  
Vertigo Viral infection Vision blurred Visual acuity  
reduced Visual impairment Vomiting Weight increased Wheezing  
Xanthopsia Xerophthalmia

\*\*\*\*\*  
\*\*\*\*\*

Fibroblast growth factor receptor 3 - Group: Enzyme

Treated with:

palifermin: approved biotech (0 associated side effects) For  
treatment of oral mucositis associated with chemotherapy and  
radiation therapy.

known side effects mediated through drugs targeting this protein:

\*\*\*\*\*  
\*\*\*\*\*

Excitatory amino acid transporter 2 - Group: Transporter

Treated with:

l-glutamic acid: approved, nutraceutical small molecule (0  
associated side effects) Considered to be nature's "Brain food"  
by improving mental capacities; helps speed the healing of ulcers;  
gives a "lift" from fatigue; helps control alcoholism, schizophrenia  
and the craving for sugar.

known side effects mediated through drugs targeting this protein:

\*\*\*\*\*  
\*\*\*\*\*

Ammonia channel - Group: Channel

Treated with:

methylamine: experimental small molecule (0 associated  
side effects)  
lauryl dimethylamine-n-oxide: experimental small molecule  
(0 associated side effects)

known side effects mediated through drugs targeting this protein:

\*\*\*\*\*  
\*\*\*\*\*

Retinoic acid receptor RXR-beta - Group: Receptor

Treated with:

adapalene: approved small molecule (35 associated side effects)  
For the topical treatment of comedo, papular and pustular acne  
(acne vulgaris) of the face, chest or back.  
bexarotene: approved small molecule (153 associated side  
effects) Used orally for the treatment of skin manifestations of  
cutaneous T-cell lymphoma (CTCL) in patients who are refractory to  
at least one prior systemic therapy. Also used topically for the

treatment of skin lesions in early (stage IA and IB) CTCL in patients who experience refractory or persistent disease with the use of other therapies or are intolerant of other therapies.

acitretin: approved small molecule (165 associated side effects) For the treatment of severe psoriasis in adults.

alitretinoin: approved small molecule (0 associated side effects) For topical treatment of cutaneous lesions in patients with AIDS-related Kaposi's sarcoma.

tazarotene: approved small molecule (23 associated side effects) Used to treat psoriasis, acne and sun damaged skin (photodamage).

etretinate: withdrawn small molecule (0 associated side effects) For the treatment of severe psoriasis in adults.

6-[1-(3,5,5,8,8-pentamethyl-5,6,7,8-tetrahydronaphthalen-2-yl)cyclopropyl]pyridine-3-carboxylic acid: experimental small molecule (0 associated side effects)

n-(2,2,2-trifluoroethyl)-n-{4-[2,2,2-trifluoro-1-hydroxy-1-(trifluoromethyl)ethyl]phenyl}benzenesulfonamide: experimental small molecule (0 associated side effects)

n-(tert-butyl)-3,5-dimethyl-n'-[(5-methyl-2,3-dihydro-1,4-benzodioxin-6-yl)carbonyl]benzohydrazide: experimental small molecule (0 associated side effects)

(2e,4e)-11-methoxy-3,7,11-trimethyldodeca-2,4-dienoic acid: experimental small molecule (0 associated side effects)

273 known side effects mediated through drugs targeting this protein:

Abdominal infection Abdominal pain Acne Ageusia Agitation  
Alanine aminotransferase increased Albuminuria Alcohol  
intolerance Alopecia Anaemia Angina pectoris Angioedema  
Anorectal discomfort Anorectal disorder Arrhythmia  
Arthralgia Arthritis Arthropathy Aspartate aminotransferase  
increased Asthenia Ataxia Atopy Atrophy Back pain  
Bacterial infection Balanoposthitis Benign intracranial  
hypertension Bleeding time prolonged Blepharitis Blister  
Blood amylase increased Blood creatinine increased Blood  
lactate dehydrogenase increased Blood triglycerides increased  
Blood uric acid increased Body temperature increased Bone  
pain Breast pain Bronchitis Burning sensation Bursitis Calcinosis  
Candidiasis Cardiac failure Cataract Cataract subcapsular  
Cellulitis Cerebrovascular accident Cerumen impaction  
Chapped lips Cheilitis Chest pain Chills Coagulation  
time prolonged Cold sweat Colitis Confusional state Congenital  
eye disorder Conjunctivitis Constipation Convulsion  
Corneal lesion Corneal neovascularisation Cough Crocodile  
tears syndrome Deafness Decreased appetite Dermatitis atopic  
Dermatitis bullous Dermatitis contact Dermatitis  
exfoliative Diarrhoea Discomfort Dizziness Dry eye Dry mouth  
Dry skin Dysgeusia Dyspepsia Dysphonia Dyspnoea  
Dysuria Ear infection Ear pain Eczema Effusion  
Eosinophilia Epistaxis Erectile dysfunction Erythema  
Exostosis Eye disorder Eye irritation Eye pain  
Eyelid oedema Face oedema Facial pain Fasting Fatigue  
Febrile neutropenia Feeling abnormal Flatulence Flushing  
Foetal disorder Gait disturbance Gastroenteritis



Gastrointestinal pain Genital dischargeGingival bleeding  
 Gingivitis Glossitis Granuloma Haematoma Haematuria  
 Haemoglobin Haemoptysis Haemorrhage Hair texture abnormal  
 Headache Hepatic failure Hepatitis Herpes simplex  
 Herpes virus infection High density lipoprotein decreased  
 Hordeolum Hot flush Hyperaesthesia Hyperbilirubinaemia  
 Hypercholesterolaemia Hyperglycaemia Hyperhidrosis  
 Hyperkalaemia Hyperlipidaemia Hypernatraemia  
 Hypersensitivity Hypertension Hypertonia  
 Hypertriglyceridaemia Hypertrophy Hypervitaminosis  
 Hypervitaminosis A Hypoaesthesia Hypocalcaemia  
 Hypochromic anaemia Hyponatraemia Hypoproteinaemia  
 Hypothyroidism Hypoxia Ill-defined disorder Impaired  
 healing Incontinence Increased appetite Infection  
 Inflammation Influenza Insomnia Interstitial lung  
 disease Iritis Jaundice Keratitis Lacrimation decreased  
 Lacrimation increased Laryngitis Lethargy Leukopenia Lip  
 dry Lip swelling Liver function test abnormal Localised oedema  
 Loss of consciousness Lymphadenopathy Lymphocytosis  
 Madarosis Malaise Mass Melaena Menopausal symptoms  
 Micturition urgency Mouth ulceration Muscle spasms  
 Muscular weaknessMusculoskeletal discomfort Myalgia Nasal  
 dryness Nausea Nervousness Neuropathy peripheral Neutropenia  
 Nodule Oedema Oedema peripheralOptic neuritis  
 Osteoarthritis Otitis externa Pain Pancreatic disorder  
 Pancreatitis acute Pancytopenia Papilloedema  
 Paraesthesia Pharyngitis Photophobia Photosensitivity  
 reaction Pleural disorder Pleural effusion Pneumonia Pollakiuria  
 Proctalgia Pruritus Pulmonary oedema Purpura Pyogenic  
 granuloma Rash Rash maculo-papular Rash papular Rash  
 pustular Rash vesicular Rectal tenesmus Renal impairment  
 Retinal haemorrhage Rhinitis Right ventricular failure  
 Saliva altered Salivary hypersecretion Scab Scotoma  
 Seborrhoeic dermatitis Sensitisation Sepsis Shock  
 Sinusitis Skin atrophy Skin discolouration Skin  
 disorder Skin exfoliation Skin fissures Skin hyperpigmentation  
 Skin hypertrophy Skin irritation Skin mass Skin oedema Skin  
 ulcer Somnolence Sticky skinStomatitis Subdural haematoma  
 Swelling Syncope TachycardiaTension Thirst  
 Thrombocytopenia Thrombocytosis Tinnitus Tongue ulceration  
 Type 2 diabetes mellitus Ulcer Urinary incontinence  
 Urinary tract infection Urine abnormalityUrine analysis  
 abnormal Urticaria Vascular purpura Vasculitis Vision blurred  
 Visual acuity reduced Vomiting Vulvovaginitis Weight  
 decreased Weight increased White blood cell count decreased White  
 blood cell disorder Xerophthalmia

\*\*\*\*\*  
 \*\*\*\*\*

Gamma-aminobutyric acid receptor subunit gamma-1 - Group: Channel  
 Treated with:  
 lorazepam: approved small molecule (126 associated side  
 effects) For the management of anxiety disorders, and for  
 treatment of status epilepticus.

temazepam: approved small molecule (35 associated side effects)  
For the short-term treatment of insomnia (generally 7-10 days).

clobazam: illicit,approved small molecule (58 associated side effects) For treatment and management of epilepsy and anxiety disorder.

alprazolam:illicit,approved small molecule (178 associated side effects) For the management of anxiety disorder or the short-term relief of symptoms of anxiety and for the treatment of panic disorder, with or without agoraphobia.

chlordiazepoxide:illicit,approved small molecule (20 associated side effects) For the management of anxiety disorders or for the short-term relief of symptoms of anxiety, withdrawal symptoms of acute alcoholism, and preoperative apprehension and anxiety.

adinazolam:approved small molecule (0 associated side effects)  
For the treatment of anxiety and status epilepticus.

clorazepate: illicit,approved small molecule (0 associated side effects) For the management of anxiety disorders or for the short-term relief of the symptoms of anxiety. Also used as adjunctive therapy in the management of partial seizures and for the symptomatic relief of acute alcohol withdrawal.

midazolam: illicit,approved small molecule (119 associated side effects) For use as a sedative perioperatively.

flurazepam:illicit,approved small molecule (62 associated side effects) For short-term and intermittent use in patients with recurring insomnia and poor sleeping habits

halazepam: illicit,approved small molecule (0 associated side effects) Used to relieve anxiety, nervousness, and tension associated with anxiety disorders.

diazepam: illicit,approved small molecule (149 associated side effects) Used in the treatment of severe anxiety disorders, as a hypnotic in the short-term management of insomnia, as a sedative and premedicant, as an anticonvulsant, and in the management of alcohol withdrawal syndrome.

oxazepam: approved small molecule (36 associated side effects)  
For the treatment of anxiety disorders and alcohol withdrawal.

triazolam: illicit,approved,withdrawn small molecule (66 associated side effects) For the short-term treatment of insomnia.

clonazepam:illicit,approved small molecule (228 associated side effects) Used as an anticonvulsant in the treatment of the Lennox-Gastaut syndrome (petit mal variant), akinetic and myoclonic seizures.

estazolam: illicit,approved small molecule (131 associated side effects) For the short-term management of insomnia characterized by difficulty in falling asleep, frequent nocturnal awakenings, and/or early morning awakenings.

bromazepam:illicit,approved small molecule (47 associated side effects) For the short-term treatment of insomnia, short-term treatment of anxiety or panic attacks, if a benzodiazepine is required, and the alleviation of the symptoms of alcohol- and opiate-withdrawal.

clotiazepam: illicit,approved small molecule (0 associated side effects) For the treatment of anxiety disorders.

fludiazepam: illicit,approved small molecule (0 associated side effects) Used for the short-term treatment of anxiety disorders.

ketazolam: approved small molecule (0 associated side effects) Ketazolam could be used for the treatment of anxiety. In approved countries, it is indicated for the treatment of anxiety, tension, irritability and similar stress related symptoms.

prazepam: illicit,approved small molecule (0 associated side effects) For the treatment of anxiety disorders.

quazepam: illicit,approved small molecule (0 associated side effects) Used to treat insomnia.

cinolazepam: approved small molecule (0 associated side effects) For the management of anxiety disorders or for the short-term relief of the symptoms of anxiety or anxiety associated with depressive symptoms.

nitrazepam: approved small molecule (44 associated side effects) Used to treat short-term sleeping problems (insomnia), such as difficulty falling asleep, frequent awakenings during the night, and early-morning awakening.

486 known side effects mediated through drugs targeting this protein:

Abdominal discomfort Abdominal distension Abdominal pain  
 Abnormal dreams Abnormal faeces Acidosis Acne Affect  
 lability Ageusia Aggression Agitation Agranulocytosis  
 Akathisia Akinesia Alcohol poisoning Alopecia Altered  
 state of consciousness Amblyopia Amnesia Anaemia  
 Anaphylactic shock Anaphylactoid reaction Anger Angioedema  
 Angiopathy Anorectal discomfort Anorectal disorder  
 Anterograde amnesia Anxiety Aortic dissection Apathy  
 Aphonia Apnoea Appetite disorder Arrhythmia Arterial  
 spasm Arthralgia Arthritis Aspartate aminotransferase increased  
 Aspiration Asthenia Asthma Ataxia Athetosis  
 Atrioventricular block Back pain Balance disorder Bladder  
 dysfunction Bladder pain Blindness Blood alkaline phosphatase  
 increased Blood bilirubin increased Blood disorder Blood  
 glucose decreased Blood thromboplastin decreased Body temperature  
 decreased Body temperature increased Borderline personality  
 disorder Bradycardia Bradyphrenia Brain oedema Breast  
 disorder Breast pain Breast swelling Bronchitis Bronchospasm  
 Candidiasis Carbon dioxide increased Cardiac arrest  
 Cardiac disorder Cardiac failure Cardio-respiratory arrest  
 Cardiovascular disorder Cellulitis Cerebellar syndrome  
 Chest discomfort Chest pain Chills Choking sensation  
 Chorea Chromaturia Clonic convulsion Clonus Clumsiness  
 Coagulopathy Cognitive disorder Coma Completed suicide  
 Confusional state Connective tissue disorder Constipation  
 Conversion disorder Convulsion Coordination abnormal Cough  
 Cyanosis Cystitis Cystitis noninfective Cytolytic  
 hepatitis Deafness Death Decreased appetite Dehydration  
 Delirium Delirium tremens Delusion Dependence  
 Depersonalisation Depressed level of consciousness Depressed  
 mood Depression Depressive symptom Derealisation Dermatitis  
 Dermatitis contact Dermatitis exfoliative Diarrhoea  
 Diplopia Discomfort Disinhibition Disorientation

Disturbance in attention      Disturbance in sexual arousal  
 Dizziness   Drooling    Drug abuse   Drug dependence    Drug  
 eruption    Drug intolerance   Drug withdrawal   convulsions   Dry mouth  
 Dry skin    Dysaesthesia      Dysarthria   Dysgeusia    Dyskinesia  
 Dysmenorrhoea    Dyspepsia    Dysphagia    Dysphonia    Dysphoria  
 Dyspnoea    Dysthymic disorder      Dystonia    Dysuria    Ear  
 infection    Ear pain    Ecchymosis   Effusion    Ejaculation delayed  
 Ejaculation failure      Emotional disorder      Emotional  
 distress    Emotional poverty   Encephalopathy    Encopresis   Endometrial  
 sarcoma    Energy increased   Enterocolitis      Enuresis  
 Eosinophilia      Epilepsy    Epistaxis    Erectile dysfunction  
 Erythema    Erythema multiforme      Euphoric mood  
 Extrapyrarnidal disorder      Extrasystoles      Eye disorder  
 Eye irritation    Eye movement disorder    Eye pain    Eye  
 swelling    Face oedema   Faecal incontinence      Fatigue    Feeling  
 abnormal    Feeling cold      Feeling drunk      Feeling hot    Feeling  
 jittery    Feeling of body temperature change   Flat affect   Flatulence  
 Floppy infant    Flushing    Fungal infection    Gait disturbance  
 Galactorrhoea    Gangrene    Gastric disorder    Gastritis  
 Gastrointestinal disorder    Gastrointestinal haemorrhage  
 Gastrointestinal pain    Gingival pain      Glossitis    Glossodynia  
 Gout    Grand mal convulsion    Gynaecomastia      Haematoma  
 Haematuria    Haemoglobin    Haemoglobin decreased    Haemorrhage  
 Haemorrhage urinary tract    Haemorrhoids      Hallucination  
 Hangover    Headache    Hearing impaired    Heart rate irregular  
 Hemiparesis    Hepatic enzyme increased      Hepatic failure  
 Hepatic function abnormal    Hepatitis    Hepatocellular injury  
 Hepatomegaly    Herpes simplex    Herpes virus infection  
 Hiccups    Hirsutism    Homicidal ideation      Hordeolum  
 Hostility    Hunger      Hypercapnia    Hyperhidrosis  
 Hyperkinesia    Hyperprolactinaemia      Hypersensitivity  
 Hypersomnia    Hypertension      Hypertonia    Hyperventilation  
 Hypoaesthesia    Hypochromic anaemia      Hypokinesia    Hypomania  
 Hyponatraemia    Hypopnoea    Hyporeflexia      Hypotension  
 Hypothermia    Hypotonia    Hypoventilation    Hypoxia    Ill-defined  
 disorder    Illusion    Inappropriate antidiuretic hormone secretion  
 Incontinence      Increased appetite      Induration    Infection  
 Infectious mononucleosis      Infestation    Inflammation  
 Influenza    Injection site pain      Injection site reaction  
 Insomnia    Intraocular pressure increased      Irritability  
 Jaundice    Joint swelling    Laryngitis    Laryngospasm  
 Lethargy    Leukocytosis      Leukopenia    Libido decreased  
 Libido increased    Liver function test abnormal    Liver injury  
 Local reaction    Logorrhoea    Loss of consciousness    Loss of  
 libido    Lung disorder    Lymphadenopathy    Major depression  
 Malaise    Mania    Mean arterial pressure    Mediastinal disorder  
 Melaena    Memory impairment    Menstrual disorder  
 Menstruation irregular    Mental disability    Mental disorder  
 Mental retardation      Micturition urgency      Migraine  
 Miosis    Mood swings    Motion sickness    Movement disorder  
 Muscle relaxant therapy      Muscle rigidity    Muscle spasms  
 Muscle spasticity    Muscle twitching    Muscular weakness  
 Musculoskeletal discomfort    Musculoskeletal disorder  
 Musculoskeletal stiffness    Myalgia      Mydriasis    Myoclonus  
 Nasal congestion    Nasopharyngitis    Nausea      Neck pain

Necrosis Nervous system disorder Nervousness Neuritis  
 Neuroleptic malignant syndrome Neuropathy peripheral  
 Neutropenia Nightmare Nocturia Nodal rhythm Nodule  
 Nystagmus Obstruction Obstructive airways disorder Oedema  
 Oedema peripheral Oliguria Oropharyngeal pain Orthostatic  
 hypotension Osteoarthritis Otitis media Pain Pain in extremity  
 Pain in jaw Pallor Palpitations Pancytopenia  
 Paraesthesia Paraesthesia oral Paralysis Paresis  
 Pelvic pain Penile discharge Pericardial effusion Periorbital  
 oedema Personality disorder Phaeochromocytoma Pharyngitis  
 Phlebitis Photophobia Photosensitivity reaction  
 Pigmentation disorder Platelet count decreased Pleurisy  
 Pneumonia Pneumothorax Pollakiuria Polyuria Post-  
 traumatic stress disorder Precocious puberty Premenstrual  
 syndrome Presyncope Proctalgia Prothrombin level increased  
 Pruritus Psychomotor retardation Psychotic disorder  
 Puberty Pulmonary congestion Pulmonary function test  
 decreased Pulmonary haemorrhage Pulmonary hypertension Pulmonary  
 oedema Purpura Rash Rash maculo-papular Rectal  
 haemorrhage Rectal tenesmus Renal failure Respiratory arrest  
 Respiratory depression Respiratory disorder Respiratory  
 failure Respiratory moniliasis Respiratory rate decreased  
 Respiratory tract congestion Respiratory tract infection  
 Retching Retrograde amnesia Rhinitis allergic Rhinorrhoea  
 Rhonchi Salivary hypersecretion Scotoma Sedation  
 Sexual dysfunction Shock Sinus tachycardia Sinusitis Skin  
 burning sensation Skin discolouration Skin disorder Skin  
 exfoliation Skin necrosis Sleep apnoea syndrome Sleep disorder  
 Sleep talking Sluggishness Sneezing Somnambulism  
 Somnolence Speech disorder Stevens-Johnson syndrome  
 Stomatitis Strabismus Stridor Stupor Substance abuse  
 Suicidal ideation Swelling Swelling face Swollen tongue  
 Syncope Tachycardia Tachypnoea Tenderness Tendonitis  
 Tension Therapeutic response decreased Thinking abnormal  
 Thirst Thrombocytopenia Thrombocytosis Thrombophlebitis  
 Thrombosis Thyroid neoplasm Tinnitus Tongue coated  
 Tongue disorder Tongue oedema Tooth disorder Toothache  
 Toxic epidermal necrolysis Transaminases increased  
 Tremor Tropical spastic paresis Ulcer Upper airway  
 obstruction Upper respiratory tract infection Urethral disorder  
 Urinary hesitation Urinary incontinence Urinary retention  
 Urinary tract disorder Urinary tract infection Urine  
 colour abnormal Urine output increased Urticaria Vaginal discharge  
 Vaginal infection Vaginal inflammation Vascular purpura  
 Vasodilation procedure Venous thrombosis Ventricular arrhythmia  
 Ventricular extrasystoles Vertigo Viral infection  
 Vision blurred Visual acuity reduced Visual impairment  
 Vomiting Weight decreased Weight increased Wheezing  
 Withdrawal syndrome Xeroderma Xerophthalmia Yawning

\*\*\*\*\*  
 \*\*\*\*\*

Phospholipase A2, membrane associated - Group: Enzyme

Treated with:

indomethacin: approved small molecule (164 associated side  
 effects) For moderate to severe rheumatoid arthritis including

acute flares of chronic disease, ankylosing spondylitis, osteoarthritis, acute painful shoulder (bursitis and/or tendinitis) and acute gouty arthritis.

diclofenac: approved small molecule (310 associated side effects) For the acute and chronic treatment of signs and symptoms of osteoarthritis and rheumatoid arthritis.

ginkgo biloba: approved, nutraceutical small molecule (0 associated side effects) Appears to be effective in: alleviating age-related memory impairment in some elderly people with mild to moderate age-related memory or cognitive impairment; improving cognitive function in healthy young to middle-aged people; improving symptoms of Alzheimer's, vascular or mixed dementia; improving damage to the visual field in patients with normal tension glaucoma; decreasing the number of painful attacks in patients with Raynaud's syndrome; and may improve symptoms of vertigo and dizziness in some patients.

1,4-butanediol: experimental small molecule (0 associated side effects)

1-{2-[2-(2-methoxyethoxy)ethoxy]ethoxy}-4-(1,1,3,3-tetramethylbutyl)benzene: experimental small molecule (0 associated side effects)

n-tridecanoic acid: experimental small molecule (0 associated side effects)

[3-(1-benzyl-3-carbamoylmethyl-2-methyl-1h-indol-5-yloxy)-propyl]-phosphonic acid: experimental small molecule (0 associated side effects)

4-(1-benzyl-3-carbamoylmethyl-2-methyl-1h-indol-5-yloxy)-butyric acid: experimental small molecule (0 associated side effects)

1-benzyl-5-methoxy-2-methyl-1h-indol-3-yl)-acetic acid: experimental small molecule (0 associated side effects)

6-phenyl-4(r)-(7-phenyl-heptanoylamino)-hexanoic acid: experimental small molecule (0 associated side effects)

elaidoylamide: experimental small molecule (0 associated side effects)

1-octadecyl-2-acetamido-2-deoxy-sn-glycerol-3-phosphoethylmethyl sulfide: experimental small molecule (0 associated side effects)

(s)-5-(4-benzyloxy-phenyl)-4-(7-phenyl-heptanoylamino)-pentanoic acid: experimental small molecule (0 associated side effects)

suramin: approved small molecule (0 associated side effects)  
For treatment of human sleeping sickness, onchocerciasis and other diseases caused by trypanosomes and worms.

369 known side effects mediated through drugs targeting this protein:

Abdominal discomfort Abdominal distension Abdominal pain upper  
Abscess Acidosis Acne Acute coronary syndrome  
Agitation Agranulocytosis Alanine aminotransferase increased  
Alkalosis Alopecia Amblyopia Anaemia Anaphylactic  
shock Anaphylactoid reaction Angina pectoris Angioedema Angiopathy  
Anorectal discomfort Anorectal disorder Anxiety  
Aortic dissection Apathy Aphasia Aphthous stomatitis  
Aplastic anaemia Apnoea Application site reaction  
Arrhythmia Arteriosclerosis Arthralgia Aspartate  
aminotransferase increased Asthenia Asthma Atrophy

Azotaemia Back pain Bladder pain Bleeding time  
 prolonged Blindness Blister Blood creatine phosphokinase  
 increased Blood creatinine increased Blood potassium increased  
 Body temperature increased Bone pain Bradycardia Breast  
 disorder Breath odour Bronchitis Burning sensation Cardiac  
 disorder Cardiac failure Cardiac failure congestive  
 Cardiovascular disorder Cellulitis gangrenous  
 Cerebrovascular accident Chest pain Chills  
 Coagulopathy Colitis Colitis ulcerative Coma  
 Confusional state Conjunctival hyperaemia Conjunctivitis  
 allergic Constipation Convulsion Coordination abnormal  
 Corneal deposits Corneal disorder Corneal erosion Corneal  
 infiltrates Corneal oedema Corneal opacity Cough Crohn's disease  
 Cystitis Cystitis noninfective Deafness Death Decreased  
 appetite Dental caries Depersonalisation Dermatitis Dermatitis  
 bullous Dermatitis contact Dermatitis exfoliative Diarrhoea  
 Diarrhoea haemorrhagic Diplopia Discomfort Disorientation  
 Disseminated intravascular coagulation Disturbance in  
 attention Diverticulum Dizziness Drug ineffective Dry mouth  
 Dry skin Dysarthria Dysgeusia Dyskinesia Dyspepsia  
 Dyspnoea Dysthymic disorder Dysuria Ear pain  
 Ecchymosis Eczema Electrolyte imbalance Enterocolitis  
 Enterocolitis haemorrhagic Eosinophilia Epilepsy  
 Epistaxis Erectile dysfunction Eructation Erythema  
 Erythema multiforme Erythema nodosum Erythema of eyelid  
 Eye allergy Eye disorder Eye inflammation Eye irritation  
 Eye pain Eye pruritus Eyelid oedema Eyelids pruritus  
 Face oedema Fasciitis Fatigue Feeling abnormal Fibrosis  
 Flat affect Flatulence Fluid retention Flushing Furuncle  
 Gait disturbance Gastric disorder Gastric pH decreased  
 Gastric perforation Gastritis Gastroenteritis  
 Gastrointestinal disorder Gastrointestinal haemorrhage  
 Gastrointestinal pain Gingivitis Glossitis Glycosuria Gout  
 Gynaecomastia Haematemesis Haematuria Haemoglobin  
 Haemolytic anaemia Haemorrhage intracranial  
 Haemorrhoids Hair disorder Hallucination Headache  
 Hearing impaired Henoch-Schonlein purpura Hepatic cirrhosis  
 Hepatic enzyme increased Hepatic failure Hepatic function  
 abnormal Hepatic necrosis Hepatitis Hepatitis fulminant  
 Hepatobiliary disease Hepatorenal syndrome Hereditary  
 disorder Hernia Herpes simplex Herpes virus infection  
 Hyperaemia Hyperaesthesia Hyperchlorhydria  
 Hypercholesterolaemia Hyperglycaemia Hyperhidrosis  
 Hyperkalaemia Hyperkinesia Hypersensitivity  
 Hypertension Hypertonia Hypertrophy Hyperventilation  
 Hypoaesthesia Hypoglycaemia Hypokinesia Hyponatraemia  
 Hypotension Ileitis Ileus Ill-defined disorder Immune  
 system disorder Infarction Infection Infestation Influenza  
 Insomnia Intestinal perforation Intestinal ulcer Intraocular  
 pressure increased Iritis Irritability Jaundice  
 Keratitis Lacrimal disorder Lacrimation increased Laryngeal  
 oedema Laryngitis Laryngospasm Leukaemia Leukopenia Lip  
 swelling Loss of consciousness Lung infection Lymphadenopathy  
 Macule Malaise Melaena Memory impairment Meningitis  
 aseptic Mental disability Mental disorder Migraine Mouth

ulceration Muscle rigidity Muscle spasms Muscular weakness  
 Musculoskeletal discomfort Musculoskeletal pain  
 Musculoskeletal stiffness Myalgia Myocardial infarction  
 Nail disorder Nausea Neck pain Necrosis Necrotising  
 colitis Necrotising enterocolitis neonatalNecrotising fasciitis  
 Neoplasm malignant Nephritic syndrome Nephritis  
 Nephropathy Nephrotic syndrome Nervous system disorder  
 Nervousness Neuritis Neuropathy peripheral Night blindness  
 Nightmare Nocturia Nodule Nuchal rigidity Obstruction  
 Ocular hyperaemiaOedema Oedema peripheralOesophageal  
 disorder Oesophagitis Oliguria Osteoarthritis Pain  
 Palpitations Pancreatitis Pancytopenia Papule  
 Paraesthesia Peptic ulcer Petechiae Pharyngitis  
 Phlebitis Photosensitivity reaction Platelet aggregation  
 decreased Platelet count decreased Pneumonia Pneumothorax  
 Pollakiuria Polyuria Proctalgia Proctitis Prostatic  
 specific antigen increased Protein urine present Proteinuria  
 Pruritus Psychotic disorder Pulmonary function test  
 decreased Pulmonary haemorrhage Pulmonary hypertension Pulmonary  
 oedema Punctate keratitis Purpura Rash Rash maculo-  
 papular Rash pustular Rectal haemorrhage Rectal tenesmus  
 Renal failure Renal failure acute Renal impairment Renal  
 papillary necrosis Respiratory depression Respiratory disorder  
 Retinopathy of prematurity Rhinitis Scotoma Seborrhoeic  
 dermatitis Sepsis Shock Sinusitis Skin cancer Skin  
 discolouration Skin exfoliation Skin hypertrophy Skin irritation  
 Skin mass Skin odour abnormal Skin ulcer Sleep disorder  
 Social avoidant behaviour Somnolence Speech disorder  
 Stevens-Johnson syndrome Stomatitis Swelling Syncope  
 Tachycardia Tension Testicular disorder Thinking abnormal  
 Thirst Thrombocytopenia Thrombocytopenic purpura  
 Thrombophlebitis Tic Tinnitus Tongue coated Tooth  
 abscess Toxic epidermal necrolysis Tremor  
 Tubulointerstitial nephritis Ulcer Ulcerative keratitis  
 Urethral disorderUrinary tract disorder Urine output increased  
 Urticaria Vaginal haemorrhage Vascular purpura Vasculitis  
 Vasodilation procedure Ventricular extrasystoles Vertigo  
 Viral infection Vision blurred Visual acuity reduced  
 Visual impairmentVitreous floatersVomiting Weight decreased  
 Weight increased

\*\*\*\*\*  
 \*\*\*\*\*

Acetylcholine receptor subunit delta - Group: Channel

Treated with:

galantamine: approved small molecule (160 associated side effects) For the treatment of mild to moderate dementia of the Alzheimer's type. Has also been investigated in patients with mild cognitive impairment who did not meet the diagnostic criteria for Alzheimer's disease.

160 known side effects mediated through drugs targeting this protein:

Abdominal discomfort Abdominal pain Aggression Agitation  
 Anaemia Anxiety Apathy Aphasia Apraxia  
 Arrhythmia Arrhythmia supraventricular Arthralgia Arthritis



Asthenia Ataxia Atrial fibrillation Atrioventricular  
 block Back pain Bladder pain Blood alkaline phosphatase  
 increased Blood urea increased Body temperature increased Bone  
 pain Bradycardia Bronchitis Bundle branch block Cardiac failure  
 Cardiac fibrillation Cardiovascular disorder Cataract  
 Cerebrovascular accident Cerebrovascular disorder Chest  
 pain Coagulopathy Completed suicide Confusional state  
 Constipation Convulsion Cough Cystitis Cystitis  
 noninfective Decreased appetite Dehydration Delirium  
 Depression Dermatitis Diarrhoea Discomfort Disturbance in  
 sexual arousal Diverticulitis Dizziness Dry mouth Dysgeusia  
 Dyspepsia Dysphagia Electrocardiogram QT prolonged  
 Electrocardiogram T wave inversion Epistaxis Eye disorder  
 Fatigue Feeling abnormal Flat affect Flatulence Gastric  
 disorder Gastritis Gastroenteritis Gastrointestinal haemorrhage  
 Gastrointestinal pain Gravitational oedema Haematuria  
 Haemoglobin Haemorrhage Hallucination Headache Hepatic  
 enzyme increased Hepatitis Hepatobiliary disease Hiccups  
 Hyperglycaemia Hyperkinesia Hypersensitivity Hypersomnia  
 Hypertension Hypertonia Hypokalaemia Hypokinesia  
 Hypotension Ill-defined disorder Immune system disorder  
 Incontinence Infarction Infection Insomnia Ischaemia  
 Lethargy Libido increased Liver disorder Loss of  
 consciousness Lower gastrointestinal haemorrhage Malaise  
 Melaena Mental disorder Muscle contractions involuntary  
 Muscle spasms Musculoskeletal discomfort Musculoskeletal  
 disorder Myalgia Myocardial ischaemia Nausea  
 Nephrolithiasis Nervous system disorder Nervousness  
 Neuropathy peripheral Nightmare Nocturia Oedema  
 Oedema peripheral Oesophageal disorder Oesophageal  
 perforation Orthostatic hypotension Pain in extremity  
 Palpitations Paraesthesia Paranoia Pneumonia  
 Pollakiuria Purpura Rash Rectal haemorrhage Renal  
 failure Respiratory disorder Respiratory tract infection  
 Rhinitis Salivary hypersecretion Shock Somnolence  
 Suicidal ideation Suicide attempt Supraventricular tachycardia  
 Syncope Tachycardia Tension Thrombocytopenia  
 Thrombocytosis Tinnitus Transient ischaemic attack  
 Tremor Upper respiratory tract infection Urethral disorder  
 Urinary incontinence Urinary retention Urinary tract disorder  
 Urinary tract infection Vascular dementia Vascular purpura  
 Ventricular tachycardia Vertigo Vision blurred  
 Vomiting Weight decreased

\*\*\*\*\*  
 \*\*\*\*\*

ATP-binding cassette transporter sub-family C member 11 - Group:  
 Transporter

Treated with:

folic acid: approved, nutraceutical small molecule (0 associated  
 side effects) For treatment of folic acid deficiency,  
 megaloblastic anemia and in anemias of nutritional supplements,  
 pregnancy, infancy, or childhood.

conjugated estrogens: approved small molecule (219 associated  
 side effects) For the treatment of moderate to severe vasomotor  
 symptoms associated with the menopause, atrophic vaginitis,

osteoporosis, hypoestrogenism due to hypogonadism, castration, primary ovarian failure, breast cancer (for palliation only), and Advanced androgen-dependent carcinoma of the prostate (for palliation only)

indomethacin: approved small molecule (164 associated side effects) For moderate to severe rheumatoid arthritis including acute flares of chronic disease, ankylosing spondylitis, osteoarthritis, acute painful shoulder (bursitis and/or tendinitis) and acute gouty arthritis.

methotrexate: approved small molecule (209 associated side effects) For the treatment of gestational choriocarcinoma, chorioadenoma destruens and hydatidiform mole. Also for the treatment of severe psoriasis and severe, active, classical or definite rheumatoid arthritis.

probenecid: approved small molecule (27 associated side effects) For the reduction of serum uric acid concentrations in chronic gouty arthritis and tophaceous gout in patients with frequent disabling gout attacks. Has also been effectively used to promote uric acid excretion in hyperuricemia secondary to the administration of thiazide and related diuretics.

cyclic adenosine monophosphate: experimental small molecule (0 associated side effects)

taurocholic acid: experimental small molecule (0 associated side effects)

429 known side effects mediated through drugs targeting this protein:

5q minus syndrome  
Abdominal discomfort Abdominal distension  
Abdominal pain Abdominal pain upper Abscess Acidosis  
Acne Acute coronary syndrome Affect lability Aggression  
Agitation Agranulocytosis Alkalosis Alopecia Alveolitis  
Alveolitis allergic Amenorrhoea Anaemia Anaphylactic  
shock Anaphylactoid reaction Angioedema Angiopathy Anorectal  
discomfort Anxiety Apathy Aphasia Aplastic anaemia  
Apnoea Arrhythmia Arterial thrombosis Arthralgia  
Arthropathy Asthenia Asthma Ataxia Azoospermia  
Azotaemia Back pain Benign neoplasm Bladder pain  
Blindness Blindness transient Blood albumin decreased  
Blood creatinine increased Blood glucose decreased Blood  
glucose increased Blood potassium increased Blood pressure  
increased Blood triglycerides increased Blood uric acid  
increased Body temperature increased Bone disorder Bone pain  
Bradycardia Breast discharge Breast discomfort Breast disorder  
Breast enlargement Breast mass Breast neoplasm Breast pain  
Breast swelling Breast tenderness Bronchitis Candidiasis  
Carbohydrate tolerance decreased Cardiac failure Cardiac  
failure congestive Cell death Cellulitis gangrenous Cerebral  
artery thrombosis Cerebral thrombosis Cerebrovascular accident  
Cervical discharge Cervix disorder Chest pain Chills  
Chloasma Chorea Coagulopathy Cognitive disorder  
Colitis ischaemic Colitis ulcerative Coma Confusional state  
Conjunctivitis Connective tissue disorder Constipation  
Convulsion Corneal deposits Coronary artery thrombosis Cough  
Crohn's disease Cryptococcosis Cyanosis Cystitis  
Cystitis noninfective Cytomegalovirus infection Deafness

Death Decreased appetite Deep vein thrombosis Dementia  
 Dental plaque Depersonalisation Depression Dermatitis  
 Dermatitis exfoliative Diabetes mellitus Diarrhoea Diplopia  
 Discomfort Disseminated intravascular coagulation  
 Diverticulum Dizziness Drug interaction Dry eye  
 Dysarthria Dyskinesia Dysmenorrhoea Dyspepsia Dysplasia  
 Dyspnoea Dysuria Ear pain Ecchymosis Ectropion of  
 cervix Effusion Electrolyte imbalance Embolism Embolism  
 venous Encephalopathy Endometrial cancer Endometrial  
 hypertrophy Endometriosis Enteritis Enterocolitis  
 Eosinophilia Epilepsy Epistaxis Erectile dysfunction  
 Erythema Erythema multiforme Erythema nodosum  
 Extravasation Eye disorder Fasciitis Fatigue  
 Febrile neutropenia Feeling abnormal Fibrocystic breast  
 disease Fibrosis Flat affect Flatulence Fluid retention  
 Flushing Folliculitis Furuncle Galactorrhoea  
 Gallbladder disorder Gastric disorder Gastric perforation  
 Gastroenteritis Gastrointestinal disorder Gastrointestinal  
 haemorrhage Gastrointestinal pain Gastrointestinal toxicity  
 Generalised oedema Genital discharge Gingival pain  
 Gingivitis Glossitis Glucose tolerance decreased Glucose  
 tolerance impaired Glycosuria Gynaecomastia Haemangioma  
 Haematemesis Haematocrit decreased Haematuria Haemoglobin  
 Haemolytic anaemia Haemoptysis Haemorrhage intracranial  
 Haemorrhagic disorder Headache Hemiparesis Hepatic cirrhosis  
 Hepatic enzyme increased Hepatic failure Hepatic function  
 abnormal Hepatic necrosis Hepatitis Hepatitis acute  
 Hepatobiliary disease Herpes virus infection Herpes zoster  
 Hirsutism Histoplasmosis Hyperbilirubinaemia  
 Hypercalcaemia Hyperglycaemia Hyperhidrosis  
 Hyperkalaemia Hyperlipidaemia Hypernatraemia  
 Hypersensitivity Hypertension Hypertonia  
 Hypertriglyceridaemia Hypertrophy Hyperuricaemia  
 Hypoaesthesia Hypocalcaemia Hypogammaglobulinaemia  
 Hypoglycaemia Hyponatraemia Hypotension Hypothyroidism  
 Ileitis Ileus Ill-defined disorder Infarction Infection  
 Infertility Inflammation Influenza Injection site pain  
 Insomnia Interstitial lung disease Intestinal ulcer  
 Intra-uterine death Irritability Jaundice Jaundice  
 cholestatic Lacrimal disorder Lacrimation increased Laryngitis  
 Leiomyoma Lethargy Leukaemia Leukoencephalopathy  
 Leukopenia Liver function test abnormal Loss of consciousness  
 Loss of libido Lung disorder Lung infection  
 Lymphadenopathy Lymphoma Lymphoproliferative disorder  
 Macule Maculopathy Malaise Mass Melaena Meningioma  
 benign Meningitis Meningitis aseptic Menorrhagia Menstrual  
 disorder Mental disorder Metrorrhagia Migraine Mood swings  
 Mouth ulceration Muscle rigidity Muscle spasms Muscular  
 weakness Musculoskeletal discomfort Musculoskeletal pain  
 Musculoskeletal stiffness Myalgia Myocardial infarction  
 Nausea Neck pain Necrosis Necrotising colitis  
 Necrotising enterocolitis neonatal Necrotising fasciitis  
 Neoplasm Neoplasm malignant Nephritic syndrome  
 Nephritis Nephropathy Nephrotic syndrome Nerve root lesion  
 Nervous system disorder Nervousness Neuritis Neuropathy

peripheral Neutropenia Nipple pain Nocardiosis Nodule Nuchal  
rigidity Obstruction Obstructive airways disorder Oedema  
Oedema peripheral Oesophageal disorder Oliguria  
Opportunistic infection Optic neuritis Osteoarthritis  
Osteonecrosis Osteoporosis Ovarian cancer Pain in  
extremity Palpitations Pancreatic disorder Pancreatitis  
Pancytopenia Paraesthesia Paresis Pelvic pain  
Peptic ulcer Pericardial effusion Pericarditis  
Petechiae Pharyngitis Phlebitis Photosensitivity reaction  
Pigmentation disorder Platelet aggregation decreased  
Platelet count decreased Pleural disorder Pleural effusion  
Pneumocystis jiroveci pneumonia Pneumonia Pneumonia  
cytomegaloviral Pneumothorax Pollakiuria Polyuria Porphyria  
Precocious puberty Proctalgia Proctitis Productive cough  
Protein urine present Proteinuria Pruritus genital Psychotic  
disorder Puberty Pulmonary embolism Pulmonary fibrosis  
Pulmonary function test decreased Pulmonary haemorrhage  
Pulmonary hypertension Pulmonary oedema Pulmonary toxicity  
Purpura Radiculopathy Rales Rash generalised Rectal  
haemorrhage Rectal tenesmus Renal colic Renal failure Renal  
failure acute Renal tubular disorder Respiratory depression  
Respiratory failure Respiratory tract infection Retinal  
vein thrombosis Retinitis pigmentosa Retinopathy of prematurity  
Rhinitis Sensory loss Sepsis Shock Sinusitis Skin  
burning sensation Skin exfoliation Skin necrosis Skin ulcer Smear  
cervix abnormal Soft tissue necrosis Somnolence Speech disorder  
Spinal cord disorder Stomatitis Subcutaneous nodule  
Sudden death Swelling Syncope Tachycardia  
Telangiectasia Tenderness Tension Thrombocytopenia  
Thrombocytopenic purpura Thrombophlebitis superficial  
Thrombosis Tinnitus Tooth abscess Toxic epidermal  
necrolysis Tubulointerstitial nephritis Tumour lysis syndrome Ulcer  
Upper respiratory tract infection Ureteric obstruction  
Urethral disorder Urinary tract disorder Urine output increased  
Urticaria Uterine cancer Uterine cervical erosion  
Uterine leiomyoma Uterine spasm Vaginal discharge Vaginal  
haemorrhage Varicose vein Vascular purpura Vasculitis  
Vasodilation procedure Venous thrombosis Vertigo Vision  
blurred Visual acuity reduced Visual impairment Vomiting  
Vulvovaginal candidiasis Vulvovaginal mycotic infection  
Vulvovaginal pruritus Weight increased Withdrawal bleed X-  
linked lymphoproliferative syndrome

\*\*\*\*\*  
\*\*\*\*\*

Muscarinic acetylcholine receptor M4 - Group: Receptor

Treated with:

ziprasidone: approved small molecule (251 associated side effects) For the treatment of schizophrenia and related psychotic disorders.

amitriptyline: approved small molecule (109 associated side effects) For the treatment of depression, chronic pain, irritable bowel syndrome, sleep disorders, diabetic neuropathy, agitation and insomnia, and migraine prophylaxis.

olanzapine: approved small molecule (393 associated side effects) For the acute and maintenance treatment of schizophrenia

and related psychotic disorders, as well as acute treatment of manic or mixed episodes of bipolar 1 disorder. Intramuscular olanzapine is indicated for the rapid control of agitated patients.

metixene: approved small molecule (0 associated side effects)

Used for the symptomatic treatment of parkinsonism.

clozapine: approved small molecule (228 associated side effects) For use in patients with treatment-resistant schizophrenia.

trihexyphenidyl: approved small molecule (43 associated side effects) Indicated for the treatment of parkinson's disease and extrapyramidal reactions caused by drugs.

procyclidine: approved small molecule (0 associated side effects) For the treatment of all forms of Parkinson's Disease, as well as control of extrapyramidal reactions induced by antipsychotic agents.

promazine: approved small molecule (0 associated side effects)

Used as an adjunct for short term treatment of moderate and severe psychomotor agitation. Also used to treat agitation or restlessness in the elderly.

hyoscyamine: approved small molecule (0 associated side effects) For treatment of bladder spasms, peptic ulcer disease, diverticulitis, colic, irritable bowel syndrome, cystitis, and pancreatitis. Also used to treat certain heart conditions, to control the symptoms of Parkinson's disease and rhinitis.

imipramine: approved small molecule (100 associated side effects) For the relief of symptoms of depression and as temporary adjunctive therapy in reducing enuresis in children aged 6 years and older. May also be used to manage panic disorders, with or without agoraphobia, as a second line agent in ADHD, management of eating disorders, for short-term management of acute depressive episodes in bipolar disorder and schizophrenia, and for symptomatic treatment of postherpetic neuralgia.

darifenacin: approved small molecule (69 associated side effects) For the treatment of overactive bladder with symptoms of urge urinary incontinence, urgency and frequency.

nortriptyline: approved small molecule (91 associated side effects) For the treatment of depression, chronic pain, irritable bowel syndrome, sleep disorders, diabetic neuropathy, agitation and insomnia, and migraine prophylaxis.

atropine: approved small molecule (161 associated side effects) For the treatment of poisoning by susceptible organophosphorous nerve agents having cholinesterase activity as well as organophosphorous or carbamate insecticides.

nicardipine: approved small molecule (107 associated side effects) Used for the management of patients with chronic stable angina and for the treatment of hypertension.

paroxetine: approved small molecule (505 associated side effects) Labeled indications include: major depressive disorder (MDD), panic disorder with or without agoraphobia, obsessive-compulsive disorder (OCD), social anxiety disorder (social phobia), generalized anxiety disorder (GAD), post-traumatic stress disorder (PTSD), and premenstrual dysphoric disorder (PMDD). Unlabeled indications include: eating disorders, impulse control disorders, vasomotor symptoms of menopause, obsessive-compulsive disorder (OCD)

in children, and mild dementia-associated agitation in nonpsychotic individuals.

homatropine methylbromide: approved small molecule (0 associated side effects) Used in conjunction with antacids or histamine H<sub>2</sub>-receptor antagonists in the treatment of peptic ulcers, gastric ulcers and duodenal ulcers, to reduce further gastric acid secretion and delay gastric emptying.

scopolamine: approved small molecule (22 associated side effects) For the treatment of excessive salivation, colicky abdominal pain, bradycardia, sialorrhoea, diverticulitis, irritable bowel syndrome and motion sickness.

benzquinamide: approved small molecule (0 associated side effects) Used to prevent and treat nausea and vomiting associated with anesthesia and surgery, administered intramuscularly or intravenously.

propiomazine: approved small molecule (0 associated side effects) Propiomazine is largely used for its antihistaminic sleep inducing effects in treating insomnia.

cryptenamine: approved small molecule (0 associated side effects) For the treatment of hypertension.

tropicamide: approved small molecule (14 associated side effects) Indicated to induce mydriasis (dilation of the pupil) and cycloplegia (paralysis of the ciliary muscle of the eye) in diagnostic procedures, such as measurement of refractive errors and examination of the fundus of the eye.

brompheniramine: approved small molecule (27 associated side effects) For the treatment of the symptoms of the common cold and allergic rhinitis, such as runny nose, itchy eyes, watery eyes, and sneezing.

maprotiline: approved small molecule (0 associated side effects) For treatment of depression, including the depressed phase of bipolar depression, psychotic depression, and involuntional melancholia, and may also be helpful in treating certain patients suffering severe depressive neurosis.

tolterodine: approved small molecule (51 associated side effects) For the treatment of overactive bladder (with symptoms of urinary frequency, urgency, or urge incontinence).

promethazine: approved small molecule (80 associated side effects) For the treatment of allergic disorders, and nausea/vomiting.

doxepin: approved small molecule (210 associated side effects) Labeled indications: depression and insomnia. Unlabeled indications: chronic and neuropathic pain, anxiety, idiopathic urticaria.

desipramine: approved small molecule (120 associated side effects) For relief of symptoms in various depressive syndromes, especially endogenous depression. It has also been used to manage chronic peripheral neuropathic pain, as a second line agent for the management of anxiety disorders (e.g. panic disorder, generalized anxiety disorder), and as a second or third line agent in the ADHD management.

quetiapine: approved small molecule (359 associated side effects) For the treatment of schizophrenia and related psychotic disorders.

aripiprazole: approved small molecule (630 associated side effects) For the treatment of schizophrenia and related psychotic disorders.

chlorprothixene: approved small molecule (0 associated side effects) For treatment of psychotic disorders (e.g. schizophrenia) and of acute mania occurring as part of bipolar disorders.

methotrimeprazine: approved small molecule (0 associated side effects) For the treatment of psychosis, particular those of schizophrenia, and manic phases of bipolar disorder.

solifenacin: approved small molecule (56 associated side effects) For the treatment of overactive bladder with symptoms of urge urinary incontinence, urgency, and urinary frequency.

isopropamide: approved small molecule (0 associated side effects) For the treatment of a wide range of gastrointestinal disorders, including such conditions as peptic ulcer, gastritis, hyperchlorhydria, functional diarrhea, irritable or spastic colon, pyloroduodenal irritability, pylorospasm, acute nonspecific gastroenteritis, biliary dyskinesia and chronic cholelithiasis, duodenitis, gastrointestinal spasm; it may also be used to treat genitourinary spasm.

fesoterodine: approved small molecule (50 associated side effects) For the treatment of overactive bladder (with symptoms of urinary frequency, urgency, or urge incontinence).

1017 known side effects mediated through drugs targeting this protein:

Abasia Abdominal discomfort Abdominal distension Abdominal pain  
 Abdominal pain lower Abdominal pain upper Abdominal tenderness  
 Abnormal dreams Abnormal faeces Abscess Accommodation disorder  
 Acidosis Acne Acute coronary syndrome Acute psychosis  
 Adenocarcinoma Adjustment disorder Affect lability Ageusia  
 Aggression Agitation Agoraphobia Agranulocytosis Akathisia  
 Akinesia Alanine aminotransferase increased Albuminuria  
 Alcohol abuse Alcohol intolerance Alkalosis Alopecia  
 Altered state of consciousness Alveolitis allergic Amblyopia  
 Amenorrhoea Amnesia Anaemia Anaemia macrocytic Anaphylactic shock  
 Anaphylactoid reaction Anger Angina pectoris Angioedema  
 Angiopathy Angle closure glaucoma Anhidrosis Anisocytosis  
 Anorectal disorder Anorgasmia Antinuclear antibody positive  
 Antisocial behaviour Antisocial personality disorder Anxiety  
 Aortic dissection Apathy Aphasia Aphthous stomatitis Aplasia  
 Aplastic anaemia Apnoea Appendicitis Application site reaction  
 Arrhythmia Arrhythmia supraventricular Arteriosclerosis  
 Arteritis Arthralgia Arthritis Arthropathy Asocial behaviour  
 Aspartate aminotransferase increased Asphyxia Aspiration  
 Assisted fertilisation Asthenia Asthma Ataxia Atelectasis  
 Athetosis Atrial fibrillation Atrial flutter Atrioventricular  
 block first degree Atrioventricular dissociation Atrophy  
 Azoospermia Azotaemia Back pain Balance disorder Basophilia  
 Benign prostatic hyperplasia Bladder dilatation Bladder pain  
 Bleeding time prolonged Blepharitis Blepharospasm  
 Blindness Blister Blood alkaline phosphatase increased  
 Blood bilirubin increased Blood cholesterol increased Blood

creatine phosphokinase increased Blood creatinine increased Blood  
glucose decreased Blood glucose increased Blood insulin  
increased Blood lactate dehydrogenase increased Blood potassium  
decreased Blood potassium increased Blood pressure abnormal  
Blood pressure diastolic decreased Blood pressure fluctuation  
Blood pressure increased Blood pressure systolic decreased  
Blood prolactin increased Blood triglycerides increased  
Blood triglycerides normal Blood urea increased Blood uric  
acid increased Blood urine Blood urine present Blunted affect  
Body temperature decreased Body temperature increased Bone  
disorder Bone pain Bradycardia Bradykinesia Bradyphrenia  
Brain oedema Breast atrophy Breast cancer Breast cyst  
Breast disorder Breast enlargement Breast feeding  
Breast neoplasm Breast pain Bronchitis Bronchopneumopathy  
Bronchospasm Bruxism Buccoglossal syndrome Bulimia  
nervosa Bundle branch block Burning sensation Bursitis  
Cachexia Calculus urinary Candidiasis Carbohydrate tolerance  
decreased Cardiac arrest Cardiac disorder Cardiac failure  
Cardiac failure congestive Cardiac fibrillation Cardiac  
flutter Cardiac murmur Cardiac output decreased Cardio-  
respiratory arrest Cardiomegaly Cardiomyopathy  
Cardiopulmonary failure Cardiovascular disorder  
Carpal tunnel syndrome Cataplexy Cataract Catatonia Cells  
in urine Cellulitis Cerebellar syndrome Cerebral haemorrhage  
Cerebral infarction Cerebral ischaemia Cerebrovascular  
accident Cerebrovascular disorder Cervicitis Cervix disorder  
Chapped lips Cheilitis Chest discomfort Chest pain  
Chills Cholecystitis Cholelithiasis Cholestasis  
Cholinergic syndrome Chondropathy Chorea  
Choreoathetosis Chronic lymphocytic leukaemia Chronic  
obstructive pulmonary disease Clonus Coccydynia Cognitive  
disorder Cogwheel rigidity Cold sweat Colitis Colonic  
obstruction Coma Completed suicide Condition aggravated Confusional  
state Conjunctival disorder Conjunctival hyperaemia  
Conjunctival oedema Conjunctivitis Connective tissue  
disorder Constipation Conversion disorder Convulsion  
Coordination abnormal Corneal lesion Costochondritis Cough  
Crying Cyanosis Cycloplegia Cystitis Cystitis  
noninfective Deafness Death Decreased appetite Decubitus  
ulcer Deep vein thrombosis Deficiency anaemia Dehydration  
Delirium Delusion Dementia Dental caries Dependence  
Depersonalisation Depressed level of consciousness Depression  
Depressive symptom Derealisation Dermal cyst Dermatitis  
atopic Dermatitis bullous Dermatitis contact Dermatitis  
exfoliative Diabetes mellitus Diabetic coma Diabetic  
hyperglycaemic coma Diabetic hyperosmolar coma Diabetic  
ketoacidosis Diarrhoea Diarrhoea haemorrhagic Diplopia  
Discomfort Disease progression Disorientation  
Dissociation Disturbance in attention Disturbance in  
sexual arousal Diverticulitis Dizziness Dizziness exertional  
Dizziness postural Drooling Drug abuse Drug dependence  
Drug eruption Drug interaction Drug withdrawal syndrome  
Dry eye Dry mouth Dry skin Dry throat Duodenal ulcer  
Duodenitis Dysarthria Dysgeusia Dyskinesia Dysmenorrhoea  
Dyspepsia Dysphagia Dysphemia Dysphonia Dysphoria



Dyspnoea    Dystonia    Dysuria    Ear disorder    Ear  
 infection    Ear pain    Ecchymosis    Eclampsia    Eczema    Effusion  
 Ejaculation delayed    Ejaculation disorder    Elastosis  
 perforans    Elderly    Electrocardiogram QRS complex  
 Electrocardiogram QT prolonged    Electrocardiogram ST segment  
 Electrocardiogram ST segment depression    Electrocardiogram ST  
 segment elevation    Electrocardiogram T wave inversion    Electrocardiogram  
 abnormal    Electrocardiogram change    Electroencephalogram  
 abnormal    Elevated mood    Embolism    Emphysema    Encephalopathy  
 Endocrine disorder    Endometrial disorder    Energy increased  
 Enteritis    Enuresis    Eosinophilia    Epididymitis  
 Epilepsy    Epistaxis    Erectile dysfunction    Eructation  
 Erythema    Erythema multiforme    Erythema nodosum    Euphoric  
 mood    Exfoliative rash    Exophthalmos    Exostosis    Extensor plantar  
 response    Extrapyramidal disorder    Extrasystoles  
 Extravasation    Eye discharge    Eye disorder    Eye  
 haemorrhage    Eye infection    Eye inflammation    Eye irritation    Eye  
 pain    Eyelid disorder    Eyelid function disorder    Eyelid oedema  
 Eyelid ptosis    Face oedema    Facial pain    Facial paresis  
 Faecal incontinence    Faecalith    Faecaloma    Faeces hard  
 Fasting    Fatigue    Fear    Feeling abnormal    Feeling cold  
 Feeling hot    Feeling jittery    Female sexual dysfunction  
 Fibrocystic breast disease    Fibrosis    Flank pain    Flat affect  
 Flatulence    Fluid retention    Flushing    Folliculitis    Food  
 interaction    Formication    Fungal infection    Fungal skin infection  
 Furuncle    Gait disturbance    Galactorrhoea    Gamma-  
 glutamyltransferase increased    Gangrene    Gastric disorder  
 Gastric pH decreased    Gastric ulcer    Gastric ulcer  
 haemorrhage    Gastritis    Gastroenteritis    Gastrointestinal disorder  
 Gastrointestinal haemorrhage    Gastrointestinal pain  
 Gastrointestinal sounds abnormal    Gastrooesophageal reflux  
 disease    Generalised oedema    Genital discharge    Genital disorder  
 female    Genital disorder male    Gingival bleeding    Gingival  
 hyperplasia    Gingival pain    Gingival recession    Gingivitis  
 Glaucoma    Globulins increased    Glomerulonephritis  
 membranous    Glossitis    Glossodynia    Glucose tolerance decreased  
 Glucose tolerance impaired    Glycosuria    Glycosylated  
 haemoglobin increased    Goitre    Gout    Grand mal convulsion    Groin  
 pain    Gynaecomastia    Haematemesis    Haematochezia    Haematocrit  
 decreased    Haematoma    Haematuria    Haemoglobin    Haemoglobin decreased  
 Haemoglobin increased    Haemoglobinuria    Haemolysis    Haemolytic  
 anaemia    Haemoptysis    Haemorrhage    Haemorrhage intracranial  
 Haemorrhagic disorder    Haemorrhoids    Hallucination  
 Hallucination, auditory    Hallucination, visual    Hangover  
 Head discomfort    Headache    Hearing impaired    Heart disease  
 congenital    Heart rate irregular    Hemiparesis    Hemiplegia    Hepatic  
 enzyme increased    Hepatic failure    Hepatic function abnormal  
 Hepatic necrosis    Hepatic steatosis    Hepatitis    Hepatobiliary  
 disease    Hepatomegaly    Hepatosplenomegaly    Hernia  
 Herpes simplex    Herpes virus infection    Herpes zoster  
 Hiccups    Hirsutism    Homicidal ideation    Hormone level  
 abnormal    Hostility    Hot flush    Hyperacusis    Hyperaesthesia  
 Hyperbilirubinaemia    Hypercalcaemia    Hyperchloraemia  
 Hyperchlorhydria    Hypercholesterolaemia    Hyperglycaemia  
 Hyperhidrosis    Hyperinsulinism    Hyperkalaemia

Hyperkeratosis Hyperkinesia Hyperlipidaemia  
 Hypermagnesaemia Hypernatraemia Hyperparathyroidism  
 Hyperpathia Hyperphosphataemia Hyperplasia  
 Hyperprolactinaemia Hyperpyrexia Hyperreflexia  
 Hypersensitivity Hypersomnia Hypertension Hyperthermia  
 Hyperthyroidism Hypertonia Hypertonic bladder  
 Hypertriglyceridaemia Hypertrophy Hyperuricaemia  
 Hyperventilation Hypoaesthesia Hypoaesthesia oral  
 Hypocalcaemia Hypochloraemia Hypocholesterolaemia  
 Hypochromic anaemia Hypoglycaemia Hypohidrosis  
 Hypokalaemia Hypokinesia Hypomagnesaemia Hypomania  
 Hypomenorrhoea Hyponatraemia Hypophagia Hypophosphataemia  
 Hypoproteinaemia Hyporeflexia Hypotension Hypothermia  
 Hypothyroidism Hypotonia Hypoventilation Hypoxia  
 Idiopathic thrombocytopenic purpura Ileitis Ileus  
 paralytic Ill-defined disorder Immune system disorder  
 Immunoglobulins increased Impaired gastric emptying  
 Inappropriate antidiuretic hormone secretion Incontinence  
 Increased appetite Increased bronchial secretion  
 Induration Infarction Infection Infertility female  
 Infestation Inflammation Influenza Inguinal hernia  
 Injection site mass Injection site pain Injection site  
 phlebitis Injection site reaction Insomnia Intention tremor  
 Intentional self-injury Interstitial lung disease  
 Intestinal functional disorder Intestinal obstruction  
 Intestinal perforation Intraocular pressure increased Iron  
 deficiency Iron deficiency anaemia Irritability Irritable  
 bowel syndrome Ischaemia Ischaemic stroke Jaundice Jaundice  
 cholestatic Joint contracture Joint range of motion decreased Joint  
 stiffness Joint swelling Judgement impaired Keratitis  
 Keratoconjunctivitis sicca Ketoacidosis Ketosis  
 Lacrimation decreased Lacrimation increased Laryngeal  
 disorder Laryngitis Laryngospasm Left ventricular failure  
 Leiomyoma Lens disorder Lenticular opacities Lenticular  
 pigmentation Lethargy Leukaemia Leukocytosis Leukoderma  
 Leukopenia Leukoplakia oral Libido decreased Libido increased  
 Lip blister Lip dry Liver disorder Liver function test  
 abnormal Logorrhoea Loss of consciousness Loss of libido Lower  
 respiratory tract infection Lung adenocarcinoma stage I  
 Lymphadenitis Lymphadenopathy Lymphocyte count abnormal  
 Lymphocytic leukaemia Lymphocytosis Lymphoedema Lymphopenia  
 Major depression Malaise Male sexual dysfunction  
 Malignant melanoma Mania Masked facies Mass Mastitis  
 Mediastinal disorder Megacolon Melaena Memory impairment  
 Meningitis Menopausal symptoms Menorrhagia Menstrual  
 disorder Menstruation irregular Mental disability Mental disorder  
 Mental retardation Mental status changes Metrorrhagia  
 Microcytic anaemia Micturition disorder Micturition  
 urgency Migraine Miosis Mitral valve incompetence  
 Mobility decreased Monocytosis Mood swings Motion sickness  
 Mouth ulceration Movement disorder Muscle contractions  
 involuntary Muscle contracture Muscle enzyme increased  
 Muscle relaxant therapy Muscle rigidity Muscle spasms  
 Muscle tightness Muscle twitching Muscular weakness  
 Musculoskeletal chest pain Musculoskeletal discomfort

Musculoskeletal disorder      Musculoskeletal pain  
Musculoskeletal stiffness      Myalgia      Myasthenic syndrome  
Mydriasis      Myelitis      Myocardial infarction      Myocardial  
ischaemia      Myocarditis      Myoclonus      Myopathy      Myopia      Myositis  
Nasal congestion      Nasal disorder      Nasal dryness  
Nasopharyngitis      Nausea      Neck pain      Necrosis      Negativism  
Neoplasm      Neoplasm malignant      Nephritis      Nephrolithiasis  
Nervous system disorder      Nervousness      Neuralgia      Neuritis  
Neurodermatitis      Neuroleptic malignant syndrome      Neuropathy  
peripheral      Neurosis      Neutropenia      Neutrophil count decreased  
Neutrophil count increased      Night blindness      Night sweats  
Nightmare      Nocturia      Nodal arrhythmia      Nodal rhythm  
Normochromic normocytic anaemia      Nuchal rigidity      Nystagmus  
Obesity      Obsessive thoughts      Obstruction      Obstructive  
airways disorder      Ocular hyperaemia      Oculogyric crisis      Oedema  
Oedema peripheral      Oesophageal achalasia      Oesophageal disorder  
Oesophageal ulcer      Oesophagitis      Oliguria      Onychomycosis  
Open angle glaucoma      Opisthotonus      Optic neuritis      Oral  
candidiasis      Oral disorder      Oral pain      Orchitis noninfective  
Orgasm abnormal      Oropharyngeal discomfort      Oropharyngeal  
pain      Oropharyngeal spasm      Orthostatic hypotension  
Osteoarthritis      Osteopenia      Osteoporosis      Otitis externa  
Otitis media      Ovarian cyst      Ovarian disorder      Pain      Pain  
in extremity      Pain in jaw      Pallor      Palpitations  
Pancreatitis      Pancreatitis acute      Pancytopenia      Panic  
attack      Panic disorder      Panic disorder with agoraphobia      Panic  
reaction      Paraesthesia oral      Paralysis      Paranoia      Parity  
Parkinsonian gait      Parosmia      Parotid gland enlargement  
Parotitis      Pathological fracture      Pelvic pain      Peptic ulcer  
Pericardial effusion      Pericardial haemorrhage  
Pericarditis      Periodontitis      Periorbital oedema  
Peripheral vascular disorder      Peritonitis      Personality disorder  
Petechiae      Pharyngeal disorder      Pharyngeal erythema  
Pharyngitis      Phlebitis      Phobia      Phonological disorder  
Photophobia      Photopsia      Photosensitivity reaction      Platelet  
count decreased      Pleural disorder      Pleural effusion      Pneumonia  
Pneumonia aspiration      Poisoning      Pollakiuria      Polycythaemia  
Polydipsia      Polyp      Polyuria      Porphyria      Postpartum disorder  
Pregnancy      Premature baby      Premature delivery      Premature  
ejaculation      Premenstrual syndrome      Pressure of speech      Presyncope  
Priapism      Productive cough      Prostate cancer      Prostatic  
disorder      Prostatitis      Protein urine present      Proteinuria      Protrusion  
tongue      Pruritus      Pruritus genital      Psoriasis      Psychiatric  
symptom      Psychomotor retardation      Psychotic disorder  
Pulmonary congestion      Pulmonary embolism      Pulmonary  
fibrosis      Pulmonary function test decreased      Pulmonary hypertension  
Pulmonary oedema      Punctate keratitis      Pupils unequal  
Purpura      Pyelonephritis      Pyuria      Rales      Rash erythematous  
Rash macular      Rash maculo-papular      Rash papular      Rash  
pustular      Rash scarlatiniform      Rash vesicular      Rectal  
haemorrhage      Red blood cell abnormality      Red blood cell count  
decreased      Red blood cell sedimentation rate increased      Reflux  
oesophagitis      Regressive behaviour      Renal failure acute      Renal  
impairment      Renal pain      Reproductive tract disorder      Respiratory  
alkalosis      Respiratory arrest      Respiratory depression      Respiratory

disorder    Respiratory distress    Respiratory failure    Respiratory  
 tract congestion    Respiratory tract infection    Respiratory tract  
 infection viral    Restless legs syndrome    Retching    Retinal  
 haemorrhage    Rhabdomyolysis    Rheumatoid arthritis    Rhinitis  
                  Rhinitis allergic    Rhinitis seasonal    Rhinorrhoea    Rhonchi  
                  Rosacea    Salivary gland enlargement    Salivary  
 hypersecretion    Salpingitis    Scab    Schizoaffective disorder  
                  Schizophreniform disorder    Sciatica    Scotoma    Seasonal  
 allergy    Seborrhoeic dermatitis    Sedation    Sensation of heaviness  
                  Sensory loss    Sepsis    Septic shock    Sexual  
 dysfunction    Shock    Sialoadenitis    Sicca syndrome    Sinus arrhythmia  
                  Sinus bradycardia    Sinus congestion    Sinus disorder    Sinus  
 headache    Sinus tachycardia    Sinusitis    Skin discolouration    Skin  
 disorder    Skin exfoliation    Skin hypertrophy    Skin irritation    Skin  
 ulcer    Skin warm    Sleep apnoea syndrome    Sleep disorder    Sleep  
 paralysis    Sleep talking    Sluggishness    Sneezing    Social  
 avoidant behaviour    Somnambulism    Somnolence    Speech disorder  
                  Sputum increased    Status epilepticus    Stevens-Johnson  
 syndrome    Stomatitis    Strabismus    Stridor    Stupor  
                  Subarachnoid haemorrhage    Subdural haematoma    Sudden  
 death    Suicidal ideation    Suicide attempt    Supraventricular  
 extrasystoles    Supraventricular tachycardia    Surgery  
                  Suspiciousness    Swelling    Swelling face    Swollen tongue  
 Syncope    Systemic lupus erythematosus    Tachycardia    Tachypnoea  
 Tardive dyskinesia    Tearfulness    Temperature intolerance  
 Tenderness    Tendonitis    Tenosynovitis    Tension headache  
 Teratogenicity    Testicular disorder    Testicular pain  
 Testicular swelling    Tetany    Thinking abnormal    Thirst  
 Thought blocking    Throat tightness    Thrombocytopenia  
 Thrombocytopenic purpura    Thrombocytosis    Thrombophlebitis  
 Thrombosis    Thyroiditis    Tic    Tinnitus    Tongue discolouration  
 Tongue disorder    Tongue dry    Tongue oedema    Tongue paralysis  
 Tongue spasm    Tonsillar hypertrophy    Tooth abscess    Tooth  
 disorder    Tooth impacted    Tooth infection    Tooth malformation  
                  Toothache    Torsade de pointes    Torticollis    Toxic epidermal  
 necrolysis    Tracheal disorder    Transaminases increased    Transient  
 ischaemic attack    Tremor    Trismus    Tuberculin test positive  
                  Tubulointerstitial nephritis    Ulcer    Ulcer haemorrhage    Ulcerative  
 keratitis    Unintended pregnancy    Upper respiratory tract infection  
                  Urethral disorder    Urethritis    Urinary hesitation    Urinary  
 incontinence    Urinary retention    Urinary tract disorder    Urinary  
 tract infection    Urine abnormality    Urine analysis abnormal    Urine  
 output increased    Urosepsis    Urticaria    Uterine disorder    Uterine  
 haemorrhage    Uterine leiomyoma    Uterine neoplasm    Uterine spasm  
                  Uterovaginal prolapse    VIIIth nerve paralysis    Vaginal discharge  
 Vaginal haemorrhage    Vaginal infection    Vaginal inflammation  
 Varicose vein    Vascular headache    Vascular purpura    Vasculitis  
 Vasodilation procedure    Venous thrombosis    Ventricular arrhythmia  
 Ventricular extrasystoles    Ventricular failure    Ventricular  
 fibrillation    Ventricular flutter    Ventricular tachycardia  
 Vertigo    Viral diarrhoea    Viral infection    Vision blurred  
 Visual acuity reduced    Visual impairment    Vomiting  
 Vulvovaginal candidiasis    Vulvovaginal mycotic infection  
 Vulvovaginal pruritus    Vulvovaginitis    Water intoxication  
 Weight decreased    Weight fluctuation    Weight increased

Wheezing White blood cell count decreased White blood cell  
count increased White blood cell disorder White blood cells  
urine positive Withdrawal syndrome Xerophthalmia Xerosis  
Yawning

\*\*\*\*\*  
\*\*\*\*\*

5-hydroxytryptamine 6 receptor - Group: Receptor

Treated with:

ziprasidone: approved small molecule (251 associated side effects) For the treatment of schizophrenia and related psychotic disorders.

olanzapine: approved small molecule (393 associated side effects) For the acute and maintenance treatment of schizophrenia and related psychotic disorders, as well as acute treatment of manic or mixed episodes of bipolar 1 disorder. Intramuscular olanzapine is indicated for the rapid control of agitated patients.

clozapine: approved small molecule (228 associated side effects) For use in patients with treatment-resistant schizophrenia.

quetiapine: approved small molecule (359 associated side effects) For the treatment of schizophrenia and related psychotic disorders.

aripiprazole: approved small molecule (630 associated side effects) For the treatment of schizophrenia and related psychotic disorders.

dimethyltryptamine: illicit,experimental small molecule (0 associated side effects) Some people use this compound as a psychedelic inducing agent.

sertindole: approved,withdrawn small molecule (0 associated side effects) Used in the treatment of schizophrenia.

806 known side effects mediated through drugs targeting this protein:

Abasia Abdominal discomfort Abdominal distension Abdominal pain  
Abdominal pain lower Abdominal pain upper Abdominal tenderness  
Abnormal dreams Abnormal faeces Abscess Accommodation disorder  
Acidosis Acne Acute coronary syndrome Acute psychosis Affect lability  
Aggression Agitation Agoraphobia Agranulocytosis Akathisia Akinesia  
Alanine aminotransferase increased Albuminuria Alcohol intolerance  
Alkalosis Alopecia Altered state of consciousness Amblyopia  
Amenorrhoea Amnesia Anaemia Anaemia macrocytic Anaphylactic shock  
Anaphylactoid reaction Anger Angina pectoris Angioedema  
Angiopathy Angle closure glaucoma Anorgasmia Antisocial behaviour  
Antisocial personality disorder Anxiety Aortic dissection Apathy  
Aphasia Aphthous stomatitis Apnoea Appendicitis Arrhythmia  
Arteritis Arthralgia Arthritis Arthropathy Asocial behaviour  
Aspartate aminotransferase increased Asphyxia Aspiration Asthenia  
Asthma Ataxia Atelectasis Atrial fibrillation Atrial flutter  
Atrioventricular block first degree Azotaemia Back pain  
Balance disorder Basophilia Benign prostatic hyperplasia  
Bladder pain Blepharitis Blepharospasm Blindness Blister  
Blood alkaline phosphatase increased Blood bilirubin increased  
Blood cholesterol

increased Blood creatine phosphokinase increased Blood creatinine  
 increased Blood glucose decreased Blood glucose increased  
 Blood insulin increased Blood lactate dehydrogenase  
 increased Blood potassium decreased Blood potassium increased  
 Blood pressure abnormal Blood pressure diastolic decreased  
 Blood pressure fluctuation Blood pressure increased Blood  
 pressure systolic decreased Blood prolactin increased Blood  
 triglycerides increased Blood triglycerides normal Blood urea  
 increased Blood uric acid increased Blood urine Blood urine  
 present Blunted affect Body temperature decreased Body  
 temperature increased Bone pain Bradycardia Bradykinesia  
 Bradyphrenia Breast disorder Breast enlargement  
 Breast feeding Breast pain Bronchitis Bronchopneumopathy  
 Bruxism Buccoglossal syndrome Bundle branch block  
 Burning sensation Bursitis Calculus urinary Candidiasis  
 Carbohydrate tolerance decreased Cardiac arrest Cardiac  
 disorder Cardiac failure Cardiac failure congestive Cardiac  
 fibrillation Cardiac flutter Cardiac murmur Cardio-  
 respiratory arrest Cardiomegaly Cardiomyopathy  
 Cardiopulmonary failure Cardiovascular disorder  
 Carpal tunnel syndrome Cataplexy Cataract Catatonia Cells  
 in urine Cellulitis Cerebral haemorrhage Cerebral infarction  
 Cerebral ischaemia Cerebrovascular accident Cervicitis  
 Chapped lips Cheilitis Chest discomfort Chest pain  
 Chills Cholecystitis Cholelithiasis Cholestasis  
 Choreoathetosis Chronic obstructive pulmonary disease  
 Coccydynia Cognitive disorder Cogwheel rigidity Cold sweat  
 Colitis Coma Completed suicide Condition aggravated  
 Confusional state Conjunctivitis Connective tissue disorder  
 Constipation Convulsion Coordination abnormal Corneal  
 lesion Costochondritis Cough Cyanosis Cystitis Cystitis  
 noninfective Deafness Death Decreased appetite Decubitus  
 ulcer Deep vein thrombosis Deficiency anaemia Dehydration  
 Delirium Delusion Dementia Dental caries Dependence  
 Depersonalisation Depressed level of consciousness Depression  
 Depressive symptom Derealisation Dermal cyst Dermatitis  
 atopic Dermatitis bullous Dermatitis contact Dermatitis  
 exfoliative Diabetes mellitus Diabetic coma Diabetic  
 hyperglycaemic coma Diabetic hyperosmolar coma Diabetic  
 ketoacidosis Diarrhoea Diplopia Discomfort Disorientation  
 Disturbance in attention Disturbance in sexual arousal  
 Dizziness Dizziness exertional Dizziness postural  
 Drooling Drug abuse Drug dependence Drug eruption Drug  
 interaction Dry eye Dry mouth Dry skin Dry throat Duodenal  
 ulcer Dysarthria Dysgeusia Dyskinesia Dysmenorrhoea Dyspepsia  
 Dysphagia Dysphemia Dysphonia Dysphoria Dyspnoea  
 Dystonia Dysuria Ear disorder Ear infection Ear  
 pain Ecchymosis Eczema Effusion Ejaculation disorder  
 Elastosis perforans Electrocardiogram QT prolonged  
 Electrocardiogram ST segment elevation Electrocardiogram T  
 wave inversion Electrocardiogram abnormal Electrocardiogram  
 change Electroencephalogram abnormal Embolism  
 Encephalopathy Endocrine disorder Energy increased  
 Enteritis Enuresis Eosinophilia Epididymitis  
 Epilepsy Epistaxis Erectile dysfunction Eructation

Erythema Erythema multiforme Euphoric mood Exfoliative  
 rash Exostosis Extrapyrarnidal disorder Extrasystoles Eye  
 discharge Eye disorder Eye haemorrhage Eye infection Eye  
 inflammation Eye irritation Eye pain Eyelid disorder  
 Eyelid function disorder Eyelid oedema Eyelid ptosis  
 Face oedema Facial pain Facial paresis Faecal incontinence  
 Faecalith Faecaloma Faeces hard Fasting Fatigue Fear  
 Feeling abnormal Feeling cold Feeling hot Feeling jittery  
 Female sexual dysfunction Flank pain Flat affect Flatulence  
 Flushing Folliculitis Formication Fungal infection  
 Fungal skin infection Furuncle Gait disturbance  
 Galactorrhoea Gamma-glutamyltransferase increased  
 Gastric disorder Gastric pH decreased Gastric ulcer  
 Gastric ulcer haemorrhage Gastritis Gastroenteritis  
 Gastrointestinal disorder Gastrointestinal haemorrhage  
 Gastrointestinal pain Gastrooesophageal reflux disease  
 Genital discharge Gingival bleeding Gingival pain Gingivitis  
 Glaucoma Glossitis Glossodynia Glucose tolerance decreased  
 Glucose tolerance impaired Glycosuria Glycosylated  
 haemoglobin increased Goitre Gout Grand mal convulsion Groin  
 pain Gynaecomastia Haematemesis Haematochezia Haematocrit  
 decreased Haematoma Haematuria Haemoglobin Haemoglobin decreased  
 Haemoglobin increased Haemolysis Haemoptysis Haemorrhage  
 Haemorrhage intracranial Haemorrhoids Hallucination  
 Hallucination, auditory Hallucination, visual Hangover  
 Head discomfort Headache Heart disease congenital Heart  
 rate irregular Hemiparesis Hemiplegia Hepatic enzyme increased  
 Hepatic failure Hepatic steatosis Hepatitis Hepatobiliary  
 disease Hepatomegaly Hernia Hiccups Hirsutism  
 Homicidal ideation Hormone level abnormal Hostility Hot  
 flush Hyperacusis Hyperaesthesia Hyperbilirubinaemia  
 Hyperchloraemia Hyperchlorhydria Hypercholesterolaemia  
 Hyperglycaemia Hyperhidrosis Hyperinsulinism  
 Hyperkalaemia Hyperkeratosis Hyperkinesia  
 Hyperlipidaemia Hypernatraemia Hyperparathyroidism  
 Hyperplasia Hyperreflexia Hypersensitivity Hypersomnia  
 Hypertension Hyperthermia Hyperthyroidism Hypertonia  
 Hypertriglyceridaemia Hypertrophy Hyperuricaemia  
 Hyperventilation Hypoaesthesia Hypoaesthesia oral  
 Hypocalcaemia Hypochloraemia Hypocholesterolaemia  
 Hypochromic anaemia Hypoglycaemia Hypokalaemia  
 Hypokinesia Hypomagnesaemia Hypomania Hypomenorrhoea  
 Hyponatraemia Hypophagia Hypoproteinaemia Hyporeflexia  
 Hypotension Hypothermia Hypothyroidism Hypotonia  
 Hypoventilation Hypoxia Idiopathic thrombocytopenic  
 purpura Ileus Ileus paralytic Ill-defined disorder Immune  
 system disorder Inappropriate antidiuretic hormone secretion  
 Incontinence Increased appetite Induration Infarction  
 Infection Infestation Inflammation Influenza Inguinal  
 hernia Injection site mass Injection site pain Injection  
 site reaction Insomnia Intention tremor Intentional self-  
 injury Interstitial lung disease Intestinal functional  
 disorder Intestinal obstruction Intestinal perforation Iron  
 deficiency Iron deficiency anaemia Irritability Irritable  
 bowel syndrome Ischaemia Ischaemic stroke Jaundice Jaundice

cholestatic Joint contracture Joint range of motion decreased Joint  
stiffness Joint swelling Judgement impaired Keratitis  
Ketoacidosis Ketosis Lacrimation increased Laryngitis  
Laryngospasm Leiomyoma Lens disorder Lenticular  
opacities Lenticular pigmentation Lethargy Leukocytosis  
Leukoderma Leukopenia Leukoplakia oral Libido decreased  
Libido increased Lip dry Liver disorder Logorrhoea Loss  
of consciousness Loss of libido Lower respiratory tract infection  
Lymphadenopathy Lymphocytosis Lymphoedema Malaise Male  
sexual dysfunction Mania Masked facies Mastitis Mediastinal  
disorder Melaena Memory impairment Menopausal symptoms  
Menorrhagia Menstrual disorder Menstruation irregular  
Mental disability Mental disorder Mental retardation  
Mental status changes Metrorrhagia Micturition urgency  
Migraine Miosis Mitral valve incompetence Mobility  
decreased Monocytosis Mood swings Mouth ulceration Movement disorder  
Muscle contractions involuntary Muscle contracture  
Muscle enzyme increased Muscle relaxant therapy  
Muscle rigidity Muscle spasms Muscle tightness Muscle  
twitching Muscular weakness Musculoskeletal chest pain  
Musculoskeletal discomfort Musculoskeletal pain  
Musculoskeletal stiffness Myalgia Myasthenic syndrome  
Mydriasis Myocardial infarction Myocardial ischaemia  
Myocarditis Myoclonus Myopathy Nasal congestion Nasal  
disorder Nasal dryness Nasopharyngitis Nausea Neck pain  
Nephritis Nephrolithiasis Nervous system disorder  
Nervousness Neuralgia Neurodermatitis Neuroleptic malignant  
syndrome Neuropathy peripheral Neurosis Neutropenia Neutrophil  
count decreased Neutrophil count increased Night sweats  
Nightmare Nocturia Normochromic normocytic anaemia  
Nuchal rigidity Nystagmus Obesity Obsessive thoughts  
Obstruction Ocular hyperaemia Oculogyric crisis Oedema  
Oedema peripheral Oesophageal disorder Oesophageal ulcer  
Oesophagitis Oliguria Onychomycosis Opisthotonus  
Oral candidiasis Oral pain Orchitis noninfective  
Oropharyngeal discomfort Oropharyngeal pain  
Oropharyngeal spasm Orthostatic hypotension  
Osteoarthritis Osteopenia Osteoporosis Otitis externa  
Otitis media Ovarian cyst Pain Pain in extremity Pain  
in jaw Pallor Palpitations Pancreatitis  
Pancreatitis acute Panic attack Panic disorder Panic  
disorder with agoraphobia Panic reaction Paraesthesia oral  
Paralysis Paranoia Parkinsonian gait Pathological fracture  
Pelvic pain Peptic ulcer Pericardial effusion  
Pericarditis Periodontitis Periorbital oedema  
Personality disorder Petechiae Pharyngeal erythema  
Pharyngitis Phlebitis Phobia Phonological disorder  
Photophobia Photopsia Photosensitivity reaction Platelet  
count decreased Pleural disorder Pleural effusion Pneumonia  
Pneumonia aspiration Poisoning Pollakiuria Polycythaemia  
Polydipsia Polyuria Premature ejaculation Premenstrual  
syndrome Presyncope Priapism Productive cough Prostatitis  
Protein urine present Proteinuria Protrusion tongue Pruritus  
Pruritus genital Psoriasis Psychiatric symptom Psychomotor  
retardation Psychotic disorder Pulmonary congestion Pulmonary



embolism Pulmonary oedema Purpura Pyelonephritis Pyuria  
 Rash erythematous Rash maculo-papular Rash papular Rash  
 pustular Rash vesicular Rectal haemorrhage Red blood cell  
 count decreased Red blood cell sedimentation rate increased  
 Reflux oesophagitis Regressive behaviour Renal failure  
 acute Respiratory alkalosis Respiratory arrest Respiratory  
 disorder Respiratory distress Respiratory failure Respiratory  
 tract congestion Respiratory tract infection Respiratory tract  
 infection viral Restless legs syndrome Retching Rhabdomyolysis  
 Rheumatoid arthritis Rhinitis Rhinitis allergic Rhinitis  
 seasonal Rhinorrhoea Rhonchi Rosacea Salivary gland  
 enlargement Salivary hypersecretion Scab Schizoaffective  
 disorder Schizophreniform disorder Sciatica Scotoma  
 Seasonal allergy Seborrhoeic dermatitis Sedation Sensation  
 of heaviness Sensory loss Sepsis Septic shock  
 Sexual dysfunction Shock Sinus congestion Sinus disorder  
 Sinus headache Sinus tachycardia Sinusitis Skin  
 discolouration Skin irritation Skin ulcer Sleep apnoea syndrome  
 Sleep disorder Sleep talking Sluggishness Sneezing  
 Social avoidant behaviour Somnambulism Somnolence  
 Speech disorder Status epilepticus Stevens-Johnson  
 syndrome Stomatitis Stridor Stupor Subarachnoid  
 haemorrhage Subdural haematoma Sudden death Suicidal ideation  
 Suicide attempt Supraventricular tachycardia Suspiciousness  
 Swelling Swelling face Swollen tongue Syncope  
 Tachycardia Tardive dyskinesia Tenderness Tendonitis  
 Tenosynovitis Tension headache Testicular pain Thinking  
 abnormal Thirst Thought blocking Throat tightness  
 Thrombocytopenia Thrombocytopenic purpura Thrombocytosis  
 Thrombophlebitis Thrombosis Thyroiditis Tic Tinnitus  
 Tongue discolouration Tongue disorder Tongue dry Tongue  
 oedema Tongue paralysis Tongue spasm Tonsillar hypertrophy  
 Tooth abscess Tooth disorder Tooth impacted Tooth  
 infection Toothache Torsade de pointes Torticollis Toxic  
 epidermal necrolysis Transaminases increased Transient  
 ischaemic attack Tremor Trismus Tuberculin test positive  
 Tubulointerstitial nephritis Ulcer Ulcer haemorrhage Unintended  
 pregnancy Upper respiratory tract infection Urethral disorder  
 Urinary hesitation Urinary incontinence Urinary retention  
 Urinary tract disorder Urinary tract infection Urine  
 output increased Urosepsis Urticaria Uterine disorder Uterine  
 haemorrhage Uterine leiomyoma Uterovaginal prolapse VIIIth nerve  
 paralysis Vaginal discharge Vaginal haemorrhage Vaginal infection  
 Vaginal inflammation Varicose vein Vascular purpura  
 Vasculitis Vasodilation procedure Venous thrombosis Ventricular  
 extrasystoles Ventricular fibrillation Ventricular  
 tachycardia Vertigo Viral diarrhoea Viral infection Vision  
 blurred Visual acuity reduced Visual impairment Vomiting  
 Vulvovaginal candidiasis Vulvovaginal mycotic infection  
 Vulvovaginal pruritus Vulvovaginitis Water intoxication  
 Weight decreased Weight fluctuation Weight increased  
 Wheezing White blood cell count decreased White blood cell  
 count increased White blood cells urine positive Withdrawal  
 syndrome Xerosis

\*\*\*\*\*  
\*\*\*\*\*

Outer membrane protein G - Group: Channel

Treated with:

lauryl dimethylamine-n-oxide: experimental small molecule  
(0 associated side effects)  
(hydroxyethyloxy)tri(ethyloxy)octane: experimental small  
molecule (0 associated side effects)

known side effects mediated through drugs targeting this protein:

\*\*\*\*\*  
\*\*\*\*\*

Alpha-2A adrenergic receptor - Group: Receptor

Treated with:

bethanidine: approved small molecule (0 associated side effects) For the treatment of hypertension.  
ziprasidone: approved small molecule (251 associated side effects) For the treatment of schizophrenia and related psychotic disorders.  
cabergoline: approved small molecule (96 associated side effects) For the treatment of hyperprolactinemic disorders, either idiopathic or due to prolactinoma (prolactin-secreting adenomas). May also be used to manage symptoms of Parkinsonian Syndrome as monotherapy during initial symptomatic management or as an adjunct to levodopa therapy during advanced stages of disease.  
ropinirole: approved small molecule (631 associated side effects) For the treatment of the signs and symptoms of idiopathic Parkinson's disease. Also used for the treatment of restless legs syndrome.  
dihydroergotamine: approved small molecule (128 associated side effects) For the acute treatment of migraine headaches with or without aura and the acute treatment of cluster headache episodes.  
amitriptyline: approved small molecule (109 associated side effects) For the treatment of depression, chronic pain, irritable bowel syndrome, sleep disorders, diabetic neuropathy, agitation and insomnia, and migraine prophylaxis.  
olanzapine: approved small molecule (393 associated side effects) For the acute and maintenance treatment of schizophrenia and related psychotic disorders, as well as acute treatment of manic or mixed episodes of bipolar 1 disorder. Intramuscular olanzapine is indicated for the rapid control of agitated patients.  
clozapine: approved small molecule (228 associated side effects) For use in patients with treatment-resistant schizophrenia.  
norepinephrine: approved small molecule (22 associated side effects) Mainly used to treat patients in vasodilatory shock states such as septic shock and neurogenic shock and has shown a survival benefit over dopamine. Also used as a vasopressor medication for patients with critical hypotension.  
mirtazapine: approved small molecule (272 associated side effects) For the treatment of major depressive disorder.

phenylpropanolamine: approved, withdrawn small molecule (0 associated side effects) For the treatment of nasal congestion, control of urinary incontinence, priapism and obesity.

pramipexole: approved small molecule (620 associated side effects) For the treatment of signs and symptoms of idiopathic Parkinson's disease

dipivefrin: approved small molecule (12 associated side effects)

Dipivefrin is a prodrug which is used as initial therapy for the control of intraocular pressure in chronic open-angle glaucoma. brimonidine: approved small molecule (109 associated side effects) For the lowering of intraocular pressure in patients with open-angle glaucoma or ocular hypertension.

amoxapine: approved small molecule (103 associated side effects) For the relief of symptoms of depression in patients with neurotic or reactive depressive disorders as well as endogenous and psychotic depressions. May also be used to treat depression accompanied by anxiety or agitation.

clonidine: approved small molecule (161 associated side effects) May be used as an adjunct in the treatment of hypertension, as an epidural infusion as an adjunct treatment in the management of severe cancer pain that is not relieved by opiate analgesics alone, for differential diagnosis of pheochromocytoma in hypertensive patients, prophylaxis of vascular migraine headaches, treatment of severe dysmenorrhea, management of vasomotor symptoms associated with menopause, rapid detoxification in the management of opiate withdrawal, treatment of alcohol withdrawal used in conjunction with benzodiazepines, management of nicotine dependence, topical use to reduce intraocular pressure in the treatment of open-angle and secondary glaucoma and hemorrhagic glaucoma associated with hypertension, and in the treatment of attention-deficit hyperactivity disorder (ADHD).

lisuride: approved small molecule (0 associated side effects) For the management of Parkinson's Disease

guanabenz: approved small molecule (0 associated side effects) For management of High blood pressure

dexmedetomidine: approved small molecule (85 associated side effects) For sedation of initially intubated and mechanically ventilated patients during treatment in an intensive care setting, also used in pain relief; anxiety reduction and analgesia

trazodone: approved small molecule (194 associated side effects) For the treatment of depression.

phentolamine: approved small molecule (28 associated side effects) Used as an aid for the diagnosis of pheochromocytoma, and may be administered immediately prior to or during pheochromocytectomy to prevent or control paroxysmal hypertension resulting from anesthesia, stress, or operative manipulation of the tumor. Phentolamine has also been used to treat hypertensive crisis caused by sympathomimetic amines or catecholamine excess by certain foods or drugs in patients taking MAO inhibitors, or by clonidine withdrawal syndrome. Other indications include the prevention of dermal necrosis and sloughing following IV administration or extravasation of norepinephrine, decrease in impedance to left ventricular ejection and the infarct size in patients with MI associated with left ventricular failure, treatment of erectile dysfunction through self-injection of small doses combined with

papaverine hydrochloride into the corpus cavernosum, and as an adjunct to the management of cocaine overdose to reverse coronary vasoconstriction following use of oxygen, benzodiazepines, and nitroglycerin.

tizanidine: approved small molecule (230 associated side effects) For the management of increased muscle tone associated with spasticity

apomorphine: approved small molecule (45 associated side effects) For the acute, intermittent treatment of hypomobility, off episodes (end-of-dose wearing off and unpredictable on/off episodes) associated with advanced Parkinson's disease.

risperidone: approved small molecule (532 associated side effects) For the treatment of schizophrenia in adults and in adolescents, ages 13 to 17, and for the short-term treatment of manic or mixed episodes of bipolar I disorder in children and adolescents ages 10 to 17. May also be used to manage symptoms of inappropriate behavior due to aggression and/or psychosis in patients with severe dementia.

epinastine: approved small molecule (12 associated side effects) For the prevention of itching associated with allergic conjunctivitis.

tolazoline: approved small molecule (0 associated side effects) For the treatment of pulmonary artery anomalies

fenoldopam: approved small molecule (51 associated side effects)

For the in-hospital, short-term (up to 48 hours) management of severe hypertension when rapid, but quickly reversible, emergency reduction of blood pressure is clinically indicated, including malignant hypertension with deteriorating end-organ function.

pseudoephedrine: approved small molecule (0 associated side effects) For the treatment of nasal congestion, sinus congestion, Eustachian tube congestion, and vasomotor rhinitis, and as an adjunct to other agents in the optimum treatment of allergic rhinitis, croup, sinusitis, otitis media, and tracheobronchitis. Also used as first-line therapy of priapism.

benzphetamine: illicit, approved small molecule (0 associated side effects) For the management of exogenous obesity as a short term adjunct (a few weeks) in a regimen of weight reduction based on caloric restriction

phenoxybenzamine: approved small molecule (9 associated side effects) For the treatment of pheochromocytoma (malignant), benign prostatic hypertrophy and malignant essential hypertension.

oxymetazoline: approved small molecule (0 associated side effects) For treatment of nasal congestion and redness associated with minor irritations of the eye

apraclonidine: approved small molecule (85 associated side effects) For prevention or reduction of intraoperative and postoperative increases in intraocular pressure (IOP) before and after ocular laser surgery when used prophylactically. Also used as a short-term adjunctive therapy in patients with open-angle glaucoma who are on maximally tolerated medical therapy requiring additional IOP reduction.

methyldopa: approved small molecule (67 associated side effects) For use in the treatment of hypertension.

guanfacine: approved small molecule (106 associated side effects) For use alone or in combination with other classes of

antihypertensive agents in the management of hypertension. Has also been used for the treatment of attention deficit hyperactivity disorder (ADHD) in pediatric patients.

ergoloid mesylate: approved small molecule (0 associated side effects) For use as an adjunct therapy for patients with dementia

doxepin: approved small molecule (210 associated side effects) Labeled indications: depression and insomnia. Unlabeled indications: chronic and neuropathic pain, anxiety, idiopathic urticaria.

nefazodone: approved,withdrawn small molecule (246 associated side effects) For the treatment of depression.

pergolide: approved,withdrawn small molecule (354 associated side effects) Indicated as adjunctive treatment to levodopa/carbidopa in the management of the signs and symptoms of Parkinson's disease. It was withdrawn from the US and Canadian markets in 2007 due to an increased risk of cardiac valvulopathy.

bromocriptine: approved small molecule (120 associated side effects) For the treatment of galactorrhea due to hyperprolactinemia, prolactin-dependent menstrual disorders and infertility, prolactin-secreting adenomas, prolactin-dependent male hypogonadism, as adjunct therapy to surgery or radiotherapy for acromegaly or as monotherapy in special cases, as monotherapy in early Parkinsonian Syndrome or as an adjunct with levodopa in advanced cases with motor complications. Bromocriptine has also been used off-label to treat restless legs syndrome and neuroleptic malignant syndrome.

quetiapine: approved small molecule (359 associated side effects) For the treatment of schizophrenia and related psychotic disorders.

aripiprazole: approved small molecule (630 associated side effects) For the treatment of schizophrenia and related psychotic disorders.

paliperidone: approved small molecule (216 associated side effects) For the treatment of schizophrenia.

dihydroergotoxine: approved small molecule (0 associated side effects) For potential use in the treatment of Alzheimer's disease.

ephedra: approved,withdrawn,nutraceutical small molecule (0 associated side effects) Ephedra is widely used by athletes, despite a lack of evidence that it enhances athletic performance. Ephedra has also been used for weight loss.

yohimbine: approved small molecule (0 associated side effects) Indicated as a sympatholytic and mydriatic. Impotence has been successfully treated with yohimbine in male patients with vascular or diabetic origins and psychogenic origins.

methotrimeprazine: approved small molecule (0 associated side effects) For the treatment of psychosis, particular those of schizophrenia, and manic phases of bipolar disorder.

4-methoxyamphetamine: illicit,experimental small molecule (0 associated side effects)

methamphetamine: illicit,approved small molecule (30 associated side effects) For the treatment of Attention Deficit Disorder with Hyperactivity (ADHD) and exogenous obesity.

propericiazine: approved small molecule (0 associated side effects) For use as adjunctive medication in some psychotic patients. Propericiazine (Pericyazine) is used for the control of residual prevailing hostility, impulsiveness and aggressiveness.

zuclophenthixol: approved small molecule (0 associated side effects) For the management of the manifestations of schizophrenia.

lofexidine: approved small molecule (0 associated side effects) Investigated for use/treatment in addictions and substance abuse.

mianserin: approved small molecule (0 associated side effects) For the treatment of depression.

droxidopa: approved small molecule (0 associated side effects) For treatment of neurogenic orthostatic hypotension (NOH) associated with various disorders including Multiple System Atrophy, Familial Amyloid Polyneuropathy, hemodialysis induced hypotension and Parkinson's Disease. Also investigated for use/treatment in neurologic disorders, nephropathy, blood (blood forming organ disorders, unspecified), and dizzy/fainting spells.

xylometazoline: approved small molecule (0 associated side effects) It is used for treating nasal congestion and minor inflammation due to allergies or colds.

naphazoline: approved small molecule (18 associated side effects) Naphazoline is primarily indicated in conditions like Corneal vascularity, Hyperaemia, Itching, Nasal congestion, and can also be given in adjunctive therapy as an alternative drug of choice in Sinusitis

1344 known side effects mediated through drugs targeting this protein:

Abasia Abdominal adhesions Abdominal discomfort Abdominal distension Abdominal neoplasm Abdominal pain Abdominal pain lower Abdominal pain upper Abdominal tenderness Abnormal behaviour Abnormal dreams Abnormal faeces Abscess Accommodation disorder Acidosis Acne Actinic keratosis Acute abdomen Acute coronary syndrome Acute lymphocytic leukaemia Acute psychosis Acute respiratory distress syndrome Acute tonsillitis Adenocarcinoma Adenoma benign Adhesion Adjustment disorder Adrenal insufficiency Affect lability Affective disorder Ageusia Aggression Agitation Agoraphobia Agranulocytosis Akathisia Akinesia Alanine aminotransferase increased Albright's disease Albuminuria Alcohol intolerance Alkalosis Alopecia Altered state of consciousness Amaurosis fugax Amblyopia Amenorrhoea Amnesia Amyotrophic lateral sclerosis Anaemia Anaemia macrocytic Anaemia megaloblastic Anaphylactic shock Anaphylactoid reaction Aneurysm Anger Angina pectoris Angina unstable Angioedema Angiomyolipoma Angiopathy Angle closure glaucoma Anorectal discomfort Anorectal disorder Anorgasmia Antidiuretic hormone abnormality Antinuclear antibody positive Antisocial behaviour Antisocial personality disorder Anxiety Aortic dissection Apathy Aphasia Aphonia Aphthous stomatitis Aplastic anaemia Apnoea Appendicitis Application site reaction Apraxia Arrhythmia Arrhythmia supraventricular Arterial disorder

Arterial occlusive disease Arterial stenosisArteriosclerosis  
 Arteriospasm coronary Arteritis Arthralgia Arthritis  
 ArthropathyAscites Asocial behaviourAspartate  
 aminotransferase increased Asphyxia Aspiration Asthenia  
 Asthma Ataxia AtelectasisAtrial fibrillation  
 Atrial flutter Atrial septal defect Atrioventricular block  
 first degree Atrioventricular block second degree Atrophy  
 Aura Automatism Autonomic nervous system imbalanceAzotaemia  
 Back pain Bacterial infection Balance disorder  
 Balanoposthitis Basal cell carcinoma Basophilia Benign  
 intracranial hypertension Benign neoplasm Benign neoplasm of  
 skin Benign prostatic hyperplasiaBiliary colic Binge eating  
 Bladder cancer Bladder disorder Bladder pain Blepharitis  
 Blepharospasm Blindness Blindness transient Blister  
 Blood acid phosphatase increased Blood alkaline phosphatase  
 increased Blood amylase increased Blood antidiuretic hormone  
 abnormal Blood bilirubin increased Blood cholesterol increased  
 Blood creatine phosphokinase increased Blood creatinine  
 increased Blood electrolytes abnormal Blood glucose decreased  
 Blood glucose increased Blood insulin increased Blood  
 iron decreased Blood lactate dehydrogenase increased Blood  
 phosphorus increased Blood potassium decreased Blood potassium  
 increased Blood pressure abnormal Blood pressure diastolic  
 decreased Blood pressure fluctuation Blood pressure increased  
 Blood pressure systolic decreased Blood prolactin increased  
 Blood testosterone decreasedBlood triglycerides increased  
 Blood triglycerides normal Blood urea increased Blood uric  
 acid increased Blood urineBlood urine present Blunted affect  
 Body temperature decreased Body temperature increased Bone  
 disorder Bone pain Bone sarcoma BradycardiaBradykinesia  
 Bradyphrenia Brain neoplasm Brain neoplasm benign Brain  
 oedema Breast cancer Breast cystBreast discharge Breast  
 discomfort Breast disorder Breast disorder female Breast disorder  
 male Breast engorgement Breast enlargement Breast feeding  
 Breast neoplasm Breast painBreast swelling Breast tenderness  
 Breath odour Bronchiolitis Bronchitis Bronchopneumonia  
 Bronchopneumopathy Bronchospasm Bruxism  
 Buccoglossal syndrome Bulimia nervosa Bundle branch block  
 Bundle branch block left Bundle branch block right  
 Burning sensationBursitis Cachexia Calculus bladder  
 Calculus urinary Cancer in remission Candidiasis  
 Carbohydrate tolerance decreased Carbon dioxide increased  
 Cardiac arrest Cardiac disorder Cardiac failure Cardiac  
 failure congestive Cardiac fibrillation Cardiac flutter  
 Cardiac murmur Cardiac septal defect Cardiac valve disease  
 Cardio-respiratory arrest Cardiomegaly Cardiomyopathy  
 Cardiopulmonary failure Cardiovascular disorder  
 Carotid artery occlusion Carpal tunnel syndrome Cataplexy  
 Cataract Catatonia Cells in urine Cellulitis Cerebral  
 artery embolism Cerebral atrophy Cerebral haemorrhage Cerebral  
 infarction Cerebral ischaemia Cerebrospinal fluid rhinorrhoea  
 Cerebrovascular accident Cerebrovascular disorder  
 Cerebrovascular insufficiency Cervicitis Cervix carcinoma  
 Chapped lips Cheilitis Chest discomfort Chest pain  
 Chills Choking Cholecystitis Cholecystitis chronic

Cholelithiasis Cholestasis Chorea Choreoathetosis  
 Chromaturia Chronic lymphocytic leukaemia Chronic  
 obstructive pulmonary disease Clonus Coagulopathy  
 Coccydynia Cognitive disorder Cogwheel rigidity Cold sweat  
 Colitis Colitis ulcerative Colon cancer Colonic  
 pseudo-obstruction Colorectal cancer Coma Completed suicide  
 Compulsions Condition aggravated Confusional state Congenital  
 anomaly Congenital eye disorder Congenital foot malformation  
 Congenital genitourinary abnormality Conjunctival disorder  
 Conjunctival follicles Conjunctival haemorrhage  
 Conjunctival hyperaemia Conjunctival oedema  
 Conjunctivitis Conjunctivitis allergic Connective tissue  
 disorder Constipation Convulsion Coombs test positive  
 Coordination abnormal Corneal erosion Corneal infiltrates  
 Corneal lesion Corneal staining Coronary artery disease  
 Coronary artery occlusion Costochondritis Cough Crocodile  
 tears syndrome Crying Cyanosis Cystitis Cystitis  
 noninfective Cytolytic hepatitis Dandruff Deafness  
 Deafness transitory Death Decreased appetite Decubitus  
 ulcer Deep vein thrombosis Deficiency anaemia Dehydration  
 Delirium Delusion Dementia Dementia with Lewy bodies  
 Dental caries Dependence Depersonalisation Depressed level  
 of consciousness Depressed mood Depression Depressive symptom  
 Derealisation Dermal cyst Dermatitis atopic Dermatitis  
 bullous Dermatitis contact Dermatitis exfoliative Dermatitis  
 infected Dermoid cyst Developmental delay Device related  
 infection Diabetes mellitus Diabetic coma Diabetic  
 hyperglycaemic coma Diabetic hyperosmolar coma Diabetic  
 ketoacidosis Diaphragmatic hernia Diarrhoea Diastolic  
 hypertension Diplopia Discomfort Disorientation  
 Disseminated intravascular coagulation Dissociation  
 Disturbance in attention Disturbance in sexual arousal  
 Diverticulitis Dizziness Dizziness exertional Dizziness  
 postural Drooling Drug abuse Drug dependence Drug eruption  
 Drug hypersensitivity Drug ineffective Drug interaction Drug  
 level increased Drug withdrawal syndrome Drug withdrawal  
 syndrome neonatal Dry eye Dry mouth Dry skin Dry throat  
 Duodenal ulcer Duodenal ulcer haemorrhage Duodenitis  
 Dysarthria Dysentery Dysgeusia Dysgraphia Dyskinesia  
 Dysmenorrhoea Dyspepsia Dysphagia Dysphemia Dysphonia  
 Dysphoria Dyspnoea Dyspnoea exertional Dystonia  
 Dysuria Ear disorder Ear infection Ear pain  
 Ecchymosis Eclampsia Eczema Effusion Ejaculation  
 delayed Ejaculation disorder Ejaculation failure Elastosis  
 perforans Elderly Electrocardiogram QRS complex  
 Electrocardiogram QT prolonged Electrocardiogram ST segment  
 depression Electrocardiogram ST segment elevation Electrocardiogram  
 T wave inversion Electrocardiogram abnormal Electrocardiogram  
 change Electroencephalogram abnormal Electrolyte imbalance  
 Elevated mood Embolism Emotional disorder Emotional  
 distress Emphysema Encephalopathy Endocrine disorder  
 Endometrial cancer Endometrial neoplasm Energy increased  
 Enteritis Enuresis Enzyme abnormality Eosinophil count  
 increased Eosinophilia Epicondylitis Epididymitis  
 Epilepsy Epistaxis Erectile dysfunction Eructation



Erythema Erythema multiforme Erythema of eyelid  
 Erythromelalgia Euphoric mood Exfoliative rash Exostosis  
 Extradural abscess Extrapyrarnidal disorder  
 Extrasystoles Extravasation Eye discharge Eye  
 disorder Eye haemorrhage Eye infection Eye inflammation Eye  
 irritation Eye movement disorder Eye pain Eye pruritus Eye  
 swelling Eyelid disorder Eyelid function disorder Eyelid  
 oedema Eyelid ptosis Eyelid retractionEyelids pruritus Face  
 oedema Facial painFacial paresis Faecal incontinence  
 Faecalith Faecaloma Faeces discoloured Faeces hard  
 Fasciitis Fasting Fatigue Fear Feeling abnormal  
 Feeling cold Feeling hotFeeling jittery Female sexual  
 dysfunctionFibroadenoma of breast Fibrocystic breast disease  
 Fibrosis Flank pain Flat affectFlatulence Fluid overload  
 Fluid retention Flushing Foetor hepaticus Folliculitis  
 FormicationFungal infection Fungal skin infection Furuncle  
 Gait disturbance Galactorrhoea Gallbladder cancer  
 Gallbladder disorder Gamma-glutamyltransferase increased  
 Gangrene Gastric cancer Gastric disorder Gastric  
 haemorrhageGastric pH decreased Gastric polyps Gastric ulcer  
 Gastric ulcer haemorrhage Gastritis Gastritis haemorrhagic  
 Gastroenteritis Gastrointestinal disorder Gastrointestinal  
 haemorrhageGastrointestinal infection Gastrointestinal neoplasm  
 Gastrointestinal obstructionGastrointestinal pain  
 Gastrointestinal stromal tumour Gastrointestinal tract  
 irritation Gastrooesophageal reflux disease Generalised oedema  
 Genital candidiasis Genital dischargeGestational  
 hypertension Gingival bleedingGingival infection Gingival  
 pain Gingival recession Gingivitis Glaucoma Glossitis  
 GlossodyniaGlucose tolerance decreased Glucose tolerance  
 impaired Glycosuria Glycosylated haemoglobin increasedGoitre  
 Gout Grand mal convulsion Gravitational oedema Groin pain  
 Gynaecomastia HaemangiomaHaematemesi s Haematochezia  
 Haematocrit decreased Haematoma Haematuria Haemoglobin  
 Haemoglobin decreased Haemoglobin increased Haemoglobinuria  
 Haemolysis Haemolytic anaemia HaemoptysisHaemorrhage  
 Haemorrhage intracranial Haemorrhagic disorder  
 Haemorrhoids HaemothoraxHallucination Hallucination,  
 auditory Hallucination, visual Hallucinations, mixed Hangover  
 Head discomfort Head titubation Headache Hearing impaired  
 Heart disease congenital Heart rate irregular Hemianopia  
 HemiparesisHemiplegia Hepatic cirrhosisHepatic enzyme  
 increased Hepatic failure Hepatic fibrosis Hepatic function  
 abnormal Hepatic necrosis Hepatic neoplasm malignant Hepatic  
 steatosis Hepatitis Hepatitis cholestatic Hepatitis fulminant  
 Hepatobiliary disease Hepatocellular injury Hepatomegaly  
 Hereditary disorder Hernia Herpes simplex Herpes  
 virus infection Herpes zoster Hiccups Hirsutism Homicidal  
 ideation Hordeolum Hormone level abnormal Hostility Hot flush  
 Hunger Hydrocephalus HyperacusisHyperaemia  
 Hyperaesthesia Hyperbilirubinaemia Hypercapnia  
 Hyperchloraemia Hyperchlorhydria Hypercholesterolaemia  
 Hyperglycaemia Hyperhidrosis Hyperinsulinism  
 Hyperkalaemia Hyperkeratosis Hyperkinesia  
 Hyperlipidaemia Hypermagnesaemia Hypernatraemia

Hyperparathyroidism    Hyperphagia    Hyperphosphataemia  
Hyperplasia    Hyperprolactinaemia    Hyperpyrexia  
Hyperreflexia    Hypersensitivity    Hypersexuality    Hypersomnia  
Hypertension    Hypertensive crisis    Hyperthermia  
Hyperthyroidism    Hypertonia    Hypertonic bladder  
Hypertrichosis    Hypertriglyceridaemia    Hypertrophy  
Hyperuricaemia    Hyperuricosuria    Hyperventilation  
Hypoaesthesia    Hypoaesthesia oral    Hypocalcaemia  
Hypocholesterolaemia    Hypocholesterolaemia    Hypochromic anaemia  
Hypoglycaemia    Hypogonadism    Hypohidrosis  
Hypokalaemia    Hypokinesia    Hypomagnesaemia    Hypomania  
Hypomenorrhoea    Hyponatraemia    Hypophagia    Hypoproteinaemia  
Hyporeflexia    Hypotension    Hypothermia    Hypothyroidism  
Hypotonia    Hypoventilation    Hypovitaminosis    Hypovolaemia  
Hypoxia    Idiopathic thrombocytopenic purpura    Ileus  
paralytic    Ill-defined disorder    Illusion    Immune system disorder  
Impaired healing    Inappropriate antidiuretic hormone secretion  
Incontinence    Increased appetite    Induration    Infarction  
Infected cyst    Infection    Infestation    Inflammation  
Influenza    Influenza like illness    Inguinal hernia    Initial  
insomnia    Injection site mass    Injection site pain    Injection  
site reaction    Inner ear disorder    Insomnia    Intention tremor  
Intentional self-injury    Intermittent claudication  
Interstitial lung disease    Intervertebral disc degeneration  
Intervertebral disc disorder    Intervertebral disc protrusion  
Intervertebral discitis    Intestinal functional disorder  
Intestinal obstruction    Intestinal perforation    Intracranial  
pressure increased    Intraocular pressure increased    Iritis  
Iron deficiency    Iron deficiency anaemia    Irritability  
Irritable bowel syndrome    Ischaemia    Ischaemic hepatitis  
Ischaemic stroke    Jaundice    Jaundice cholestatic    Joint  
contracture    Joint effusion    Joint range of motion decreased    Joint  
stiffness    Joint swelling    Judgement impaired    Keratitis  
Keratoconjunctivitis sicca    Keratopathy    Ketoacidosis  
Ketosis    Laboratory test abnormal    Lacrimal disorder  
Lacrimation decreased    Lacrimation increased    Lactic acidosis  
Lactose intolerance    Laryngeal cancer    Laryngeal disorder  
Laryngeal neoplasm    Laryngeal oedema    Laryngitis  
Laryngospasm    Left ventricular failure    Leiomyoma    Lens  
disorder    Lenticular opacities    Lenticular pigmentation  
Lethargy    Leukaemia    Leukocytoclastic vasculitis  
Leukocytosis    Leukoderma    Leukopenia    Leukoplakia oral  
Libido decreased    Libido increased    Lichenoid keratosis    Lip  
and/or oral cavity cancer    Lip blister    Lip dry    Lip swelling  
Lipoma    Livedo reticularis    Liver disorder    Liver  
function test abnormal    Liver injury    Lividity    Lobar pneumonia  
Local reaction    Localised infection    Localised oedema  
Logorrhoea    Loss of consciousness    Loss of libido    Lower  
respiratory tract infection    Lung adenocarcinoma stage I    Lung cancer  
metastatic    Lung disorder    Lung infiltration    Lung neoplasm  
malignant    Lymphadenitis    Lymphadenopathy    Lymphatic disorder  
Lymphocytic leukaemia    Lymphocytosis    Lymphoedema    Lymphoma  
Lymphopenia    Macular degeneration    Macule    Maculopathy    Major  
depression    Malaise    Male sexual dysfunction    Malignant  
melanoma    Mania    Masked facies    Mastitis    Mediastinal disorder

Melaena      Melanocytic naevus      Memory impairment      Meningitis  
Menopausal symptoms      Menopause      Menorrhagia      Menstrual  
disorder      Menstruation delayed      Menstruation irregular      Mental  
disability      Mental disorder      Mental retardation      Mental status  
changes      Metabolic alkalosis      Metastasis      Metastatic neoplasm  
Methaemoglobinaemia      Metrorrhagia      Micturition disorder  
Micturition urgency      Middle ear disorder      Middle ear  
effusion      Middle insomnia      Migraine with aura      Migraine without  
aura      Miosis      Mitral valve incompetence      Mobility decreased  
Monarthrititis      Monocytosis      Mood swings      Motion sickness      Mouth  
ulceration      Movement disorder      Multiple hereditary exostosis  
Multiple myeloma      Muscle atrophy      Muscle contractions  
involuntary      Muscle contracture      Muscle enzyme increased  
Muscle relaxant therapy      Muscle rigidity      Muscle spasms  
Muscle tightness      Muscle twitching      Muscular weakness  
Musculoskeletal chest pain      Musculoskeletal discomfort  
Musculoskeletal disorder      Musculoskeletal pain  
Musculoskeletal stiffness      Myalgia      Myasthenic syndrome  
Mydriasis      Myelitis      Myocardial infarction      Myocardial  
ischaemia      Myocarditis      Myoclonus      Myopathy      Myopia      Myositis  
Nail discolouration      Nail disorder      Nail infection  
Narcolepsy      Nasal congestion      Nasal discomfort      Nasal disorder  
Nasal dryness      Nasal oedema      Nasal polyps  
Nasopharyngitis      Nausea      Neck pain      Necrosis      Necrosis  
ischaemic      Neoplasm malignant      Neoplasm prostate      Neoplasm  
recurrence      Neoplasm skin      Nephritis      Nephrolithiasis      Nephrotic  
syndrome      Nerve root lesion      Nervous system disorder      Nervousness  
Neuralgia      Neuritis      Neurodermatitis      Neurogenic bladder  
Neuroleptic malignant syndrome      Neurological symptom  
Neuroma      Neuropathy peripheral      Neurosis      Neutropenia  
Neutrophil count decreased      Neutrophil count increased      Night  
blindness      Night sweats      Nightmare      Nocturia      Nodal arrhythmia  
Nodule      Normochromic normocytic anaemia      Nuchal rigidity  
Nystagmus      Obesity      Obsessive thoughts      Obstruction  
Obstructive airways disorder      Ocular hyperaemia      Oculogyric crisis  
Oedema      Oedema peripheral      Oesophageal achalasia      Oesophageal  
carcinoma      Oesophageal disorder      Oesophageal spasm      Oesophageal  
stenosis      Oesophageal ulcer      Oesophagitis      Oligomenorrhoea  
Oliguria      Onychomycosis      Opisthotonus      Optic atrophy  
Optic neuritis      Oral candidiasis      Oral neoplasm benign      Oral  
pain      Orchitis noninfective      Orgasm abnormal      Oropharyngeal  
discomfort      Oropharyngeal pain      Oropharyngeal spasm      Orthostatic  
hypotension      Osteoarthritis      Osteoarthropathy      Osteodystrophy  
Osteomyelitis      Osteonecrosis      Osteopenia      Osteoporosis  
Osteoporotic fracture      Otitis externa      Otitis media  
Otitis media acute      Otitis media chronic      Ovarian cancer  
Ovarian cyst      Pain      Pain in extremity      Pain in jaw      Pallor  
Palpitations      Pancreatitis acute      Pancytopenia      Panic  
attack      Panic disorder      Panic disorder with agoraphobia      Panic  
reaction      Papilloma      Papule      Paraesthesia oral      Paralysis  
Paranoia      Parasomnia      Paresis      Parkinsonian gait  
Parkinsonism      Paronychia      Parosmia      Parotid gland  
enlargement      Parotitis      Pathological fracture      Pathological gambling  
Pelvic inflammatory disease      Pelvic pain      Penis disorder  
Peptic ulcer      Pericardial effusion      Pericarditis

constrictive      Perineal pain      Periodontitis      Periorbital  
 oedema      Peripheral coldness      Peripheral ischaemia      Peripheral  
 vascular disorder      Peritoneal adhesions      Personality change  
     Personality disorder      Petechiae      Pharyngeal disorder  
     Pharyngeal erythema      Pharyngitis      Phlebitis      Phlebitis  
 superficial      Phobia      Phonological disorder      Photophobia      Photopsia  
     Photosensitivity allergic reaction      Photosensitivity reaction  
     Pigmentation disorder      Pituitary tumour benign  
     Plasmacytoma      Platelet count decreased      Pleural disorder  
     Pleural effusion      Pleural fibrosis      Pleurisy      Pleuritic pain  
     Pneumonia      Pneumonia aspiration      Pneumothorax      Poisoning  
     Poliomyelitis      Pollakiuria      Polyarteritis nodosa  
     Polycythaemia      Polydipsia      Polymyalgia rheumatica      Polyp  
     Polyuria      Post procedural infection      Postmenopausal  
 haemorrhage      Postural orthostatic tachycardia syndrome      Posture  
 abnormal      Pre-eclampsia      Precocious puberty      Premature  
 ejaculation      Premenstrual syndrome      Presyncope      Priapism      Procedural  
 pain      Proctalgia      Productive cough      Prolactinoma      Prostate cancer  
     Prostatic adenoma      Prostatic disorder      Prostatitis      Protein  
 urine present      Proteinuria      Protrusion tongue      Prurigo      Pruritus  
     Pruritus generalised      Pruritus genital      Pseudolymphoma  
     Psoriasis      Psychiatric symptom      Psychomotor retardation  
     Psychotic disorder      Puberty      Pulmonary congestion  
     Pulmonary embolism      Pulmonary fibrosis      Pulmonary  
 function test decreased      Pulmonary hypertension      Pulmonary oedema  
     Pulse absent      Punctate keratitis      Purpura  
     Pyelonephritis      Pyoderma      Pyuria      Rales      Rash erythematous  
     Rash generalised      Rash macular      Rash maculo-papular      Rash  
 papular      Rash pustular      Rash vesicular      Raynaud's phenomenon  
     Rectal cancer      Rectal haemorrhage      Rectal tenesmus      Red  
 blood cell count decreased      Red blood cell sedimentation rate  
 increased      Reflux oesophagitis      Regressive behaviour  
     Regurgitation      Renal artery stenosis      Renal colic      Renal cyst  
     Renal failure acute      Renal impairment      Renal neoplasm      Renal  
 pain      Respiratory acidosis      Respiratory alkalosis      Respiratory  
 arrest      Respiratory depression      Respiratory disorder      Respiratory  
 distress      Respiratory failure      Respiratory rate decreased  
     Respiratory tract congestion      Respiratory tract infection  
     Respiratory tract infection viral      Restless legs syndrome  
     Retching      Retinal artery occlusion      Retinal detachment  
     Retinal disorder      Retinal haemorrhage      Retinal vascular  
 disorder      Retinitis pigmentosa      Retrograde ejaculation  
     Retroperitoneal fibrosis      Rhabdomyolysis      Rheumatoid  
 arthritis      Rhinitis      Rhinitis allergic      Rhinitis seasonal      Rhinorrhoea  
     Rhonchi      Rosacea      Rotator cuff syndrome      Sacroiliitis  
     Saliva altered      Salivary duct obstruction      Salivary gland  
 disorder      Salivary gland enlargement      Salivary gland pain  
     Salivary hypersecretion      Salpingitis      Sarcoidosis      Sarcoma  
     Scab      Schizoaffective disorder      Schizophrenia  
     Schizophreniform disorder      Sciatica      Scotoma      Seasonal  
 allergy      Seborrhoeic dermatitis      Seborrhoeic keratosis      Sedation  
     Sensation of foreign body      Sensation of heaviness  
     Sensitisation      Sensory disturbance      Sensory loss  
     Sepsis      Septic shock      Severe acute respiratory syndrome  
     Sexual dysfunction      Shock      Sialoadenitis      Sicca syndrome

Sick sinus syndrome Sinus arrest Sinus arrhythmia Sinus  
 bradycardia Sinus congestion Sinus disorder Sinus headache Sinus  
 tachycardia Sinusitis Skin burning sensation Skin cancer Skin  
 discolouration Skin disorder Skin exfoliation Skin  
 hyperpigmentation Skin hypertrophy Skin infection Skin irritation  
 Skin lesion Skin mass Skin odour abnormal Skin papilloma  
 Skin ulcer Sleep apnoea syndrome Sleep attacks Sleep  
 disorder Sleep paralysis Sleep talking Sleep terror  
 Sluggishness Small intestinal obstruction Sneezing  
 Snoring Social avoidant behaviour Somnambulism  
 Somnolence Speech disorder Spinal osteoarthritis Spine  
 malformation Splenomegaly Spondylitis Squamous cell  
 carcinoma Status epilepticus Stevens-Johnson syndrome  
 Sticky skin Stomatitis Stress Stridor Stupor  
 Subarachnoid haemorrhage Subcutaneous abscess  
 Subcutaneous nodule Subdural haematoma Sudden death  
 Suicidal ideation Suicide attempt Superior sagittal sinus  
 thrombosis Supraventricular extrasystoles Supraventricular  
 tachycardia Surgery Suspiciousness Swelling Swelling face  
 Swollen tongue Syncope Synostosis Synovitis Systemic  
 lupus erythematosus Systolic hypertension Tachycardia Tachypnoea  
 Tardive dyskinesia Tearfulness Tenderness Tendinous  
 contracture Tendinitis Tenosynovitis Tension Tension headache  
 Terminal insomnia Testicular disorder Testicular pain  
 Testicular swelling Tetany Therapeutic response  
 decreased Therapeutic response increased Thinking abnormal  
 Thirst Thought blocking Throat irritation Throat tightness  
 Thrombocytopenia Thrombocytopenic purpura Thrombocytosis  
 Thrombophlebitis Thrombosis Thrombotic thrombocytopenic  
 purpura Thyroid adenoma Thyroid cancer Thyroid neoplasm  
 Thyroiditis Tic Tinnitus Tongue discolouration Tongue  
 disorder Tongue dry Tongue oedema Tongue paralysis Tongue  
 spasm Tongue ulceration Tonsillar hypertrophy Tonsillitis Tooth  
 abscess Tooth disorder Tooth impacted Tooth infection  
 Toothache Torsade de pointes Torticollis Toxic epidermal  
 necrolysis Tracheobronchitis Transaminases increased Transient  
 ischaemic attack Tremor Trismus Tuberculin test positive  
 Tubulointerstitial nephritis Ulcer Ulcer haemorrhage Umbilical  
 hernia Unevaluable event Unintended pregnancy Unresponsive to  
 stimuli Upper respiratory tract infection Upper-airway cough  
 syndrome Urethral disorder Urethral pain Urethritis Urinary  
 hesitation Urinary incontinence Urinary retention Urinary tract  
 disorder Urinary tract infection Urine abnormality Urine  
 analysis abnormal Urine output increased Urosepsis Urticaria  
 Uterine disorder Uterine haemorrhage Uterine leiomyoma  
 Uterine neoplasm Uterovaginal prolapse VIIIth nerve paralysis  
 Vaginal discharge Vaginal haemorrhage Vaginal infection  
 Vaginal inflammation Varicose vein Vascular headache  
 Vascular purpura Vasculitis Vasoconstriction Vasodilation  
 procedure Vasospasm Vein disorder Venous thrombosis Ventricular  
 arrhythmia Ventricular extrasystoles Ventricular failure  
 Ventricular fibrillation Ventricular hypertrophy  
 Ventricular tachycardia Vertigo Vestibular ataxia  
 Vestibular disorder Viral diarrhoea Viral infection  
 Vision blurred Visual acuity reduced Visual impairment

Vitamin B12 deficiency Vitreous detachment Vitreous disorder  
Vitreous floaters Vocal cord paralysis Vomiting  
Vulvovaginal candidiasis Vulvovaginal dryness  
Vulvovaginal mycotic infection Vulvovaginal pruritus  
Vulvovaginitis Water intoxication Weight decreased  
Weight fluctuation Weight increased Wheezing White blood  
cell count decreased White blood cell count increased White blood  
cells urine positive Withdrawal bleed Withdrawal hypertension  
Withdrawal syndrome Wound infection Xerophthalmia  
Xerosis Yawning

\*\*\*\*\*  
\*\*\*\*\*

Sodium-dependent multivitamin transporter - Group: Transporter

Treated with:

biotin: approved, nutraceutical small molecule (0 associated  
side effects) For nutritional supplementation, also for treating  
dietary shortage or imbalance.

lipoic acid: approved, nutraceutical small molecule (0  
associated side effects) For nutritional supplementation, also  
for treating dietary shortage or imbalance.

known side effects mediated through drugs targeting this protein:

\*\*\*\*\*  
\*\*\*\*\*

Prostaglandin E2 receptor, EP3 subtype - Group: Receptor

Treated with:

bimatoprost: approved small molecule (90 associated side  
effects) For the reduction of elevated intraocular pressure in  
patients with open angle glaucoma or ocular hypertension who are  
intolerant of other intraocular pressure lowering medications or  
insufficiently responsive (failed to achieve target IOP determined  
after multiple measurements over time) to another intraocular  
pressure lowering medication.

dinoprostone: approved small molecule (0 associated side  
effects) For the termination of pregnancy during the second  
trimester (from the 12th through the 20th gestational week as  
calculated from the first day of the last normal menstrual period),  
as well as for evacuation of the uterine contents in the management  
of missed abortion or intrauterine fetal death up to 28 weeks of  
gestational age as calculated from the first day of the last normal  
menstrual period. Also used in the management of nonmetastatic  
gestational trophoblastic disease (benign hydatidiform mole). Other  
indications include improving the cervical inducibility (cervical  
"ripening") in pregnant women at or near term with a medical or  
obstetrical need for labor induction, and the management of  
postpartum hemorrhage.

misoprostol: approved small molecule (102 associated side  
effects)

171 known side effects mediated through drugs targeting this  
protein:

Abdominal pain Acute coronary syndrome Alopecia Anaemia  
Anaphylactic shock Anorectal disorder Anxiety  
Arrhythmia Arterial thrombosis Arthralgia Arthritis

Asthenia Asthenopia Back pain Bladder pain Blepharitis  
 Blepharospasm Blindness Blister Blood alkaline  
 phosphatase increased Body temperature increased Breast pain  
 Bronchitis Bronchospasm Burning sensation Cardiac enzymes  
 increased Cataract Cerebrovascular accident Chalazion Chest  
 pain Chills Confusional state Conjunctival disorder  
 Conjunctival haemorrhage Conjunctival hyperaemia  
 Conjunctival oedema Conjunctivitis allergic  
 Constipation Corneal erosion Corneal oedema Cough  
 Cystitis Cystitis noninfective Deafness Dehydration  
 Dermatitis Dermatitis bullous Diarrhoea Diplopia  
 Dizziness Dry eye Dry mouth Dysgeusia Dysmenorrhoea  
 Dyspepsia Dysphagia Dyspnoea Dysuria Ear pain  
 Embolism Epistaxis Erectile dysfunction Erythema  
 Erythema of eyelid Eye discharge Eye irritation Eye  
 oedema Eye pain Eye pruritus Eye swelling Eyelid  
 irritation Eyelid oedema Eyelid pain Eyelids pruritus Fatigue  
 Feeling abnormal Flatulence Gastrointestinal disorder  
 Gastrointestinal haemorrhage Gastrointestinal pain  
 Gastroesophageal reflux disease Genital disorder female  
 Gingivitis Glycosuria Gout Growth of eyelashes Haematuria  
 Haemoglobin Haemorrhage Hair growth abnormal Headache  
 Hepatic function abnormal Hirsutism Hordeolum Hyperaemia  
 Hypercholesterolaemia Hyperhidrosis Hypersensitivity  
 Hypertension Hypotension Infarction Infection  
 Inflammation Inflammatory bowel disease Insomnia  
 Iritis Keratitis Lacrimation increased Liver function  
 test abnormal Loss of consciousness Loss of libido Madarosis  
 Menorrhagia Menstrual disorder Metrorrhagia Muscle  
 spasms Musculoskeletal discomfort Musculoskeletal stiffness  
 Myalgia Myocardial infarction Nasopharyngitis Nausea  
 Nervousness Neuropathy peripheral Neurosis Oedema  
 Oedema peripheral Pain Pallor Palpitations Pharyngitis  
 Phlebitis Photophobia Pigmentation disorder Pneumonia  
 Polyuria Pruritus Pulmonary embolism Punctate  
 keratitis Purpura Rash Red blood cell sedimentation rate  
 increased Respiratory tract infection Rhinitis Scotoma  
 Sensation of foreign body Shock Sinusitis Skin  
 discolouration Skin hyperpigmentation Somnolence Swelling  
 Syncope Tension Thirst Thrombocytopenia Thrombosis  
 Tinnitus Trichorrhexis Upper respiratory tract infection  
 Urinary tract infection Urine abnormality Urine analysis  
 abnormal Urine output increased Vaginal haemorrhage Vascular  
 purpura Vision blurred Visual acuity reduced Visual impairment  
 Vitreous floaters Vomiting

\*\*\*\*\*  
 \*\*\*\*\*

Type-2 angiotensin II receptor - Group: Receptor  
 Treated with:  
 tasosartan: approved small molecule (0 associated side effects)  
 Tasosartan is infrequently in the treatment of hypertension  
 and heart failure.

known side effects mediated through drugs targeting this protein:

\*\*\*\*\*  
\*\*\*\*\*

Gamma-aminobutyric-acid receptor subunit beta-1 - Group: Channel  
Treated with:

lorazepam: approved small molecule (126 associated side effects) For the management of anxiety disorders, and for treatment of status epilepticus.

ethchlorvynol: illicit,approved small molecule (0 associated side effects) Used for short-term hypnotic therapy in the management of insomnia for periods of up to one week in duration; however, this medication generally has been replaced by other sedative-hypnotic agents.

temazepam: approved small molecule (35 associated side effects) For the short-term treatment of insomnia (generally 7-10 days).

clobazam: illicit,approved small molecule (58 associated side effects) For treatment and management of epilepsy and anxiety disorder.

alprazolam: illicit,approved small molecule (178 associated side effects) For the management of anxiety disorder or the short-term relief of symptoms of anxiety and for the treatment of panic disorder, with or without agoraphobia.

lindane: approved small molecule (9 associated side effects) For the treatment of patients infested with *Sarcoptes scabiei* or pediculosis capitis who have either failed to respond to adequate doses, or are intolerant of other approved therapies.

chlordiazepoxide:illicit,approved small molecule (20 associated side effects) For the management of anxiety disorders or for the short-term relief of symptoms of anxiety, withdrawal symptoms of acute alcoholism, and preoperative apprehension and anxiety.

adinazolam: approved small molecule (0 associated side effects) For the treatment of anxiety and status epilepticus.

clorazepate: illicit,approved small molecule (0 associated side effects) For the management of anxiety disorders or for the short-term relief of the symptoms of anxiety. Also used as adjunctive therapy in the management of partial seizures and for the symptomatic relief of acute alcohol withdrawal.

midazolam: illicit,approved small molecule (119 associated side effects) For use as a sedative perioperatively.

flurazepam: illicit,approved small molecule (62 associated side effects) For short-term and intermittent use in patients with recurring insomnia and poor sleeping habits

halazepam: illicit,approved small molecule (0 associated side effects) Used to relieve anxiety, nervousness, and tension associated with anxiety disorders.

diazepam: illicit,approved small molecule (149 associated side effects) Used in the treatment of severe anxiety disorders, as a hypnotic in the short-term management of insomnia, as a sedative and premedicant, as an anticonvulsant, and in the management of alcohol withdrawal syndrome.

oxazepam: approved small molecule (36 associated side effects) For the treatment of anxiety disorders and alcohol withdrawal.

triazolam: illicit,approved,withdrawn small molecule (66 associated side effects) For the short-term treatment of insomnia.



clonazepam: illicit, approved small molecule (228 associated side effects) Used as an anticonvulsant in the treatment of the Lennox-Gastaut syndrome (petit mal variant), akinetic and myoclonic seizures.

estazolam: illicit, approved small molecule (131 associated side effects) For the short-term management of insomnia characterized by difficulty in falling asleep, frequent nocturnal awakenings, and/or early morning awakenings.

gamma hydroxybutyric acid: illicit, approved small molecule (0 associated side effects) Used as a general anesthetic, to treat conditions such as insomnia, clinical depression, narcolepsy, and alcoholism, and to improve athletic performance.

bromazepam: illicit, approved small molecule (47 associated side effects) For the short-term treatment of insomnia, short-term treatment of anxiety or panic attacks, if a benzodiazepine is required, and the alleviation of the symptoms of alcohol- and opiate-withdrawal.

clotiazepam: illicit, approved small molecule (0 associated side effects) For the treatment of anxiety disorders.

fludiazepam: illicit, approved small molecule (0 associated side effects) Used for the short-term treatment of anxiety disorders.

ketazolam: approved small molecule (0 associated side effects)

Ketazolam could be used for the treatment of anxiety. In approved countries, it is indicated for the treatment of anxiety, tension, irritability and similar stress related symptoms.

prazepam: illicit, approved small molecule (0 associated side effects) For the treatment of anxiety disorders.

quazepam: illicit, approved small molecule (0 associated side effects) Used to treat insomnia.

cinolazepam: approved small molecule (0 associated side effects) For the management of anxiety disorders or for the short-term relief of the symptoms of anxiety or anxiety associated with depressive symptoms.

nitrazepam: approved small molecule (44 associated side effects)

Used to treat short-term sleeping problems (insomnia), such as difficulty falling asleep, frequent awakenings during the night, and early-morning awakening.

486 known side effects mediated through drugs targeting this protein:

|                           |                                |                                      |
|---------------------------|--------------------------------|--------------------------------------|
| Abdominal discomfort      | Abdominal distension           | Abdominal pain                       |
| Abnormal dreams           | Abnormal faeces                | Acidosis                             |
| Acne                      | Affect lability                | Ageusia                              |
| Aggression                | Agitation                      | Agranulocytosis                      |
| Akathisia                 | Akinesia                       | Alcohol poisoning                    |
| Alopecia                  | Altered state of consciousness | Amblyopia                            |
| Amnesia                   | Anaemia                        | Anaphylactic shock                   |
| Anaphylactoid reaction    | Anger                          | Angioedema                           |
| Angiopathy                | Anorectal discomfort           | Anorectal disorder                   |
| Anterograde amnesia       | Anxiety                        | Aortic dissection                    |
| Apathy                    | Aphonia                        | Apnoea                               |
| Appetite disorder         | Arrhythmia                     | Arterial spasm                       |
| Arthralgia                | Arthritis                      | Aspartate aminotransferase increased |
| Aspiration                | Asthenia                       | Asthma                               |
| Ataxia                    | Athetosis                      | Atrioventricular block               |
| Back pain                 | Balance disorder               | Bladder dysfunction                  |
| Bladder pain              | Blindness                      | Blood alkaline phosphatase increased |
| Blood bilirubin increased | Blood disorder                 | Blood                                |

glucose decreased Blood thromboplastin decreased Body temperature  
 decreased Body temperature increased Borderline personality  
 disorder Bradycardia Bradyphrenia Brain oedema Breast  
 disorder Breast pain Breast swelling Bronchitis Bronchospasm  
 Candidiasis Carbon dioxide increased Cardiac arrest  
 Cardiac disorder Cardiac failure Cardio-respiratory arrest  
 Cardiovascular disorder Cellulitis Cerebellar syndrome  
 Chest discomfort Chest pain Chills Choking sensation  
 Chorea Chromaturia Clonic convulsion Clonus Clumsiness  
 Coagulopathy Cognitive disorder Coma Completed suicide  
 Confusional state Connective tissue disorder Constipation  
 Conversion disorder Convulsion Coordination abnormal Cough  
 Cyanosis Cystitis Cystitis noninfective Cytolytic  
 hepatitis Deafness Death Decreased appetite Dehydration  
 Delirium Delirium tremens Delusion Dependence  
 Depersonalisation Depressed level of consciousness Depressed  
 mood Depression Depressive symptom Derealisation Dermatitis  
 Dermatitis contact Dermatitis exfoliative Diarrhoea  
 Diplopia Discomfort Disinhibition Disorientation  
 Disturbance in attention Disturbance in sexual arousal  
 Dizziness Drooling Drug abuse Drug dependence Drug  
 eruption Drug intolerance Drug withdrawal convulsions Dry mouth  
 Dry skin Dysaesthesia Dysarthria Dysgeusia Dyskinesia  
 Dysmenorrhoea Dyspepsia Dysphagia Dysphonia Dysphoria  
 Dyspnoea Dysthymic disorder Dystonia Dysuria Ear  
 infection Ear pain Ecchymosis Effusion Ejaculation delayed  
 Ejaculation failure Emotional disorder Emotional  
 distress Emotional poverty Encephalopathy Encopresis Endometrial  
 sarcoma Energy increased Enterocolitis Enuresis  
 Eosinophilia Epilepsy Epistaxis Erectile dysfunction  
 Erythema Erythema multiforme Euphoric mood  
 Extrapyrimal disorder Extrasystoles Eye disorder  
 Eye irritation Eye movement disorder Eye pain Eye  
 swelling Face oedema Faecal incontinence Fatigue Feeling  
 abnormal Feeling cold Feeling drunk Feeling hot Feeling  
 jittery Feeling of body temperature change Flat affect Flatulence  
 Floppy infant Flushing Fungal infection Gait disturbance  
 Galactorrhoea Gangrene Gastric disorder Gastritis  
 Gastrointestinal disorder Gastrointestinal haemorrhage  
 Gastrointestinal pain Gingival pain Glossitis Glossodynia  
 Gout Grand mal convulsion Gynaecomastia Haematoma  
 Haematuria Haemoglobin Haemoglobin decreased Haemorrhage  
 Haemorrhage urinary tract Haemorrhoids Hallucination  
 Hangover Headache Hearing impaired Heart rate irregular  
 Hemiparesis Hepatic enzyme increased Hepatic failure  
 Hepatic function abnormal Hepatitis Hepatocellular injury  
 Hepatomegaly Herpes simplex Herpes virus infection  
 Hiccups Hirsutism Homicidal ideation Hordeolum  
 Hostility Hunger Hypercapnia Hyperhidrosis  
 Hyperkinesia Hyperprolactinaemia Hypersensitivity  
 Hypersomnia Hypertension Hypertonia Hyperventilation  
 Hypoaesthesia Hypochromic anaemia Hypokinesia Hypomania  
 Hyponatraemia Hypopnoea Hyporeflexia Hypotension  
 Hypothermia Hypotonia Hypoventilation Hypoxia Ill-defined  
 disorder Illusion Inappropriate antidiuretic hormone secretion

Incontinence      Increased appetite      Induration      Infection  
 Infectious mononucleosis      Infestation      Inflammation  
 Influenza      Injection site pain      Injection site reaction  
 Insomnia      Intraocular pressure increased      Irritability  
 Jaundice      Joint swelling      Laryngitis      Laryngospasm  
 Lethargy      Leukocytosis      Leukopenia      Libido decreased  
 Libido increased      Liver function test abnormal      Liver injury  
 Local reaction      Logorrhoea      Loss of consciousness      Loss of  
 libido      Lung disorder      Lymphadenopathy      Major depression  
 Malaise      Mania      Mean arterial pressure      Mediastinal disorder  
 Melaena      Memory impairment      Menstrual disorder  
 Menstruation irregular      Mental disability      Mental disorder  
 Mental retardation      Micturition urgency      Migraine  
 Miosis      Mood swings      Motion sickness      Movement disorder  
 Muscle relaxant therapy      Muscle rigidity      Muscle spasms  
 Muscle spasticity      Muscle twitching      Muscular weakness  
 Musculoskeletal discomfort      Musculoskeletal disorder  
 Musculoskeletal stiffness      Myalgia      Mydriasis      Myoclonus  
 Nasal congestion      Nasopharyngitis      Nausea      Neck pain  
 Necrosis      Nervous system disorder      Nervousness      Neuritis  
 Neuroleptic malignant syndrome      Neuropathy peripheral  
 Neutropenia      Nightmare      Nocturia      Nodal rhythm      Nodule  
 Nystagmus      Obstruction      Obstructive airways disorder      Oedema  
 Oedema peripheral      Oliguria      Oropharyngeal pain      Orthostatic  
 hypotension      Osteoarthritis      Otitis media      Pain      Pain in extremity  
 Pain in jaw      Pallor      Palpitations      Pancytopenia  
 Paraesthesia      Paraesthesia oral      Paralysis      Paresis  
 Pelvic pain      Penile discharge      Pericardial effusion      Periorbital  
 oedema      Personality disorder      Pheochromocytoma      Pharyngitis  
 Phlebitis      Photophobia      Photosensitivity reaction  
 Pigmentation disorder      Platelet count decreased      Pleurisy  
 Pneumonia      Pneumothorax      Pollakiuria      Polyuria      Post-  
 traumatic stress disorder      Precocious puberty      Premenstrual  
 syndrome      Presyncope      Proctalgia      Prothrombin level increased  
 Pruritus      Psychomotor retardation      Psychotic disorder  
 Puberty      Pulmonary congestion      Pulmonary function test  
 decreased      Pulmonary haemorrhage      Pulmonary hypertension      Pulmonary  
 oedema      Purpura      Rash      Rash maculo-papular      Rectal  
 haemorrhage      Rectal tenesmus      Renal failure      Respiratory arrest  
 Respiratory depression      Respiratory disorder      Respiratory  
 failure      Respiratory moniliiasis      Respiratory rate decreased  
 Respiratory tract congestion      Respiratory tract infection  
 Retching      Retrograde amnesia      Rhinitis allergic      Rhinorrhoea  
 Rhonchi      Salivary hypersecretion      Scotoma      Sedation  
 Sexual dysfunction      Shock      Sinus tachycardia      Sinusitis      Skin  
 burning sensation      Skin discolouration      Skin disorder      Skin  
 exfoliation      Skin necrosis      Sleep apnoea syndrome      Sleep disorder  
 Sleep talking      Sluggishness      Sneezing      Somnambulism  
 Somnolence      Speech disorder      Stevens-Johnson syndrome  
 Stomatitis      Strabismus      Stridor      Stupor      Substance abuse  
 Suicidal ideation      Swelling      Swelling face      Swollen tongue  
 Syncope      Tachycardia      Tachypnoea      Tenderness      Tendonitis  
 Tension      Therapeutic response decreased      Thinking abnormal  
 Thirst      Thrombocytopenia      Thrombocytosis      Thrombophlebitis  
 Thrombosis      Thyroid neoplasm      Tinnitus      Tongue coated

Tongue disorder Tongue oedema Tooth disorder Toothache  
 Toxic epidermal necrolysis Transaminases increased  
 Tremor Tropical spastic paresis Ulcer Upper airway  
 obstruction Upper respiratory tract infection Urethral disorder  
 Urinary hesitation Urinary incontinence Urinary retention  
 Urinary tract disorder Urinary tract infection Urine  
 colour abnormal Urine output increased Urticaria Vaginal discharge  
 Vaginal infection Vaginal inflammation Vascular purpura  
 Vasodilation procedure Venous thrombosis Ventricular arrhythmia  
 Ventricular extrasystoles Vertigo Viral infection  
 Vision blurred Visual acuity reduced Visual impairment  
 Vomiting Weight decreased Weight increased Wheezing  
 Withdrawal syndrome Xeroderma Xerophthalmia Yawning

\*\*\*\*\*  
 \*\*\*\*\*

Metabotropic glutamate receptor 4 - Group: Receptor

Treated with:

l-glutamic acid: approved, nutraceutical small molecule (0 associated side effects) Considered to be nature's "Brain food" by improving mental capacities; helps speed the healing of ulcers; gives a "lift" from fatigue; helps control alcoholism, schizophrenia and the craving for sugar.

known side effects mediated through drugs targeting this protein:

\*\*\*\*\*  
 \*\*\*\*\*

Vasopressin V1a receptor - Group: Receptor

Treated with:

desmopressin: approved small molecule (0 associated side effects) Oral formulations may be used to manage primary nocturnal enuresis in adults and vasopressin sensitive diabetes insipidus, and for control of temporary polyuria and polydipsia following head trauma or surgery in the pituitary region. Intranasal and parenteral formulations may be used to manage spontaneous or trauma-induced bleeds (e.g. hemarthrosis, intramuscular hematoma, mucosal bleeding) in patients with hemophilia A or von Willebrand's disease Type I. May also be used parenterally to prevent or treat bleeding in patients with uremia.

felypressin: approved biotech (0 associated side effects)  
 For use as an alternative to adrenaline as a localising agent, provided that local ischaemia is not essential.

conivaptan: approved small molecule (58 associated side effects)  
 For the treatment of euvolemic or hypervolemic hyponatremia (e.g. the syndrome of inappropriate secretion of antidiuretic hormone, or in the setting of hypothyroidism, adrenal insufficiency, pulmonary disorders, etc.) in hospitalized patients.

terlipressin: approved small molecule (0 associated side effects) Commonly used to stop bleeding of varices in the food pipe (oesophagus).

58 known side effects mediated through drugs targeting this protein:

Anaemia Angiopathy Aortic dissection Arrhythmia Arrhythmia  
 supraventricular Atrial fibrillation Body temperature increased  
 Candidiasis Cardiac disorder Cardiac fibrillation Confusional

state Constipation Dehydration Diarrhoea Dry mouth  
 Electrocardiogram ST segment Electrocardiogram ST segment  
 depression Erythema Feeling abnormal Gastrointestinal disorder  
 Haematuria Headache Hyperglycaemia Hypertension  
 Hypoglycaemia Hypokalaemia Hypomagnesaemia  
 Hyponatraemia Hypotension Infection Infestation Infusion  
 site reaction Insomnia Mediastinal disorder Mental disorder  
 Nausea Nervous system disorder Oedema Oedema  
 peripheral Oral candidiasis Oropharyngeal pain Orthostatic  
 hypotension Pain Phlebitis Pneumonia Pollakiuria Polyuria Post  
 procedural diarrhoea Pruritus Sepsis Swelling Thirst  
 Toxic epidermal necrolysis Urethral disorder Urinary tract  
 disorder Urinary tract infection Urine output increased  
 Vomiting

\*\*\*\*\*  
 \*\*\*\*\*

Adenosine A3 receptor - Group: Receptor

Treated with:

adenosine: approved small molecule (32 associated side effects)

Used as an initial treatment for the termination of paroxysmal supraventricular tachycardia (PVST), including that associated with accessory bypass tracts, and is a drug of choice for terminating stable, narrow-complex supraventricular tachycardias (SVT). Also used as an adjunct to thallous chloride TI 201 myocardial perfusion scintigraphy (thallium stress test) in patients who are unable to exercise adequately, as well as an adjunct to vagal maneuvers and clinical assessment to establish a specific diagnosis of undefined, stable, narrow-complex SVT.

aminophylline: approved small molecule (41 associated side effects) For the treatment of bronchospasm due to asthma, emphysema and chronic bronchitis.

67 known side effects mediated through drugs targeting this protein:

Abdominal pain Agitation Anxiety Arrhythmia Atrial  
 fibrillation Atrial tachycardia Back pain Blood pressure  
 increased Bradycardia Bronchospasm Burning sensation Cardiac  
 arrest Cardiac fibrillation Cardiac flutter Chest discomfort  
 Chest pain Chronic obstructive pulmonary disease Clonic  
 convulsion Convulsion Death Dermatitis contact Dermatitis  
 exfoliative Diarrhoea Disorientation Dizziness Dysgeusia  
 Dyspnoea Extrasystoles Flushing Gastrointestinal pain  
 Grand mal convulsion Haematemesi Haemodynamic  
 instability Headache Hyperglycaemia Hyperhidrosis  
 Hypersensitivity Hyperventilation Hypoaesthesia  
 Hypokalaemia Hypotension Hypoxia Insomnia  
 Irritability Loss of consciousness Nausea Nervous  
 system disorder Nervousness Pain Palpitations Paraesthesia  
 Poisoning Polyuria Rhabdomyolysis Sensory loss Shock  
 Sinus tachycardia Supraventricular tachycardia Tachycardia  
 Tension Throat tightness Torsade de pointes Tremor  
 Ventricular extrasystoles Ventricular fibrillation  
 Vision blurred Vomiting

\*\*\*\*\*  
 \*\*\*\*\*

Androgen receptor - Group: Receptor

Treated with:

levonorgestrel: approved small molecule (187 associated side effects) For the treatment of menopausal and postmenopausal disorders and alone or in combination with other hormones as an oral contraceptive.

spironolactone: approved small molecule (34 associated side effects) Used primarily to treat low-renin hypertension, hypokalemia, and Conn's syndrome.

flutamide: approved small molecule (55 associated side effects) For the management of locally confined Stage B2-C and Stage D2 metastatic carcinoma of the prostate

oxandrolone: approved small molecule (11 associated side effects) Use to promote weight gain after weight loss following extensive surgery.

testosterone: approved small molecule (274 associated side effects) To be used as hormone replacement or substitution of diminished or absent endogenous testosterone. Use in males: For management of congenital or acquired hypogonadism, hypogonadism associated with HIV infection, and male climacteric (andropause). Use in females: For palliative treatment of androgen-responsive, advanced, inoperable, metastatic (skeletal) carcinoma of the breast in women who are 1-5 years postmenopausal; testosterone esters may be used in combination with estrogens in the management of moderate to severe vasomotor symptoms associated with menopause in women who do not respond to adequately to estrogen therapy alone.

nilutamide: approved small molecule (101 associated side effects) For use in combination with surgical castration for the treatment of metastatic prostate cancer involving distant lymph nodes, bone, or visceral organs (Stage D2).

fludrocortisone: approved small molecule (81 associated side effects) For partial replacement therapy for primary and secondary adrenocortical insufficiency in Addison's disease and for the treatment of salt-losing adrenogenital syndrome.

drostanolone: illicit, approved small molecule (0 associated side effects) For use in females, for palliation of androgenresponsive recurrent mammary cancer in women who are more than one year but less than five years postmenopausal.

nandrolone phenpropionate: illicit, approved small molecule (0 associated side effects) For the treatment of refractory deficient red cell production anemias, breast carcinoma, hereditary angioedema, antithrombin III deficiency, fibrinogen excess, growth failure and Turner's syndrome. It is also indicated in the prophylaxis of hereditary angioedema.

bicalutamide: approved small molecule (187 associated side effects) For treatment (together with surgery or LHRH analogue) of advanced prostatic cancer.

fluoxymesterone: illicit, approved small molecule (35 associated side effects) In males, used as replacement therapy in conditions associated with symptoms of deficiency or absence of endogenous testosterone. In females, for palliation of androgenresponsive recurrent mammary cancer in women who are more than one year but less than five years postmenopausal.

drospirenone: approved small molecule (0 associated side effects) For the prevention of pregnancy in women who elect an oral contraceptive.

danazol: approved small molecule (89 associated side effects)  
For the treatment of endometriosis and fibrocystic breast disease (in patients unresponsive to simple measures). Also used for the prophylactic treatment of all types of hereditary angioedema in males and females.

testosterone propionate: approved small molecule (0 associated side effects) Testosterone propionate is an anabolic steroid and a short ester form of testosterone that becomes active in the body. It is often used for muscle mass building.

deltal-dihydrotestosterone: illicit,experimental small molecule (0 associated side effects)

boldenone: illicit,experimental small molecule (0 associated side effects)

calusterone: illicit,experimental small molecule (0 associated side effects) An anabolic steroid which can theoretically aid in restauration and buildup of certain tissues, especially muscle. It is similar to synthetic testosterone and is still in early investigation. It was also investigated for use as a treatment for metastatic breast cancer.

flufenamic acid: experimental small molecule (0 associated side effects)

(2r)-n-[4-cyano-3-(trifluoromethyl)phenyl]-3-[(4-fluorophenyl)sulfonyl]-2-hydroxy-2-methylpropanamide: experimental small molecule (0 associated side effects)

methyltrienolone:experimental small molecule (0 associated side effects)

(3aalpha,4alpha,7alpha,7aalpha)-3a,4,7,7a-tetrahydro-2-(4-nitro-1-naphthalenyl)-4,7-ethano-1h-isoindole-1,3(2h)-dione: experimental small molecule (0 associated side effects)

cyproterone: approved small molecule (165 associated side effects) For the palliative treatment of patients with advanced prostatic carcinoma.

methyltestosterone: approved small molecule (29 associated side effects) Methyltestosterone is an anabolic steroid hormone used to treat men with a testosterone deficiency. It is also used in women to treat breast cancer, breast pain, swelling due to pregnancy, and with the addition of estrogen it can treat symptoms of menopause.

17-hydroxy-18a-homo-19-nor-17alpha-pregna-4,9,11-trien-3-one: experimental small molecule (0 associated side effects)

(2s)-n-(4-cyano-3-iodophenyl)-3-(4-cyanophenoxy)-2-hydroxy-2-methylpropanamide: experimental small molecule (0 associated side effects)

2-chloro-4-[(7r,7as)-7-hydroxy-1,3-dioxotetrahydro-1h-pyrrolo[1,2-c]imidazol-2(3h)-yl]-3-methylbenzotrile: experimental small molecule (0 associated side effects)

(2s)-3-(4-chloro-3-fluorophenoxy)-n-[4-cyano-3-(trifluoromethyl)phenyl]-2-hydroxy-2-methylpropanamide: experimental small molecule (0 associated side effects)

4-[(1r,2s)-1,2-dihydroxy-2-methyl-3-(4-nitrophenoxy)propyl]amino}-2-(trifluoromethyl)benzotrile: experimental small molecule (0 associated side effects)

(2s)-2-hydroxy-2-methyl-n-[4-nitro-3-(trifluoromethyl)phenyl]-3-(pentafluorophenoxy)propanamide: experimental small molecule (0 associated side effects)

(2s)-3-[4-(acetylamino)phenoxy]-2-hydroxy-2-methyl-n-[4-nitro-3-(trifluoromethyl)phenyl]propanamide: experimental small molecule (0 associated side effects)

(r)-3-bromo-2-hydroxy-2-methyl-n-[4-nitro-3-(trifluoromethyl)phenyl]propanamide: experimental small molecule (0 associated side effects)

(5s,8r,9s,10s,13r,14s,17s)-13-{2-[(3,5-difluorobenzyl)oxy]ethyl}-17-hydroxy-10-methylhexadecahydro-3h-cyclopenta[a]phenanthren-3-one: experimental small molecule (0 associated side effects)

s-3-(4-fluorophenoxy)-2-hydroxy-2-methyl-n-[4-nitro-3-(trifluoromethyl)phenyl]propanamide: experimental small molecule (0 associated side effects)

1-tert-butyl-3-(2,5-dimethylbenzyl)-1h-pyrazolo[3,4-d]pyrimidin-4-amine: experimental small molecule (0 associated side effects)

4-[(7r,7as)-7-hydroxy-1,3-dioxotetrahydro-1h-pyrrolo[1,2-c]imidazol-2(3h)-yl]-1-naphthonitrile: experimental small molecule (0 associated side effects)

2-chloro-4-[[1,3z,7s,7as)-7-hydroxy-1-(trifluoromethyl)tetrahydro-1h-pyrrolo[1,2-c][1,3]oxazol-3-ylidene]amino}-3-methylbenzonitrile: experimental small molecule (0 associated side effects)

6-[bis(2,2-trifluoroethyl)amino]-4-(trifluoromethyl)quinolin-2(1h)-one: experimental small molecule (0 associated side effects)

3-[(4-amino-1-tert-butyl-1h-pyrazolo[3,4-d]pyrimidin-3-yl)methyl]phenol: experimental small molecule (0 associated side effects)

nandrolone decanoate: illicit,approved small molecule (0 associated side effects) For the treatment of refractory deficient red cell production anemias, breast carcinoma, hereditary angioedema, antithrombin III deficiency, fibrinogen excess, growth failure and Turner's syndrome. It is also indicated in the prophylaxis of hereditary angioedema.

575 known side effects mediated through drugs targeting this protein:

Abdominal distension Abdominal pain lower Abdominal symptom  
 Abnormal dreams Abscess Accommodation disorder Acne  
 Activated partial thromboplastin time prolonged Acute  
 coronary syndrome Acute tonsillitis Adenoma benign Affect lability  
 Affective disorder Aggression Agitation Agranulocytosis  
 Alanine aminotransferase increased Alcohol intolerance  
 Alkalosis Alkalosis hypokalaemic Alopecia Amenorrhoea  
 Amnesia Anaemia Anaemia macrocytic Anaphylactic  
 shock Anaphylactoid reaction Androgenetic alopecia Anger Angina  
 pectoris Angioedema Angiopathy Anorectal disorder Anxiety  
 Aortic dissection Aphasia Aplastic anaemia Apnoea  
 Appendicitis Appetite disorder Application site oedema  
 Application site reaction Arrhythmia Arterial disorder  
 Arthralgia Arthritis Ascites Aspartate aminotransferase  
 increased Assisted fertilisation Asthenia Asthma Ataxia  
 Atrial fibrillation Atrophy Azoospermia Back pain  
 Balanitis Benign breast neoplasm Benign intracranial  
 hypertension Benign prostatic hyperplasia Bladder cancer  
 Bladder irritation Bladder pain Bladder stenosis



Blindness Blister Blood alkaline phosphatase increased  
 Blood bilirubin increased Blood cholesterol increased Blood  
 cortisol decreased Blood creatinine increased Blood glucose  
 increased Blood insulin increased Blood pressure diastolic  
 decreased Blood pressure increased Blood pressure systolic  
 increased Blood prolactin increased Blood testosterone decreased  
 Blood triglycerides increased Blood urea increased Blood  
 uric acid Blood urine Blood urine present Body temperature  
 increased Bone disorder Bone pain Bradycardia Breast cancer  
 Breast discharge Breast disorder Breast enlargement  
 Breast feeding Breast neoplasm Breast pain Breast tenderness  
 Bronchitis Candidiasis Carbohydrate tolerance decreased  
 Cardiac arrest Cardiac disorder Cardiac failure Cardiac  
 failure congestive Cardiac fibrillation Cardiomegaly  
 Cardiovascular disorder Carpal tunnel syndrome Cataract  
 Cataract subcapsular Cerebral haemorrhage Cerebral  
 ischaemia Cerebrovascular accident Cervicitis Cervix disorder  
 Chapped lips Chest pain Chills Chloasma  
 Chromatopsia Chromaturia Chronic obstructive pulmonary  
 disease Cognitive disorder Coma Coma hepatic Compression  
 fracture Confusional state Congenital cystic kidney disease  
 Conjunctivitis Connective tissue disorder Constipation  
 Convulsion Coronary artery disease Cough Crying  
 Crystal urine Crystalluria Cushingoid Cystitis  
 Cystitis noninfective Cytogenetic abnormality Death  
 Decreased appetite Deep vein thrombosis Deficiency  
 anaemia Dehydration Dependence Depressed mood Depression  
 suicidal Dermatitis Dermatitis acneiform Dermatitis atopic  
 Dermatitis bullous Dermatitis contact Dermatitis  
 exfoliative Diabetes mellitus Diarrhoea Discomfort Dissociation  
 Disturbance in sexual arousal Dizziness Drug abuse Drug  
 dependence Drug eruption Drug tolerance Dry mouth Dry skin  
 Dysgeusia Dysmenorrhoea Dyspareunia Dyspepsia Dysphagia  
 Dysphonia Dyspnoea Dyspnoea exertional Dysuria Ear  
 disorder Ear infection Ecchymosis Eczema Effusion  
 Electrolyte imbalance Embolism Encephalitis  
 Encephalopathy Endocrine disorder Endometrial sarcoma  
 Endometriosis Endometritis Enlarged clitoris  
 Eosinophilia Epidermal necrosis Epididymitis  
 Epistaxis Erectile dysfunction Erythema Erythema  
 multiforme Erythema nodosum Exophthalmos Extravasation Eye  
 disorder Face oedema Fasting Fatigue Febrile neutropenia  
 Feeling abnormal Fibroadenoma of breast Fibrosis Flatulence  
 Fluid retention Flushing Folliculitis Fungal infection  
 Gait disturbance Galactorrhoea Gamma-glutamyltransferase  
 increased Gastric disorder Gastric haemorrhage Gastritis  
 Gastroenteritis Gastrointestinal carcinoma Gastrointestinal  
 disorder Gastrointestinal haemorrhage Gastrointestinal pain  
 Gastrooesophageal reflux disease Genital discharge Genital  
 infection Genital ulceration Gingival bleeding Gingival blister  
 Gingival erythema Gingival pain Gingivitis Glaucoma  
 Glossitis Glucose tolerance impaired Glycosuria Gout  
 Growth accelerated Gynaecomastia Haemarthrosis  
 Haematocrit increased Haematoma Haematuria Haemoglobin  
 abnormal Haemoglobin decreased Haemoglobin increased Haemolytic

anaemia      Haemorrhage Haemorrhoids      Hair colour changes      Hair  
 growth abnormal      Haptoglobin increased      Headache      Hemiplegia  
     Hepatic adenoma      Hepatic cirrhosis Hepatic encephalopathy  
     Hepatic failure      Hepatic function abnormal      Hepatic necrosis  
     Hepatic neoplasm      Hepatic neoplasm malignant      Hepatitis  
     Hepatitis fulminant      Hepatobiliary disease      Hepatomegaly  
     Hernia      Herpes simplex      Herpes virus infection      Herpes  
 zoster      High density lipoprotein decreased      Hirsutism      Hormone  
 level abnormal      Hostility      Hot flush      Hydronephrosis  
     Hyperaesthesia      Hypercalcaemia      Hypercholesterolaemia  
     Hyperglycaemia      Hyperhidrosis      Hyperinsulinism  
     Hyperkalaemia      Hyperkinesia      Hyperlipidaemia  
     Hypernatraemia      Hyperplasia      Hypersensitivity      Hypertension  
     Hypertonia      Hypertonic bladder      Hypertrichosis  
     Hypertriglyceridaemia      Hypertrophy      Hyperventilation  
     Hypoaesthesia      Hypochromic anaemia      Hypogeusia  
     Hypoglycaemia      Hypokalaemia      Hypomenorrhoea      Hypotension  
     Ichthyosis acquired      Ill-defined disorder      Immune system  
 disorder      Impaired healing      Impatience      Incontinence      Increased  
 appetite      Induration      Infarction      Infection      Infestation  
     Inflammation      Influenza      Influenza like illness      Injection  
 site inflammation      Injection site pain      Injection site reaction  
     Insomnia      International normalised ratio increased  
     Interstitial lung disease      Intestinal obstruction  
     Intracranial pressure increased      Intraocular pressure  
 increased      Iron deficiency anaemia      Irritability      Ischaemia  
     Jaundice      Jaundice cholestatic      Joint swelling      Laboratory  
 test abnormal      Lacrimation increased      Leiomyoma      Lethargy  
     Leukocytosis      Leukopenia      Leukoplakia      Libido decreased  
     Libido increased      Lipids abnormal      Lipids increased      Lipoatrophy  
     Liver function test abnormal      Loss of consciousness      Loss of  
 libido      Lung disorder      Lung infiltration      Major depression  
     Malaise      Mass      Mastitis      Mediastinal disorder      Medical  
 device complication      Melaena      Menometrorrhagia      Menopausal  
 symptoms      Menorrhagia      Menstrual disorder      Menstruation delayed  
     Menstruation irregular      Mental disorder      Methaemoglobinaemia  
     Metrorrhagia      Micturition urgency      Migraine      Mood swings  
     Muscle mass      Muscle rigidity      Muscle spasms      Muscle twitching  
     Muscular weakness      Musculoskeletal discomfort      Musculoskeletal  
 pain      Musculoskeletal stiffness      Myalgia      Myocardial infarction  
     Myopathy      Nasal congestion      Nasal oedema      Nasopharyngitis  
     Nausea      Neck pain      Necrosis      Neoplasm malignant  
     Neoplasm prostate      Nephrolithiasis      Nephropathy      Nervous system  
 disorder      Nervousness      Neuritis      Neuropathy peripheral      Neutropenia  
     Nipple disorder      Nipple pain      Nitrogen balance negative  
     Nocturia      Nodular regenerative hyperplasia      Nodule  
     Normochromic normocytic anaemia      Nuchal rigidity      Obstruction  
     Oedema      Oedema peripheral      Oesophagitis      Oesophagitis  
 ulcerative      Oligomenorrhoea      Optic atrophy      Optic neuritis      Oral  
 disorder      Oropharyngeal discomfort      Oropharyngeal pain  
     Osteonecrosis      Osteoporosis      Osteoporotic fracture  
     Otitis media      Ovarian cyst      Ovarian disorder      Pain in  
 extremity      Palpitations      Pancreatic disorder      Pancreatitis  
     Papilloedema      Papilloma      Paraesthesia      Parosmia  
     Pathological fracture      Peliosis hepatis      Pelvic pain      Penile pain

Penis disorder Peptic ulcer Perineal pain Peripheral  
 coldness Peripheral vascular disorder Personality disorder  
 Petechiae Pharyngitis Phlebitis Photophobia Photosensitivity  
 reaction Pituitary tumour Pleural disorder Pleural effusion  
 Pneumonia Pollakiuria Polycythaemia Polydipsia  
 Polymenorrhoea Polyp Polyuria Postmenopausal haemorrhage  
 Precocious puberty Premenstrual syndrome Presyncope  
 Priapism Proctitis Prostate cancer Prostatic adenoma  
 Prostatic disorder Prostatic specific antigen increased  
 Prostatitis Prostatomegaly Protein urine present Prothrombin  
 level decreased Prothrombin level increased Pruritus Pruritus  
 genital Pulmonary embolism Pulmonary fibrosis Purpura  
 Rash Rash maculo-papular Rash papular Rectal  
 haemorrhage Red blood cell count increased Renal failure Renal  
 impairment Respiratory disorder Respiratory tract infection  
 Retinal disorder Retinal vascular disorder Retinal vein  
 thrombosis Rhinitis Scar Sciatica Scleroderma Seborrhoeic  
 dermatitis Sensitisation Sensory loss Sepsis Serum  
 sickness Shock Sinusitis Skin cancer Skin discoloration Skin  
 disorder Skin exfoliation Skin hyperpigmentation Skin hypertrophy  
 Skin irritation Skin mass Skin striae Skin test positive  
 Skin ulcer Sleep apnoea syndrome Sleep disorder Soft tissue  
 disorder Somnolence Speech disorder Spermatozoa abnormal  
 Stomatitis Suicidal ideation Sulphaemoglobinaemia Surgery  
 Swelling Syncope Tachycardia Tearfulness Tenderness  
 Tendonitis Tension Testicular atrophy Thrombocytopenia  
 Thrombophlebitis Thrombosis Tonsillitis Tooth abscess Tooth  
 disorder Toothache Toxic epidermal necrolysis Tremor Ulcer  
 Upper respiratory tract infection Urethral disorder Urinary  
 hesitation Urinary incontinence Urinary retention Urinary tract  
 disorder Urinary tract infection Urine abnormality Urine  
 analysis abnormal Urine colour abnormal Urine output increased  
 Urogenital disorder Urticaria Uterine disorder Uterine  
 enlargement Uterine haemorrhage Uterine leiomyoma Uterine  
 perforation Vaginal discharge Vaginal haemorrhage Vaginal infection  
 Vaginal inflammation Vaginal neoplasm Varicocele Varicose  
 vein Vascular headache Vascular purpura Vasculitis Vasculitis  
 necrotising Vasodilation procedure Venous thrombosis Vertigo  
 Virilism Vision blurred Visual acuity reduced Visual  
 impairment Vitreous detachment Vomiting Vulval disorder  
 Vulvovaginal dryness Vulvovaginitis Weight decreased  
 Weight increased

\*\*\*\*\*  
 \*\*\*\*\*

Cysteinyl leukotriene receptor 2 - Group: Receptor

Treated with:

nedocromil: approved small molecule (44 associated side effects)

For the treatment of mild to moderate asthma

44 known side effects mediated through drugs targeting this protein:

Abdominal pain Anaphylactic shock Arthritis Asthenia Body  
 temperature increased Bronchitis Chest pain Cough Dermatitis  
 Diarrhoea Dizziness Dyspepsia Dyspnoea Eosinophilia  
 Erythema Fatigue Feeling abnormal Feeling hot  
 Gastrointestinal pain Headache Increased bronchial

secretion Infection Leukopenia Loeffler's syndrome Malaise  
Nasal congestion Nausea Neutropenia Ocular hyperaemia Pain  
Pharyngitis Photophobia Pneumonia Pulmonary eosinophilia Rash  
Respiratory disorder Respiratory tract infection Rhinitis  
Sinusitis Sputum increased Tremor Upper respiratory  
tract infection Viral infection Vomiting

\*\*\*\*\*  
\*\*\*\*\*

Choline transporter-like protein 1 - Group: Transporter

Treated with:

choline: approved, nutraceutical small molecule (0 associated  
side effects) For nutritional supplementation, also for treating  
dietary shortage or imbalance

known side effects mediated through drugs targeting this protein:

\*\*\*\*\*  
\*\*\*\*\*

5-hydroxytryptamine 1E receptor - Group: Receptor

Treated with:

eletriptan: approved small molecule (242 associated side  
effects) For the acute treatment of migraine with or without aura  
in adults.

ziprasidone: approved small molecule (251 associated side  
effects) For the treatment of schizophrenia and related psychotic  
disorders.

olanzapine: approved small molecule (393 associated side  
effects) For the acute and maintenance treatment of schizophrenia  
and related psychotic disorders, as well as acute treatment of manic  
or mixed episodes of bipolar 1 disorder. Intramuscular olanzapine is  
indicated for the rapid control of agitated patients.

clozapine: approved small molecule (228 associated side  
effects) For use in patients with treatment-resistant  
schizophrenia.

quetiapine: approved small molecule (359 associated side  
effects) For the treatment of schizophrenia and related psychotic  
disorders.

aripiprazole: approved small molecule (630 associated side  
effects) For the treatment of schizophrenia and related psychotic  
disorders.

840 known side effects mediated through drugs targeting this  
protein:

Abasia Abdominal discomfort Abdominal distension Abdominal  
pain Abdominal pain lower Abdominal pain upper Abdominal  
tenderness Abnormal dreams Abnormal faeces Abscess  
Accommodation disorder Acidosis Acne Acute coronary  
syndrome Acute psychosis Adenoma benign Affect lability  
Aggression Agitation Agoraphobia Agranulocytosis Akathisia  
Akinesia Alanine aminotransferase increased Albuminuria  
Alcohol intolerance Alkalosis Alopecia Altered state of  
consciousness Amblyopia Amenorrhoea Amnesia Anaemia  
Anaemia macrocytic Anaphylactic shock Anaphylactoid  
reaction Anger Angina pectoris Angioedema Angiopathy Angle  
closure glaucoma Anorectal disorder Anorgasmia Antisocial

behaviour Antisocial personality disorder Anxiety Aortic  
dissection Apathy Aphasia Aphthous stomatitis Apnoea  
Appendicitis Arrhythmia Arteriospasm coronary Arteritis  
Arthralgia Arthritis Arthropathy Asocial behaviour Aspartate  
aminotransferase increased Asphyxia Aspiration Asthenia  
Asthma Ataxia Atelectasis Atrial fibrillation  
Atrial flutter Atrioventricular block Atrioventricular block  
first degree Atrophy Azotaemia Back pain Balance disorder  
Basophilia Benign prostatic hyperplasia Bladder pain  
Blepharitis Blepharospasm Blindness Blister Blood  
alkaline phosphatase increased Blood bilirubin increased Blood  
cholesterol increased Blood creatine phosphokinase increased Blood  
creatinine increased Blood glucose decreased Blood glucose  
increased Blood insulin increased Blood lactate dehydrogenase  
increased Blood potassium decreased Blood potassium increased  
Blood pressure abnormal Blood pressure diastolic decreased  
Blood pressure fluctuation Blood pressure increased Blood  
pressure systolic decreased Blood prolactin increased Blood  
triglycerides increased Blood triglycerides normal Blood urea  
increased Blood uric acid increased Blood urine Blood urine  
present Blunted affect Body temperature decreased Body  
temperature increased Bone neoplasm Bone pain Bradycardia  
Bradykinesia Bradyphrenia Breast disorder Breast  
enlargement Breast feeding Breast pain Breath odour Bronchitis  
Bronchopneumopathy Bruxism Buccoglossal syndrome  
Bundle branch block Burning sensation Bursitis Calculus  
urinary Candidiasis Carbohydrate tolerance decreased Cardiac  
arrest Cardiac disorder Cardiac failure Cardiac failure  
congestive Cardiac fibrillation Cardiac flutter Cardiac murmur  
Cardio-respiratory arrest Cardiomegaly Cardiomyopathy  
Cardiopulmonary failure Cardiovascular disorder  
Carpal tunnel syndrome Cataplexy Cataract Catatonia Cells  
in urine Cellulitis Cerebral haemorrhage Cerebral infarction  
Cerebral ischaemia Cerebrovascular accident  
Cerebrovascular disorder Cervicitis Chapped lips  
Cheilitis Chest discomfort Chest pain Chills Choking  
Choking sensation Cholecystitis Cholelithiasis Cholestasis  
Choreoathetosis Chronic obstructive pulmonary disease  
Coccydynia Cognitive disorder Cogwheel rigidity Cold sweat  
Colitis ischaemic Coma Completed suicide Condition aggravated  
Confusional state Conjunctivitis Connective tissue disorder  
Constipation Conversion disorder Convulsion  
Coordination abnormal Corneal lesion Costochondritis Cough  
Cyanosis Cystitis Cystitis noninfective Deafness Death  
Decreased appetite Decubitus ulcer Deep vein thrombosis  
Deficiency anaemia Dehydration Delirium Delusion  
Dementia Dental caries Dependence Depersonalisation  
Depressed level of consciousness Depression Depressive  
symptom Derealisation Dermal cyst Dermatitis Dermatitis atopic  
Dermatitis bullous Dermatitis contact Dermatitis  
exfoliative Diabetes mellitus Diabetic coma Diabetic  
hyperglycaemic coma Diabetic hyperosmolar coma Diabetic  
ketoacidosis Diarrhoea Diplopia Discomfort Disorientation  
Disturbance in attention Disturbance in sexual arousal  
Dizziness Dizziness exertional Dizziness postural

Drooling Drug abuse Drug dependence Drug eruption Drug  
 interaction Dry eye Dry mouth Dry skin Dry throat Duodenal  
 ulcer Dysarthria Dysgeusia Dyskinesia Dysmenorrhoea Dyspepsia  
 Dysphagia Dysphemia Dysphonia Dysphoria Dyspnoea  
 Dystonia Dysuria Ear disorder Ear infection Ear  
 pain Ecchymosis Eczema Effusion Ejaculation disorder  
 Elastosis perforans Electrocardiogram QT prolonged  
 Electrocardiogram ST segment elevation Electrocardiogram T  
 wave inversion Electrocardiogram abnormal Electrocardiogram  
 change Electroencephalogram abnormal Embolism  
 Encephalopathy Endocrine disorder Energy increased  
 Enteritis Enuresis Eosinophilia Epididymitis  
 Epilepsy Epistaxis Erectile dysfunction Eructation  
 Erythema Erythema multiforme Euphoric mood Exfoliative  
 rash Exostosis Extrapyrarnidal disorder Extrasystoles Eye  
 discharge Eye disorder Eye haemorrhage Eye infection Eye  
 inflammation Eye irritation Eye pain Eyelid disorder  
 Eyelid function disorder Eyelid oedema Eyelid ptosis  
 Face oedema Facial pain Facial paresis Faecal incontinence  
 Faecalith Faecaloma Faeces hard Fasting Fatigue Fear  
 Feeling abnormal Feeling cold Feeling hot Feeling jittery  
 Female sexual dysfunction Flank pain Flat affect Flatulence  
 Flushing Folliculitis Formication Fungal infection  
 Fungal skin infection Furuncle Gait disturbance  
 Galactorrhoea Gamma-glutamyltransferase increased  
 Gastric disorder Gastric pH decreased Gastric ulcer  
 Gastric ulcer haemorrhage Gastritis Gastroenteritis  
 Gastrointestinal disorder Gastrointestinal haemorrhage  
 Gastrointestinal pain Gastrooesophageal reflux disease  
 Genital discharge Gingival bleeding Gingival pain Gingivitis  
 Glaucoma Glossitis Glossodynia Glucose tolerance decreased  
 Glucose tolerance impaired Glycosuria Glycosylated  
 haemoglobin increased Goitre Gout Grand mal convulsion Groin  
 pain Gynaecomastia Haematemesis Haematochezia Haematocrit  
 decreased Haematoma Haematuria Haemoglobin Haemoglobin decreased  
 Haemoglobin increased Haemolysis Haemoptysis Haemorrhage  
 Haemorrhage intracranial Haemorrhoids Hallucination  
 Hallucination, auditory Hallucination, visual Hangover  
 Head discomfort Headache Heart disease congenital Heart  
 rate irregular Hemiparesis Hemiplegia Hepatic enzyme increased  
 Hepatic failure Hepatic steatosis Hepatitis Hepatobiliary  
 disease Hepatomegaly Hernia Hiccups Hirsutism  
 Homicidal ideation Hormone level abnormal Hostility Hot  
 flush Hyperacusis Hyperaesthesia Hyperbilirubinaemia  
 Hyperchloraemia Hyperchlorhydria Hypercholesterolaemia  
 Hyperglycaemia Hyperhidrosis Hyperinsulinism  
 Hyperkalaemia Hyperkeratosis Hyperkinesia  
 Hyperlipidaemia Hypernatraemia Hyperparathyroidism  
 Hyperpathia Hyperplasia Hyperreflexia Hypersensitivity  
 Hypersomnia Hypertension Hypertensive crisis  
 Hyperthermia Hyperthyroidism Hypertonia  
 Hypertriglyceridaemia Hypertrophy Hyperuricaemia  
 Hyperventilation Hypoaesthesia Hypoaesthesia oral  
 Hypocalcaemia Hypochloraemia Hypocholesterolaemia  
 Hypochromic anaemia Hypoglycaemia Hypokalaemia

Hypokinesia Hypomagnesaemia Hypomania Hypomenorrhoea  
 Hyponatraemia Hypophagia Hypoproteinaemia Hyporeflexia  
 Hypotension Hypothermia Hypothyroidism Hypotonia  
 Hypoventilation Hypoxia Idiopathic thrombocytopenic  
 purpura Ileus Ileus paralytic Ill-defined disorder Immune  
 system disorder Inappropriate antidiuretic hormone secretion  
 Incontinence Increased appetite Increased bronchial  
 secretion Induration Infarction Infection Infestation  
 Inflammation Influenza Inguinal hernia Injection site  
 mass Injection site pain Injection site reaction Insomnia  
 Intention tremor Intentional self-injury Interstitial lung  
 disease Intestinal functional disorder Intestinal obstruction  
 Intestinal perforation Iron deficiency Iron deficiency  
 anaemia Irritability Irritable bowel syndrome Ischaemia  
 Ischaemic stroke Jaundice Jaundice cholestatic Joint  
 contracture Joint range of motion decreased Joint stiffness Joint  
 swelling Judgement impaired Keratitis Ketoacidosis  
 Ketosis Laboratory test abnormal Lacrimal disorder  
 Lacrimation increased Laryngitis Laryngospasm Leiomyoma  
 Lens disorder Lenticular opacities Lenticular  
 pigmentation Lethargy Leukocytosis Leukoderma Leukopenia  
 Leukoplakia oral Libido decreased Libido increased Lip dry  
 Liver disorder Liver function test abnormal Logorrhoea Loss  
 of consciousness Loss of libido Lower respiratory tract infection  
 Lymphadenopathy Lymphocytosis Lymphoedema Major depression  
 Malaise Male sexual dysfunction Mania Masked facies  
 Mastitis Mediastinal disorder Melaena Memory impairment  
 Menopausal symptoms Menorrhagia Menstrual disorder  
 Menstruation irregular Mental disability Mental disorder  
 Mental retardation Mental status changes Metrorrhagia  
 Micturition urgency Migraine Miosis Mitral valve  
 incompetence Mobility decreased Monocytosis Mood swings Mouth  
 ulceration Movement disorder Muscle atrophy Muscle contractions  
 involuntary Muscle contracture Muscle enzyme increased  
 Muscle relaxant therapy Muscle rigidity Muscle spasms  
 Muscle tightness Muscle twitching Muscular weakness  
 Musculoskeletal chest pain Musculoskeletal discomfort  
 Musculoskeletal pain Musculoskeletal stiffness Myalgia  
 Myasthenic syndrome Mydriasis Myocardial infarction  
 Myocardial ischaemia Myocarditis Myoclonus Myopathy Nasal  
 congestion Nasal disorder Nasal dryness Nasopharyngitis  
 Nausea Neck pain Neoplasm Nephritis Nephrolithiasis  
 Nervous system disorder Nervousness Neuralgia  
 Neurodermatitis Neuroleptic malignant syndrome Neuropathy  
 peripheral Neurosis Neutropenia Neutrophil count decreased  
 Neutrophil count increased Night sweats Nightmare  
 Nocturia Normochromic normocytic anaemia Nuchal rigidity  
 Nystagmus Obesity Obsessive thoughts Obstruction  
 Ocular hyperaemia Oculogyric crisis Oedema Oedema peripheral  
 Oesophageal disorder Oesophageal ulcer Oesophagitis  
 Oliguria Onychomycosis Opisthotonus Oral candidiasis  
 Oral pain Orchitis noninfective Oropharyngeal discomfort  
 Oropharyngeal pain Oropharyngeal spasm Orthostatic  
 hypotension Osteoarthritis Osteopenia Osteoporosis Otitis  
 externa Otitis media Ovarian cyst Pain Pain in extremity

Pain in jaw Pallor Palpitations Pancreatitis  
 Pancreatitis acute Panic attack Panic disorder Panic  
 disorder with agoraphobia Panic reaction Paraesthesia  
 Paraesthesia oral Paralysis Paranoia Parkinsonian gait  
 Parosmia Pathological fracture Pelvic pain Peptic ulcer  
 Pericardial effusion Pericarditis Periodontitis  
 Periorbital oedema Peripheral vascular disorder Personality  
 disorder Petechiae Pharyngeal erythema Pharyngitis Phlebitis  
 Phobia Phonological disorder Photophobia Photopsia  
 Photosensitivity reaction Platelet count decreased  
 Pleural disorder Pleural effusion Pneumonia Pneumonia  
 aspiration Poisoning Pollakiuria Polycythaemia Polydipsia  
 Polyuria Premature ejaculation Premenstrual syndrome  
 Presyncope Priapism Productive cough Prostatitis Protein  
 urine present Proteinuria Protrusion tongue Pruritus Pruritus  
 genital Psoriasis Psychiatric symptom Psychomotor  
 retardation Psychotic disorder Pulmonary congestion Pulmonary  
 embolism Pulmonary oedema Purpura Pyelonephritis Pyuria  
 Rash Rash erythematous Rash maculo-papular Rash papular  
 Rash pustular Rash vesicular Rectal haemorrhage Red  
 blood cell count decreased Red blood cell sedimentation rate  
 increased Reflux oesophagitis Regressive behaviour Renal  
 failure acute Renal pain Respiratory alkalosis Respiratory  
 arrest Respiratory disorder Respiratory distress Respiratory  
 failure Respiratory tract congestion Respiratory tract infection  
 Respiratory tract infection viral Restless legs syndrome  
 Retching Rhabdomyolysis Rheumatoid arthritis Rhinitis  
 Rhinitis allergic Rhinitis seasonal Rhinorrhoea Rhonchi  
 Rosacea Salivary gland enlargement Salivary  
 hypersecretion Scab Schizoaffective disorder Schizophreniform  
 disorder Sciatica Scotoma Seasonal allergy Seborrhoeic  
 dermatitis Sedation Sensation of heaviness Sensory loss  
 Sepsis Septic shock Sexual dysfunction Shock Sinus  
 congestion Sinus disorder Sinus headache Sinus tachycardia  
 Sinusitis Skin discolouration Skin disorder Skin  
 hypertrophy Skin irritation Skin ulcer Sleep apnoea syndrome Sleep  
 disorder Sleep talking Sluggishness Sneezing Social  
 avoidant behaviour Somnambulism Somnolence Speech disorder  
 Sputum increased Status epilepticus Stevens-Johnson  
 syndrome Stomatitis Stridor Stupor Subarachnoid  
 haemorrhage Subdural haematoma Sudden death Suicidal ideation  
 Suicide attempt Supraventricular tachycardia Suspiciousness  
 Swelling Swelling face Swollen tongue Syncope  
 Tachycardia Tardive dyskinesia Tenderness Tendonitis  
 Tenosynovitis Tension Tension headache Testicular pain  
 Thinking abnormal Thirst Thought blocking Throat tightness  
 Thrombocytopenia Thrombocytopenic purpura Thrombocytosis  
 Thrombophlebitis Thrombosis Thyroid adenoma Thyroiditis Tic  
 Tinnitus Tongue discolouration Tongue disorder Tongue dry  
 Tongue oedema Tongue paralysis Tongue spasm Tonsillar  
 hypertrophy Tooth abscess Tooth disorder Tooth impacted Tooth  
 infection Toothache Torsade de pointes Torticollis Toxic  
 epidermal necrolysis Transaminases increased Transient  
 ischaemic attack Tremor Trismus Tuberculin test positive  
 Tubulointerstitial nephritis Ulcer Ulcer haemorrhage Unintended



pregnancy Upper respiratory tract infection Urethral disorder  
 Urinary hesitation Urinary incontinence Urinary retention  
 Urinary tract disorder Urinary tract infection Urine  
 output increased Urosepsis Urticaria Uterine disorder Uterine  
 haemorrhage Uterine leiomyoma Uterovaginal prolapse VIIth nerve  
 paralysis Vaginal discharge Vaginal haemorrhage Vaginal infection  
 Vaginal inflammation Varicose vein Vascular purpura  
 Vasculitis Vasodilation procedure Vasospasm Venous thrombosis  
 Ventricular arrhythmia Ventricular extrasystoles Ventricular  
 fibrillation Ventricular tachycardia Vertigo Viral  
 diarrhoea Viral infection Vision blurred Visual acuity reduced  
 Visual impairment Vomiting Vulvovaginal candidiasis  
 Vulvovaginal mycotic infection Vulvovaginal pruritus  
 Vulvovaginitis Water intoxication Weight decreased  
 Weight fluctuation Weight increased Wheezing White blood  
 cell count decreased White blood cell count increased White blood  
 cells urine positive Withdrawal syndrome Xerosis Yawning  
 \*\*\*\*\*  
 \*\*\*\*\*

Urea Transporter 2 - Group: Transporter

Treated with:

urea: experimental small molecule (2 associated side effects)

1 known side effects mediated through drugs targeting this protein:  
 Pruritus

\*\*\*\*\*  
 \*\*\*\*\*

Histamine H4 receptor - Group: Receptor

Treated with:

clozapine: approved small molecule (228 associated side effects) For use in patients with treatment-resistant schizophrenia.

histamine phosphate: approved small molecule (0 associated side effects) Histamine phosphate is indicated as a diagnostic aid for evaluation of gastric acid secretory function.

228 known side effects mediated through drugs targeting this protein:

Abdominal discomfort Abdominal distension Abnormal faeces Acute coronary syndrome Agitation Akathisia Akinesia Amnesia  
 Anaemia Angina pectoris Angle closure glaucoma Anxiety  
 Aphasia Arrhythmia Arthralgia Aspiration Asthenia  
 Ataxia Blood triglycerides increased Blood uric acid  
 increased Body temperature decreased Body temperature increased  
 Bradycardia Breast pain Bronchitis Cardiac arrest Cardiac  
 failure Cardiac fibrillation Cardiomyopathy Cataplexy Chest  
 pain Chills Cholestasis Coma Confusional state Constipation  
 Convulsion Cough Cyanosis Decreased appetite Deep vein  
 thrombosis Delirium Delusion Dementia Dependence Dermatitis  
 Diabetes mellitus Diabetic hyperosmolar coma Diarrhoea  
 Discomfort Dizziness Drug abuse Drug dependence Dry mouth  
 Dry throat Dysarthria Dysgeusia Dyskinesia Dysmenorrhoea  
 Dyspepsia Dysphagia Dysphemia Dyspnoea Dystonia Ear  
 disorder Eczema Effusion Ejaculation disorder  
 Electrocardiogram change Electroencephalogram abnormal

Embolism Eosinophilia Epistaxis Erectile dysfunction  
 Eructation Erythema Erythema multiforme Extrapyrarnidal  
 disorder Eyelid disorder Faecalith Faecaloma Fatigue  
 Feeling abnormal Gastric disorder Gastric ulcer  
 Gastroenteritis Glaucoma Glucose tolerance impaired  
 Haematemesis Haemoglobin increased Haemorrhage  
 Hallucination Headache Heart disease congenital  
 Hepatitis Hot flush Hypercholesterolaemia Hyperglycaemia  
 Hyperhidrosis Hyperkinesia Hypersensitivity  
 Hypertension Hypertriglyceridaemia Hyperuricaemia  
 Hyperventilation Hypoaesthesia Hypokinesia Hyponatraemia  
 Hypotension Hypothermia Ileus paralytic Ill-defined disorder  
 Incontinence Increased appetite Infarction Infection  
 Insomnia Intestinal obstruction Irritability Jaundice  
 Ketoacidosis Laryngitis Lethargy Leukocytosis  
 Leukopenia Loss of consciousness Lower respiratory tract  
 infection Malaise Menopausal symptoms Micturition urgency  
 Mitral valve incompetence Muscle rigidity Muscle spasms  
 Muscle twitching Muscular weakness Musculoskeletal discomfort  
 Myalgia Myasthenic syndrome Mydriasis Myocardial  
 infarction Myocarditis Myoclonus Nasal congestion Nasopharyngitis  
 Nausea Nephritis Neutropenia Nightmare Nystagmus  
 Obstruction Ocular hyperaemia Oedema Oropharyngeal  
 discomfort Oropharyngeal pain Osteoarthritis Pain Pallor  
 Palpitations Pancreatitis Pancreatitis acute  
 Paraesthesia Paranoia Pericardial effusion  
 Pericarditis Periorbital oedema Petechiae Phlebitis  
 Photosensitivity reaction Pleural disorder Pleural effusion  
 Pneumonia Pollakiuria Polydipsia Priapism Protrusion tongue  
 Pruritus Psychotic disorder Pulmonary embolism Rash  
 Rectal haemorrhage Red blood cell sedimentation rate  
 increased Respiratory arrest Respiratory tract infection  
 Rhabdomyolysis Rhinorrhoea Salivary gland enlargement  
 Salivary hypersecretion Sedation Sensory loss  
 Sepsis Shock Sneezing Somnolence Status epilepticus  
 Sudden death Suicidal ideation Swelling Syncope  
 Tachycardia Tardive dyskinesia Tenderness Throat tightness  
 Thrombocytopenia Thrombocytosis Thrombophlebitis Thrombosis  
 Tic Tooth impacted Torsade de pointes Toxic epidermal  
 necrolysis Tremor Tubulointerstitial nephritis Ulcer Urinary  
 retention Urticaria Vasculitis Venous thrombosis Ventricular  
 extrasystoles Ventricular fibrillation Ventricular  
 tachycardia Vertigo Visual impairment Vomiting Vulvovaginal  
 pruritus Weight decreased Weight increased Wheezing White blood  
 cell count decreased

\*\*\*\*\*  
 \*\*\*\*\*

Adrenocorticotropic hormone receptor - Group: Receptor

Treated with:

cosyntropin: approved biotech (0 associated side effects)

For use as a diagnostic agent in the screening of patients presumed to have adrenocortical insufficiency.

corticotropin: approved biotech (0 associated side effects)

For use as a diagnostic agent in the screening of patients presumed to have adrenocortical insufficiency.

known side effects mediated through drugs targeting this protein:
